# Supplementary material for: Pseudallenes A and B, new sulfur-containing ovalicin sesquiterpenoid derivatives with antimicrobial activity from the deep-sea cold seep sediment-derived fungus Pseudallescheria boydii CS-793
Source: publisher site journal article supplement (doi:10.3762/bjoc.20.42), 2024-02-28

## checkCIF/PLATON report

Structure factors have been supplied for datablock(s) t

THIS REPORT IS FOR GUIDANCE ONLY. IF USED AS PART OF A REVIEW PROCEDURE FOR PUBLICATION, IT SHOULD NOT REPLACE THE EXPERTISE OF AN EXPERIENCED CRYSTALLOGRAPHIC REFEREE.

No syntax errors found.      CIF dictionary      Interpreting this report

### Datablock: t

---

|                        |                           |                            |
|------------------------|---------------------------|----------------------------|
| Bond precision:        | C-C = 0.0055 A            | Wavelength=1.54178         |
| Cell:                  | a=13.9963 (1)<br>alpha=90 | b=13.9963 (1)<br>beta=90   |
|                        |                           | c=30.1665 (6)<br>gamma=120 |
| Temperature:           | 173 K                     |                            |
|                        | Calculated                | Reported                   |
| Volume                 | 5117.79 (13)              | 5117.78 (13)               |
| Space group            | P 61                      | P 61                       |
| Hall group             | P 61                      | P 61                       |
| Moiety formula         | C16 H26 O5 S              | C16 H26 O5 S               |
| Sum formula            | C16 H26 O5 S              | C16 H26 O5 S               |
| Mr                     | 330.43                    | 330.43                     |
| Dx, g cm <sup>-3</sup> | 1.287                     | 1.287                      |
| Z                      | 12                        | 12                         |
| Mu (mm <sup>-1</sup> ) | 1.863                     | 1.863                      |
| F000                   | 2136.0                    | 2136.0                     |
| F000'                  | 2146.24                   |                            |
| h, k, lmax             | 16, 16, 36                | 16, 16, 36                 |
| Nref                   | 6254 [ 3191]              | 6250                       |
| Tmin, Tmax             | 0.779, 0.800              | 0.602, 0.753               |
| Tmin'                  | 0.707                     |                            |

Correction method= # Reported T Limits: Tmin=0.602 Tmax=0.753  
AbsCorr = MULTI-SCAN

Data completeness= 1.96/1.00      Theta (max)= 68.266

|                                |                                  |
|--------------------------------|----------------------------------|
| R(reflections)= 0.0317 ( 5717) | wR2(reflections)= 0.0883 ( 6250) |
| S = 0.947                      | Npar= 442                        |

---

The following ALERTS were generated. Each ALERT has the format

**test-name\_ALERT\_alert-type\_alert-level.**

Click on the hyperlinks for more details of the test.

---

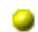

### Alert level C

|                   |                                                  |         |              |
|-------------------|--------------------------------------------------|---------|--------------|
| PLAT089_ALERT_3_C | Poor Data / Parameter Ratio (Zmax < 18) .....    | 7.22    | Note         |
| PLAT220_ALERT_2_C | NonSolvent Resd 1 C Ueq(max)/Ueq(min) Range      | 3.1     | Ratio        |
| PLAT220_ALERT_2_C | NonSolvent Resd 2 C Ueq(max)/Ueq(min) Range      | 3.2     | Ratio        |
| PLAT241_ALERT_2_C | High 'MainMol' Ueq as Compared to Neighbors of   | C7      | Check        |
| PLAT241_ALERT_2_C | High 'MainMol' Ueq as Compared to Neighbors of   | C24     | Check        |
| PLAT242_ALERT_2_C | Low 'MainMol' Ueq as Compared to Neighbors of    | C8      | Check        |
| PLAT242_ALERT_2_C | Low 'MainMol' Ueq as Compared to Neighbors of    | C25     | Check        |
| PLAT340_ALERT_3_C | Low Bond Precision on C-C Bonds .....            | 0.00546 | Ang.         |
| PLAT413_ALERT_2_C | Short Inter XH3 .. XHn H36 ..H43 .               | 2.06    | Ang.         |
|                   | 1+y,1-x+y,-1/6+z =                               | 3_664   | Check        |
| PLAT767_ALERT_4_C | INS Embedded LIST 6 Instruction Should be LIST 4 |         | Please Check |
| PLAT767_ALERT_4_C | INS Embedded LIST 6 Instruction Should be LIST 4 |         | Please Check |
| PLAT911_ALERT_3_C | Missing FCF Refl Between Thmin & STh/L= 0.600    | 3       | Report       |
| PLAT987_ALERT_1_C | The Flack x is >> 0 - Do a BASF/TWIN Refinement  |         | Please Check |

---

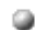

### Alert level G

|                   |                                                            |           |             |
|-------------------|------------------------------------------------------------|-----------|-------------|
| PLAT007_ALERT_5_G | Number of Unrefined Donor-H Atoms .....                    | 2         | Report      |
| PLAT033_ALERT_4_G | Flack x Value Deviates > 3.0 * sigma from Zero .           | 0.024     | Note        |
| PLAT112_ALERT_2_G | ADDSYM Detects New (Pseudo) Symm. Elem                     | 2         | 100 %Fit    |
| PLAT112_ALERT_2_G | ADDSYM Detects New (Pseudo) Symm. Elem                     | 2         | 100 %Fit    |
| PLAT112_ALERT_2_G | ADDSYM Detects New (Pseudo) Symm. Elem                     | 2         | 100 %Fit    |
| PLAT112_ALERT_2_G | ADDSYM Detects New (Pseudo) Symm. Elem                     | 2         | 100 %Fit    |
| PLAT112_ALERT_2_G | ADDSYM Detects New (Pseudo) Symm. Elem                     | 2         | 100 %Fit    |
| PLAT112_ALERT_2_G | ADDSYM Detects New (Pseudo) Symm. Elem                     | 2         | 100 %Fit    |
| PLAT113_ALERT_2_G | ADDSYM Suggests Possible Pseudo/New Space Group            | P6122     | Check       |
|                   | Check Model Parameter Symmetry for Reflection Data Support |           |             |
| PLAT301_ALERT_3_G | Main Residue Disorder .....                                | (Resd 1 ) | 5% Note     |
| PLAT301_ALERT_3_G | Main Residue Disorder .....                                | (Resd 2 ) | 5% Note     |
| PLAT412_ALERT_2_G | Short Intra XH3 .. XHn H6 ..H9BB .                         | 2.08      | Ang.        |
|                   | x,y,z =                                                    | 1_555     | Check       |
| PLAT412_ALERT_2_G | Short Intra XH3 .. XHn H13 ..H9BA .                        | 1.90      | Ang.        |
|                   | x,y,z =                                                    | 1_555     | Check       |
| PLAT412_ALERT_2_G | Short Intra XH3 .. XHn H26A ..H35 .                        | 2.03      | Ang.        |
|                   | x,y,z =                                                    | 1_555     | Check       |
| PLAT412_ALERT_2_G | Short Intra XH3 .. XHn H26C ..H43 .                        | 2.04      | Ang.        |
|                   | x,y,z =                                                    | 1_555     | Check       |
| PLAT720_ALERT_4_G | Number of Unusual/Non-Standard Labels .....                | 6         | Note        |
| PLAT791_ALERT_4_G | Model has Chirality at C2 (Sohnke SpGr)                    |           | S Verify    |
| PLAT791_ALERT_4_G | Model has Chirality at C3 (Sohnke SpGr)                    |           | R Verify    |
| PLAT791_ALERT_4_G | Model has Chirality at C4 (Sohnke SpGr)                    |           | R Verify    |
| PLAT791_ALERT_4_G | Model has Chirality at C5 (Sohnke SpGr)                    |           | S Verify    |
| PLAT791_ALERT_4_G | Model has Chirality at C12 (Sohnke SpGr)                   |           | R Verify    |
| PLAT791_ALERT_4_G | Model has Chirality at C19 (Sohnke SpGr)                   |           | S Verify    |
| PLAT791_ALERT_4_G | Model has Chirality at C20 (Sohnke SpGr)                   |           | R Verify    |
| PLAT791_ALERT_4_G | Model has Chirality at C21 (Sohnke SpGr)                   |           | R Verify    |
| PLAT791_ALERT_4_G | Model has Chirality at C22 (Sohnke SpGr)                   |           | S Verify    |
| PLAT791_ALERT_4_G | Model has Chirality at C30 (Sohnke SpGr)                   |           | R Verify    |
| PLAT883_ALERT_1_G | No Info/Value for _atom_sites_solution_primary .           |           | Please Do ! |
| PLAT913_ALERT_3_G | Missing # of Very Strong Reflections in FCF ....           | 2         | Note        |

|                   |                                                  |              |
|-------------------|--------------------------------------------------|--------------|
| PLAT933_ALERT_2_G | Number of HKL-OMIT Records in Embedded .res File | 1 Note       |
| PLAT965_ALERT_2_G | The SHELXL WEIGHT Optimisation has not Converged | Please Check |
| PLAT978_ALERT_2_G | Number C-C Bonds with Positive Residual Density. | 14 Info      |

---

0 **ALERT level A** = Most likely a serious problem - resolve or explain  
0 **ALERT level B** = A potentially serious problem, consider carefully  
13 **ALERT level C** = Check. Ensure it is not caused by an omission or oversight  
31 **ALERT level G** = General information/check it is not something unexpected

2 ALERT type 1 CIF construction/syntax error, inconsistent or missing data  
21 ALERT type 2 Indicator that the structure model may be wrong or deficient  
6 ALERT type 3 Indicator that the structure quality may be low  
14 ALERT type 4 Improvement, methodology, query or suggestion  
1 ALERT type 5 Informative message, check

---

It is advisable to attempt to resolve as many as possible of the alerts in all categories. Often the minor alerts point to easily fixed oversights, errors and omissions in your CIF or refinement strategy, so attention to these fine details can be worthwhile. In order to resolve some of the more serious problems it may be necessary to carry out additional measurements or structure refinements. However, the purpose of your study may justify the reported deviations and the more serious of these should normally be commented upon in the discussion or experimental section of a paper or in the "special\_details" fields of the CIF. checkCIF was carefully designed to identify outliers and unusual parameters, but every test has its limitations and alerts that are not important in a particular case may appear. Conversely, the absence of alerts does not guarantee there are no aspects of the results needing attention. It is up to the individual to critically assess their own results and, if necessary, seek expert advice.

### Publication of your CIF in IUCr journals

A basic structural check has been run on your CIF. These basic checks will be run on all CIFs submitted for publication in IUCr journals (*Acta Crystallographica*, *Journal of Applied Crystallography*, *Journal of Synchrotron Radiation*); however, if you intend to submit to *Acta Crystallographica Section C* or *E* or *IUCrData*, you should make sure that full publication checks are run on the final version of your CIF prior to submission.

### Publication of your CIF in other journals

Please refer to the *Notes for Authors* of the relevant journal for any special instructions relating to CIF submission.

Datablock t - ellipsoid plot

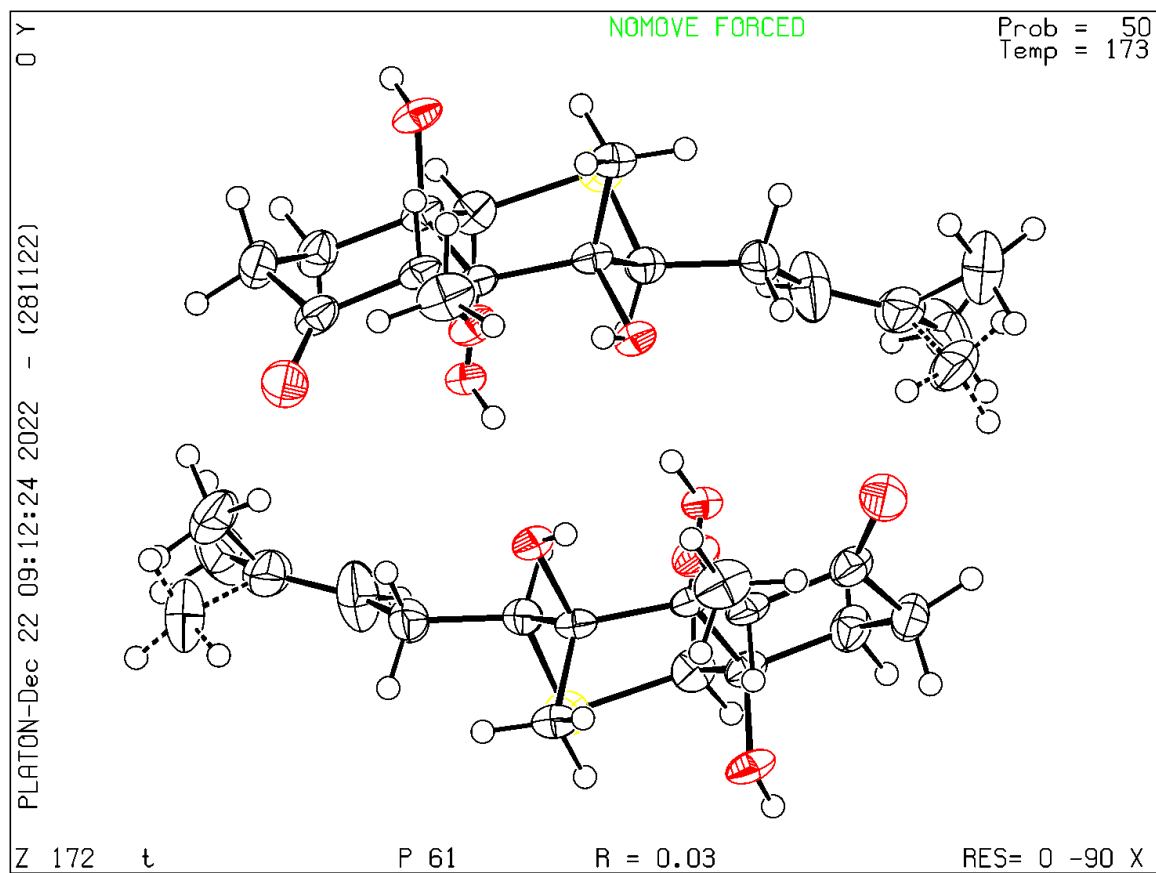

Supplement: Additional file 2 [file 1860-5397-20-42-S2.zip]
