# Supplementary material for: Pseudallenes A and B, new sulfur-containing ovalicin sesquiterpenoid derivatives with antimicrobial activity from the deep-sea cold seep sediment-derived fungus Pseudallescheria boydii CS-793
Source: publisher site journal article supplement (doi:10.3762/bjoc.20.42), 2024-02-28

## checkCIF/PLATON report

Structure factors have been supplied for datablock(s) t\_a

THIS REPORT IS FOR GUIDANCE ONLY. IF USED AS PART OF A REVIEW PROCEDURE FOR PUBLICATION, IT SHOULD NOT REPLACE THE EXPERTISE OF AN EXPERIENCED CRYSTALLOGRAPHIC REFEREE.

No syntax errors found.      CIF dictionary      Interpreting this report

### Datablock: t\_a

---

Bond precision:      C-C = 0.0072 Å      Wavelength=1.54178

Cell:                      a=15.0176(3)              b=24.2644(4)              c=29.3542(5)  
                                alpha=90              beta=90              gamma=90

Temperature:              173 K

|                        | Calculated                    | Reported                      |
|------------------------|-------------------------------|-------------------------------|
| Volume                 | 10696.5(3)                    | 10696.5(3)                    |
| Space group            | P 21 21 21                    | P 21 21 21                    |
| Hall group             | P 2ac 2ab                     | P 2ac 2ab                     |
| Moiety formula         | C16 H26 O5 S, 5(C16 H28 O5 S) | C16 H26 O5 S, 5(C16 H28 O5 S) |
| Sum formula            | C96 H166 O30 S6               | C96 H166 O30 S6               |
| Mr                     | 1992.65                       | 1992.64                       |
| Dx, g cm <sup>-3</sup> | 1.237                         | 1.237                         |
| Z                      | 4                             | 4                             |
| Mu (mm <sup>-1</sup> ) | 1.783                         | 1.783                         |
| F000                   | 4312.0                        | 4312.0                        |
| F000'                  | 4332.48                       |                               |
| h, k, lmax             | 18, 29, 35                    | 17, 29, 35                    |
| Nref                   | 19580[ 10635]                 | 19396                         |
| Tmin, Tmax             | 0.762, 0.807                  | 0.568, 0.753                  |
| Tmin'                  | 0.691                         |                               |

Correction method= # Reported T Limits: Tmin=0.568 Tmax=0.753  
AbsCorr = MULTI-SCAN

Data completeness= 1.82/0.99      Theta(max)= 68.182

R(reflections)= 0.0512( 17030)

wR2(reflections)=  
0.1430( 19396)

S = 1.000

Npar= 1252

---

The following ALERTS were generated. Each ALERT has the format

**test-name\_ALERT\_alert-type\_alert-level.**

Click on the hyperlinks for more details of the test.

---

### ● Alert level C

|                   |                                                    |         |        |
|-------------------|----------------------------------------------------|---------|--------|
| PLAT094_ALERT_2_C | Ratio of Maximum / Minimum Residual Density ....   | 2.10    | Report |
| PLAT220_ALERT_2_C | NonSolvent Resd 1 C Ueq(max)/Ueq(min) Range        | 4.4     | Ratio  |
| PLAT220_ALERT_2_C | NonSolvent Resd 2 C Ueq(max)/Ueq(min) Range        | 3.2     | Ratio  |
| PLAT220_ALERT_2_C | NonSolvent Resd 5 C Ueq(max)/Ueq(min) Range        | 3.2     | Ratio  |
| PLAT222_ALERT_3_C | NonSolvent Resd 1 H Uiso(max)/Uiso(min) Range      | 5.0     | Ratio  |
| PLAT230_ALERT_2_C | Hirshfeld Test Diff for C12 --C13                  | 5.2     | s.u.   |
| PLAT234_ALERT_4_C | Large Hirshfeld Difference C76 --C77A              | 0.16    | Ang.   |
| PLAT241_ALERT_2_C | High 'MainMol' Ueq as Compared to Neighbors of C76 | Check   |        |
| PLAT242_ALERT_2_C | Low 'MainMol' Ueq as Compared to Neighbors of C78  | Check   |        |
| PLAT242_ALERT_2_C | Low 'MainMol' Ueq as Compared to Neighbors of C14  | Check   |        |
| PLAT242_ALERT_2_C | Low 'MainMol' Ueq as Compared to Neighbors of C30  | Check   |        |
| PLAT242_ALERT_2_C | Low 'MainMol' Ueq as Compared to Neighbors of C62  | Check   |        |
| PLAT340_ALERT_3_C | Low Bond Precision on C-C Bonds .....              | 0.00718 | Ang.   |
| PLAT411_ALERT_2_C | Short Inter H...H Contact H35B ..H83A              | 2.12    | Ang.   |
|                   | 1+x,y,z =                                          | 1_655   | Check  |
| PLAT413_ALERT_2_C | Short Inter XH3 .. XHn H50B ..H79A                 | 2.06    | Ang.   |
|                   | -x,1/2+y,1/2-z =                                   | 3_555   | Check  |
| PLAT601_ALERT_2_C | Unit Cell Contains Solvent Accessible VOIDS of .   | 47      | Ang**3 |
| PLAT767_ALERT_4_C | INS Embedded LIST 6 Instruction Should be LIST 4   | Please  | Check  |
| PLAT911_ALERT_3_C | Missing FCF Refl Between Thmin & STh/L= 0.600      | 26      | Report |
| PLAT975_ALERT_2_C | Check Calcd Resid. Dens. 0.97Ang From C68          | 0.42    | eA-3   |
| PLAT987_ALERT_1_C | The Flack x is >> 0 - Do a BASF/TWIN Refinement    | Please  | Check  |

---

### ● Alert level G

|                   |                                                  |       |        |
|-------------------|--------------------------------------------------|-------|--------|
| PLAT007_ALERT_5_G | Number of Unrefined Donor-H Atoms .....          | 22    | Report |
| PLAT033_ALERT_4_G | Flack x Value Deviates > 3.0 * sigma from Zero . | 0.019 | Note   |
| PLAT301_ALERT_3_G | Main Residue Disorder .....(Resd 1 )             | 5%    | Note   |
| PLAT343_ALERT_2_G | Unusual sp? Angle Range in Main Residue for      | C68   | Check  |
| PLAT367_ALERT_2_G | Long? C(sp?)-C(sp?) Bond C67 - C68               | 1.52  | Ang.   |
| PLAT367_ALERT_2_G | Long? C(sp?)-C(sp?) Bond C68 - C69               | 1.54  | Ang.   |
| PLAT367_ALERT_2_G | Long? C(sp?)-C(sp?) Bond C78 - C79               | 1.62  | Ang.   |
| PLAT773_ALERT_2_G | Check long C-C Bond in CIF: C77A --C79           | 1.89  | Ang.   |
| PLAT779_ALERT_4_G | Suspect or Irrelevant (Bond) Angle(s) in CIF ... | 41.40 | Deg.   |
|                   | C78 -C79 -C77A 1_555 1_555 1_555 .....           | # 181 | Check  |
| PLAT791_ALERT_4_G | Model has Chirality at C1 (Sohnke SpGr)          | R     | Verify |
| PLAT791_ALERT_4_G | Model has Chirality at C2 (Sohnke SpGr)          | R     | Verify |
| PLAT791_ALERT_4_G | Model has Chirality at C3 (Sohnke SpGr)          | R     | Verify |
| PLAT791_ALERT_4_G | Model has Chirality at C6 (Sohnke SpGr)          | R     | Verify |
| PLAT791_ALERT_4_G | Model has Chirality at C8 (Sohnke SpGr)          | S     | Verify |
| PLAT791_ALERT_4_G | Model has Chirality at C9 (Sohnke SpGr)          | R     | Verify |
| PLAT791_ALERT_4_G | Model has Chirality at C17 (Sohnke SpGr)         | R     | Verify |
| PLAT791_ALERT_4_G | Model has Chirality at C18 (Sohnke SpGr)         | R     | Verify |
| PLAT791_ALERT_4_G | Model has Chirality at C19 (Sohnke SpGr)         | R     | Verify |
| PLAT791_ALERT_4_G | Model has Chirality at C22 (Sohnke SpGr)         | R     | Verify |
| PLAT791_ALERT_4_G | Model has Chirality at C24 (Sohnke SpGr)         | S     | Verify |
| PLAT791_ALERT_4_G | Model has Chirality at C25 (Sohnke SpGr)         | R     | Verify |
| PLAT791_ALERT_4_G | Model has Chirality at C33 (Sohnke SpGr)         | R     | Verify |
| PLAT791_ALERT_4_G | Model has Chirality at C36 (Sohnke SpGr)         | R     | Verify |
| PLAT791_ALERT_4_G | Model has Chirality at C37 (Sohnke SpGr)         | R     | Verify |

|                                                                    |               |              |
|--------------------------------------------------------------------|---------------|--------------|
| PLAT791_ALERT_4_G Model has Chirality at C38                       | (Sohnke SpGr) | R Verify     |
| PLAT791_ALERT_4_G Model has Chirality at C39                       | (Sohnke SpGr) | R Verify     |
| PLAT791_ALERT_4_G Model has Chirality at C40                       | (Sohnke SpGr) | S Verify     |
| PLAT791_ALERT_4_G Model has Chirality at C49                       | (Sohnke SpGr) | R Verify     |
| PLAT791_ALERT_4_G Model has Chirality at C52                       | (Sohnke SpGr) | R Verify     |
| PLAT791_ALERT_4_G Model has Chirality at C53                       | (Sohnke SpGr) | R Verify     |
| PLAT791_ALERT_4_G Model has Chirality at C54                       | (Sohnke SpGr) | R Verify     |
| PLAT791_ALERT_4_G Model has Chirality at C56                       | (Sohnke SpGr) | S Verify     |
| PLAT791_ALERT_4_G Model has Chirality at C57                       | (Sohnke SpGr) | R Verify     |
| PLAT791_ALERT_4_G Model has Chirality at C65                       | (Sohnke SpGr) | R Verify     |
| PLAT791_ALERT_4_G Model has Chirality at C69                       | (Sohnke SpGr) | R Verify     |
| PLAT791_ALERT_4_G Model has Chirality at C70                       | (Sohnke SpGr) | R Verify     |
| PLAT791_ALERT_4_G Model has Chirality at C71                       | (Sohnke SpGr) | R Verify     |
| PLAT791_ALERT_4_G Model has Chirality at C81                       | (Sohnke SpGr) | R Verify     |
| PLAT791_ALERT_4_G Model has Chirality at C84                       | (Sohnke SpGr) | R Verify     |
| PLAT791_ALERT_4_G Model has Chirality at C85                       | (Sohnke SpGr) | R Verify     |
| PLAT791_ALERT_4_G Model has Chirality at C86                       | (Sohnke SpGr) | R Verify     |
| PLAT791_ALERT_4_G Model has Chirality at C87                       | (Sohnke SpGr) | R Verify     |
| PLAT791_ALERT_4_G Model has Chirality at C88                       | (Sohnke SpGr) | S Verify     |
| PLAT883_ALERT_1_G No Info/Value for _atom_sites_solution_primary . |               | Please Do !  |
| PLAT912_ALERT_4_G Missing # of FCF Reflections Above STh/L= 0.600  |               | 17 Note      |
| PLAT913_ALERT_3_G Missing # of Very Strong Reflections in FCF .... |               | 2 Note       |
| PLAT933_ALERT_2_G Number of HKL-OMIT Records in Embedded .res File |               | 4 Note       |
| PLAT965_ALERT_2_G The SHELXL WEIGHT Optimisation has not Converged |               | Please Check |
| PLAT978_ALERT_2_G Number C-C Bonds with Positive Residual Density. |               | 0 Info       |
| PLAT992_ALERT_5_G Repd & Actual _reflns_number_gt Values Differ by |               | 4 Check      |

---

0 **ALERT level A** = Most likely a serious problem - resolve or explain  
 0 **ALERT level B** = A potentially serious problem, consider carefully  
 20 **ALERT level C** = Check. Ensure it is not caused by an omission or oversight  
 50 **ALERT level G** = General information/check it is not something unexpected

2 ALERT type 1 CIF construction/syntax error, inconsistent or missing data  
 22 ALERT type 2 Indicator that the structure model may be wrong or deficient  
 5 ALERT type 3 Indicator that the structure quality may be low  
 39 ALERT type 4 Improvement, methodology, query or suggestion  
 2 ALERT type 5 Informative message, check

---

It is advisable to attempt to resolve as many as possible of the alerts in all categories. Often the minor alerts point to easily fixed oversights, errors and omissions in your CIF or refinement strategy, so attention to these fine details can be worthwhile. In order to resolve some of the more serious problems it may be necessary to carry out additional measurements or structure refinements. However, the purpose of your study may justify the reported deviations and the more serious of these should normally be commented upon in the discussion or experimental section of a paper or in the "special\_details" fields of the CIF. checkCIF was carefully designed to identify outliers and unusual parameters, but every test has its limitations and alerts that are not important in a particular case may appear. Conversely, the absence of alerts does not guarantee there are no aspects of the results needing attention. It is up to the individual to critically assess their own results and, if necessary, seek expert advice.

### **Publication of your CIF in IUCr journals**

A basic structural check has been run on your CIF. These basic checks will be run on all CIFs submitted for publication in IUCr journals (*Acta Crystallographica*, *Journal of Applied Crystallography*, *Journal of Synchrotron Radiation*); however, if you intend to submit to *Acta Crystallographica Section C* or *E* or *IUCrData*, you should make sure that full publication checks are run on the final version of your CIF prior to submission.

### **Publication of your CIF in other journals**

Please refer to the *Notes for Authors* of the relevant journal for any special instructions relating to CIF submission.

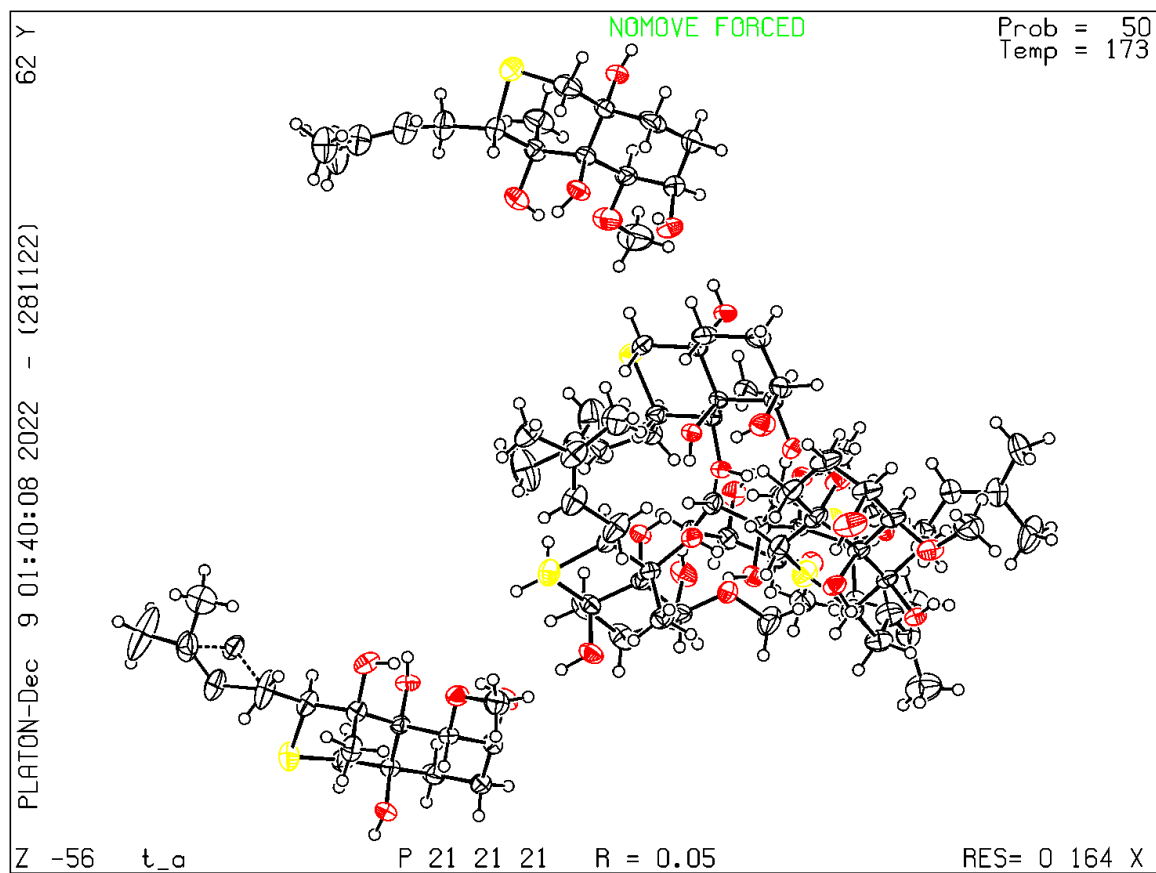

Supplement: Additional file 2 [file 1860-5397-20-42-S2.zip]
