# Supplementary material for: Pseudallenes A and B, new sulfur-containing ovalicin sesquiterpenoid derivatives with antimicrobial activity from the deep-sea cold seep sediment-derived fungus Pseudallescheria boydii CS-793
Source: publisher site journal article supplement (doi:10.3762/bjoc.20.42), 2024-02-28

## checkCIF/PLATON report

Structure factors have been supplied for datablock(s) t

THIS REPORT IS FOR GUIDANCE ONLY. IF USED AS PART OF A REVIEW PROCEDURE FOR PUBLICATION, IT SHOULD NOT REPLACE THE EXPERTISE OF AN EXPERIENCED CRYSTALLOGRAPHIC REFEREE.

No syntax errors found.      CIF dictionary      Interpreting this report

### Datablock: t

---

Bond precision:      C-C = 0.0047 Å      Wavelength=1.54178

Cell:                      a=6.5016(1)                      b=7.7295(2)                      c=17.5958(4)  
                              alpha=85.427(1)                      beta=81.799(1)                      gamma=65.151(1)  
Temperature:              173 K

|                        | Calculated   | Reported     |
|------------------------|--------------|--------------|
| Volume                 | 794.00(3)    | 794.00(3)    |
| Space group            | P 1          | P 1          |
| Hall group             | P 1          | P 1          |
| Moiety formula         | C15 H26 O5 S | C15 H26 O5 S |
| Sum formula            | C15 H26 O5 S | C15 H26 O5 S |
| Mr                     | 318.42       | 318.42       |
| Dx, g cm <sup>-3</sup> | 1.332        | 1.332        |
| Z                      | 2            | 2            |
| Mu (mm <sup>-1</sup> ) | 1.979        | 1.979        |
| F000                   | 344.0        | 344.0        |
| F000'                  | 345.67       |              |
| h, k, lmax             | 7, 9, 20     | 7, 9, 20     |
| Nref                   | 5612[ 2806]  | 5468         |
| Tmin, Tmax             | 0.735, 0.789 | 0.636, 0.753 |
| Tmin'                  | 0.667        |              |

Correction method= # Reported T Limits: Tmin=0.636 Tmax=0.753  
AbsCorr = MULTI-SCAN

Data completeness= 1.95/0.97      Theta(max)= 66.525

|                               |                   |
|-------------------------------|-------------------|
| R(reflections)= 0.0287( 5118) | wR2(reflections)= |
| S = 1.034                     | 0.0736( 5468)     |
| Npar= 415                     |                   |

---

The following ALERTS were generated. Each ALERT has the format

**test-name\_ALERT\_alert-type\_alert-level.**

Click on the hyperlinks for more details of the test.

---

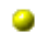

### Alert level C

|                   |                                                  |         |              |
|-------------------|--------------------------------------------------|---------|--------------|
| PLAT089_ALERT_3_C | Poor Data / Parameter Ratio (Zmax < 18) .....    | 6.76    | Note         |
| PLAT220_ALERT_2_C | NonSolvent Resd 1 C Ueq(max)/Ueq(min) Range      | 3.5     | Ratio        |
| PLAT220_ALERT_2_C | NonSolvent Resd 2 C Ueq(max)/Ueq(min) Range      | 3.8     | Ratio        |
| PLAT222_ALERT_3_C | NonSolvent Resd 1 H Uiso(max)/Uiso(min) Range    | 4.4     | Ratio        |
| PLAT222_ALERT_3_C | NonSolvent Resd 2 H Uiso(max)/Uiso(min) Range    | 4.8     | Ratio        |
| PLAT340_ALERT_3_C | Low Bond Precision on C-C Bonds .....            | 0.00473 | Ang.         |
| PLAT414_ALERT_2_C | Short Intra D-H..H-X H39 ..H48 .                 | 1.99    | Ang.         |
|                   | x,y,z =                                          | 1_555   | Check        |
| PLAT767_ALERT_4_C | INS Embedded LIST 6 Instruction Should be LIST 4 |         | Please Check |
| PLAT911_ALERT_3_C | Missing FCF Refl Between Thmin & STh/L= 0.595    | 3       | Report       |
| PLAT987_ALERT_1_C | The Flack x is >> 0 - Do a BASF/TWIN Refinement  |         | Please Check |

---

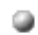

### Alert level G

|                   |                                                  |       |              |
|-------------------|--------------------------------------------------|-------|--------------|
| PLAT033_ALERT_4_G | Flack x Value Deviates > 3.0 * sigma from Zero . | 0.048 | Note         |
| PLAT154_ALERT_1_G | The s.u.'s on the Cell Angles are Equal ..(Note) | 0.001 | Degree       |
| PLAT791_ALERT_4_G | Model has Chirality at C5 (Sohnke SpGr)          |       | S Verify     |
| PLAT791_ALERT_4_G | Model has Chirality at C6 (Sohnke SpGr)          |       | R Verify     |
| PLAT791_ALERT_4_G | Model has Chirality at C7 (Sohnke SpGr)          |       | R Verify     |
| PLAT791_ALERT_4_G | Model has Chirality at C8 (Sohnke SpGr)          |       | R Verify     |
| PLAT791_ALERT_4_G | Model has Chirality at C12 (Sohnke SpGr)         |       | S Verify     |
| PLAT791_ALERT_4_G | Model has Chirality at C13 (Sohnke SpGr)         |       | R Verify     |
| PLAT791_ALERT_4_G | Model has Chirality at C20 (Sohnke SpGr)         |       | S Verify     |
| PLAT791_ALERT_4_G | Model has Chirality at C21 (Sohnke SpGr)         |       | R Verify     |
| PLAT791_ALERT_4_G | Model has Chirality at C22 (Sohnke SpGr)         |       | R Verify     |
| PLAT791_ALERT_4_G | Model has Chirality at C23 (Sohnke SpGr)         |       | R Verify     |
| PLAT791_ALERT_4_G | Model has Chirality at C29 (Sohnke SpGr)         |       | R Verify     |
| PLAT791_ALERT_4_G | Model has Chirality at C30 (Sohnke SpGr)         |       | S Verify     |
| PLAT883_ALERT_1_G | No Info/Value for _atom_sites_solution_primary . |       | Please Do !  |
| PLAT909_ALERT_3_G | Percentage of I>2sig(I) Data at Theta(Max) Still | 88%   | Note         |
| PLAT913_ALERT_3_G | Missing # of Very Strong Reflections in FCF .... | 2     | Note         |
| PLAT965_ALERT_2_G | The SHELXL WEIGHT Optimisation has not Converged |       | Please Check |
| PLAT978_ALERT_2_G | Number C-C Bonds with Positive Residual Density. | 8     | Info         |

---

0 **ALERT level A** = Most likely a serious problem - resolve or explain

0 **ALERT level B** = A potentially serious problem, consider carefully

10 **ALERT level C** = Check. Ensure it is not caused by an omission or oversight

19 **ALERT level G** = General information/check it is not something unexpected

3 ALERT type 1 CIF construction/syntax error, inconsistent or missing data

5 ALERT type 2 Indicator that the structure model may be wrong or deficient

7 ALERT type 3 Indicator that the structure quality may be low

14 ALERT type 4 Improvement, methodology, query or suggestion

0 ALERT type 5 Informative message, check

---

It is advisable to attempt to resolve as many as possible of the alerts in all categories. Often the minor alerts point to easily fixed oversights, errors and omissions in your CIF or refinement strategy, so attention to these fine details can be worthwhile. In order to resolve some of the more serious problems it may be necessary to carry out additional measurements or structure refinements. However, the purpose of your study may justify the reported deviations and the more serious of these should normally be commented upon in the discussion or experimental section of a paper or in the "special\_details" fields of the CIF. checkCIF was carefully designed to identify outliers and unusual parameters, but every test has its limitations and alerts that are not important in a particular case may appear. Conversely, the absence of alerts does not guarantee there are no aspects of the results needing attention. It is up to the individual to critically assess their own results and, if necessary, seek expert advice.

### **Publication of your CIF in IUCr journals**

A basic structural check has been run on your CIF. These basic checks will be run on all CIFs submitted for publication in IUCr journals (*Acta Crystallographica*, *Journal of Applied Crystallography*, *Journal of Synchrotron Radiation*); however, if you intend to submit to *Acta Crystallographica Section C* or *E* or *IUCrData*, you should make sure that full publication checks are run on the final version of your CIF prior to submission.

### **Publication of your CIF in other journals**

Please refer to the *Notes for Authors* of the relevant journal for any special instructions relating to CIF submission.

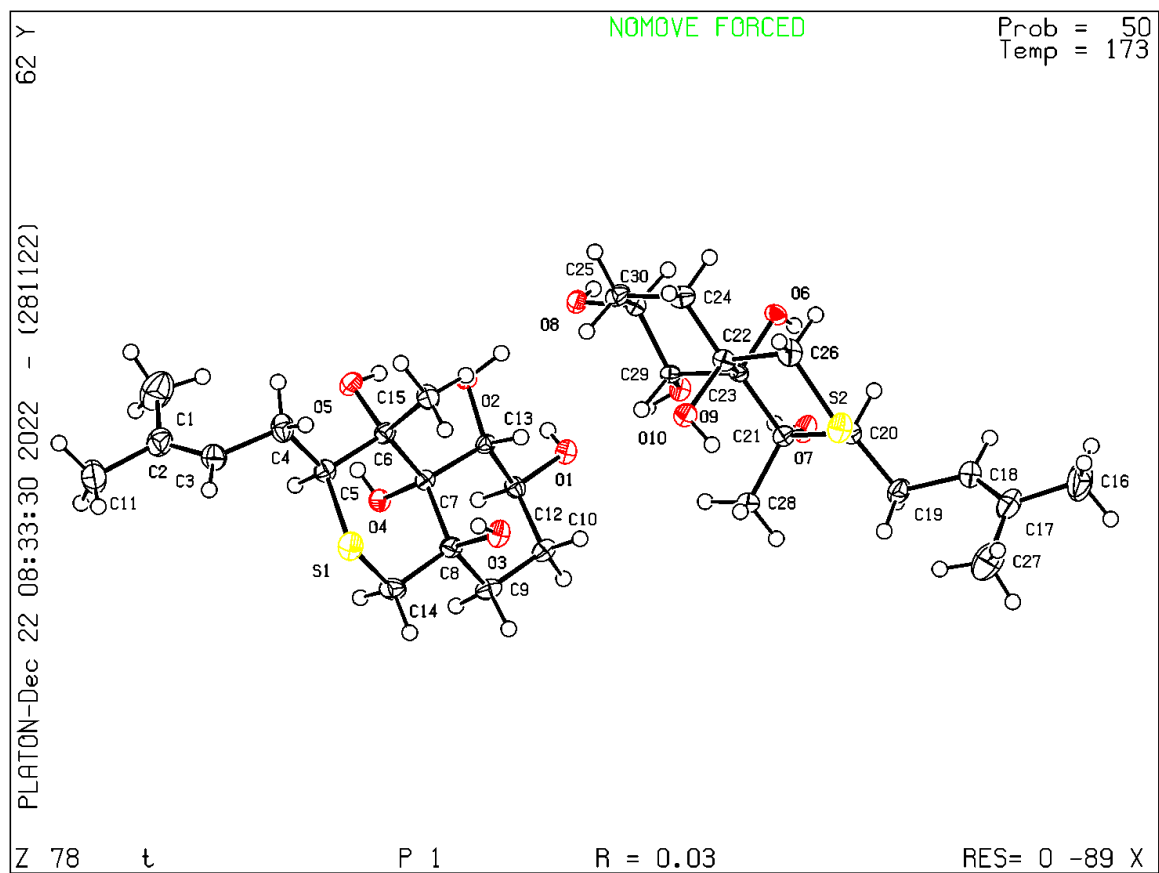

Supplement: Additional file 2 [file 1860-5397-20-42-S2.zip]
