# Supplementary material for: Pseudallenes A and B, new sulfur-containing ovalicin sesquiterpenoid derivatives with antimicrobial activity from the deep-sea cold seep sediment-derived fungus Pseudallescheria boydii CS-793
Source: publisher site journal article supplement (doi:10.3762/bjoc.20.42), 2024-02-28
Supplement: Additional file 1 [file 1860-5397-20-42-S1.pdf]

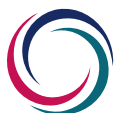

## Supporting Information

for

**Pseudallenes A and B, new sulfur-containing ovalicin sesquiterpenoid derivatives with antimicrobial activity from the deep-sea cold seep sediment-derived fungus *Pseudallescheria boydii* CS-793**

Zhen Ying, Xiao-Ming Li, Sui-Qun Yang, Hong-Lei Li, Xin Li, Bin-Gui Wang and Ling-Hong Meng

*Beilstein J. Org. Chem.* **2024**, *20*, 470–478. doi:10.3762/bjoc.20.42

**Selected 1D and 2D NMR, and HRESIMS spectra of compounds 1 and 2, and 1D NMR spectra of compounds 3–5**

**Figure S1.**  $^1\text{H}$  NMR (500 MHz,  $\text{DMSO-}d_6$ ) spectrum of compound **1**;

**Figure S2.**  $^{13}\text{C}$  NMR (125 MHz,  $\text{DMSO-}d_6$ ) and DEPT spectra of compound **1**;

**Figure S3.** COSY spectrum of compound **1**;

**Figure S4.** HSQC spectrum of compound **1**;

**Figure S5.** HMBC spectrum of compound **1**;

**Figure S6.** NOESY spectrum of compound **1**;

**Figure S7.** LC-MS spectrum of compound **1**;

**Figure S8.**  $^1\text{H}$  NMR (500 MHz,  $\text{DMSO-}d_6$ ) spectrum of compound **2**;

**Figure S9.**  $^{13}\text{C}$  NMR (125 MHz,  $\text{DMSO-}d_6$ ) and DEPT spectra of compound **2**;

**Figure S10.** COSY spectrum of compound **2**;

**Figure S11.** HSQC spectrum of compound **2**;

**Figure S12.** HMBC spectrum of compound **2**;

**Figure S13.** NOESY spectrum of compound **2**;

**Figure S14.** LC-MS spectrum of compound **2**;

**Figure S15.**  $^1\text{H}$  NMR (500 MHz,  $\text{CDCl}_3$ ) spectrum of compound **3**;

**Figure S16.**  $^{13}\text{C}$  NMR (125 MHz,  $\text{CDCl}_3$ ) and DEPT spectra of compound **3**;

**Figure S17.** COSY spectrum of compound **3**;

**Figure S18.** HSQC spectrum of compound **3**;

**Figure S19.** HMBC spectrum of compound **3**;

**Figure S20.**  $^1\text{H}$  NMR (500 MHz,  $\text{DMSO-}d_6$ ) spectrum of compound **4**;

**Figure S21.**  $^{13}\text{C}$  NMR (125 MHz,  $\text{DMSO-}d_6$ ) and DEPT spectra of compound **4**.

**Figure S22.**  $^1\text{H}$  NMR (500 MHz,  $\text{DMSO-}d_6$ ) spectrum of compound **5**;

**Figure S23.**  $^{13}\text{C}$  NMR (125 MHz,  $\text{DMSO-}d_6$ ) and DEPT spectra of compound **5**.

**Table S1.** Crystal data and structure refinement for compounds **1–3**.

**Table S2.**  $^1\text{H}$ ,  $^{13}\text{C}$ , COSY, HMBC Spectroscopic Data for Compound **1** in  $\text{DMSO-}d_6$ .

**Table S3.**  $^1\text{H}$ ,  $^{13}\text{C}$ , COSY, HMBC Spectroscopic Data for Compound **2** in  $\text{DMSO-}d_6$ .

**Table S4.**  $^1\text{H}$ ,  $^{13}\text{C}$ , COSY, HMBC Spectroscopic Data for Compound **3** in  $\text{CDCl}_3$ .

**Figure S1.**  $^1\text{H}$  NMR (500 MHz,  $\text{DMSO}-d_6$ ) spectrum of compound **1**;

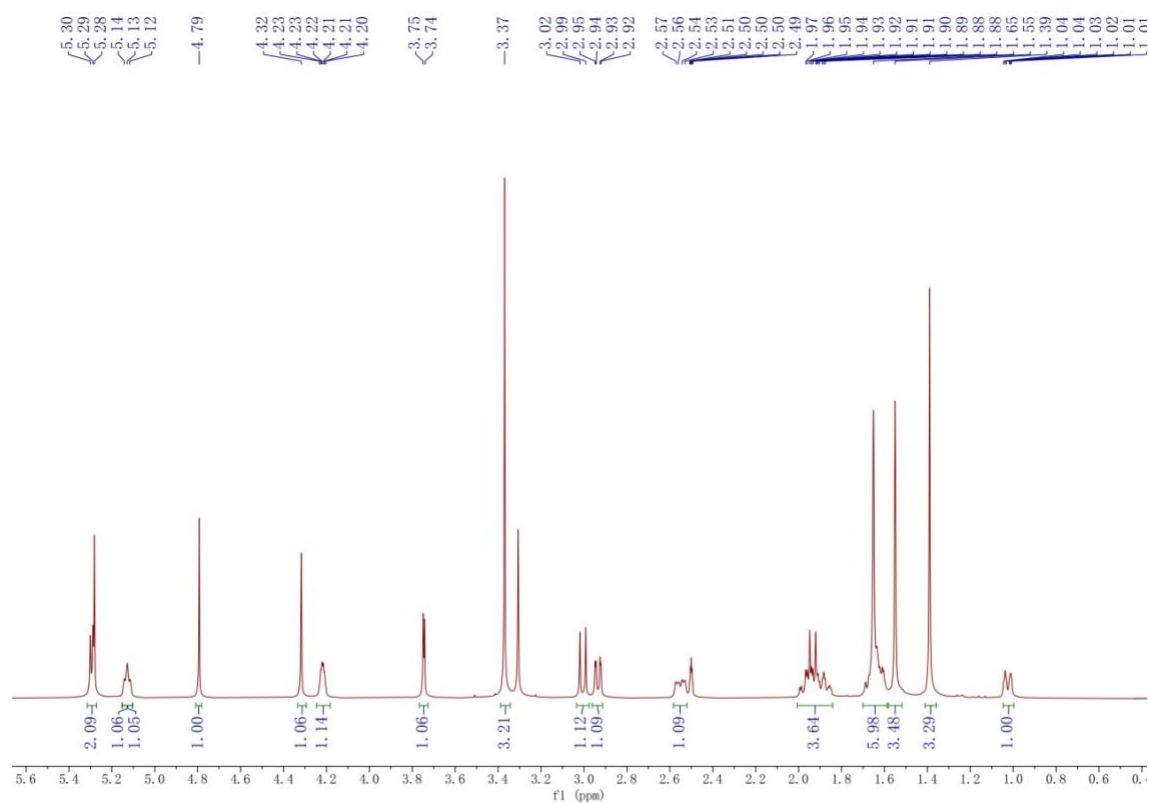

**Figure S2.**  $^{13}\text{C}$  NMR (125 MHz,  $\text{DMSO}-d_6$ ) and DEPT spectra of compound **1**;

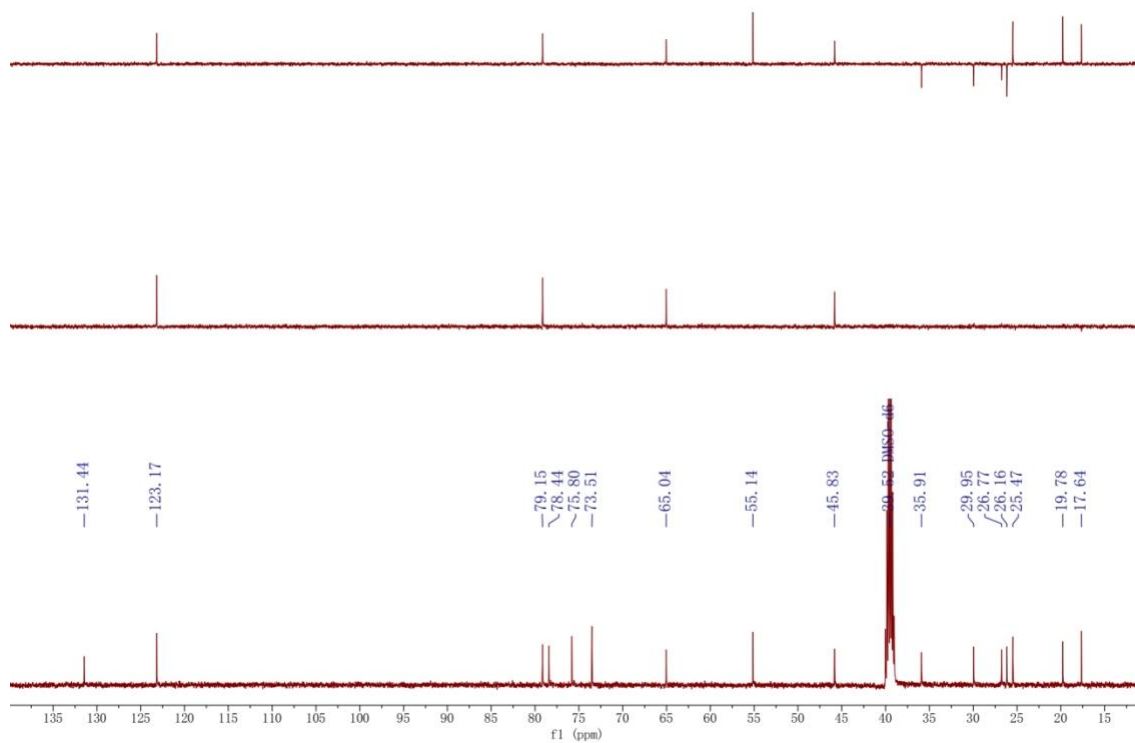

**Figure S3.** COSY spectrum of compound 1;

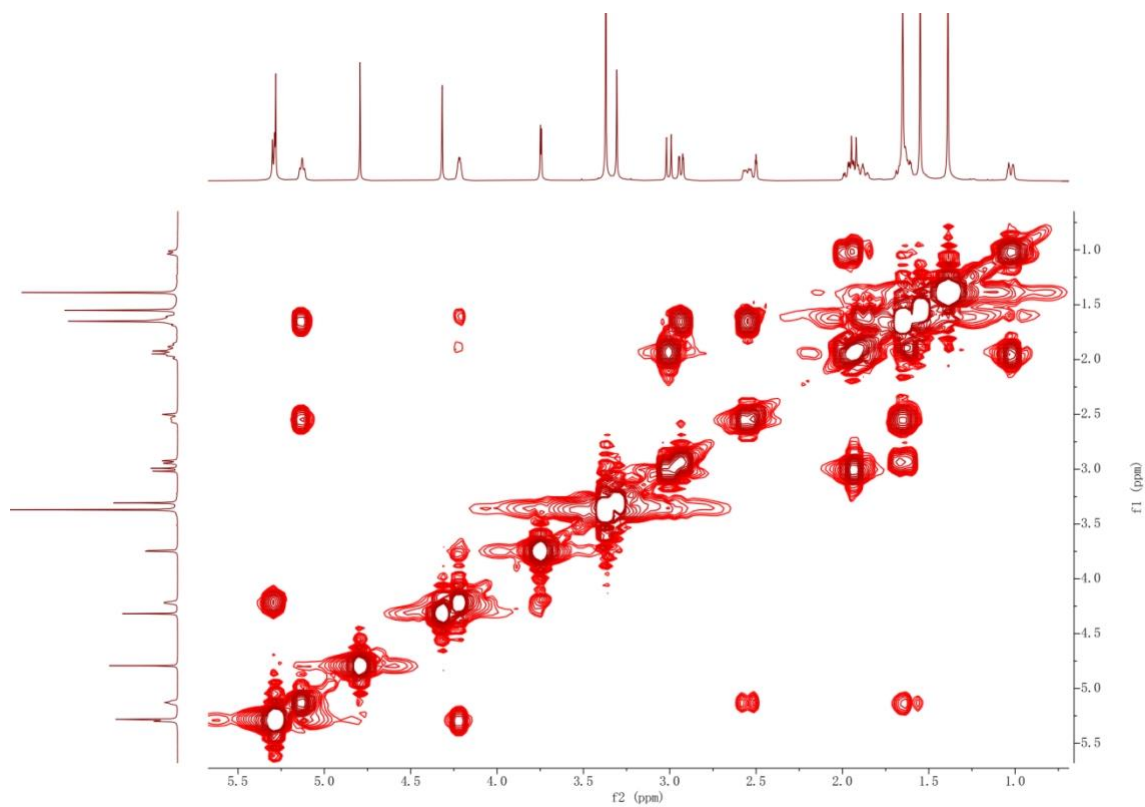

**Figure S4.** HSQC spectrum of compound 1;

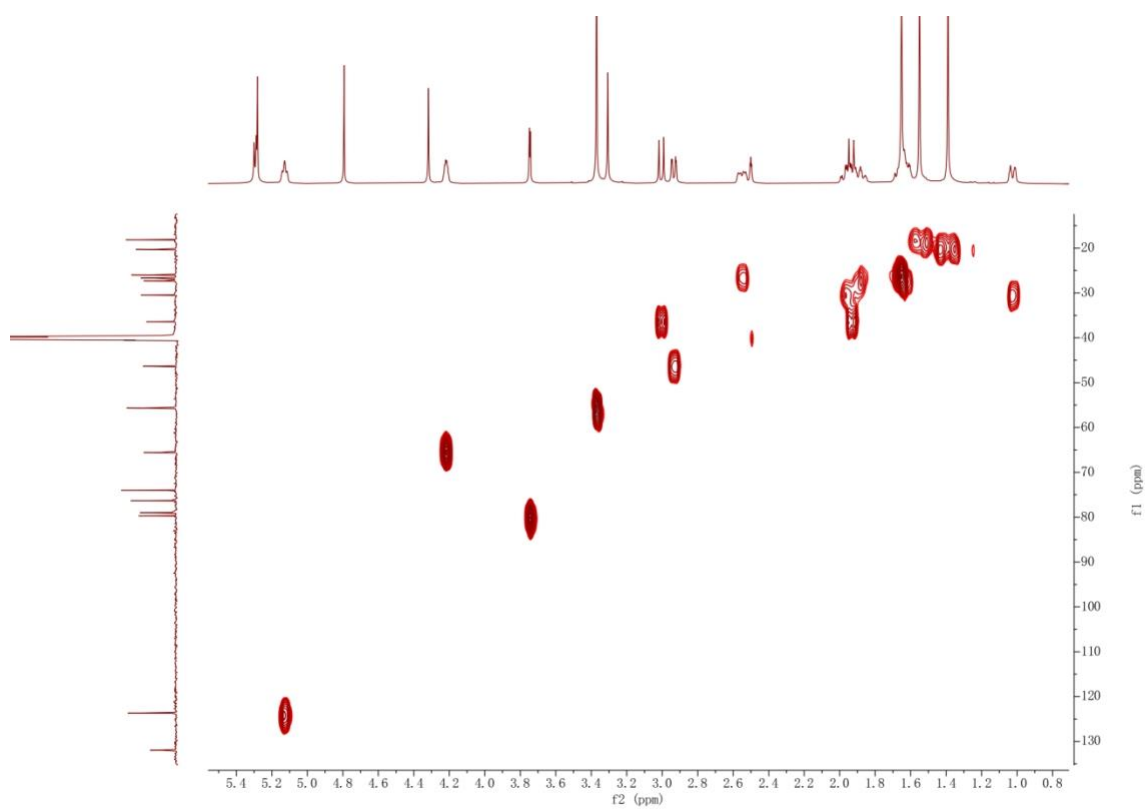

**Figure S5.** HMBC spectrum of compound **1**;

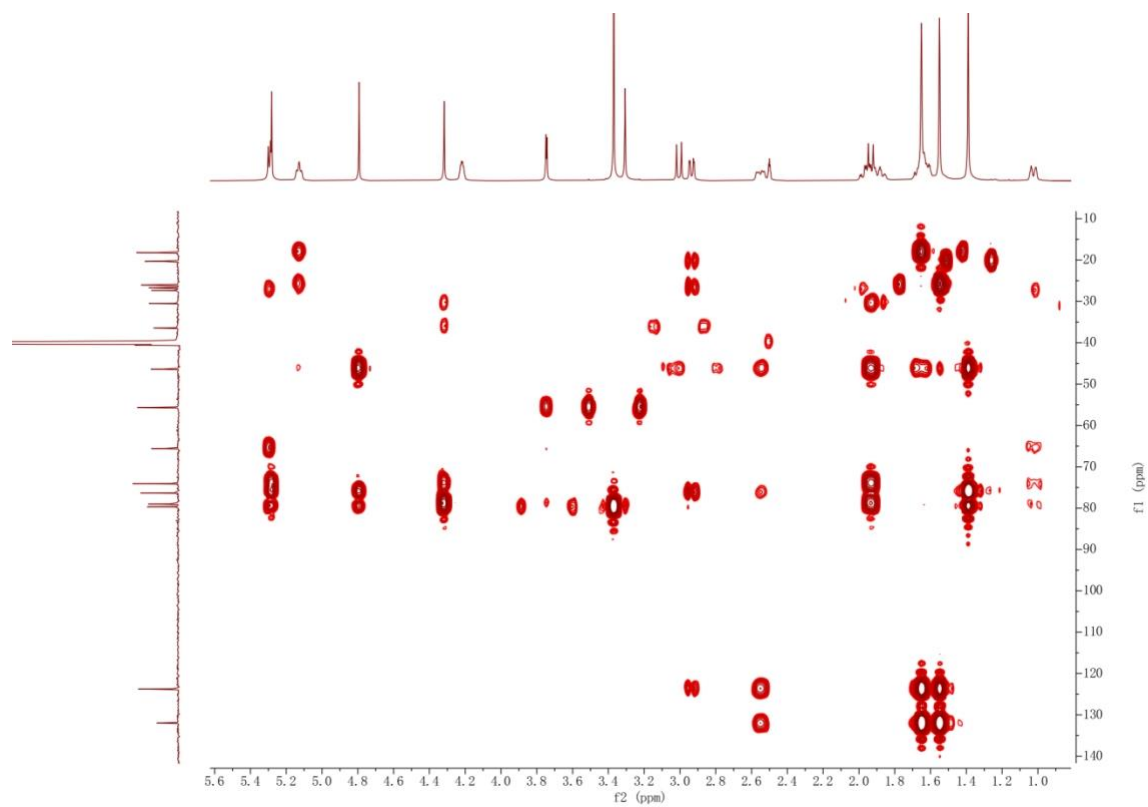

**Figure S6.** NOESY spectrum of compound **1**;

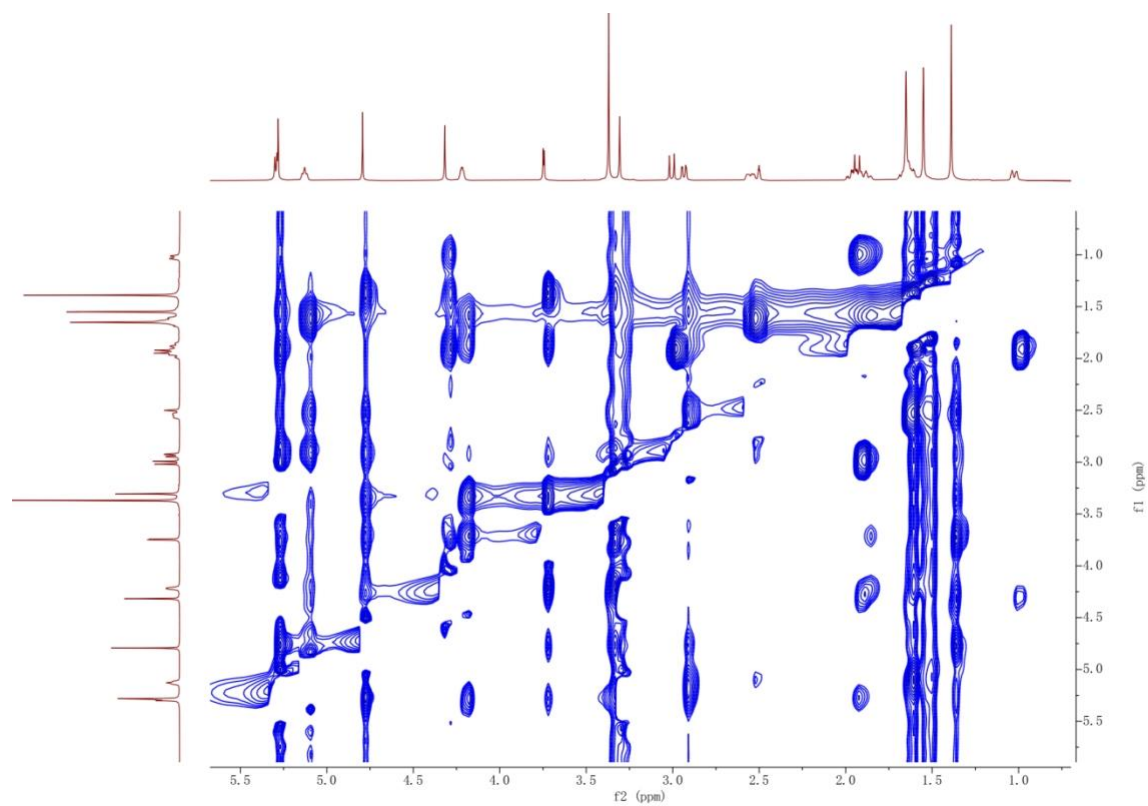

**Figure S7.** LC-MS spectrum of compound **1**;

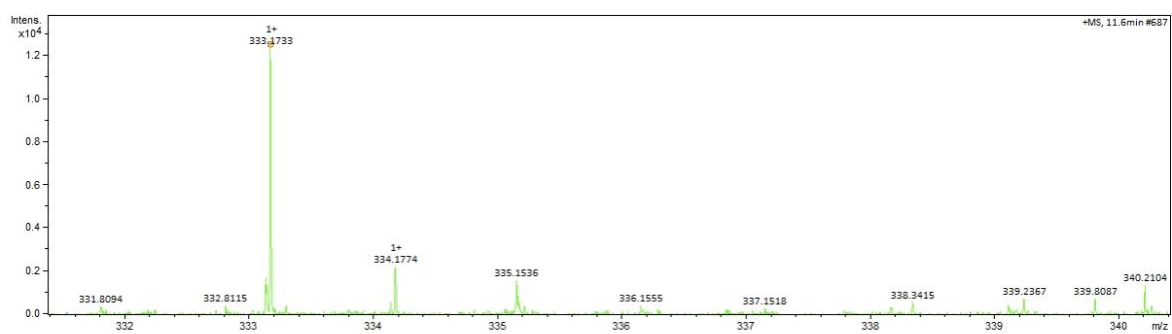

**Figure S8.**  $^1\text{H}$  NMR (500 MHz,  $\text{DMSO-}d_6$ ) spectrum of compound **2**;

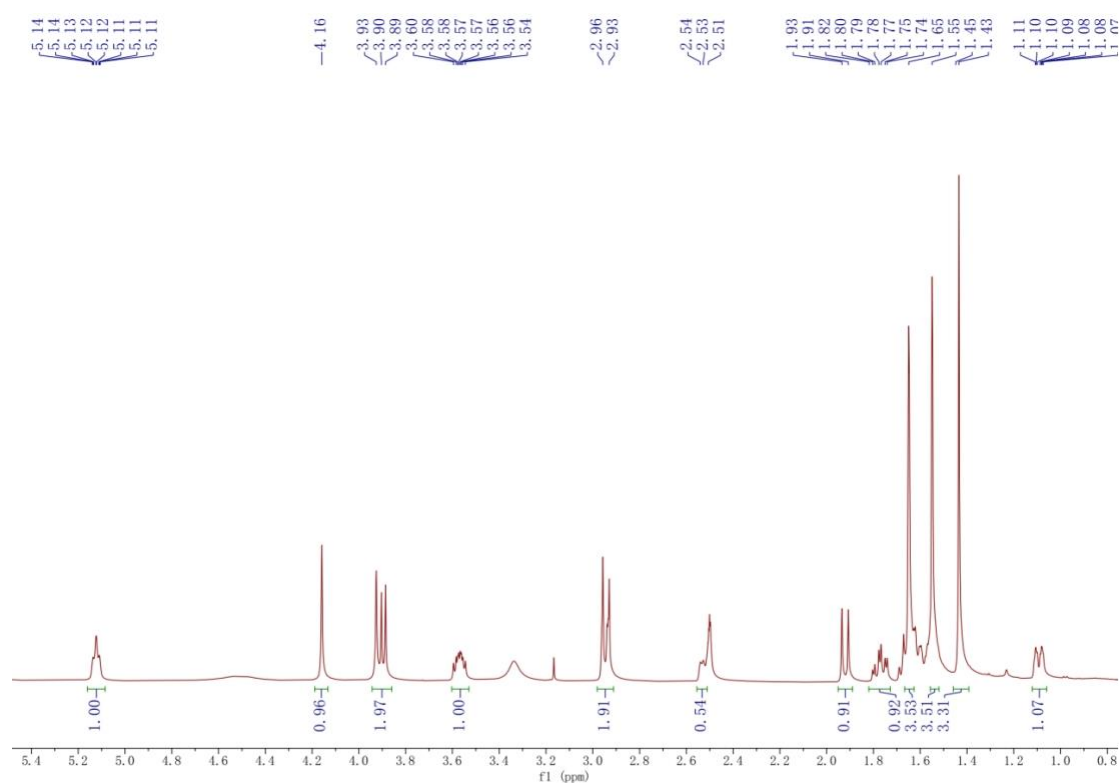

**Figure S9.**  $^{13}\text{C}$  NMR (125 MHz,  $\text{DMSO-}d_6$ ) and DEPT spectra of compound **2**;

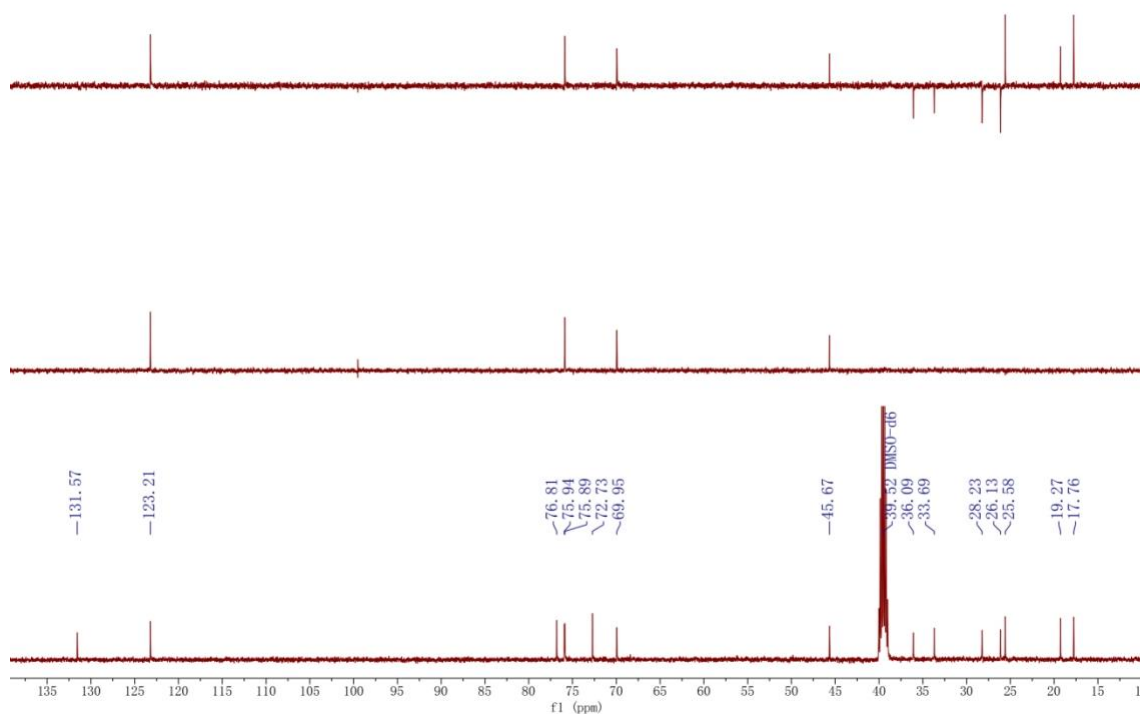

**Figure S10.** COSY spectrum of compound **2**;

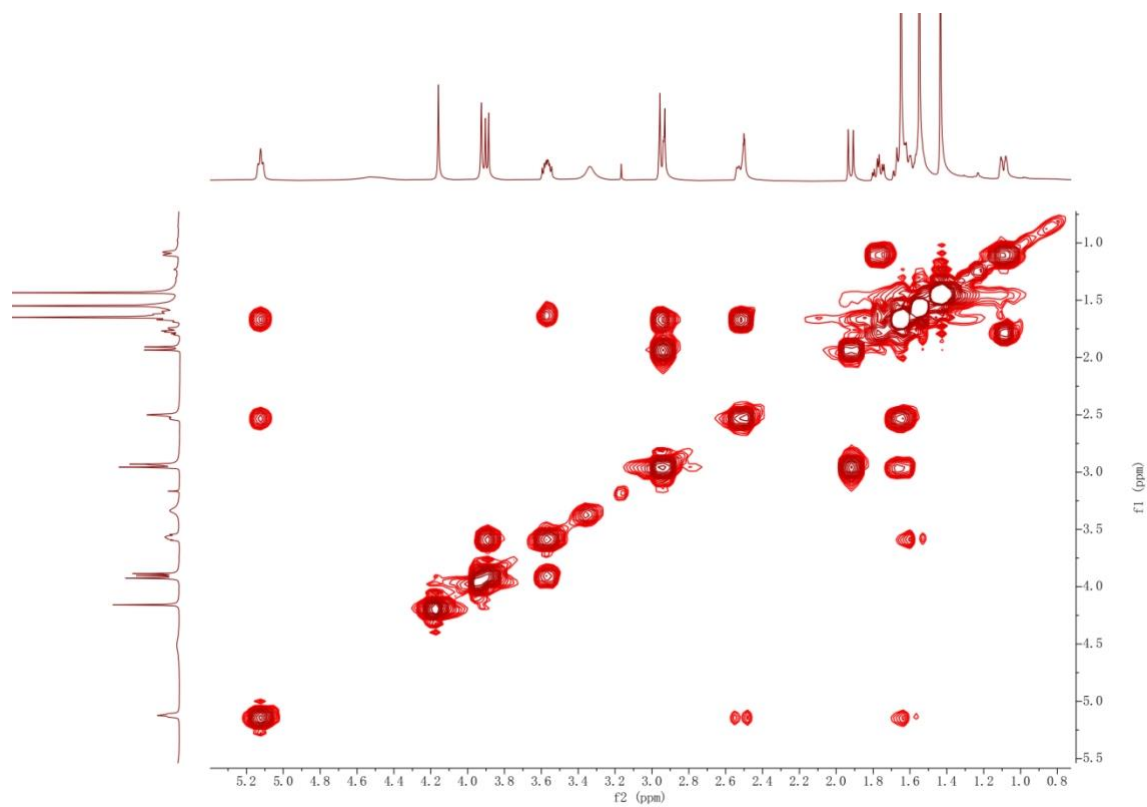

**Figure S11.** HSQC spectrum of compound **2**;

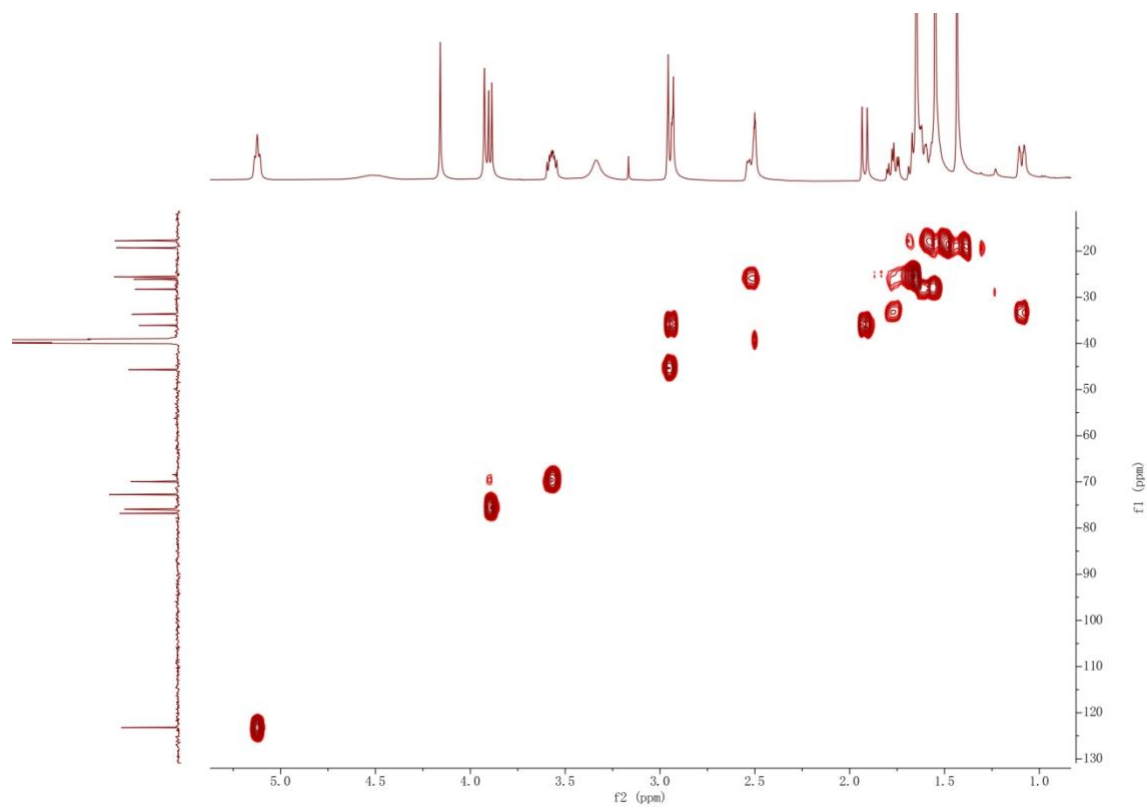



**Figure S12.** HMBC spectrum of compound **2**;

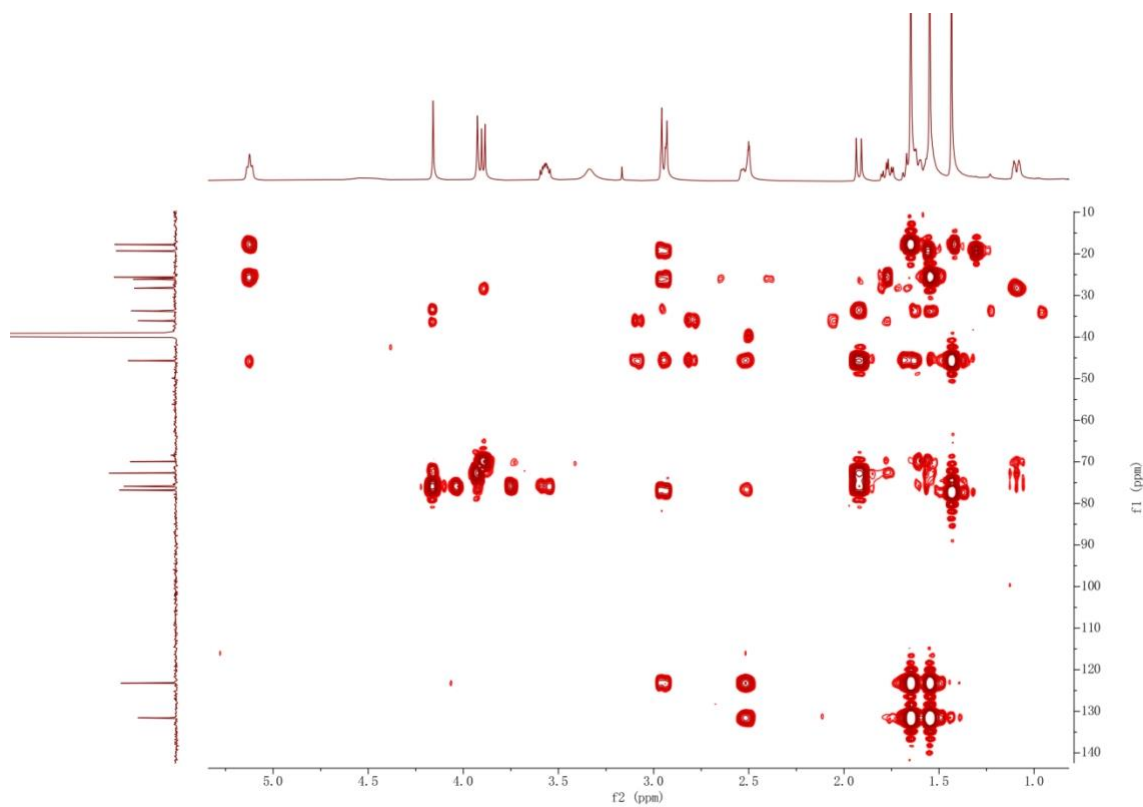

**Figure S13.** NOESY spectrum of compound **2**;

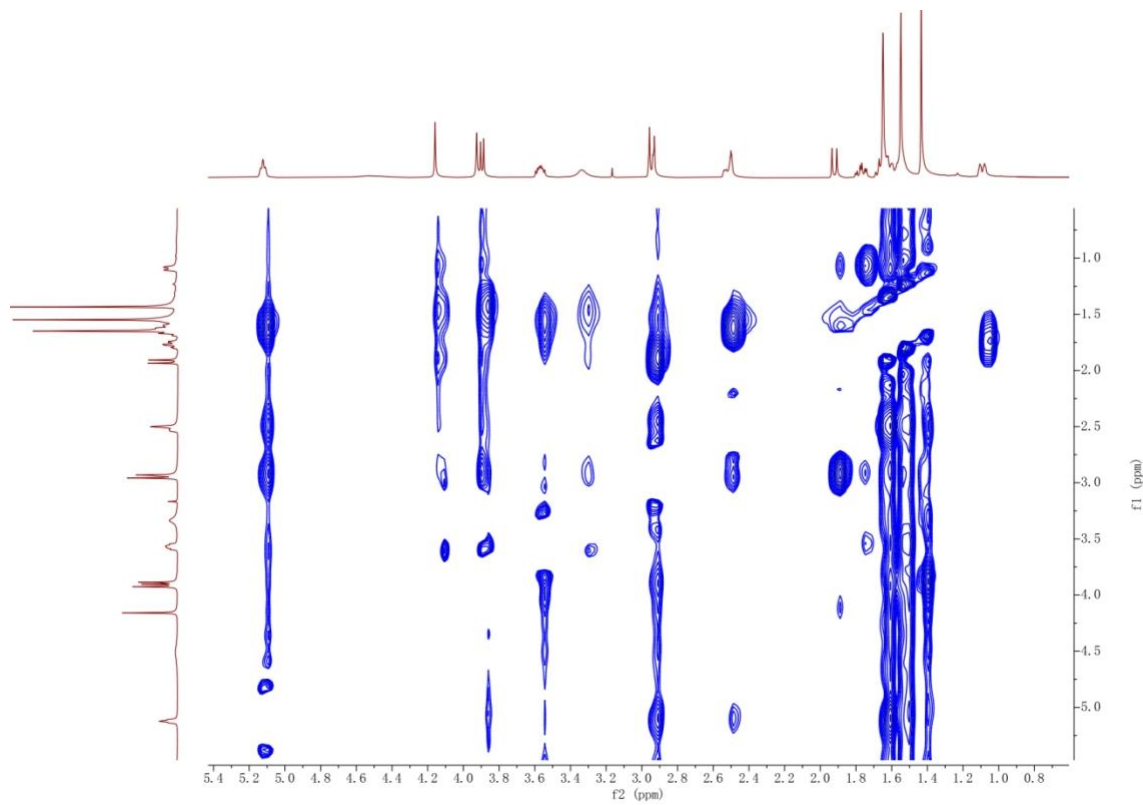

**Figure S14.** LC-MS spectrum of compound **2**;

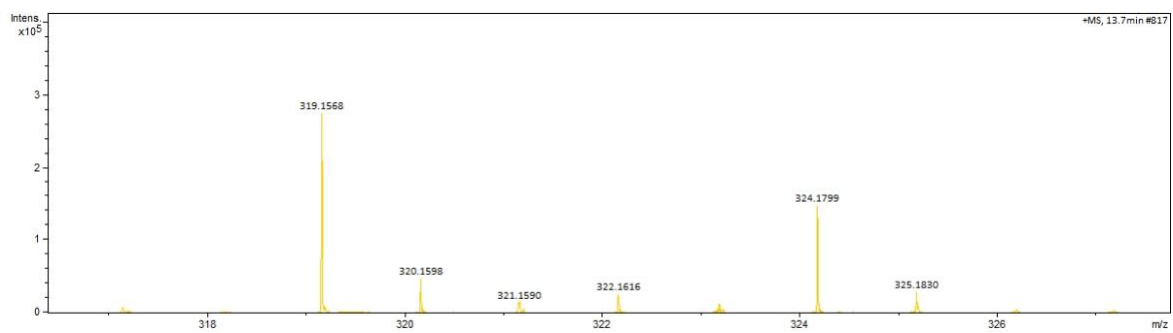

**Figure S15.**  $^1\text{H}$  NMR (500 MHz,  $\text{CDCl}_3$ ) spectrum of compound **3**;

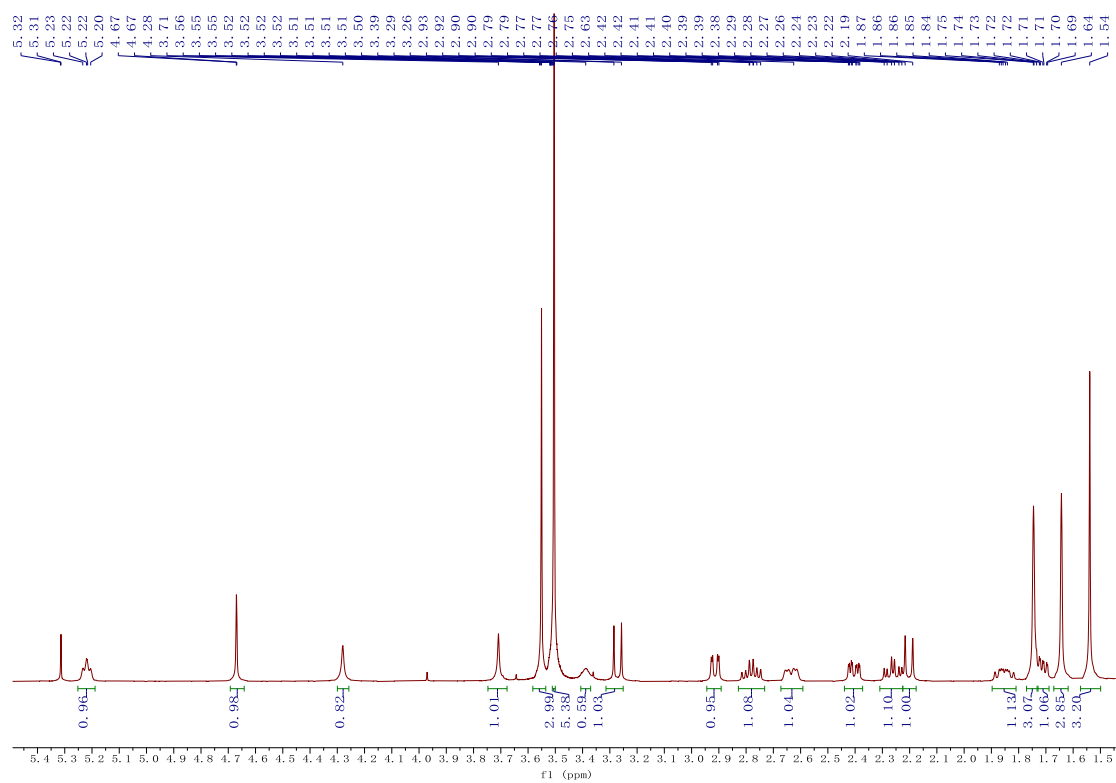

**Figure S16.**  $^{13}\text{C}$  NMR (125 MHz,  $\text{CDCl}_3$ ) and DEPT spectra of compound **3**;

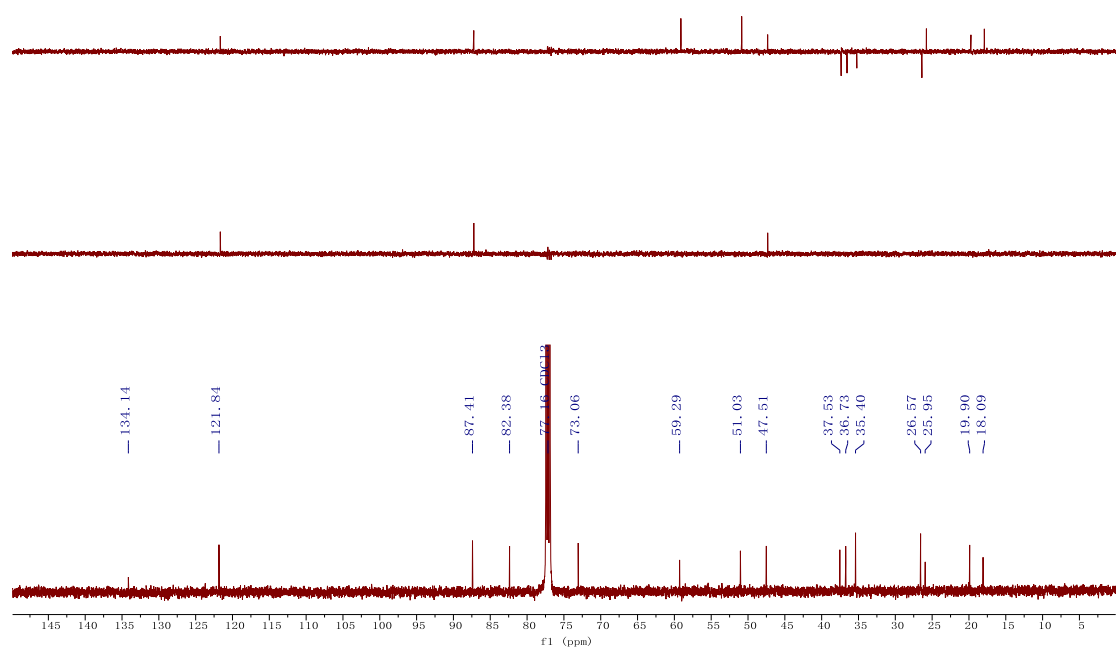

**Figure S17.** COSY spectrum of compound **3**;

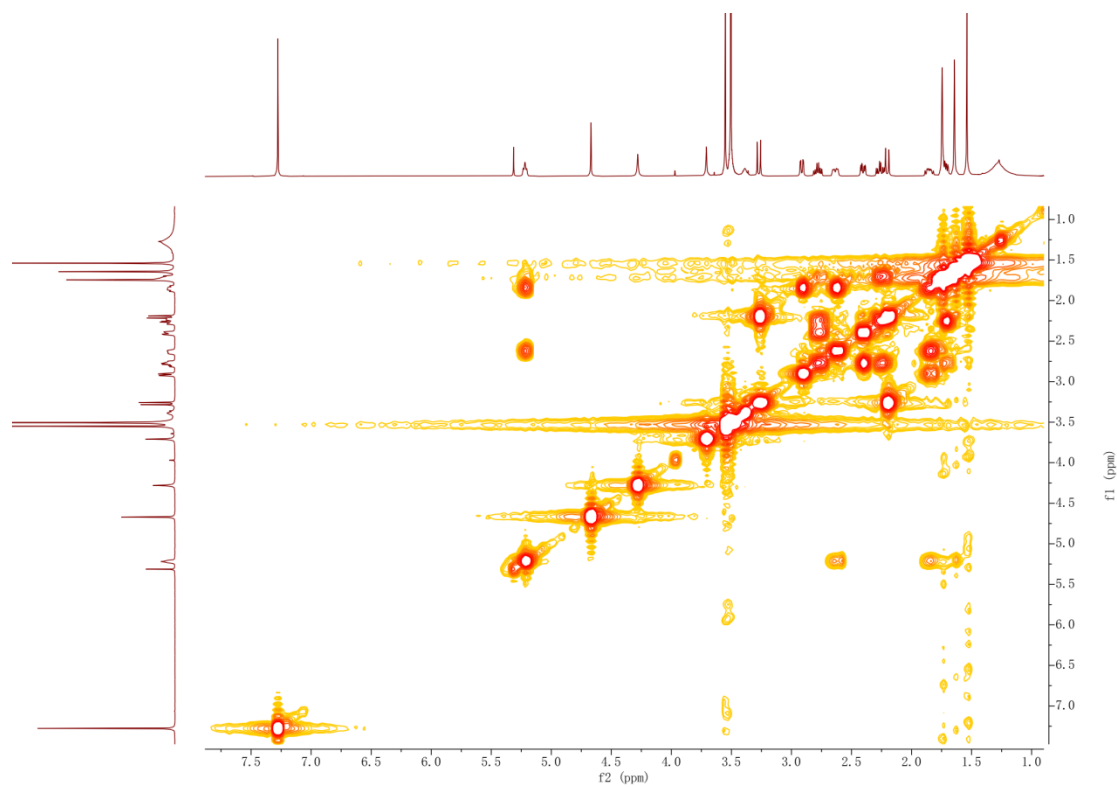

**Figure S18.** HSQC spectrum of compound **3**;

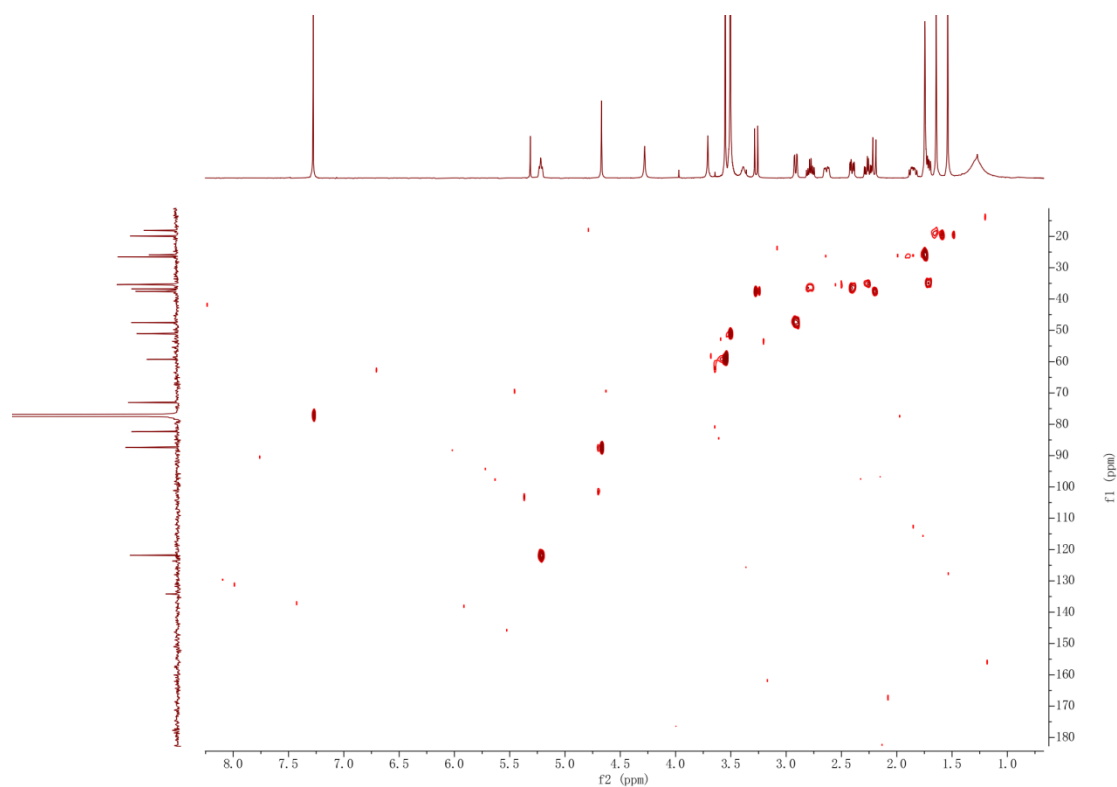

**Figure S19.** HMBC spectrum of compound **3**;

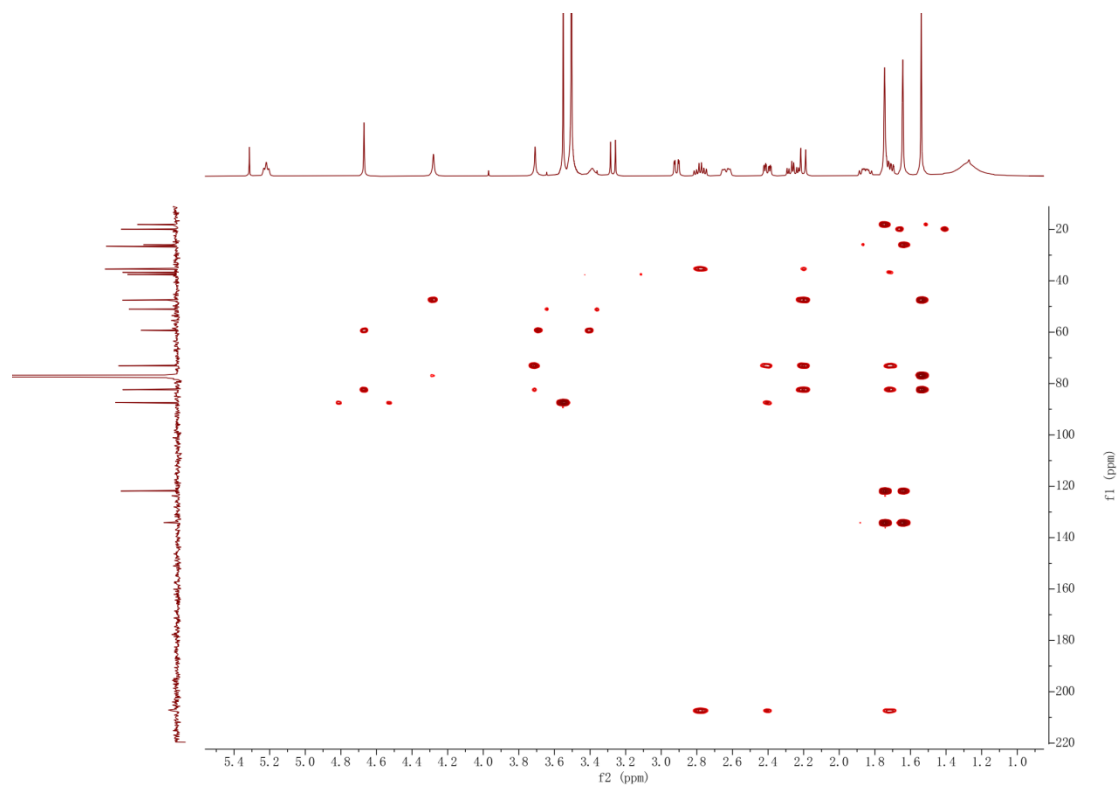

**Figure S20.**  $^1\text{H}$  NMR (500 MHz,  $\text{DMSO-}d_6$ ) spectrum of compound **4**;

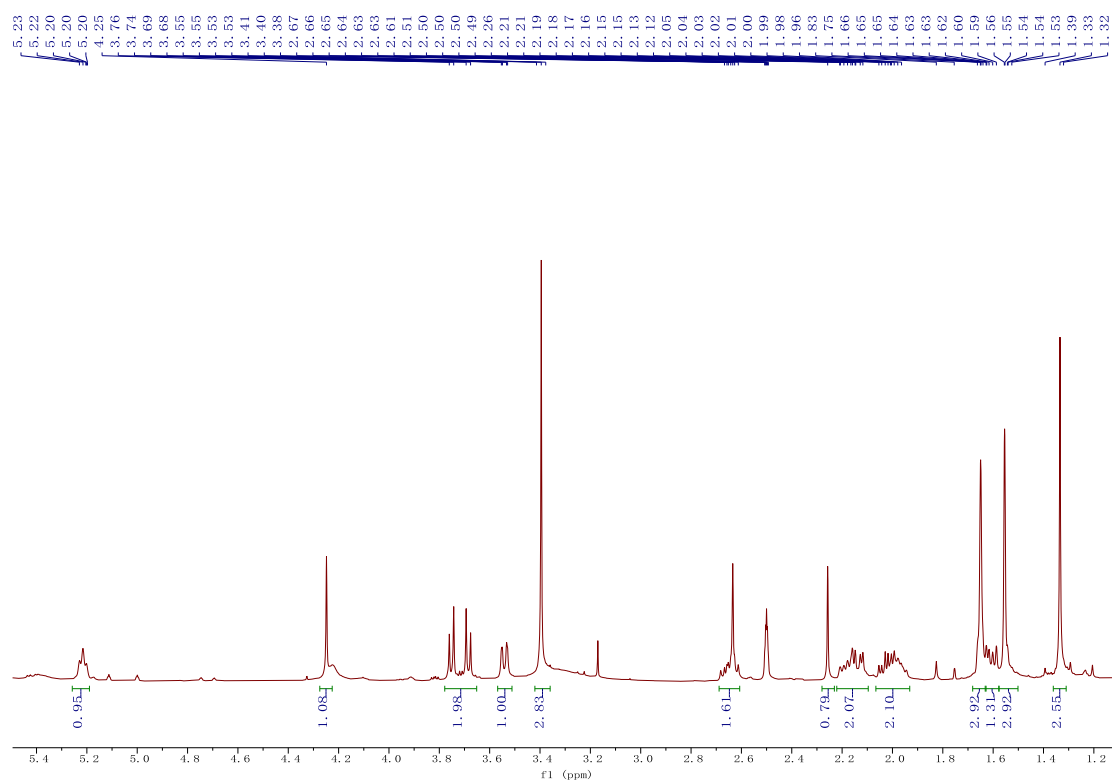

**Figure S21.**  $^{13}\text{C}$  NMR (125 MHz,  $\text{DMSO-}d_6$ ) and DEPT spectra of compound **4**;

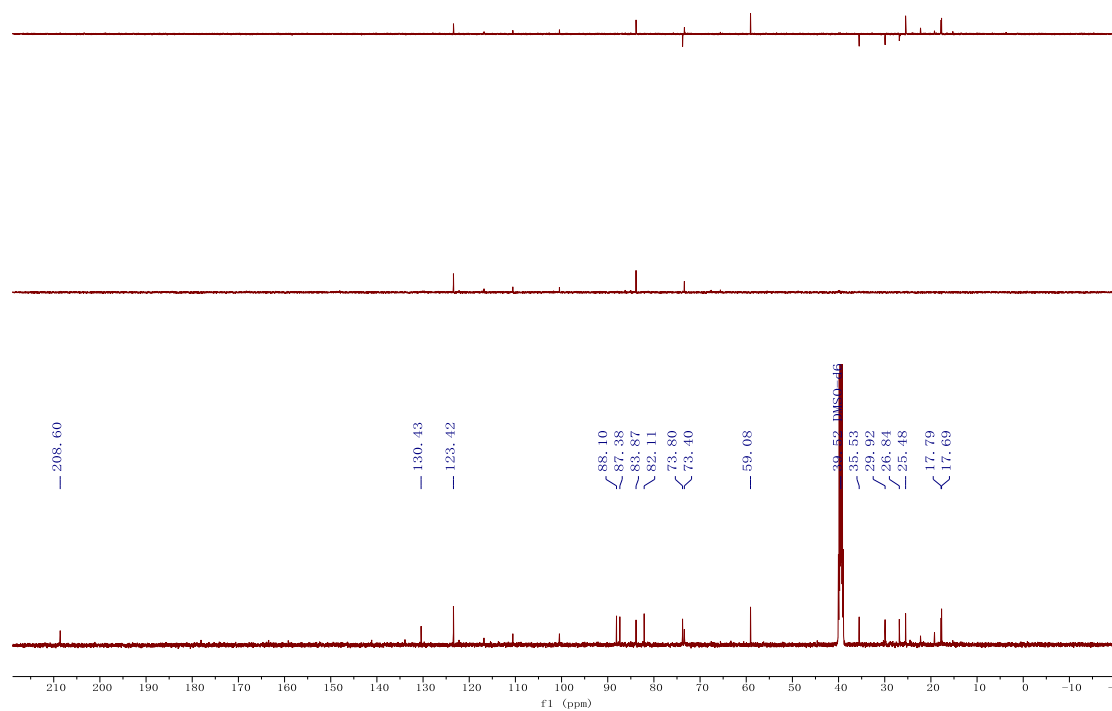

**Figure S22.**  $^1\text{H}$  NMR (500 MHz,  $\text{DMSO-}d_6$ ) spectrum of compound **5**;

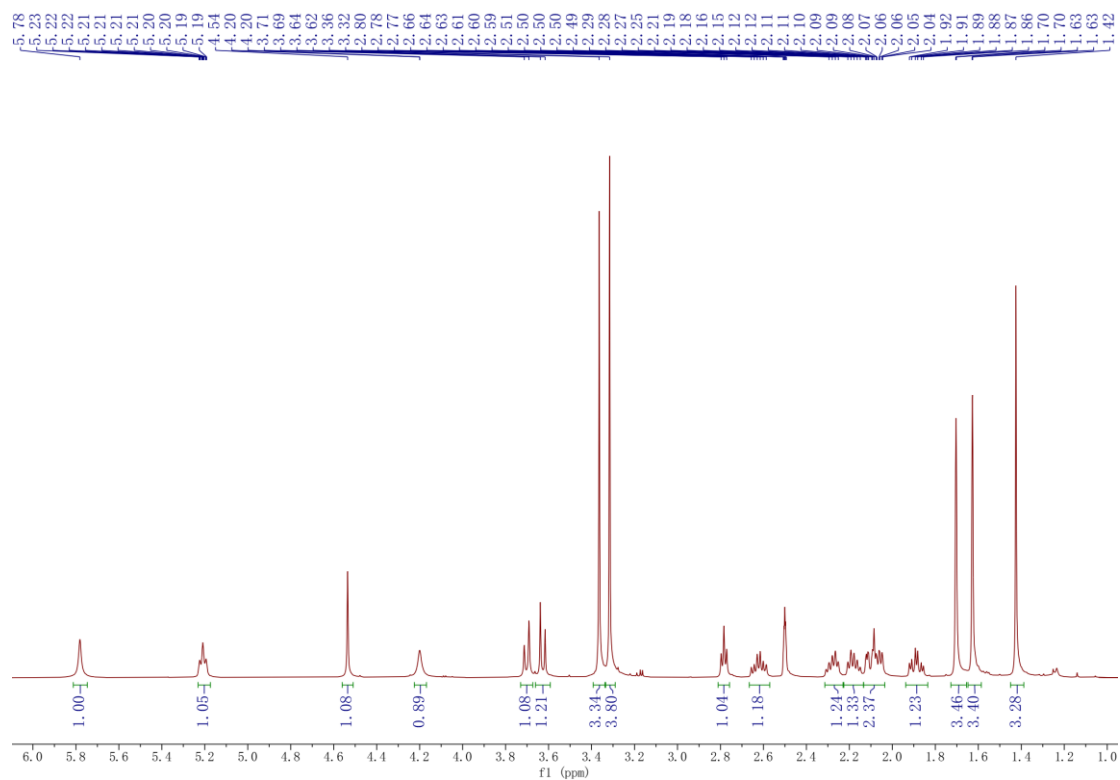

**Figure S23.**  $^{13}\text{C}$  NMR (125 MHz,  $\text{DMSO-}d_6$ ) and DEPT spectra of compound **5**.

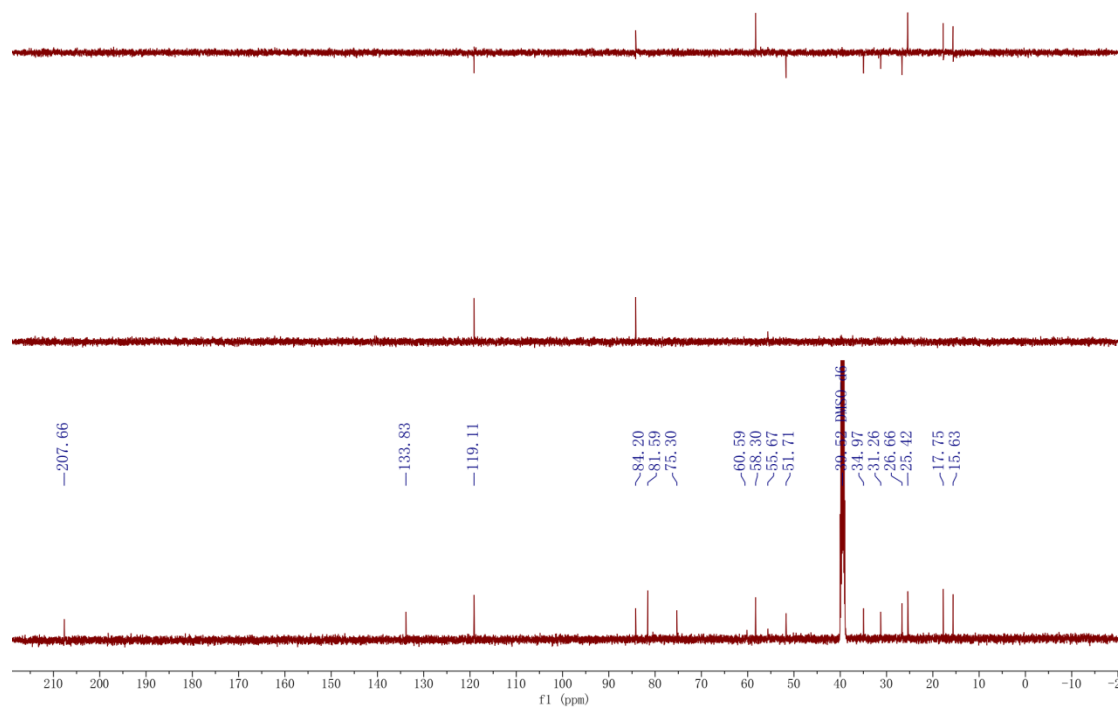

**Table S1.** Crystal data and structure refinement for compounds **1–3**.

| Identification code               | Compound <b>1</b>                                                                                                | Compound <b>2</b>                                                                                                                           | Compound <b>3</b>                                                                                                    |
|-----------------------------------|------------------------------------------------------------------------------------------------------------------|---------------------------------------------------------------------------------------------------------------------------------------------|----------------------------------------------------------------------------------------------------------------------|
| Empirical formula                 | C <sub>96</sub> H <sub>166</sub> O <sub>30</sub> S <sub>6</sub>                                                  | C <sub>30</sub> H <sub>52</sub> O <sub>10</sub> S <sub>2</sub>                                                                              | C <sub>16</sub> H <sub>26</sub> O <sub>5</sub> S                                                                     |
| Formular weight                   | 1992.64                                                                                                          | 636.83                                                                                                                                      | 330.43                                                                                                               |
| Temperature                       | 173(2) K                                                                                                         | 173(2) K                                                                                                                                    | 173(2) K                                                                                                             |
| Wavelength                        | 1.54178 Å                                                                                                        | 1.54178 Å                                                                                                                                   | 1.54178 Å                                                                                                            |
| Crytal system, space group        | Orthorhombic, P2(1)2(1)2(1)                                                                                      | Triclinic, P1                                                                                                                               | Hexagonal, P6(1)                                                                                                     |
| Unit cell dimensions              | a = 15.0176(3) Å<br>alpha = 90 deg.<br>b = 24.2644(4) Å<br>beta = 90 deg.<br>c = 29.3542(5) Å<br>gamma = 90 deg. | a = 6.50160(10) Å<br>alpha = 85.4270(10) deg.<br>b = 7.7295(2) Å<br>beta = 81.7990(10) deg.<br>c = 17.5958(4) Å<br>gamma = 65.1510(10) deg. | a = 13.99630(10) Å<br>alpha = 90 deg.<br>b = 13.99630(10) Å<br>beta = 90 deg<br>c = 30.1665(6) Å<br>gamma = 120 deg. |
| Volume                            | 10696.5(3) Å <sup>3</sup>                                                                                        | 794.00(3) Å <sup>3</sup>                                                                                                                    | 5117.78(13) Å <sup>3</sup>                                                                                           |
| Z, Calculated density             | 4, 1.237 Mg/m <sup>3</sup>                                                                                       | 1, 1.332 Mg/m <sup>3</sup>                                                                                                                  | 12, 1.287 Mg/m <sup>3</sup>                                                                                          |
| Absorption coefficient            | 1.783 mm <sup>-1</sup>                                                                                           | 1.979 mm <sup>-1</sup>                                                                                                                      | 1.863 mm <sup>-1</sup>                                                                                               |
| F(000)                            | 4312                                                                                                             | 344                                                                                                                                         | 2136                                                                                                                 |
| Crystal size                      | 0.180 x 0.160 x 0.120 mm                                                                                         | 0.180 x 0.150 x 0.120 mm                                                                                                                    | 0.160 x 0.140 x 0.120 mm                                                                                             |
| Theta range for data collection   | 2.362 to 68.182 deg.                                                                                             | 2.538 to 66.525 deg.                                                                                                                        | 3.646 to 68.266 deg                                                                                                  |
| Limiting indices                  | -17<=h<=17, -<br>21<=k<=29, -<br>33<=l<=35                                                                       | -7<=h<=7,<br>-9<=k<=9,<br>-20<=l<=20                                                                                                        | -16<=h<=16, -<br>16<=k<=16, -<br>36<=l<=36                                                                           |
| Reflections collected/unique      | 67427 / 19396<br>[R(int) = 0.0550]                                                                               | 18694 / 5468<br>[R(int) = 0.0381]                                                                                                           | 65189 / 6250<br>[R(int) = 0.0627]                                                                                    |
| Data/restraints/parameters        | 19396 / 0 / 1252                                                                                                 | 5468 / 3 / 415                                                                                                                              | 6250 / 1 / 442                                                                                                       |
| Goodness-of-fit on F <sup>2</sup> | 1.000                                                                                                            | 1.033                                                                                                                                       | 0.947                                                                                                                |
| Final R indices [I>2sigma(I)]     | R1 = 0.0512,<br>wR2 = 0.1339                                                                                     | R1 = 0.0287,<br>wR2 = 0.0714                                                                                                                | R1 = 0.0317,<br>wR2 = 0.0848                                                                                         |



|                              |                                    |                                    |                                    |
|------------------------------|------------------------------------|------------------------------------|------------------------------------|
| R indices (all data)         | R1 = 0.0605,<br>wR2 = 0.1430       | R1 = 0.0322,<br>wR2 = 0.0736       | R1 = 0.0361,<br>wR2 = 0.0883       |
| Absolute structure parameter | 0.019(6)                           | 0.048(7)                           | 0.024(6)                           |
| Extinction coefficient       | n/a                                | n/a                                | n/a                                |
| Largest diff. Peak and hole  | 0.792 and -0.378 e.A <sup>-3</sup> | 0.344 and -0.160 e.A <sup>-3</sup> | 0.175 and -0.189 e.A <sup>-3</sup> |

**Table S2.** <sup>1</sup>H, <sup>13</sup>C, COSY, HMBC Spectroscopic Data for Compound **1** in DMSO-*d*<sub>6</sub>.

| no.                    | <b>1</b>              |                                                      | COSY           | HMBC               |
|------------------------|-----------------------|------------------------------------------------------|----------------|--------------------|
|                        | $\delta_C^a$          | $\delta_H^b$ , mult ( <i>J</i> in Hz)                |                |                    |
| 1                      | 78.4, C               |                                                      |                |                    |
| 2                      | 79.2, CH              | 3.75 d (3.1)                                         | H-3            | C-8                |
| 3                      | 65.0, CH              | 4.22 dq (6.1, 3.1)                                   | H-2, H-4, 3-OH |                    |
| 4                      | 26.8, CH <sub>2</sub> | $\alpha$ 1.61 overlap<br>$\beta$ 1.87 overlap        | H-3, H-5       | C-2, C-6           |
| 5                      | 30.0, CH <sub>2</sub> | $\alpha$ 1.03 dt (11.6, 2.7)<br>$\beta$ 1.97 overlap | H-4            | C-1, C-3, C-6      |
| 6                      | 73.5, C               |                                                      |                |                    |
| 7                      | 75.8, C               |                                                      |                |                    |
| 8                      | 45.8, CH              | 2.93 dd (11.5, 2.4)                                  | H-9            | C-10               |
| 9                      | 26.2, CH <sub>2</sub> | $\alpha$ 1.68 overlap<br>$\beta$ 2.55 dd (15.2, 6.3) | H-8, H-10      | C-11               |
| 10                     | 123.2, CH             | 5.14 t (6.9)                                         | H-9            | C-12, C-13         |
| 11                     | 131.4, C              |                                                      |                |                    |
| 12                     | 25.5, CH <sub>3</sub> | 1.65 s                                               |                | C-10, C-13         |
| 13                     | 17.6, CH <sub>3</sub> | 1.55 s                                               |                | C-10, C-12         |
| 14                     | 35.9, CH <sub>2</sub> | $\alpha$ 1.93 d (13.7)<br>$\beta$ 3.01 d (13.7)      |                | C-1, C-5, C-6, C-8 |
| 15                     | 19.8, CH <sub>3</sub> | 1.39 s                                               |                | C-1, C-7, C-8      |
| 1-OH                   |                       | 5.28 s                                               |                | C-2, C-6           |
| 2-OCH <sub>3</sub> /OH | 55.1, CH <sub>3</sub> | 3.37 s                                               |                | C-2                |
| 3-OH                   |                       | 5.29 d (6.0)                                         |                | C-2, C-4           |
| 6-OH                   |                       | 4.32 s                                               |                | C-5, C-6, C-14     |
| 7-OH                   |                       | 4.79 s                                               |                | C-1, C-7, C-8      |

**Table S3.**  $^1\text{H}$ ,  $^{13}\text{C}$ , COSY, HMBC Spectroscopic Data for Compound **2** in  $\text{DMSO-}d_6$ .

| no.                    | <b>2</b>                       |                                                                   | COSY      | HMBC                |
|------------------------|--------------------------------|-------------------------------------------------------------------|-----------|---------------------|
|                        | $\delta_{\text{C}}^{\text{a}}$ | $\delta_{\text{H}}^{\text{b}}$ , mult ( $J$ in Hz)                |           |                     |
| 1                      | 76.8, C                        |                                                                   |           |                     |
| 2                      | 75.9, CH                       | 3.89 d (8.7)                                                      | H-3       | C-4                 |
| 3                      | 70.0, CH                       | 3.57 ddd (11.1, 8.7, 5.5)                                         | H-2, H-4, | C-1                 |
| 4                      | 28.2, CH <sub>2</sub>          | $\alpha$ 1.56 overlap<br>$\beta$ 1.60 overlap                     | H-3, H-5  | C-6                 |
| 5                      | 33.7, CH <sub>2</sub>          | $\alpha$ 1.09 ddd (13.2, 4.3, 2.7)<br>$\beta$ 1.77 td (13.2, 4.8) | H-4       | C-3, C-6            |
| 6                      | 72.7, C                        |                                                                   |           |                     |
| 7                      | 76.8, C                        |                                                                   |           |                     |
| 8                      | 45.7, CH                       | 2.94 overlap                                                      | H-9       | C-7                 |
| 9                      | 26.1, CH <sub>2</sub>          | $\alpha$ 1.67 overlap<br>$\beta$ 2.53 overlap                     | H-8, H-10 | C-11                |
| 10                     | 123.2, CH                      | 5.12 t (6.4)                                                      | H-9       | C-8, C-12, C-13     |
| 11                     | 131.6, C                       |                                                                   |           |                     |
| 12                     | 25.6, CH <sub>3</sub>          | 1.65 s                                                            |           | C-10, C-13          |
| 13                     | 17.8, CH <sub>3</sub>          | 1.55 s                                                            |           | C-10, C-12          |
| 14                     | 36.1, CH <sub>2</sub>          | $\alpha$ 1.92 d (13.6)<br>$\beta$ 2.95 overlap                    |           | C-1, C-6, C-8       |
| 15                     | 19.3, CH <sub>3</sub>          | 1.43 s                                                            |           | C-1, C-8            |
| 1-OH                   |                                | 3.93 s                                                            |           | C-6                 |
| 2-OCH <sub>3</sub> /OH |                                | 4.50 brs                                                          |           |                     |
| 3-OH                   |                                | 5.61 brs                                                          |           |                     |
| 6-OH                   |                                | 4.16 s                                                            |           | C-1, C-5, C-6, C-14 |
| 7-OH                   |                                | 3.34                                                              |           |                     |

**Table S4.**  $^1\text{H}$ ,  $^{13}\text{C}$ , COSY, HMBC Spectroscopic Data for Compound **3** in  $\text{CDCl}_3$ .

| no.                    | <b>3</b>                       |                                                                    | COSY      | HMBC             |
|------------------------|--------------------------------|--------------------------------------------------------------------|-----------|------------------|
|                        | $\delta_{\text{C}}^{\text{a}}$ | $\delta_{\text{H}}^{\text{b}}$ , mult ( $J$ in Hz)                 |           |                  |
| 1                      | 82.4, C                        |                                                                    |           |                  |
| 2                      | 87.4, CH                       | 4.67, s                                                            |           |                  |
| 3                      | 207.7, C                       |                                                                    |           |                  |
| 4                      | 36.7, CH <sub>2</sub>          | $\alpha$ 2.78 td (13.7, 6.9)<br>$\beta$ 2.40 ddd (13.7, 5.4, 1.7)  | H-5       | C-2, C-3, C-6    |
| 5                      | 35.4, CH <sub>2</sub>          | $\alpha$ 1.72 ddd (13.5, 6.9, 1.7)<br>$\beta$ 2.26 td (13.5, 5.4)  | H-4       | C-1, C-3, C-6    |
| 6                      | 73.1, C                        |                                                                    |           |                  |
| 7                      | 76.8, C                        |                                                                    |           |                  |
| 8                      | 47.5, CH                       | 2.91 dd (11.5, 2.5)                                                | H-9       |                  |
| 9                      | 26.6, CH <sub>2</sub>          | $\alpha$ 1.85 ddd (14.8, 11.5, 7.9)<br>$\beta$ 2.63 dd (15.5, 6.3) | H-8, H-10 | C-11             |
| 10                     | 121.8, CH                      | 5.22 t (7.3)                                                       | H-9       |                  |
| 11                     | 134.1, C                       |                                                                    |           |                  |
| 12                     | 26.0, CH <sub>3</sub>          | 1.75 s                                                             |           | C-10, C-11, C-13 |
| 13                     | 18.1, CH <sub>3</sub>          | 1.64 s,                                                            |           | C-10, C-11, C-12 |
| 14                     | 37.5, CH <sub>2</sub>          | $\alpha$ 2.20 d (13.9)<br>$\beta$ 3.27 d (13.9)                    |           | C-1, C-6, C-8    |
| 15                     | 19.9, CH <sub>3</sub>          | 1.54 s                                                             |           | C-7, C-8         |
| 1-OH                   |                                |                                                                    |           |                  |
| 2-OCH <sub>3</sub> /OH | 59.3, CH <sub>3</sub>          | 3.55 s                                                             |           | C-2              |
| 6-OH                   |                                | 3.71 s                                                             |           | C-1, C-6         |
| 7-OH                   |                                | 4.28 s                                                             |           | C-7, C-8         |
