# Supplementary material for: Pseudallenes A and B, new sulfur-containing ovalicin sesquiterpenoid derivatives with antimicrobial activity from the deep-sea cold seep sediment-derived fungus Pseudallescheria boydii CS-793
Source: Beilstein J Org Chem. 2024 Feb 28;20:470–8. doi: 10.3762/bjoc.20.42 (PMC10910587; doi:10.3762/bjoc.20.42)
Supplement: File 2 — X-ray crystallographic files of compounds 1–3. [file Beilstein_J_Org_Chem-20-470-s002.zip]

Archive with 6 entries (6 files):
- checkcif-cpd.1.pdf
- checkcif-cpd.2.pdf
- checkcif-cpd.3.pdf
- cpd.1.cif
- cpd.2.cif
- cpd.3.cif
