# Supplementary material for: Pseudallenes A and B, new sulfur-containing ovalicin sesquiterpenoid derivatives with antimicrobial activity from the deep-sea cold seep sediment-derived fungus Pseudallescheria boydii CS-793
Source: Beilstein J Org Chem. 2024 Feb 28;20:470–8. doi: 10.3762/bjoc.20.42 (PMC10910587; doi:10.3762/bjoc.20.42)
Supplement: File 2 — X-ray crystallographic files of compounds 1–3. [file Beilstein_J_Org_Chem-20-470-s002.zip › cpd.1.cif]

 
data_t_a
 
_audit_creation_method            'SHELXL-2018/3'
_shelx_SHELXL_version_number      '2018/3'
_chemical_name_systematic         ?
_chemical_name_common             ?
_chemical_melting_point           ?
_chemical_formula_moiety          'C16 H26 O5 S, 5(C16 H28 O5 S)'
_chemical_formula_sum
 'C96 H166 O30 S6' 
_chemical_formula_weight          1992.64

loop_
 _atom_type_symbol
 _atom_type_description
 _atom_type_scat_dispersion_real
 _atom_type_scat_dispersion_imag
 _atom_type_scat_source
 'C'  'C'   0.0181   0.0091
 'International Tables Vol C Tables 4.2.6.8 and 6.1.1.4'
 'H'  'H'   0.0000   0.0000
 'International Tables Vol C Tables 4.2.6.8 and 6.1.1.4'
 'O'  'O'   0.0492   0.0322
 'International Tables Vol C Tables 4.2.6.8 and 6.1.1.4'
 'S'  'S'   0.3331   0.5567
 'International Tables Vol C Tables 4.2.6.8 and 6.1.1.4'
 
_space_group_crystal_system       orthorhombic
_space_group_IT_number            19
_space_group_name_H-M_alt         'P 21 21 21'
_space_group_name_Hall            'P 2ac 2ab'
 
_shelx_space_group_comment
;
The symmetry employed for this shelxl refinement is uniquely defined
by the following loop, which should always be used as a source of
symmetry information in preference to the above space-group names.
They are only intended as comments.
;
 
loop_
 _space_group_symop_operation_xyz
 'x, y, z'
 '-x+1/2, -y, z+1/2'
 '-x, y+1/2, -z+1/2'
 'x+1/2, -y+1/2, -z'
 
_cell_length_a                    15.0176(3)
_cell_length_b                    24.2644(4)
_cell_length_c                    29.3542(5)
_cell_angle_alpha                 90
_cell_angle_beta                  90
_cell_angle_gamma                 90
_cell_volume                      10696.5(3)
_cell_formula_units_Z             4
_cell_measurement_temperature     173(2)
_cell_measurement_reflns_used     9096
_cell_measurement_theta_min        3.31
_cell_measurement_theta_max       68.13
 
_exptl_crystal_description        block
_exptl_crystal_colour             colourless
_exptl_crystal_density_meas       ?
_exptl_crystal_density_method     ?
_exptl_crystal_density_diffrn     1.237          
_exptl_crystal_F_000              4312
_exptl_transmission_factor_min    ?
_exptl_transmission_factor_max    ?
_exptl_crystal_size_max           0.180
_exptl_crystal_size_mid           0.160
_exptl_crystal_size_min           0.120
_exptl_absorpt_coefficient_mu     1.783
_shelx_estimated_absorpt_T_min    0.740
_shelx_estimated_absorpt_T_max    0.815
_exptl_absorpt_correction_type    multi-scan
_exptl_absorpt_correction_T_min   0.5677
_exptl_absorpt_correction_T_max   0.7531
_exptl_absorpt_process_details    
;
SADABS-2016/2 - Bruker AXS area detector scaling and absorption correction 
;
_exptl_absorpt_special_details    ?
_diffrn_ambient_temperature       173(2)
_diffrn_radiation_wavelength      1.54178
_diffrn_radiation_type            CuK\a
_diffrn_source                    ?
_diffrn_measurement_device_type   'Bruker D8 VENTURE'
_diffrn_measurement_method        '\f and \w scans'
_diffrn_detector_area_resol_mean  ?
_diffrn_reflns_number             67427
_diffrn_reflns_av_unetI/netI      0.0492
_diffrn_reflns_av_R_equivalents   0.0550
_diffrn_reflns_limit_h_min        -17
_diffrn_reflns_limit_h_max        17
_diffrn_reflns_limit_k_min        -21
_diffrn_reflns_limit_k_max        29
_diffrn_reflns_limit_l_min        -33
_diffrn_reflns_limit_l_max        35
_diffrn_reflns_theta_min          2.362
_diffrn_reflns_theta_max          68.182
_diffrn_reflns_theta_full         67.679
_diffrn_measured_fraction_theta_max   0.995
_diffrn_measured_fraction_theta_full  0.997
_diffrn_reflns_Laue_measured_fraction_max    0.995
_diffrn_reflns_Laue_measured_fraction_full   0.997
_diffrn_reflns_point_group_measured_fraction_max   0.991
_diffrn_reflns_point_group_measured_fraction_full  0.993
_reflns_number_total              19396
_reflns_number_gt                 17030
_reflns_threshold_expression      'I > 2\s(I)'
_reflns_Friedel_coverage          0.833
_reflns_Friedel_fraction_max      0.985
_reflns_Friedel_fraction_full     0.989
 
_reflns_special_details
;
 Reflections were merged by SHELXL according to the crystal
 class for the calculation of statistics and refinement.
 
 _reflns_Friedel_fraction is defined as the number of unique
 Friedel pairs measured divided by the number that would be
 possible theoretically, ignoring centric projections and
 systematic absences.
;
 
_computing_data_collection        ?
_computing_cell_refinement        ?
_computing_data_reduction         ?
_computing_structure_solution     'SHELXT 2018/2 (Sheldrick, 2018)'
_computing_structure_refinement 'SHELXL-2018/3 (Sheldrick, 2018)'
_computing_molecular_graphics     ?
_computing_publication_material   ?
_refine_special_details           ?
_refine_ls_structure_factor_coef  Fsqd
_refine_ls_matrix_type            full
_refine_ls_weighting_scheme       calc
_refine_ls_weighting_details
'w=1/[\s^2^(Fo^2^)+(0.0841P)^2^+4.5411P] where P=(Fo^2^+2Fc^2^)/3'
_atom_sites_solution_primary      ?
_atom_sites_solution_secondary    ?
_atom_sites_solution_hydrogens    mixed
_refine_ls_hydrogen_treatment     mixed
_refine_ls_extinction_method      none
_refine_ls_extinction_coef        .
_refine_ls_abs_structure_details
;
 Flack x determined using 6763 quotients [(I+)-(I-)]/[(I+)+(I-)]
 (Parsons, Flack and Wagner, Acta Cryst. B69 (2013) 249-259).
;
_refine_ls_abs_structure_Flack    0.019(6)
_chemical_absolute_configuration  AD
_refine_ls_number_reflns          19396
_refine_ls_number_parameters      1252
_refine_ls_number_restraints      0
_refine_ls_R_factor_all           0.0605
_refine_ls_R_factor_gt            0.0512
_refine_ls_wR_factor_ref          0.1430
_refine_ls_wR_factor_gt           0.1339
_refine_ls_goodness_of_fit_ref    1.000
_refine_ls_restrained_S_all       1.000
_refine_ls_shift/su_max           0.000
_refine_ls_shift/su_mean          0.000
 
loop_
 _atom_site_label
 _atom_site_type_symbol
 _atom_site_fract_x
 _atom_site_fract_y
 _atom_site_fract_z
 _atom_site_U_iso_or_equiv
 _atom_site_adp_type
 _atom_site_occupancy
 _atom_site_site_symmetry_order  
 _atom_site_calc_flag
 _atom_site_refinement_flags_posn
 _atom_site_refinement_flags_adp
 _atom_site_refinement_flags_occupancy
 _atom_site_disorder_assembly
 _atom_site_disorder_group
O8 O 0.4089(2) 0.51078(12) 0.27788(10) 0.0296(6) Uani 1 1 d . . . . .
H8B H 0.367332 0.521073 0.260753 0.044 Uiso 1 1 calc R U . . .
C8 C 0.4202(4) 0.20118(19) 0.50242(18) 0.0434(12) Uani 1 1 d . . . . .
H8 H 0.449428 0.203357 0.471856 0.052 Uiso 1 1 calc R U . . .
O9 O 0.4295(2) 0.50847(14) 0.40091(10) 0.0381(7) Uani 1 1 d . . . . .
H9 H 0.449028 0.484814 0.419261 0.057 Uiso 1 1 calc R U . . .
C9 C 0.3681(3) 0.25592(19) 0.50945(15) 0.0345(10) Uani 1 1 d . . . . .
O10 O 0.2564(2) 0.56855(12) 0.29156(10) 0.0319(7) Uani 1 1 d . . . . .
H10 H 0.289666 0.595550 0.286042 0.048 Uiso 1 1 calc R U . . .
C10 C 0.3129(4) 0.2557(3) 0.55280(18) 0.0534(14) Uani 1 1 d . . . . .
H10A H 0.352455 0.252430 0.579239 0.080 Uiso 1 1 calc R U . . .
H10B H 0.271783 0.224326 0.552236 0.080 Uiso 1 1 calc R U . . .
H10C H 0.278977 0.290050 0.554906 0.080 Uiso 1 1 calc R U . . .
O11 O 0.8529(3) 0.67136(18) 0.12936(13) 0.0538(10) Uani 1 1 d . . . . .
H1 H 0.803(6) 0.668(3) 0.113(3) 0.081 Uiso 1 1 d . U . . .
C11 C 0.2414(6) 0.4041(3) 0.4920(2) 0.082(3) Uani 1 1 d . . . . .
H11A H 0.191318 0.399727 0.470925 0.123 Uiso 1 1 calc R U . . .
H11B H 0.268939 0.440273 0.487416 0.123 Uiso 1 1 calc R U . . .
H11C H 0.219748 0.401254 0.523452 0.123 Uiso 1 1 calc R U . . .
S1 S 0.50800(12) 0.19193(5) 0.54418(5) 0.0553(4) Uani 1 1 d . . . . .
O1 O 0.4847(3) 0.31078(14) 0.58215(10) 0.0409(8) Uani 1 1 d . . . . .
H1A H 0.528323 0.314801 0.599765 0.061 Uiso 1 1 calc R U . . .
C1 C 0.4329(3) 0.30675(18) 0.50477(14) 0.0318(9) Uani 1 1 d . . . . .
O12 O 0.7773(2) 0.77380(15) 0.15215(11) 0.0417(8) Uani 1 1 d . . . . .
C12 C 0.3633(5) 0.1493(2) 0.5027(2) 0.0646(17) Uani 1 1 d . . . . .
H12A H 0.304030 0.157322 0.489513 0.078 Uiso 1 1 calc R U . . .
H12B H 0.354788 0.136336 0.534384 0.078 Uiso 1 1 calc R U . . .
O13 O 0.6765(2) 0.68979(13) 0.11004(10) 0.0348(7) Uani 1 1 d . . . . .
H13A H 0.667321 0.716800 0.092771 0.052 Uiso 1 1 calc R U . . .
C13 C 0.4109(5) 0.1035(2) 0.4740(2) 0.0610(16) Uani 1 1 d . . . . .
H13 H 0.473063 0.107620 0.469045 0.073 Uiso 1 1 calc R U . . .
O14 O 0.6212(2) 0.66592(14) 0.22812(10) 0.0389(8) Uani 1 1 d . . . . .
H14 H 0.605459 0.637668 0.242586 0.058 Uiso 1 1 calc R U . . .
C14 C 0.3721(5) 0.0599(3) 0.4561(2) 0.0607(15) Uani 1 1 d . . . . .
O15 O 0.6161(2) 0.79341(12) 0.12325(10) 0.0308(6) Uani 1 1 d . . . . .
H15 H 0.668214 0.803997 0.128758 0.046 Uiso 1 1 calc R U . . .
C15 C 0.4220(5) 0.0198(3) 0.4263(3) 0.0719(19) Uani 1 1 d . . . . .
H15A H 0.397415 0.020873 0.395350 0.108 Uiso 1 1 calc R U . . .
H15B H 0.415900 -0.017501 0.438670 0.108 Uiso 1 1 calc R U . . .
H15C H 0.485155 0.029970 0.425362 0.108 Uiso 1 1 calc R U . . .
O16 O -0.0789(2) 0.79620(12) 0.37657(10) 0.0305(6) Uani 1 1 d . . . . .
H16 H -0.134443 0.792380 0.377011 0.046 Uiso 1 1 calc R U . . .
C16 C 0.2762(6) 0.0466(4) 0.4629(4) 0.101(3) Uani 1 1 d . . . . .
H16A H 0.270411 0.008241 0.473002 0.152 Uiso 1 1 calc R U . . .
H16B H 0.244210 0.051451 0.434056 0.152 Uiso 1 1 calc R U . . .
H16C H 0.250968 0.071162 0.485968 0.152 Uiso 1 1 calc R U . . .
O17 O -0.0444(2) 0.66416(12) 0.27608(10) 0.0324(7) Uani 1 1 d . . . . .
H17 H -0.026804 0.636574 0.261306 0.049 Uiso 1 1 calc R U . . .
C17 C 0.3936(3) 0.53129(17) 0.32346(13) 0.0284(9) Uani 1 1 d . . . . .
O18 O -0.0680(2) 0.68911(12) 0.39684(9) 0.0289(6) Uani 1 1 d . . . . .
H18A H -0.071650 0.718149 0.412300 0.043 Uiso 1 1 calc R U . . .
C18 C 0.4444(3) 0.58666(18) 0.32916(15) 0.0349(10) Uani 1 1 d . . . . .
H18 H 0.437438 0.599447 0.361353 0.042 Uiso 1 1 calc R U . . .
O19 O -0.2257(2) 0.74125(13) 0.35681(11) 0.0343(7) Uani 1 1 d . . . . .
C19 C 0.5439(3) 0.5814(2) 0.31861(16) 0.0405(11) Uani 1 1 d . . . . .
H19 H 0.572534 0.617362 0.326582 0.049 Uiso 1 1 calc R U . . .
O20 O -0.2274(2) 0.63470(14) 0.39708(11) 0.0398(7) Uani 1 1 d . . . . .
H20 H -0.179496 0.643299 0.410050 0.060 Uiso 1 1 calc R U . . .
C20 C 0.5866(4) 0.5371(2) 0.34831(18) 0.0439(12) Uani 1 1 d . . . . .
H20A H 0.649462 0.531961 0.339037 0.053 Uiso 1 1 calc R U . . .
H20B H 0.585979 0.549175 0.380514 0.053 Uiso 1 1 calc R U . . .
S2 S 0.27813(9) 0.43231(5) 0.36755(4) 0.0432(3) Uani 1 1 d . . . . .
O2 O 0.4684(2) 0.30641(14) 0.45936(10) 0.0360(7) Uani 1 1 d . . . . .
H2A H 0.429937 0.293991 0.441286 0.054 Uiso 1 1 calc R U . . .
C2 C 0.3816(4) 0.3618(2) 0.51277(16) 0.0455(13) Uani 1 1 d . . . . .
H2 H 0.360698 0.362596 0.545108 0.055 Uiso 1 1 calc R U . . .
O21 O 0.1986(2) 0.61929(12) 0.18899(11) 0.0395(8) Uani 1 1 d . . . . .
C21 C 0.5376(3) 0.4826(2) 0.34411(16) 0.0402(11) Uani 1 1 d . . . . .
H21A H 0.565045 0.455411 0.364947 0.048 Uiso 1 1 calc R U . . .
H21B H 0.543945 0.468599 0.312614 0.048 Uiso 1 1 calc R U . . .
O22 O 0.0412(3) 0.58032(16) 0.23202(12) 0.0458(9) Uani 1 1 d . . . . .
H22 H 0.088631 0.566566 0.242071 0.069 Uiso 1 1 calc R U . . .
C22 C 0.4381(3) 0.48834(18) 0.35560(14) 0.0314(9) Uani 1 1 d . . . . .
O23 O 0.1214(3) 0.49678(14) 0.10121(11) 0.0404(8) Uani 1 1 d . . . . .
C23 C 0.3935(3) 0.43158(19) 0.35012(17) 0.0384(11) Uani 1 1 d . . . . .
H23A H 0.426240 0.404134 0.368605 0.046 Uiso 1 1 calc R U . . .
H23B H 0.397189 0.420056 0.317823 0.046 Uiso 1 1 calc R U . . .
O24 O 0.1777(2) 0.50813(13) 0.22025(10) 0.0306(6) Uani 1 1 d . . . . .
H24B H 0.214774 0.526470 0.235383 0.046 Uiso 1 1 calc R U . . .
C24 C 0.2401(3) 0.48332(19) 0.32669(15) 0.0342(10) Uani 1 1 d . . . . .
H24 H 0.250776 0.468248 0.295453 0.041 Uiso 1 1 calc R U . . .
O25 O 0.3351(2) 0.55062(12) 0.19446(10) 0.0337(7) Uani 1 1 d . . . . .
H25 H 0.321080 0.584101 0.193280 0.051 Uiso 1 1 calc R U . . .
C25 C 0.2907(3) 0.53845(18) 0.33056(14) 0.0313(9) Uani 1 1 d . . . . .
O26 O -0.0045(3) 0.43026(15) 0.05915(11) 0.0443(8) Uani 1 1 d . . . . .
H26 H -0.019548 0.399164 0.069081 0.066 Uiso 1 1 calc R U . . .
C26 C 0.2671(3) 0.5701(2) 0.37426(15) 0.0393(10) Uani 1 1 d . . . . .
H26A H 0.286200 0.548741 0.400854 0.059 Uiso 1 1 calc R U . . .
H26B H 0.202588 0.575927 0.375606 0.059 Uiso 1 1 calc R U . . .
H26C H 0.297522 0.605840 0.374190 0.059 Uiso 1 1 calc R U . . .
O27 O 0.1228(2) 0.36398(14) 0.01253(11) 0.0376(7) Uani 1 1 d . . . . .
C27 C 0.4284(4) 0.68182(19) 0.3068(2) 0.0494(13) Uani 1 1 d . . . . .
H27A H 0.391637 0.706195 0.287952 0.074 Uiso 1 1 calc R U . . .
H27B H 0.491140 0.686196 0.298324 0.074 Uiso 1 1 calc R U . . .
H27C H 0.420628 0.691416 0.338972 0.074 Uiso 1 1 calc R U . . .
O28 O -0.0398(2) 0.32090(13) 0.04933(10) 0.0331(7) Uani 1 1 d . . . . .
H28 H 0.005162 0.308456 0.062884 0.050 Uiso 1 1 calc R U . . .
C28 C 0.1394(3) 0.4908(2) 0.33262(17) 0.0404(11) Uani 1 1 d . . . . .
H28A H 0.125640 0.492137 0.365577 0.048 Uiso 1 1 calc R U . . .
H28B H 0.121964 0.526721 0.319281 0.048 Uiso 1 1 calc R U . . .
O29 O -0.0991(2) 0.34262(13) -0.06864(10) 0.0358(7) Uani 1 1 d . . . . .
H29A H -0.148168 0.342006 -0.082395 0.054 Uiso 1 1 calc R U . . .
C29 C 0.0851(4) 0.4467(2) 0.31121(19) 0.0471(12) Uani 1 1 d . . . . .
H29 H 0.106613 0.432733 0.283056 0.057 Uiso 1 1 calc R U . . .
O30 O 0.0947(2) 0.25768(14) 0.01978(12) 0.0397(8) Uani 1 1 d . . . . .
H30 H 0.130962 0.284055 0.019671 0.060 Uiso 1 1 calc R U . . .
C30 C 0.0106(4) 0.4245(2) 0.3264(2) 0.0485(13) Uani 1 1 d . . . . .
C31 C -0.0335(5) 0.4393(3) 0.3705(3) 0.080(2) Uani 1 1 d . . . . .
H31A H -0.040830 0.406022 0.389115 0.121 Uiso 1 1 calc R U . . .
H31B H -0.092029 0.455509 0.364360 0.121 Uiso 1 1 calc R U . . .
H31C H 0.003462 0.465953 0.386967 0.121 Uiso 1 1 calc R U . . .
S3 S 0.45318(9) 0.67410(5) 0.16851(5) 0.0467(3) Uani 1 1 d . . . . .
O3 O 0.3056(3) 0.36192(17) 0.48378(12) 0.0564(11) Uani 1 1 d . . . . .
C3 C 0.4391(6) 0.4122(2) 0.5045(2) 0.066(2) Uani 1 1 d . . . . .
H3 H 0.404692 0.445502 0.514191 0.079 Uiso 1 1 calc R U . . .
C32 C -0.0403(5) 0.3827(4) 0.2991(3) 0.086(3) Uani 1 1 d . . . . .
H32A H -0.102329 0.394664 0.296033 0.129 Uiso 1 1 calc R U . . .
H32B H -0.038313 0.346971 0.314619 0.129 Uiso 1 1 calc R U . . .
H32C H -0.013432 0.379239 0.268807 0.129 Uiso 1 1 calc R U . . .
C33 C 0.6327(4) 0.65232(18) 0.18117(15) 0.0372(10) Uani 1 1 d . . . . .
C34 C 0.7075(4) 0.6090(2) 0.17762(18) 0.0512(14) Uani 1 1 d . . . . .
H34A H 0.688923 0.574935 0.193503 0.061 Uiso 1 1 calc R U . . .
H34B H 0.717811 0.599875 0.145183 0.061 Uiso 1 1 calc R U . . .
C35 C 0.7936(4) 0.6303(2) 0.19857(18) 0.0497(14) Uani 1 1 d . . . . .
H35A H 0.783733 0.637958 0.231309 0.060 Uiso 1 1 calc R U . . .
H35B H 0.839948 0.601415 0.196161 0.060 Uiso 1 1 calc R U . . .
C36 C 0.8259(4) 0.6819(2) 0.17539(16) 0.0440(12) Uani 1 1 d . . . . .
H36 H 0.878451 0.696300 0.192614 0.053 Uiso 1 1 calc R U . . .
C37 C 0.7517(3) 0.72568(19) 0.17702(15) 0.0356(10) Uani 1 1 d . . . . .
H37 H 0.741714 0.736341 0.209525 0.043 Uiso 1 1 calc R U . . .
C38 C 0.6620(3) 0.70616(18) 0.15671(14) 0.0301(9) Uani 1 1 d . . . . .
C39 C 0.5894(3) 0.75297(17) 0.15694(14) 0.0297(9) Uani 1 1 d . . . . .
C40 C 0.4987(3) 0.73316(18) 0.13822(15) 0.0348(10) Uani 1 1 d . . . . .
H40 H 0.509378 0.720881 0.106169 0.042 Uiso 1 1 calc R U . . .
C41 C 0.5473(4) 0.6290(2) 0.16055(19) 0.0453(12) Uani 1 1 d . . . . .
H41A H 0.534304 0.592855 0.174776 0.054 Uiso 1 1 calc R U . . .
H41B H 0.556515 0.622794 0.127545 0.054 Uiso 1 1 calc R U . . .
C42 C 0.5825(3) 0.78235(19) 0.20314(15) 0.0357(10) Uani 1 1 d . . . . .
H42A H 0.562515 0.756108 0.226362 0.054 Uiso 1 1 calc R U . . .
H42B H 0.539653 0.812678 0.200891 0.054 Uiso 1 1 calc R U . . .
H42C H 0.641009 0.797006 0.211641 0.054 Uiso 1 1 calc R U . . .
C43 C 0.8549(4) 0.8013(3) 0.1681(2) 0.0629(16) Uani 1 1 d . . . . .
H43A H 0.861058 0.836683 0.152345 0.094 Uiso 1 1 calc R U . . .
H43B H 0.907349 0.778435 0.161991 0.094 Uiso 1 1 calc R U . . .
H43C H 0.849703 0.807669 0.200959 0.094 Uiso 1 1 calc R U . . .
C44 C 0.4262(3) 0.7783(2) 0.13605(18) 0.0428(11) Uani 1 1 d . . . . .
H44A H 0.455038 0.813678 0.128015 0.051 Uiso 1 1 calc R U . . .
H44B H 0.384333 0.768991 0.111148 0.051 Uiso 1 1 calc R U . . .
C45 C 0.3734(4) 0.7865(2) 0.17905(19) 0.0456(12) Uani 1 1 d . . . . .
H45 H 0.391706 0.766208 0.205085 0.055 Uiso 1 1 calc R U . . .
C46 C 0.3035(3) 0.8196(2) 0.1840(2) 0.0450(11) Uani 1 1 d . . . . .
C47 C 0.2531(4) 0.8218(3) 0.2282(2) 0.0590(15) Uani 1 1 d . . . . .
H47A H 0.253673 0.859538 0.239997 0.088 Uiso 1 1 calc R U . . .
H47B H 0.281248 0.797060 0.250295 0.088 Uiso 1 1 calc R U . . .
H47C H 0.191401 0.810107 0.223035 0.088 Uiso 1 1 calc R U . . .
C48 C 0.2706(5) 0.8560(3) 0.1461(3) 0.074(2) Uani 1 1 d . . . . .
H48A H 0.210311 0.844760 0.137427 0.111 Uiso 1 1 calc R U . . .
H48B H 0.310357 0.852624 0.119814 0.111 Uiso 1 1 calc R U . . .
H48C H 0.269728 0.894393 0.156531 0.111 Uiso 1 1 calc R U . . .
C49 C -0.0274(3) 0.65578(17) 0.32349(14) 0.0282(9) Uani 1 1 d . . . . .
C50 C -0.0641(3) 0.59913(17) 0.33801(16) 0.0334(9) Uani 1 1 d . . . . .
H50A H -0.031501 0.569804 0.321533 0.040 Uiso 1 1 calc R U . . .
H50B H -0.053711 0.593873 0.371024 0.040 Uiso 1 1 calc R U . . .
C51 C -0.1635(3) 0.59370(18) 0.32814(16) 0.0346(10) Uani 1 1 d . . . . .
H51A H -0.185270 0.558321 0.340692 0.041 Uiso 1 1 calc R U . . .
H51B H -0.172796 0.593014 0.294761 0.041 Uiso 1 1 calc R U . . .
C52 C -0.2175(3) 0.64095(18) 0.34868(16) 0.0339(9) Uani 1 1 d . . . . .
H52 H -0.278451 0.639150 0.335072 0.041 Uiso 1 1 calc R U . . .
C53 C -0.1781(3) 0.69686(17) 0.33594(14) 0.0292(9) Uani 1 1 d . . . . .
H53 H -0.183092 0.701204 0.302161 0.035 Uiso 1 1 calc R U . . .
C54 C -0.0787(3) 0.70218(17) 0.34886(13) 0.0259(8) Uani 1 1 d . . . . .
C55 C 0.0723(3) 0.65700(18) 0.33326(16) 0.0334(9) Uani 1 1 d . . . . .
H55A H 0.101020 0.625461 0.317702 0.040 Uiso 1 1 calc R U . . .
H55B H 0.081924 0.652558 0.366421 0.040 Uiso 1 1 calc R U . . .
C56 C 0.0594(3) 0.76609(18) 0.35028(15) 0.0311(9) Uani 1 1 d . . . . .
H56 H 0.069691 0.755037 0.382680 0.037 Uiso 1 1 calc R U . . .
C57 C -0.0414(3) 0.76176(17) 0.34110(13) 0.0274(8) Uani 1 1 d . . . . .
C58 C -0.0668(3) 0.78558(19) 0.29450(15) 0.0348(10) Uani 1 1 d . . . . .
H58A H -0.039582 0.763339 0.270367 0.052 Uiso 1 1 calc R U . . .
H58B H -0.045378 0.823636 0.292257 0.052 Uiso 1 1 calc R U . . .
H58C H -0.131719 0.785005 0.291093 0.052 Uiso 1 1 calc R U . . .
C59 C -0.3122(3) 0.7506(2) 0.33855(18) 0.0431(11) Uani 1 1 d . . . . .
H59A H -0.333963 0.786714 0.348615 0.065 Uiso 1 1 calc R U . . .
H59B H -0.352855 0.721809 0.349271 0.065 Uiso 1 1 calc R U . . .
H59C H -0.309402 0.749823 0.305205 0.065 Uiso 1 1 calc R U . . .
C60 C 0.0972(3) 0.82454(19) 0.34431(16) 0.0377(10) Uani 1 1 d . . . . .
H60A H 0.106775 0.831771 0.311480 0.045 Uiso 1 1 calc R U . . .
H60B H 0.053171 0.851639 0.355656 0.045 Uiso 1 1 calc R U . . .
C61 C 0.1840(3) 0.8323(2) 0.36948(17) 0.0392(10) Uani 1 1 d . . . . .
H61 H 0.208158 0.800852 0.384211 0.047 Uiso 1 1 calc R U . . .
C62 C 0.2298(3) 0.8789(2) 0.37302(19) 0.0422(11) Uani 1 1 d . . . . .
C63 C 0.3114(4) 0.8827(3) 0.4021(2) 0.0542(14) Uani 1 1 d . . . . .
H63A H 0.362949 0.891599 0.382948 0.081 Uiso 1 1 calc R U . . .
H63B H 0.321488 0.847355 0.417369 0.081 Uiso 1 1 calc R U . . .
H63C H 0.303341 0.911690 0.424977 0.081 Uiso 1 1 calc R U . . .
C64 C 0.2016(4) 0.9311(3) 0.3509(3) 0.081(3) Uani 1 1 d . . . . .
H64A H 0.254133 0.950764 0.339626 0.122 Uiso 1 1 calc R U . . .
H64B H 0.170149 0.954133 0.373069 0.122 Uiso 1 1 calc R U . . .
H64C H 0.161822 0.922722 0.325320 0.122 Uiso 1 1 calc R U . . .
C65 C -0.1139(3) 0.33509(18) -0.02061(14) 0.0309(9) Uani 1 1 d . . . . .
C66 C -0.1551(3) 0.38801(19) -0.00108(16) 0.0371(10) Uani 1 1 d . . . . .
H66A H -0.213669 0.394533 -0.015611 0.044 Uiso 1 1 calc R U . . .
H66B H -0.164978 0.383332 0.032037 0.044 Uiso 1 1 calc R U . . .
C67 C -0.0957(3) 0.43743(19) -0.00905(16) 0.0385(11) Uani 1 1 d . . . . .
H67A H -0.122833 0.470249 0.005386 0.046 Uiso 1 1 calc R U . . .
H67B H -0.091405 0.444548 -0.042186 0.046 Uiso 1 1 calc R U . . .
C68 C -0.0029(4) 0.42907(19) 0.01008(15) 0.0370(10) Uani 1 1 d . . . . .
C69 C 0.0374(3) 0.37500(18) -0.00764(14) 0.0309(9) Uani 1 1 d . . . . .
H69 H 0.045889 0.378589 -0.041300 0.037 Uiso 1 1 calc R U . . .
C70 C -0.0219(3) 0.32407(17) 0.00129(13) 0.0279(9) Uani 1 1 d . . . . .
C71 C 0.0244(3) 0.26830(17) -0.01300(15) 0.0316(9) Uani 1 1 d . . . . .
C72 C -0.0375(3) 0.21781(19) -0.00650(18) 0.0393(11) Uani 1 1 d . . . . .
H72 H -0.052954 0.215617 0.026588 0.047 Uiso 1 1 calc R U . . .
C73 C -0.1787(3) 0.2871(2) -0.01275(17) 0.0395(10) Uani 1 1 d . . . . .
H73A H -0.237537 0.296865 -0.025656 0.047 Uiso 1 1 calc R U . . .
H73B H -0.186393 0.281457 0.020426 0.047 Uiso 1 1 calc R U . . .
C74 C 0.0640(4) 0.2708(2) -0.06097(17) 0.0408(11) Uani 1 1 d . . . . .
H74A H 0.015878 0.274947 -0.083280 0.061 Uiso 1 1 calc R U . . .
H74B H 0.096754 0.236670 -0.067182 0.061 Uiso 1 1 calc R U . . .
H74C H 0.104561 0.302269 -0.063188 0.061 Uiso 1 1 calc R U . . .
C75 C 0.1911(4) 0.4027(2) 0.00187(19) 0.0463(12) Uani 1 1 d . . . . .
H75A H 0.249380 0.386303 0.008208 0.070 Uiso 1 1 calc R U . . .
H75B H 0.183327 0.435867 0.020525 0.070 Uiso 1 1 calc R U . . .
H75C H 0.187390 0.412596 -0.030445 0.070 Uiso 1 1 calc R U . . .
C76 C 0.0086(4) 0.1632(2) -0.0196(3) 0.0647(19) Uani 1 1 d . . . . .
H76A H 0.074147 0.167314 -0.018984 0.078 Uiso 1 1 calc R U . A 1
H76B H -0.009681 0.151311 -0.050517 0.078 Uiso 1 1 calc R U . A 1
C77A C -0.0243(14) 0.1185(6) 0.0188(6) 0.045(6) Uani 0.305(19) 1 d . . P B 1
C77B C -0.0533(6) 0.1126(3) -0.0168(3) 0.049(3) Uani 0.695(19) 1 d . . P B 2
C78 C -0.0382(5) 0.0689(2) 0.0072(2) 0.0580(16) Uani 1 1 d . . . . .
C79 C 0.0559(9) 0.0611(4) 0.0334(3) 0.124(5) Uani 1 1 d . . . . .
H79A H 0.045082 0.056439 0.066118 0.186 Uiso 1 1 calc R U . B 1
H79B H 0.093226 0.093669 0.028455 0.186 Uiso 1 1 calc R U . B 1
H79C H 0.086409 0.028384 0.021537 0.186 Uiso 1 1 calc R U . B 1
C80 C -0.0943(7) 0.0224(3) 0.0185(5) 0.123(5) Uani 1 1 d . . . . .
H80A H -0.111519 0.024524 0.050622 0.184 Uiso 1 1 calc R U . . .
H80B H -0.061499 -0.011894 0.013057 0.184 Uiso 1 1 calc R U . . .
H80C H -0.147767 0.023105 -0.000632 0.184 Uiso 1 1 calc R U . . .
C81 C 0.1238(3) 0.48029(18) 0.14788(14) 0.0319(9) Uani 1 1 d . . . . .
C82 C 0.0299(3) 0.4820(2) 0.16757(18) 0.0411(11) Uani 1 1 d . . . . .
H82A H -0.007397 0.454274 0.151796 0.049 Uiso 1 1 calc R U . . .
H82B H 0.032259 0.471968 0.200250 0.049 Uiso 1 1 calc R U . . .
C83 C -0.0121(4) 0.5376(2) 0.1627(2) 0.0489(13) Uani 1 1 d . . . . .
H83A H -0.071126 0.537365 0.177735 0.059 Uiso 1 1 calc R U . . .
H83B H -0.021431 0.545622 0.129969 0.059 Uiso 1 1 calc R U . . .
C84 C 0.0452(4) 0.5830(2) 0.18365(17) 0.0418(11) Uani 1 1 d . . . . .
H84 H 0.019586 0.619220 0.174079 0.050 Uiso 1 1 calc R U . . .
C85 C 0.1424(3) 0.58047(18) 0.16626(15) 0.0343(10) Uani 1 1 d . . . . .
H85 H 0.142524 0.589128 0.132951 0.041 Uiso 1 1 calc R U . . .
C86 C 0.1842(3) 0.52286(17) 0.17311(13) 0.0285(9) Uani 1 1 d . . . . .
C87 C 0.2859(3) 0.52025(17) 0.15986(14) 0.0297(9) Uani 1 1 d . . . . .
C88 C 0.3236(3) 0.46080(18) 0.16437(17) 0.0337(9) Uani 1 1 d . . . . .
H88 H 0.314233 0.448710 0.196579 0.040 Uiso 1 1 calc R U . . .
C89 C 0.1580(3) 0.42169(19) 0.15226(17) 0.0380(10) Uani 1 1 d . . . . .
H89A H 0.115688 0.396426 0.137008 0.046 Uiso 1 1 calc R U . . .
H89B H 0.160104 0.411591 0.184916 0.046 Uiso 1 1 calc R U . . .
C90 C 0.3049(4) 0.5460(2) 0.11321(15) 0.0376(10) Uani 1 1 d . . . . .
H90A H 0.273844 0.524983 0.089528 0.056 Uiso 1 1 calc R U . . .
H90B H 0.369149 0.545158 0.107327 0.056 Uiso 1 1 calc R U . . .
H90C H 0.283987 0.584220 0.112929 0.056 Uiso 1 1 calc R U . . .
C91 C 0.1757(5) 0.6756(2) 0.1815(2) 0.0590(16) Uani 1 1 d . . . . .
H91A H 0.225702 0.699199 0.190488 0.089 Uiso 1 1 calc R U . . .
H91B H 0.123196 0.685049 0.199721 0.089 Uiso 1 1 calc R U . . .
H91C H 0.162523 0.681327 0.149145 0.089 Uiso 1 1 calc R U . . .
C92 C 0.4242(4) 0.4573(2) 0.1545(2) 0.0527(15) Uani 1 1 d . . . . .
H92A H 0.435783 0.471778 0.123515 0.063 Uiso 1 1 calc R U . . .
H92B H 0.456529 0.480867 0.176446 0.063 Uiso 1 1 calc R U . . .
C93 C 0.4595(4) 0.3993(2) 0.1576(2) 0.0510(14) Uani 1 1 d . . . . .
H93 H 0.437874 0.373980 0.135612 0.061 Uiso 1 1 calc R U . . .
C94 C 0.5171(4) 0.3797(2) 0.1875(2) 0.0464(12) Uani 1 1 d . . . . .
C95 C 0.5574(6) 0.4118(3) 0.2257(3) 0.080(2) Uani 1 1 d . . . . .
H95A H 0.559605 0.388736 0.253105 0.120 Uiso 1 1 calc R U . . .
H95B H 0.521143 0.444543 0.231729 0.120 Uiso 1 1 calc R U . . .
H95C H 0.617900 0.423060 0.217360 0.120 Uiso 1 1 calc R U . . .
C96 C 0.5469(4) 0.3209(2) 0.1847(2) 0.0536(14) Uani 1 1 d . . . . .
H96A H 0.611020 0.319560 0.178713 0.080 Uiso 1 1 calc R U . . .
H96B H 0.514902 0.302202 0.160051 0.080 Uiso 1 1 calc R U . . .
H96C H 0.534150 0.302304 0.213672 0.080 Uiso 1 1 calc R U . . .
S4 S 0.12451(8) 0.71999(5) 0.31468(4) 0.0373(2) Uani 1 1 d . . . . .
O4 O 0.3092(2) 0.25638(15) 0.47077(11) 0.0394(7) Uani 1 1 d . . . . .
H4 H 0.284720 0.287410 0.468684 0.059 Uiso 1 1 calc R U . . .
C4 C 0.5239(6) 0.4096(2) 0.5328(2) 0.078(3) Uani 1 1 d . . . . .
H4A H 0.563068 0.440777 0.524414 0.094 Uiso 1 1 calc R U . . .
H4B H 0.508565 0.413268 0.565418 0.094 Uiso 1 1 calc R U . . .
S5 S 0.26645(9) 0.41230(5) 0.12797(5) 0.0415(3) Uani 1 1 d . . . . .
O5 O 0.4615(4) 0.41842(18) 0.45658(14) 0.0741(15) Uani 1 1 d . . . . .
H5 H 0.505572 0.398484 0.450353 0.111 Uiso 1 1 calc R U . . .
C5 C 0.5731(5) 0.3562(3) 0.52541(19) 0.0607(18) Uani 1 1 d . . . . .
H5A H 0.626866 0.355721 0.544948 0.073 Uiso 1 1 calc R U . . .
H5B H 0.592958 0.354132 0.493293 0.073 Uiso 1 1 calc R U . . .
S6 S -0.14127(10) 0.22383(5) -0.03808(5) 0.0486(3) Uani 1 1 d . . . . .
O6 O 0.5604(3) 0.57145(16) 0.27138(12) 0.0445(8) Uani 1 1 d . . . . .
H6 H 0.520198 0.551031 0.260825 0.067 Uiso 1 1 calc R U . . .
C6 C 0.5161(3) 0.3054(2) 0.53629(15) 0.0382(11) Uani 1 1 d . . . . .
O7 O 0.4018(2) 0.62575(13) 0.29964(11) 0.0384(8) Uani 1 1 d . . . . .
H7 H 0.082(6) 0.473(3) 0.085(3) 0.09(3) Uiso 1 1 d . . . . .
C7 C 0.5706(4) 0.2529(3) 0.5307(2) 0.0498(13) Uani 1 1 d . . . . .
H7A H 0.623404 0.254803 0.550820 0.060 Uiso 1 1 calc R U . . .
H7B H 0.591942 0.250371 0.498868 0.060 Uiso 1 1 calc R U . . .
 
loop_
 _atom_site_aniso_label
 _atom_site_aniso_U_11
 _atom_site_aniso_U_22
 _atom_site_aniso_U_33
 _atom_site_aniso_U_23
 _atom_site_aniso_U_13
 _atom_site_aniso_U_12
O8 0.0322(16) 0.0326(15) 0.0240(14) 0.0012(11) -0.0044(12) -0.0007(12)
C8 0.057(3) 0.029(2) 0.045(3) 0.000(2) -0.007(2) -0.003(2)
O9 0.048(2) 0.0410(17) 0.0255(15) 0.0090(13) -0.0073(14) -0.0077(15)
C9 0.032(2) 0.040(2) 0.032(2) -0.0026(18) 0.0012(19) -0.004(2)
O10 0.0373(18) 0.0320(15) 0.0263(14) 0.0045(12) -0.0085(12) -0.0026(13)
C10 0.045(3) 0.079(4) 0.037(3) 0.004(3) 0.006(2) -0.009(3)
O11 0.049(2) 0.072(3) 0.0400(19) 0.0127(18) 0.0185(17) 0.021(2)
C11 0.104(6) 0.080(5) 0.062(4) -0.014(4) -0.016(4) 0.054(5)
S1 0.0705(10) 0.0361(6) 0.0593(8) 0.0012(6) -0.0192(7) 0.0101(6)
O1 0.058(2) 0.0402(17) 0.0249(14) 0.0016(13) -0.0083(14) -0.0041(16)
C1 0.042(3) 0.033(2) 0.0206(18) -0.0018(16) 0.0005(17) -0.0005(19)
O12 0.0331(18) 0.0517(19) 0.0402(17) 0.0145(15) -0.0028(14) -0.0027(15)
C12 0.077(5) 0.041(3) 0.075(4) 0.004(3) -0.014(4) -0.018(3)
O13 0.049(2) 0.0316(15) 0.0236(14) 0.0036(12) 0.0075(13) 0.0094(14)
C13 0.065(4) 0.044(3) 0.074(4) -0.003(3) 0.007(3) -0.004(3)
O14 0.048(2) 0.0418(17) 0.0270(15) 0.0104(13) 0.0139(14) 0.0079(15)
C14 0.061(4) 0.050(3) 0.071(4) -0.002(3) 0.002(3) -0.004(3)
O15 0.0346(17) 0.0317(15) 0.0260(13) 0.0079(12) 0.0000(12) 0.0018(12)
C15 0.074(5) 0.052(4) 0.090(5) -0.015(3) 0.009(4) -0.003(3)
O16 0.0299(16) 0.0303(15) 0.0313(14) -0.0087(12) 0.0002(12) 0.0010(12)
C16 0.077(6) 0.076(5) 0.150(9) -0.040(6) 0.029(6) -0.024(4)
O17 0.0404(18) 0.0326(15) 0.0242(14) -0.0064(12) 0.0029(13) 0.0004(13)
C17 0.036(2) 0.029(2) 0.0202(18) 0.0021(15) -0.0033(16) -0.0058(17)
O18 0.0337(16) 0.0305(14) 0.0226(13) -0.0016(11) 0.0003(12) 0.0023(12)
C18 0.045(3) 0.032(2) 0.028(2) 0.0040(17) -0.0082(19) -0.011(2)
O19 0.0295(16) 0.0361(16) 0.0372(16) -0.0057(13) -0.0042(13) 0.0067(13)
C19 0.039(3) 0.046(3) 0.036(2) 0.009(2) -0.007(2) -0.018(2)
O20 0.0376(18) 0.0448(18) 0.0371(17) 0.0005(14) 0.0127(14) -0.0022(15)
C20 0.035(3) 0.054(3) 0.043(3) 0.012(2) -0.011(2) -0.014(2)
S2 0.0424(7) 0.0429(6) 0.0443(6) 0.0182(5) -0.0084(5) -0.0158(5)
O2 0.0372(18) 0.0478(18) 0.0230(14) -0.0007(13) -0.0032(13) -0.0100(14)
C2 0.075(4) 0.032(2) 0.029(2) -0.0046(18) -0.013(2) 0.013(2)
O21 0.052(2) 0.0261(15) 0.0408(17) -0.0022(13) -0.0074(16) 0.0061(14)
C21 0.038(3) 0.048(3) 0.035(2) 0.014(2) -0.008(2) -0.001(2)
O22 0.044(2) 0.057(2) 0.0366(17) -0.0173(16) 0.0032(15) 0.0130(17)
C22 0.036(2) 0.032(2) 0.026(2) 0.0067(16) -0.0066(17) -0.0074(18)
O23 0.048(2) 0.0461(18) 0.0273(15) -0.0102(14) -0.0077(14) 0.0091(16)
C23 0.046(3) 0.029(2) 0.039(2) 0.0104(18) -0.008(2) -0.004(2)
O24 0.0298(16) 0.0369(16) 0.0253(14) -0.0006(12) -0.0025(12) -0.0034(13)
C24 0.033(2) 0.039(2) 0.031(2) 0.0095(18) -0.0027(18) -0.0063(19)
O25 0.0346(17) 0.0317(15) 0.0349(16) 0.0049(13) -0.0063(13) -0.0017(13)
C25 0.035(2) 0.035(2) 0.0240(19) 0.0033(17) -0.0030(17) -0.0017(18)
O26 0.057(2) 0.0433(18) 0.0327(16) -0.0111(14) -0.0107(16) 0.0030(17)
C26 0.041(3) 0.044(3) 0.032(2) -0.0030(19) 0.000(2) 0.001(2)
O27 0.0326(17) 0.0397(17) 0.0404(17) 0.0078(14) -0.0069(14) -0.0037(14)
C27 0.066(4) 0.028(2) 0.055(3) 0.005(2) -0.003(3) -0.010(2)
O28 0.0339(17) 0.0418(17) 0.0237(14) 0.0062(12) -0.0012(12) 0.0068(14)
C28 0.036(3) 0.047(3) 0.038(2) 0.000(2) 0.001(2) -0.005(2)
O29 0.0431(19) 0.0389(17) 0.0253(14) -0.0018(13) -0.0083(13) -0.0014(14)
C29 0.040(3) 0.059(3) 0.042(3) -0.004(2) -0.003(2) -0.009(2)
O30 0.0357(18) 0.0395(18) 0.0441(18) 0.0146(15) 0.0034(15) 0.0050(14)
C30 0.037(3) 0.042(3) 0.067(3) -0.003(2) -0.002(3) -0.004(2)
C31 0.071(5) 0.076(5) 0.095(5) -0.014(4) 0.032(4) -0.023(4)
S3 0.0405(7) 0.0459(7) 0.0538(7) 0.0076(5) 0.0070(6) -0.0067(5)
O3 0.074(3) 0.056(2) 0.0393(19) -0.0107(17) -0.0106(19) 0.032(2)
C3 0.122(6) 0.034(3) 0.042(3) 0.003(2) -0.029(3) -0.008(3)
C32 0.038(4) 0.095(6) 0.125(7) -0.041(5) 0.003(4) -0.022(4)
C33 0.053(3) 0.032(2) 0.026(2) 0.0060(17) 0.012(2) 0.008(2)
C34 0.077(4) 0.034(2) 0.042(3) 0.010(2) 0.019(3) 0.018(3)
C35 0.050(3) 0.058(3) 0.041(3) 0.015(2) 0.009(2) 0.027(3)
C36 0.041(3) 0.058(3) 0.032(2) 0.011(2) 0.009(2) 0.020(2)
C37 0.037(3) 0.041(2) 0.028(2) 0.0078(18) 0.0049(18) 0.009(2)
C38 0.035(2) 0.033(2) 0.0223(18) 0.0040(16) 0.0061(16) 0.0069(18)
C39 0.035(2) 0.029(2) 0.0246(19) 0.0067(16) 0.0033(17) 0.0048(18)
C40 0.037(3) 0.036(2) 0.031(2) 0.0030(17) 0.0029(18) 0.0035(19)
C41 0.058(3) 0.030(2) 0.047(3) 0.006(2) 0.009(2) -0.001(2)
C42 0.043(3) 0.036(2) 0.028(2) -0.0001(18) 0.0036(19) 0.010(2)
C43 0.047(3) 0.072(4) 0.070(4) 0.012(3) -0.016(3) -0.009(3)
C44 0.031(3) 0.054(3) 0.043(3) 0.009(2) -0.001(2) 0.008(2)
C45 0.035(3) 0.053(3) 0.049(3) 0.005(2) 0.002(2) 0.010(2)
C46 0.035(3) 0.046(3) 0.054(3) -0.003(2) 0.000(2) 0.000(2)
C47 0.041(3) 0.071(4) 0.064(4) -0.005(3) 0.008(3) 0.014(3)
C48 0.065(4) 0.082(5) 0.075(4) 0.008(4) 0.001(4) 0.032(4)
C49 0.032(2) 0.0276(19) 0.0245(19) -0.0023(16) 0.0023(17) 0.0029(17)
C50 0.039(3) 0.028(2) 0.034(2) -0.0007(17) 0.0050(19) 0.0028(18)
C51 0.035(2) 0.031(2) 0.037(2) -0.0017(18) 0.0050(19) -0.0054(18)
C52 0.030(2) 0.036(2) 0.036(2) -0.0010(18) -0.0013(18) -0.0027(18)
C53 0.030(2) 0.031(2) 0.0268(19) -0.0053(16) -0.0030(17) 0.0022(17)
C54 0.029(2) 0.029(2) 0.0190(17) -0.0015(15) -0.0008(15) 0.0021(16)
C55 0.033(2) 0.030(2) 0.037(2) -0.0015(18) 0.0031(19) 0.0038(18)
C56 0.031(2) 0.032(2) 0.030(2) -0.0058(17) 0.0032(17) -0.0010(17)
C57 0.032(2) 0.0275(19) 0.0230(18) -0.0019(15) -0.0028(16) 0.0017(16)
C58 0.041(3) 0.033(2) 0.030(2) 0.0044(17) -0.0052(18) -0.0011(19)
C59 0.032(3) 0.048(3) 0.049(3) 0.000(2) -0.006(2) 0.009(2)
C60 0.040(3) 0.037(2) 0.036(2) -0.0017(19) 0.001(2) -0.007(2)
C61 0.040(3) 0.037(2) 0.041(2) -0.0045(19) 0.001(2) -0.003(2)
C62 0.030(2) 0.041(3) 0.056(3) -0.008(2) 0.009(2) -0.004(2)
C63 0.043(3) 0.056(3) 0.064(3) -0.019(3) 0.004(3) -0.012(3)
C64 0.044(4) 0.044(3) 0.156(8) 0.016(4) -0.018(4) -0.016(3)
C65 0.037(2) 0.029(2) 0.027(2) 0.0003(16) -0.0037(18) 0.0012(18)
C66 0.039(3) 0.039(2) 0.033(2) -0.0063(19) -0.0069(19) 0.010(2)
C67 0.047(3) 0.030(2) 0.039(2) -0.0022(18) -0.011(2) 0.009(2)
C68 0.048(3) 0.032(2) 0.031(2) -0.0042(17) -0.010(2) 0.000(2)
C69 0.036(2) 0.030(2) 0.0267(19) 0.0036(16) -0.0062(18) 0.0000(18)
C70 0.033(2) 0.028(2) 0.0230(19) 0.0030(15) 0.0025(16) -0.0010(17)
C71 0.032(2) 0.028(2) 0.035(2) 0.0017(17) 0.0042(18) 0.0013(17)
C72 0.036(3) 0.029(2) 0.053(3) 0.006(2) 0.008(2) 0.0001(19)
C73 0.036(3) 0.036(2) 0.046(3) 0.004(2) -0.005(2) 0.001(2)
C74 0.047(3) 0.034(2) 0.041(3) -0.0022(19) 0.013(2) -0.003(2)
C75 0.040(3) 0.052(3) 0.047(3) 0.004(2) 0.000(2) -0.011(2)
C76 0.052(4) 0.025(2) 0.118(6) -0.001(3) 0.028(4) -0.004(2)
C77A 0.069(13) 0.026(8) 0.039(11) 0.003(6) 0.009(9) 0.005(7)
C77B 0.052(5) 0.027(4) 0.067(7) 0.000(3) 0.022(4) 0.003(3)
C78 0.091(5) 0.037(3) 0.046(3) -0.009(2) 0.018(3) -0.010(3)
C79 0.194(13) 0.084(6) 0.093(6) 0.015(5) -0.066(8) -0.031(7)
C80 0.103(7) 0.035(3) 0.230(13) 0.027(5) 0.068(8) 0.002(4)
C81 0.031(2) 0.036(2) 0.028(2) -0.0068(17) -0.0038(18) 0.0030(19)
C82 0.030(2) 0.051(3) 0.042(2) -0.015(2) -0.001(2) -0.001(2)
C83 0.036(3) 0.058(3) 0.053(3) -0.019(3) -0.008(2) 0.012(2)
C84 0.043(3) 0.045(3) 0.037(2) -0.011(2) -0.006(2) 0.017(2)
C85 0.044(3) 0.033(2) 0.0261(19) -0.0032(17) -0.0045(19) 0.0092(19)
C86 0.034(2) 0.030(2) 0.0218(19) -0.0009(15) -0.0006(17) 0.0057(17)
C87 0.033(2) 0.029(2) 0.027(2) 0.0025(16) -0.0029(17) 0.0020(17)
C88 0.029(2) 0.029(2) 0.043(2) 0.0060(18) 0.0045(19) 0.0022(17)
C89 0.036(3) 0.035(2) 0.043(2) -0.0071(19) 0.004(2) -0.0016(19)
C90 0.044(3) 0.037(2) 0.032(2) 0.0050(18) 0.007(2) 0.004(2)
C91 0.075(4) 0.032(3) 0.070(4) 0.000(2) 0.000(3) 0.011(3)
C92 0.032(3) 0.040(3) 0.086(4) 0.018(3) 0.011(3) 0.007(2)
C93 0.036(3) 0.040(3) 0.077(4) 0.006(3) 0.013(3) 0.007(2)
C94 0.045(3) 0.042(3) 0.053(3) 0.008(2) 0.017(2) 0.011(2)
C95 0.107(6) 0.060(4) 0.073(4) -0.014(3) -0.011(4) 0.028(4)
C96 0.053(3) 0.044(3) 0.064(3) 0.015(3) 0.016(3) 0.016(2)
S4 0.0316(6) 0.0397(6) 0.0407(5) -0.0074(5) 0.0096(5) -0.0029(5)
O4 0.0326(18) 0.0503(19) 0.0354(16) -0.0050(14) -0.0034(14) -0.0024(15)
C4 0.136(7) 0.043(3) 0.055(4) 0.017(3) -0.041(4) -0.042(4)
S5 0.0397(7) 0.0319(5) 0.0528(7) -0.0065(5) 0.0060(5) 0.0066(5)
O5 0.127(5) 0.051(2) 0.044(2) 0.0235(19) -0.030(3) -0.023(3)
C5 0.067(4) 0.077(4) 0.038(3) 0.014(3) -0.022(3) -0.043(3)
S6 0.0474(8) 0.0355(6) 0.0628(8) -0.0068(6) -0.0003(6) -0.0085(5)
O6 0.045(2) 0.052(2) 0.0365(17) 0.0119(15) 0.0034(15) -0.0102(16)
C6 0.045(3) 0.042(2) 0.028(2) 0.0039(18) -0.0099(19) -0.014(2)
O7 0.051(2) 0.0268(15) 0.0374(16) 0.0062(13) -0.0085(15) -0.0081(14)
C7 0.037(3) 0.064(3) 0.049(3) -0.002(3) -0.008(2) 0.007(3)
 
_geom_special_details
;
 All esds (except the esd in the dihedral angle between two l.s. planes)
 are estimated using the full covariance matrix.  The cell esds are taken
 into account individually in the estimation of esds in distances, angles
 and torsion angles; correlations between esds in cell parameters are only
 used when they are defined by crystal symmetry.  An approximate (isotropic)
 treatment of cell esds is used for estimating esds involving l.s. planes.
;
 
loop_
 _geom_bond_atom_site_label_1
 _geom_bond_atom_site_label_2
 _geom_bond_distance
 _geom_bond_site_symmetry_2
 _geom_bond_publ_flag
O8 C17 1.446(5) . ?
C8 C12 1.522(7) . ?
C8 C9 1.555(7) . ?
C8 S1 1.814(6) . ?
O9 C22 1.423(5) . ?
C9 O4 1.440(6) . ?
C9 C10 1.519(7) . ?
C9 C1 1.577(6) . ?
O10 C25 1.452(5) . ?
O11 C36 1.434(6) . ?
C11 O3 1.427(7) . ?
S1 C7 1.796(6) . ?
O1 C6 1.432(6) . ?
C1 O2 1.436(5) . ?
C1 C6 1.554(6) . ?
C1 C2 1.559(6) . ?
O12 C43 1.422(7) . ?
O12 C37 1.430(5) . ?
C12 C13 1.566(9) . ?
O13 C38 1.443(5) . ?
C13 C14 1.317(9) . ?
O14 C33 1.428(5) . ?
C14 C16 1.490(11) . ?
C14 C15 1.510(9) . ?
O15 C39 1.450(5) . ?
O16 C57 1.449(5) . ?
O17 C49 1.430(5) . ?
C17 C18 1.554(6) . ?
C17 C22 1.556(6) . ?
C17 C25 1.570(6) . ?
O18 C54 1.453(5) . ?
C18 O7 1.435(5) . ?
C18 C19 1.531(7) . ?
O19 C59 1.424(6) . ?
O19 C53 1.431(5) . ?
C19 O6 1.429(6) . ?
C19 C20 1.527(7) . ?
O20 C52 1.436(5) . ?
C20 C21 1.517(7) . ?
S2 C23 1.806(5) . ?
S2 C24 1.816(4) . ?
C2 O3 1.424(7) . ?
C2 C3 1.517(9) . ?
O21 C91 1.427(6) . ?
O21 C85 1.430(6) . ?
C21 C22 1.538(7) . ?
O22 C84 1.422(6) . ?
C22 C23 1.540(6) . ?
O23 C81 1.428(5) . ?
O24 C86 1.432(5) . ?
C24 C28 1.533(7) . ?
C24 C25 1.542(6) . ?
O25 C87 1.456(5) . ?
C25 C26 1.536(6) . ?
O26 C68 1.441(5) . ?
O27 C75 1.426(6) . ?
O27 C69 1.437(5) . ?
C27 O7 1.433(6) . ?
O28 C70 1.438(5) . ?
C28 C29 1.486(7) . ?
O29 C65 1.439(5) . ?
C29 C30 1.319(8) . ?
O30 C71 1.452(6) . ?
C30 C31 1.498(9) . ?
C30 C32 1.501(8) . ?
S3 C41 1.804(6) . ?
S3 C40 1.820(5) . ?
C3 O5 1.454(8) . ?
C3 C4 1.521(10) . ?
C33 C41 1.526(8) . ?
C33 C34 1.542(7) . ?
C33 C38 1.554(6) . ?
C34 C35 1.521(9) . ?
C35 C36 1.507(8) . ?
C36 C37 1.540(6) . ?
C37 C38 1.548(7) . ?
C38 C39 1.574(6) . ?
C39 C42 1.536(6) . ?
C39 C40 1.545(7) . ?
C40 C44 1.546(6) . ?
C44 C45 1.503(7) . ?
C45 C46 1.330(7) . ?
C46 C48 1.502(9) . ?
C46 C47 1.504(8) . ?
C49 C55 1.524(6) . ?
C49 C50 1.541(6) . ?
C49 C54 1.554(5) . ?
C50 C51 1.525(7) . ?
C51 C52 1.528(6) . ?
C52 C53 1.527(6) . ?
C53 C54 1.545(6) . ?
C54 C57 1.567(6) . ?
C55 S4 1.803(5) . ?
C56 C60 1.537(6) . ?
C56 C57 1.542(6) . ?
C56 S4 1.816(4) . ?
C57 C58 1.533(5) . ?
C60 C61 1.511(7) . ?
C61 C62 1.327(7) . ?
C62 C64 1.484(9) . ?
C62 C63 1.496(8) . ?
C65 C73 1.535(6) . ?
C65 C66 1.536(6) . ?
C65 C70 1.547(6) . ?
C66 C67 1.513(7) . ?
C67 C68 1.516(7) . ?
C68 C69 1.536(6) . ?
C69 C70 1.546(6) . ?
C70 C71 1.579(6) . ?
C71 C74 1.529(6) . ?
C71 C72 1.550(6) . ?
C72 C76 1.544(7) . ?
C72 S6 1.819(5) . ?
C73 S6 1.796(5) . ?
C76 C77B 1.541(9) . ?
C76 C77A 1.640(17) . ?
C77A C78 1.267(18) . ?
C77A C79 1.89(2) . ?
C77B C78 1.293(10) . ?
C78 C80 1.446(9) . ?
C78 C79 1.621(13) . ?
C81 C89 1.517(6) . ?
C81 C82 1.524(7) . ?
C81 C86 1.562(6) . ?
C82 C83 1.498(7) . ?
C83 C84 1.526(7) . ?
C84 C85 1.548(7) . ?
C85 C86 1.546(6) . ?
C86 C87 1.576(6) . ?
C87 C90 1.532(6) . ?
C87 C88 1.556(6) . ?
C88 C92 1.539(7) . ?
C88 S5 1.807(5) . ?
C89 S5 1.792(5) . ?
C92 C93 1.506(7) . ?
C93 C94 1.320(8) . ?
C94 C95 1.494(10) . ?
C94 C96 1.498(7) . ?
C4 C5 1.508(11) . ?
C5 C6 1.534(7) . ?
C6 C7 1.524(8) . ?
 
loop_
 _geom_angle_atom_site_label_1
 _geom_angle_atom_site_label_2
 _geom_angle_atom_site_label_3
 _geom_angle
 _geom_angle_site_symmetry_1
 _geom_angle_site_symmetry_3
 _geom_angle_publ_flag
C12 C8 C9 115.0(5) . . ?
C12 C8 S1 107.6(4) . . ?
C9 C8 S1 112.4(3) . . ?
O4 C9 C10 109.0(4) . . ?
O4 C9 C8 102.2(4) . . ?
C10 C9 C8 112.5(4) . . ?
O4 C9 C1 107.7(4) . . ?
C10 C9 C1 114.4(4) . . ?
C8 C9 C1 110.3(4) . . ?
C7 S1 C8 97.4(2) . . ?
O2 C1 C6 104.7(4) . . ?
O2 C1 C2 109.2(4) . . ?
C6 C1 C2 108.9(4) . . ?
O2 C1 C9 107.8(3) . . ?
C6 C1 C9 115.3(4) . . ?
C2 C1 C9 110.6(4) . . ?
C43 O12 C37 115.8(4) . . ?
C8 C12 C13 109.1(6) . . ?
C14 C13 C12 125.6(7) . . ?
C13 C14 C16 123.4(7) . . ?
C13 C14 C15 122.0(7) . . ?
C16 C14 C15 114.6(6) . . ?
O8 C17 C18 108.6(3) . . ?
O8 C17 C22 105.2(3) . . ?
C18 C17 C22 107.6(3) . . ?
O8 C17 C25 108.5(3) . . ?
C18 C17 C25 111.9(4) . . ?
C22 C17 C25 114.6(3) . . ?
O7 C18 C19 111.5(4) . . ?
O7 C18 C17 106.7(3) . . ?
C19 C18 C17 112.7(4) . . ?
C59 O19 C53 114.5(3) . . ?
O6 C19 C20 111.2(5) . . ?
O6 C19 C18 112.3(4) . . ?
C20 C19 C18 110.7(4) . . ?
C21 C20 C19 111.3(4) . . ?
C23 S2 C24 97.0(2) . . ?
O3 C2 C3 111.0(4) . . ?
O3 C2 C1 107.9(4) . . ?
C3 C2 C1 112.7(5) . . ?
C91 O21 C85 114.7(4) . . ?
C20 C21 C22 112.0(4) . . ?
O9 C22 C21 108.9(4) . . ?
O9 C22 C23 111.4(4) . . ?
C21 C22 C23 108.6(4) . . ?
O9 C22 C17 107.3(4) . . ?
C21 C22 C17 110.2(4) . . ?
C23 C22 C17 110.4(3) . . ?
C22 C23 S2 112.3(3) . . ?
C28 C24 C25 112.0(4) . . ?
C28 C24 S2 108.4(3) . . ?
C25 C24 S2 112.8(3) . . ?
O10 C25 C26 109.0(4) . . ?
O10 C25 C24 101.7(3) . . ?
C26 C25 C24 112.4(4) . . ?
O10 C25 C17 107.5(3) . . ?
C26 C25 C17 113.1(4) . . ?
C24 C25 C17 112.3(4) . . ?
C75 O27 C69 115.4(4) . . ?
C29 C28 C24 114.1(4) . . ?
C30 C29 C28 128.1(5) . . ?
C29 C30 C31 124.7(6) . . ?
C29 C30 C32 121.8(6) . . ?
C31 C30 C32 113.5(6) . . ?
C41 S3 C40 96.9(2) . . ?
C2 O3 C11 116.2(5) . . ?
O5 C3 C2 111.7(4) . . ?
O5 C3 C4 109.8(7) . . ?
C2 C3 C4 110.8(5) . . ?
O14 C33 C41 111.5(4) . . ?
O14 C33 C34 108.1(4) . . ?
C41 C33 C34 109.4(4) . . ?
O14 C33 C38 106.6(4) . . ?
C41 C33 C38 111.5(4) . . ?
C34 C33 C38 109.6(4) . . ?
C35 C34 C33 111.2(4) . . ?
C36 C35 C34 111.9(4) . . ?
O11 C36 C35 111.6(5) . . ?
O11 C36 C37 110.9(4) . . ?
C35 C36 C37 109.0(4) . . ?
O12 C37 C36 110.6(4) . . ?
O12 C37 C38 106.7(3) . . ?
C36 C37 C38 114.0(4) . . ?
O13 C38 C37 108.5(3) . . ?
O13 C38 C33 104.5(3) . . ?
C37 C38 C33 109.0(4) . . ?
O13 C38 C39 107.9(3) . . ?
C37 C38 C39 112.4(4) . . ?
C33 C38 C39 114.1(4) . . ?
O15 C39 C42 107.9(3) . . ?
O15 C39 C40 102.2(3) . . ?
C42 C39 C40 113.5(4) . . ?
O15 C39 C38 107.1(3) . . ?
C42 C39 C38 112.7(4) . . ?
C40 C39 C38 112.6(4) . . ?
C39 C40 C44 114.5(4) . . ?
C39 C40 S3 113.7(3) . . ?
C44 C40 S3 108.3(3) . . ?
C33 C41 S3 112.4(3) . . ?
C45 C44 C40 115.5(4) . . ?
C46 C45 C44 125.9(5) . . ?
C45 C46 C48 122.3(6) . . ?
C45 C46 C47 120.8(5) . . ?
C48 C46 C47 116.9(5) . . ?
O17 C49 C55 110.8(4) . . ?
O17 C49 C50 109.4(3) . . ?
C55 C49 C50 108.5(4) . . ?
O17 C49 C54 106.0(3) . . ?
C55 C49 C54 112.5(3) . . ?
C50 C49 C54 109.6(3) . . ?
C51 C50 C49 112.0(4) . . ?
C50 C51 C52 112.3(4) . . ?
O20 C52 C53 112.1(4) . . ?
O20 C52 C51 111.5(4) . . ?
C53 C52 C51 111.3(4) . . ?
O19 C53 C52 111.7(4) . . ?
O19 C53 C54 108.3(3) . . ?
C52 C53 C54 112.9(4) . . ?
O18 C54 C53 109.1(3) . . ?
O18 C54 C49 104.6(3) . . ?
C53 C54 C49 107.5(3) . . ?
O18 C54 C57 107.6(3) . . ?
C53 C54 C57 112.8(3) . . ?
C49 C54 C57 114.9(3) . . ?
C49 C55 S4 112.7(3) . . ?
C60 C56 C57 113.9(4) . . ?
C60 C56 S4 107.7(3) . . ?
C57 C56 S4 112.7(3) . . ?
O16 C57 C58 109.1(3) . . ?
O16 C57 C56 102.5(3) . . ?
C58 C57 C56 112.0(4) . . ?
O16 C57 C54 106.8(3) . . ?
C58 C57 C54 112.9(3) . . ?
C56 C57 C54 112.9(3) . . ?
C61 C60 C56 112.2(4) . . ?
C62 C61 C60 126.3(5) . . ?
C61 C62 C64 122.9(5) . . ?
C61 C62 C63 121.4(5) . . ?
C64 C62 C63 115.6(5) . . ?
O29 C65 C73 110.0(4) . . ?
O29 C65 C66 108.7(4) . . ?
C73 C65 C66 108.8(4) . . ?
O29 C65 C70 106.9(4) . . ?
C73 C65 C70 111.9(4) . . ?
C66 C65 C70 110.4(4) . . ?
C67 C66 C65 111.5(4) . . ?
C66 C67 C68 112.3(4) . . ?
O26 C68 C67 110.6(4) . . ?
O26 C68 C69 111.2(4) . . ?
C67 C68 C69 110.6(4) . . ?
O27 C69 C68 111.8(4) . . ?
O27 C69 C70 107.2(3) . . ?
C68 C69 C70 113.5(4) . . ?
O28 C70 C69 108.5(3) . . ?
O28 C70 C65 104.5(3) . . ?
C69 C70 C65 107.8(3) . . ?
O28 C70 C71 107.3(3) . . ?
C69 C70 C71 112.7(4) . . ?
C65 C70 C71 115.6(4) . . ?
O30 C71 C74 109.6(4) . . ?
O30 C71 C72 102.4(3) . . ?
C74 C71 C72 112.2(4) . . ?
O30 C71 C70 107.3(4) . . ?
C74 C71 C70 112.5(4) . . ?
C72 C71 C70 112.4(4) . . ?
C76 C72 C71 112.3(4) . . ?
C76 C72 S6 109.0(4) . . ?
C71 C72 S6 112.8(3) . . ?
C65 C73 S6 112.8(3) . . ?
C77B C76 C72 113.6(5) . . ?
C72 C76 C77A 105.1(7) . . ?
C78 C77A C76 119.6(13) . . ?
C78 C77A C79 57.8(8) . . ?
C76 C77A C79 116.8(12) . . ?
C78 C77B C76 125.2(9) . . ?
C77A C78 C80 140.8(11) . . ?
C77B C78 C80 131.5(9) . . ?
C77A C78 C79 80.8(11) . . ?
C77B C78 C79 120.5(7) . . ?
C80 C78 C79 107.9(7) . . ?
C78 C79 C77A 41.4(7) . . ?
O23 C81 C89 110.6(4) . . ?
O23 C81 C82 109.5(4) . . ?
C89 C81 C82 107.8(4) . . ?
O23 C81 C86 106.5(4) . . ?
C89 C81 C86 112.5(4) . . ?
C82 C81 C86 109.9(4) . . ?
C83 C82 C81 112.2(5) . . ?
C82 C83 C84 112.0(4) . . ?
O22 C84 C83 110.3(5) . . ?
O22 C84 C85 111.5(4) . . ?
C83 C84 C85 111.7(4) . . ?
O21 C85 C86 107.1(4) . . ?
O21 C85 C84 112.1(4) . . ?
C86 C85 C84 112.1(4) . . ?
O24 C86 C85 108.9(3) . . ?
O24 C86 C81 104.7(3) . . ?
C85 C86 C81 107.5(3) . . ?
O24 C86 C87 107.1(3) . . ?
C85 C86 C87 113.5(4) . . ?
C81 C86 C87 114.8(3) . . ?
O25 C87 C90 108.8(4) . . ?
O25 C87 C88 103.0(3) . . ?
C90 C87 C88 112.7(4) . . ?
O25 C87 C86 107.4(3) . . ?
C90 C87 C86 112.7(4) . . ?
C88 C87 C86 111.7(3) . . ?
C92 C88 C87 113.2(4) . . ?
C92 C88 S5 108.6(4) . . ?
C87 C88 S5 112.3(3) . . ?
C81 C89 S5 113.2(3) . . ?
C93 C92 C88 112.7(4) . . ?
C94 C93 C92 127.6(6) . . ?
C93 C94 C95 125.1(5) . . ?
C93 C94 C96 120.3(6) . . ?
C95 C94 C96 114.6(5) . . ?
C55 S4 C56 96.5(2) . . ?
C5 C4 C3 111.7(5) . . ?
C89 S5 C88 96.5(2) . . ?
C4 C5 C6 112.7(6) . . ?
C73 S6 C72 97.2(2) . . ?
O1 C6 C7 110.7(4) . . ?
O1 C6 C5 107.9(4) . . ?
C7 C6 C5 110.4(5) . . ?
O1 C6 C1 107.1(4) . . ?
C7 C6 C1 112.6(4) . . ?
C5 C6 C1 108.0(4) . . ?
C27 O7 C18 114.5(4) . . ?
C6 C7 S1 112.6(4) . . ?
 
loop_
 _geom_torsion_atom_site_label_1
 _geom_torsion_atom_site_label_2
 _geom_torsion_atom_site_label_3
 _geom_torsion_atom_site_label_4
 _geom_torsion
 _geom_torsion_site_symmetry_1
 _geom_torsion_site_symmetry_2
 _geom_torsion_site_symmetry_3
 _geom_torsion_site_symmetry_4
 _geom_torsion_publ_flag
C12 C8 C9 O4 -61.4(5) . . . . ?
S1 C8 C9 O4 175.0(3) . . . . ?
C12 C8 C9 C10 55.3(6) . . . . ?
S1 C8 C9 C10 -68.3(5) . . . . ?
C12 C8 C9 C1 -175.7(4) . . . . ?
S1 C8 C9 C1 60.7(5) . . . . ?
C12 C8 S1 C7 172.5(4) . . . . ?
C9 C8 S1 C7 -59.9(4) . . . . ?
O4 C9 C1 O2 -48.8(5) . . . . ?
C10 C9 C1 O2 -170.2(4) . . . . ?
C8 C9 C1 O2 61.9(5) . . . . ?
O4 C9 C1 C6 -165.4(4) . . . . ?
C10 C9 C1 C6 73.3(6) . . . . ?
C8 C9 C1 C6 -54.6(5) . . . . ?
O4 C9 C1 C2 70.4(4) . . . . ?
C10 C9 C1 C2 -50.9(5) . . . . ?
C8 C9 C1 C2 -178.8(4) . . . . ?
C9 C8 C12 C13 153.7(5) . . . . ?
S1 C8 C12 C13 -80.1(6) . . . . ?
C8 C12 C13 C14 -159.7(7) . . . . ?
C12 C13 C14 C16 -3.1(13) . . . . ?
C12 C13 C14 C15 175.9(7) . . . . ?
O8 C17 C18 O7 67.1(5) . . . . ?
C22 C17 C18 O7 -179.4(4) . . . . ?
C25 C17 C18 O7 -52.6(5) . . . . ?
O8 C17 C18 C19 -55.6(5) . . . . ?
C22 C17 C18 C19 57.8(5) . . . . ?
C25 C17 C18 C19 -175.4(3) . . . . ?
O7 C18 C19 O6 -51.5(5) . . . . ?
C17 C18 C19 O6 68.5(5) . . . . ?
O7 C18 C19 C20 -176.4(4) . . . . ?
C17 C18 C19 C20 -56.4(5) . . . . ?
O6 C19 C20 C21 -71.6(5) . . . . ?
C18 C19 C20 C21 53.9(6) . . . . ?
O2 C1 C2 O3 66.5(5) . . . . ?
C6 C1 C2 O3 -179.7(4) . . . . ?
C9 C1 C2 O3 -51.9(5) . . . . ?
O2 C1 C2 C3 -56.4(5) . . . . ?
C6 C1 C2 C3 57.4(5) . . . . ?
C9 C1 C2 C3 -174.9(4) . . . . ?
C19 C20 C21 C22 -56.0(6) . . . . ?
C20 C21 C22 O9 -58.9(5) . . . . ?
C20 C21 C22 C23 179.5(4) . . . . ?
C20 C21 C22 C17 58.5(5) . . . . ?
O8 C17 C22 O9 176.5(3) . . . . ?
C18 C17 C22 O9 60.8(4) . . . . ?
C25 C17 C22 O9 -64.4(4) . . . . ?
O8 C17 C22 C21 58.1(4) . . . . ?
C18 C17 C22 C21 -57.6(5) . . . . ?
C25 C17 C22 C21 177.2(4) . . . . ?
O8 C17 C22 C23 -61.9(5) . . . . ?
C18 C17 C22 C23 -177.6(4) . . . . ?
C25 C17 C22 C23 57.2(5) . . . . ?
O9 C22 C23 S2 55.0(4) . . . . ?
C21 C22 C23 S2 175.0(3) . . . . ?
C17 C22 C23 S2 -64.1(4) . . . . ?
C24 S2 C23 C22 60.7(3) . . . . ?
C23 S2 C24 C28 177.8(3) . . . . ?
C23 S2 C24 C25 -57.6(4) . . . . ?
C28 C24 C25 O10 -64.1(4) . . . . ?
S2 C24 C25 O10 173.2(3) . . . . ?
C28 C24 C25 C26 52.3(5) . . . . ?
S2 C24 C25 C26 -70.4(4) . . . . ?
C28 C24 C25 C17 -178.7(4) . . . . ?
S2 C24 C25 C17 58.6(4) . . . . ?
O8 C17 C25 O10 -48.8(4) . . . . ?
C18 C17 C25 O10 71.0(4) . . . . ?
C22 C17 C25 O10 -166.1(3) . . . . ?
O8 C17 C25 C26 -169.2(3) . . . . ?
C18 C17 C25 C26 -49.3(5) . . . . ?
C22 C17 C25 C26 73.6(5) . . . . ?
O8 C17 C25 C24 62.2(4) . . . . ?
C18 C17 C25 C24 -177.9(3) . . . . ?
C22 C17 C25 C24 -55.0(5) . . . . ?
C25 C24 C28 C29 156.1(4) . . . . ?
S2 C24 C28 C29 -78.8(5) . . . . ?
C24 C28 C29 C30 143.0(6) . . . . ?
C28 C29 C30 C31 -1.7(11) . . . . ?
C28 C29 C30 C32 175.6(6) . . . . ?
C3 C2 O3 C11 -67.1(7) . . . . ?
C1 C2 O3 C11 168.9(5) . . . . ?
O3 C2 C3 O5 -52.7(7) . . . . ?
C1 C2 C3 O5 68.5(6) . . . . ?
O3 C2 C3 C4 -175.4(5) . . . . ?
C1 C2 C3 C4 -54.2(7) . . . . ?
O14 C33 C34 C35 -57.4(5) . . . . ?
C41 C33 C34 C35 -179.0(4) . . . . ?
C38 C33 C34 C35 58.5(5) . . . . ?
C33 C34 C35 C36 -59.7(5) . . . . ?
C34 C35 C36 O11 -66.9(6) . . . . ?
C34 C35 C36 C37 56.0(6) . . . . ?
C43 O12 C37 C36 -60.6(6) . . . . ?
C43 O12 C37 C38 174.8(4) . . . . ?
O11 C36 C37 O12 -52.1(6) . . . . ?
C35 C36 C37 O12 -175.4(4) . . . . ?
O11 C36 C37 C38 68.2(5) . . . . ?
C35 C36 C37 C38 -55.1(5) . . . . ?
O12 C37 C38 O13 64.4(4) . . . . ?
C36 C37 C38 O13 -58.0(4) . . . . ?
O12 C37 C38 C33 177.7(3) . . . . ?
C36 C37 C38 C33 55.2(5) . . . . ?
O12 C37 C38 C39 -54.8(4) . . . . ?
C36 C37 C38 C39 -177.3(3) . . . . ?
O14 C33 C38 O13 177.5(4) . . . . ?
C41 C33 C38 O13 -60.5(5) . . . . ?
C34 C33 C38 O13 60.7(5) . . . . ?
O14 C33 C38 C37 61.6(5) . . . . ?
C41 C33 C38 C37 -176.4(4) . . . . ?
C34 C33 C38 C37 -55.1(5) . . . . ?
O14 C33 C38 C39 -64.9(5) . . . . ?
C41 C33 C38 C39 57.1(5) . . . . ?
C34 C33 C38 C39 178.4(4) . . . . ?
O13 C38 C39 O15 -49.3(5) . . . . ?
C37 C38 C39 O15 70.4(4) . . . . ?
C33 C38 C39 O15 -164.9(4) . . . . ?
O13 C38 C39 C42 -167.7(4) . . . . ?
C37 C38 C39 C42 -48.1(5) . . . . ?
C33 C38 C39 C42 76.7(5) . . . . ?
O13 C38 C39 C40 62.3(4) . . . . ?
C37 C38 C39 C40 -178.0(3) . . . . ?
C33 C38 C39 C40 -53.3(5) . . . . ?
O15 C39 C40 C44 -63.2(4) . . . . ?
C42 C39 C40 C44 52.7(5) . . . . ?
C38 C39 C40 C44 -177.8(4) . . . . ?
O15 C39 C40 S3 171.6(3) . . . . ?
C42 C39 C40 S3 -72.6(4) . . . . ?
C38 C39 C40 S3 57.0(4) . . . . ?
C41 S3 C40 C39 -56.3(4) . . . . ?
C41 S3 C40 C44 175.2(4) . . . . ?
O14 C33 C41 S3 54.4(4) . . . . ?
C34 C33 C41 S3 174.0(3) . . . . ?
C38 C33 C41 S3 -64.6(5) . . . . ?
C40 S3 C41 C33 59.9(4) . . . . ?
C39 C40 C44 C45 -86.2(5) . . . . ?
S3 C40 C44 C45 41.8(5) . . . . ?
C40 C44 C45 C46 -174.2(5) . . . . ?
C44 C45 C46 C48 -3.0(10) . . . . ?
C44 C45 C46 C47 176.5(5) . . . . ?
O17 C49 C50 C51 -57.4(5) . . . . ?
C55 C49 C50 C51 -178.4(4) . . . . ?
C54 C49 C50 C51 58.4(5) . . . . ?
C49 C50 C51 C52 -53.3(5) . . . . ?
C50 C51 C52 O20 -75.5(5) . . . . ?
C50 C51 C52 C53 50.5(5) . . . . ?
C59 O19 C53 C52 -71.1(5) . . . . ?
C59 O19 C53 C54 163.9(4) . . . . ?
O20 C52 C53 O19 -51.6(5) . . . . ?
C51 C52 C53 O19 -177.2(4) . . . . ?
O20 C52 C53 C54 70.8(5) . . . . ?
C51 C52 C53 C54 -54.8(5) . . . . ?
O19 C53 C54 O18 70.6(4) . . . . ?
C52 C53 C54 O18 -53.7(4) . . . . ?
O19 C53 C54 C49 -176.6(3) . . . . ?
C52 C53 C54 C49 59.1(4) . . . . ?
O19 C53 C54 C57 -48.9(4) . . . . ?
C52 C53 C54 C57 -173.2(3) . . . . ?
O17 C49 C54 O18 174.1(3) . . . . ?
C55 C49 C54 O18 -64.6(4) . . . . ?
C50 C49 C54 O18 56.2(4) . . . . ?
O17 C49 C54 C53 58.3(4) . . . . ?
C55 C49 C54 C53 179.5(3) . . . . ?
C50 C49 C54 C53 -59.7(4) . . . . ?
O17 C49 C54 C57 -68.1(4) . . . . ?
C55 C49 C54 C57 53.1(5) . . . . ?
C50 C49 C54 C57 173.9(3) . . . . ?
O17 C49 C55 S4 56.6(4) . . . . ?
C50 C49 C55 S4 176.7(3) . . . . ?
C54 C49 C55 S4 -61.9(4) . . . . ?
C60 C56 C57 O16 -63.8(4) . . . . ?
S4 C56 C57 O16 173.1(3) . . . . ?
C60 C56 C57 C58 53.0(5) . . . . ?
S4 C56 C57 C58 -70.0(4) . . . . ?
C60 C56 C57 C54 -178.3(3) . . . . ?
S4 C56 C57 C54 58.7(4) . . . . ?
O18 C54 C57 O16 -47.6(4) . . . . ?
C53 C54 C57 O16 72.7(4) . . . . ?
C49 C54 C57 O16 -163.6(3) . . . . ?
O18 C54 C57 C58 -167.5(4) . . . . ?
C53 C54 C57 C58 -47.1(5) . . . . ?
C49 C54 C57 C58 76.5(5) . . . . ?
O18 C54 C57 C56 64.3(4) . . . . ?
C53 C54 C57 C56 -175.4(3) . . . . ?
C49 C54 C57 C56 -51.7(5) . . . . ?
C57 C56 C60 C61 158.7(4) . . . . ?
S4 C56 C60 C61 -75.5(4) . . . . ?
C56 C60 C61 C62 -175.8(5) . . . . ?
C60 C61 C62 C64 -1.6(9) . . . . ?
C60 C61 C62 C63 175.0(5) . . . . ?
O29 C65 C66 C67 -58.4(5) . . . . ?
C73 C65 C66 C67 -178.2(4) . . . . ?
C70 C65 C66 C67 58.6(5) . . . . ?
C65 C66 C67 C68 -55.9(5) . . . . ?
C66 C67 C68 O26 -71.0(5) . . . . ?
C66 C67 C68 C69 52.7(5) . . . . ?
C75 O27 C69 C68 -64.3(5) . . . . ?
C75 O27 C69 C70 170.8(4) . . . . ?
O26 C68 C69 O27 -52.4(5) . . . . ?
C67 C68 C69 O27 -175.8(4) . . . . ?
O26 C68 C69 C70 68.9(5) . . . . ?
C67 C68 C69 C70 -54.4(5) . . . . ?
O27 C69 C70 O28 67.9(4) . . . . ?
C68 C69 C70 O28 -56.0(5) . . . . ?
O27 C69 C70 C65 -179.5(3) . . . . ?
C68 C69 C70 C65 56.6(4) . . . . ?
O27 C69 C70 C71 -50.8(4) . . . . ?
C68 C69 C70 C71 -174.7(4) . . . . ?
O29 C65 C70 O28 175.9(3) . . . . ?
C73 C65 C70 O28 -63.6(4) . . . . ?
C66 C65 C70 O28 57.8(4) . . . . ?
O29 C65 C70 C69 60.7(4) . . . . ?
C73 C65 C70 C69 -178.9(4) . . . . ?
C66 C65 C70 C69 -57.5(4) . . . . ?
O29 C65 C70 C71 -66.4(4) . . . . ?
C73 C65 C70 C71 54.0(5) . . . . ?
C66 C65 C70 C71 175.4(4) . . . . ?
O28 C70 C71 O30 -47.9(4) . . . . ?
C69 C70 C71 O30 71.5(4) . . . . ?
C65 C70 C71 O30 -163.9(3) . . . . ?
O28 C70 C71 C74 -168.4(4) . . . . ?
C69 C70 C71 C74 -49.0(5) . . . . ?
C65 C70 C71 C74 75.6(5) . . . . ?
O28 C70 C71 C72 63.9(5) . . . . ?
C69 C70 C71 C72 -176.7(4) . . . . ?
C65 C70 C71 C72 -52.1(5) . . . . ?
O30 C71 C72 C76 -64.1(6) . . . . ?
C74 C71 C72 C76 53.2(6) . . . . ?
C70 C71 C72 C76 -178.9(5) . . . . ?
O30 C71 C72 S6 172.2(3) . . . . ?
C74 C71 C72 S6 -70.4(5) . . . . ?
C70 C71 C72 S6 57.5(5) . . . . ?
O29 C65 C73 S6 56.5(4) . . . . ?
C66 C65 C73 S6 175.6(3) . . . . ?
C70 C65 C73 S6 -62.1(4) . . . . ?
C71 C72 C76 C77B -175.9(6) . . . . ?
S6 C72 C76 C77B -50.2(8) . . . . ?
C71 C72 C76 C77A 140.5(9) . . . . ?
S6 C72 C76 C77A -93.8(9) . . . . ?
C72 C76 C77A C78 144.0(14) . . . . ?
C72 C76 C77A C79 -149.6(9) . . . . ?
C72 C76 C77B C78 -123.7(8) . . . . ?
C76 C77A C78 C80 -148.0(13) . . . . ?
C79 C77A C78 C80 107.2(17) . . . . ?
C76 C77A C78 C79 104.8(15) . . . . ?
C76 C77B C78 C80 169.8(8) . . . . ?
C76 C77B C78 C79 -6.5(12) . . . . ?
C80 C78 C79 C77A -140.6(11) . . . . ?
C76 C77A C79 C78 -109.6(14) . . . . ?
O23 C81 C82 C83 -56.6(5) . . . . ?
C89 C81 C82 C83 -177.0(4) . . . . ?
C86 C81 C82 C83 60.1(5) . . . . ?
C81 C82 C83 C84 -55.2(6) . . . . ?
C82 C83 C84 O22 -73.4(6) . . . . ?
C82 C83 C84 C85 51.2(6) . . . . ?
C91 O21 C85 C86 172.8(4) . . . . ?
C91 O21 C85 C84 -63.8(5) . . . . ?
O22 C84 C85 O21 -50.4(5) . . . . ?
C83 C84 C85 O21 -174.3(4) . . . . ?
O22 C84 C85 C86 70.2(5) . . . . ?
C83 C84 C85 C86 -53.7(5) . . . . ?
O21 C85 C86 O24 67.8(4) . . . . ?
C84 C85 C86 O24 -55.6(5) . . . . ?
O21 C85 C86 C81 -179.3(3) . . . . ?
C84 C85 C86 C81 57.2(4) . . . . ?
O21 C85 C86 C87 -51.4(4) . . . . ?
C84 C85 C86 C87 -174.8(3) . . . . ?
O23 C81 C86 O24 174.4(3) . . . . ?
C89 C81 C86 O24 -64.2(5) . . . . ?
C82 C81 C86 O24 56.0(4) . . . . ?
O23 C81 C86 C85 58.8(4) . . . . ?
C89 C81 C86 C85 -179.8(4) . . . . ?
C82 C81 C86 C85 -59.7(5) . . . . ?
O23 C81 C86 C87 -68.4(4) . . . . ?
C89 C81 C86 C87 53.0(5) . . . . ?
C82 C81 C86 C87 173.1(4) . . . . ?
O24 C86 C87 O25 -48.8(4) . . . . ?
C85 C86 C87 O25 71.4(4) . . . . ?
C81 C86 C87 O25 -164.5(3) . . . . ?
O24 C86 C87 C90 -168.6(3) . . . . ?
C85 C86 C87 C90 -48.4(5) . . . . ?
C81 C86 C87 C90 75.7(5) . . . . ?
O24 C86 C87 C88 63.4(4) . . . . ?
C85 C86 C87 C88 -176.4(3) . . . . ?
C81 C86 C87 C88 -52.3(5) . . . . ?
O25 C87 C88 C92 -61.6(5) . . . . ?
C90 C87 C88 C92 55.5(6) . . . . ?
C86 C87 C88 C92 -176.6(4) . . . . ?
O25 C87 C88 S5 175.1(3) . . . . ?
C90 C87 C88 S5 -67.9(4) . . . . ?
C86 C87 C88 S5 60.1(4) . . . . ?
O23 C81 C89 S5 57.6(5) . . . . ?
C82 C81 C89 S5 177.2(3) . . . . ?
C86 C81 C89 S5 -61.4(5) . . . . ?
C87 C88 C92 C93 -178.4(5) . . . . ?
S5 C88 C92 C93 -53.0(6) . . . . ?
C88 C92 C93 C94 -114.4(7) . . . . ?
C92 C93 C94 C95 1.9(10) . . . . ?
C92 C93 C94 C96 -178.4(5) . . . . ?
C49 C55 S4 C56 60.4(3) . . . . ?
C60 C56 S4 C55 174.8(3) . . . . ?
C57 C56 S4 C55 -58.7(3) . . . . ?
O5 C3 C4 C5 -70.8(6) . . . . ?
C2 C3 C4 C5 53.1(8) . . . . ?
C81 C89 S5 C88 60.9(4) . . . . ?
C92 C88 S5 C89 174.1(4) . . . . ?
C87 C88 S5 C89 -60.0(4) . . . . ?
C3 C4 C5 C6 -57.3(7) . . . . ?
C65 C73 S6 C72 60.2(4) . . . . ?
C76 C72 S6 C73 176.6(4) . . . . ?
C71 C72 S6 C73 -57.9(4) . . . . ?
C4 C5 C6 O1 -55.9(5) . . . . ?
C4 C5 C6 C7 -177.0(4) . . . . ?
C4 C5 C6 C1 59.5(6) . . . . ?
O2 C1 C6 O1 174.8(3) . . . . ?
C2 C1 C6 O1 58.2(5) . . . . ?
C9 C1 C6 O1 -66.9(5) . . . . ?
O2 C1 C6 C7 -63.2(5) . . . . ?
C2 C1 C6 C7 -179.9(4) . . . . ?
C9 C1 C6 C7 55.0(5) . . . . ?
O2 C1 C6 C5 58.9(5) . . . . ?
C2 C1 C6 C5 -57.7(6) . . . . ?
C9 C1 C6 C5 177.2(4) . . . . ?
C19 C18 O7 C27 -68.1(5) . . . . ?
C17 C18 O7 C27 168.5(4) . . . . ?
O1 C6 C7 S1 59.4(5) . . . . ?
C5 C6 C7 S1 178.7(3) . . . . ?
C1 C6 C7 S1 -60.5(5) . . . . ?
C8 S1 C7 C6 59.0(4) . . . . ?
 
_refine_diff_density_max    0.792
_refine_diff_density_min   -0.378
_refine_diff_density_rms    0.055

_shelx_res_file
;
TITL t_a.res in P2(1)2(1)2(1)
    t_a.res
    created by SHELXL-2018/3 at 09:26:41 on 09-Dec-2022
REM Old TITL t in P2(1)2(1)2(1)
REM SHELXT solution in P2(1)2(1)2(1): R1 0.130, Rweak 0.024, Alpha 0.005
REM <I/s>   0.610 for   39 systematic absences,  Orientation as input
REM Flack x =  0.064 ( 0.010 ) from  7111 Parsons' quotients
REM Formula found by SHELXT:  C97 O29 S6
CELL  1.54178  15.0176  24.2644  29.3542   90.000   90.000   90.000
ZERR  4.000   0.0003   0.0004   0.0005    0.000    0.000    0.000
LATT -1
SYMM 1/2-X, -Y, 1/2+Z
SYMM -X, 1/2+Y, 1/2-Z
SYMM 1/2+X, 1/2-Y, -Z
SFAC C H O S
UNIT 384 664 120 24
ACTA
SIZE 0.18 0.16 0.12
CONF
TEMP -100.150
L.S. 10
BOND
omit 1   0   4
omit     0   6   3
omit     4   0   1
omit     5   1   0
LIST 6
FMAP 2
PLAN 20
REM #####
WGHT    0.084100    4.541100
FVAR       0.22264   0.30523
O8    3    0.408936    0.510780    0.277883    11.00000    0.03224    0.03259 =
         0.02404    0.00123   -0.00444   -0.00070
AFIX 147
H8B   2    0.367332    0.521073    0.260753    11.00000   -1.50000
AFIX   0
C8    1    0.420247    0.201185    0.502424    11.00000    0.05662    0.02874 =
         0.04479   -0.00032   -0.00700   -0.00332
AFIX  13
H8    2    0.449428    0.203357    0.471856    11.00000   -1.20000
AFIX   0
O9    3    0.429522    0.508472    0.400908    11.00000    0.04797    0.04100 =
         0.02547    0.00897   -0.00727   -0.00769
AFIX 147
H9    2    0.449028    0.484814    0.419261    11.00000   -1.50000
AFIX   0
C9    1    0.368147    0.255921    0.509451    11.00000    0.03178    0.03993 =
         0.03174   -0.00265    0.00124   -0.00450
O10   3    0.256373    0.568545    0.291564    11.00000    0.03734    0.03199 =
         0.02627    0.00448   -0.00852   -0.00260
AFIX 147
H10   2    0.289666    0.595550    0.286042    11.00000   -1.50000
AFIX   0
C10   1    0.312945    0.255659    0.552803    11.00000    0.04479    0.07868 =
         0.03664    0.00391    0.00636   -0.00890
AFIX 137
H10A  2    0.352455    0.252430    0.579239    11.00000   -1.50000
H10B  2    0.271783    0.224326    0.552236    11.00000   -1.50000
H10C  2    0.278977    0.290050    0.554906    11.00000   -1.50000
AFIX   0
O11   3    0.852903    0.671360    0.129358    11.00000    0.04917    0.07223 =
         0.04002    0.01266    0.01851    0.02097
H1    2    0.803473    0.668444    0.113433    11.00000   -1.50000
C11   1    0.241370    0.404096    0.492040    11.00000    0.10405    0.08039 =
         0.06186   -0.01403   -0.01639    0.05413
AFIX 137
H11A  2    0.191318    0.399727    0.470925    11.00000   -1.50000
H11B  2    0.268939    0.440273    0.487416    11.00000   -1.50000
H11C  2    0.219748    0.401254    0.523452    11.00000   -1.50000
AFIX   0
S1    4    0.508001    0.191935    0.544178    11.00000    0.07046    0.03614 =
         0.05930    0.00119   -0.01925    0.01008
O1    3    0.484729    0.310777    0.582147    11.00000    0.05758    0.04017 =
         0.02491    0.00160   -0.00830   -0.00415
AFIX 147
H1A   2    0.528323    0.314801    0.599765    11.00000   -1.50000
AFIX   0
C1    1    0.432903    0.306748    0.504769    11.00000    0.04214    0.03261 =
         0.02065   -0.00181    0.00045   -0.00049
O12   3    0.777289    0.773795    0.152148    11.00000    0.03312    0.05167 =
         0.04024    0.01446   -0.00276   -0.00271
C12   1    0.363298    0.149275    0.502696    11.00000    0.07721    0.04132 =
         0.07540    0.00433   -0.01429   -0.01791
AFIX  23
H12A  2    0.304030    0.157322    0.489513    11.00000   -1.20000
H12B  2    0.354788    0.136336    0.534384    11.00000   -1.20000
AFIX   0
O13   3    0.676512    0.689792    0.110044    11.00000    0.04917    0.03161 =
         0.02358    0.00360    0.00751    0.00943
AFIX 147
H13A  2    0.667321    0.716800    0.092771    11.00000   -1.50000
AFIX   0
C13   1    0.410895    0.103549    0.473992    11.00000    0.06462    0.04431 =
         0.07398   -0.00307    0.00748   -0.00435
AFIX  43
H13   2    0.473063    0.107620    0.469045    11.00000   -1.20000
AFIX   0
O14   3    0.621159    0.665916    0.228124    11.00000    0.04779    0.04184 =
         0.02698    0.01045    0.01393    0.00792
AFIX 147
H14   2    0.605459    0.637668    0.242586    11.00000   -1.50000
AFIX   0
C14   1    0.372129    0.059937    0.456124    11.00000    0.06114    0.05039 =
         0.07067   -0.00182    0.00179   -0.00367
O15   3    0.616057    0.793413    0.123250    11.00000    0.03460    0.03170 =
         0.02602    0.00787   -0.00001    0.00180
AFIX 147
H15   2    0.668214    0.803997    0.128758    11.00000   -1.50000
AFIX   0
C15   1    0.422026    0.019800    0.426257    11.00000    0.07421    0.05159 =
         0.08975   -0.01471    0.00863   -0.00257
AFIX 137
H15A  2    0.397415    0.020873    0.395350    11.00000   -1.50000
H15B  2    0.415900   -0.017501    0.438670    11.00000   -1.50000
H15C  2    0.485155    0.029970    0.425362    11.00000   -1.50000
AFIX   0
O16   3   -0.078857    0.796198    0.376575    11.00000    0.02991    0.03030 =
         0.03133   -0.00866    0.00019    0.00103
AFIX 147
H16   2   -0.134443    0.792380    0.377011    11.00000   -1.50000
AFIX   0
C16   1    0.276228    0.046553    0.462864    11.00000    0.07745    0.07576 =
         0.15037   -0.04019    0.02941   -0.02359
AFIX 137
H16A  2    0.270411    0.008241    0.473002    11.00000   -1.50000
H16B  2    0.244210    0.051451    0.434056    11.00000   -1.50000
H16C  2    0.250968    0.071162    0.485968    11.00000   -1.50000
AFIX   0
O17   3   -0.044352    0.664163    0.276078    11.00000    0.04038    0.03258 =
         0.02417   -0.00639    0.00290    0.00043
AFIX 147
H17   2   -0.026804    0.636574    0.261306    11.00000   -1.50000
AFIX   0
C17   1    0.393633    0.531290    0.323456    11.00000    0.03618    0.02890 =
         0.02024    0.00214   -0.00335   -0.00577
O18   3   -0.067965    0.689107    0.396839    11.00000    0.03371    0.03046 =
         0.02257   -0.00162    0.00029    0.00233
AFIX 147
H18A  2   -0.071650    0.718149    0.412300    11.00000   -1.50000
AFIX   0
C18   1    0.444398    0.586658    0.329165    11.00000    0.04463    0.03234 =
         0.02778    0.00405   -0.00821   -0.01095
AFIX  13
H18   2    0.437438    0.599447    0.361353    11.00000   -1.20000
AFIX   0
O19   3   -0.225690    0.741252    0.356812    11.00000    0.02949    0.03608 =
         0.03719   -0.00570   -0.00422    0.00665
C19   1    0.543882    0.581432    0.318607    11.00000    0.03926    0.04634 =
         0.03578    0.00948   -0.00658   -0.01775
AFIX  13
H19   2    0.572534    0.617362    0.326582    11.00000   -1.20000
AFIX   0
O20   3   -0.227382    0.634698    0.397082    11.00000    0.03760    0.04476 =
         0.03711    0.00051    0.01266   -0.00220
AFIX 147
H20   2   -0.179496    0.643299    0.410050    11.00000   -1.50000
AFIX   0
C20   1    0.586617    0.537052    0.348313    11.00000    0.03473    0.05445 =
         0.04260    0.01207   -0.01072   -0.01389
AFIX  23
H20A  2    0.649462    0.531961    0.339037    11.00000   -1.20000
H20B  2    0.585979    0.549175    0.380514    11.00000   -1.20000
AFIX   0
S2    4    0.278131    0.432306    0.367546    11.00000    0.04244    0.04294 =
         0.04425    0.01818   -0.00836   -0.01575
O2    3    0.468385    0.306408    0.459358    11.00000    0.03717    0.04779 =
         0.02297   -0.00070   -0.00319   -0.01003
AFIX 147
H2A   2    0.429937    0.293991    0.441286    11.00000   -1.50000
AFIX   0
C2    1    0.381628    0.361787    0.512774    11.00000    0.07539    0.03213 =
         0.02886   -0.00460   -0.01283    0.01256
AFIX  13
H2    2    0.360698    0.362596    0.545108    11.00000   -1.20000
AFIX   0
O21   3    0.198593    0.619288    0.188989    11.00000    0.05160    0.02614 =
         0.04085   -0.00216   -0.00738    0.00611
C21   1    0.537617    0.482639    0.344114    11.00000    0.03764    0.04761 =
         0.03541    0.01411   -0.00789   -0.00148
AFIX  23
H21A  2    0.565045    0.455411    0.364947    11.00000   -1.20000
H21B  2    0.543945    0.468599    0.312614    11.00000   -1.20000
AFIX   0
O22   3    0.041217    0.580325    0.232015    11.00000    0.04374    0.05695 =
         0.03657   -0.01731    0.00320    0.01302
AFIX 147
H22   2    0.088631    0.566566    0.242071    11.00000   -1.50000
AFIX   0
C22   1    0.438123    0.488343    0.355595    11.00000    0.03600    0.03246 =
         0.02574    0.00670   -0.00655   -0.00739
O23   3    0.121380    0.496782    0.101213    11.00000    0.04787    0.04608 =
         0.02726   -0.01020   -0.00771    0.00914
C23   1    0.393475    0.431581    0.350120    11.00000    0.04624    0.02943 =
         0.03942    0.01038   -0.00789   -0.00440
AFIX  23
H23A  2    0.426240    0.404134    0.368605    11.00000   -1.20000
H23B  2    0.397189    0.420056    0.317823    11.00000   -1.20000
AFIX   0
O24   3    0.177687    0.508133    0.220246    11.00000    0.02977    0.03689 =
         0.02526   -0.00058   -0.00252   -0.00345
AFIX 147
H24B  2    0.214774    0.526470    0.235383    11.00000   -1.50000
AFIX   0
C24   1    0.240097    0.483320    0.326685    11.00000    0.03344    0.03854 =
         0.03076    0.00949   -0.00269   -0.00628
AFIX  13
H24   2    0.250776    0.468248    0.295453    11.00000   -1.20000
AFIX   0
O25   3    0.335108    0.550619    0.194457    11.00000    0.03465    0.03168 =
         0.03489    0.00489   -0.00633   -0.00171
AFIX 147
H25   2    0.321080    0.584101    0.193280    11.00000   -1.50000
AFIX   0
C25   1    0.290656    0.538452    0.330561    11.00000    0.03496    0.03494 =
         0.02401    0.00328   -0.00300   -0.00175
O26   3   -0.004479    0.430263    0.059150    11.00000    0.05690    0.04334 =
         0.03266   -0.01108   -0.01070    0.00301
AFIX 147
H26   2   -0.019548    0.399164    0.069081    11.00000   -1.50000
AFIX   0
C26   1    0.267110    0.570106    0.374259    11.00000    0.04145    0.04419 =
         0.03230   -0.00296    0.00041    0.00108
AFIX 137
H26A  2    0.286200    0.548741    0.400854    11.00000   -1.50000
H26B  2    0.202588    0.575927    0.375606    11.00000   -1.50000
H26C  2    0.297522    0.605840    0.374190    11.00000   -1.50000
AFIX   0
O27   3    0.122764    0.363977    0.012531    11.00000    0.03263    0.03973 =
         0.04038    0.00783   -0.00691   -0.00366
C27   1    0.428412    0.681823    0.306788    11.00000    0.06594    0.02759 =
         0.05467    0.00466   -0.00334   -0.00955
AFIX 137
H27A  2    0.391637    0.706195    0.287952    11.00000   -1.50000
H27B  2    0.491140    0.686196    0.298324    11.00000   -1.50000
H27C  2    0.420628    0.691416    0.338972    11.00000   -1.50000
AFIX   0
O28   3   -0.039815    0.320901    0.049335    11.00000    0.03391    0.04178 =
         0.02366    0.00618   -0.00120    0.00677
AFIX 147
H28   2    0.005162    0.308456    0.062884    11.00000   -1.50000
AFIX   0
C28   1    0.139433    0.490838    0.332615    11.00000    0.03598    0.04741 =
         0.03768   -0.00013    0.00143   -0.00483
AFIX  23
H28A  2    0.125640    0.492137    0.365577    11.00000   -1.20000
H28B  2    0.121964    0.526721    0.319281    11.00000   -1.20000
AFIX   0
O29   3   -0.099127    0.342624   -0.068642    11.00000    0.04309    0.03887 =
         0.02535   -0.00180   -0.00826   -0.00135
AFIX 147
H29A  2   -0.148168    0.342006   -0.082395    11.00000   -1.50000
AFIX   0
C29   1    0.085061    0.446690    0.311211    11.00000    0.04002    0.05906 =
         0.04227   -0.00443   -0.00301   -0.00873
AFIX  43
H29   2    0.106613    0.432733    0.283056    11.00000   -1.20000
AFIX   0
O30   3    0.094738    0.257677    0.019780    11.00000    0.03567    0.03945 =
         0.04410    0.01462    0.00340    0.00504
AFIX 147
H30   2    0.130962    0.284055    0.019671    11.00000   -1.50000
AFIX   0
C30   1    0.010607    0.424462    0.326427    11.00000    0.03670    0.04177 =
         0.06718   -0.00313   -0.00203   -0.00354
C31   1   -0.033512    0.439266    0.370530    11.00000    0.07055    0.07580 =
         0.09482   -0.01401    0.03247   -0.02328
AFIX 137
H31A  2   -0.040830    0.406022    0.389115    11.00000   -1.50000
H31B  2   -0.092029    0.455509    0.364360    11.00000   -1.50000
H31C  2    0.003462    0.465953    0.386967    11.00000   -1.50000
AFIX   0
S3    4    0.453183    0.674103    0.168515    11.00000    0.04052    0.04591 =
         0.05380    0.00758    0.00701   -0.00674
O3    3    0.305583    0.361923    0.483781    11.00000    0.07375    0.05609 =
         0.03929   -0.01069   -0.01060    0.03224
C3    1    0.439109    0.412231    0.504491    11.00000    0.12205    0.03392 =
         0.04174    0.00279   -0.02867   -0.00828
AFIX  13
H3    2    0.404692    0.445502    0.514191    11.00000   -1.20000
AFIX   0
C32   1   -0.040285    0.382709    0.299099    11.00000    0.03814    0.09496 =
         0.12536   -0.04120    0.00292   -0.02156
AFIX 137
H32A  2   -0.102329    0.394664    0.296033    11.00000   -1.50000
H32B  2   -0.038313    0.346971    0.314619    11.00000   -1.50000
H32C  2   -0.013432    0.379239    0.268807    11.00000   -1.50000
AFIX   0
C33   1    0.632667    0.652321    0.181173    11.00000    0.05312    0.03204 =
         0.02635    0.00599    0.01170    0.00831
C34   1    0.707505    0.609042    0.177620    11.00000    0.07693    0.03437 =
         0.04226    0.01048    0.01899    0.01802
AFIX  23
H34A  2    0.688923    0.574935    0.193503    11.00000   -1.20000
H34B  2    0.717811    0.599875    0.145183    11.00000   -1.20000
AFIX   0
C35   1    0.793570    0.630264    0.198572    11.00000    0.04983    0.05801 =
         0.04133    0.01533    0.00867    0.02713
AFIX  23
H35A  2    0.783733    0.637958    0.231309    11.00000   -1.20000
H35B  2    0.839948    0.601415    0.196161    11.00000   -1.20000
AFIX   0
C36   1    0.825892    0.681948    0.175387    11.00000    0.04114    0.05831 =
         0.03244    0.01102    0.00904    0.01953
AFIX  13
H36   2    0.878451    0.696300    0.192614    11.00000   -1.20000
AFIX   0
C37   1    0.751685    0.725681    0.177015    11.00000    0.03745    0.04104 =
         0.02831    0.00777    0.00495    0.00885
AFIX  13
H37   2    0.741714    0.736341    0.209525    11.00000   -1.20000
AFIX   0
C38   1    0.661955    0.706164    0.156710    11.00000    0.03462    0.03333 =
         0.02226    0.00399    0.00613    0.00689
C39   1    0.589381    0.752967    0.156938    11.00000    0.03545    0.02892 =
         0.02460    0.00670    0.00332    0.00484
C40   1    0.498676    0.733162    0.138224    11.00000    0.03652    0.03645 =
         0.03136    0.00300    0.00293    0.00355
AFIX  13
H40   2    0.509378    0.720881    0.106169    11.00000   -1.20000
AFIX   0
C41   1    0.547349    0.628958    0.160552    11.00000    0.05806    0.03045 =
         0.04749    0.00572    0.00914   -0.00103
AFIX  23
H41A  2    0.534304    0.592855    0.174776    11.00000   -1.20000
H41B  2    0.556515    0.622794    0.127545    11.00000   -1.20000
AFIX   0
C42   1    0.582519    0.782347    0.203136    11.00000    0.04343    0.03607 =
         0.02767   -0.00014    0.00355    0.00988
AFIX 137
H42A  2    0.562515    0.756108    0.226362    11.00000   -1.50000
H42B  2    0.539653    0.812678    0.200891    11.00000   -1.50000
H42C  2    0.641009    0.797006    0.211641    11.00000   -1.50000
AFIX   0
C43   1    0.854878    0.801281    0.168100    11.00000    0.04661    0.07234 =
         0.06961    0.01176   -0.01600   -0.00898
AFIX 137
H43A  2    0.861058    0.836683    0.152345    11.00000   -1.50000
H43B  2    0.907349    0.778435    0.161991    11.00000   -1.50000
H43C  2    0.849703    0.807669    0.200959    11.00000   -1.50000
AFIX   0
C44   1    0.426171    0.778308    0.136047    11.00000    0.03094    0.05429 =
         0.04324    0.00873   -0.00136    0.00773
AFIX  23
H44A  2    0.455038    0.813678    0.128015    11.00000   -1.20000
H44B  2    0.384333    0.768991    0.111148    11.00000   -1.20000
AFIX   0
C45   1    0.373427    0.786522    0.179047    11.00000    0.03513    0.05300 =
         0.04855    0.00488    0.00224    0.00962
AFIX  43
H45   2    0.391706    0.766208    0.205085    11.00000   -1.20000
AFIX   0
C46   1    0.303513    0.819633    0.183952    11.00000    0.03450    0.04599 =
         0.05447   -0.00251    0.00025   -0.00015
C47   1    0.253066    0.821771    0.228170    11.00000    0.04146    0.07101 =
         0.06444   -0.00472    0.00810    0.01397
AFIX 137
H47A  2    0.253673    0.859538    0.239997    11.00000   -1.50000
H47B  2    0.281248    0.797060    0.250295    11.00000   -1.50000
H47C  2    0.191401    0.810107    0.223035    11.00000   -1.50000
AFIX   0
C48   1    0.270621    0.856011    0.146148    11.00000    0.06477    0.08172 =
         0.07517    0.00844    0.00060    0.03209
AFIX 137
H48A  2    0.210311    0.844760    0.137427    11.00000   -1.50000
H48B  2    0.310357    0.852624    0.119814    11.00000   -1.50000
H48C  2    0.269728    0.894393    0.156531    11.00000   -1.50000
AFIX   0
C49   1   -0.027376    0.655785    0.323494    11.00000    0.03246    0.02759 =
         0.02453   -0.00233    0.00233    0.00290
C50   1   -0.064114    0.599132    0.338005    11.00000    0.03890    0.02785 =
         0.03353   -0.00065    0.00505    0.00283
AFIX  23
H50A  2   -0.031501    0.569804    0.321533    11.00000   -1.20000
H50B  2   -0.053711    0.593873    0.371024    11.00000   -1.20000
AFIX   0
C51   1   -0.163454    0.593702    0.328142    11.00000    0.03511    0.03132 =
         0.03726   -0.00167    0.00504   -0.00538
AFIX  23
H51A  2   -0.185270    0.558321    0.340692    11.00000   -1.20000
H51B  2   -0.172796    0.593014    0.294761    11.00000   -1.20000
AFIX   0
C52   1   -0.217478    0.640945    0.348684    11.00000    0.02985    0.03572 =
         0.03627   -0.00101   -0.00134   -0.00272
AFIX  13
H52   2   -0.278451    0.639150    0.335072    11.00000   -1.20000
AFIX   0
C53   1   -0.178067    0.696856    0.335939    11.00000    0.02997    0.03064 =
         0.02684   -0.00535   -0.00303    0.00215
AFIX  13
H53   2   -0.183092    0.701204    0.302161    11.00000   -1.20000
AFIX   0
C54   1   -0.078689    0.702182    0.348861    11.00000    0.02925    0.02929 =
         0.01903   -0.00148   -0.00077    0.00214
C55   1    0.072294    0.656996    0.333259    11.00000    0.03286    0.03015 =
         0.03728   -0.00151    0.00307    0.00382
AFIX  23
H55A  2    0.101020    0.625461    0.317702    11.00000   -1.20000
H55B  2    0.081924    0.652558    0.366421    11.00000   -1.20000
AFIX   0
C56   1    0.059441    0.766092    0.350283    11.00000    0.03127    0.03158 =
         0.03040   -0.00584    0.00317   -0.00097
AFIX  13
H56   2    0.069691    0.755037    0.382680    11.00000   -1.20000
AFIX   0
C57   1   -0.041384    0.761763    0.341098    11.00000    0.03166    0.02750 =
         0.02296   -0.00191   -0.00285    0.00167
C58   1   -0.066809    0.785585    0.294500    11.00000    0.04092    0.03328 =
         0.03031    0.00441   -0.00523   -0.00114
AFIX 137
H58A  2   -0.039582    0.763339    0.270367    11.00000   -1.50000
H58B  2   -0.045378    0.823636    0.292257    11.00000   -1.50000
H58C  2   -0.131719    0.785005    0.291093    11.00000   -1.50000
AFIX   0
C59   1   -0.312223    0.750631    0.338552    11.00000    0.03245    0.04826 =
         0.04871   -0.00008   -0.00557    0.00929
AFIX 137
H59A  2   -0.333963    0.786714    0.348615    11.00000   -1.50000
H59B  2   -0.352855    0.721809    0.349271    11.00000   -1.50000
H59C  2   -0.309402    0.749823    0.305205    11.00000   -1.50000
AFIX   0
C60   1    0.097177    0.824539    0.344307    11.00000    0.03997    0.03677 =
         0.03631   -0.00167    0.00090   -0.00652
AFIX  23
H60A  2    0.106775    0.831771    0.311480    11.00000   -1.20000
H60B  2    0.053171    0.851639    0.355656    11.00000   -1.20000
AFIX   0
C61   1    0.183999    0.832345    0.369482    11.00000    0.03983    0.03696 =
         0.04078   -0.00451    0.00114   -0.00328
AFIX  43
H61   2    0.208158    0.800852    0.384211    11.00000   -1.20000
AFIX   0
C62   1    0.229813    0.878932    0.373025    11.00000    0.02965    0.04147 =
         0.05556   -0.00827    0.00884   -0.00409
C63   1    0.311439    0.882721    0.402087    11.00000    0.04328    0.05585 =
         0.06361   -0.01890    0.00407   -0.01151
AFIX 137
H63A  2    0.362949    0.891599    0.382948    11.00000   -1.50000
H63B  2    0.321488    0.847355    0.417369    11.00000   -1.50000
H63C  2    0.303341    0.911690    0.424977    11.00000   -1.50000
AFIX   0
C64   1    0.201582    0.931064    0.350880    11.00000    0.04360    0.04376 =
         0.15569    0.01569   -0.01769   -0.01570
AFIX 137
H64A  2    0.254133    0.950764    0.339626    11.00000   -1.50000
H64B  2    0.170149    0.954133    0.373069    11.00000   -1.50000
H64C  2    0.161822    0.922722    0.325320    11.00000   -1.50000
AFIX   0
C65   1   -0.113914    0.335086   -0.020605    11.00000    0.03673    0.02920 =
         0.02691    0.00026   -0.00374    0.00118
C66   1   -0.155116    0.388007   -0.001085    11.00000    0.03864    0.03936 =
         0.03320   -0.00628   -0.00694    0.01041
AFIX  23
H66A  2   -0.213669    0.394533   -0.015611    11.00000   -1.20000
H66B  2   -0.164978    0.383332    0.032037    11.00000   -1.20000
AFIX   0
C67   1   -0.095658    0.437433   -0.009048    11.00000    0.04683    0.03006 =
         0.03870   -0.00222   -0.01088    0.00914
AFIX  23
H67A  2   -0.122833    0.470249    0.005386    11.00000   -1.20000
H67B  2   -0.091405    0.444548   -0.042186    11.00000   -1.20000
AFIX   0
C68   1   -0.002880    0.429067    0.010082    11.00000    0.04767    0.03210 =
         0.03118   -0.00424   -0.00964    0.00044
C69   1    0.037442    0.374999   -0.007639    11.00000    0.03590    0.03008 =
         0.02669    0.00361   -0.00622    0.00004
AFIX  13
H69   2    0.045889    0.378589   -0.041300    11.00000   -1.20000
AFIX   0
C70   1   -0.021916    0.324070    0.001291    11.00000    0.03278    0.02784 =
         0.02301    0.00298    0.00250   -0.00101
C71   1    0.024420    0.268296   -0.013001    11.00000    0.03177    0.02789 =
         0.03518    0.00166    0.00421    0.00131
C72   1   -0.037517    0.217805   -0.006501    11.00000    0.03606    0.02856 =
         0.05328    0.00618    0.00833    0.00012
AFIX  13
H72   2   -0.052954    0.215617    0.026588    11.00000   -1.20000
AFIX   0
C73   1   -0.178723    0.287077   -0.012747    11.00000    0.03615    0.03638 =
         0.04588    0.00411   -0.00468    0.00139
AFIX  23
H73A  2   -0.237537    0.296865   -0.025656    11.00000   -1.20000
H73B  2   -0.186393    0.281457    0.020426    11.00000   -1.20000
AFIX   0
C74   1    0.063953    0.270767   -0.060970    11.00000    0.04677    0.03428 =
         0.04127   -0.00224    0.01347   -0.00257
AFIX 137
H74A  2    0.015878    0.274947   -0.083280    11.00000   -1.50000
H74B  2    0.096754    0.236670   -0.067182    11.00000   -1.50000
H74C  2    0.104561    0.302269   -0.063188    11.00000   -1.50000
AFIX   0
C75   1    0.191054    0.402714    0.001871    11.00000    0.03980    0.05233 =
         0.04688    0.00442    0.00045   -0.01106
AFIX 137
H75A  2    0.249380    0.386303    0.008208    11.00000   -1.50000
H75B  2    0.183327    0.435867    0.020525    11.00000   -1.50000
H75C  2    0.187390    0.412596   -0.030445    11.00000   -1.50000
AFIX   0
C76   1    0.008578    0.163166   -0.019627    11.00000    0.05160    0.02493 =
         0.11760   -0.00082    0.02841   -0.00420
AFIX  23
H76A  2    0.074147    0.167314   -0.018984    11.00000   -1.20000
H76B  2   -0.009681    0.151311   -0.050517    11.00000   -1.20000
AFIX   0
part 1
C77A  1   -0.024326    0.118480    0.018764    21.00000    0.06878    0.02626 =
         0.03862    0.00257    0.00947    0.00498
part 2
C77B  1   -0.053267    0.112586   -0.016798   -21.00000    0.05228    0.02700 =
         0.06748    0.00004    0.02169    0.00301
part 0
C78   1   -0.038199    0.068905    0.007215    11.00000    0.09092    0.03672 =
         0.04641   -0.00853    0.01815   -0.00962
C79   1    0.055931    0.061076    0.033421    11.00000    0.19432    0.08437 =
         0.09252    0.01489   -0.06649   -0.03116
AFIX 137
H79A  2    0.045082    0.056439    0.066118    11.00000   -1.50000
H79B  2    0.093226    0.093669    0.028455    11.00000   -1.50000
H79C  2    0.086409    0.028384    0.021537    11.00000   -1.50000
AFIX   0
C80   1   -0.094262    0.022415    0.018472    11.00000    0.10294    0.03518 =
         0.22967    0.02740    0.06762    0.00172
AFIX 137
H80A  2   -0.111519    0.024524    0.050622    11.00000   -1.50000
H80B  2   -0.061499   -0.011894    0.013057    11.00000   -1.50000
H80C  2   -0.147767    0.023105   -0.000632    11.00000   -1.50000
AFIX   0
C81   1    0.123791    0.480292    0.147885    11.00000    0.03109    0.03617 =
         0.02842   -0.00676   -0.00381    0.00299
C82   1    0.029935    0.481961    0.167573    11.00000    0.03017    0.05129 =
         0.04188   -0.01530   -0.00073   -0.00067
AFIX  23
H82A  2   -0.007397    0.454274    0.151796    11.00000   -1.20000
H82B  2    0.032259    0.471968    0.200250    11.00000   -1.20000
AFIX   0
C83   1   -0.012122    0.537617    0.162695    11.00000    0.03561    0.05817 =
         0.05281   -0.01943   -0.00829    0.01193
AFIX  23
H83A  2   -0.071126    0.537365    0.177735    11.00000   -1.20000
H83B  2   -0.021431    0.545622    0.129969    11.00000   -1.20000
AFIX   0
C84   1    0.045170    0.582977    0.183654    11.00000    0.04343    0.04529 =
         0.03658   -0.01098   -0.00642    0.01667
AFIX  13
H84   2    0.019586    0.619220    0.174079    11.00000   -1.20000
AFIX   0
C85   1    0.142376    0.580465    0.166256    11.00000    0.04380    0.03296 =
         0.02609   -0.00322   -0.00454    0.00919
AFIX  13
H85   2    0.142524    0.589128    0.132951    11.00000   -1.20000
AFIX   0
C86   1    0.184234    0.522856    0.173110    11.00000    0.03400    0.02964 =
         0.02179   -0.00087   -0.00055    0.00565
C87   1    0.285852    0.520246    0.159865    11.00000    0.03325    0.02888 =
         0.02706    0.00254   -0.00288    0.00197
C88   1    0.323648    0.460800    0.164369    11.00000    0.02858    0.02946 =
         0.04311    0.00599    0.00450    0.00216
AFIX  13
H88   2    0.314233    0.448710    0.196579    11.00000   -1.20000
AFIX   0
C89   1    0.158005    0.421692    0.152257    11.00000    0.03609    0.03545 =
         0.04258   -0.00708    0.00427   -0.00160
AFIX  23
H89A  2    0.115688    0.396426    0.137008    11.00000   -1.20000
H89B  2    0.160104    0.411591    0.184916    11.00000   -1.20000
AFIX   0
C90   1    0.304926    0.545969    0.113209    11.00000    0.04439    0.03681 =
         0.03159    0.00496    0.00657    0.00388
AFIX 137
H90A  2    0.273844    0.524983    0.089528    11.00000   -1.50000
H90B  2    0.369149    0.545158    0.107327    11.00000   -1.50000
H90C  2    0.283987    0.584220    0.112929    11.00000   -1.50000
AFIX   0
C91   1    0.175713    0.675625    0.181499    11.00000    0.07515    0.03211 =
         0.06976    0.00049   -0.00008    0.01072
AFIX 137
H91A  2    0.225702    0.699199    0.190488    11.00000   -1.50000
H91B  2    0.123196    0.685049    0.199721    11.00000   -1.50000
H91C  2    0.162523    0.681327    0.149145    11.00000   -1.50000
AFIX   0
C92   1    0.424158    0.457275    0.154472    11.00000    0.03209    0.03986 =
         0.08630    0.01767    0.01068    0.00651
AFIX  23
H92A  2    0.435783    0.471778    0.123515    11.00000   -1.20000
H92B  2    0.456529    0.480867    0.176446    11.00000   -1.20000
AFIX   0
C93   1    0.459531    0.399338    0.157641    11.00000    0.03589    0.04041 =
         0.07667    0.00606    0.01326    0.00665
AFIX  43
H93   2    0.437874    0.373980    0.135612    11.00000   -1.20000
AFIX   0
C94   1    0.517113    0.379689    0.187457    11.00000    0.04457    0.04209 =
         0.05266    0.00790    0.01667    0.01126
C95   1    0.557406    0.411766    0.225703    11.00000    0.10733    0.05973 =
         0.07348   -0.01380   -0.01120    0.02832
AFIX 137
H95A  2    0.559605    0.388736    0.253105    11.00000   -1.50000
H95B  2    0.521143    0.444543    0.231729    11.00000   -1.50000
H95C  2    0.617900    0.423060    0.217360    11.00000   -1.50000
AFIX   0
C96   1    0.546869    0.320852    0.184738    11.00000    0.05297    0.04387 =
         0.06395    0.01514    0.01625    0.01607
AFIX 137
H96A  2    0.611020    0.319560    0.178713    11.00000   -1.50000
H96B  2    0.514902    0.302202    0.160051    11.00000   -1.50000
H96C  2    0.534150    0.302304    0.213672    11.00000   -1.50000
AFIX   0
S4    4    0.124515    0.719992    0.314677    11.00000    0.03157    0.03971 =
         0.04067   -0.00739    0.00962   -0.00292
O4    3    0.309185    0.256380    0.470769    11.00000    0.03255    0.05027 =
         0.03537   -0.00504   -0.00344   -0.00243
AFIX 147
H4    2    0.284720    0.287410    0.468684    11.00000   -1.50000
AFIX   0
C4    1    0.523864    0.409567    0.532756    11.00000    0.13570    0.04303 =
         0.05520    0.01716   -0.04107   -0.04194
AFIX  23
H4A   2    0.563068    0.440777    0.524414    11.00000   -1.20000
H4B   2    0.508565    0.413268    0.565418    11.00000   -1.20000
AFIX   0
S5    4    0.266452    0.412296    0.127974    11.00000    0.03974    0.03190 =
         0.05280   -0.00646    0.00597    0.00663
O5    3    0.461500    0.418425    0.456584    11.00000    0.12746    0.05094 =
         0.04395    0.02345   -0.02997   -0.02274
AFIX 147
H5    2    0.505572    0.398484    0.450353    11.00000   -1.50000
AFIX   0
C5    1    0.573132    0.356159    0.525414    11.00000    0.06726    0.07662 =
         0.03833    0.01411   -0.02177   -0.04299
AFIX  23
H5A   2    0.626866    0.355721    0.544948    11.00000   -1.20000
H5B   2    0.592958    0.354132    0.493293    11.00000   -1.20000
AFIX   0
S6    4   -0.141267    0.223834   -0.038076    11.00000    0.04743    0.03552 =
         0.06282   -0.00676   -0.00029   -0.00853
O6    3    0.560380    0.571449    0.271382    11.00000    0.04495    0.05203 =
         0.03650    0.01194    0.00344   -0.01020
AFIX 147
H6    2    0.520198    0.551031    0.260825    11.00000   -1.50000
AFIX   0
C6    1    0.516052    0.305431    0.536287    11.00000    0.04458    0.04220 =
         0.02775    0.00387   -0.00995   -0.01375
O7    3    0.401836    0.625750    0.299642    11.00000    0.05111    0.02685 =
         0.03738    0.00617   -0.00855   -0.00813
H7    2    0.082316    0.472574    0.084702    11.00000    0.09159
C7    1    0.570578    0.252875    0.530707    11.00000    0.03688    0.06372 =
         0.04875   -0.00219   -0.00798    0.00697
AFIX  23
H7A   2    0.623404    0.254803    0.550820    11.00000   -1.20000
H7B   2    0.591942    0.250371    0.498868    11.00000   -1.20000
REM #####
AFIX   0
HKLF 4


REM  t_a.res in P2(1)2(1)2(1)
REM wR2 = 0.143039, GooF = S = 0.99959, Restrained GooF = 0.99959 for all data
REM R1 = 0.051158 for 17030 Fo > 4sig(Fo) and 0.060463 for all 19396 data
REM 1252 parameters refined using 0 restraints

END

WGHT      0.0828      3.6795

REM Highest difference peak  0.792,  deepest hole -0.378,  1-sigma level  0.055
Q1    1  -0.0566  0.0524 -0.0449  11.00000  0.05    0.79
Q2    1   0.3195  0.0569  0.5086  11.00000  0.05    0.77
Q3    1   0.2700  0.0441  0.5509  11.00000  0.05    0.67
Q4    1   0.3449  0.1041  0.4947  11.00000  0.05    0.63
Q5    1   0.3408  0.0036  0.4808  11.00000  0.05    0.55
Q6    1   0.0336  0.4589  0.0000  11.00000  0.05    0.42
Q7    1   0.5853  0.3966  0.5175  11.00000  0.05    0.41
Q8    1   0.3197  0.1607  0.5217  11.00000  0.05    0.39
Q9    1   0.4535  0.1868  0.5534  11.00000  0.05    0.37
Q10   1   0.5019  0.4017  0.4974  11.00000  0.05    0.37
Q11   1   0.3543  0.3791  0.4843  11.00000  0.05    0.34
Q12   1   0.2992  0.4340  0.4919  11.00000  0.05    0.33
Q13   1   0.6189  0.3325  0.5169  11.00000  0.05    0.33
Q14   1   0.7683  0.6034  0.1827  11.00000  0.05    0.27
Q15   1   0.0173  0.5622  0.1464  11.00000  0.05    0.27
Q16   1   0.0522  0.1611  0.0022  11.00000  0.05    0.24
Q17   1   0.7959  0.6533  0.1653  11.00000  0.05    0.22
Q18   1  -0.1229  0.1136 -0.0263  11.00000  0.05    0.22
Q19   1  -0.1391  0.3595 -0.0130  11.00000  0.05    0.22
Q20   1   0.4774  0.3841  0.4398  11.00000  0.05    0.22
;
_shelx_res_checksum   28027

_shelx_hkl_file
;
  -1   0   0   -0.30    0.40
   1   0   0    0.40    0.40
   1   0   0   -0.90    0.80
  -1   0   0    0.30    0.30
   2   0   0 7937.11  336.07
  -3   0   0    1.60    1.40
   3   0   0    1.40    1.30
   3   0   0   -0.60    1.90
  -3   0   0    0.40    0.90
  -4   0   0  476.35   22.40
   4   0   0  546.75   24.30
   4   0   0  505.55   23.00
   5   0   0   -5.10    2.70
   5   0   0   -0.30    1.70
  -5   0   0    2.30    1.50
   6   0   0  780.52   35.20
  -6   0   0  770.02   34.20
   7   0   0    0.60    2.50
   8   0   0  418.16   21.20
   9   0   0   -2.20    3.70
  10   0   0   45.60    7.50
  11   0   0    4.60    2.40
  11   0   0    3.60    6.10
  12   0   0   98.39    7.70
  12   0   0  109.59   14.00
  13   0   0    7.10   10.20
  13   0   0    1.90    2.30
  14   0   0   -2.00    2.20
  15   0   0    0.10    2.00
  -1  -1   0 3769.32  163.88
   1   1   0 3986.90  164.08
  -2  -1   0 1898.41   85.89
  -2  -1   0 1994.30   85.49
   2  -1   0 2009.40   85.79
   2  -1   0 2077.59   86.49
   2   1   0 2037.50   85.59
   2   1   0 2070.99   86.19
  -2   1   0 2015.20   85.59
  -3  -1   0   17.50    1.80
  -3  -1   0   23.00    2.50
   3  -1   0   22.70    2.40
  -3   1   0   19.40    2.00
   3   1   0   19.90    2.20
  -4  -1   0 1089.49   48.50
   4  -1   0 1146.19   49.20
  -4  -1   0 1129.79   49.50
   4   1   0 1156.58   50.09
  -4   1   0 1109.69   48.70
   4   1   0 1139.69   49.10
  -5  -1   0   56.29    3.90
   5  -1   0   58.09    4.80
  -5  -1   0   63.79    4.90
   5   1   0   51.79    6.20
   5   1   0   58.39    4.40
  -6  -1   0  763.12   34.30
   6  -1   0  771.52   35.30
   6   1   0  801.22   35.30
  -7  -1   0  178.58    9.50
   7  -1   0  185.38   11.00
   7   1   0  185.18   10.70
   8  -1   0   81.09    7.00
   8   1   0   78.19    6.90
   9  -1   0    4.60    4.00
   9   1   0    1.60    3.80
  10  -1   0   59.99    7.80
  10   1   0   47.60    7.50
  11  -1   0   -7.90    5.20
  11  -1   0    0.40    2.70
  11   1   0    0.30    6.20
  11   1   0    1.50    2.50
  12  -1   0   87.39    7.20
  12  -1   0   96.79   12.30
  12   1   0   81.39    6.80
  12   1   0   99.99   13.70
  13  -1   0    3.80    2.50
  13  -1   0    5.00    9.20
  13   1   0    5.60    2.90
  13   1   0   19.20   10.90
  14  -1   0   98.29    7.30
  14   1   0   84.19    7.00
  15  -1   0    8.60    2.60
  15   1   0   13.90    2.90
   0  -2   0 2470.25  104.39
   1  -2   0    0.20    0.50
  -1  -2   0    1.40    0.60
   1   2   0    0.00    0.40
   1   2   0    0.30    0.80
  -2  -2   0  950.40   40.20
  -2  -2   0  895.31   40.50
   2  -2   0  957.10   40.40
   2   2   0  947.11   40.10
   2   2   0  932.11   40.60
  -3  -2   0   34.50    2.60
  -3  -2   0   36.90    3.20
   3  -2   0   38.00    3.20
   3   2   0   36.20    3.40
   3   2   0   37.70    2.80
   4  -2   0  886.11   38.20
  -4  -2   0  813.92   37.40
  -4  -2   0  869.61   38.40
   4   2   0  893.71   37.90
   4   2   0  861.21   38.80
   5  -2   0  931.01   39.80
  -5  -2   0  929.41   40.20
  -5  -2   0  829.12   38.70
   5   2   0  870.91   40.60
   5   2   0  899.91   39.40
   6  -2   0  169.68    9.70
  -6  -2   0  154.78    9.80
  -6  -2   0  168.48    8.60
   6   2   0  169.38    9.50
   7  -2   0  419.96   20.50
  -7  -2   0  396.56   18.90
   7   2   0  408.16   20.00
   8  -2   0   12.10    4.00
   8   2   0   11.80    3.60
   9  -2   0   17.80    4.60
   9   2   0   23.20    4.80
  10  -2   0    4.20    4.40
  10   2   0   -4.40    4.10
  11  -2   0  125.09   12.90
  11  -2   0  136.29    9.00
  11   2   0  143.99   13.40
  11   2   0  127.39    8.60
  12  -2   0   34.00    9.20
  12  -2   0   23.70    4.20
  12   2   0   23.60    3.80
  12   2   0   25.80    9.50
  13  -2   0    9.50    9.60
  13  -2   0   11.60    3.20
  13   2   0    8.00    2.90
  13   2   0    1.10   10.80
  14  -2   0    4.70    2.70
  14   2   0   -1.70    2.10
  15  -2   0    2.50    2.20
  15   2   0    8.40    2.50
   0  -3   0    0.50    0.40
  -2  -3   0   71.39    4.00
   2  -3   0   73.99    4.20
   2   3   0   66.29    4.20
   2   3   0   76.99    3.80
   3  -3   0  153.68    7.80
  -3  -3   0  135.39    7.80
  -3  -3   0  138.09    7.20
   3   3   0  157.98    8.10
   3   3   0  152.28    7.30
  -4  -3   0 2754.32  120.29
   4  -3   0 2916.91  120.99
  -4  -3   0 2794.82  121.19
   4   3   0 2878.31  120.49
   4   3   0 2781.12  121.29
  -5  -3   0    5.60    1.80
   5  -3   0    9.90    2.40
  -5  -3   0    5.90    2.40
   5   3   0   10.60    3.10
   5   3   0    6.20    1.90
   6  -3   0 1378.06   59.59
  -6  -3   0 1382.16   60.09
  -6  -3   0 1286.77   58.29
   6   3   0 1314.97   60.39
   6   3   0 1379.16   59.19
   7  -3   0    4.30    2.70
  -7  -3   0   10.40    3.20
  -7  -3   0    6.20    2.40
   7   3   0    4.90    2.80
   8  -3   0  296.97   16.10
  -8  -3   0  260.57   14.00
   8   3   0  303.17   15.60
   9  -3   0   77.29    7.70
   9   3   0   71.09    8.00
  10  -3   0   49.99    7.30
  10   3   0   39.70    7.00
  11  -3   0   11.10    6.30
  11  -3   0   17.90    4.00
  11   3   0   11.30    7.20
  11   3   0   16.20    3.40
  12  -3   0  174.08   11.00
  12  -3   0  192.38   16.90
  12   3   0  172.38   16.80
  12   3   0  173.38   10.50
  13  -3   0   60.39   11.20
  13  -3   0   65.89    6.50
  13   3   0   72.19   13.20
 -13   3   0   56.39    8.20
  13   3   0   63.79    6.00
  14  -3   0   59.19    6.00
  14   3   0   52.59    5.50
 -14   3   0   52.59    7.70
  15  -3   0    1.40    2.30
 -15   3   0   -4.70    4.00
  15   3   0    2.90    2.10
   0  -4   0   92.39    4.30
  -1  -4   0   65.59    3.90
   1  -4   0   73.09    3.80
   1   4   0   71.59    4.00
  -2  -4   0   39.70    2.80
   2  -4   0   37.10    2.90
   2   4   0   34.70    2.40
   2   4   0   37.70    2.90
   3  -4   0  946.31   40.30
  -3  -4   0  878.51   39.90
   3   4   0  918.51   40.40
   3   4   0  936.91   39.80
   4  -4   0 2654.83  113.29
  -4  -4   0 2688.53  113.59
  -4  -4   0 2551.04  112.69
   4   4   0 2622.34  113.39
   4   4   0 2687.53  112.69
  -5  -4   0   23.80    3.00
   5  -4   0   28.20    3.50
  -5  -4   0   29.10    3.70
   5   4   0   19.50    3.70
   5   4   0   22.30    3.10
   6  -4   0  101.89    7.20
  -6  -4   0   90.49    6.10
  -6  -4   0  110.79    7.50
   6   4   0   98.49    8.00
   6   4   0  111.09    6.70
   7  -4   0   68.69    6.10
  -7  -4   0   62.29    5.10
  -7  -4   0   61.29    6.10
   7   4   0   68.79    6.10
  -8  -4   0    3.00    3.00
   8  -4   0    3.70    3.30
  -8  -4   0    0.40    3.10
   8   4   0    5.10    3.40
   9  -4   0   46.90    7.20
   9   4   0   56.09    6.70
  10  -4   0   46.80    7.60
  10   4   0   48.20    7.30
  11  -4   0   25.60    6.80
  11  -4   0   37.10    5.80
  11   4   0   30.80    4.80
  11   4   0   25.30    7.50
  12  -4   0   99.39   13.00
  12  -4   0  126.69    8.70
  12   4   0  102.99    9.90
  12   4   0  113.29    7.90
  12   4   0  113.89   15.50
 -12   4   0  111.49    9.40
  13  -4   0   -4.80    2.50
  13  -4   0    3.20   10.00
  13   4   0    0.60    2.30
 -13   4   0    6.30    4.00
  13   4   0   -4.00   12.20
  14  -4   0   28.70    4.80
  14   4   0   18.90    3.30
 -14   4   0   13.10    4.20
  15  -4   0   77.29    6.50
  15   4   0   74.59    5.80
 -15   4   0   72.29    8.20
 -16   4   0   46.20    6.70
   0  -5   0    1.00    0.70
   1  -5   0   95.49    4.90
   1   5   0   89.09    5.20
  -2  -5   0  459.45   20.70
   2  -5   0  489.75   20.80
   2   5   0  436.96   20.60
   3  -5   0 2692.73  112.79
  -3  -5   0 2712.83  112.59
   3   5   0 2625.94  112.09
   3   5   0 2509.75  112.59
  -4  -5   0   18.20    2.80
   4  -5   0   26.70    3.40
  -4  -5   0   20.40    3.20
   4   5   0   16.10    2.60
   4   5   0   23.80    3.50
  -5  -5   0   98.39    6.40
   5  -5   0  119.59    7.10
  -5  -5   0  107.09    7.30
   5   5   0  106.89    6.50
   5   5   0  103.19    7.40
  -6  -5   0  304.17   15.90
   6  -5   0  360.66   17.40
  -6  -5   0  325.37   17.50
   6   5   0  362.56   16.70
   6   5   0  336.37   17.70
  -7  -5   0    0.80    2.50
  -7  -5   0   -1.00    2.60
   7  -5   0   -0.90    2.90
   7   5   0    0.00    2.70
   8  -5   0   50.29    5.80
  -8  -5   0   44.20    6.20
  -8  -5   0   40.70    5.30
   8   5   0   36.90    5.90
   9  -5   0    1.60    4.00
   9   5   0   11.20    4.50
  10  -5   0    5.90    5.30
  10   5   0   10.40    5.90
  11  -5   0   52.39    9.00
  11  -5   0   46.30    6.40
  11   5   0   50.89    9.30
  11   5   0   58.99    5.50
  12  -5   0   40.50   10.00
  12  -5   0   33.50    5.40
 -12   5   0   24.80    4.60
  12   5   0   34.50    4.70
  12   5   0   22.00    5.20
  12   5   0   28.30   10.30
  13  -5   0   84.59    7.50
  13  -5   0   85.89   14.70
  13   5   0   80.49    6.50
 -13   5   0   72.99    8.00
  13   5   0   87.29    8.70
  14  -5   0   57.79    6.10
  14   5   0   55.39    5.50
 -14   5   0   53.29    7.20
  15  -5   0   28.20    4.50
  15   5   0   22.50    3.60
 -15   5   0   24.00    4.60
 -16   5   0    2.50    3.60
 -17   5   0    7.70    4.00
   0  -6   0  915.81   39.20
   1  -6   0   68.49    4.00
  -1  -6   0   67.29    3.40
   1   6   0   71.89    4.50
  -2  -6   0  675.03   30.30
   2  -6   0  725.63   30.30
   2   6   0  655.13   30.10
  -3  -6   0   51.39    4.00
   3  -6   0   49.10    4.10
   3   6   0   54.29    4.00
  -4  -6   0 1832.42   77.29
   4  -6   0 1809.02   77.59
   4   6   0 1730.33   77.39
   4   6   0 1784.32   76.79
  -5  -6   0 1224.18   54.89
   5  -6   0 1259.67   55.59
  -5  -6   0 1252.77   56.09
   5   6   0 1261.67   54.79
   5   6   0 1285.17   55.69
  -6  -6   0  117.49    7.50
   6  -6   0  129.29    8.60
  -6  -6   0  119.19    8.50
   6   6   0  133.19    8.90
   6   6   0  114.49    7.50
  -7  -6   0  366.66   18.30
   7  -6   0  391.76   19.80
  -7  -6   0  375.86   20.20
   7   6   0  403.26   19.20
   8  -6   0    6.60    3.40
  -8  -6   0    2.40    3.30
  -8  -6   0    7.10    3.60
   8   6   0    4.00    3.60
  -9  -6   0   -0.80    4.40
   9  -6   0    8.50    4.70
   9   6   0    5.20    4.60
  10  -6   0   39.20    7.20
  10   6   0   26.50    7.10
  11  -6   0  144.89    9.70
  11  -6   0  150.68   13.60
  11   6   0  112.69   10.20
 -11   6   0  119.09    9.60
  11   6   0  148.19   14.50
  11   6   0  126.69    8.30
  12  -6   0    9.20    8.50
  12  -6   0   -2.70    2.90
 -12   6   0   -1.70    3.50
  12   6   0   -0.90    4.00
  12   6   0    3.30    2.40
  13  -6   0   93.29    8.00
  13   6   0  107.49    8.80
  13   6   0   94.29    6.90
  14  -6   0   66.19    6.50
 -14   6   0   67.99    7.40
  14   6   0   72.89    5.80
  14   6   0   49.70    7.30
  15   6   0    1.20    1.80
 -15   6   0    5.50    3.20
 -16   6   0   -0.10    3.00
 -17   6   0   -4.30    3.20
   0  -7   0    0.10    1.00
  -1  -7   0 2223.68   93.39
   1  -7   0 2208.18   92.79
  -1  -7   0 2169.68   92.19
   1   7   0 2101.09   93.19
   2  -7   0  110.99    6.10
  -2  -7   0  100.09    6.30
   2   7   0  112.09    6.10
  -3  -7   0   99.29    6.20
   3  -7   0  108.29    6.40
   3   7   0  100.29    6.10
   4  -7   0    2.30    1.90
  -4  -7   0   -3.20    1.90
   4   7   0   -1.00    1.80
  -5  -7   0  444.66   22.10
  -5  -7   0  424.86   21.00
   5  -7   0  441.06   21.40
   5   7   0  464.85   21.40
  -6  -7   0  262.67   14.90
   6  -7   0  251.57   14.30
  -6  -7   0  256.97   13.60
   6   7   0  276.67   13.60
   6   7   0  275.97   14.60
   7  -7   0   79.09    7.50
  -7  -7   0   81.39    7.40
  -7  -7   0   84.29    6.80
   7   7   0   86.69    6.80
  -8  -7   0  224.18   13.50
   8  -7   0  267.37   15.20
  -8  -7   0  261.47   15.80
   8   7   0  271.27   14.80
  -9  -7   0  863.41   41.80
   9  -7   0  842.12   40.60
   9   7   0  824.12   39.90
  10  -7   0   37.20    7.30
  11  -7   0   95.69   12.00
  11  -7   0   57.49    7.70
  11   7   0   80.39    8.30
  11   7   0   65.29    5.80
 -11   7   0   71.09    7.40
  12  -7   0   67.29    7.00
  12  -7   0   54.59   10.90
 -12   7   0   53.59    6.60
  12   7   0   40.30    7.10
  12   7   0   59.99    5.30
  13  -7   0   28.30    4.60
  13   7   0   24.70    4.90
  13   7   0   33.60    4.10
 -13   7   0   27.90    4.90
  14  -7   0   44.90    5.70
  14   7   0   40.40    6.70
 -14   7   0   50.69    6.30
  14   7   0   48.00    4.70
 -15   7   0   47.40    6.20
 -16   7   0    2.90    2.90
 -17   7   0   13.10    3.30
   0  -8   0 2715.73  115.29
   1  -8   0 1123.59   48.80
  -1  -8   0 1128.89   49.60
  -1  -8   0 1108.69   48.10
   1   8   0 1161.68   49.40
  -2  -8   0 2064.99   86.99
  -2  -8   0 1914.31   85.39
   2  -8   0 2112.19   86.59
   2   8   0 2042.00   86.49
  -2   8   0 1945.81   88.19
   3  -8   0  675.93   30.30
  -3  -8   0  670.63   30.50
   3   8   0  669.73   29.90
  -4  -8   0 1062.79   48.10
   4  -8   0 1123.59   48.30
   4   8   0 1074.99   47.70
   5  -8   0 1502.75   66.69
  -5  -8   0 1518.15   67.49
  -5  -8   0 1482.45   66.29
   5   8   0 1550.74   66.29
  -6  -8   0  290.87   15.70
   6  -8   0  311.77   16.50
  -6  -8   0  312.27   17.10
   6   8   0  314.87   16.20
   7  -8   0  109.09    8.30
  -7  -8   0   86.39    7.70
  -7  -8   0   99.69    8.50
  -8  -8   0    7.30    4.40
  -8  -8   0   11.20    4.60
   8  -8   0   11.60    4.70
   9  -8   0  284.57   17.80
  -9  -8   0  321.77   19.60
  10  -8   0   52.59    8.40
 -10   8   0   73.09    9.90
  11  -8   0  405.56   20.70
  11  -8   0  413.56   24.60
 -11   8   0  384.46   20.10
  11   8   0  376.26   18.70
  11   8   0  365.96   20.30
  12  -8   0   97.39   15.80
  12  -8   0   90.99    8.40
  12   8   0   93.59    6.70
  12   8   0  101.89    8.60
 -12   8   0   94.79    8.30
  13  -8   0   94.59    8.10
  13   8   0   91.49    8.50
 -13   8   0   98.79    8.40
  13   8   0  103.39    6.70
  14   8   0    1.70    1.90
  14   8   0   -3.10    3.20
 -14   8   0    2.80    2.90
 -15   8   0    1.60    2.90
  15   8   0    3.00    3.60
 -16   8   0    2.30    2.50
 -17   8   0   -4.30    2.30
   0  -9   0    2.40    1.40
  -1  -9   0 1504.25   66.09
   1  -9   0 1604.04   66.99
  -1  -9   0 1526.65   67.89
   1   9   0 1595.44   67.59
  -2  -9   0   27.10    3.50
   2  -9   0   25.70    3.30
  -2   9   0   31.40    6.10
   2   9   0   30.80    3.40
  -3  -9   0 3322.37  137.39
   3  -9   0 3275.37  136.99
  -3  -9   0 3005.50  135.39
   3   9   0 3193.38  136.39
  -4  -9   0  231.58   12.80
   4  -9   0  237.18   12.80
   4   9   0  251.57   12.20
  -5  -9   0   77.19    6.50
   5  -9   0   81.59    6.50
  -5  -9   0   83.39    7.10
   5   9   0   77.79    6.10
  -6  -9   0  413.16   20.10
  -6  -9   0  392.86   21.30
   6  -9   0  392.16   20.50
   6   9   0  412.16   20.00
  -7  -9   0   83.39    7.90
   7  -9   0   91.59    8.40
  -7  -9   0   95.19    8.70
   8  -9   0   66.29    8.00
  -8  -9   0   89.59    9.00
   9  -9   0   91.59   10.50
  -9  -9   0  109.59   10.60
 -10  -9   0 1243.88   57.39
  10  -9   0 1209.28   55.69
 -10   9   0 1139.39   52.29
  10   9   0 1076.49   50.89
  10   9   0 1160.18   52.59
  11  -9   0  265.57   18.90
  11  -9   0  265.47   15.60
  11   9   0  239.88   13.10
  11   9   0  273.57   15.30
 -11   9   0  259.17   14.70
  12  -9   0   -5.00    9.00
  12  -9   0    6.00    3.60
  12   9   0    7.70    3.80
 -12   9   0    9.30    3.50
  12   9   0    4.50    2.20
  13  -9   0    6.60    3.40
 -13   9   0   11.20    3.70
  13   9   0    8.00    2.30
  13   9   0   11.70    3.80
  14   9   0   37.70    3.70
 -14   9   0   43.50    5.50
  14   9   0   24.60    4.40
  15   9   0   11.60    3.70
 -16   9   0   42.10    5.30
 -17   9   0   49.99    4.80
   0 -10   0  595.24   26.00
   1 -10   0   13.10    2.30
  -1 -10   0    7.50    2.50
   1  10   0    6.00    2.40
   2 -10   0  832.32   36.40
  -2 -10   0  848.42   37.30
   2  10   0  810.72   36.20
  -2  10   0  785.42   38.70
  -3 -10   0  197.48   11.30
   3 -10   0  193.48   10.70
  -3  10   0  202.58   17.10
   3  10   0  196.58   10.10
  -4 -10   0   21.10    4.00
   4 -10   0   15.20    3.50
   4  10   0   21.70    3.50
  -5 -10   0    2.00    3.00
   5 -10   0    2.90    3.20
   5  10   0    4.00    2.60
  -6 -10   0   77.79    7.90
   6 -10   0   92.99    7.90
  -6 -10   0   86.09    8.20
   7 -10   0  317.57   18.50
  -7 -10   0  362.96   20.00
  -7 -10   0  328.47   18.10
  -8 -10   0   33.40    6.80
   8 -10   0   35.20    6.10
  -9 -10   0    3.70    6.20
   9 -10   0   19.80    6.30
  10 -10   0  191.68   15.30
  10 -10   0  194.38   13.40
 -10 -10   0  218.08   17.90
  10  10   0  201.38   12.70
  10  10   0  191.28   10.70
 -10  10   0  212.48   12.40
  11 -10   0   30.30    4.90
  11 -10   0   37.70    9.80
 -11  10   0   35.60    5.80
  11  10   0   28.50    4.20
  11  10   0   40.20    6.50
  12 -10   0   17.00    4.30
  12  10   0   10.10    3.70
 -12  10   0   10.90    3.90
  13  10   0   58.09    7.00
 -13  10   0   70.19    6.80
  13  10   0   69.09    5.10
 -14  10   0   -3.70    2.60
  14  10   0   -0.10    3.10
 -15  10   0   84.69    6.80
  15  10   0   76.79    6.80
 -16  10   0   18.70    3.30
   0 -11   0    0.30    1.70
   1 -11   0   26.60    3.50
  -1 -11   0   33.10    4.20
   1  11   0   26.00    4.00
  -1  11   0   27.60    5.60
  -2 -11   0  419.96   21.10
   2 -11   0  404.86   19.90
  -2  11   0  427.26   23.20
   2  11   0  455.85   19.90
   3 -11   0  385.26   19.00
  -3 -11   0  420.06   20.00
  -3  11   0  351.46   24.20
   3  11   0  403.96   18.20
   4 -11   0   46.50    5.40
  -4 -11   0   40.40    5.50
   4  11   0   36.80    3.90
  -5 -11   0 1316.47   58.59
   5 -11   0 1295.87   58.19
   5  11   0 1293.27   56.69
   6 -11   0    5.40    3.60
  -6 -11   0    1.00    4.40
  -6 -11   0    4.20    4.00
  -7 -11   0   27.70    6.20
  -7 -11   0   10.90    6.00
   7 -11   0   13.70    4.60
  -8 -11   0  250.27   17.60
   8 -11   0  251.87   16.30
  -9 -11   0   16.10    7.80
   9 -11   0   22.90    7.40
  -9  11   0   30.60    4.50
   9  11   0   35.10    5.20
   9  11   0   35.60    5.30
  10 -11   0   39.30    8.90
  10 -11   0   59.29    8.20
 -10 -11   0   37.00   10.10
 -10  11   0   50.59    6.00
  10  11   0   42.80    4.90
  10  11   0   54.89    6.70
  11 -11   0   62.09    7.80
  11 -11   0   93.79   14.70
 -11  11   0   70.89    6.90
  11  11   0   79.89    7.80
  11  11   0   72.59    5.50
 -12  11   0   25.60    4.50
  12  11   0   20.50    2.80
  12  11   0   15.10    4.10
 -13  11   0    2.30    2.80
  13  11   0    0.40    3.00
  14  11   0    2.60    3.10
 -14  11   0    0.10    2.60
 -15  11   0    3.00    2.20
  15  11   0    3.30    2.70
 -16  11   0   39.80    4.50
   0 -12   0  782.42   35.40
   0 -12   0  694.93   32.60
   0  12   0  801.02   35.10
  -1 -12   0   12.00    3.20
   1 -12   0   10.90    2.80
  -1  12   0    8.70    5.20
   1  12   0    8.70    2.90
   2 -12   0  263.37   13.40
  -2 -12   0  279.17   14.80
  -2  12   0  258.07   17.90
   2  12   0  257.67   13.00
   3 -12   0  391.76   18.90
  -3 -12   0  395.66   19.80
  -3  12   0  334.47   25.70
   3  12   0  389.66   17.50
   4 -12   0  293.37   15.60
  -4 -12   0  306.97   16.20
   4  12   0  272.37   13.30
   5 -12   0   52.29    6.90
  -5 -12   0   76.59    8.10
   6 -12   0    9.30    4.30
  -6 -12   0   10.90    5.50
  -6 -12   0    8.30    4.50
   7 -12   0   22.70    6.00
  -7 -12   0   25.00    7.10
  -7 -12   0   30.70    7.20
   8 -12   0   10.20    5.80
  -8 -12   0    3.70    5.90
  -8  12   0   14.40    5.50
  -9 -12   0  278.17   19.60
   9 -12   0  262.07   17.80
  -9  12   0  238.28   14.20
   9  12   0  272.37   15.10
   9  12   0  275.97   15.40
 -10 -12   0  163.08   17.80
  10 -12   0  142.59   15.80
  10  12   0  151.38   10.90
  10  12   0  161.58   10.90
 -10  12   0  155.18   10.40
  10  12   0  173.28   11.00
  11 -12   0   66.59   12.70
 -11  12   0   95.99    7.90
  11  12   0  102.19    8.50
  12  12   0    9.80    3.60
 -12  12   0    5.40    2.80
 -13  12   0    1.70    2.50
  13  12   0    7.70    3.10
  14  12   0   25.30    4.10
 -14  12   0   35.50    4.70
  15  12   0    1.70    2.60
 -15  12   0    2.30    2.30
 -16  12   0   -1.10    1.90
   0 -13   0   -1.80    2.70
   0  13   0    1.30    4.10
   0  13   0   -1.20    3.00
   1 -13   0  550.44   27.00
  -1 -13   0  636.64   29.70
  -1  13   0  598.64   30.00
   1  13   0  624.24   28.00
   1  13   0  622.14   28.00
  -2 -13   0  153.68   10.50
   2 -13   0  145.19    9.10
  -2  13   0  149.79   14.80
   2  13   0  152.98    8.20
  -3 -13   0   13.70    4.00
   3 -13   0    9.00    3.70
  -4 -13   0  121.19    9.80
   4 -13   0  129.59    9.50
   5 -13   0    8.90    4.60
  -5 -13   0   18.00    5.30
  -6 -13   0    5.40    5.80
  -6 -13   0   -6.90    5.00
   6 -13   0   -0.50    4.70
  -7 -13   0   -8.10    5.10
  -7 -13   0   -0.20    7.20
   7 -13   0    4.70    5.70
  -8 -13   0   64.19   11.50
   8 -13   0   44.30    8.60
  -8  13   0   50.99    5.40
   8  13   0   45.70    6.30
   8  13   0   49.10    6.90
  -9 -13   0   28.10   10.20
   9 -13   0   47.20    9.60
  -9  13   0   49.99    5.80
  -9  13   0   28.90    5.00
   9  13   0   43.50    6.10
   9  13   0   44.80    6.70
  10 -13   0   93.89   16.20
 -10 -13   0   91.49   15.10
 -10  13   0  107.29    8.10
 -10  13   0   85.49    8.80
  10  13   0  107.69    8.60
  10  13   0  114.29    8.90
  11  13   0   18.90    4.40
 -11  13   0   20.30    3.60
  12  13   0   27.90    4.70
 -12  13   0   32.90    5.10
  13  13   0   14.50    3.50
 -13  13   0   16.50    3.30
 -14  13   0   30.20    4.50
  14  13   0   28.10    4.10
  15  13   0    3.40    2.40
 -15  13   0    6.10    2.30
 -16  13   0    0.60    1.60
   0 -14   0  138.59   10.30
   0  14   0  150.68    9.80
   0  14   0  122.29   10.50
  -1 -14   0   66.29    6.70
   1 -14   0   71.79    7.20
  -1  14   0   79.69   10.40
   1  14   0   60.39    5.80
   1  14   0   58.49    6.60
   2 -14   0   79.99    7.20
  -2 -14   0   88.29    7.90
   2  14   0   79.09    5.00
   2  14   0   85.29    5.50
  -3 -14   0   15.00    5.00
   3 -14   0   29.00    4.80
  -4 -14   0  124.89   10.70
   4 -14   0  133.59   10.10
  -5 -14   0    8.90    5.70
   5 -14   0   13.40    5.50
  -6 -14   0  147.89   12.90
   6 -14   0  105.19   11.30
  -6 -14   0  124.89   13.20
  -7 -14   0   55.49    9.60
   7 -14   0   35.70    8.00
  -7  14   0   46.30    5.60
   7  14   0   59.79    6.90
   7  14   0   45.40    5.60
   8 -14   0  533.95   30.20
  -8 -14   0  583.74   31.90
   8  14   0  576.04   27.30
  -8  14   0  565.94   26.60
   8  14   0  579.14   27.50
  -8  14   0  480.55   26.30
  -9 -14   0   53.59   11.10
   9 -14   0   55.89   10.70
  -9  14   0   54.09    5.80
  -9  14   0   40.60    7.20
   9  14   0   45.60    6.90
   9  14   0   61.49    6.70
  10 -14   0    1.00   11.10
 -10 -14   0    4.00   10.80
  10  14   0   16.60    3.90
  10  14   0   11.40    3.70
 -10  14   0   13.80    4.30
 -10  14   0    7.90    2.80
  11  14   0   26.80    4.60
 -11  14   0   21.50    3.90
  12  14   0   31.40    4.90
 -12  14   0   29.80    5.00
 -13  14   0   47.40    5.50
  13  14   0   57.79    6.00
 -14  14   0   79.79    6.30
  14  14   0   71.89    6.50
  15  14   0    2.70    2.30
 -15  14   0    8.90    2.30
   0 -15   0    5.90    4.30
   0  15   0    1.10    3.60
   0  15   0    6.10    4.70
  -1 -15   0   44.20    6.50
   1 -15   0   42.70    7.00
  -1  15   0   35.00    5.90
   1  15   0   36.20    4.70
  -1  15   0   20.30    7.10
   1  15   0   39.50    5.70
  -3 -15   0  142.09   10.70
   3 -15   0  110.19    9.90
   4 -15   0   10.20    5.90
  -4 -15   0   11.50    5.40
  -5 -15   0    2.20    6.30
   5 -15   0    5.70    6.40
  -6 -15   0   37.60    8.60
   6 -15   0   37.60    8.30
  -6 -15   0   36.10    9.70
   6  15   0   33.60    4.90
  -6  15   0   40.90    4.90
   6  15   0   26.80    4.80
  -7 -15   0  160.08   14.30
   7 -15   0  150.38   15.00
   7  15   0  149.88   10.40
  -7  15   0  140.89    9.20
  -7  15   0  121.49    9.70
   7  15   0  153.48   10.30
   8 -15   0   -6.70    9.30
  -8 -15   0    1.50    8.00
   8  15   0   -2.40    3.60
   8  15   0    1.70    3.00
  -8  15   0    2.20    3.60
  -8  15   0    2.30    2.70
   9 -15   0   36.30   11.70
  -9 -15   0   39.00   11.10
  -9  15   0   52.99    6.80
  -9  15   0   42.20    5.50
   9  15   0   50.29    6.40
   9  15   0   49.90    6.20
  10  15   0    9.20    3.50
  10  15   0   12.30    3.50
 -10  15   0    1.60    3.80
 -10  15   0    8.00    2.80
 -11  15   0   21.60    3.90
  11  15   0   16.50    3.70
 -12  15   0   14.50    3.10
  12  15   0   13.90    3.70
 -13  15   0   21.00    3.50
  13  15   0   17.00    3.40
 -14  15   0   38.60    4.20
  14  15   0   35.10    4.60
  15  15   0    7.80    2.30
 -15  15   0    7.70    2.10
   0 -16   0  275.37   17.50
   0  16   0  264.97   15.60
   0  16   0  281.07   15.10
  -1 -16   0  103.39    9.70
   1 -16   0  108.29    9.70
   1  16   0   93.29    5.90
  -1  16   0   96.09    9.50
   1  16   0   93.79    6.20
   2 -16   0   30.50    6.30
  -2 -16   0   24.70    6.30
   3 -16   0   10.50    5.40
  -3 -16   0    3.70    5.60
  -4 -16   0  413.76   23.90
   5 -16   0   24.90   15.20
  -5 -16   0   68.69   11.70
   5  16   0   58.79    6.90
   5  16   0   58.09    6.30
  -5  16   0   47.80    6.00
  -5  16   0   58.29    6.10
  -6 -16   0   42.60   10.60
   6 -16   0   25.60    9.60
  -6 -16   0   22.70    8.20
   6  16   0   29.70    5.10
   6  16   0   32.00    4.90
  -6  16   0   34.10    5.00
  -6  16   0   35.80    4.80
   7 -16   0  272.07   21.20
  -7 -16   0  251.97   20.30
  -7  16   0  247.88   13.50
   7  16   0  248.88   14.40
  -7  16   0  211.28   13.70
   7  16   0  245.78   14.30
  -8 -16   0   51.29   12.00
   8 -16   0   51.09   13.60
  -8  16   0   83.79    7.00
   8  16   0   77.59    7.30
   8  16   0   82.49    7.80
  -9 -16   0    5.10   16.40
   9 -16   0   -8.00   11.30
   9 -16   0   21.70   15.30
   9  16   0    6.70    3.40
  -9  16   0    2.70    2.80
   9  16   0    6.90    3.40
  -9  16   0    5.30    3.70
  10  16   0   89.29    8.00
 -10  16   0   97.49    7.50
  10  16   0   90.89    7.80
 -10  16   0   71.59    7.70
 -11  16   0   53.69    5.90
  11  16   0   65.29    6.60
  12  16   0   14.10    3.40
 -12  16   0   25.20    4.50
  13  16   0   32.10    4.80
 -13  16   0   35.30    4.50
  14  16   0    1.50    2.20
 -14  16   0    0.20    1.60
  15  16   0   34.90    3.70
 -15  16   0   35.80    3.50
   0 -17   0  -13.60    4.60
   0  17   0   -2.10    3.40
   0  17   0    5.30    4.30
   1 -17   0   22.00    6.40
  -1 -17   0   17.70    5.80
  -1  17   0   19.40    5.40
   2 -17   0  124.99   12.80
  -2 -17   0  137.69   12.20
  -2  17   0  147.49   12.90
   3 -17   0   44.70    8.40
  -3 -17   0   28.90    7.60
   3  17   0   32.50    5.60
  -3  17   0   51.09    6.30
  -4 -17   0   14.20    8.00
   4 -17   0   26.40    6.90
  -4  17   0    8.40    2.90
  -4  17   0    6.10    3.20
  -4  17   0   10.50    3.70
   4  17   0   11.50    3.90
   4  17   0   13.70    3.90
  -5 -17   0   19.50    8.90
   5 -17   0   25.60    7.70
  -5  17   0   21.30    3.90
  -5  17   0   19.30    3.30
   5  17   0   21.00    4.80
  -5  17   0   15.00    3.90
   5  17   0   20.60    3.90
  -6 -17   0  623.64   34.60
   6 -17   0  642.04   32.70
  -6  17   0  526.45   27.60
   6  17   0  572.74   28.20
   6  17   0  579.64   28.20
  -6  17   0  534.65   27.00
   7 -17   0   23.80   10.10
  -7 -17   0   23.20   10.60
   7  17   0   30.40    5.00
   7  17   0   37.70    5.50
  -7  17   0   44.10    6.10
  -7  17   0   31.60    4.90
   8 -17   0   28.90   12.20
  -8 -17   0   54.99   12.90
   8  17   0   40.10    6.40
  -8  17   0   30.10    4.90
   8  17   0   40.90    5.80
  -8  17   0   42.40    6.20
   9  17   0   23.30    4.40
  -9  17   0   17.50    3.40
   9  17   0   15.00    4.00
  -9  17   0   17.10    3.90
  10  17   0   41.70    6.10
 -10  17   0   34.50    4.70
  10  17   0   33.80    5.30
 -10  17   0   47.60    5.20
  11  17   0    7.00    3.00
 -11  17   0    3.90    2.40
 -12  17   0    7.20    2.50
  12  17   0   -0.30    2.30
  13  17   0   -1.10    2.20
 -13  17   0    0.20    1.70
  14  17   0    7.80    2.30
   0 -18   0   46.60    8.40
   0  18   0   57.89    6.90
   1 -18   0  514.55   28.40
  -1 -18   0  523.05   28.30
  -1  18   0  528.75   25.20
  -1  18   0  508.45   25.20
  -1  18   0  486.25   24.30
   1  18   0  505.75   25.30
  -1  18   0  460.55   25.60
  -2 -18   0    4.80    6.70
   2 -18   0   16.60    6.60
  -2  18   0    6.70    3.40
   2  18   0    5.90    3.30
  -2  18   0    5.00    9.50
   2  18   0    5.30    3.60
  -2  18   0   14.80    4.10
  -2  18   0   12.80    6.30
  -3 -18   0  761.52   39.70
   3 -18   0  809.82   39.70
  -3  18   0  741.43   35.70
  -3  18   0  819.62   39.30
  -3  18   0  701.23   34.20
   3  18   0  760.92   36.00
  -3  18   0  770.42   35.20
   3  18   0  727.53   35.40
   4 -18   0  357.36   22.40
  -4 -18   0  271.87   21.90
  -4  18   0  296.27   15.50
   4  18   0  296.57   16.40
  -4  18   0  301.57   16.70
  -4  18   0  312.27   16.30
   4  18   0  316.37   17.20
  -5 -18   0   60.79   11.20
   5 -18   0   72.29   12.10
  -5 -18   0   57.99   12.90
  -5  18   0   56.09    6.70
  -5  18   0   62.89    5.90
   5  18   0   73.59    7.00
   5  18   0   55.49    7.20
   6 -18   0   -1.00    9.20
  -6 -18   0    2.40    9.70
  -6  18   0    1.90    2.40
  -6  18   0    9.80    3.40
   6  18   0   -1.90    2.80
   6  18   0   -2.20    2.90
   7 -18   0   12.70   10.60
  -7 -18   0   11.30   11.80
  -7  18   0    5.10    3.60
   7  18   0   10.30    3.30
  -7  18   0   12.00    3.10
   7  18   0   13.00    3.80
   8  18   0   12.60    3.50
  -8  18   0    9.50    3.70
   8  18   0    7.60    3.40
  -8  18   0    9.10    3.10
  -9  18   0   -2.20    2.30
   9  18   0   -2.70    2.80
  -9  18   0   -0.60    3.30
   9  18   0   -1.00    2.80
  10  18   0   44.40    5.80
 -10  18   0   46.40    5.30
  10  18   0   45.10    6.00
 -11  18   0   13.10    2.90
  11  18   0   10.00    3.10
  12  18   0   17.30    3.40
  13  18   0    4.40    2.30
 -13  18   0   -1.10    1.60
  14  18   0    2.30    1.80
 -14  18   0    1.90    1.60
   0 -19   0    0.80    7.80
   0  19   0   -1.60    2.80
   0  19   0   -0.40    3.30
   0  19   0    3.30    3.70
   1 -19   0  143.89   14.80
  -1 -19   0  136.39   15.40
  -1  19   0  146.89   10.20
  -1  19   0  138.89    9.00
   1  19   0  138.49   10.10
   1  19   0  123.69    9.50
  -1  19   0  131.89   10.20
  -1  19   0  116.49    8.90
   1  19   0  133.49    9.10
   2 -19   0   94.09   14.10
  -2 -19   0   93.69   12.90
   2  19   0  114.19    9.00
   2  19   0  104.29    8.60
   2  19   0  125.39    8.60
  -2  19   0  111.59   11.80
  -2  19   0  100.79    8.70
  -2  19   0  116.49    8.40
  -2  19   0   96.49    7.50
   3 -19   0   42.10    9.90
  -3 -19   0   24.20   10.40
   3  19   0   43.10    6.90
  -3  19   0   39.40    5.20
   3  19   0   36.30    6.20
  -3  19   0   34.10    5.30
  -3  19   0   31.80    4.60
  -3  19   0   41.90    8.40
   3  19   0   37.00    5.60
   4 -19   0   56.19   11.20
  -4 -19   0   79.69   14.00
  -4  19   0   57.99    7.00
  -4  19   0   67.79    5.90
  -4  19   0   69.79    6.30
   4  19   0   59.39    6.90
   4  19   0   57.69    6.50
  -5 -19   0  -29.00   12.60
   5 -19   0    5.40    9.70
  -5 -19   0   -0.80    9.90
   5  19   0    0.70    3.00
  -5  19   0    0.80    3.10
  -5  19   0    2.20    2.40
   5  19   0   -0.30    3.10
   6 -19   0   10.60   11.00
  -6 -19   0   28.20   11.90
  -6  19   0   15.20    3.80
   6  19   0   10.10    3.70
  -6  19   0   17.40    3.30
   6  19   0   17.40    4.00
  -7  19   0   -4.40    3.10
   7  19   0    3.90    3.30
  -7  19   0    0.10    2.40
   7  19   0    4.80    3.10
   8  19   0    1.80    3.00
   8  19   0   -0.70    2.80
  -8  19   0    0.40    2.30
  -8  19   0   -5.30    3.10
   9  19   0   14.20    3.70
  -9  19   0   22.20    4.20
  -9  19   0   24.50    3.60
   9  19   0   19.10    3.90
  10  19   0    7.60    3.20
 -10  19   0    6.30    3.90
 -10  19   0    7.30    2.60
  11  19   0   29.20    4.70
 -11  19   0   33.90    4.30
  12  19   0    0.30    2.10
 -12  19   0    2.70    1.90
 -13  19   0    6.00    1.90
  13  19   0    3.20    2.20
   0 -20   0  357.26   24.30
   0  20   0  356.36   19.00
   0  20   0  366.66   19.50
   0  20   0  369.76   18.70
  -1 -20   0    2.00    9.20
   1 -20   0   10.20    9.10
  -1  20   0    5.40    3.40
   1  20   0    0.30    3.50
   1  20   0    5.30    3.30
  -1  20   0    9.10    3.40
   1  20   0    0.50    3.00
  -1  20   0    0.90    4.10
  -2 -20   0   12.30    9.80
   2 -20   0    5.00    9.00
  -2  20   0   16.00    3.50
  -2  20   0   16.30    5.00
   2  20   0    9.50    3.50
   2  20   0   16.00    4.00
  -2  20   0   17.80    6.70
   2  20   0   17.60    4.10
  -2  20   0    6.30    3.70
  -2  20   0   17.60    3.30
  -3 -20   0   90.29   14.80
   3 -20   0  114.59   16.90
  -3  20   0  117.79    7.80
   3  20   0  134.19    9.30
   3  20   0  111.99    8.80
  -3  20   0  129.19   13.60
  -3  20   0  114.79    9.30
   3  20   0  129.29    9.60
  -3  20   0  122.49    8.60
  -4 -20   0  111.29   17.20
   4 -20   0  103.59   14.70
  -4  20   0   91.19    8.10
  -4  20   0   87.99   15.50
   4  20   0   90.79    8.40
   4  20   0  108.89    8.20
  -4  20   0   90.19    6.90
   5 -20   0    0.70   11.90
  -5 -20   0    0.80   11.90
  -5  20   0    0.00    9.90
   5  20   0    0.50    3.00
  -5  20   0    1.20    3.20
  -5  20   0    3.00    2.20
   5  20   0    1.00    3.20
  -6  20   0    1.00    2.20
   6  20   0    2.40    3.10
   6  20   0   -0.20    2.60
  -6  20   0    4.80    3.20
   7  20   0   78.19    7.50
  -7  20   0   57.09    7.00
   7  20   0   76.79    7.20
  -7  20   0   70.49    6.10
   8  20   0   51.49    6.50
   8  20   0   52.89    6.40
  -8  20   0   44.10    6.10
  -8  20   0   46.50    5.20
  -9  20   0    2.10    2.20
  -9  20   0    2.60    3.20
   9  20   0   -2.30    2.50
   9  20   0   -0.90    2.50
  10  20   0   35.80    5.30
 -10  20   0   37.80    4.40
 -11  20   0    0.30    1.80
  11  20   0    1.00    2.10
 -12  20   0  151.98    8.50
  12  20   0  143.89    8.90
  13  20   0   47.10    4.30
 -13  20   0   56.19    4.10
   0 -21   0    2.30   10.60
   0  21   0   -4.00    3.30
   0  21   0   -1.40    2.90
   0  21   0   -2.10    2.70
   1 -21   0   10.60   11.10
  -1 -21   0   23.50   10.90
   1  21   0   12.40    3.60
   1  21   0   12.80    3.60
  -1  21   0   18.30    3.50
  -1  21   0   19.80    4.30
   1  21   0   14.60    3.80
  -2 -21   0   12.70   12.30
   2 -21   0   -9.20    9.60
  -2  21   0    9.50    3.10
   2  21   0    6.80    3.20
   2  21   0    2.50    3.20
  -2  21   0   -3.10    2.80
   2  21   0    3.60    3.30
   3 -21   0   20.10   10.20
  -3 -21   0   24.70   14.10
  -3  21   0    5.20    7.60
  -3  21   0    8.00    2.70
   3  21   0    6.40    3.50
  -3  21   0    6.30    5.60
   3  21   0   12.90    3.50
  -3  21   0   16.20    4.00
   4  21   0    4.10    3.30
  -4  21   0   10.10    2.50
  -4  21   0    7.20    8.60
   4  21   0    8.30    3.50
  -4  21   0    4.40    3.10
  -5  21   0   14.00    3.80
  -5  21   0   12.10    2.80
   5  21   0   12.00    3.80
  -5  21   0   16.00   10.90
   5  21   0   20.10    4.00
  -6  21   0    6.00    3.30
  -6  21   0   13.30   12.70
   6  21   0   12.00    3.60
  -6  21   0   13.20    2.80
   6  21   0   12.20    3.70
   7  21   0   30.60    4.90
   7  21   0   24.20    4.20
  -7  21   0   30.90    4.30
  -7  21   0   26.80    4.20
   8  21   0    7.90    3.10
   8  21   0   12.20    3.30
  -8  21   0   14.70    2.80
  -8  21   0   17.50    3.50
  -9  21   0   -0.30    1.80
  -9  21   0    2.60    3.10
   9  21   0   -3.20    2.20
   9  21   0    2.90    2.50
  10  21   0   17.70    3.30
 -10  21   0   17.00    2.80
 -11  21   0    3.40    1.70
  11  21   0    0.50    1.90
  12  21   0    3.80    2.00
 -12  21   0    6.80    1.80
   0  22   0    4.40    2.90
   0  22   0   -0.20    3.20
   1  22   0   30.20    4.90
   1  22   0   24.50    4.30
  -1  22   0   24.70    4.50
   2  22   0    1.90    3.00
  -2  22   0   -0.40    2.90
   2  22   0   -0.70    2.90
   3  22   0   47.40    6.30
  -3  22   0   50.39    6.60
   3  22   0   46.90    6.30
   4  22   0   -1.20    2.90
   4  22   0    2.50    2.90
  -4  22   0    3.40    2.30
  -4  22   0    3.90    3.10
  -5  22   0    4.60    3.00
   5  22   0    8.20    3.50
  -5  22   0    1.60    2.10
  -5  22   0    1.50   12.10
   5  22   0    6.50    3.00
  -6  22   0    2.20    2.00
  -6  22   0    2.10    2.80
   6  22   0    8.50    3.20
   6  22   0    2.80    2.70
   7  22   0  104.39    8.10
   7  22   0   89.09    7.60
  -7  22   0   79.49    7.20
  -7  22   0   87.09    6.30
  -8  22   0    2.30    1.90
   8  22   0   -3.00    2.20
  -8  22   0   -0.60    2.90
   8  22   0   -2.40    2.20
  -9  22   0   47.40    6.00
  -9  22   0   53.59    4.60
   9  22   0   47.90    5.40
   9  22   0   64.49    5.90
 -10  22   0  117.39    6.90
  10  22   0  116.19    7.90
  11  22   0    0.30    1.80
 -11  22   0   -0.40    1.30
   0  23   0    0.30    3.30
   0  23   0   -1.10    2.70
  -1  23   0   65.89    6.90
   1  23   0   53.89    6.60
   1  23   0   68.39    7.20
   2  23   0   91.59    7.90
   2  23   0   81.89    7.20
  -2  23   0   68.99    7.30
   3  23   0  110.19    8.90
   3  23   0  110.79    8.40
  -3  23   0  113.89    9.00
  -4  23   0    5.10    3.00
   4  23   0    5.40    2.90
   4  23   0    0.90    2.90
   5  23   0   12.50    3.40
  -5  23   0   18.50    3.80
  -5  23   0   16.40    2.50
   5  23   0   17.50    4.30
  -6  23   0   36.70    5.70
   6  23   0   39.00    5.50
  -6  23   0   39.10    4.10
   6  23   0   47.80    6.10
  -7  23   0    1.00    1.80
   7  23   0   -0.40    2.40
  -7  23   0   -2.30    2.80
   7  23   0    0.90    2.40
  -8  23   0   43.20    4.00
   8  23   0   36.50    4.90
  -8  23   0   40.40    5.50
   8  23   0   46.90    5.30
   9  23   0    0.10    2.00
   9  23   0    1.70    2.20
  -9  23   0   -0.50    1.50
 -10  23   0    7.10    1.70
  10  23   0    6.30    2.30
  11  23   0   32.90    3.60
 -11  23   0   27.70    2.70
   0  24   0   -1.50    3.10
   0  24   0    2.90    2.60
   1  24   0    3.60    3.00
  -1  24   0   10.50    3.20
   1  24   0    6.70    3.20
  -2  24   0   -2.00    2.40
   2  24   0    2.40    2.70
   2  24   0   -3.00    2.50
   3  24   0   22.50    4.20
  -3  24   0   20.30    3.90
   3  24   0   20.80    3.80
  -4  24   0   29.60    5.20
   4  24   0   28.70    4.60
   4  24   0   30.90    5.00
   5  24   0    2.90    2.70
   5  24   0    0.90    2.50
  -5  24   0    1.10    2.50
   6  24   0    0.60    2.50
   6  24   0   -0.20    2.40
  -6  24   0    3.20    2.50
   7  24   0   55.69    5.60
  -7  24   0   48.40    5.40
   7  24   0   47.80    5.60
  -8  24   0   29.20    3.80
   8  24   0   31.40    4.50
   8  24   0   32.00    4.20
  -8  24   0   32.70    3.10
   9  24   0   11.40    2.70
  10  24   0   -2.00    1.50
   0  25   0    0.60    2.50
   1  25   0    4.10    2.90
   1  25   0    3.90    2.70
  -1  25   0    0.70    2.60
   2  25   0   58.29    5.90
  -2  25   0   64.09    6.40
   2  25   0   58.59    6.30
   3  25   0    1.60    2.50
  -3  25   0   -2.70    2.40
   3  25   0    2.30    2.60
  -4  25   0    9.00    2.90
   4  25   0   13.40    3.20
   4  25   0   12.40    3.10
   5  25   0   11.90    3.00
  -5  25   0    8.70    2.80
   5  25   0   10.00    2.90
   6  25   0   -3.40    1.80
  -6  25   0   -2.50    2.40
   6  25   0   -0.20    2.20
   7  25   0   20.40    3.30
   7  25   0   24.10    3.80
  -7  25   0   21.70    3.30
   8  25   0   -0.30    1.80
   8  25   0    3.70    2.10
   9  25   0   22.50    3.70
   0  26   0    1.00    2.30
  -1  26   0   12.60    3.10
   1  26   0   11.70    3.00
   2  26   0   40.50    5.20
  -2  26   0   38.70    5.10
   2  26   0   36.40    5.10
   3  26   0   35.90    4.70
   3  26   0   34.50    5.00
  -3  26   0   40.60    4.90
   4  26   0   49.20    5.70
   4  26   0   61.99    5.40
  -4  26   0   56.69    5.40
   5  26   0   78.19    6.00
  -5  26   0   79.49    6.10
   5  26   0   64.99    6.00
   6  26   0   78.19    5.90
   6  26   0   77.99    5.90
  -6  26   0   65.29    5.50
   7  26   0    2.70    2.00
   7  26   0    2.40    1.80
  -7  26   0   -0.70    2.50
   8  26   0   10.00    2.30
   0  27   0   -0.10    2.00
  -1  27   0    2.30    2.20
   1  27   0    4.20    2.20
   2  27   0    5.60    2.40
   2  27   0   11.20    3.00
  -2  27   0    9.30    2.50
   3  27   0    9.70    2.60
  -3  27   0    5.70    2.30
   3  27   0   13.20    2.90
   4  27   0    0.60    2.00
   4  27   0    0.60    2.20
  -4  27   0   -2.70    1.90
   5  27   0   11.20    2.60
  -5  27   0    8.70    2.30
  -6  27   0    4.10    2.40
   6  27   0    2.90    2.10
   6  27   0    5.30    2.00
   0  28   0    5.20    2.30
   1  28   0   39.00    4.30
  -1  28   0   37.80    4.30
   2  28   0   24.40    3.70
  -2  28   0   29.50    3.80
   3  28   0    3.40    2.70
   3  28   0    3.90    2.00
  -3  28   0    2.30    1.90
   4  28   0   27.20    3.80
  -4  28   0   23.90    3.50
   4  28   0   26.30    3.40
   5  28   0   18.30    2.50
  -5  28   0   14.30    2.40
   5  28   0   17.30    2.60
   0  29   0    2.20    1.60
  -1  29   0   18.40    3.00
   1  29   0   14.10    2.50
  -2  29   0   14.80    2.30
  16   0  -1   -0.90    1.70
  15   0  -1   26.00    4.20
  14   0  -1   32.00    4.70
  13   0  -1   -7.60   10.00
  13   0  -1    0.50    2.30
  12   0  -1   13.70    3.50
  12   0  -1   16.00    8.30
  11   0  -1    2.30    5.40
  11   0  -1   -4.40    2.60
  10   0  -1   34.70    6.20
   9   0  -1   23.80    4.90
   8   0  -1  223.88   13.20
   7   0  -1  958.90   44.10
  -7   0   1  990.50   43.10
  -6   0   1  330.37   16.30
   6   0  -1  360.26   17.30
   6   0  -1  353.06   19.00
   5   0  -1  897.11   38.80
  -5   0   1  847.32   38.20
   5   0  -1  874.11   40.30
   4   0  -1    6.30    1.80
  -4   0   1    7.70    1.70
   4   0  -1   15.30    3.30
  -4   0   1    3.60    1.80
   3   0  -1    2.90    2.10
  -3   0   1    2.20    1.40
   3   0  -1    1.90    1.20
  -3   0   1    3.40    1.20
  -2   0   1 2613.54  119.69
   2   0  -1 2898.61  119.59
   2   0  -1 2925.01  120.29
  -2   0   1 2832.32  119.49
   1   0  -1   14.10    1.10
   1   0  -1   15.40    1.70
  -1   0   1   13.10    1.10
  -1   0   1   13.20    1.10
   1   0   1   14.70    1.10
   1   0   1   12.90    0.70
  -2   0  -1 2889.81  119.39
   2   0   1 2756.82  119.79
  -3   0  -1    4.10    1.00
   3   0   1    4.10    1.40
   4   0   1    4.10    1.70
  -4   0  -1    7.50    1.40
   5   0   1  873.31   38.80
   6   0   1  330.77   16.50
   7   0   1  998.70   45.20
   8   0   1  226.88   13.50
   9   0   1   12.30    4.50
  10   0   1   34.40    6.80
  11   0   1    1.30    5.50
  11   0   1   -0.30    2.50
  12   0   1   12.70    3.40
  12   0   1   15.60    8.30
  13   0   1    2.20   10.30
  13   0   1   -0.50    2.30
  14   0   1   30.80    4.80
  15   0   1   24.00    4.20
  16  -1  -1   35.50    4.30
  16   1  -1   33.60    4.10
  15  -1  -1   92.39    7.00
  15   1  -1   86.39    6.80
  14  -1  -1   75.79    6.70
  14   1  -1   81.69    6.60
  13  -1  -1   25.50   10.20
  13  -1  -1   38.80    5.20
  13   1  -1   25.80   11.10
  13   1  -1   41.00    5.20
  12  -1  -1   54.39    5.70
  12  -1  -1   55.39    9.60
  12   1  -1   35.60    9.30
  12   1  -1   48.20    5.60
  11  -1  -1   82.49   10.50
  11  -1  -1   62.09    6.30
  11   1  -1   59.49    6.10
  11   1  -1   77.29    9.50
  10  -1  -1   70.79    9.10
  10   1  -1   68.89    8.20
   9  -1  -1   70.79    7.80
   9   1  -1   64.19    7.50
  -8  -1   1  434.26   21.40
   8  -1  -1  457.85   23.00
   8   1  -1  477.85   23.00
  -7  -1   1   13.40    2.70
   7  -1  -1   10.40    3.40
   7   1  -1    8.20    2.80
  -6  -1   1 1061.29   48.10
   6  -1  -1 1118.39   49.00
   6   1  -1 1139.19   48.90
  -6   1   1 1035.50   48.10
   6   1  -1 1164.08   50.79
   5  -1  -1   40.00    3.80
  -5  -1   1   37.40    3.40
   5  -1  -1   37.20    5.80
  -5  -1   1   41.80    4.10
  -5   1   1   37.20    3.40
   5   1  -1   37.50    3.80
   5   1  -1   35.70    5.50
  -4  -1   1  190.68   10.00
   4  -1  -1  203.98    9.80
  -4  -1   1  189.38    9.30
   4  -1  -1  207.88   11.40
   4   1  -1  183.68   10.60
  -4   1   1  184.18    9.30
   4   1  -1  181.18    9.60
   3  -1  -1    3.80    1.40
   3  -1  -1    8.40    2.60
  -3  -1   1    3.70    1.60
  -3  -1   1    4.30    1.20
   3   1  -1    2.10    1.90
   3   1  -1    1.50    1.20
  -2  -1   1  250.97   12.00
   2  -1  -1  266.47   11.90
   2  -1  -1  267.07   12.80
  -2  -1   1  254.27   11.70
   2   1  -1  263.37   12.40
  -2   1   1  255.47   11.80
   2   1  -1  272.07   11.70
   1  -1  -1 2693.93  116.19
   1  -1  -1 2691.53  115.79
  -1  -1   1 2745.13  115.79
   1   1  -1 2776.72  115.59
  -1   1   1 2719.03  115.79
   1   1  -1 2774.92  116.09
   0   1  -1   34.20    1.70
   0   1   1   37.30    1.80
  -1  -1  -1 2744.23  115.69
  -1  -1  -1 2688.83  115.29
   1  -1   1 2803.42  115.69
   1   1   1 2689.03  115.59
  -2  -1  -1  264.47   11.40
  -2  -1  -1  262.27   12.00
   2  -1   1  275.87   12.00
   2   1   1  243.28   12.20
   2   1   1  265.67   11.80
  -3  -1  -1    2.10    0.90
  -3  -1  -1    1.00    1.30
   3  -1   1    0.80    1.40
   3   1   1    5.80    2.00
   3   1   1    4.90    1.50
  -4  -1  -1  175.18    9.50
  -4  -1  -1  175.48    8.50
   4  -1   1  182.38    9.40
   4   1   1  197.28    9.40
   5  -1   1   38.30    3.80
  -5  -1  -1   32.70    2.80
   5   1   1   40.80    3.70
  -6  -1  -1 1059.59   47.20
   6  -1   1 1082.89   48.60
   6   1   1 1135.99   48.60
   7  -1   1    9.30    3.30
   7   1   1   12.80    3.10
   8  -1   1  489.05   24.20
   8   1   1  471.65   24.00
   9  -1   1   59.29    7.70
   9   1   1   70.29    7.90
  10  -1   1   54.89    7.90
  10   1   1   63.49    9.10
  11  -1   1   78.39   11.00
  11  -1   1   62.19    6.00
  11   1   1   58.79    5.80
  11   1   1   72.49    9.60
  12  -1   1   46.30    5.80
  12  -1   1   52.79    9.60
  12   1   1   54.59   10.80
  12   1   1   48.50    5.60
  13  -1   1   19.30   10.10
  13  -1   1   45.70    5.40
  13   1   1   46.10    5.20
  13   1   1   54.29   12.20
  14  -1   1   67.99    6.60
  14   1   1   90.29    6.90
  15  -1   1   93.29    6.90
  15   1   1   89.49    6.80
  16  -2  -1    7.90    2.30
  16   2  -1    6.30    2.10
  15  -2  -1    7.00    2.50
  15   2  -1    6.90    2.50
  14  -2  -1   27.40    4.30
  14   2  -1   37.90    4.60
  13  -2  -1  105.09   15.70
  13  -2  -1   76.39    6.80
  13   2  -1   79.59    6.50
  13   2  -1   71.29   13.30
 -13   2   1   66.69    9.20
  12  -2  -1   70.89    6.70
  12  -2  -1   74.69   11.60
 -12   2   1   61.79    9.70
  12   2  -1   80.09    6.50
  12   2  -1   73.69   11.30
  11  -2  -1  145.39   12.90
  11  -2  -1  132.29    9.00
  11   2  -1  125.99   13.00
  11   2  -1  128.09    8.60
  10  -2  -1  179.38   12.60
  10   2  -1  160.98   12.90
   9  -2  -1   77.69    7.60
   9   2  -1   63.39    6.90
   8  -2  -1  428.46   21.90
  -8  -2   1  422.16   20.40
   8   2  -1  445.26   21.80
  -7  -2   1 1518.75   69.09
   7  -2  -1 1558.64   70.29
   7   2  -1 1668.33   70.19
   7   2  -1 1639.04   72.09
  -6  -2   1   93.29    6.10
  -6  -2   1   98.49    7.10
   6  -2  -1  107.29    7.00
   6   2  -1  105.89    8.20
   6   2  -1   93.79    6.60
  -5  -2   1  120.39    7.00
  -5  -2   1  121.49    7.80
   5  -2  -1  126.09    7.60
   5   2  -1  143.09    7.60
   5   2  -1  147.89    9.10
   4  -2  -1  491.35   22.60
  -4  -2   1  475.85   22.10
   4  -2  -1  482.75   24.10
  -4  -2   1  478.35   22.80
   4   2  -1  496.05   23.30
  -4   2   1  514.85   22.30
   4   2  -1  520.75   22.30
   3  -2  -1   87.99    6.70
  -3  -2   1   76.89    5.20
  -3  -2   1   82.29    4.80
   3   2  -1   93.19    5.90
   3   2  -1   96.79    4.90
  -3   2   1   94.09    5.00
   2  -2  -1   84.69    4.50
  -2  -2   1   81.09    4.40
   2  -2  -1   92.59    5.70
   2   2  -1   83.79    5.00
  -2   2   1   81.59    4.50
   2   2  -1   80.09    4.20
  -1  -2   1  387.46   17.70
   1  -2  -1  391.26   17.70
   1   2  -1  415.46   18.10
   1   2  -1  429.16   17.40
   0  -2   1 3221.78  131.29
   0  -2   1 3022.30  131.69
   0  -2  -1 2899.71  131.49
   0   2  -1 3190.98  131.29
   0   2   1 3211.38  131.49
   1  -2   1  429.36   18.40
   1   2   1  415.56   18.10
  -2  -2  -1   74.09    4.40
   2  -2   1   79.79    4.30
  -2  -2  -1   82.59    3.90
   2   2   1   83.19    4.20
  -3  -2  -1   86.29    5.10
  -3  -2  -1   95.89    4.40
   3  -2   1   87.99    5.10
   3   2   1   78.19    4.70
   3   2   1   76.59    5.40
  -4  -2  -1  473.05   21.70
   4  -2   1  510.45   22.70
  -4  -2  -1  516.95   22.90
   4   2   1  491.85   22.40
   4   2   1  486.55   23.20
  -5  -2  -1  122.99    6.50
   5  -2   1  135.39    7.70
  -5  -2  -1  128.19    7.90
   5   2   1  131.89    7.40
   6  -2   1   94.39    6.80
  -6  -2  -1   95.59    5.60
  -6  -2  -1   99.59    7.10
   6   2   1  104.89    6.70
  -7  -2  -1 1516.95   68.19
   7  -2   1 1639.74   70.29
   7   2   1 1608.94   69.99
   8  -2   1  462.85   23.10
   8   2   1  449.16   22.90
   9  -2   1   51.09    6.80
   9   2   1   62.49    7.10
  10  -2   1  183.68   13.80
  10   2   1  186.48   13.00
  11  -2   1  129.09    9.10
  11  -2   1  145.89   13.40
  11   2   1  130.99    8.70
  11   2   1  126.19   12.40
  12  -2   1   82.69    7.10
  12  -2   1   86.09   12.10
  12   2   1   89.59   13.80
  12   2   1   84.99    6.90
  13  -2   1   54.49   11.60
  13  -2   1   87.29    7.20
  13   2   1   92.09    6.80
  13   2   1   70.49   14.00
  14  -2   1   27.20    4.70
  14   2   1   34.20    4.70
  15  -2   1    6.50    2.40
  15   2   1    4.40    2.20
 -16   3   1   32.80    5.20
  16   3  -1   48.70    4.30
  15  -3  -1    9.10    2.60
  15   3  -1    3.80    2.20
 -15   3   1    2.90    4.00
  14  -3  -1    8.10    3.10
  14   3  -1    8.30    2.70
 -14   3   1    3.90    4.00
  13  -3  -1   84.49    6.90
  13  -3  -1   65.19   12.10
  13   3  -1   68.89   12.90
 -13   3   1   56.39    8.00
  13   3  -1   74.19    6.40
  12  -3  -1   54.29    6.40
  12  -3  -1   57.59   10.70
 -12   3   1   45.80    8.00
  12   3  -1   56.39    5.70
  12   3  -1   63.99   10.90
  11  -3  -1   29.20    7.40
  11  -3  -1   25.10    4.00
  11   3  -1   33.50    7.80
  11   3  -1   33.00    4.80
  10  -3  -1   29.40    6.20
  10   3  -1   42.90    7.00
  -9  -3   1   26.20    4.60
   9  -3  -1   37.30    6.00
   9   3  -1   25.50    5.30
  -8  -3   1  216.68   11.90
   8  -3  -1  216.48   13.10
   8   3  -1  235.08   13.10
  -7  -3   1  133.19    7.90
  -7  -3   1  127.29    9.20
   7  -3  -1  124.79    8.70
   7   3  -1  133.69   10.70
   7   3  -1  149.79    8.80
  -6  -3   1  262.97   14.00
  -6  -3   1  257.07   12.60
   6  -3  -1  262.27   13.60
   6   3  -1  247.88   13.00
   6   3  -1  244.28   14.60
  -5  -3   1   71.19    5.80
  -5  -3   1   81.39    5.30
   5  -3  -1   80.19    5.80
   5   3  -1  100.79    6.90
   5   3  -1   89.19    5.50
   4  -3  -1  578.34   26.00
  -4  -3   1  551.74   26.20
  -4  -3   1  529.35   25.50
   4   3  -1  620.64   26.70
   4   3  -1  590.64   25.50
   3  -3  -1  670.33   28.90
  -3  -3   1  683.83   28.70
  -3  -3   1  646.84   29.10
   3   3  -1  627.24   28.30
   3   3  -1  623.54   29.20
  -2  -3   1    4.00    1.30
   2  -3  -1    4.70    1.20
   2   3  -1    2.40    1.50
   2   3  -1    4.10    0.90
   1  -3  -1  463.25   20.90
  -1  -3   1  456.75   21.00
  -1  -3   1  492.55   20.40
   1   3  -1  512.05   20.40
   1   3  -1  465.65   21.20
   0  -3   1  615.94   25.70
   0  -3  -1  594.04   26.00
   1  -3   1  506.25   20.50
   1   3   1  434.26   20.10
   2  -3   1    2.70    1.20
  -2  -3  -1    2.50    0.90
   2   3   1    4.00    1.10
   2   3   1    2.80    1.20
  -3  -3  -1  599.84   27.80
  -3  -3  -1  590.54   28.40
   3  -3   1  624.14   28.40
   3   3   1  692.73   28.20
   3   3   1  691.23   28.60
  -4  -3  -1  606.24   26.20
  -4  -3  -1  531.85   24.90
   4  -3   1  622.64   26.10
   4   3   1  530.05   26.10
   4   3   1  565.84   25.50
  -5  -3  -1   89.49    6.30
   5  -3   1   88.69    5.90
  -5  -3  -1   86.29    4.90
   5   3   1   80.69    5.70
   5   3   1   81.99    6.70
  -6  -3  -1  231.18   13.10
  -6  -3  -1  227.48   11.50
   6  -3   1  249.58   13.20
   6   3   1  262.07   12.80
   7  -3   1  144.89    9.30
  -7  -3  -1  141.69    9.40
  -7  -3  -1  122.79    7.40
   7   3   1  141.99    9.00
   8  -3   1  224.58   13.60
   8   3   1  239.18   13.60
   9  -3   1   25.60    5.20
   9   3   1   37.20    5.90
  10  -3   1   41.50    7.30
  10   3   1   41.80    7.20
  11  -3   1   29.30    6.90
  11  -3   1   22.90    4.00
  11   3   1   34.80    8.40
  11   3   1   29.70    4.70
  12  -3   1   54.99    9.80
  12  -3   1   67.09    6.30
  12   3   1   44.60   10.20
 -12   3  -1   58.09    8.60
  12   3   1   59.69    6.00
  13  -3   1   75.59    6.90
  13  -3   1   92.59   14.40
 -13   3  -1   62.59    8.80
  13   3   1   67.69   13.40
  13   3   1   84.69    6.50
  14  -3   1    4.40    2.70
 -14   3  -1    3.10    4.90
  14   3   1   10.80    2.90
  15  -3   1    4.80    2.30
  15   3   1    7.30    2.20
 -17   4   1   33.50    4.90
 -16   4   1   12.80    3.90
  16   4  -1   12.30    2.30
  15  -4  -1   17.50    3.40
  15   4  -1   23.30    3.70
 -15   4   1   18.80    4.30
  14  -4  -1   30.20    5.10
  14   4  -1   40.30    4.70
 -14   4   1   23.10    4.80
  13  -4  -1   57.59   11.90
  13  -4  -1   76.09    6.70
  13   4  -1   60.19   14.40
 -13   4   1   59.29    8.00
  13   4  -1   72.69    6.20
  12  -4  -1    6.30    7.70
  12  -4  -1   12.90    3.60
  12   4  -1   19.40    9.60
 -12   4   1    6.80    4.40
  12   4  -1   11.50    2.90
  11  -4  -1  208.58   15.90
  11  -4  -1  229.48   12.40
  11   4  -1  194.58   11.50
  11   4  -1  189.08   16.00
  10  -4  -1   50.59    7.80
  10   4  -1   35.00    6.90
   9  -4  -1  118.09   10.00
   9   4  -1  124.39    9.80
   8  -4  -1  181.38   11.70
  -8  -4   1  190.58   12.60
  -8  -4   1  187.58   10.60
   8   4  -1  190.48   11.60
  -7  -4   1  176.78   11.40
  -7  -4   1  178.28   10.00
   7  -4  -1  192.98   11.10
   7   4  -1  166.98   12.10
   7   4  -1  196.78   10.80
  -6  -4   1   53.99    5.50
   6  -4  -1   59.19    5.40
  -6  -4   1   64.29    5.00
   6   4  -1   76.89    5.40
  -5  -4   1  801.12   38.10
  -5  -4   1  896.21   39.30
   5  -4  -1  879.81   38.90
   5   4  -1  879.91   38.20
   5   4  -1  871.41   39.40
  -4  -4   1  263.67   13.30
   4  -4  -1  292.87   13.80
  -4  -4   1  295.27   14.20
   4   4  -1  267.07   13.00
   4   4  -1  280.17   14.10
  -3  -4   1    2.70    1.50
   3  -4  -1    1.60    1.60
   3   4  -1    1.10    1.10
   3   4  -1    3.40    1.80
   2  -4  -1   85.49    4.60
  -2  -4   1   87.39    4.60
   2   4  -1   70.19    4.70
   2   4  -1   64.89    3.70
  -1  -4   1    9.40    1.60
   1   4  -1   10.40    1.90
  -1   4   1   11.40    2.30
   0  -4  -1  207.68    9.60
   0  -4   1  219.08    9.30
   1  -4   1   10.90    1.50
   1   4   1   11.70    1.40
  -2  -4  -1   67.79    3.80
   2  -4   1   68.59    4.20
  -3  -4  -1    1.70    1.30
  -3  -4  -1    2.50    1.80
   3  -4   1    1.20    2.00
   3   4   1    3.00    1.60
   3   4   1    0.90    1.30
  -4  -4  -1  253.27   12.60
  -4  -4  -1  253.57   13.50
   4  -4   1  272.87   13.40
   4   4   1  293.37   13.70
   4   4   1  290.37   13.10
   5  -4   1  896.01   38.70
  -5  -4  -1  872.11   38.90
  -5  -4  -1  772.42   37.30
   5   4   1  871.51   39.00
   5   4   1  888.71   38.20
   6  -4   1   81.39    6.30
  -6  -4  -1   76.69    6.30
  -6  -4  -1   77.19    4.90
   6   4   1   61.39    5.50
  -7  -4  -1  164.18    9.30
  -7  -4  -1  178.98   11.40
   7  -4   1  192.08   11.20
   7   4   1  201.18   11.00
   8  -4   1  188.58   12.00
   8   4   1  195.28   11.70
   9  -4   1  113.19    9.90
   9   4   1  111.99    9.10
  10  -4   1   49.80    7.80
  10   4   1   51.29    7.90
  11  -4   1  207.98   12.30
  11  -4   1  203.08   16.00
  11   4   1  196.98   11.30
  11   4   1  199.18   16.30
  12  -4   1   12.60    8.20
  12  -4   1   18.00    3.70
  12   4   1   12.30    3.00
  12   4   1   10.30    9.20
  12   4   1    3.20    4.70
 -12   4  -1   14.50    4.50
  13  -4   1   70.39   12.80
  13  -4   1   82.79    6.90
  13   4   1   63.49    8.40
  13   4   1   74.99    6.10
 -13   4  -1   53.69    8.10
  14  -4   1   38.60    5.20
 -14   4  -1   28.10    5.50
  14   4   1   34.00    4.60
 -15   4  -1   11.00    3.90
  15   4   1   21.20    3.60
 -16   4  -1    9.40    4.10
 -17   5   1    3.90    3.60
 -16   5   1    8.40    3.90
  15  -5  -1   41.30    5.20
  15   5  -1   46.90    4.60
 -15   5   1   43.10    6.50
  14  -5  -1   14.20    3.50
 -14   5   1   12.20    4.00
  14   5  -1    8.80    2.60
  13  -5  -1   83.19    7.40
  13  -5  -1   81.59   17.80
  13   5  -1   78.69    6.40
 -13   5   1   79.29    8.00
  12  -5  -1   22.50    8.70
  12  -5  -1   15.00    3.60
  12   5  -1   20.10   10.60
 -12   5   1   24.60    4.40
  12   5  -1   15.60    3.10
  12   5  -1   14.10    5.00
  11  -5  -1   46.20    6.00
  11  -5  -1   55.89    8.80
 -11   5   1   44.00    7.10
  11   5  -1   50.39    9.10
  11   5  -1   38.30    5.00
  10  -5  -1  277.27   17.20
  10   5  -1  279.77   17.60
   9  -5  -1   98.79    8.80
   9   5  -1   85.99    8.90
  -8  -5   1   51.59    5.70
   8  -5  -1   41.00    5.70
  -8  -5   1   48.20    6.70
   8   5  -1   32.30    5.30
  -7  -5   1  171.68    9.70
   7  -5  -1  178.98   10.80
  -7  -5   1  173.08   11.20
   7   5  -1  166.98   10.20
   7   5  -1  171.08   11.70
   6  -5  -1  178.48   10.30
  -6  -5   1  173.28   10.50
  -6  -5   1  167.78    9.30
   6   5  -1  158.78    9.50
   6   5  -1  172.68   10.90
  -5  -5   1  988.20   44.70
  -5  -5   1  949.90   43.60
   5  -5  -1 1022.50   44.30
   5   5  -1  991.20   43.40
   5   5  -1 1000.90   44.60
   4  -5  -1 1108.99   48.90
  -4  -5   1 1110.69   49.30
  -4  -5   1 1093.59   48.60
   4   5  -1 1132.59   48.10
   4   5  -1 1109.69   49.10
  -3  -5   1  171.08    8.30
   3  -5  -1  163.98    8.30
   3   5  -1  143.19    8.40
   3   5  -1  143.09    7.40
   2  -5  -1  261.47   12.30
  -2  -5   1  260.87   12.30
   2   5  -1  257.07   12.50
   1  -5  -1  161.98    7.80
   0  -5   1   10.80    1.20
   0  -5  -1   12.00    1.40
   1  -5   1  194.98    8.20
   1   5   1  151.88    8.00
   2  -5   1  275.47   12.40
  -2  -5  -1  255.77   12.10
   2   5   1  255.67   11.90
   3  -5   1  156.48    8.20
  -3  -5  -1  152.48    7.80
   3   5   1  153.78    7.90
  -4  -5  -1 1070.49   48.50
   4  -5   1 1159.18   49.20
  -4  -5  -1 1103.09   49.50
   4   5   1 1149.48   48.70
   4   5   1 1108.39   49.00
  -5  -5  -1  904.61   42.80
   5  -5   1  971.70   42.60
  -5  -5  -1  915.11   41.60
   5   5   1  985.50   42.10
   5   5   1  981.20   42.80
   6  -5   1  156.38    9.70
  -6  -5  -1  143.69    8.40
  -6  -5  -1  167.88   10.10
   6   5   1  182.88    9.50
  -7  -5  -1  150.38    8.80
   7  -5   1  158.88   10.30
  -7  -5  -1  177.18   11.00
   7   5   1  180.18   10.20
   8  -5   1   39.80    6.10
  -8  -5  -1   33.50    5.50
  -8  -5  -1   30.20    5.80
   8   5   1   42.90    5.40
   9  -5   1   67.39    7.70
   9   5   1   81.79    8.50
  10  -5   1  277.37   17.90
  10   5   1  282.17   18.00
  11  -5   1   51.69    6.20
  11  -5   1   40.40    7.50
  11   5   1   30.10    4.90
  11   5   1   42.40    9.00
  12  -5   1   24.90    9.00
  12  -5   1   20.70    4.20
  12   5   1   16.90    4.90
 -12   5  -1   27.40    4.80
  12   5   1   11.60    3.00
  13  -5   1   61.09    6.70
  13  -5   1   48.40   19.80
 -13   5  -1   76.99    8.00
  13   5   1   74.89    6.00
  13   5   1   66.09    8.30
  14  -5   1   10.90    3.30
 -14   5  -1    9.70    4.30
  14   5   1   18.00    3.00
  14   5   1    9.10    4.50
 -15   5  -1   46.60    6.90
  15   5   1   38.20    4.20
 -16   5  -1   13.30    3.90
 -17   5  -1    5.90    3.90
 -17   6   1    4.10    3.10
 -16   6   1   14.70    3.40
  15  -6  -1   14.80    3.30
 -15   6   1   16.00    3.80
  14  -6  -1   23.10    4.00
  14   6  -1   30.10    4.00
 -14   6   1   17.70    3.80
  13  -6  -1   28.50    4.90
  13   6  -1   28.70    4.30
 -13   6   1   28.80    4.50
  13   6  -1   19.90    4.80
  12  -6  -1   50.99    9.80
  12  -6  -1   63.29    7.00
 -12   6   1   84.69    7.40
  12   6  -1   70.79    6.10
  11  -6  -1   38.20    7.30
  11  -6  -1   23.90    4.40
  11   6  -1   32.90    5.20
  11   6  -1   22.30    9.10
 -11   6   1   42.50    6.20
  11   6  -1   25.40    4.50
  10  -6  -1    6.80    4.90
  10   6  -1    7.70    6.30
   9  -6  -1   11.00    4.40
  -9  -6   1   16.70    5.70
   9   6  -1   22.00    5.50
  -8  -6   1   17.40    4.40
   8  -6  -1   22.80    4.60
  -8  -6   1   27.00    5.20
   8   6  -1   32.30    4.90
   7  -6  -1   33.00    5.60
  -7  -6   1   42.20    5.50
  -7  -6   1   30.90    5.00
   7   6  -1   32.70    5.10
   7   6  -1   46.40    6.40
  -6  -6   1  372.96   19.50
  -6  -6   1  344.87   18.00
   6  -6  -1  380.36   19.00
   6   6  -1  394.96   19.50
   6   6  -1  385.46   18.00
   5  -6  -1  536.45   24.90
  -5  -6   1  511.65   25.40
  -5  -6   1  517.15   24.40
   5   6  -1  530.65   23.90
   5   6  -1  546.45   25.20
  -4  -6   1   17.40    2.80
   4  -6  -1   12.80    2.60
   4   6  -1   12.20    2.10
   4   6  -1   15.70    2.80
  -3  -6   1  313.47   15.70
   3  -6  -1  338.87   15.70
   3   6  -1  337.97   15.90
   2  -6  -1  293.67   13.30
  -2  -6   1  286.07   13.50
   2   6  -1  263.87   13.50
  -1  -6   1   92.49    5.40
   1  -6  -1   99.09    5.00
   1   6  -1   88.79    5.70
  -1   6   1   76.69    6.30
   0  -6   1  317.97   13.60
   0  -6  -1  301.07   13.80
   1  -6   1   80.79    4.70
  -1  -6  -1   85.39    4.40
   1   6   1   96.19    4.90
  -2  -6  -1  281.17   13.50
   2  -6   1  294.27   13.50
   2   6   1  288.17   13.00
   3  -6   1  346.67   15.60
  -3  -6  -1  314.67   15.30
   3   6   1  321.67   15.00
  -4  -6  -1   14.90    3.10
  -4  -6  -1   13.50    2.40
   4  -6   1   12.40    2.70
   4   6   1   13.20    2.50
  -5  -6  -1  530.15   24.30
   5  -6   1  561.84   25.20
  -5  -6  -1  551.44   25.60
   5   6   1  507.15   24.30
   5   6   1  521.65   24.90
  -6  -6  -1  360.56   17.70
   6  -6   1  396.66   19.10
  -6  -6  -1  394.46   19.60
   6   6   1  363.36   18.30
  -7  -6  -1   38.10    5.30
  -7  -6  -1   29.60    4.50
   7  -6   1   41.90    5.10
   7   6   1   32.50    5.30
  -8  -6  -1   29.20    5.40
   8  -6   1   24.50    4.70
   8   6   1   17.60    4.60
   9  -6   1   18.00    5.40
   9   6   1   14.90    5.30
  10  -6   1    3.80    4.90
  10   6   1    4.60    6.20
  11  -6   1   31.30    8.10
  11  -6   1   35.90    5.30
  11   6   1   26.20    5.10
  11   6   1   31.00    4.60
 -11   6  -1   20.20    4.80
  12  -6   1   92.79   12.90
  12  -6   1   79.59    7.40
  12   6   1   63.69    5.90
 -12   6  -1   69.89    7.50
  12   6   1   66.89    8.00
  13  -6   1   33.50    4.90
  13   6   1   27.00    4.10
  13   6   1   24.60    4.70
 -13   6  -1   36.40    6.30
  14  -6   1   28.70    4.90
  14   6   1   25.40    4.60
  14   6   1   26.20    4.10
 -14   6  -1   18.90    4.40
 -15   6  -1   15.10    4.10
 -16   6  -1   15.60    3.70
 -17   6  -1   12.50    3.60
 -17   7   1   41.80    5.20
 -16   7   1    8.70    3.10
 -15   7   1    6.30    2.90
  15   7  -1    8.30    2.00
  14  -7  -1   19.10    3.80
 -14   7   1   21.00    4.30
  14   7  -1   26.80    3.90
  13  -7  -1    7.00    3.50
 -13   7   1   10.50    3.50
  13   7  -1    7.50    2.50
  13   7  -1    5.20    4.30
  12  -7  -1   -5.50    8.10
  12  -7  -1    9.30    3.80
 -12   7   1    4.90    3.40
  12   7  -1    6.40    3.80
  12   7  -1    5.30    2.50
  11  -7  -1   13.00    6.40
  11  -7  -1   17.20    4.30
  11   7  -1   13.30    4.50
 -11   7   1   15.70    4.10
  11   7  -1   15.40    3.00
  10  -7  -1  123.89   11.30
  10   7  -1  144.69   13.30
  -9  -7   1   28.80    6.20
   9  -7  -1   25.60    5.60
   9   7  -1   34.60    6.20
   8  -7  -1  103.69    8.70
  -8  -7   1  103.59    8.40
  -8  -7   1  108.29    9.80
   8   7  -1  110.69    8.90
  -7  -7   1  119.59    9.50
   7  -7  -1  108.09    8.50
  -7  -7   1  122.29    8.30
   7   7  -1  126.69    9.40
   7   7  -1  112.39    8.20
  -6  -7   1  330.77   17.40
  -6  -7   1  334.37   18.60
   6  -7  -1  333.37   17.90
   6   7  -1  392.76   18.60
   6   7  -1  370.26   17.20
  -5  -7   1  585.84   28.50
   5  -7  -1  589.64   27.90
  -5  -7   1  589.94   27.60
   5   7  -1  615.84   28.00
   5   7  -1  597.34   26.80
   4  -7  -1 1086.09   49.20
  -4  -7   1 1123.39   49.30
   4   7  -1 1133.09   49.30
  -3  -7   1 1480.25   64.59
   3  -7  -1 1533.65   64.59
   3   7  -1 1441.86   64.49
  -2  -7   1  139.59    7.80
   2  -7  -1  148.09    7.60
   2   7  -1  141.49    8.00
  -2   7   1  139.69   10.10
   1  -7  -1  373.46   17.10
  -1  -7   1  369.76   17.60
   1   7  -1  381.16   17.90
  -1   7   1  386.86   18.20
   0  -7  -1  699.93   30.40
   0  -7   1  703.33   30.10
   1  -7   1  420.16   17.60
  -1  -7  -1  402.26   17.30
   1   7   1  352.86   17.60
  -2  -7  -1  156.38    7.90
   2  -7   1  147.09    7.70
   2   7   1  134.69    7.10
  -3  -7  -1 1462.95   63.09
   3  -7   1 1498.95   63.19
   3   7   1 1404.86   62.49
   4  -7   1 1125.09   48.50
  -4  -7  -1 1082.39   48.10
   4   7   1 1082.79   47.90
   5  -7   1  596.44   28.30
  -5  -7  -1  636.94   29.00
  -5  -7  -1  582.34   27.60
   5   7   1  611.94   27.90
  -6  -7  -1  373.56   19.10
  -6  -7  -1  341.17   17.40
   6  -7   1  374.16   18.60
   7  -7   1  113.29    8.50
  -7  -7  -1  129.79    9.50
  -7  -7  -1  103.99    7.60
  -8  -7  -1  114.49    9.70
   8  -7   1  121.99    9.90
  -9  -7  -1   16.60    5.50
   9  -7   1   14.80    5.40
  10  -7   1  128.39   11.70
  11  -7   1    8.40    7.10
  11  -7   1   10.90    4.00
  11   7   1   13.50    3.00
 -11   7  -1   10.90    3.70
  11   7   1   17.10    4.30
  12  -7   1   12.00    9.80
  12  -7   1    4.30    3.40
 -12   7  -1    3.30    3.50
  12   7   1    2.70    2.30
  12   7   1    3.50    3.60
  13  -7   1    5.80    3.10
  13   7   1    8.10    3.70
 -13   7  -1   11.00    3.80
  13   7   1    4.10    2.20
  14   7   1   22.00    3.60
 -14   7  -1   28.30    4.50
  14   7   1   21.80    4.30
  15   7   1    0.80    3.80
 -15   7  -1   -0.20    3.00
 -16   7  -1   12.80    3.20
 -17   7  -1   40.40    5.40
 -17   8   1   45.40    4.80
 -16   8   1   61.89    5.90
 -15   8   1   18.20    3.50
  14  -8  -1   22.60    3.90
  14   8  -1   23.60    3.70
  14   8  -1   25.70    4.50
 -14   8   1   17.90    3.80
  13  -8  -1   12.20    3.70
 -13   8   1    8.70    3.30
  13   8  -1   12.50    2.60
  13   8  -1   10.20    4.10
  12  -8  -1  250.77   20.60
  12  -8  -1  264.37   15.20
 -12   8   1  245.68   14.40
  12   8  -1  249.08   14.90
  12   8  -1  250.97   13.20
  11  -8  -1  405.96   22.00
  11   8  -1  416.46   20.20
  11   8  -1  429.46   21.90
 -11   8   1  438.76   21.60
 -10  -8   1  100.59   11.40
  10  -8  -1   94.69   10.20
 -10   8   1   90.79    8.30
  -9  -8   1   88.89   10.20
   9  -8  -1   78.99    8.60
  -8  -8   1   16.30    5.10
   8  -8  -1    9.20    4.40
  -8  -8   1    7.90    4.60
  -7  -8   1  203.18   13.90
   7  -8  -1  238.28   13.90
  -7  -8   1  229.48   13.10
   7   8  -1  251.17   14.10
  -6  -8   1   73.49    6.50
  -6  -8   1   69.39    6.80
   6  -8  -1   72.79    6.70
   6   8  -1   64.19    6.60
   5  -8  -1  177.68   10.50
  -5  -8   1  176.88   10.40
  -5  -8   1  185.58   11.20
   5   8  -1  171.68   10.30
   4  -8  -1   67.89    5.30
  -4  -8   1   68.79    5.70
   4   8  -1   67.49    5.50
  -3  -8   1  740.83   33.20
   3  -8  -1  744.83   32.90
   3   8  -1  710.23   32.80
   2  -8  -1  477.05   20.30
  -2  -8   1  438.36   20.70
  -2   8   1  415.26   22.10
   2   8  -1  429.66   20.50
   1  -8  -1  185.18    8.70
  -1  -8   1  193.68    9.50
  -1   8   1  157.88   10.00
   1   8  -1  157.88    9.40
   0  -8  -1 1217.48   52.39
   0  -8   1 1224.08   52.09
   1  -8   1  141.29    7.30
  -1  -8  -1  149.29    7.00
  -2  -8  -1  432.56   19.90
  -2  -8  -1  412.76   18.80
   2  -8   1  442.66   19.60
   2   8   1  419.26   18.90
  -3  -8  -1  700.33   31.70
   3  -8   1  707.13   31.70
   3   8   1  707.03   30.80
   4  -8   1   72.59    5.30
  -4  -8  -1   66.19    5.30
   4   8   1   61.19    4.80
   5  -8   1  174.48   10.40
  -5  -8  -1  174.58   10.00
  -5  -8  -1  174.98   10.90
   5   8   1  167.68    9.70
  -6  -8  -1   68.09    6.10
   6  -8   1   61.69    6.50
  -6  -8  -1   73.99    6.90
  -7  -8  -1  239.38   14.90
  -7  -8  -1  250.67   13.30
   7  -8   1  258.67   14.80
   8  -8   1   19.30    5.10
  -9  -8  -1   96.39    9.80
   9  -8   1   73.89    8.80
  10  -8   1   99.89   11.50
  11  -8   1  434.96   21.70
  11  -8   1  486.45   25.80
  11   8   1  406.26   21.70
  11   8   1  385.06   19.80
 -11   8  -1  402.46   21.10
  12  -8   1  246.38   20.60
  12  -8   1  242.08   14.30
  12   8   1  241.48   14.50
 -12   8  -1  236.88   14.20
  12   8   1  246.58   12.70
  13  -8   1   13.90    3.40
  13   8   1    8.40    4.00
  13   8   1    8.70    2.50
 -13   8  -1    6.80    3.30
  14   8   1   15.10    4.00
 -14   8  -1   21.10    4.00
  14   8   1   28.10    3.50
  15   8   1   21.20    3.90
 -15   8  -1   16.50    3.50
 -16   8  -1   45.00    5.60
 -17   8  -1   46.30    5.20
 -17   9   1    3.60    2.30
 -16   9   1   41.70    5.00
  15   9  -1   16.40    4.00
 -15   9   1   20.00    3.50
 -14   9   1   35.10    5.30
  14   9  -1   22.80    3.40
  14   9  -1   21.60    4.30
  13  -9  -1   39.70    6.20
 -13   9   1   38.20    5.80
  13   9  -1   36.70    5.10
  13   9  -1   37.00    4.20
  12  -9  -1   10.20    3.80
  12  -9  -1   10.80    9.50
  12   9  -1    9.00    4.00
  12   9  -1   14.80    2.70
 -12   9   1    7.80    3.60
  11  -9  -1   50.59    7.40
  11  -9  -1   32.90    9.00
  11   9  -1   37.30    6.50
  11   9  -1   42.20    4.70
 -11   9   1   35.80    5.80
 -10  -9   1  142.69   14.30
  10  -9  -1  136.49   13.20
  10   9  -1  129.79    9.70
 -10   9   1  129.19    9.30
  10   9  -1  116.59    7.80
  -9  -9   1  350.16   20.90
   9  -9  -1  322.47   19.40
  -8  -9   1  267.87   16.90
   8  -9  -1  330.27   18.00
  -8  -9   1  342.57   19.10
  -7  -9   1   43.60    6.50
  -7  -9   1   45.70    6.50
   7  -9  -1   34.60    5.80
   7   9  -1   38.10    6.20
  -6  -9   1  185.38   11.90
   6  -9  -1  200.08   12.10
  -6  -9   1  197.68   12.80
   6   9  -1  214.58   12.10
   5  -9  -1  301.87   15.60
  -5  -9   1  294.87   15.60
   5   9  -1  284.07   15.10
   4  -9  -1  483.65   23.00
  -4  -9   1  498.15   23.30
   4   9  -1  466.95   22.60
  -3  -9   1   64.59    5.30
   3  -9  -1   65.59    5.20
  -3   9   1   77.69   10.60
   2  -9  -1 1229.48   53.99
  -2  -9   1 1276.47   54.79
  -2   9   1 1192.88   55.79
   2   9  -1 1264.47   54.49
   1  -9  -1   75.39    4.60
  -1  -9   1   66.39    5.00
  -1   9   1   54.89    6.60
   1   9  -1   60.89    5.40
   0  -9  -1  346.17   15.10
   0  -9   1  317.37   14.60
   1  -9   1   59.59    4.10
  -1  -9  -1   56.69    3.60
   1   9   1   67.09    4.60
   2  -9   1 1185.68   52.49
  -2  -9  -1 1233.78   53.19
  -2  -9  -1 1172.38   51.69
   2   9   1 1238.98   51.89
   3  -9   1   75.89    5.70
   3   9   1   75.29    4.50
   4  -9   1  478.65   22.60
  -4  -9  -1  452.25   22.40
   4   9   1  486.95   21.40
   5  -9   1  291.67   15.30
  -5  -9  -1  284.37   16.10
  -5  -9  -1  284.57   14.90
  -6  -9  -1  223.28   13.50
  -6  -9  -1  213.98   12.30
   6  -9   1  218.48   13.00
  -7  -9  -1   40.00    6.80
  -7  -9  -1   31.90    5.10
   7  -9   1   43.00    6.40
   8  -9   1  328.97   19.00
  -8  -9  -1  329.47   19.80
   9  -9   1  322.47   19.50
  -9  -9  -1  317.67   20.40
  10  -9   1  119.79   10.30
  10  -9   1  135.09   12.40
 -10   9  -1  131.39    9.30
  10   9   1  114.49    7.60
  10   9   1  120.29    9.50
  11  -9   1   35.00    9.60
  11  -9   1   40.60    7.00
  11   9   1   49.60    6.80
 -11   9  -1   48.50    6.40
  11   9   1   49.00    4.90
  12  -9   1   10.30    3.80
  12  -9   1   20.30   10.70
  12   9   1   14.80    2.70
 -12   9  -1   20.60    4.30
  12   9   1   13.40    4.20
  13   9   1   42.70    6.50
 -13   9  -1   46.20    6.20
  13   9   1   40.80    4.30
 -14   9  -1   20.50    4.20
  14   9   1   27.20    4.30
 -15   9  -1   27.60    4.20
  15   9   1   26.20    3.90
 -16   9  -1   55.69    5.70
 -17   9  -1    5.90    2.20
 -16  10   1   13.30    2.80
  15  10  -1   11.10    3.30
 -15  10   1    6.10    2.60
 -14  10   1   18.80    3.60
  14  10  -1   14.70    3.90
  13  10  -1    8.40    3.60
 -13  10   1   15.90    3.70
  13  10  -1   12.60    2.50
  12 -10  -1   21.40    4.60
  12  10  -1   18.30    4.10
 -12  10   1   14.90    3.80
  11 -10  -1  119.99    9.80
  11 -10  -1  132.99   14.90
  11  10  -1   95.19    6.90
  11  10  -1  110.99    9.10
 -11  10   1  105.49    8.30
  10 -10  -1 1293.17   63.59
  10 -10  -1 1405.56   66.49
 -10  10   1 1464.65   63.19
  10  10  -1 1497.05   63.59
  10  10  -1 1425.56   61.79
  -9 -10   1  158.78   14.40
   9 -10  -1  153.58   13.00
   8 -10  -1  177.88   12.40
  -8 -10   1  182.58   14.00
  -8 -10   1  157.18   12.80
   7 -10  -1  161.28   11.50
  -7 -10   1  160.28   12.00
  -7 -10   1  162.98   11.50
  -6 -10   1   -4.70    3.60
  -6 -10   1   -3.90    3.50
   6 -10  -1   -3.80    3.30
   6  10  -1    0.60    2.90
  -5 -10   1  559.74   26.90
   5 -10  -1  540.95   26.60
   5  10  -1  572.74   26.20
  -4 -10   1  826.82   37.70
   4 -10  -1  818.82   37.20
   4  10  -1  808.92   36.70
  -3 -10   1 4804.42  206.18
   3 -10  -1 4889.61  205.58
  -3  10   1 4571.44  207.58
   3  10  -1 5008.40  205.38
  -2 -10   1 1616.24   69.49
   2 -10  -1 1597.14   68.59
   2  10  -1 1594.74   68.99
  -2  10   1 1518.55   70.39
  -1 -10   1  104.59    7.30
   1 -10  -1  103.09    6.30
  -1  10   1  112.29    8.60
   1  10  -1  110.69    7.50
   0 -10   1   45.10    4.50
   0 -10   1   43.10    2.90
   0 -10  -1   38.80    3.50
   0  10   1   47.60    5.20
   1 -10   1   96.99    5.90
  -1 -10  -1   96.59    5.40
   1  10   1  113.99    6.40
  -2 -10  -1 1443.06   65.29
  -2 -10  -1 1555.74   67.39
   2 -10   1 1536.65   66.49
   2  10   1 1607.14   65.79
   3 -10   1 4794.22  204.38
  -3 -10  -1 4360.66  202.88
  -3 -10  -1 5104.49  204.98
   3  10   1 4923.11  202.98
  -4 -10  -1  858.51   38.00
   4 -10   1  803.62   37.70
   5 -10   1  529.75   26.00
  -5 -10  -1  553.84   27.20
  -5 -10  -1  545.35   26.00
   6 -10   1   -0.60    3.30
  -6 -10  -1    4.90    3.90
  -6 -10  -1   -1.20    3.20
  -7 -10  -1  153.48   11.50
  -7 -10  -1  153.08   10.90
   7 -10   1  152.98   11.30
   8 -10   1  170.88   12.80
  -8 -10  -1  162.98   12.80
   9 -10   1  142.49   13.00
  -9 -10  -1  140.19   12.60
 -10 -10  -1 1526.35   70.49
  10 -10   1 1449.65   65.99
  10  10   1 1347.27   63.69
  10  10   1 1496.05   65.89
 -10  10  -1 1553.14   65.79
  11 -10   1  115.89   15.30
  11 -10   1  108.99    9.00
  11  10   1  124.59    9.30
 -11  10  -1  109.69    8.80
  11  10   1  112.29    7.20
  12  10   1   16.90    4.30
 -12  10  -1   21.30    4.10
  12  10   1   12.90    2.60
 -13  10  -1    6.90    3.10
  13  10   1    4.50    3.20
  14  10   1    7.40    3.30
 -14  10  -1    7.20    2.90
 -15  10  -1    3.90    2.60
  15  10   1    6.20    3.00
 -16  10  -1   11.60    2.80
 -16  11   1    5.00    2.30
  15  11  -1    6.00    3.00
 -15  11   1   -0.10    2.20
  14  11  -1   -0.40    3.00
 -14  11   1    6.30    2.80
 -13  11   1    5.20    2.80
  13  11  -1   11.50    3.50
  13  11  -1    6.00    2.00
  12  11  -1   72.49    7.70
  12  11  -1   70.49    5.40
 -12  11   1   79.59    7.10
  11 -11  -1  243.28   14.60
  11 -11  -1  256.07   20.20
  11  11  -1  228.68   12.00
  11  11  -1  221.78   13.80
 -11  11   1  244.18   13.80
  10 -11  -1   48.20    8.50
 -10 -11   1   56.79   10.90
  10 -11  -1   77.19   12.30
 -10  11   1   52.29    6.10
  10  11  -1   51.49    5.20
  10  11  -1   63.19    7.10
  -9 -11   1   22.20    7.90
   9 -11  -1   11.10    5.90
   9  11  -1   17.80    4.10
   9  11  -1   21.60    4.30
  -9  11   1   19.00    3.40
  -8 -11   1  100.89   11.40
   8 -11  -1   85.49   10.00
   7 -11  -1  145.39   11.60
  -7 -11   1  166.48   12.40
  -7 -11   1  157.58   12.40
   6 -11  -1   26.10    5.10
  -6 -11   1   20.80    5.30
  -6 -11   1   29.70    6.10
   6  11  -1   17.30    3.80
  -5 -11   1   53.69    6.70
   5 -11  -1   54.79    6.20
   5  11  -1   60.79    5.60
   4 -11  -1 1120.99   49.50
  -4 -11   1 1106.19   50.09
   4  11  -1 1087.79   48.70
  -3 -11   1    1.70    2.80
   3 -11  -1    4.80    2.60
   3  11  -1    6.50    2.50
  -3  11   1   -1.00    8.10
   2 -11  -1  406.56   18.80
  -2 -11   1  429.56   20.00
   2  11  -1  374.46   18.90
  -2  11   1  361.06   21.50
   1 -11  -1  159.78    8.30
  -1 -11   1  155.28    9.40
  -1  11   1  133.79   10.50
   1  11  -1  143.39    9.30
   0 -11   1   31.70    4.20
   0 -11   1   27.40    2.40
   0 -11  -1   34.00    3.30
   0  11   1   27.10    4.20
   0  11  -1   26.00    4.30
   1 -11   1  136.89    7.50
  -1 -11  -1  125.49    6.90
  -1 -11  -1  150.08    9.00
   1  11   1  140.89    8.00
   1  11   1  157.98    8.20
  -2 -11  -1  391.46   19.40
   2 -11   1  364.96   18.20
  -2  11  -1  382.56   22.20
   2  11   1  407.06   17.40
  -3 -11  -1    8.00    2.80
   3 -11   1    8.30    2.80
  -3  11  -1   -3.80   10.10
  -4 -11  -1 1125.99   50.59
   4 -11   1 1120.69   50.19
   5 -11   1   63.99    6.70
  -5 -11  -1   59.59    6.70
  -5 -11  -1   64.99    6.90
   6 -11   1   12.10    4.10
  -6 -11  -1   18.30    5.20
  -6 -11  -1   18.30    4.90
   7 -11   1  149.59   11.60
  -7 -11  -1  161.28   12.00
  -7 -11  -1  130.79   11.30
   8 -11   1  101.89   10.40
  -8 -11  -1   91.79   10.30
  -9 -11  -1   20.00    7.00
   9 -11   1   18.10    6.90
   9  11   1   13.00    5.00
   9  11   1   22.90    4.60
  -9  11  -1   21.60    4.10
 -10  11  -1   72.49    7.00
  10  11   1   65.59    7.30
  10  11   1   60.29    5.60
  11  11   1  235.98   11.80
 -11  11  -1  239.58   13.90
  11  11   1  228.78   14.00
 -12  11  -1   74.09    7.30
  12  11   1   83.19    7.70
  13  11   1   10.50    3.50
 -13  11  -1   11.50    3.50
  14  11   1   11.70    3.50
 -14  11  -1    6.00    2.70
  15  11   1    7.90    2.80
 -15  11  -1    2.50    2.50
 -16  11  -1    9.20    2.50
 -16  12   1   33.80    3.80
  15  12  -1    9.90    2.90
 -15  12   1    4.00    2.30
 -14  12   1   36.50    5.00
  14  12  -1   41.40    5.50
  13  12  -1   13.50    3.50
 -13  12   1    6.90    2.70
  12  12  -1   31.60    5.00
 -12  12   1   39.60    5.40
  11 -12  -1   51.09   12.20
 -11  12   1   92.09    7.50
  11  12  -1   91.29    8.00
  11  12  -1   85.69    5.80
  10 -12  -1   93.89   10.40
  10 -12  -1   95.39   14.20
 -10 -12   1  114.69   16.00
  10  12  -1  108.69    8.90
  10  12  -1  108.39    7.00
 -10  12   1  122.79    8.50
 -10  12   1   95.99    8.70
  -9 -12   1  416.26   25.40
   9 -12  -1  383.16   23.10
   9  12  -1  360.16   18.50
   9  12  -1  400.26   20.30
  -9  12   1  390.46   19.70
   9  12  -1  403.36   20.60
   8 -12  -1  401.46   24.70
  -8 -12   1  467.45   26.90
  -8  12   1  503.95   25.80
  -7 -12   1  372.06   21.50
  -7 -12   1  386.46   22.70
   7 -12  -1  373.46   21.00
   6 -12  -1   19.90    5.10
  -6 -12   1   13.50    5.10
  -6 -12   1   24.40    5.70
  -5 -12   1    6.20    4.70
   5 -12  -1   23.10    4.60
   5  12  -1   11.80    3.00
  -4 -12   1  162.38   10.90
   4 -12  -1  171.68   10.40
   4  12  -1  146.19    8.90
   3 -12  -1  400.96   19.40
  -3 -12   1  428.06   20.60
  -3  12   1  359.36   24.80
   3  12  -1  380.06   18.70
   2 -12  -1   32.20    4.40
  -2 -12   1   21.30    4.00
   2  12  -1   22.20    3.60
  -2  12   1   24.90    7.10
  -1 -12   1   23.90    4.10
   1 -12  -1   29.70    4.10
   1  12  -1   32.60    5.00
  -1  12   1   32.20    5.60
   0 -12   1   15.50    3.50
   0  12   1    9.70    3.20
   0  12   1   13.90    3.90
   0  12  -1    8.80    3.60
  -1 -12  -1   23.20    2.80
  -1 -12  -1   27.80    4.30
   1 -12   1   26.70    3.80
   1  12   1   31.60    3.80
   1  12   1   31.60    4.30
  -2 -12  -1   24.10    4.30
   2 -12   1   22.00    3.50
  -2  12  -1   32.60    8.60
   2  12   1   24.20    2.30
   3 -12   1  371.46   18.50
  -3 -12  -1  379.56   19.40
  -4 -12  -1  157.08   10.40
   4 -12   1  149.59    9.90
  -5 -12  -1   12.40    4.60
   5 -12   1   19.50    4.40
   6 -12   1   24.90    5.30
  -6 -12  -1   29.50    6.20
  -6 -12  -1   25.90    6.50
   7 -12   1  352.16   19.80
  -7 -12  -1  300.57   19.40
  -7 -12  -1  377.56   21.00
  -8 -12  -1  446.96   25.20
   8 -12   1  443.16   23.90
  -8  12  -1  393.86   24.40
  -9 -12  -1  378.26   24.10
   9 -12   1  380.86   23.30
   9  12   1  404.46   20.50
   9  12   1  370.76   20.00
  -9  12  -1  386.46   19.70
  10 -12   1  114.09   14.70
 -10 -12  -1  101.49   14.80
 -10  12  -1  121.79    8.70
  10  12   1  109.09    9.00
  10  12   1  104.89    9.20
  11 -12   1   88.89   13.80
 -11  12  -1   71.99    6.90
  11  12   1   64.89    7.30
 -12  12  -1   44.70    5.80
  12  12   1   44.60    6.50
  13  12   1   10.70    3.30
 -13  12  -1   16.40    3.60
  14  12   1   28.80    4.40
 -14  12  -1   36.20    5.00
  15  12   1   13.80    2.80
 -15  12  -1    9.80    2.60
 -16  12  -1   33.10    3.90
 -16  13   1   18.10    2.90
  15  13  -1    3.50    2.50
 -15  13   1    2.50    2.10
 -14  13   1   33.30    4.70
  14  13  -1   38.50    5.20
 -13  13   1    2.10    2.50
  13  13  -1    7.40    3.10
  12  13  -1    2.00    3.00
 -12  13   1    1.90    2.60
  11  13  -1  107.79    8.70
 -11  13   1   83.29    8.40
 -11  13   1  115.79    8.30
 -10 -13   1   32.10    9.80
  10 -13  -1   19.10   10.10
 -10  13   1   22.20    4.40
 -10  13   1   20.50    3.80
  10  13  -1   19.50    4.30
  10  13  -1   29.90    4.80
  -9 -13   1  199.68   17.20
   9 -13  -1  213.78   16.70
  -9  13   1  194.18   11.80
   9  13  -1  203.88   12.70
  -9  13   1  189.48   12.10
   9  13  -1  198.48   12.30
  -8 -13   1   61.49   10.50
   8 -13  -1   66.69   10.70
   8  13  -1   54.89    7.20
  -8  13   1   72.59    6.30
   8  13  -1   66.09    6.80
   7 -13  -1  192.78   14.10
  -7 -13   1  204.38   15.50
  -7 -13   1  185.28   14.60
   6 -13  -1  253.67   15.80
  -6 -13   1  256.87   16.50
  -6 -13   1  271.17   17.60
   5 -13  -1  144.29   10.90
  -5 -13   1  144.99   11.70
   5  13  -1  174.98    8.70
  -4 -13   1   64.79    7.70
   4 -13  -1   57.69    7.20
   4  13  -1   77.39    5.40
  -3 -13   1   88.29    7.70
   3 -13  -1   82.99    7.40
   3  13  -1  102.19    6.50
   2 -13  -1  333.17   16.20
  -2 -13   1  342.57   17.70
  -2  13   1  290.87   19.70
   2  13  -1  320.77   16.20
  -1 -13   1  338.37   18.40
   1 -13  -1  326.77   16.50
   1  13  -1  366.26   17.90
  -1  13   1  347.37   18.90
   0 -13  -1    4.40    2.50
   0 -13   1    3.40    2.80
   0  13   1    6.30    3.80
   0  13  -1    1.70    3.40
   0  13   1    6.60    3.10
  -1 -13  -1  351.06   18.80
   1 -13   1  389.96   19.40
   1  13   1  345.37   16.80
  -1  13  -1  350.26   20.60
   1  13   1  361.36   16.90
  -2 -13  -1  303.37   16.30
   2 -13   1  298.87   14.80
  -2  13  -1  278.17   20.10
   3 -13   1  100.19    7.90
  -3 -13  -1  102.99    8.60
   4 -13   1   94.59    8.00
  -4 -13  -1   80.29    8.10
  -5 -13  -1  172.68   12.00
   5 -13   1  163.58   11.50
  -6 -13  -1  271.57   17.10
  -6 -13  -1  248.38   16.50
   6 -13   1  245.18   15.80
   7 -13   1  203.18   14.80
  -7 -13  -1  216.08   16.00
   8 -13   1   56.29    9.20
  -8 -13  -1   68.79   11.60
  -8  13  -1   65.69    6.50
   8  13   1   67.49    7.60
   8  13   1   58.89    6.90
   9 -13   1  184.88   17.30
  -9 -13  -1  186.18   18.30
   9  13   1  213.08   12.70
   9  13   1  197.18   12.70
  -9  13  -1  227.58   12.50
 -10 -13  -1   27.90   11.10
  10 -13   1   23.80   10.50
 -10  13  -1   21.50    3.80
  10  13   1   16.40    3.70
  10  13   1   20.10    4.40
  11  13   1  126.29    9.60
 -11  13  -1  125.09    9.10
  12  13   1   -0.50    2.80
 -12  13  -1    0.40    2.50
 -13  13  -1    3.70    2.50
  13  13   1    5.50    2.90
  14  13   1   34.40    5.20
 -14  13  -1   40.40    5.10
  15  13   1    4.60    2.40
 -15  13  -1    5.20    2.30
 -16  13  -1    9.70    2.10
  15  14  -1   28.70    4.00
 -15  14   1   37.00    4.00
 -14  14   1    3.20    2.10
  14  14  -1    4.30    2.70
  13  14  -1   53.89    6.00
 -13  14   1   51.89    5.50
  12  14  -1   16.70    3.80
 -11  14   1    5.40    3.70
 -11  14   1    3.20    2.50
  11  14  -1    2.00    3.00
 -10 -14   1   -2.40   11.10
  10 -14  -1    6.00   11.20
 -10  14   1   12.90    3.10
 -10  14   1   20.50    4.20
  10  14  -1    8.20    3.70
  10  14  -1   10.30    3.70
   9 -14  -1   24.10    9.20
  -9 -14   1   19.80    9.10
   9  14  -1   28.10    4.60
   9  14  -1   23.40    4.30
  -9  14   1   13.10    4.20
  -9  14   1   17.30    3.40
   8 -14  -1    4.30    7.60
  -8 -14   1    5.90    7.10
   8  14  -1   11.10    3.80
  -8  14   1    1.40    3.90
   8  14  -1   11.90    3.70
  -8  14   1    8.90    2.90
  -7 -14   1   22.10    7.40
  -7 -14   1   14.90    8.70
   7 -14  -1   22.00    7.10
  -7  14   1   14.70    3.20
   7  14  -1   19.40    4.10
   7  14  -1   18.90    4.00
   6 -14  -1    8.30    5.70
  -6 -14   1    8.40    6.00
  -6 -14   1   12.60    7.10
  -5 -14   1   10.60    5.60
   5 -14  -1   11.50    5.20
  -4 -14   1   54.29    7.90
   4 -14  -1   48.80    7.70
  -3 -14   1   20.90    4.80
   3 -14  -1   14.10    4.30
   3  14  -1   21.40    3.60
   2 -14  -1  255.97   14.50
  -2 -14   1  261.87   16.10
   2  14  -1  302.27   14.30
  -1 -14   1  180.08   11.70
   1 -14  -1  157.98   11.40
   1  14  -1  173.68   10.70
  -1  14   1  174.28   12.70
   0 -14  -1   33.80    5.50
   0 -14   1   39.60    5.80
   0  14   1   40.00    5.50
   0  14  -1   32.80    6.10
   0  14  -1   33.40    6.40
   0  14   1   32.80    5.10
  -1 -14  -1  179.88   11.80
   1 -14   1  184.48   12.10
  -1  14  -1  176.28   14.70
   1  14   1  176.08    9.20
   1  14   1  192.78    9.50
   2 -14   1  295.27   16.90
  -2 -14  -1  317.07   16.90
   2 -14   1  259.77   14.90
   3 -14   1   10.60    4.40
  -3 -14  -1   16.00    4.80
  -4 -14  -1   60.09    8.10
   4 -14   1   57.39    8.00
   5 -14   1   13.30    5.30
  -5 -14  -1   14.40    5.90
  -6 -14  -1   12.30    5.90
  -6 -14  -1   16.10    7.80
   6 -14   1   16.40    6.20
   7 -14   1   24.00    7.40
  -7 -14  -1   13.70    7.00
   7  14   1   20.50    4.60
  -7  14  -1   18.80    3.70
   7  14   1   14.70    3.90
  -8 -14  -1   18.50    8.40
   8 -14   1    6.50    7.90
   8  14   1    7.10    3.60
   8  14   1    3.70    3.60
  -8  14  -1   10.60    3.10
  -8  14  -1    4.70    4.20
  -9 -14  -1   22.40   10.60
   9 -14   1   27.90   10.20
  -9  14  -1   15.80    5.00
  -9  14  -1   25.60    4.00
   9  14   1   26.30    4.50
   9  14   1   24.60    4.80
 -10 -14  -1   10.70   11.10
  10 -14   1   26.30   12.30
  10 -14   1    7.90   12.30
  10  14   1    6.50    3.40
 -10  14  -1    8.90    3.00
  10  14   1   12.60    3.70
  11  14   1    3.30    2.90
 -11  14  -1   -0.30    2.50
 -12  14  -1   19.80    3.70
  12  14   1   23.40    4.10
  13  14   1   47.10    6.00
 -13  14  -1   61.89    5.90
 -14  14  -1    4.90    2.30
  14  14   1    2.70    2.50
 -15  14  -1   30.60    3.70
  15  14   1   31.70    4.10
 -15  15   1   -0.60    1.60
  15  15  -1    0.20    2.10
 -14  15   1    0.90    1.90
  14  15  -1    1.90    2.40
  13  15  -1   13.70    3.30
 -13  15   1   14.00    2.90
  12  15  -1    0.90    2.60
 -12  15   1    3.70    2.40
 -11  15   1   72.59    7.40
 -11  15   1   73.89    6.80
  11  15  -1   77.69    7.20
 -10  15   1   30.50    4.70
  10  15  -1   23.90    4.20
  10  15  -1   27.60    4.50
 -10  15   1   23.50    4.50
  -9 -15   1   77.99   13.80
   9 -15  -1   71.49   12.70
  -9  15   1   97.89    7.40
   9  15  -1   84.49    8.00
   9  15  -1   85.39    8.10
  -9  15   1   87.89    8.00
  -8 -15   1  305.77   22.40
   8 -15  -1  273.07   21.90
   8  15  -1  332.97   17.50
   8  15  -1  333.77   17.80
  -8  15   1  339.47   16.70
  -8  15   1  293.17   16.70
   7 -15  -1   15.30    8.00
  -7 -15   1    2.00   12.70
  -7 -15   1   16.30    7.30
   7  15  -1   23.00    4.40
  -7  15   1   12.70    3.90
  -7  15   1   19.20    3.60
   7  15  -1   10.50    3.80
  -6 -15   1  128.59   13.30
  -6 -15   1  133.39   14.70
   6 -15  -1  133.89   13.20
   6  15  -1  120.29    8.50
  -6  15   1  119.29    8.20
   6  15  -1  119.09    9.40
  -6  15   1  125.99    8.40
   5 -15  -1   60.09   10.30
  -5 -15   1   74.09   10.40
   4 -15  -1   49.80    7.10
  -4 -15   1   42.40    7.40
   3 -15  -1   34.00    5.90
  -2 -15   1   13.20    4.80
   2  15  -1   18.00    3.80
   2  15  -1   14.60    3.00
   1 -15  -1  155.78   11.20
  -1 -15   1  152.88   11.70
   1  15  -1  145.39    9.70
   1  15  -1  132.69   10.60
  -1  15   1  151.88   12.30
  -1  15   1  143.79   10.70
   0 -15   1  269.77   16.00
   0 -15  -1  264.17   15.80
   0  15  -1  241.48   16.10
   0  15   1  263.37   14.20
   0  15   1  264.87   14.00
   0  15  -1  260.67   15.30
   1 -15   1  166.88   11.90
  -1 -15  -1  172.28   11.80
  -1  15  -1  157.58   12.20
  -2 -15  -1   22.30    5.60
   2 -15   1   17.40    4.80
  -2  15  -1   -7.10   11.40
  -3 -15  -1   40.00    6.90
   3 -15   1   48.20    7.40
   4 -15   1   37.40    7.10
  -4 -15  -1   51.69    7.90
  -5 -15  -1   60.09    9.20
   5 -15   1   77.09   10.90
   6 -15   1  126.59   13.90
  -6 -15  -1  150.68   15.40
  -6 -15  -1  118.49   12.20
  -6  15  -1  128.39    8.70
   6  15   1  122.89   10.10
   6  15   1  134.29    9.50
  -7 -15  -1   20.00    8.00
   7 -15   1   12.60    9.10
  -7  15  -1   15.40    3.30
   7  15   1   28.10    4.90
   7  15   1   22.20    4.20
   8 -15   1  340.97   23.50
  -8 -15  -1  356.66   23.70
   8  15   1  311.07   17.60
   8  15   1  302.77   17.30
  -8  15  -1  312.97   16.80
   9 -15   1   95.19   16.40
  -9 -15  -1   77.69   13.60
   9 -15   1   87.99   14.60
   9  15   1   95.69    8.40
  -9  15  -1   73.49    8.40
  -9  15  -1  108.99    7.70
   9  15   1  100.69    8.40
  10  15   1   21.00    4.10
 -10  15  -1   14.60    3.40
  10  15   1   23.90    4.40
 -11  15  -1   75.59    6.80
  11  15   1   82.59    7.50
  12  15   1    3.80    2.60
 -12  15  -1    6.90    2.70
  13  15   1   15.00    3.30
 -13  15  -1   15.00    3.20
  14  15   1    2.00    2.30
 -14  15  -1    0.30    2.00
 -15  15  -1   -0.90    1.50
  15  15   1   -0.30    1.90
  15  16  -1    5.40    2.10
 -15  16   1    9.40    1.90
 -14  16   1    8.40    2.20
  14  16  -1   12.20    2.70
 -13  16   1    5.90    2.40
  13  16  -1    5.00    2.50
 -12  16   1   27.20    4.40
  12  16  -1   23.50    4.10
 -11  16   1    9.60    2.80
 -11  16   1   12.60    3.70
 -10  16   1   39.80    6.60
  10  16  -1   37.70    6.00
  10  16  -1   42.40    5.80
 -10  16   1   47.40    5.50
  -9 -16   1   29.80   13.40
   9 -16  -1   13.50   14.50
   9  16  -1   27.00    4.50
   9  16  -1   39.10    6.00
  -9  16   1   25.10    4.40
  -9  16   1   25.90    4.50
  -8 -16   1  135.99   17.30
   8 -16  -1  126.69   19.10
  -8  16   1  138.79    8.90
   8  16  -1  129.89    9.80
  -8  16   1  119.59    9.20
   8  16  -1  120.19    9.30
  -7 -16   1   15.30    8.20
   7 -16  -1   15.70   10.00
   7  16  -1   18.30    4.10
  -7  16   1    9.50    3.70
   7  16  -1   14.50    3.90
  -7  16   1   10.10    3.10
  -6 -16   1   14.40    9.90
  -6 -16   1    7.70    7.30
   6 -16  -1   30.40    9.10
  -6  16   1   14.90    3.30
   6  16  -1   14.60    3.60
   6  16  -1   21.50    4.50
  -6  16   1   15.20    4.00
  -6  16   1   14.60    3.60
   5 -16  -1   40.20    8.70
  -5 -16   1   24.20    7.80
   5  16  -1   36.60    5.60
   5  16  -1   31.10    4.80
  -5  16   1   30.70    4.50
  -5  16   1   29.40    5.00
  -4 -16   1   18.60    6.70
  -3 -16   1   24.30    6.30
   1 -16  -1   13.20    5.20
  -1 -16   1    7.40    4.60
   1  16  -1    4.30    4.40
   1  16  -1    5.10    3.30
  -1  16   1    4.30    5.70
  -1  16   1    7.70    4.30
   0 -16   1   42.30    7.20
   0 -16  -1   38.40    7.10
   0  16  -1   41.50    7.20
   0  16   1   32.30    4.80
   0  16  -1   42.10    7.20
   0  16   1   33.20    6.00
  -1 -16  -1    6.70    4.80
   1 -16   1    6.20    5.00
  -1  16  -1    3.60    7.80
  -1  16  -1    4.80    4.90
   2 -16   1  601.94   30.40
  -2 -16  -1  542.15   29.50
   3 -16   1   27.70    6.50
  -3 -16  -1   29.50    7.00
  -4 -16  -1   20.70    7.10
   4 -16   1   14.30    6.00
  -5 -16  -1   26.00    7.20
  -5 -16  -1   44.40    9.20
   5 -16   1   35.30    7.50
  -5  16  -1   36.60    4.90
   5  16   1   26.80    4.40
   5  16   1   43.40    6.30
  -5  16  -1   38.50    5.10
   6 -16   1   11.60   16.20
  -6 -16  -1   11.00    8.10
  -6 -16  -1   22.90   10.40
   6  16   1   16.50    4.10
  -6  16  -1   10.00    4.20
   6  16   1   19.90    4.10
  -6  16  -1   14.70    3.50
  -7 -16  -1    6.80    8.80
   7 -16   1    4.70   11.10
   7 -16   1    4.10    8.00
  -7  16  -1   10.50    3.30
   7  16   1   20.20    4.30
  -7  16  -1   13.40    4.20
   7  16   1   17.90    4.00
   8 -16   1  138.09   20.40
  -8 -16  -1  142.29   17.90
   8 -16   1  138.19   17.10
   8  16   1  135.39   10.20
  -8  16  -1  144.39    9.30
   8  16   1  132.99    9.70
  -8  16  -1  110.89    9.70
  -9 -16  -1   24.10   18.40
   9 -16   1   18.60   12.80
   9  16   1   24.80    4.60
  -9  16  -1   25.50    4.70
   9  16   1   21.20    4.40
  -9  16  -1   33.70    5.00
  10  16   1   37.80    5.90
  10  16   1   40.10    6.00
 -10  16  -1   44.70    5.40
  11  16   1   10.30    3.40
 -11  16  -1   10.50    3.00
 -12  16  -1   25.20    4.50
  12  16   1   28.90    4.50
  13  16   1    7.60    2.70
 -13  16  -1    8.50    2.40
  14  16   1   12.60    2.70
 -14  16  -1   10.40    2.30
  15  16   1    4.60    2.00
 -15  16  -1    5.30    1.80
  14  17  -1    3.00    2.10
 -14  17   1    1.20    1.70
  13  17  -1   52.69    5.30
 -13  17   1   49.60    4.80
 -12  17   1   40.50    4.90
  12  17  -1   44.80    5.60
  11  17  -1    5.90    2.70
 -11  17   1    6.00    3.20
 -11  17   1    4.20    2.30
 -10  17   1   -0.40    2.20
 -10  17   1    5.80    3.40
  10  17  -1    1.00    2.80
  10  17  -1    3.40    2.80
  -9  17   1   13.10    3.70
   9  17  -1    7.80    3.40
   9  17  -1   19.20    4.00
  -9  17   1   12.90    3.10
  -8 -17   1    0.80   11.20
  -8  17   1   33.00    4.80
   8  17  -1   24.90    4.60
  -8  17   1   17.40    4.00
   8  17  -1   36.10    5.50
  -7 -17   1   26.40   10.90
  -7  17   1   22.10    4.20
   7  17  -1   29.50    4.80
  -7  17   1   27.30    4.10
   7  17  -1   38.00    5.60
  -6 -17   1  158.68   16.80
  -6 -17   1  137.39   19.90
   6  17  -1  180.28   11.00
  -6  17   1  159.48    9.90
   6  17  -1  150.58   11.00
  -6  17   1  152.78   10.50
  -5 -17   1    7.80    9.00
  -5  17   1   33.40    4.90
  -5  17   1   33.10    4.70
   5  17  -1   21.40    4.20
   5  17  -1   32.30    4.80
  -5  17   1   34.00    5.80
  -4 -17   1  182.38   15.50
   4  17  -1  168.08   10.60
  -4  17   1  164.68   10.80
  -4  17   1  157.98    9.80
   4  17  -1  171.38   11.30
  -4  17   1  173.68   10.50
   3 -17  -1   30.00    6.80
  -3 -17   1   27.30    7.50
   3  17  -1   26.80    5.10
  -3  17   1   31.80    5.00
   2 -17  -1  140.89   12.90
  -2 -17   1  131.49   12.00
  -2  17   1  115.79   11.50
   1 -17  -1   11.60    5.50
  -1 -17   1    8.10    5.50
  -1  17   1   19.60    4.70
   1  17  -1   11.50    2.90
  -1  17   1   14.70    5.90
   1  17  -1    7.80    3.60
   0 -17  -1  551.64   29.20
   0 -17   1  523.75   29.10
   0  17  -1  539.75   27.20
   0  17  -1  558.74   26.70
   1 -17   1   11.00    6.50
  -1 -17  -1   19.90    5.90
  -1  17  -1   -5.20    8.10
  -1  17  -1   11.30    5.30
   2 -17   1  114.49   11.30
  -2 -17  -1  110.29   12.20
  -2  17  -1  135.39   12.60
  -3 -17  -1   27.90    7.50
   3 -17   1   21.10    6.70
   3  17   1   37.60    5.50
  -3  17  -1   33.30    5.90
  -4 -17  -1  170.08   15.40
   4 -17   1  192.18   15.00
  -4  17  -1  172.78   10.40
   4  17   1  171.48   11.30
   4  17   1  170.28   10.80
  -4  17  -1  166.98   10.10
   5 -17   1   30.80    8.90
  -5 -17  -1   47.00   11.00
  -5 -17  -1   34.10    8.40
  -5  17  -1   19.40    4.60
   5  17   1   24.90    4.30
   5  17   1   21.40    4.50
  -5  17  -1   31.70    4.80
   6 -17   1  172.68   16.70
  -6 -17  -1  130.09   15.20
   6  17   1  155.68   11.00
   6  17   1  165.88   10.90
  -6  17  -1  145.19   10.50
  -6  17  -1  176.78   10.10
  -7 -17  -1   24.90   10.60
   7 -17   1   16.20    9.90
   7  17   1   24.30    4.80
   7  17   1   21.90    4.40
  -7  17  -1   22.60    4.60
  -7  17  -1   17.90    3.50
  -8 -17  -1    5.70   11.40
   8 -17   1   23.90   11.00
  -8  17  -1   13.90    4.10
   8  17   1   14.30    4.30
  -8  17  -1   12.80    3.20
   8  17   1   20.40    4.00
   9  17   1   18.40    4.10
  -9  17  -1   10.40    3.30
  -9  17  -1    6.60    4.00
   9  17   1    7.20    3.20
  10  17   1    6.00    3.10
  10  17   1    4.50    3.10
 -10  17  -1    5.20    2.70
 -11  17  -1    1.00    2.30
  11  17   1    3.80    2.80
 -12  17  -1   40.80    5.00
  12  17   1   48.90    5.60
  13  17   1   53.89    5.40
 -13  17  -1   60.79    5.30
 -14  17  -1    3.20    1.70
  14  17   1    2.70    2.20
 -14  18   1   27.20    3.20
  14  18  -1   19.50    3.20
 -13  18   1   35.80    3.90
  13  18  -1   34.60    4.50
 -12  18   1   21.60    3.70
  12  18  -1   23.00    3.60
 -11  18   1    2.40    2.20
  11  18  -1    7.70    2.90
  10  18  -1    2.20    2.70
 -10  18   1    5.60    2.50
  10  18  -1    9.90    3.00
 -10  18   1    8.10    3.30
   9  18  -1   10.60    3.50
   9  18  -1    8.80    3.20
  -9  18   1    5.10    3.30
  -9  18   1    6.00    2.60
   8  18  -1   24.70    4.40
   8  18  -1   24.10    4.20
  -8  18   1   17.70    4.00
  -8  18   1   27.30    4.70
   7 -18  -1   -1.30    9.50
  -7 -18   1   14.90   12.30
  -7  18   1   19.00    4.00
   7  18  -1   24.50    4.50
  -7  18   1   22.50    3.70
   7  18  -1   15.40    3.80
   6 -18  -1   79.79   13.30
  -6 -18   1   66.99   13.30
   6  18  -1   97.19    8.00
   6  18  -1  104.89    8.50
  -6  18   1   70.69    7.50
  -6  18   1   87.69    6.80
  -5 -18   1   52.39   11.90
   5 -18  -1   52.79    9.90
  -5  18   1   35.60    5.70
  -5  18   1   52.69    6.20
  -5  18   1   47.50    5.30
   5  18  -1   56.59    6.20
   5  18  -1   43.50    6.50
  -4 -18   1    5.50    9.10
   4 -18  -1   10.00    7.70
  -4  18   1    4.00    3.20
  -4  18   1    6.50    3.00
   4  18  -1    5.30    3.20
  -4  18   1    1.80    2.50
   4  18  -1    7.80    3.40
  -3 -18   1   86.49   12.40
   3 -18  -1   67.89   10.80
  -3  18   1   48.30    5.70
  -3  18   1   59.29    6.80
   3  18  -1   55.29    6.50
   3  18  -1   47.40    6.70
  -3  18   1   62.09    6.20
   2 -18  -1  727.33   37.00
  -2  18   1  713.23   32.80
  -2  18   1  752.32   34.70
   2  18  -1  675.53   33.50
  -2  18   1  684.33   33.50
   2  18  -1  679.23   33.00
   1 -18  -1   78.29   11.10
  -1 -18   1  112.29   11.90
   1  18  -1   87.39    8.30
  -1  18   1   95.79    7.90
  -1  18   1   95.19    8.60
  -1  18   1   93.09    7.70
  -1  18   1   94.69    7.30
   0 -18   1   -2.00    5.90
   0 -18  -1   -5.00    5.70
   0  18  -1    1.40    4.90
   0  18   1    0.60    3.10
   0  18  -1   -4.00    3.40
   0  18  -1   -2.60    3.80
   1 -18   1  105.89   11.30
  -1 -18  -1  109.59   12.50
  -1  18  -1   92.79    7.60
   1  18   1   93.29    7.80
  -1  18  -1   74.99    8.10
  -2 -18  -1  703.43   37.30
   2  18   1  654.43   33.40
  -2  18  -1  727.13   33.00
   2  18   1  696.63   33.70
  -2  18  -1  689.53   33.50
  -2  18  -1  777.12   36.60
   3 -18   1   60.39   10.10
  -3 -18  -1   45.60    9.30
  -3  18  -1   67.59    6.00
  -3  18  -1   73.69   12.20
   3  18   1   69.09    6.60
  -3  18  -1   66.89    7.40
  -3  18  -1   63.49    6.40
   3  18   1   67.39    6.80
   4 -18   1   -0.40    6.70
  -4 -18  -1   14.10    9.60
   4  18   1    2.10    3.10
  -4  18  -1    2.00    2.60
   4  18   1    6.90    3.50
  -4  18  -1    4.90    2.90
  -4  18  -1    1.60    3.60
  -5 -18  -1   21.30    8.80
  -5 -18  -1   28.80   12.10
   5 -18   1   50.69    9.70
  -5  18  -1   42.10    6.20
  -5  18  -1   45.00    5.40
   5  18   1   53.99    6.90
   5  18   1   39.40    5.50
  -6 -18  -1   84.89   14.20
   6 -18   1  119.19   14.30
   6  18   1   76.99    7.80
  -6  18  -1   80.89    6.70
   6  18   1   76.69    7.50
  -6  18  -1   71.19    7.50
  -7 -18  -1   18.50   11.40
   7 -18   1   24.20   11.40
   7  18   1   16.50    3.70
  -7  18  -1   20.40    4.20
   7  18   1   18.20    4.40
  -7  18  -1   19.90    3.40
   8  18   1   23.70    4.30
  -8  18  -1   33.50    4.90
   8  18   1   17.60    4.30
  -8  18  -1   27.80    4.60
   9  18   1    6.00    3.20
  -9  18  -1    7.40    2.70
  -9  18  -1    3.70    3.50
   9  18   1    4.70    3.00
  10  18   1    4.20    3.00
 -10  18  -1    7.00    2.60
  10  18   1    6.00    3.00
  11  18   1    1.20    2.50
 -12  18  -1   17.60    3.00
  12  18   1   14.40    3.10
  13  18   1   29.20    4.00
 -13  18  -1   29.70    3.60
  14  18   1   22.60    3.30
 -14  18  -1   31.00    3.20
 -13  19   1   94.19    6.00
  13  19  -1   92.79    6.40
 -12  19   1   13.60    2.50
  12  19  -1   12.90    2.80
 -11  19   1    9.70    2.50
  11  19  -1    9.50    2.90
 -10  19   1    7.20    2.50
  10  19  -1    9.10    3.10
 -10  19   1   12.20    3.70
   9  19  -1   26.90    4.40
   9  19  -1   24.30    4.30
  -9  19   1   29.50    4.40
  -9  19   1   24.50    4.00
   8  19  -1  252.57   14.80
  -8  19   1  256.97   13.70
  -8  19   1  220.38   13.90
   8  19  -1  269.27   14.70
  -7  19   1   29.70    4.70
   7  19  -1   31.50    4.90
   7  19  -1   32.90    5.10
  -7  19   1   33.00    4.80
  -6 -19   1  194.48   21.10
   6 -19  -1  222.88   21.00
   6  19  -1  198.18   12.20
   6  19  -1  185.68   12.40
  -6  19   1  183.68   10.90
  -6  19   1  181.58   11.80
  -5 -19   1   10.00    9.70
  -5 -19   1   26.80   13.30
   5 -19  -1   23.10   10.10
   5  19  -1   14.50    3.50
  -5  19   1   19.60    3.20
   5  19  -1   10.20    3.70
  -5  19   1   11.80    3.60
  -4 -19   1   -4.70   10.60
   4 -19  -1   19.90    9.00
  -4  19   1   11.20    4.00
  -4  19   1   11.70    2.90
   4  19  -1   11.90    3.80
  -4  19   1   17.30    3.40
   4  19  -1   13.80    3.60
   3 -19  -1   31.40    9.30
  -3 -19   1   31.00   10.30
  -3  19   1   48.50    6.50
  -3  19   1   53.69    5.80
   3  19  -1   41.70    6.40
  -3  19   1   50.89    8.40
   3  19  -1   46.50    6.20
  -3  19   1   43.00    5.20
   2 -19  -1  482.95   28.00
  -2 -19   1  435.26   27.80
  -2  19   1  431.86   24.10
   2  19  -1  469.45   23.40
  -2  19   1  482.05   22.70
  -2  19   1  475.45   23.40
  -2  19   1  464.65   23.30
   2  19  -1  457.55   22.80
   2  19  -1  462.65   22.50
  -2  19   1  408.76   21.20
   1 -19  -1  507.95   29.70
  -1 -19   1  484.65   29.60
   1  19  -1  476.45   24.60
  -1  19   1  515.15   25.40
  -1  19   1  536.85   24.80
   1  19  -1  488.95   25.40
   1  19  -1  527.05   24.70
   0 -19   1  510.15   30.50
   0 -19  -1  520.15   30.40
   0  19   1  536.35   25.40
   0  19  -1  525.15   25.40
   0  19   1  508.45   25.70
   0  19   1  534.55   26.30
   0  19  -1  511.75   25.50
   0  19  -1  556.64   26.60
  -1 -19  -1  518.15   29.00
  -1  19  -1  455.45   22.30
   1  19   1  486.45   23.50
   1  19   1  496.85   24.50
  -1  19  -1  475.05   24.30
   1  19   1  454.75   23.60
  -1  19  -1  514.85   23.80
  -1  19  -1  438.96   23.40
  -1  19  -1  513.65   24.60
  -2 -19  -1  446.36   28.20
   2 -19   1  467.35   28.60
   2  19   1  470.45   23.00
  -2  19  -1  433.06   22.10
  -2  19  -1  493.15   23.90
   2  19   1  465.45   23.20
  -2  19  -1  499.05   26.20
   2  19   1  463.35   23.90
  -2  19  -1  491.45   23.30
  -3 -19  -1   40.30   10.00
   3 -19   1   37.10    9.70
  -3  19  -1   30.50    5.00
   3  19   1   33.80    5.60
   3  19   1   33.60    5.80
   3  19   1   27.10    4.70
  -3  19  -1   38.90    8.60
  -3  19  -1   28.10    4.60
  -3  19  -1   29.60    4.80
   4 -19   1   32.00   10.00
  -4 -19  -1   24.80   11.70
  -4  19  -1   21.30    8.90
  -4  19  -1   17.00    3.30
  -4  19  -1   10.90    4.00
   4  19   1   11.20    4.00
   4  19   1    6.90    3.50
  -5 -19  -1   37.00   11.40
  -5 -19  -1   26.00   17.00
   5 -19   1   36.60   10.50
   5  19   1   15.70    4.00
  -5  19  -1    7.60    3.70
  -5  19  -1   13.20    3.10
   5  19   1   16.10    4.30
   6 -19   1  186.18   21.00
   6  19   1  224.68   13.00
  -6  19  -1  195.28   11.50
   6  19   1  207.98   12.60
  -6  19  -1  179.28   12.20
   7  19   1   35.00    5.10
  -7  19  -1   35.10    5.00
   7  19   1   32.80    5.60
  -7  19  -1   22.50    4.40
  -8  19  -1  256.77   15.00
   8  19   1  273.47   15.40
  -8  19  -1  274.87   14.60
   8  19   1  262.77   15.60
  -9  19  -1   27.10    4.60
   9  19   1   34.20    5.70
  -9  19  -1   41.50    5.10
   9  19   1   34.60    5.50
  10  19   1    2.60    2.70
  10  19   1    4.80    2.80
 -10  19  -1    9.40    2.60
  11  19   1    7.50    2.80
 -11  19  -1    9.80    2.50
  12  19   1   24.40    3.90
 -12  19  -1   20.60    3.60
  13  19   1   72.59    5.90
 -13  19  -1   85.79    5.60
  13  20  -1   34.00    3.70
 -13  20   1   37.80    3.30
  12  20  -1    9.10    2.60
 -12  20   1    8.00    2.00
 -11  20   1    2.50    1.90
  11  20  -1    5.30    2.30
 -10  20   1    6.10    2.30
  10  20  -1    5.00    2.60
 -10  20   1    9.50    3.20
  -9  20   1   19.70    3.70
  -9  20   1   19.10    3.00
   9  20  -1   15.70    3.60
   9  20  -1   11.40    3.20
   8  20  -1    3.70    3.00
  -8  20   1    1.70    2.20
  -8  20   1   -2.70    3.00
   8  20  -1    3.20    2.90
  -7  20   1   78.29    7.50
   7  20  -1   89.19    8.10
   7  20  -1   88.39    7.60
  -7  20   1   83.69    6.50
   6  20  -1   13.00    3.70
  -6  20   1    8.60    2.70
   6  20  -1    9.20    3.80
  -6  20   1   10.00    3.70
  -5 -20   1    0.80   16.10
  -5 -20   1   30.90   13.00
   5 -20  -1   55.49   17.30
  -5  20   1   35.90    4.50
   5  20  -1   34.60    5.40
  -5  20   1   34.50    5.10
   5  20  -1   32.80    5.60
   4 -20  -1   -0.50    9.70
  -4 -20   1   -4.00   12.60
  -4  20   1   -7.60    8.00
   4  20  -1    0.90    2.80
  -4  20   1   -1.00    3.00
   4  20  -1    3.00    3.20
  -4  20   1    1.50    2.70
  -4  20   1    4.50    2.40
  -3 -20   1  160.88   19.30
   3 -20  -1  159.18   17.80
  -3  20   1  160.88    9.90
   3  20  -1  157.58   10.00
  -3  20   1  147.29   13.20
   3  20  -1  143.19   10.70
  -3  20   1  133.89   10.10
  -3  20   1  142.39    8.80
  -2 -20   1  208.98   19.70
   2 -20  -1  215.98   19.80
  -2  20   1  216.58   12.50
   2  20  -1  213.58   13.40
   2  20  -1  224.08   12.90
  -2  20   1  223.78   13.30
   2  20  -1  195.68   12.30
  -1 -20   1   26.50   10.40
   1 -20  -1   37.10    9.40
  -1  20   1   41.10    6.10
  -1  20   1   35.20    4.80
   1  20  -1   40.90    5.90
   1  20  -1   38.00    6.00
   0 -20   1   12.90    9.30
   0 -20  -1    5.80    9.00
   0  20  -1    9.70    3.40
   0  20  -1    4.30    3.60
   0  20   1    6.90    4.00
   0  20   1    8.40    3.10
   0  20   1   11.00    3.80
  -1 -20  -1   13.10    9.10
   1 -20   1   63.19   11.20
  -1  20  -1   29.30    5.10
  -1  20  -1   38.30    4.70
  -1  20  -1   33.30    5.50
  -1  20  -1   21.90    4.70
   1  20   1   31.50    5.10
   1  20   1   34.20    5.80
   1  20   1   28.40    4.60
  -2 -20  -1  188.78   19.80
   2 -20   1  203.48   18.20
   2  20   1  201.38   12.80
  -2  20  -1  206.68   12.00
   2  20   1  193.08   12.20
  -2  20  -1  216.08   15.00
   2  20   1  202.58   11.90
  -2  20  -1  201.08   11.00
  -2  20  -1  199.28   12.60
   3 -20   1  182.88   18.20
  -3 -20  -1  136.39   19.80
   3  20   1  155.28   10.40
  -3  20  -1  140.29   10.50
   3  20   1  152.88   10.90
  -3  20  -1  161.68   16.00
  -3  20  -1  146.79    9.00
   3  20   1  150.28   10.10
  -4 -20  -1    3.90   14.00
   4 -20   1    4.00    9.40
   4  20   1    2.00    3.30
   4  20   1    0.30    3.20
  -4  20  -1    2.50    3.30
  -4  20  -1    3.70    2.60
  -4  20  -1    0.40    9.00
  -5 -20  -1   19.70   12.50
   5 -20   1   27.60   16.20
  -5  20  -1   32.40   11.50
   5  20   1   39.00    5.70
  -5  20  -1   28.20    4.60
  -5  20  -1   25.10    3.60
   5  20   1   24.40    4.50
  -6  20  -1    8.90    2.80
   6  20   1   12.30    3.80
   6  20   1   10.90    3.60
  -6  20  -1   11.80    3.60
  -7  20  -1   85.49    6.70
   7  20   1   76.99    7.60
  -7  20  -1   73.19    7.50
   7  20   1   95.09    8.10
   8  20   1    4.60    2.90
  -8  20  -1    2.00    2.30
  -8  20  -1    3.60    3.30
   8  20   1   -0.50    2.80
   9  20   1   18.30    3.50
   9  20   1   22.70    3.80
  -9  20  -1   11.40    3.50
  -9  20  -1   16.50    3.10
 -10  20  -1    2.20    2.00
  10  20   1    2.00    2.80
 -11  20  -1    2.80    1.90
  11  20   1    2.70    2.30
 -12  20  -1    6.00    1.90
  12  20   1    2.30    2.10
 -13  20  -1   39.50    3.70
  13  20   1   38.90    3.90
  12  21  -1   16.30    2.80
 -12  21   1   15.70    2.60
  11  21  -1   17.00    3.10
 -11  21   1   17.50    3.00
  10  21  -1   46.00    5.30
 -10  21   1   32.30    4.40
 -10  21   1   42.70    4.20
  -9  21   1   32.40    3.90
  -9  21   1   23.60    4.00
   9  21  -1   29.40    4.90
   9  21  -1   39.00    5.10
   8  21  -1   51.79    6.20
  -8  21   1   49.90    4.80
  -8  21   1   48.10    6.00
   8  21  -1   51.39    6.10
  -7  21   1    0.20    2.70
   7  21  -1    4.60    3.10
  -7  21   1    1.70    2.10
   7  21  -1    2.60    2.80
  -6  21   1  -17.20   11.30
  -6  21   1    0.40    2.10
   6  21  -1    6.10    3.10
   6  21  -1    2.50    2.70
  -6  21   1    1.20    2.90
  -5  21   1   58.39    6.80
   5  21  -1   56.09    6.50
  -5  21   1   60.59   11.60
   5  21  -1   61.29    7.20
  -5  21   1   54.59    5.30
  -4  21   1   10.50    2.60
  -4  21   1    9.30    3.50
  -4  21   1   14.20    7.30
   4  21  -1    9.00    3.30
   4  21  -1   12.50    3.80
   3 -21  -1  364.56   27.10
  -3 -21   1  278.87   26.00
   3  21  -1  290.67   16.80
  -3  21   1  283.67   16.60
  -3  21   1  301.57   15.90
  -3  21   1  282.17   14.50
   3  21  -1  322.97   16.60
   2 -21  -1   73.19   13.40
  -2 -21   1   81.19   14.20
  -2  21   1   73.79    7.70
  -2  21   1   80.99    6.90
   2  21  -1   85.39    8.00
   2  21  -1   83.49    7.10
   1 -21  -1   37.70   12.20
  -1 -21   1   49.80   12.70
  -1  21   1   52.89    6.60
  -1  21   1   48.90    5.70
   1  21  -1   51.09    6.20
   1  21  -1   65.89    7.10
   0 -21  -1  118.99   17.90
   0 -21   1  166.98   17.40
   0  21  -1  126.69    9.50
   0  21   1  135.89    9.00
   0  21  -1  134.59    9.90
   0  21   1  145.09   10.00
   0  21   1  123.29    9.60
   0  21  -1  138.89    9.10
   1 -21   1   58.49   11.80
  -1 -21  -1   65.19   13.40
  -1  21  -1   47.70    6.50
   1  21   1   47.00    6.50
   1  21   1   48.80    5.50
  -1  21  -1   59.69    7.10
   1  21   1   50.79    6.60
   2 -21   1   78.29   14.00
  -2 -21  -1   57.29   13.50
   2  21   1  103.69    8.00
   2  21   1  102.89    8.50
  -2  21  -1   78.19    8.10
  -2  21  -1   92.99    6.60
   2  21   1   94.69    7.50
   3 -21   1  314.67   23.50
  -3 -21  -1  272.67   25.90
   3  21   1  265.37   15.20
   3  21   1  280.27   16.10
  -3  21  -1  295.97   18.80
   3  21   1  280.57   14.70
  -3  21  -1  247.38   15.50
  -3  21  -1  263.07   13.70
  -4  21  -1    4.70    3.40
   4  21   1   10.90    3.50
  -4  21  -1    9.90    9.50
  -4  21  -1    9.60    2.70
  -5  21  -1   64.79    5.60
  -5  21  -1   49.50    6.80
   5  21   1   59.39    6.50
  -5  21  -1   64.89   13.10
   5  21   1   61.19    7.00
  -6  21  -1    2.60    3.10
   6  21   1    2.10    3.30
  -6  21  -1    0.00    2.20
  -6  21  -1   -6.40   12.80
   6  21   1    2.60    2.90
  -7  21  -1   -0.50    2.00
  -7  21  -1   -6.70    2.90
   7  21   1   -2.60    2.80
   7  21   1   -5.60    2.50
  -8  21  -1   49.70    5.00
  -8  21  -1   48.80    6.10
   8  21   1   44.70    5.90
   8  21   1   57.39    6.20
   9  21   1   27.10    4.80
  -9  21  -1   33.10    4.10
   9  21   1   25.50    4.00
 -10  21  -1   37.50    4.10
  10  21   1   38.50    5.00
 -11  21  -1   17.80    3.10
  11  21   1   13.10    2.80
  12  21   1   12.50    2.40
 -12  21  -1   14.30    2.20
 -11  22   1    2.60    1.50
  11  22  -1    3.80    2.10
  10  22  -1   40.50    4.60
 -10  22   1   38.70    3.60
   9  22  -1   76.39    6.70
   9  22  -1   83.39    6.70
  -9  22   1   82.29    5.60
  -9  22   1   75.69    6.80
  -8  22   1    8.50    2.30
   8  22  -1   13.70    3.30
   8  22  -1   10.90    3.20
  -8  22   1   13.20    3.20
  -7  22   1   14.90    2.70
  -7  22   1   13.80    3.40
   7  22  -1   15.40    3.70
  -6  22   1    4.10    2.80
   6  22  -1    2.20    2.90
   6  22  -1   -0.20    2.50
  -6  22   1    1.60    2.00
  -5  22   1   10.20    3.50
   5  22  -1   17.00    3.60
   5  22  -1    9.40    3.60
  -5  22   1   16.30    2.70
   4  22  -1    9.50    4.00
   4  22  -1   15.30    3.60
  -4  22   1    7.20    2.50
  -4  22   1   19.30    4.00
  -3  22   1   48.50    6.50
   3  22  -1   49.10    6.10
   3  22  -1   50.79    6.60
  -2  22   1   82.39    7.00
  -2  22   1   89.19    7.80
   2  22  -1   78.89    7.90
   2  22  -1   78.79    7.30
   1  22  -1   20.80    3.80
  -1  22   1   17.50    4.00
  -1  22   1   19.20    3.70
   0  22   1   11.50    4.00
   0  22  -1    8.60    3.40
   0  22  -1    5.30    3.10
   1  22   1   14.00    3.80
  -1  22  -1    2.00    3.40
   1  22   1   10.30    3.50
  -1  22  -1    7.30    3.30
   2  22   1   91.19    8.30
   2  22   1   90.39    7.70
   2  22   1   95.39    7.40
  -2  22  -1   83.79    7.90
   3  22   1   56.59    6.50
  -3  22  -1   46.90    6.50
   3  22   1   57.29    6.90
  -3  22  -1   53.19    5.00
  -4  22  -1    4.00    7.70
   4  22   1    7.90    3.40
   4  22   1   14.70    3.60
  -4  22  -1   20.10    4.00
  -4  22  -1   12.50    2.70
  -5  22  -1   15.70    3.60
   5  22   1    4.50    3.00
  -5  22  -1    9.00   12.10
   5  22   1   16.10    3.90
  -5  22  -1    9.70    2.40
  -6  22  -1   -0.70    1.90
  -6  22  -1    2.70    2.90
   6  22   1    3.80    2.80
   6  22   1    0.80    3.00
  -7  22  -1    9.40    3.50
  -7  22  -1   14.50    2.70
   7  22   1   18.80    3.80
   7  22   1    9.40    3.10
  -8  22  -1   11.00    2.50
  -8  22  -1   15.50    3.80
   8  22   1   12.50    3.10
   8  22   1   13.70    3.30
   9  22   1   68.49    6.30
  -9  22  -1   71.79    5.40
   9  22   1   80.89    6.70
 -10  22  -1   36.80    3.70
  10  22   1   34.90    4.40
 -11  22  -1    3.10    1.50
  11  22   1    6.40    2.10
  11  23  -1   24.10    3.30
  10  23  -1   26.80    3.90
 -10  23   1   35.40    3.00
   9  23  -1   30.20    4.40
  -9  23   1   23.20    3.00
  -9  23   1   20.70    3.60
   8  23  -1    2.00    2.30
  -8  23   1    2.90    2.80
  -8  23   1    1.70    1.70
   8  23  -1    6.70    2.50
   7  23  -1    5.00    2.70
  -7  23   1    6.20    2.00
  -7  23   1    6.70    2.80
   7  23  -1    8.30    2.80
   6  23  -1   10.90    3.50
  -6  23   1   12.10    2.30
   6  23  -1   11.40    3.40
  -6  23   1    9.00    3.10
   5  23  -1   -2.80    2.70
   5  23  -1    3.40    2.80
  -5  23   1    0.50    2.00
  -5  23   1    3.40    2.80
   4  23  -1   53.79    6.40
   4  23  -1   49.90    5.90
  -4  23   1   46.60    6.20
  -3  23   1   97.29    8.30
   3  23  -1  101.39    8.10
   3  23  -1  101.49    8.60
   2  23  -1    2.60    2.80
   2  23  -1    4.90    3.10
  -2  23   1    4.80    3.10
  -1  23   1    6.30    3.10
   1  23  -1    6.40    3.30
   1  23  -1    4.30    3.30
   0  23  -1   32.60    4.70
   0  23  -1   32.60    5.30
   0  23   1   47.10    5.90
   1  23   1    1.70    3.20
  -1  23  -1    3.10    3.60
   1  23   1    6.20    3.30
  -1  23  -1    4.80    3.00
  -2  23  -1    1.50    2.90
   2  23   1   -0.60    2.90
   2  23   1    8.80    3.20
   3  23   1   85.59    8.00
  -3  23  -1   77.49    7.50
   3  23   1   84.49    7.30
   4  23   1   56.29    6.80
  -4  23  -1   55.19    6.30
   4  23   1   58.69    6.20
   5  23   1   -0.20    2.70
  -5  23  -1   -1.40    1.90
  -5  23  -1    1.70    2.80
   5  23   1   -1.40    2.50
   6  23   1   15.20    3.70
  -6  23  -1    9.00    3.20
  -6  23  -1   12.00    2.40
   6  23   1   15.20    3.50
   7  23   1    5.40    2.90
  -7  23  -1    4.80    2.00
  -7  23  -1    6.60    2.90
   7  23   1    9.80    3.10
   8  23   1    2.10    2.50
  -8  23  -1    1.30    3.00
   8  23   1    5.10    2.50
  -8  23  -1    2.10    1.80
   9  23   1   17.20    3.00
   9  23   1   19.50    3.20
  10  23   1   37.60    4.40
 -10  23  -1   33.90    3.20
 -11  23  -1   25.90    2.50
  11  23   1   22.30    3.30
  10  24  -1    0.80    1.80
   9  24  -1   14.00    2.70
   8  24  -1    9.50    2.60
   8  24  -1    9.50    2.60
  -8  24   1    8.30    2.90
   7  24  -1    0.40    2.30
  -7  24   1    5.60    2.50
   7  24  -1    8.00    2.60
   6  24  -1   51.09    5.60
  -6  24   1   48.60    5.60
   6  24  -1   53.39    5.80
   5  24  -1    7.30    3.10
  -5  24   1    6.70    2.90
   5  24  -1    8.40    2.80
   4  24  -1   17.60    3.90
   4  24  -1   16.80    3.40
  -4  24   1   19.40    3.60
  -3  24   1   -1.30    2.40
   3  24  -1    4.30    2.90
   3  24  -1    0.20    2.60
  -2  24   1   -0.40    2.70
   2  24  -1    3.70    2.60
   2  24  -1    6.90    3.20
   1  24  -1   43.60    6.00
   1  24  -1   46.20    5.80
  -1  24   1   48.80    6.10
   0  24   1    2.30    2.80
   0  24  -1    3.00    3.00
   0  24  -1    1.20    2.80
   0  24   1   -6.80    3.90
  -1  24  -1   42.20    5.90
   1  24   1   33.90    4.60
   1  24   1   35.60    5.60
   2  24   1    2.30    2.90
  -2  24  -1    1.90    2.80
   2  24   1    1.50    2.80
   3  24   1    0.20    2.80
   3  24   1   -1.70    2.60
  -3  24  -1   -3.10    2.40
   4  24   1   10.80    3.20
   4  24   1   14.00    3.70
  -4  24  -1   15.90    3.40
  -5  24  -1    7.90    3.00
   5  24   1    7.10    3.20
   5  24   1   16.00    3.30
  -6  24  -1   42.50    5.40
   6  24   1   43.40    5.40
   6  24   1   39.40    5.20
  -7  24  -1    7.20    1.70
   7  24   1    3.50    2.50
  -7  24  -1    4.10    2.90
   7  24   1    4.60    2.60
   8  24   1    5.90    2.30
   8  24   1    8.80    2.60
  -8  24  -1    7.30    1.70
  -9  24  -1    9.90    1.80
   9  24   1   10.20    2.50
  10  24   1    2.40    1.80
   9  25  -1    1.50    1.80
   8  25  -1   25.10    3.70
   8  25  -1   27.00    3.80
  -8  25   1   19.70    3.20
  -7  25   1   21.50    3.30
   7  25  -1   32.80    4.10
   7  25  -1   34.10    4.40
   6  25  -1    3.20    2.40
  -6  25   1    1.60    2.40
   6  25  -1    2.80    2.20
   5  25  -1   35.60    5.20
   5  25  -1   41.30    5.00
  -5  25   1   27.10    4.70
  -4  25   1   50.69    5.40
   4  25  -1   42.80    5.60
   4  25  -1   48.40    5.50
   3  25  -1    8.50    2.80
   3  25  -1   16.00    3.60
  -3  25   1   13.10    3.10
   2  25  -1    4.90    2.80
  -2  25   1    1.00    2.40
   2  25  -1    5.50    2.90
   1  25  -1   21.40    3.70
   1  25  -1   18.90    3.70
  -1  25   1   19.90    3.60
   0  25   1    4.00    2.70
   0  25  -1    0.10    2.90
   0  25  -1    4.90    2.70
  -1  25  -1   21.30    3.80
   1  25   1   30.00    5.10
  -2  25  -1    3.30    2.70
   2  25   1    3.70    2.70
   2  25   1    0.00    2.90
   3  25   1    5.50    3.10
  -3  25  -1    8.30    2.80
   3  25   1   13.60    3.10
  -4  25  -1   44.10    5.40
   4  25   1   50.79    5.40
   4  25   1   44.50    5.70
  -5  25  -1   37.50    4.90
   5  25   1   38.90    5.00
   5  25   1   33.30    5.20
   6  25   1    1.30    2.30
  -6  25  -1   -0.20    2.40
   6  25   1    2.20    2.20
   7  25   1   15.90    2.90
  -7  25  -1   19.90    3.30
   8  25   1   24.30    3.80
   8  25   1   24.40    4.00
   9  25   1    2.60    1.80
   8  26  -1   21.90    3.40
  -7  26   1    0.80    2.30
   7  26  -1    1.90    2.00
   7  26  -1    3.20    1.90
   6  26  -1   30.40    4.10
  -6  26   1   37.80    4.40
   6  26  -1   35.30    4.20
   5  26  -1   57.09    5.50
   5  26  -1   64.89    5.50
  -5  26   1   58.69    5.40
   4  26  -1    0.90    2.30
   4  26  -1    6.00    2.50
  -4  26   1    8.50    2.60
  -3  26   1   48.20    5.20
   3  26  -1   50.69    5.60
   3  26  -1   46.80    5.10
   2  26  -1    3.50    2.60
   2  26  -1    7.20    2.70
  -2  26   1    8.00    2.60
   1  26  -1   10.90    3.00
   1  26  -1   13.90    3.20
  -1  26   1   11.30    3.00
   0  26  -1    2.30    2.40
   0  26   1    2.10    2.40
   1  26   1   20.00    3.60
  -1  26  -1   17.80    3.40
   2  26   1    3.30    2.60
   2  26   1    5.70    2.90
  -2  26  -1    3.60    2.50
   3  26   1   52.79    5.20
   3  26   1   42.20    5.40
  -3  26  -1   46.00    5.20
   4  26   1    4.70    2.50
  -4  26  -1    5.90    2.50
   4  26   1    5.70    2.40
   5  26   1   50.49    5.30
  -5  26  -1   49.40    5.00
   5  26   1   59.49    5.40
   6  26   1   36.00    4.50
   6  26   1   31.30    4.20
  -6  26  -1   28.00    4.50
   7  26   1    3.00    1.80
   7  26   1    1.60    1.90
   8  26   1   26.00    3.50
   6  27  -1   30.90    3.70
   6  27  -1   34.90    3.80
  -6  27   1   25.40    3.50
  -5  27   1   13.90    2.40
   5  27  -1   13.00    2.80
   5  27  -1   10.80    2.40
   4  27  -1   16.60    2.80
  -4  27   1   16.40    2.80
   4  27  -1   25.00    3.80
   3  27  -1    6.50    2.40
   3  27  -1    6.20    2.50
  -3  27   1    9.40    2.50
   2  27  -1   46.90    5.00
  -2  27   1   40.50    4.60
   2  27  -1   41.20    4.80
  -1  27   1   10.70    2.70
   1  27  -1   17.30    3.10
   0  27  -1    1.60    2.30
   0  27   1    2.70    2.10
  -1  27  -1   11.90    2.80
   1  27   1   20.90    3.50
   2  27   1   40.90    4.90
  -2  27  -1   45.80    4.80
  -3  27  -1    3.60    2.20
   3  27   1    7.20    2.80
   3  27   1   -2.20    2.00
   4  27   1   18.90    3.00
  -4  27  -1   19.20    2.90
   4  27   1   17.70    3.10
   5  27   1   13.10    2.70
   5  27   1    8.60    2.20
  -5  27  -1   14.60    2.70
   6  27   1   30.30    4.10
   6  27   1   31.90    3.80
   5  28  -1    3.10    1.60
   5  28  -1    7.90    2.20
  -5  28   1    6.70    2.00
   4  28  -1   59.49    4.80
  -4  28   1   56.79    4.50
   4  28  -1   54.69    4.80
  -3  28   1    3.30    2.00
   3  28  -1    3.50    1.80
   3  28  -1    7.60    2.60
   2  28  -1    3.20    2.10
  -2  28   1    2.00    2.00
  -1  28   1   45.90    4.70
   1  28  -1   45.10    4.40
   0  28  -1    3.60    2.10
   0  28   1    1.80    2.00
   1  28   1   38.20    4.30
  -1  28  -1   31.40    3.80
   2  28   1    6.60    2.30
  -2  28  -1    6.20    2.10
   3  28   1    3.70    2.00
  -3  28  -1    4.40    2.00
  -4  28  -1   47.90    4.30
   4  28   1   51.49    5.00
   4  28   1   59.19    4.80
   5  28   1    5.00    1.90
   5  28   1    5.10    2.30
   2  29  -1   19.60    3.00
  -2  29   1   22.20    2.90
   1  29  -1   53.59    4.20
  -1  29   1   54.09    4.30
   0  29   1    1.00    1.60
   0  29  -1    1.60    1.70
   1  29   1   46.60    4.00
  -1  29  -1   49.10    4.10
  -2  29  -1   21.20    3.20
   2  29   1   21.80    3.10
  16   0  -2    0.10    1.90
  15   0  -2   25.70    4.40
  14   0  -2   56.39    5.70
  13   0  -2   17.80   10.50
  12   0  -2   25.40    3.90
  12   0  -2   15.20    7.90
  11   0  -2   73.29   10.10
  11   0  -2   56.99    5.70
  10   0  -2  279.77   17.20
   9   0  -2   -1.60    3.80
   8   0  -2  378.16   19.40
  -8   0   2  371.56   18.40
   7   0  -2  706.03   34.30
   7   0  -2  782.52   36.90
  -7   0   2  755.72   33.70
  -6   0   2  712.53   32.30
   6   0  -2  755.12   32.90
   6   0  -2  694.33   34.70
   5   0  -2   38.90    6.30
  -5   0   2   50.79    4.00
   5   0  -2   56.69    4.30
  -4   0   2   23.80    3.30
   4   0  -2   31.40    4.40
   4   0  -2   24.30    2.90
  -4   0   2   27.50    2.90
   3   0  -2    4.90    1.60
  -3   0   2    4.90    1.60
  -3   0   2    5.80    1.50
   3   0  -2    2.80    2.20
   2   0  -2 2399.06  105.29
  -2   0   2 2443.96  105.39
  -2   0   2 2414.36  105.49
   2   0  -2 2663.33  106.29
  -1   0   2   25.80    1.70
  -1   0   2   28.50    1.90
   1   0  -2   27.70    1.70
   1   0  -2   32.70    2.60
   0   0   2  104.19    4.80
   1   0   2   27.50    1.80
   1   0   2   27.10    1.40
  -1   0  -2   29.10    1.50
   2   0   2 2486.05  105.69
   3   0   2    4.20    1.50
   4   0   2   22.90    2.80
   5   0   2   57.49    4.50
   6   0   2  731.73   33.50
   7   0   2  803.02   37.10
   8   0   2  399.56   20.80
   9   0   2    8.20    4.30
  10   0   2  302.67   18.60
  11   0   2   50.89    5.80
  11   0   2   64.89   10.70
  12   0   2   27.60    8.50
  12   0   2   26.40    4.60
  13   0   2    0.00    2.40
  13   0   2    3.30   10.40
  14   0   2   53.79    5.50
  15   0   2   18.80    3.10
  16  -1  -2   23.00    3.80
  16   1  -2   23.10    3.70
  15  -1  -2   12.30    3.10
  15   1  -2    8.00    2.60
  14  -1  -2   24.50    3.80
  14   1  -2   20.00    3.60
  13  -1  -2   94.39    7.20
  13  -1  -2   94.09   15.80
  13   1  -2   73.19   13.40
  13   1  -2   76.19    6.70
  12  -1  -2    9.00    7.90
  12  -1  -2   12.40    3.50
  12   1  -2   16.80    7.70
  11  -1  -2   44.30    5.60
  11  -1  -2   38.70    7.90
  11   1  -2   44.40    8.20
  11   1  -2   55.29    5.60
  10  -1  -2    3.90    4.20
  10   1  -2   -0.80    4.70
   9  -1  -2   63.29    7.50
   9   1  -2   78.29    7.60
   8  -1  -2  241.18   13.80
  -8  -1   2  227.48   12.50
   8   1  -2  236.08   13.60
  -7  -1   2  821.42   38.80
   7  -1  -2  860.01   39.70
   7   1  -2  890.81   39.70
   7   1  -2  905.21   41.90
  -7   1   2  883.31   39.00
  -6  -1   2 2663.23  119.39
   6  -1  -2 2759.62  120.09
  -6  -1   2 2801.22  120.69
   6  -1  -2 2802.62  122.19
  -6   1   2 2800.62  119.59
   6   1  -2 2800.42  121.79
   6   1  -2 2902.01  120.09
   5  -1  -2  605.04   29.90
  -5  -1   2  622.24   28.70
  -5  -1   2  590.14   27.80
   5  -1  -2  615.14   28.30
  -5   1   2  649.04   28.00
   5   1  -2  654.63   28.20
   5   1  -2  619.04   29.60
   4  -1  -2  103.79    7.80
  -4  -1   2  105.69    6.10
   4  -1  -2  110.89    6.50
  -4  -1   2  118.59    6.70
   4   1  -2  116.29    6.40
  -4   1   2  111.29    6.20
   4   1  -2  106.69    7.40
   3  -1  -2  115.19    6.40
   3  -1  -2  130.19    7.70
  -3  -1   2  117.59    6.30
  -3  -1   2  114.29    6.50
   3   1  -2  114.59    6.20
   3   1  -2  129.19    7.40
  -3   1   2  123.19    6.40
   2  -1  -2 2438.26  100.19
  -2  -1   2 2320.77   99.39
   2  -1  -2 2292.87   99.39
  -2  -1   2 2186.88   99.49
  -2   1   2 2298.87   99.39
   2   1  -2 2379.16   99.19
   2   1  -2 2435.46  100.09
  -1  -1   2 2440.06  102.99
   1  -1  -2 2357.26  102.89
   1  -1  -2 2462.25  103.89
   1   1  -2 2490.55  103.49
   1   1  -2 2400.86  102.69
  -1   1   2 2409.16  102.99
   0  -1   2  143.59    6.70
   0   1   2  143.59    6.60
   0   1   2  154.58    6.90
  -1  -1  -2 2351.56  100.59
  -1  -1  -2 2484.35  100.39
   1  -1   2 2279.97  100.49
   1  -1   2 2385.26  100.79
   2  -1   2 2267.27   97.19
  -2  -1  -2 2299.87   97.19
   2   1   2 2281.97   97.19
   3  -1   2  108.89    6.30
  -3  -1  -2  124.89    5.40
  -3  -1  -2  120.79    6.50
   3   1   2  125.89    6.40
   4  -1   2  116.29    6.60
  -4  -1  -2  107.19    6.60
  -4  -1  -2  121.29    5.50
   4   1   2  108.29    6.40
   5  -1   2  649.14   28.80
   5   1   2  613.44   28.70
   6  -1   2 2729.33  120.89
   6   1   2 2882.31  120.99
   7  -1   2  901.51   39.40
   7   1   2  804.72   38.90
   8  -1   2  221.38   13.70
   8   1   2  254.87   14.00
   9  -1   2   65.29    7.40
   9   1   2   70.39    8.10
  10  -1   2    2.30    4.60
  10   1   2    1.80    5.00
  11  -1   2   50.49    5.70
  11  -1   2   42.70    7.80
  11   1   2   54.59    9.10
  11   1   2   35.70    5.20
  12  -1   2   25.60    4.60
  12  -1   2   21.80    9.10
  12   1   2   14.70    3.40
  12   1   2   16.00    8.40
  13  -1   2   77.19    7.00
  13  -1   2   83.09   13.30
  13   1   2   92.59    7.10
  13   1   2  106.09   15.00
  14  -1   2   26.00    4.40
  14   1   2   15.30    3.20
  15  -1   2    7.40    2.50
  15   1   2   10.80    2.60
  16  -2  -2    9.40    2.50
  16   2  -2   11.90    2.40
  15  -2  -2   45.00    5.30
  15   2  -2   42.90    4.90
 -14   2   2   22.00    4.90
  14   2  -2   27.80    4.60
  13  -2  -2   19.00    3.50
  13  -2  -2   11.50    9.30
  13   2  -2   23.50    3.80
  13   2  -2   24.30   11.70
 -13   2   2   25.90    5.20
  12  -2  -2   78.49   12.80
  12  -2  -2   55.69    6.10
  12   2  -2   61.19   10.50
 -12   2   2   74.29    8.80
  12   2  -2   78.59    6.40
  11  -2  -2   30.90    4.90
  11  -2  -2   33.50    6.70
  11   2  -2   29.90    7.20
  11   2  -2   28.90    4.80
  10  -2  -2    9.80    5.20
  10   2  -2   11.80    5.30
  -9  -2   2  122.49    9.20
   9  -2  -2  141.99   10.60
   9   2  -2  155.48   10.30
   8  -2  -2  108.09    8.30
  -8  -2   2   93.39    7.30
   8   2  -2  119.89   10.50
   8   2  -2  120.09    8.10
  -7  -2   2  233.48   13.90
  -7  -2   2  235.98   12.60
   7  -2  -2  234.38   13.40
   7   2  -2  268.77   15.40
   7   2  -2  265.87   13.40
  -6  -2   2 1056.29   46.70
   6  -2  -2 1089.39   48.60
  -6  -2   2  983.90   45.40
   6  -2  -2 1046.80   46.20
  -6   2   2 1018.30   45.60
   6   2  -2 1076.69   47.70
   6   2  -2  966.80   45.70
  -5  -2   2 1064.39   47.10
   5  -2  -2 1077.89   47.60
   5  -2  -2 1082.69   49.50
  -5  -2   2 1067.39   47.90
  -5   2   2 1089.29   47.20
   5   2  -2 1052.89   48.60
   5   2  -2 1108.19   47.30
   4  -2  -2  375.16   18.30
   4  -2  -2  392.86   19.90
  -4  -2   2  391.86   18.10
  -4  -2   2  367.76   18.50
  -4   2   2  410.56   18.20
   4   2  -2  414.06   19.30
   4   2  -2  407.96   18.10
   3  -2  -2  680.53   31.40
  -3  -2   2  663.93   30.10
  -3  -2   2  669.73   30.50
   3  -2  -2  680.73   30.20
  -3   2   2  722.73   30.20
   3   2  -2  661.43   30.90
   3   2  -2  711.93   29.90
   2  -2  -2 1102.99   44.90
   2  -2  -2 1073.19   44.00
  -2  -2   2  955.30   43.90
   2   2  -2 1028.00   43.60
  -2   2   2  977.40   44.00
   2   2  -2  980.60   44.50
   1  -2  -2   78.49    4.20
  -1  -2   2   86.19    4.40
  -1   2   2   81.49    4.30
   1   2  -2   86.49    3.90
   1   2  -2   83.59    5.00
   0  -2   2 3209.48  137.29
   0   2   2 3272.27  137.19
   1  -2   2   83.19    4.20
  -2  -2  -2  999.40   42.90
   2  -2   2 1012.00   43.60
  -2  -2  -2  965.70   43.60
   2   2   2 1064.19   43.60
  -3  -2  -2  685.73   29.20
   3  -2   2  673.83   30.20
  -3  -2  -2  698.93   30.30
   3   2   2  675.33   30.00
  -4  -2  -2  374.36   16.60
   4  -2   2  387.56   17.90
  -4  -2  -2  374.66   18.00
   4   2   2  391.86   17.80
  -5  -2  -2 1010.30   45.90
   5  -2   2 1058.89   47.40
  -5  -2  -2 1112.79   47.80
   5   2   2 1111.29   47.30
   6  -2   2  958.60   44.80
   6   2   2 1038.10   44.70
   7  -2   2  253.17   13.70
   7   2   2  237.48   13.40
   8  -2   2  118.89    9.10
   8   2   2  110.19    8.60
   9  -2   2  168.98   12.00
   9   2   2  148.89   11.00
  10  -2   2   18.70    6.00
  10   2   2    8.60    5.60
  11  -2   2   20.20    6.80
  11  -2   2   35.50    5.10
  11   2   2   31.10    4.90
  11   2   2   31.50    7.80
  12  -2   2   76.19    6.80
  12  -2   2   77.59   11.70
  12   2   2   58.59   10.70
  12   2   2   75.89    6.60
  13  -2   2   19.40   10.30
  13  -2   2   30.80    4.90
  13   2   2   27.40    4.50
  13   2   2   15.20   11.90
  14  -2   2   34.20    4.90
  14   2   2   43.00    5.00
  15   2   2   39.40    4.50
  16  -3  -2    9.20    2.60
 -16   3   2    6.10    3.80
  15  -3  -2    2.10    2.40
 -15   3   2    0.50    3.70
  15   3  -2    1.10    2.10
  14  -3  -2  137.79    8.90
  14   3  -2  110.69    8.10
 -14   3   2  121.09    9.80
  13  -3  -2   -4.40    9.00
  13  -3  -2    8.30    3.30
  13   3  -2    7.40    2.70
  13   3  -2    2.60   11.60
 -13   3   2    8.10    4.10
  12  -3  -2   23.80    4.20
  12  -3  -2   36.30    9.10
  12   3  -2   22.60    3.60
  12   3  -2   15.00    9.00
 -12   3   2   14.60    4.30
  11  -3  -2   34.00    5.60
  11  -3  -2   31.50    6.80
  11   3  -2   36.60    8.20
  11   3  -2   37.60    5.00
  10  -3  -2  174.48   13.40
  10   3  -2  184.48   13.30
  -9  -3   2   99.79    8.30
   9  -3  -2  108.59    8.90
   9   3  -2  110.89    9.20
   8  -3  -2  246.38   14.10
  -8  -3   2  224.58   12.80
   8   3  -2  253.77   13.70
   8   3  -2  255.47   16.00
  -7  -3   2  238.38   13.70
  -7  -3   2  228.68   12.30
   7  -3  -2  241.78   13.30
   7   3  -2  242.08   12.90
   7   3  -2  241.48   15.00
  -6  -3   2  494.05   23.50
   6  -3  -2  498.25   24.20
  -6  -3   2  495.25   24.60
   6   3  -2  544.25   25.70
   6   3  -2  528.05   23.80
  -5  -3   2  777.72   34.40
  -5  -3   2  719.43   33.40
   5  -3  -2  787.12   34.10
   5  -3  -2  674.63   35.70
   5   3  -2  788.22   33.50
   5   3  -2  762.82   35.00
  -4  -3   2  485.25   22.60
  -4  -3   2  482.85   23.20
   4  -3  -2  497.95   22.90
   4  -3  -2  495.75   24.70
   4   3  -2  527.95   23.80
   4   3  -2  507.05   22.40
   3  -3  -2  842.82   37.30
  -3  -3   2  853.31   37.30
   3  -3  -2  872.01   38.70
   3   3  -2  855.31   36.80
   3   3  -2  832.72   37.90
   2  -3  -2  179.78    9.90
  -2  -3   2  168.98    8.50
   2  -3  -2  167.78    8.40
   2   3  -2  174.38    7.90
   2   3  -2  178.88    9.10
  -1  -3   2 4364.56  187.78
   1  -3  -2 4349.67  187.58
   1   3  -2 4452.65  188.28
   1   3  -2 4551.64  186.98
   0  -3   2  126.69    6.50
   0   3   2  142.69    6.30
   1  -3   2 4464.05  188.88
  -2  -3  -2  171.18    7.80
   2  -3   2  171.98    8.30
  -3  -3  -2  832.42   35.90
  -3  -3  -2  826.22   36.90
   3  -3   2  808.92   36.70
   3   3   2  881.91   36.60
  -4  -3  -2  476.25   21.00
  -4  -3  -2  476.05   22.30
   4  -3   2  492.75   22.20
   4   3   2  482.85   21.90
   5  -3   2  787.92   34.10
  -5  -3  -2  756.22   34.30
  -5  -3  -2  706.63   32.50
   5   3   2  763.22   33.80
   6  -3   2  532.55   24.60
  -6  -3  -2  520.15   24.90
  -6  -3  -2  491.15   22.60
   6   3   2  521.35   24.30
   7  -3   2  247.28   14.10
   7   3   2  254.97   13.90
   8  -3   2  238.78   14.10
   8   3   2  241.68   13.80
   9  -3   2  104.99    9.10
   9   3   2  106.29    9.30
  10  -3   2  180.58   13.90
  10   3   2  184.08   13.70
  11  -3   2   40.20    8.00
  11  -3   2   37.20    5.30
  11   3   2   42.10    5.00
  11   3   2   29.30    7.70
  12  -3   2   14.00    8.40
  12  -3   2   19.50    3.80
  12   3   2   16.20    5.20
  12   3   2   14.90    9.20
  12   3   2   15.20    3.30
  13  -3   2    4.30    2.70
  13  -3   2   -1.40    9.90
  13   3   2    7.20    5.50
  13   3   2   11.30    3.00
  14  -3   2  117.59    8.50
  14   3   2  121.69    8.10
 -17   4   2    7.80    3.70
  16  -4  -2   21.00    3.70
 -16   4   2   21.00    4.20
  16   4  -2   25.40    3.40
  15  -4  -2    9.30    2.70
 -15   4   2    4.20    3.60
  15   4  -2    0.70    2.10
  14  -4  -2   18.50    3.60
  14   4  -2   26.00    4.30
 -14   4   2   25.60    4.60
  13  -4  -2    5.80    3.00
  13  -4  -2   14.10   10.20
  13   4  -2   10.30    2.90
  13   4  -2   30.20   13.50
 -13   4   2   16.30    4.10
  12  -4  -2   26.50    8.60
  12  -4  -2   37.00    5.60
  12   4  -2   22.30    3.70
 -12   4   2   19.40    4.50
  12   4  -2   24.20    9.60
  11  -4  -2   59.19    9.90
  11  -4  -2   56.09    6.50
  11   4  -2   42.10    5.20
  11   4  -2   50.59    8.70
  10  -4  -2   27.60    6.10
  10   4  -2   38.10    6.70
   9  -4  -2   59.09    7.40
  -9  -4   2   40.50    6.90
   9   4  -2   66.69    7.40
   8  -4  -2  122.29    9.00
  -8  -4   2  114.39    9.30
  -8  -4   2  119.09    8.20
   8   4  -2  125.19    8.90
   8   4  -2  136.19   10.80
   7  -4  -2  331.67   16.70
  -7  -4   2  295.47   15.30
  -7  -4   2  330.67   17.10
   7   4  -2  300.47   15.70
   7   4  -2  288.87   17.50
  -6  -4   2   56.59    4.80
   6  -4  -2   57.39    5.20
  -6  -4   2   56.39    5.40
   6   4  -2   57.09    4.80
   6   4  -2   49.10    6.40
  -5  -4   2  494.25   22.80
  -5  -4   2  492.95   23.70
   5  -4  -2  485.05   23.20
   5   4  -2  503.35   24.10
   5   4  -2  500.25   22.60
  -4  -4   2  467.25   22.00
  -4  -4   2  481.65   21.40
   4  -4  -2  475.55   21.60
   4   4  -2  446.26   22.10
   4   4  -2  456.85   20.80
   3  -4  -2    9.80    2.00
  -3  -4   2    7.40    1.80
   3   4  -2    7.60    1.40
   3   4  -2    4.10    2.10
   2  -4  -2  252.27   11.30
  -2  -4   2  246.88   11.50
   2   4  -2  228.98   10.50
   2   4  -2  226.98   11.80
  -1  -4   2  122.09    6.30
   1  -4  -2  125.79    6.00
   1   4  -2  112.99    6.80
  -1   4   2  116.49    6.90
   0  -4   2    5.80    1.30
   0  -4   2    6.40    0.90
   0  -4  -2    6.00    1.00
   0   4   2    7.00    1.30
   1  -4   2  114.49    5.60
   2  -4   2  232.88   10.70
  -2  -4  -2  217.38   10.30
  -3  -4  -2    5.40    1.80
  -3  -4  -2    5.30    1.30
   3  -4   2    9.20    2.20
   4  -4   2  456.85   21.10
  -4  -4  -2  434.36   20.10
  -4  -4  -2  459.75   21.30
   4   4   2  466.15   20.80
  -5  -4  -2  459.75   21.30
   5  -4   2  497.95   22.80
  -5  -4  -2  508.65   23.10
   5   4   2  468.65   22.30
  -6  -4  -2   48.60    3.70
   6  -4   2   46.70    4.90
  -6  -4  -2   51.59    5.10
   6   4   2   62.29    4.90
  -7  -4  -2  263.87   13.50
  -7  -4  -2  297.97   16.20
   7  -4   2  293.47   15.90
   7   4   2  337.27   15.90
   8  -4   2  125.49    9.60
   8   4   2  121.29    9.10
   9  -4   2   61.59    7.80
   9   4   2   51.99    6.90
  10  -4   2   32.00    6.80
  10   4   2   24.80    6.80
  11  -4   2   44.30    5.80
  11  -4   2   35.30    7.80
  11   4   2   45.10    8.80
  12  -4   2   18.80    3.80
  12  -4   2   20.90    8.80
  12   4   2   23.10    5.00
 -12   4  -2   13.20    4.70
  12   4   2   21.10    3.40
  13  -4   2    9.30    3.30
  13  -4   2   15.40   11.20
  13   4   2    7.10    4.60
  13   4   2   10.30    2.90
 -13   4  -2    5.10    4.70
  14  -4   2   14.20    3.10
 -14   4  -2   23.70    5.20
  14   4   2   25.70    4.00
 -15   4  -2   12.20    4.20
 -17   5   2    5.50    3.30
  16   5  -2   19.90    3.00
 -16   5   2   20.30    3.70
  15  -5  -2   30.40    4.90
 -15   5   2   43.30    6.40
  15   5  -2   34.10    4.30
  14  -5  -2   20.00    3.80
 -14   5   2   22.50    4.30
  14   5  -2   22.60    4.00
  13  -5  -2    8.80    3.10
  13   5  -2   10.40   25.00
 -13   5   2    0.60    3.60
  13   5  -2   11.00    2.90
  12  -5  -2   14.90    3.80
  12  -5  -2   24.30    8.40
  12   5  -2    6.50   10.70
 -12   5   2    9.40    4.10
  12   5  -2   11.40    2.90
  11  -5  -2   32.10    7.10
  11  -5  -2   37.50    5.90
 -11   5   2   33.50    4.80
  11   5  -2   22.90    8.10
  11   5  -2   32.20    4.90
  10  -5  -2   40.00    7.20
  10   5  -2   41.40    7.30
  -9  -5   2  178.38   12.70
   9  -5  -2  191.58   12.30
  -9  -5   2  151.58   10.90
   9   5  -2  178.58   11.90
   8  -5  -2   78.49    7.20
  -8  -5   2   71.59    6.90
  -8  -5   2   86.59    8.20
   8   5  -2   77.19    7.00
   8   5  -2   63.39    8.80
  -7  -5   2  255.77   14.50
   7  -5  -2  251.67   13.90
  -7  -5   2  234.68   13.10
   7   5  -2  251.47   15.20
   7   5  -2  252.87   13.40
   6  -5  -2  499.15   23.90
  -6  -5   2  492.95   24.40
  -6  -5   2  486.35   23.20
   6   5  -2  502.35   24.70
   6   5  -2  495.15   23.00
  -5  -5   2  102.89    6.70
   5  -5  -2   97.39    6.80
  -5  -5   2  104.19    7.30
   5   5  -2  111.09    7.80
   5   5  -2  115.39    6.40
  -4  -5   2  537.25   23.90
   4  -5  -2  509.15   23.20
  -4  -5   2  504.45   23.10
   4   5  -2  482.15   22.30
   4   5  -2  475.15   23.60
  -3  -5   2  129.79    7.20
   3  -5  -2  126.59    7.10
   3   5  -2  131.09    6.30
   3   5  -2  128.59    7.70
  -2  -5   2   72.19    4.80
   2  -5  -2   76.39    4.60
   2   5  -2   70.99    5.20
   2   5  -2   71.39    3.50
   1  -5  -2  260.97   12.30
  -1  -5   2  262.27   12.60
   1   5  -2  277.87   13.30
  -1   5   2  271.47   13.10
   0  -5   2  118.69    6.50
   0  -5   2  126.69    5.50
   0  -5  -2  121.29    6.00
   0   5   2  118.89    6.20
   1  -5   2  265.67   12.00
   2  -5   2   72.89    4.40
  -2  -5  -2   68.29    4.10
   3  -5   2  133.39    7.20
  -3  -5  -2  124.49    6.60
  -4  -5  -2  489.35   22.40
  -4  -5  -2  440.96   21.20
   4  -5   2  496.95   22.20
  -5  -5  -2  104.59    7.10
  -5  -5  -2  104.39    5.90
   5  -5   2  109.09    7.00
   5   5   2  103.09    6.50
  -6  -5  -2  442.86   21.40
  -6  -5  -2  482.05   23.60
   6  -5   2  509.95   23.50
   6   5   2  496.55   22.90
   7  -5   2  238.38   14.10
  -7  -5  -2  260.37   14.60
   7   5   2  263.67   14.00
  -8  -5  -2   76.99    7.60
   8  -5   2   72.79    7.20
   8   5   2   78.79    7.50
   9  -5   2  184.18   12.80
   9   5   2  194.48   13.10
  10  -5   2   37.30    6.90
  10   5   2   27.70    7.10
  11  -5   2   48.20    9.20
  11  -5   2   32.40    5.40
  11   5   2   26.10    3.80
  11   5   2   36.40    5.80
  12  -5   2   16.60    8.60
  12   5   2   17.10    3.20
 -12   5  -2   14.40    4.50
  12   5   2   24.50    4.90
  13  -5   2  -10.60   16.70
  13  -5   2    8.10    3.00
  13   5   2    2.60    3.90
  13   5   2    8.60    2.70
 -13   5  -2    7.10    4.50
  14  -5   2   27.90    4.70
  14   5   2   22.50    4.60
  14   5   2   25.70    4.00
 -14   5  -2   30.30    5.10
 -15   5  -2   24.40    4.40
 -16   5  -2   19.30    4.40
 -17   6   2   31.60    5.30
 -16   6   2   28.70    4.90
  15  -6  -2   -0.80    2.20
  15   6  -2    3.90    2.00
 -15   6   2    0.60    3.00
  14   6  -2    5.30    2.30
 -14   6   2    6.30    3.10
  13  -6  -2   18.50    4.00
  13   6  -2   11.70    2.90
 -13   6   2   10.50    3.70
  12  -6  -2    9.10    3.50
  12  -6  -2   10.10    7.50
  12   6  -2   14.30    3.00
  12   6  -2    6.20    4.50
 -12   6   2    1.20    3.30
  12   6  -2   -0.60   12.10
  11  -6  -2  351.06   22.30
  11  -6  -2  381.56   19.10
  11   6  -2  366.76   17.80
  11   6  -2  368.76   23.40
  11   6  -2  322.17   20.30
 -11   6   2  354.76   18.90
  10  -6  -2  312.47   18.40
  10   6  -2  251.37   17.40
   9  -6  -2   83.09    8.20
  -9  -6   2   65.79    8.40
  -9  -6   2   92.09    9.70
   9   6  -2   93.39    8.60
   8  -6  -2  104.19    8.60
  -8  -6   2  104.19    8.10
  -8  -6   2  111.39    9.20
   8   6  -2  106.69   10.40
   8   6  -2  103.89    8.50
  -7  -6   2   58.59    6.00
   7  -6  -2   64.29    6.20
  -7  -6   2   72.89    6.80
   7   6  -2   55.29    7.30
   7   6  -2   56.79    5.80
  -6  -6   2   37.00    4.80
  -6  -6   2   33.90    4.80
   6  -6  -2   33.90    4.90
   6   6  -2   35.40    4.30
   6   6  -2   41.00    5.80
  -5  -6   2  398.86   19.80
   5  -6  -2  390.96   19.20
  -5  -6   2  387.06   18.90
   5   6  -2  394.06   18.20
   5   6  -2  389.16   19.70
   4  -6  -2  167.88    9.10
  -4  -6   2  173.88    9.20
   4   6  -2  143.29    9.30
   4   6  -2  164.78    8.10
  -3  -6   2  298.87   13.60
   3  -6  -2  293.17   13.40
   3   6  -2  257.57   12.20
   3   6  -2  245.48   13.60
  -2  -6   2  208.48   10.50
   2  -6  -2  198.38   10.20
   2   6  -2  216.18   11.00
  -2   6   2  212.18   12.20
  -1  -6   2    9.80    2.10
   1  -6  -2   13.40    2.00
  -1   6   2   11.00    2.80
   1   6  -2   12.50    2.60
   0  -6  -2  572.34   25.60
   0  -6   2  585.64   25.00
   0  -6   2  571.64   26.20
   0   6   2  610.34   25.80
   1  -6   2   11.60    1.80
   1   6   2    9.80    1.30
   1   6   2   13.70    1.40
   2  -6   2  213.88   10.50
  -2  -6  -2  221.28   10.50
  -3  -6  -2  253.37   12.20
   3  -6   2  256.97   12.60
   4  -6   2  159.58    8.90
  -4  -6  -2  163.88    9.30
  -4  -6  -2  158.78    8.50
  -5  -6  -2  395.66   19.30
  -5  -6  -2  367.66   17.80
   5  -6   2  397.76   19.00
  -6  -6  -2   32.10    4.60
   6  -6   2   28.30    4.40
  -6  -6  -2   34.00    3.90
   6   6   2   40.50    4.50
  -7  -6  -2   57.29    6.30
   7  -6   2   52.79    6.00
   7   6   2   67.19    6.20
  -8  -6  -2  115.39    9.70
   8  -6   2  103.99    9.10
   8   6   2  106.39    8.80
   9  -6   2   78.79    8.40
   9   6   2   63.49    8.60
  10  -6   2  263.17   17.10
  11  -6   2  382.86   23.70
  11  -6   2  398.56   19.90
 -11   6  -2  358.96   19.70
  11   6   2  399.16   20.20
  11   6   2  356.16   18.40
  12  -6   2   10.40    3.60
  12  -6   2    6.10    8.10
  12   6   2    5.30    2.40
 -12   6  -2   -2.50    3.80
  12   6   2    7.80    4.00
  13  -6   2   13.90    3.60
  13   6   2   17.50    3.10
 -13   6  -2   16.80    4.70
  13   6   2    6.80    4.10
 -14   6  -2    2.70    3.70
  14   6   2    2.60    3.70
  14   6   2    4.80    2.10
 -15   6  -2   -1.50    3.30
  15   6   2    3.90    4.60
 -16   6  -2   22.50    4.60
 -17   6  -2   11.80    3.90
 -17   7   2    1.60    2.40
 -16   7   2   41.60    5.20
  15  -7  -2    9.80    2.90
  15   7  -2    6.60    2.00
 -15   7   2    4.10    2.90
  14  -7  -2    9.30    3.10
 -14   7   2    2.00    3.10
  14   7  -2    5.50    2.10
  13  -7  -2  118.09    9.00
  13   7  -2  123.59    7.70
 -13   7   2  113.99    8.80
  13   7  -2   87.49    9.50
  12  -7  -2  138.29   10.10
  12  -7  -2  129.09   14.40
  12   7  -2  127.89   10.40
  12   7  -2  134.49    8.60
 -12   7   2  149.19    9.90
  11  -7  -2  169.38   14.80
  11  -7  -2  175.28   11.60
  11   7  -2  158.68    9.70
 -11   7   2  164.88   10.90
  11   7  -2  171.48   11.70
  10  -7  -2   92.89   10.50
  10   7  -2   84.99   11.60
   9  -7  -2  153.08   11.60
  -9  -7   2  162.88   12.40
  -9  -7   2  132.79   13.00
   9   7  -2  180.18   12.10
  -8  -7   2   25.00    5.80
   8  -7  -2   27.90    5.00
  -8  -7   2   26.50    5.00
   8   7  -2   31.80    5.10
   8   7  -2   17.20    5.20
  -7  -7   2  255.47   13.80
   7  -7  -2  251.97   14.60
  -7  -7   2  256.57   15.20
   7   7  -2  258.07   13.60
   7   7  -2  251.07   15.20
  -6  -7   2  652.53   30.10
   6  -7  -2  662.83   30.60
  -6  -7   2  671.33   31.40
   6   7  -2  624.34   30.90
   6   7  -2  627.04   29.30
  -5  -7   2   34.70    4.80
   5  -7  -2   35.00    4.40
  -5  -7   2   39.70    4.70
   5   7  -2   46.30    5.40
   5   7  -2   45.70    3.90
   4  -7  -2 1137.09   49.99
  -4  -7   2 1152.58   50.19
   4   7  -2 1105.09   50.29
  -3  -7   2   25.90    3.30
   3  -7  -2   27.90    3.30
   3   7  -2   28.70    4.00
  -2  -7   2  657.73   29.00
   2  -7  -2  664.33   28.50
   2   7  -2  631.04   29.10
  -2   7   2  599.54   29.80
  -1  -7   2   44.70    3.80
   1  -7  -2   43.10    3.30
  -1   7   2   41.20    4.70
   1   7  -2   50.49    4.60
   0  -7  -2  244.28   11.80
   0  -7   2  256.27   11.20
   0  -7   2  253.07   12.60
   0   7   2  267.97   12.30
  -1  -7  -2   38.30    2.90
   1  -7   2   39.00    3.00
   1   7   2   44.80    2.80
   1   7   2   45.30    2.70
  -2  -7  -2  631.14   27.70
   2  -7   2  605.94   27.40
   3  -7   2   24.60    3.40
  -3  -7  -2   31.90    3.20
   4  -7   2 1116.79   49.00
  -4  -7  -2 1109.89   48.50
  -4  -7  -2 1094.49   49.50
  -5  -7  -2   36.00    4.60
   5  -7   2   43.80    4.70
  -5  -7  -2   38.50    4.40
  -6  -7  -2  633.64   30.20
   6  -7   2  642.84   29.80
  -6  -7  -2  601.14   28.20
  -7  -7  -2  251.87   15.00
   7  -7   2  262.07   14.80
  -8  -7  -2   29.10    5.50
   8  -7   2   23.50    4.80
   9  -7   2  172.08   12.60
  10  -7   2   93.19   10.20
  11  -7   2  179.58   11.20
  11  -7   2  154.68   15.70
  11   7   2  161.48    9.70
 -11   7  -2  169.18   11.30
  11   7   2  168.68   11.60
  12  -7   2  171.58   16.00
  12  -7   2  137.09    9.90
  12   7   2  140.19    8.50
 -12   7  -2  132.29   10.40
  12   7   2  137.99   10.40
  13  -7   2  120.09    8.70
  13   7   2  111.79    9.00
  13   7   2  118.99    7.50
 -13   7  -2  107.09    9.10
  14   7   2    4.10    3.50
 -14   7  -2    3.10    3.40
 -15   7  -2    7.50    3.30
  15   7   2    3.50    3.60
 -16   7  -2   25.10    4.30
 -17   7  -2   -1.40    2.90
 -17   8   2   24.70    4.10
 -16   8   2   -0.10    2.30
  15   8  -2    3.20    1.70
 -15   8   2    2.90    2.80
  14   8  -2   11.60    4.10
  14   8  -2   13.90    2.60
 -14   8   2   11.30    3.20
  13  -8  -2    3.40    3.00
 -13   8   2    2.30    2.90
  13   8  -2    0.90    2.00
  13   8  -2    0.40    3.70
  12  -8  -2  144.09   16.50
  12  -8  -2  143.69   10.60
 -12   8   2  131.19    9.70
  12   8  -2  147.49    8.60
  12   8  -2  127.59   10.30
  11  -8  -2  320.07   20.40
  11  -8  -2  321.87   17.20
  11   8  -2  311.77   15.60
  11   8  -2  293.57   17.00
 -11   8   2  309.87   16.80
 -10  -8   2  237.28   16.90
  10  -8  -2  234.08   16.00
  10   8  -2  187.08   11.30
 -10   8   2  219.98   12.70
  -9  -8   2  291.17   18.50
   9  -8  -2  269.07   17.30
  -8  -8   2  109.09    9.30
  -8  -8   2  116.59   10.50
   8  -8  -2  121.39    9.90
   8   8  -2  112.69   10.40
   8   8  -2  115.19    9.30
   7  -8  -2   31.80    5.40
  -7  -8   2   44.70    5.90
  -7  -8   2   38.50    5.90
   7   8  -2   33.00    5.60
   7   8  -2   38.00    6.50
  -6  -8   2  253.77   14.70
  -6  -8   2  227.38   13.30
   6  -8  -2  239.58   13.80
   6   8  -2  251.17   14.10
  -5  -8   2  410.26   20.70
   5  -8  -2  391.86   19.70
  -5  -8   2  408.16   19.90
   5   8  -2  390.36   20.00
   4  -8  -2 1450.15   63.99
  -4  -8   2 1489.75   64.29
   4   8  -2 1441.56   64.19
   3  -8  -2 1137.99   50.29
  -3  -8   2 1147.49   50.69
   3   8  -2 1200.88   50.79
  -3   8   2 1083.29   53.39
   2  -8  -2  902.31   39.30
  -2  -8   2  872.51   39.80
   2   8  -2  904.61   40.00
  -2   8   2  885.61   40.80
   1  -8  -2  357.26   16.80
  -1  -8   2  353.66   17.50
  -1   8   2  369.86   18.00
   1   8  -2  388.56   18.20
   0  -8   2  157.98    8.60
   0  -8   2  151.48    7.00
   0  -8  -2  152.18    7.70
   0   8   2  156.88    8.30
  -1  -8  -2  324.27   15.70
   1  -8   2  318.17   15.60
   1   8   2  368.66   15.60
   1   8   2  381.36   15.60
  -2  -8  -2  906.11   38.70
   2  -8   2  838.02   38.20
  -3  -8  -2 1131.99   50.69
   3  -8   2 1181.78   50.79
   4  -8   2 1434.96   61.89
  -4  -8  -2 1381.96   61.39
  -5  -8  -2  445.36   21.70
   5  -8   2  432.16   21.00
  -5  -8  -2  402.46   20.10
  -6  -8  -2  222.88   12.50
  -6  -8  -2  250.87   14.20
   6  -8   2  241.78   13.50
  -7  -8  -2   31.00    4.40
   7  -8   2   37.30    5.80
  -7  -8  -2   31.10    5.50
   8  -8   2  116.09    9.50
  -8  -8  -2  112.19    9.90
   9  -8   2  249.68   16.40
  -9  -8  -2  286.27   18.10
  10  -8   2  208.68   15.60
  10   8   2  213.58   13.70
 -10   8  -2  216.98   14.80
  11  -8   2  332.57   21.80
  11  -8   2  312.27   17.30
 -11   8  -2  308.37   17.20
  11   8   2  297.07   15.40
  11   8   2  322.37   17.40
  12  -8   2  131.19    9.80
  12  -8   2  148.09   17.10
  12   8   2  137.69   10.50
  12   8   2  151.08    8.60
 -12   8  -2  135.69   10.20
  13   8   2   -0.40    1.90
 -13   8  -2   -0.10    3.10
  13   8   2    6.60    3.60
 -14   8  -2    9.60    3.40
  15   8   2    1.00    3.20
 -15   8  -2    1.80    2.80
 -16   8  -2    6.60    3.00
 -17   8  -2   17.00    3.00
 -17   9   2    4.30    2.30
 -16   9   2   21.50    3.40
 -15   9   2   21.20    3.40
 -14   9   2   -1.60    2.60
  14   9  -2    3.50    3.60
  14   9  -2    0.60    1.80
  13  -9  -2   21.00    4.30
 -13   9   2   16.70    3.70
  13   9  -2   18.80    2.90
  13   9  -2   13.80    4.00
  12  -9  -2   19.30    4.50
  12  -9  -2    3.00    9.40
  12   9  -2   11.90    2.60
 -12   9   2   10.40    3.40
  12   9  -2    3.50    3.80
  11  -9  -2  370.76   22.90
  11  -9  -2  304.17   18.80
  11   9  -2  333.77   18.50
  11   9  -2  346.97   16.90
 -11   9   2  370.96   18.30
  10  -9  -2  139.49   13.40
  10  -9  -2  125.49   13.20
 -10  -9   2  148.99   14.70
  10   9  -2  127.79   10.00
  10   9  -2  138.29    8.40
 -10   9   2  147.59    9.70
   9  -9  -2  266.17   16.90
  -9  -9   2  288.07   18.40
  -8  -9   2   39.70    6.70
   8  -9  -2   51.09    6.70
  -8  -9   2   36.60    6.80
   8   9  -2   38.20    6.50
   7  -9  -2   42.90    5.90
  -7  -9   2   46.30    7.30
  -7  -9   2   48.00    7.00
   7   9  -2   47.10    7.00
   6  -9  -2  149.59   10.10
  -6  -9   2  141.79   10.00
  -6  -9   2  163.88   10.90
   6   9  -2  146.29   10.10
  -5  -9   2  343.17   17.10
   5  -9  -2  307.77   16.60
   5   9  -2  313.27   16.70
  -4  -9   2 1246.88   54.59
   4  -9  -2 1203.88   54.19
   4   9  -2 1218.68   54.29
   3  -9  -2 1011.30   42.00
  -3  -9   2  951.00   42.40
   3   9  -2  919.11   42.10
  -3   9   2  875.31   44.40
   2  -9  -2  199.38   10.10
  -2  -9   2  204.68   10.90
  -2   9   2  181.68   12.60
   2   9  -2  187.48   10.80
  -1  -9   2  143.09    8.40
   1  -9  -2  132.39    7.50
   1   9  -2  150.58    9.00
  -1   9   2  144.09    9.20
   0  -9   2   27.40    1.90
   0  -9  -2   30.00    2.80
   0  -9   2   28.30    3.50
   0   9   2   22.10    3.70
  -1  -9  -2  139.39    7.30
   1  -9   2  138.69    7.30
   1   9   2  148.79    7.20
   1   9   2  152.08    7.20
   2  -9   2  169.08    9.10
  -2  -9  -2  171.68    8.60
  -2  -9  -2  189.98    9.80
  -3  -9  -2  935.21   42.00
   3  -9   2  950.10   41.90
   4  -9   2 1227.18   52.49
  -4  -9  -2 1135.89   52.09
  -5  -9  -2  313.57   16.80
   5  -9   2  308.47   16.10
  -5  -9  -2  289.77   15.40
   6  -9   2  141.89   10.00
  -6  -9  -2  141.99   10.50
  -6  -9  -2  154.18    9.50
  -7  -9  -2   39.40    6.30
   7  -9   2   40.90    6.20
  -7  -9  -2   44.30    6.30
   8  -9   2   56.19    8.10
  -8  -9  -2   47.30    7.60
  -9  -9  -2  251.27   17.00
   9  -9   2  251.07   17.00
  10  -9   2  132.49   13.70
  10  -9   2  153.98   10.40
  10   9   2  136.89   10.00
 -10   9  -2  126.59    9.50
  10   9   2  127.59    8.80
  11  -9   2  351.86   22.40
  11  -9   2  347.57   18.50
 -11   9  -2  316.87   18.00
  11   9   2  321.67   16.20
  11   9   2  347.17   18.30
  12  -9   2   18.50   10.60
  12   9   2   11.20    2.60
  12   9   2   11.00    3.70
 -12   9  -2   13.10    3.80
 -13   9  -2   23.20    4.30
  13   9   2   20.10    4.30
  14   9   2    2.00    2.90
 -14   9  -2    3.00    3.00
 -15   9  -2   26.80    4.10
  15   9   2   32.50    5.20
 -16   9  -2   16.40    3.40
 -17   9  -2    3.40    2.30
 -16  10   2   13.70    2.70
 -15  10   2    2.90    2.30
  15  10  -2    3.30    4.50
  14  10  -2   -0.80    3.30
 -14  10   2    1.70    2.70
  14  10  -2    4.10    1.80
  13 -10  -2    7.50    3.20
  13  10  -2    2.60    3.30
  13  10  -2    9.30    2.20
 -13  10   2    3.70    2.80
  12 -10  -2  147.39   10.90
  12  10  -2  147.59    8.50
  12  10  -2  137.09   10.30
 -12  10   2  147.79   10.10
  11 -10  -2   23.90    9.00
  11 -10  -2   13.80    5.10
  11  10  -2   32.10    4.30
  11  10  -2   21.70    4.60
 -11  10   2   39.20    5.40
  10 -10  -2   16.10    5.20
  10 -10  -2    7.50    6.50
 -10 -10   2   10.00    7.80
  10  10  -2    6.30    3.70
  10  10  -2    7.20    2.60
 -10  10   2    7.60    3.20
  -9 -10   2   18.70    7.30
   9 -10  -2   21.00    5.90
  -9  10   2   17.50    5.70
  -8 -10   2   22.70    6.80
  -8 -10   2   19.00    6.30
   8 -10  -2   24.30    5.50
  -7 -10   2   92.09    9.10
   7 -10  -2   88.59    8.20
  -7 -10   2   92.69    9.10
   7  10  -2   90.59    8.30
  -6 -10   2  189.48   12.10
   6 -10  -2  178.28   11.50
  -6 -10   2  203.78   13.30
   6  10  -2  185.78   11.70
   5 -10  -2   72.09    6.30
  -5 -10   2   72.19    7.10
   5  10  -2   67.29    6.50
   4 -10  -2  690.13   31.40
  -4 -10   2  669.03   31.80
   4  10  -2  671.33   31.30
   3 -10  -2   18.00    3.30
  -3 -10   2   21.00    3.90
  -3  10   2   20.00    7.90
  -2 -10   2  304.57   15.50
   2 -10  -2  293.37   14.60
   2  10  -2  315.77   15.50
  -2  10   2  272.27   16.90
   1 -10  -2   20.10    3.00
  -1 -10   2   18.40    3.30
   1  10  -2   18.70    3.80
  -1  10   2   21.20    4.20
   0 -10   2   62.09    5.40
   0 -10  -2   61.79    4.30
   0  10   2   68.89    5.50
   1 -10   2   22.60    2.90
   1  10   2   15.40    2.40
   1  10   2   14.50    2.10
  -2 -10  -2  275.27   14.00
   2 -10   2  265.07   13.30
  -2 -10  -2  280.07   12.70
   3 -10   2   26.90    4.30
  -3 -10  -2   28.90    3.30
  -3 -10  -2   36.20    4.50
  -4 -10  -2  657.33   31.10
   4 -10   2  688.83   31.20
   5 -10   2   50.39    6.10
  -5 -10  -2   65.39    6.60
  -5 -10  -2   65.39    6.40
   6 -10   2  187.28   12.00
  -6 -10  -2  185.78   11.50
  -6 -10  -2  192.48   12.50
   7 -10   2   85.89    8.10
  -7 -10  -2   91.29    9.10
  -7 -10  -2   62.39    7.90
  -8 -10  -2   20.70    5.90
   8 -10   2   13.30    5.70
  -9 -10  -2   26.20    7.60
   9 -10   2   26.50    7.00
  10 -10   2   12.90    7.80
  10 -10   2    7.90    4.60
  10  10   2    6.10    3.80
  10  10   2   12.00    2.90
 -10  10  -2   11.10    3.80
  11 -10   2   21.50    9.50
  11  10   2   30.00    4.40
 -11  10  -2   27.10    4.50
  11  10   2   36.60    6.30
 -12  10  -2  131.59    9.80
  12  10   2  145.19    7.80
  12  10   2  132.69   10.10
 -13  10  -2    4.10    3.20
  13  10   2    9.20    3.50
  14  10   2    1.50    3.00
 -14  10  -2    1.90    2.70
  15  10   2    4.50    2.80
 -15  10  -2    7.90    2.90
 -16  10  -2   15.30    3.00
 -16  11   2   45.10    4.80
  15  11  -2    6.70    3.20
 -15  11   2    7.80    2.50
  14  11  -2   43.00    6.10
 -14  11   2   33.50    5.00
  13  11  -2    6.00    2.00
  13  11  -2    1.80    3.20
 -13  11   2    4.00    2.60
 -13  11   2   -0.40    4.70
  12 -11  -2   96.49    8.50
  12  11  -2   87.39    5.80
  12  11  -2   77.79    7.90
 -12  11   2   73.29    7.20
  11 -11  -2    5.50    4.80
  11 -11  -2   13.80    9.40
 -11  11   2   13.10    3.30
  11  11  -2   18.90    4.40
  11  11  -2   19.80    2.80
  10 -11  -2   44.20    7.00
 -10 -11   2   36.00   10.10
  10 -11  -2   47.80    9.00
 -10  11   2   34.50    5.30
  10  11  -2   37.30    6.20
  10  11  -2   44.00    4.70
   9 -11  -2  176.48   14.00
  -9 -11   2  173.88   15.80
   9  11  -2  166.58   11.10
  -9  11   2  160.38   10.30
   9  11  -2  171.48   11.10
   8 -11  -2  141.69   12.20
  -8 -11   2  156.38   13.70
  -8 -11   2  154.18   13.50
   7 -11  -2   70.59    8.60
  -7 -11   2   76.79    8.90
  -7 -11   2   70.79    8.80
   7  11  -2   94.89    8.20
  -6 -11   2  198.58   13.50
   6 -11  -2  183.88   12.00
  -6 -11   2  187.68   12.40
   6  11  -2  161.68   11.10
  -5 -11   2  416.16   21.20
   5 -11  -2  407.46   20.60
   5  11  -2  393.86   20.10
  -4 -11   2  353.56   18.00
   4 -11  -2  327.17   17.20
   4  11  -2  326.67   17.00
   3 -11  -2  100.29    7.00
  -3 -11   2  104.79    7.50
   3  11  -2   85.29    7.00
  -3  11   2   81.19   14.00
  -2 -11   2  564.24   28.30
   2 -11  -2  582.24   27.30
   2  11  -2  639.24   28.30
  -2  11   2  599.94   29.60
   1 -11  -2    7.70    2.50
  -1 -11   2    8.20    3.00
  -1  11   2   12.90    4.10
   1  11  -2   10.00    3.40
   0 -11  -2  452.95   22.20
   0 -11   2  496.75   24.00
   0  11  -2  537.25   24.80
   0  11   2  499.25   23.00
   1 -11   2    9.20    2.90
  -1 -11  -2    9.50    2.20
   1 -11   2    7.60    2.10
   1  11   2    9.00    1.70
   1  11   2   11.10    2.00
  -2 -11  -2  556.04   25.70
  -2 -11  -2  628.94   27.80
   2 -11   2  578.54   26.50
   3 -11   2   96.29    6.70
  -3 -11  -2  100.49    5.80
  -3 -11  -2   96.09    7.30
   4 -11   2  305.07   16.20
  -4 -11  -2  324.37   16.60
  -5 -11  -2  407.26   20.60
   5 -11   2  396.56   20.60
  -5 -11  -2  402.86   21.50
  -6 -11  -2  180.58   12.20
  -6 -11  -2  166.18   11.70
   6 -11   2  158.08   11.40
  -7 -11  -2   87.19    9.90
   7 -11   2   86.79    9.30
   8 -11   2  118.49   11.70
  -8 -11  -2  148.19   13.00
  -9 -11  -2  181.58   15.60
   9 -11   2  161.08   14.70
   9  11   2  173.28   14.30
   9  11   2  170.28   11.20
  -9  11  -2  174.68   10.80
  10 -11   2   31.60    9.60
  10  11   2   57.19    7.20
 -10  11  -2   58.49    6.60
  11 -11   2   21.40   10.20
 -11  11  -2    8.60    3.50
  11  11   2   12.30    4.10
  12  11   2   81.79    8.10
 -12  11  -2   90.29    7.90
  13  11   2    2.40    3.00
 -13  11  -2   -2.90    2.70
  14  11   2   36.60    5.70
 -14  11  -2   38.70    5.40
  15  11   2    8.70    2.90
 -15  11  -2    9.20    2.80
  16  11   2   42.70    4.70
 -16  11  -2   48.20    4.70
 -16  12   2    8.50    2.30
  15  12  -2   41.70    5.40
 -15  12   2   45.60    4.70
 -14  12   2   16.90    3.10
  14  12  -2   14.90    3.60
  13  12  -2   15.00    3.60
 -13  12   2   16.80    3.50
 -12  12   2   52.09    5.80
  12  12  -2   51.59    4.40
 -12  12   2   34.70    6.10
  12  12  -2   46.30    6.50
  11 -12  -2   79.59   12.90
  11 -12  -2   87.49    8.80
 -11  12   2   81.89    7.00
  11  12  -2   65.19    7.30
  11  12  -2   85.19    5.70
 -11  12   2   72.59    7.40
  10 -12  -2  361.26   22.80
  10 -12  -2  317.17   19.00
 -10 -12   2  400.36   25.30
 -10  12   2  326.97   17.40
  10  12  -2  330.27   18.00
  10  12  -2  306.97   15.90
   9 -12  -2  508.85   29.10
   9  12  -2  560.74   26.30
   9  12  -2  547.75   26.50
   9  12  -2  490.25   24.10
  -9  12   2  549.35   25.70
  -8 -12   2   59.09    9.80
  -8 -12   2   36.70    8.70
   8 -12  -2   56.09    9.10
  -8  12   2   68.29    6.30
  -7 -12   2    3.20    5.40
  -7 -12   2   -2.70    5.90
   7 -12  -2   -0.20    4.60
  -6 -12   2    5.00    4.40
  -6 -12   2    8.40    4.90
   6 -12  -2    5.20    4.40
   6  12  -2    2.50    3.30
   5 -12  -2  390.76   19.60
  -5 -12   2  416.56   20.60
   5  12  -2  325.17   18.40
   4 -12  -2   25.90    4.50
  -4 -12   2   23.80    4.90
   4  12  -2   23.40    3.90
   3 -12  -2  209.68   12.20
  -3 -12   2  240.98   13.30
   3  12  -2  228.68   12.40
  -3  12   2  209.68   17.70
   2 -12  -2  269.57   13.60
  -2 -12   2  286.37   14.90
  -2  12   2  231.08   16.40
   2  12  -2  261.07   14.30
   1 -12  -2   24.00    3.50
  -1 -12   2   22.10    4.20
   1  12  -2   28.00    4.70
  -1  12   2   32.20    5.30
   0 -12   2   74.79    6.50
   0 -12  -2   73.39    5.40
   0  12  -2   75.69    7.40
   0  12   2   79.59    6.30
   0  12   2   72.59    5.80
   1 -12   2   22.70    3.80
  -1 -12  -2   27.30    4.30
  -1 -12  -2   34.50    3.80
   1 -12   2   27.20    4.50
   1  12   2   31.70    2.90
   1  12   2   28.60    2.70
   2 -12   2  265.87   13.60
  -2 -12  -2  284.87   14.90
  -3 -12  -2  231.68   13.00
   3 -12   2  214.18   12.10
  -4 -12  -2   26.10    4.80
   4 -12   2   23.80    4.30
   5 -12   2  347.67   18.50
  -5 -12  -2  348.67   18.90
  -5 -12  -2  338.77   19.40
  -6 -12  -2    8.90    4.70
   6 -12   2   -1.60    4.20
  -6 -12  -2    1.40    5.30
  -7 -12  -2    3.60    5.60
   7 -12   2   -3.80    4.80
  -8 -12  -2   71.49   10.80
   8 -12   2   59.69   10.10
   8  12   2   46.80    8.30
  -8  12  -2   73.19    7.80
   9 -12   2  511.15   29.60
  -9 -12  -2  607.74   31.60
   9  12   2  517.65   26.30
  -9  12  -2  528.85   26.10
   9  12   2  523.65   26.50
 -10 -12  -2  331.77   24.80
  10 -12   2  302.07   23.50
  10  12   2  372.76   19.20
 -10  12  -2  360.66   18.70
  10  12   2  381.16   19.20
  11 -12   2   50.79   12.50
  11  12   2   78.79    7.80
 -11  12  -2   75.19    7.20
  12  12   2   59.69    6.70
 -12  12  -2   49.80    6.10
 -13  12  -2   14.00    3.50
  13  12   2   12.90    3.50
 -14  12  -2   17.30    3.30
  14  12   2   20.30    3.70
 -15  12  -2   36.40    4.80
  15  12   2   37.20    4.60
  16  12   2    5.50    2.50
 -16  12  -2    6.40    1.90
 -16  13   2    5.10    1.80
 -15  13   2    0.40    1.90
  15  13  -2    5.10    2.80
  14  13  -2   11.20    3.10
 -14  13   2   16.00    3.10
  13  13  -2   72.69    7.00
 -12  13   2    7.60    2.80
 -12  13   2    8.30    3.60
  12  13  -2    8.40    3.40
  11  13  -2   29.60    4.60
 -11  13   2   17.90    4.30
 -11  13   2   30.80    5.00
  10 -13  -2   25.20   10.00
 -10 -13   2   37.70   10.50
  10  13  -2   40.30    6.30
 -10  13   2   44.80    5.50
 -10  13   2   43.70    6.10
  10  13  -2   26.90    4.40
   9 -13  -2   66.69   10.50
  -9 -13   2   95.89   14.10
   9  13  -2   63.19    7.10
   9  13  -2   63.19    5.40
  -9  13   2   62.59    6.20
   9  13  -2   71.29    7.60
  -9  13   2   45.40    6.80
  -8 -13   2  126.79   12.70
   8 -13  -2  123.49   12.30
   8  13  -2  106.19    9.20
   8  13  -2  114.89    8.80
  -8  13   2  105.09    8.00
  -7 -13   2   11.00    7.40
   7 -13  -2   10.20    5.60
  -7 -13   2    3.30    5.60
   6 -13  -2   79.09    9.00
  -6 -13   2   91.79   10.10
  -6 -13   2   96.69   10.40
   6  13  -2   74.59    7.00
  -5 -13   2   48.00    7.40
   5 -13  -2   41.70    7.00
   5  13  -2   45.60    5.40
  -4 -13   2  388.06   20.60
   4 -13  -2  399.36   19.60
   4  13  -2  348.37   18.40
  -3 -13   2  423.66   21.90
   3 -13  -2  410.86   20.60
   3  13  -2  416.76   20.40
   2 -13  -2   61.89    6.00
  -2 -13   2   42.40    5.90
  -2  13   2   72.99   10.50
   2  13  -2   58.59    6.00
  -1 -13   2   67.39    6.40
   1 -13  -2   50.19    5.60
  -1  13   2   53.49    7.90
   1  13  -2   51.79    6.60
   0 -13   2  436.16   21.50
   0 -13  -2  372.16   19.00
   0  13   2  433.56   19.80
   0  13  -2  431.56   21.80
   0  13   2  392.36   19.60
  -1 -13  -2   58.89    6.00
   1 -13   2   52.29    6.10
   2 -13   2   54.39    5.80
  -2 -13  -2   52.09    6.30
   2 -13   2   54.19    6.20
  -3 -13  -2  404.86   20.70
   3 -13   2  385.56   19.50
  -4 -13  -2  390.46   20.00
   4 -13   2  349.87   19.00
   5 -13   2   41.20    6.30
  -5 -13  -2   49.10    7.20
  -5 -13  -2   40.00    6.60
   6 -13   2   71.09    9.30
  -6 -13  -2   80.39   10.80
  -6 -13  -2   88.59   10.10
   7 -13   2    2.70    6.10
  -7 -13  -2   -0.80    5.30
   8 -13   2   97.79   12.50
  -8 -13  -2  103.89   12.20
   8  13   2  109.59    9.40
  -8  13  -2  124.09    8.60
   8  13   2  107.69    8.80
   9 -13   2   66.89   11.20
  -9 -13  -2   53.69   10.30
  -9  13  -2   61.79    6.70
   9  13   2   73.69    7.60
   9  13   2   73.39    6.80
 -10 -13  -2   32.90   11.90
  10 -13   2   51.89   12.00
  10 -13   2   47.30   12.50
  10  13   2   49.20    6.70
  10  13   2   46.90    6.40
 -10  13  -2   41.10    5.90
 -11  13  -2   21.90    3.70
  11  13   2   23.50    4.30
  12  13   2    0.90    3.00
 -12  13  -2    5.20    2.90
  13  13   2   73.49    7.20
 -13  13  -2   77.89    6.80
 -14  13  -2   13.40    3.00
  14  13   2   13.20    3.20
  15  13   2   -1.50    2.10
 -15  13  -2   -2.10    1.90
 -16  13  -2    6.80    2.00
  16  13   2    7.80    2.90
  15  14  -2   34.40    4.20
 -15  14   2   27.70    4.00
  14  14  -2   17.80    3.40
 -14  14   2   14.50    2.80
 -13  14   2   18.00    3.30
  13  14  -2   15.30    3.70
 -12  14   2   41.00    5.10
 -12  14   2   27.30    4.30
  12  14  -2   37.40    5.90
  11  14  -2   -3.30    2.60
 -11  14   2   -0.60    2.40
 -11  14   2    4.40    3.30
 -10 -14   2    0.40   11.00
  10 -14  -2    9.40   10.70
  10  14  -2    9.20    3.40
 -10  14   2   19.50    4.00
  10  14  -2   13.20    3.80
 -10  14   2   12.40    3.30
  -9 -14   2  100.49   14.10
   9 -14  -2   88.69   14.30
  -9  14   2   74.09    7.50
  -9  14   2   81.29    7.00
   9  14  -2   70.59    7.20
   9  14  -2   83.39    7.80
   8 -14  -2   17.20    7.80
  -8 -14   2   13.20    7.40
   8  14  -2    7.90    3.30
   8  14  -2    2.90    3.20
  -8  14   2    4.20    2.60
  -8  14   2    3.10    3.50
  -7 -14   2   94.99   11.30
  -7 -14   2   94.69   13.70
   7 -14  -2   81.29   10.80
   7  14  -2   93.29    8.30
  -7  14   2   83.79    6.70
   7  14  -2   86.19    7.60
  -7  14   2   81.69    7.50
  -6 -14   2   37.30    8.10
  -6 -14   2   52.99    8.50
   6 -14  -2   35.30    7.20
  -5 -14   2  116.29   11.10
   5 -14  -2  128.59   10.60
   5  14  -2  130.09    7.90
  -4 -14   2   17.90    5.30
   4 -14  -2   26.70    5.30
   4  14  -2   18.00    3.60
   3 -14  -2    9.90    4.40
  -3 -14   2   23.50    4.90
   3  14  -2   16.60    3.50
  -3  14   2   14.50   10.10
   2 -14  -2    1.60    3.70
  -2 -14   2   -0.20    3.40
  -2  14   2   -3.50    6.70
   2  14  -2    1.80    3.10
  -1 -14   2   88.79    8.90
   1 -14  -2   90.49    7.50
   1  14  -2  112.79    8.80
  -1  14   2  111.09    9.70
   0 -14   2    0.00    3.10
   0  14   2   -0.90    2.50
   0  14   2    1.00    3.00
   0  14  -2   -5.60    3.70
  -1 -14  -2  115.49    9.30
   1 -14   2  118.69    9.20
  -1  14  -2   98.39    9.90
  -2 -14  -2   -5.10    3.70
   2 -14   2    0.80    3.50
  -3 -14  -2   17.40    5.20
   3 -14   2   12.20    4.50
   3 -14   2   15.10    4.60
   4 -14   2   19.60    5.30
  -4 -14  -2   18.50    5.50
  -5 -14  -2  119.49   11.10
   5 -14   2  127.89   11.20
  -5 -14  -2  141.69   12.10
  -6 -14  -2   46.30    8.10
   6 -14   2   42.00    7.80
  -6 -14  -2   32.90    8.40
   7 -14   2   90.49   11.80
  -7 -14  -2   88.19   11.70
   7  14   2   87.19    7.70
   7  14   2   84.99    8.10
  -7  14  -2   76.79    6.80
   8 -14   2    3.10    8.10
  -8 -14  -2    7.40    7.20
   8  14   2    8.10    3.70
   8  14   2    9.20    4.10
  -8  14  -2    5.90    3.30
   9 -14   2   68.79   12.00
  -9 -14  -2   71.89   12.60
   9 -14   2   86.99   13.00
   9  14   2   83.49    8.00
  -9  14  -2   83.39    7.00
   9  14   2   75.09    7.60
  10 -14   2    3.30   11.90
  10 -14   2   22.10   12.50
 -10 -14  -2   23.90   12.70
  10  14   2   18.50    4.10
  10  14   2   12.40    3.70
 -10  14  -2   18.30    3.60
  11  14   2    6.40    2.90
 -11  14  -2   -1.90    2.40
 -12  14  -2   45.80    5.50
  12  14   2   37.80    6.00
 -13  14  -2   19.60    3.50
  13  14   2   13.30    3.30
 -14  14  -2   12.60    2.90
  14  14   2    9.70    2.80
  15  14   2   35.50    4.10
 -15  14  -2   34.00    4.10
 -15  15   2   53.69    4.30
  15  15  -2   45.60    4.40
 -14  15   2    4.80    2.20
  14  15  -2    3.80    2.70
  13  15  -2   10.30    3.00
 -13  15   2    8.90    2.70
  12  15  -2    0.60    2.70
 -12  15   2    5.70    2.40
 -12  15   2    4.00    3.20
 -11  15   2   85.09    7.00
  11  15  -2   85.99    7.70
 -11  15   2   83.49    7.80
  10  15  -2   23.40    4.60
 -10  15   2   17.10    4.10
  10  15  -2   25.10    4.40
 -10  15   2   21.50    3.80
   9 -15  -2   20.90   11.10
  -9 -15   2   16.20    9.90
   9  15  -2   15.90    3.90
   9  15  -2    3.40    3.40
  -9  15   2    8.50    3.60
  -9  15   2    9.60    3.00
   8 -15  -2   29.30    9.70
  -8 -15   2   32.60    9.40
  -8  15   2   34.30    5.10
  -8  15   2   39.80    5.00
   8  15  -2   47.40    6.10
   8  15  -2   40.70    6.30
   7 -15  -2   84.69   13.60
  -7 -15   2  124.49   16.70
  -7 -15   2  115.59   12.90
  -7  15   2  106.89    8.40
  -7  15   2  108.29    7.70
   7  15  -2  106.49    8.50
   7  15  -2  102.49    8.90
  -6 -15   2   28.00    8.00
  -6 -15   2   10.40    8.20
   6 -15  -2   10.30    6.70
   6  15  -2   11.80    3.30
  -6  15   2   10.80    3.20
  -6  15   2   13.00    3.10
   6  15  -2   14.50    4.00
   5 -15  -2   24.40    6.50
  -5 -15   2   21.40    6.70
   4 -15  -2  121.39   11.70
  -4 -15   2  125.29   12.00
   4  15  -2  137.19    7.30
  -3 -15   2   19.10    5.50
   3 -15  -2   24.10    5.40
   3  15  -2   15.60    3.40
  -2 -15   2    6.50    4.20
   2 -15  -2   10.30    4.60
  -2  15   2    3.20    7.10
   2  15  -2    7.80    3.50
  -1 -15   2  193.48   12.90
  -1  15   2  192.08   11.80
   1  15  -2  177.68   11.90
  -1  15   2  182.58   12.60
   0 -15  -2  795.72   39.20
   0 -15   2  805.82   39.60
   0  15  -2  826.22   39.10
   0  15   2  835.92   36.10
   0  15   2  811.32   36.00
   1 -15   2  183.88   12.80
  -1 -15  -2  179.78   12.80
  -1  15  -2  183.68   13.20
  -2 -15  -2   11.00    5.00
   2 -15   2    5.70    4.30
  -3 -15  -2   19.70    5.60
   3 -15   2   17.40    5.80
  -4 -15  -2  148.69   12.00
   4 -15   2  135.79   11.70
  -5 -15  -2    9.90    6.10
  -5 -15  -2   26.70    7.30
   5 -15   2   21.00    6.30
   5 -15   2   17.50    7.10
  -6 -15  -2   10.30    7.20
  -6 -15  -2   16.30    8.80
   6 -15   2    9.40    8.00
   6 -15   2   19.50    6.70
   6  15   2   13.80    4.20
  -6  15  -2   13.10    3.40
   6  15   2   12.00    3.60
   7 -15   2  126.69   14.00
   7 -15   2   92.79   15.60
  -7 -15  -2   81.79   13.10
   7  15   2  113.39    9.00
  -7  15  -2  113.49    8.30
   7  15   2  116.39    8.50
   8 -15   2   27.90   11.50
  -8 -15  -2   30.20   10.00
   8 -15   2   43.40   10.30
   8  15   2   40.90    6.70
  -8  15  -2   34.80    5.40
   8  15   2   46.90    6.20
  -9 -15  -2   15.80   11.00
   9 -15   2   16.90   12.60
   9 -15   2   31.90   11.30
   9  15   2   16.80    4.00
   9  15   2   12.20    3.90
 -10  15  -2   23.50    4.00
  10  15   2   34.00    5.50
  10  15   2   19.60    4.30
  11  15   2   84.59    8.00
 -11  15  -2   85.19    7.30
  12  15   2    0.30    2.70
 -12  15  -2    2.40    2.60
 -13  15  -2   12.20    2.80
  13  15   2   16.20    3.30
  14  15   2    3.90    2.40
 -14  15  -2    4.40    2.10
 -15  15  -2   58.79    4.70
  15  15   2   49.90    4.50
  15  16  -2   18.70    3.30
 -15  16   2   28.40    3.00
  14  16  -2   14.70    2.90
 -14  16   2   10.60    2.40
 -13  16   2    8.30    2.50
  13  16  -2   15.80    3.10
  12  16  -2   11.50    3.30
 -12  16   2   10.00    2.70
 -12  16   2    8.90    3.70
 -11  16   2   10.90    2.90
  11  16  -2   11.60    3.50
 -11  16   2   18.50    3.80
  10  16  -2    2.30    3.00
  10  16  -2    5.20    3.30
 -10  16   2    6.40    3.40
 -10  16   2    4.50    2.40
   9 -16  -2   27.90   20.10
  -9  16   2    6.90    3.40
   9  16  -2    6.10    3.50
   9  16  -2   13.00    3.70
  -9  16   2    6.10    2.80
  -8 -16   2   46.80   12.10
   8 -16  -2   53.29   12.90
   8  16  -2   82.69    7.50
  -8  16   2   84.49    6.80
  -8  16   2   69.99    7.10
   8  16  -2   79.69    7.90
  -7 -16   2   52.19   11.00
   7 -16  -2   47.60   11.00
   7  16  -2   43.50    6.30
  -7  16   2   43.40    5.20
  -7  16   2   38.70    6.10
   7  16  -2   59.59    7.10
  -6 -16   2    5.80    6.90
  -6 -16   2    2.30    9.20
   6 -16  -2    7.60    8.70
   6  16  -2    5.50    3.20
  -6  16   2   12.80    2.80
  -6  16   2    6.90    3.50
   6  16  -2    8.90    3.40
  -6  16   2    6.30    3.20
  -5 -16   2   74.39   11.60
   5 -16  -2   69.99    9.60
  -5  16   2   70.29    6.40
  -5  16   2   70.99    6.50
   5  16  -2   72.49    6.70
   5  16  -2   75.39    7.40
   4 -16  -2   11.20    6.80
  -4 -16   2   17.70    7.40
  -3 -16   2    8.10    5.40
  -2 -16   2  341.37   20.30
   2  16  -2  337.47   16.90
   2  16  -2  324.07   17.30
   1 -16  -2  196.28   13.60
  -1 -16   2  195.08   13.80
   1  16  -2  179.88   11.60
  -1  16   2  161.58   11.80
   1  16  -2  155.78   12.80
  -1  16   2  155.28   10.80
   0 -16  -2  164.48   12.60
   0 -16   2  158.38   12.90
   0  16  -2  159.28   12.10
  -1 -16  -2  160.18   12.70
   1 -16   2  181.28   13.40
  -1  16  -2  210.48   14.30
  -2 -16  -2  335.87   20.10
   2 -16   2  341.67   20.30
  -3 -16  -2   31.20    6.90
   3 -16   2   23.80    6.40
   4 -16   2   13.30    6.20
  -4 -16  -2   20.20    6.70
   5 -16   2   75.79   11.70
  -5 -16  -2   88.29   13.30
  -5 -16  -2   68.99   11.50
  -5  16  -2   75.19    6.70
   5  16   2   74.69    7.40
   5  16   2   84.39    7.80
  -6 -16  -2    5.80    7.10
   6 -16   2    9.70    7.60
  -6  16  -2    8.30    3.20
   6  16   2   10.40    3.40
   6  16   2    8.40    3.30
  -6  16  -2   12.50    4.20
  -7 -16  -2   28.40    9.70
   7 -16   2   32.60    9.60
   7  16   2   49.50    6.40
   7  16   2   38.80    6.30
  -7  16  -2   32.40    5.30
   8 -16   2   45.70   10.90
  -8 -16  -2   52.39   12.00
  -8  16  -2   66.39    7.90
   8  16   2   68.89    7.70
  -8  16  -2   77.39    6.40
   8  16   2   75.49    7.20
   9 -16   2   -0.40   18.80
  -9  16  -2    9.20    2.90
   9  16   2   15.80    3.90
   9  16   2    7.00    3.30
  10  16   2    0.80    3.10
 -10  16  -2   -4.80    2.20
  10  16   2    0.10    2.80
  11  16   2   16.70    3.90
 -11  16  -2   16.80    3.60
  12  16   2    9.30    3.00
 -12  16  -2    7.50    2.70
  13  16   2   10.20    2.90
 -13  16  -2   10.00    2.60
  14  16   2   10.60    2.60
 -14  16  -2   10.70    2.40
  15  16   2   18.50    2.60
 -15  16  -2   19.20    2.80
  14  17  -2    9.80    2.50
 -14  17   2   12.80    2.30
  13  17  -2   10.40    2.70
 -13  17   2   11.60    2.50
 -12  17   2   44.90    4.90
  12  17  -2   46.90    5.70
 -11  17   2    9.90    2.70
  11  17  -2   12.50    3.30
 -11  17   2   16.00    3.50
 -10  17   2    2.20    2.20
 -10  17   2    3.10    3.10
  10  17  -2    4.00    2.90
   9  17  -2    5.20    3.00
  -9  17   2    0.50    3.30
   9  17  -2    1.30    2.90
  -9  17   2    7.20    2.80
  -8 -17   2   63.39   13.20
  -8  17   2   58.59    6.80
  -8  17   2   53.29    5.80
   8  17  -2   58.39    6.30
   8  17  -2   53.69    6.80
  -7 -17   2  141.79   17.60
   7  17  -2  130.79    9.50
  -7  17   2  131.09    8.70
   7  17  -2  126.89    9.80
  -7  17   2  124.89    9.30
  -6 -17   2  108.29   13.90
  -6 -17   2  110.49   18.60
   6  17  -2  101.19    8.40
  -6  17   2  115.09    8.20
   6  17  -2  105.79    8.90
  -6  17   2   98.79    7.40
  -6  17   2  103.39    8.50
  -5 -17   2   -7.30    8.20
  -5  17   2   10.10    3.30
  -5  17   2    9.00    3.50
  -5  17   2    6.60    2.90
   5  17  -2   12.30    3.60
   5  17  -2    4.60    3.50
  -4 -17   2   66.89   10.60
  -4  17   2   46.00    5.30
   4  17  -2   46.80    6.00
  -4  17   2   48.90    6.30
  -4  17   2   49.99    5.30
   4  17  -2   46.50    6.50
  -3 -17   2   35.90    8.30
   3  17  -2   52.79    6.90
  -3  17   2   48.30    5.30
   2 -17  -2  121.09   12.10
  -2 -17   2  121.59   11.60
   2  17  -2  112.39    6.90
   2  17  -2  111.59    7.40
  -2  17   2  130.09   10.90
   1 -17  -2    2.90    5.40
  -1 -17   2   -2.60    6.00
  -1  17   2    3.00    4.30
   1  17  -2    0.70    3.80
  -1  17   2   -0.50    3.50
   1  17  -2    6.10    5.30
   0 -17   2  132.59   11.60
   0 -17  -2  114.19   11.20
   0  17  -2  120.09   10.80
  -1 -17  -2   10.70    5.80
   1 -17   2    1.80    5.10
  -1  17  -2    9.50    5.80
  -1  17  -2    3.70    9.70
   2 -17   2  134.09   12.10
  -2 -17  -2  106.69   12.00
  -2  17  -2  122.69   12.70
   3 -17   2   37.70    7.60
  -3 -17  -2   45.40    8.50
   3  17   2   29.00    4.90
  -3  17  -2   30.00    4.90
  -4 -17  -2   58.99   10.10
   4 -17   2   48.50    9.20
   4  17   2   39.80    6.50
  -4  17  -2   55.69    5.70
   4  17   2   50.69    6.40
  -5 -17  -2    5.20    7.90
  -5 -17  -2    6.30   10.30
   5 -17   2   -4.70    6.70
  -5  17  -2   10.00    3.90
   5  17   2   11.00    3.70
   5  17   2    9.30    3.40
  -5  17  -2    8.10    3.00
   6 -17   2  101.69   14.30
  -6 -17  -2   91.99   14.60
   6  17   2  113.49    9.00
   6  17   2  103.29    8.60
  -6  17  -2  116.99    7.90
  -6  17  -2   90.29    8.80
  -7 -17  -2  129.39   17.40
   7 -17   2  131.29   17.00
  -7  17  -2  131.89    9.20
  -7  17  -2  129.39   10.00
   7  17   2  137.89    9.70
   7  17   2  134.59   10.20
  -8 -17  -2   66.69   14.40
   8 -17   2   51.69   12.70
  -8  17  -2   61.19    7.40
  -8  17  -2   60.39    6.10
   8  17   2   59.29    6.80
   8  17   2   62.09    7.30
   9  17   2    4.30    2.90
   9  17   2    6.50    3.50
  -9  17  -2    8.00    3.00
  10  17   2    0.00    2.80
  10  17   2    0.20    3.00
 -10  17  -2   -4.80    2.10
  11  17   2   13.60    3.50
 -11  17  -2   16.70    3.40
  12  17   2   47.00    5.40
 -12  17  -2   38.00    4.70
  13  17   2   12.70    2.90
 -13  17  -2    5.90    2.20
 -14  17  -2   13.60    2.40
  14  17   2   11.30    2.50
 -14  18   2    4.80    1.60
  14  18  -2    3.30    2.00
  13  18  -2    6.20    2.30
 -13  18   2    8.80    2.10
 -12  18   2   12.60    2.60
  12  18  -2   11.00    2.90
 -11  18   2    7.40    3.20
  11  18  -2   13.40    3.40
 -11  18   2    6.60    2.40
 -10  18   2   39.90    5.70
  10  18  -2   42.70    5.70
 -10  18   2   35.80    4.80
   9  18  -2   16.20    3.80
   9  18  -2   14.70    3.90
  -9  18   2    9.70    2.80
  -9  18   2   10.00    3.40
  -8  18   2   17.20    3.90
   8  18  -2   32.50    5.30
  -8  18   2   25.60    3.90
   8  18  -2   20.40    4.30
  -7 -18   2  152.18   19.60
   7  18  -2  116.49    9.50
   7  18  -2  128.49    9.30
  -7  18   2  126.39    8.30
  -7  18   2  113.29    9.00
  -6 -18   2   14.30   10.00
   6  18  -2   29.90    5.10
   6  18  -2   20.70    4.00
  -6  18   2   20.30    4.20
  -6  18   2   28.10    4.50
  -5 -18   2   93.09   16.10
  -5  18   2  100.39    8.10
   5  18  -2   92.49    8.10
  -5  18   2   99.59    7.20
  -5  18   2   98.89    7.70
   5  18  -2  102.09    8.90
  -4 -18   2   12.30    9.10
   4  18  -2   10.20    3.60
  -4  18   2    8.00    2.70
   4  18  -2    6.00    3.60
  -4  18   2   12.20    3.20
  -3 -18   2  204.88   16.90
   3 -18  -2  208.78   15.50
   3  18  -2  190.58   11.90
   3  18  -2  191.18   11.60
  -3  18   2  185.08   11.10
  -3  18   2  168.98   10.30
  -3  18   2  192.98   11.90
   2 -18  -2   60.49   10.40
  -2 -18   2   62.49   10.10
   2  18  -2   43.50    6.40
  -2  18   2   59.79    6.20
  -2  18   2   64.19    8.40
  -2  18   2   48.50    6.10
   2  18  -2   41.30    6.10
  -2  18   2   56.49    8.40
  -1 -18   2  250.07   18.00
   1 -18  -2  279.27   17.90
  -1  18   2  275.57   14.20
   1  18  -2  252.37   13.80
   1  18  -2  246.88   13.30
   1  18  -2  263.17   15.00
  -1  18   2  238.38   14.70
   0 -18  -2  136.69   13.80
   0 -18   2  118.49   12.60
   0  18   2  124.59    9.50
   0  18  -2  119.59    9.80
   0  18  -2  140.59   11.20
   0  18   2  133.29    8.70
   1 -18   2  271.47   18.40
  -1 -18  -2  257.87   18.60
   1  18   2  252.37   14.80
  -1  18  -2  245.58   14.80
  -1  18  -2  256.47   14.30
  -1  18  -2  269.87   17.40
  -2 -18  -2   49.99    9.70
   2 -18   2   68.39   11.00
  -2  18  -2   77.79   11.70
  -2  18  -2   42.40    6.50
  -2  18  -2   49.30    5.80
  -2  18  -2   52.49    6.00
   2  18   2   48.70    6.30
   2  18   2   44.90    6.80
  -3 -18  -2  186.38   16.40
   3 -18   2  174.48   16.50
  -3  18  -2  183.98   12.20
   3  18   2  191.08   11.80
  -3  18  -2  199.68   17.40
   3  18   2  191.28   12.00
  -3  18  -2  187.78   10.90
  -3  18  -2  184.48   11.30
  -4 -18  -2   13.10    9.40
   4 -18   2    2.90    7.30
  -4  18  -2   11.80    3.10
   4  18   2    8.90    3.60
   4  18   2    5.50    3.40
  -4  18  -2   11.30    3.90
  -5 -18  -2   89.79   13.40
   5 -18   2  102.79   14.80
  -5 -18  -2  133.79   19.10
  -5  18  -2   96.29    8.70
   5  18   2  105.89    8.80
  -5  18  -2   87.19    7.30
   5  18   2   99.89    8.30
   6 -18   2   12.90   10.10
  -6 -18  -2   38.90   11.20
   6  18   2   14.30    4.20
   6  18   2   22.10    4.50
  -6  18  -2   11.10    4.10
  -6  18  -2   19.70    3.60
   7 -18   2  109.69   18.20
  -7 -18  -2  114.99   19.00
  -7  18  -2  126.59    9.70
   7  18   2  130.59   10.00
  -7  18  -2  128.39    8.80
   7  18   2  133.19    9.70
  -8  18  -2   16.70    4.30
   8  18   2   17.60    4.40
  -8  18  -2   15.00    3.40
   8  18   2   15.20    3.70
  -9  18  -2    8.00    2.80
   9  18   2    9.30    3.30
   9  18   2    7.90    3.40
  10  18   2   36.00    5.80
  10  18   2   37.40    5.70
 -10  18  -2   38.50    4.90
 -11  18  -2   10.50    2.70
  11  18   2    8.00    3.10
 -12  18  -2    6.30    2.30
  12  18   2    8.40    2.70
 -13  18  -2    7.70    2.20
  13  18   2    5.50    2.40
  14  18   2    0.50    1.60
 -14  18  -2    3.20    1.50
  13  19  -2   13.80    2.70
 -13  19   2   10.00    2.10
  12  19  -2    4.60    2.20
 -12  19   2    3.00    1.80
  11  19  -2   40.10    5.20
 -11  19   2   39.70    4.40
 -11  19   2   27.00    4.00
  10  19  -2   40.80    5.30
 -10  19   2   34.50    4.30
 -10  19   2   24.00    3.90
  -9  19   2   62.29    6.50
  -9  19   2   73.29    6.20
   9  19  -2   72.29    7.00
   9  19  -2   83.09    7.20
  -8  19   2   12.70    3.50
  -8  19   2   12.30    2.90
   8  19  -2    8.90    3.40
   8  19  -2   16.00    3.80
   7  19  -2    3.10    3.60
  -7  19   2    1.20    3.10
  -7  19   2    4.90    2.40
   7  19  -2    4.50    2.90
  -6 -19   2   -4.70   10.70
   6 -19  -2    6.90   10.90
   6  19  -2   -1.60    2.60
  -6  19   2    0.40    3.00
  -6  19   2    1.00    2.20
   6  19  -2    6.10    3.30
  -5 -19   2   28.60   13.10
   5 -19  -2   21.70   10.00
  -5 -19   2   20.60   10.10
   5  19  -2   16.40    3.80
  -5  19   2   30.20    4.50
   5  19  -2   18.60    4.50
  -5  19   2   18.80    4.00
  -5  19   2   22.80    3.90
  -4 -19   2   63.99   12.30
   4 -19  -2   79.79   12.70
   4  19  -2   53.39    7.00
  -4  19   2   64.09    5.90
  -4  19   2   72.59    7.00
  -4  19   2   71.29    5.80
   4  19  -2   64.49    6.90
  -3 -19   2   90.29   15.80
   3 -19  -2  104.49   13.40
  -3  19   2  121.89    9.20
   3  19  -2  101.99    8.50
  -3  19   2  109.09    7.60
  -3  19   2  127.69    8.50
  -3  19   2  111.69   12.20
   3  19  -2  116.89    9.30
  -2 -19   2   60.49   11.00
   2 -19  -2   39.60    8.80
   2  19  -2   53.89    6.50
   2  19  -2   48.20    5.90
  -2  19   2   52.69    5.50
   2  19  -2   48.90    6.10
  -2  19   2   45.80    6.50
  -1 -19   2  132.69   14.10
   1 -19  -2  135.89   15.10
   1  19  -2  151.28   10.00
   1  19  -2  154.08   10.00
   1  19  -2  154.68   10.70
  -1  19   2  147.99   10.20
  -1  19   2  156.18    9.60
   0 -19   2   73.39   11.50
   0 -19  -2   65.39   11.20
   0  19   2   68.89    7.30
   0  19  -2   70.79    7.40
   0  19   2   56.29    6.20
   0  19  -2   51.79    7.50
   0  19   2   64.79    7.80
   0  19  -2   52.29    6.40
   0  19  -2   58.19    6.00
   0  19  -2   42.90    6.90
   0  19  -2   50.09    6.90
  -1 -19  -2  149.39   13.90
   1 -19   2  160.18   15.60
   1  19   2  140.99   10.10
   1  19   2  126.19    9.70
   1  19   2  132.99    9.00
  -1  19  -2  135.49   10.10
  -1  19  -2  127.19    8.40
  -1  19  -2  135.19    9.40
  -1  19  -2  112.89    9.20
  -1  19  -2  138.09   12.70
  -2 -19  -2   61.99   10.70
   2 -19   2   41.70    9.40
   2  19   2   51.59    6.70
  -2  19  -2   76.29   12.50
  -2  19  -2   55.59    6.90
   2  19   2   54.79    6.00
   2  19   2   57.59    6.60
  -2  19  -2   45.50    7.70
  -2  19  -2   50.69    5.70
  -2  19  -2   58.69    6.20
   3 -19   2  126.09   14.00
  -3 -19  -2  114.79   15.90
  -3  19  -2  132.19   15.00
  -3  19  -2   91.49    8.50
   3  19   2  116.29    9.10
  -3  19  -2  103.89    7.60
   3  19   2  107.59    8.70
   3  19   2   98.39    8.10
  -4 -19  -2   65.99   13.80
   4 -19   2   70.59   12.50
  -4  19  -2   67.39    6.10
   4  19   2   69.59    7.20
  -4  19  -2   50.29    7.20
   4  19   2   67.39    7.60
  -4  19  -2   70.39   12.10
  -5 -19  -2   12.70   10.50
   5 -19   2   22.40    9.40
   5  19   2   25.30    4.50
  -5  19  -2   20.90    3.50
   5  19   2   31.10    5.10
  -5  19  -2   24.70    4.70
  -6 -19  -2   -1.50   12.10
   6 -19   2  -23.30   10.10
  -6  19  -2    2.20    2.50
   6  19   2    2.70    3.00
   6  19   2    3.80    3.10
  -6  19  -2   -1.80    3.50
   7  19   2   -3.80    3.10
   7  19   2    1.50    3.00
  -7  19  -2   -0.10    2.50
  -7  19  -2    1.00    3.80
   8  19   2   15.80    4.00
  -8  19  -2   16.30    3.30
   8  19   2   16.90    3.90
  -8  19  -2    9.30    4.10
   9  19   2   82.69    7.50
  -9  19  -2   79.49    6.80
   9  19   2   85.09    7.70
 -10  19  -2   29.10    4.60
  10  19   2   22.00    3.90
  10  19   2   32.50    5.40
 -11  19  -2   32.70    4.40
  11  19   2   38.20    5.10
  12  19   2   -0.70    2.00
 -12  19  -2    1.70    1.80
 -13  19  -2   11.30    2.30
  13  19   2   11.60    2.50
  13  20  -2   10.60    2.20
 -13  20   2   12.30    1.90
 -12  20   2   50.39    4.10
  12  20  -2   51.19    4.90
  11  20  -2    4.60    2.40
 -11  20   2    2.60    1.80
 -10  20   2   48.90    5.70
  10  20  -2   50.49    5.60
 -10  20   2   46.60    4.70
   9  20  -2   20.50    3.90
  -9  20   2   19.70    3.10
   9  20  -2   14.90    3.50
  -9  20   2   22.60    3.90
   8  20  -2   68.39    6.70
  -8  20   2   54.79    6.20
  -8  20   2   69.79    5.60
   8  20  -2   59.59    6.60
  -7  20   2   37.10    4.60
  -7  20   2   30.80    4.60
   7  20  -2   31.50    4.90
   7  20  -2   41.30    6.20
   6  20  -2   99.69    8.40
  -6  20   2   91.29    8.00
   6  20  -2   93.79    8.50
  -6  20   2  104.19    7.00
   5 -20  -2   71.49   18.20
  -5 -20   2   14.50   15.70
  -5 -20   2   37.50   18.20
   5  20  -2   41.80    5.60
   5  20  -2   33.50    5.90
  -5  20   2   35.80    4.50
  -5  20   2   30.70    4.90
   4 -20  -2   13.00   10.40
  -4 -20   2    2.90   12.00
   4  20  -2    0.00    2.60
   4  20  -2    4.60    3.30
  -4  20   2    6.90    2.50
  -4  20   2    7.20    7.60
  -4  20   2    6.30    3.30
  -4  20   2    0.60    2.60
   3 -20  -2   26.70    9.70
  -3 -20   2   23.80   11.70
  -3  20   2   27.30    6.80
  -3  20   2   25.20    5.30
  -3  20   2   30.10    4.30
  -3  20   2   24.10    4.50
  -3  20   2   27.70    3.60
   3  20  -2   20.00    3.90
  -2 -20   2  123.39   17.00
   2 -20  -2  104.79   15.50
  -2  20   2   96.29    8.40
   2  20  -2   90.29    7.90
  -2  20   2  109.69    7.90
   2  20  -2  102.09    8.40
   1 -20  -2  106.59   15.40
  -1 -20   2   90.49   15.60
   1  20  -2   94.49    8.30
  -1  20   2  101.99    7.80
   1  20  -2   97.29    8.10
  -1  20   2   92.39    8.30
   0 -20   2  258.47   21.00
   0 -20  -2  235.58   20.20
   0  20   2  230.28   13.70
   0  20  -2  223.58   13.20
   0  20  -2  225.88   13.80
   0  20   2  229.38   13.10
   0  20   2  221.98   13.80
  -1 -20  -2  121.39   16.30
   1 -20   2  108.49   14.90
   1  20   2  117.19    8.00
  -1  20  -2  102.29   10.40
  -1  20  -2  104.39    8.90
  -1  20  -2  108.79   12.70
  -1  20  -2  101.09    7.20
  -1  20  -2   96.49    8.50
   1  20   2  105.99    8.70
   1  20   2  100.69    8.70
   2 -20   2   85.89   14.40
  -2 -20  -2   84.19   13.60
  -2  20  -2  110.59    7.30
   2  20   2  108.99    8.10
   2  20   2  113.49    8.60
  -2  20  -2  122.79   13.20
  -2  20  -2   93.29    8.90
   2  20   2  106.89    8.60
  -2  20  -2  101.19    9.00
  -3 -20  -2    3.70   11.20
   3 -20   2   36.50   11.20
   3  20   2   25.80    4.90
   3  20   2   37.80    5.60
  -3  20  -2   30.40    9.50
   3  20   2   26.00    4.40
  -3  20  -2   19.40    4.50
  -3  20  -2   35.30    4.70
  -4 -20  -2   -6.20   11.00
   4 -20   2   15.90    9.70
  -4 -20  -2    7.30   14.70
   4  20   2    4.30    3.20
   4  20   2    6.50    3.20
  -4  20  -2    4.60    2.60
  -4  20  -2    4.40    3.50
  -4  20  -2   12.20    9.70
  -5 -20  -2   18.50   14.50
   5 -20   2   20.60   16.90
  -5  20  -2   35.20    5.00
  -5  20  -2   56.09   13.00
  -5  20  -2   36.60    4.90
   5  20   2   44.00    5.90
   5  20   2   39.90    6.60
  -6  20  -2   86.99    8.30
  -6  20  -2   93.69    7.20
   6  20   2  108.29    8.50
   6  20   2  104.09    8.60
   7  20   2   26.70    4.50
  -7  20  -2   33.10    4.70
   7  20   2   25.60    4.90
  -7  20  -2   31.90    4.70
   8  20   2   63.49    6.70
  -8  20  -2   60.09    5.80
  -8  20  -2   55.69    6.80
   8  20   2   62.79    6.80
   9  20   2   14.90    3.60
  -9  20  -2   20.00    3.20
   9  20   2   15.60    3.70
  10  20   2   44.70    5.70
 -10  20  -2   47.20    5.00
  11  20   2    4.70    2.40
 -11  20  -2    3.10    2.10
 -12  20  -2   50.29    4.40
  12  20   2   47.00    4.80
  13  20   2   12.50    2.20
 -13  20  -2   10.30    2.00
  12  21  -2    6.20    2.10
  11  21  -2   28.50    4.10
 -11  21   2   29.30    3.30
 -10  21   2   -1.90    2.70
 -10  21   2    0.50    1.60
  10  21  -2    2.30    2.30
   9  21  -2   10.10    2.90
   9  21  -2   13.00    3.30
  -9  21   2   16.80    3.20
  -9  21   2   12.90    2.30
  -8  21   2   58.29    4.90
  -8  21   2   47.40    5.90
   8  21  -2   45.30    6.00
   8  21  -2   49.50    5.90
  -7  21   2   20.60    3.90
  -7  21   2   21.80    3.80
   7  21  -2   19.80    4.10
   7  21  -2   12.60    3.60
   6  21  -2   43.70    5.80
  -6  21   2   31.50   12.00
  -6  21   2   44.00    5.70
  -6  21   2   42.50    4.60
  -5  21   2    1.30    3.00
   5  21  -2    6.90    3.20
  -5  21   2    1.30    9.00
   5  21  -2    5.00    3.40
  -5  21   2    3.10    2.30
   4  21  -2    5.90    3.10
   4  21  -2    6.80    3.40
  -4  21   2   11.10    3.30
  -4  21   2    8.30    3.30
  -4  21   2    4.20    2.50
  -3 -21   2   40.40   15.30
   3 -21  -2   39.90   21.90
  -3  21   2   34.80    5.20
   3  21  -2   28.70    4.90
   3  21  -2   30.70    5.40
  -3  21   2   38.90    4.70
   2 -21  -2   -6.50   10.60
  -2 -21   2    4.30   12.10
  -2  21   2    7.90    2.80
   2  21  -2    6.70    3.40
   2  21  -2   11.90    3.50
  -2  21   2    9.50    3.50
  -1 -21   2  155.58   19.80
   1 -21  -2  131.39   18.70
   1  21  -2  139.29    9.80
   1  21  -2  144.39   10.60
  -1  21   2  154.68    9.60
  -1  21   2  137.49   10.30
   0 -21   2   -1.40   10.40
   0 -21  -2   -9.80   10.40
   0  21  -2    5.50    3.20
   0  21   2   -1.50    2.70
   0  21   2    0.40    3.10
   0  21   2    6.00    4.00
   0  21  -2   -0.60    3.00
  -1 -21  -2  144.89   19.20
   1 -21   2  174.38   17.80
   1  21   2  143.39   10.30
   1  21   2  143.69   10.10
  -1  21  -2  130.79    9.80
  -1  21  -2  145.29   10.20
   1  21   2  149.09    9.50
   2 -21   2    9.70   11.30
  -2 -21  -2   12.50   12.40
   2  21   2    2.60    3.00
   2  21   2    5.60    3.40
  -2  21  -2    2.40    2.40
   2  21   2   -2.00    2.90
  -2  21  -2    2.80    3.10
  -2  21  -2    2.70    6.20
  -2  21  -2   -2.30    4.00
  -2  21  -2    4.90    8.90
  -3 -21  -2    1.70   14.10
   3 -21   2   28.10   19.80
   3  21   2   42.50    5.70
  -3  21  -2   32.50    4.60
   3  21   2   41.70    6.00
  -3  21  -2   31.40    5.20
  -3  21  -2   30.40    9.30
   3  21   2   40.50    5.80
  -4  21  -2    3.00    9.90
  -4  21  -2    8.90    2.70
   4  21   2    7.90    3.60
  -4  21  -2    7.20    3.50
  -5  21  -2    3.30    2.20
  -5  21  -2    1.10   11.60
  -5  21  -2    4.50    3.30
   5  21   2    4.80    3.00
   5  21   2    1.40    3.20
   6  21   2   45.80    6.50
  -6  21  -2   48.40   14.50
  -6  21  -2   43.90    5.10
   6  21   2   50.09    6.00
  -6  21  -2   31.90    4.80
   7  21   2   18.30    4.00
   7  21   2   15.10    3.50
  -7  21  -2   19.00    4.10
  -7  21  -2   21.30    3.30
   8  21   2   68.89    6.60
  -8  21  -2   62.69    5.60
   8  21   2   58.79    6.60
  -8  21  -2   52.69    6.70
  -9  21  -2   12.30    2.70
   9  21   2   10.00    2.90
   9  21   2   13.60    3.40
 -10  21  -2    2.80    1.90
  10  21   2   -0.70    2.20
 -11  21  -2   29.00    3.50
  11  21   2   26.60    4.10
 -12  21  -2    3.10    1.60
  12  21   2    2.80    1.90
 -11  22   2    5.40    1.60
  11  22  -2    7.80    2.40
  10  22  -2    9.30    2.70
 -10  22   2    9.60    2.00
 -10  22   2   10.00    3.10
   9  22  -2    6.20    2.70
   9  22  -2    1.40    2.40
  -9  22   2    8.40    2.90
  -9  22   2    6.40    2.00
   8  22  -2   20.00    3.70
  -8  22   2   22.10    3.70
  -8  22   2   20.40    3.50
   8  22  -2   24.20    4.10
  -7  22   2   31.40    5.10
   7  22  -2   31.70    5.30
  -7  22   2   29.30    4.00
   7  22  -2   33.00    5.20
  -6  22   2    4.30    2.80
   6  22  -2    5.40    2.90
   6  22  -2    7.60    3.30
  -6  22   2    4.60    2.10
  -5  22   2    3.90    2.70
   5  22  -2    3.70    3.10
  -5  22   2   -0.50    2.10
   5  22  -2   -0.70    2.70
   4  22  -2   15.50    3.90
  -4  22   2   15.20    3.60
   4  22  -2   14.60    3.70
   3  22  -2   78.89    7.30
   3  22  -2   72.09    7.50
  -3  22   2   68.49    7.30
  -3  22   2   79.39    6.60
  -2  22   2   19.50    4.20
  -2  22   2   18.20    3.90
   2  22  -2   31.40    5.40
   2  22  -2   24.60    4.40
   1  22  -2  150.68   10.10
   1  22  -2  153.78   11.00
  -1  22   2  158.08    9.90
  -1  22   2  163.28   11.00
   0  22   2    0.80    2.50
   0  22   2   -0.50    2.60
   0  22   2    4.60    3.70
   0  22  -2    1.40    3.10
   0  22  -2    4.30    3.10
  -1  22  -2  136.89    9.90
   1  22   2  150.18   10.20
   1  22   2  133.79    8.90
   1  22   2  127.19    9.40
  -1  22  -2  130.59    9.50
   2  22   2   34.80    5.80
   2  22   2   21.30    4.10
  -2  22  -2   25.60    4.60
   2  22   2   24.80    3.90
  -3  22  -2   67.09    7.30
   3  22   2   86.59    7.90
   3  22   2   65.89    6.50
   3  22   2   78.09    7.20
  -3  22  -2   75.99    5.80
  -4  22  -2   20.40    4.40
  -4  22  -2   23.10    4.00
   4  22   2   21.20    4.10
  -4  22  -2   11.50    9.80
   4  22   2   24.80    4.20
  -5  22  -2    1.80    2.10
  -5  22  -2   -1.60    3.10
   5  22   2   -2.70    2.90
  -5  22  -2   -9.40   14.00
  -6  22  -2    3.30    2.10
  -6  22  -2    1.20    3.40
   6  22   2    6.60    3.20
   6  22   2    3.90    2.80
  -7  22  -2   34.50    4.20
  -7  22  -2   32.70    4.60
   7  22   2   28.20    4.50
   7  22   2   36.20    5.30
  -8  22  -2   31.30    3.90
   8  22   2   23.60    4.10
  -8  22  -2   22.50    5.40
   8  22   2   25.70    4.20
   9  22   2   10.20    2.70
   9  22   2    5.00    2.60
  -9  22  -2    9.60    2.30
  10  22   2   10.70    2.70
 -10  22  -2    9.50    2.10
 -11  22  -2    3.10    1.60
  11  22   2    1.30    1.90
  11  23  -2    4.10    1.80
 -10  23   2   23.60    2.70
  10  23  -2   24.30    3.80
  -9  23   2   -0.40    1.50
  -9  23   2    1.00    2.80
   9  23  -2   -1.10    1.90
  -8  23   2    0.20    2.40
  -8  23   2    3.40    1.70
   8  23  -2    2.00    2.40
   8  23  -2    2.80    2.30
   7  23  -2   33.50    5.10
  -7  23   2   35.60    3.70
   7  23  -2   28.50    5.00
  -7  23   2   37.80    5.00
   6  23  -2   17.10    3.90
  -6  23   2    8.30    3.10
   6  23  -2   18.10    3.60
  -5  23   2   14.70    3.40
   5  23  -2    8.20    3.20
   5  23  -2   15.00    3.40
  -4  23   2   62.39    6.50
   4  23  -2   65.09    6.50
   4  23  -2   65.59    7.10
   3  23  -2    4.10    3.00
   3  23  -2    4.20    3.10
  -3  23   2    4.80    3.00
   2  23  -2   28.70    5.00
   2  23  -2   24.50    4.10
  -2  23   2   24.20    4.30
  -1  23   2    3.20    2.60
   1  23  -2    1.50    2.90
   1  23  -2   -1.80    2.80
  -1  23   2    0.00    2.60
   0  23  -2  174.78   11.90
   0  23  -2  181.98   11.30
   0  23   2  188.18   10.90
   0  23   2  194.08   12.10
   1  23   2    1.00    2.50
  -1  23  -2    0.80    3.00
   1  23   2    3.80    3.30
  -1  23  -2   -7.40    3.00
   1  23   2   -1.20    3.00
  -2  23  -2   20.80    4.20
   2  23   2   21.10    4.10
   3  23   2    1.50    2.90
  -3  23  -2   -5.50    2.60
   3  23   2   -0.60    2.70
  -3  23  -2    2.20    2.90
   4  23   2   56.79    6.40
  -4  23  -2   56.49    4.90
   4  23   2   67.29    7.00
  -4  23  -2   62.09    6.60
  -5  23  -2   16.90    2.70
   5  23   2   16.70    3.70
  -5  23  -2   18.50    3.70
   5  23   2   15.80    3.90
   6  23   2   16.40    3.80
  -6  23  -2    9.50    3.50
   6  23   2   18.90    3.60
  -6  23  -2   18.10    2.60
   7  23   2   29.20    5.10
  -7  23  -2   34.20    3.90
  -7  23  -2   28.80    4.10
   7  23   2   34.00    5.10
   8  23   2   -0.20    2.30
  -8  23  -2   -1.10    1.70
   8  23   2    3.50    2.40
   9  23   2    1.60    2.00
  -9  23  -2    0.40    1.50
   9  23   2   -0.60    2.00
  10  23   2   30.10    3.80
 -10  23  -2   28.80    3.00
 -11  23  -2    3.70    1.30
  11  23   2    5.30    2.10
  10  24  -2    1.60    1.80
   9  24  -2    1.00    1.90
  -9  24   2    1.40    2.60
   8  24  -2   28.80    4.30
   8  24  -2   26.40    4.20
  -8  24   2   25.90    3.50
  -7  24   2    6.10    2.70
   7  24  -2    9.40    2.70
   7  24  -2    6.20    2.50
  -6  24   2    7.50    3.00
   6  24  -2   13.60    3.40
   6  24  -2   12.70    3.10
  -5  24   2    8.50    3.10
   5  24  -2    8.10    2.90
   5  24  -2    7.10    3.00
   4  24  -2    8.70    3.30
  -4  24   2    8.80    3.10
   4  24  -2   13.90    3.20
   3  24  -2   32.40    5.50
   3  24  -2   31.80    5.00
  -3  24   2   38.90    5.50
  -2  24   2   79.29    7.00
   2  24  -2   63.69    6.30
   2  24  -2   63.59    7.00
   1  24  -2   53.89    6.30
   1  24  -2   48.90    6.00
  -1  24   2   45.50    5.90
   0  24  -2  135.39    9.80
   0  24  -2  136.49    9.20
   2  24   2   75.19    7.10
  -2  24  -2   62.09    6.80
   2  24   2   71.09    6.80
   3  24   2   29.50    4.30
   3  24   2   25.30    4.20
  -3  24  -2   23.80    4.00
   4  24   2   11.40    3.30
   4  24   2   10.00    3.40
  -4  24  -2    9.70    3.10
   5  24   2   12.90    3.30
  -5  24  -2   18.90    3.40
   5  24   2   15.50    3.60
   6  24   2   15.40    3.40
  -6  24  -2    7.60    2.90
  -6  24  -2    9.00    2.00
   6  24   2    4.50    2.70
  -7  24  -2    8.40    1.80
  -7  24  -2    7.80    3.20
   7  24   2   10.20    2.90
   7  24   2    9.20    2.80
   8  24   2   36.30    4.50
  -8  24  -2   29.00    3.00
   8  24   2   33.70    4.40
  -9  24  -2    1.40    1.30
   9  24   2    4.30    2.10
  10  24   2    0.80    1.70
   9  25  -2   10.90    2.30
  -8  25   2    7.90    2.50
   8  25  -2    5.90    2.40
   7  25  -2   23.60    3.80
  -7  25   2   23.60    3.90
   7  25  -2   17.40    3.00
   6  25  -2   19.00    3.30
  -6  25   2   13.20    2.90
  -5  25   2   33.60    4.80
   5  25  -2   41.50    4.80
   5  25  -2   46.90    5.30
   4  25  -2   11.00    2.90
   4  25  -2   10.00    3.10
   3  25  -2   25.50    4.10
  -3  25   2   33.10    4.90
   3  25  -2   34.90    5.00
  -2  25   2   36.10    5.20
   2  25  -2   40.20    5.20
   2  25  -2   40.90    5.50
   1  25  -2    7.10    3.20
  -1  25   2    9.50    3.10
   1  25  -2    7.40    2.90
   0  25  -2    9.10    2.90
   0  25   2    8.30    2.90
  -1  25  -2    5.80    2.90
   1  25   2    4.10    2.80
   1  25   2    2.60    3.40
   2  25   2   38.70    5.40
   2  25   2   31.30    4.20
  -2  25  -2   19.70    3.90
   3  25   2   38.60    5.60
  -3  25  -2   34.20    5.10
   3  25   2   30.60    5.10
  -4  25  -2    6.40    2.90
   4  25   2    8.90    2.80
   4  25   2    6.10    2.80
   5  25   2   44.80    5.30
  -5  25  -2   41.20    5.30
   5  25   2   45.00    5.20
  -6  25  -2    9.00    3.10
   6  25   2   12.80    3.10
   6  25   2    9.40    2.60
   7  25   2   25.80    3.90
   7  25   2   26.40    4.00
   8  25   2    5.60    2.30
   8  25   2    8.20    2.30
   9  25   2    4.40    1.90
   8  26  -2    7.80    2.20
   7  26  -2   40.00    4.20
  -7  26   2   30.30    3.90
   7  26  -2   36.20    4.10
  -6  26   2    8.20    2.40
   6  26  -2    9.40    2.50
   6  26  -2   10.60    2.60
   5  26  -2   23.20    4.00
  -5  26   2   30.90    4.20
   5  26  -2   23.10    4.10
   4  26  -2    5.20    2.50
   4  26  -2   10.30    2.70
  -4  26   2    8.40    2.50
   3  26  -2   11.20    2.90
   3  26  -2   16.70    3.30
  -3  26   2   18.90    3.30
   2  26  -2   32.20    4.40
  -2  26   2   18.40    3.40
   2  26  -2   27.60    4.10
  -1  26   2    1.30    2.40
   1  26  -2    5.30    2.70
   1  26  -2    7.00    2.70
   0  26   2    7.00    2.70
   0  26  -2   -0.50    2.80
   0  26  -2    4.20    2.70
   1  26   2    8.20    2.80
  -1  26  -2    9.10    2.80
   2  26   2   32.80    4.90
  -2  26  -2   27.60    4.50
   3  26   2   14.30    3.10
   3  26   2   14.70    3.30
  -3  26  -2   14.80    3.10
   4  26   2    5.40    2.60
   4  26   2   12.90    3.00
  -4  26  -2   11.60    2.90
   5  26   2   24.80    4.10
  -5  26  -2   25.70    4.40
   5  26   2   36.80    4.60
   6  26   2    6.80    2.60
  -6  26  -2    9.40    3.00
   6  26   2    7.30    2.30
   7  26   2   38.00    4.00
   7  26   2   37.80    4.40
   8  26   2    7.10    2.10
  -6  27   2   30.20    3.50
   6  27  -2   35.90    3.80
   6  27  -2   37.60    4.00
   5  27  -2    6.60    2.20
  -5  27   2    4.70    2.10
   5  27  -2    8.20    2.50
   4  27  -2   15.10    2.80
  -4  27   2   19.10    3.20
   4  27  -2   18.20    2.90
  -3  27   2   -1.00    1.90
   3  27  -2   -3.00    2.00
   3  27  -2    1.20    2.00
  -2  27   2   -0.40    2.00
   2  27  -2    3.10    2.10
   2  27  -2    1.20    2.30
  -1  27   2   51.39    5.10
   1  27  -2   50.19    5.20
   0  27   2   25.20    4.20
   0  27  -2   19.50    3.30
   1  27   2   66.39    5.70
  -1  27  -2   54.79    5.50
   2  27   2   -1.00    1.90
  -2  27  -2    2.00    2.20
  -3  27  -2    1.90    2.20
   3  27   2   -1.60    1.90
   3  27   2    2.20    2.90
   4  27   2   12.50    2.80
   4  27   2    8.20    2.40
  -4  27  -2   12.10    2.60
  -5  27  -2    2.10    2.50
   5  27   2    5.10    2.20
   5  27   2    2.90    2.10
   6  27   2   35.50    3.90
   6  27   2   36.60    4.10
  -5  28   2    7.20    2.00
   5  28  -2    6.20    1.90
   5  28  -2    6.70    2.10
   4  28  -2    1.90    2.10
  -4  28   2    1.40    1.80
   4  28  -2    5.30    1.80
   3  28  -2   10.20    2.30
   3  28  -2    9.60    2.50
  -3  28   2    7.60    2.10
   2  28  -2    6.50    2.80
  -2  28   2   11.70    2.40
   2  28  -2   10.40    2.40
   1  28  -2   25.70    3.90
  -1  28   2   30.80    4.00
   0  28   2    3.40    2.10
   0  28  -2    8.70    2.30
   1  28   2   26.20    3.70
  -1  28  -2   23.80    3.60
  -2  28  -2    7.50    2.30
   2  28   2   10.40    2.50
  -3  28  -2    8.60    2.20
   3  28   2    8.40    2.30
  -4  28  -2    3.50    2.20
   4  28   2    8.00    2.20
   5  28   2    5.00    2.00
   5  28   2    3.70    2.90
  -1  29   2    5.60    1.90
   1  29  -2    7.80    2.00
   0  29  -2    6.70    1.80
   0  29   2    3.10    1.70
   1  29   2    7.80    2.20
  -1  29  -2    7.30    2.00
  16   0  -3    3.60    2.10
  15   0  -3    8.30    2.70
  14   0  -3  121.79    8.60
  13   0  -3   44.10    5.40
  13   0  -3   33.20   10.80
  12   0  -3    6.50    2.90
  12   0  -3    8.60    7.60
  11   0  -3   46.60    8.00
  11   0  -3   37.30    5.50
  10   0  -3    7.10    4.60
   9   0  -3   98.39    8.80
   8   0  -3   71.49    6.50
   8   0  -3   75.99    9.80
  -8   0   3   62.79    6.20
  -7   0   3  186.58   10.50
   7   0  -3  177.08   10.70
   7   0  -3  191.58   13.80
   6   0  -3   63.89    7.90
   6   0  -3   51.09    4.70
  -6   0   3   50.59    4.60
  -5   0   3  114.69    6.60
   5   0  -3  110.99    8.50
   5   0  -3  109.89    6.70
  -5   0   3  105.39    6.90
  -4   0   3 1171.08   49.10
  -4   0   3 1135.99   49.40
   4   0  -3 1057.99   50.39
   4   0  -3 1139.59   49.10
  -3   0   3 1135.79   48.70
   3   0  -3 1179.98   49.90
   3   0  -3 1106.79   48.60
  -3   0   3 1076.79   48.80
   2   0  -3  167.18    8.10
   2   0  -3  173.38    9.20
  -2   0   3  181.88    8.30
  -2   0   3  164.18    8.30
   1   0  -3  219.18   11.10
   1   0  -3  230.88   10.30
  -1   0   3  222.08   10.40
  -1   0   3  240.18   10.20
   0   0   3   -0.30    0.60
   1   0   3  233.38   10.20
   2   0   3  167.38    7.60
   2   0   3  182.18    8.40
   3   0   3 1126.09   48.90
   4   0   3 1145.79   50.09
   5   0   3  114.79    7.10
   6   0   3   47.80    4.90
   7   0   3  177.98   11.10
   8   0   3   62.49    7.10
   9   0   3   93.49    8.60
  10   0   3    1.90    5.00
  11   0   3   37.00    5.00
  11   0   3   45.10    8.30
  12   0   3   12.50    8.50
  13   0   3   45.60    5.30
  13   0   3   28.80   11.00
  14   0   3  119.19    8.20
  16  -1  -3   55.39    5.20
  16   1  -3   57.39    5.10
  15  -1  -3    9.60    2.90
  15   1  -3    4.90    2.40
  14  -1  -3   26.30    4.20
  14   1  -3   17.00    3.40
  13  -1  -3   -3.90   10.10
  13  -1  -3    2.40    2.70
  13   1  -3    0.40    2.40
  13   1  -3   -7.30   10.20
  12  -1  -3  141.19    9.10
  12  -1  -3  130.79   14.50
  12   1  -3  137.39   13.80
  12   1  -3  113.89    8.60
  11  -1  -3    4.90    5.30
  11  -1  -3    0.30    2.70
  11   1  -3    5.70    6.20
  11   1  -3   -0.60    2.70
  10  -1  -3   48.20    8.30
  10   1  -3   66.59    7.80
   9  -1  -3   60.79    6.90
  -9  -1   3   73.69    6.60
   9   1  -3   58.09    7.30
   8  -1  -3  340.57   17.80
  -8  -1   3  325.47   16.80
   8   1  -3  318.67   20.00
   8   1  -3  363.76   17.80
  -8   1   3  321.27   16.90
   7  -1  -3  385.16   19.00
  -7  -1   3  403.86   18.50
   7  -1  -3  359.16   21.40
   7   1  -3  357.06   20.90
  -7   1   3  380.46   18.50
   7   1  -3  372.56   18.80
   6  -1  -3 2529.45  111.59
   6  -1  -3 2613.04  113.79
  -6  -1   3 2486.55  111.09
  -6  -1   3 2524.25  112.09
   6   1  -3 2658.53  113.39
   6   1  -3 2625.64  111.49
  -6   1   3 2671.23  111.29
  -5  -1   3  174.68    9.30
   5  -1  -3  174.68    9.50
  -5  -1   3  174.48    9.80
   5  -1  -3  172.78   11.50
   5   1  -3  177.88   11.20
   5   1  -3  173.18    9.40
  -5   1   3  177.18    9.30
  -4  -1   3   80.29    5.40
  -4  -1   3   74.49    5.10
   4  -1  -3   77.59    6.90
   4  -1  -3   81.39    5.20
   4   1  -3   89.19    6.70
   4   1  -3   93.09    5.20
  -3  -1   3  443.16   19.90
  -3  -1   3  416.16   19.90
   3  -1  -3  434.96   19.80
   3  -1  -3  459.05   21.20
  -3   1   3  462.55   19.90
   3   1  -3  434.76   19.70
   3   1  -3  420.86   20.80
  -2  -1   3  306.67   14.10
  -2  -1   3  286.47   14.00
   2  -1  -3  336.07   15.20
   2  -1  -3  314.37   14.00
  -2   1   3  289.77   14.10
   2   1  -3  313.77   13.90
   2   1  -3  322.17   15.00
   1  -1  -3 1847.82   82.29
  -1  -1   3 1905.81   82.49
   1   1  -3 2034.10   83.19
  -1   1   3 1905.51   82.39
   1   1  -3 1985.40   82.19
   0  -1   3    6.70    1.10
   0   1  -3    4.70    1.80
   0   1   3    5.60    0.90
   1  -1   3 1999.00   85.79
   1  -1   3 2103.69   86.09
   1   1   3 1965.10   85.59
   2  -1   3  309.57   14.30
  -2  -1  -3  308.47   14.20
   2   1   3  329.17   14.50
   3  -1   3  439.26   20.00
   3   1   3  440.96   19.90
   4  -1   3   86.39    5.50
   4   1   3   80.19    5.30
   5  -1   3  174.18    9.80
   5   1   3  184.38    9.80
   6  -1   3 2619.04  111.39
   6   1   3 2530.55  111.29
   7  -1   3  380.06   19.90
   7   1   3  397.26   19.70
   8  -1   3  356.96   19.10
   8   1   3  347.17   18.90
   9  -1   3   54.59    7.30
   9   1   3   77.69    7.70
  10  -1   3   74.39    9.60
  10   1   3   63.19    8.60
  11  -1   3    6.80    6.60
  11   1   3    9.30    6.10
  12  -1   3  129.09    9.10
  12  -1   3  126.29   14.00
  12   1   3  147.99   15.60
  12   1   3  133.49    9.00
  13  -1   3    4.30    2.60
  13  -1   3   26.80   11.10
  13   1   3    0.10    2.50
  13   1   3   -5.80   10.80
  14  -1   3   20.70    3.70
  14   1   3   29.70    4.40
  16  -2  -3    2.00    1.90
  16   2  -3    6.40    2.20
  15  -2  -3    6.80    2.70
  15   2  -3    0.80    1.90
 -15   2   3    1.20    3.70
  14  -2  -3  142.19    9.20
 -14   2   3  124.09   10.10
  14   2  -3  122.99    8.60
  13  -2  -3   77.99    6.90
  13  -2  -3   60.79   11.70
  13   2  -3   67.89   12.80
 -13   2   3   71.09    8.40
  13   2  -3   79.09    6.60
  12  -2  -3   62.09    6.20
  12  -2  -3   74.39   11.10
  12   2  -3   50.49    9.90
 -12   2   3   40.30    6.30
  12   2  -3   60.29    6.10
  11  -2  -3    8.80    3.10
  11  -2  -3    6.50    6.20
  11   2  -3    7.40    2.80
  11   2  -3    0.40    6.40
  10  -2  -3   55.79    7.90
  10   2  -3   61.89    8.70
   9  -2  -3   11.80    4.60
  -9  -2   3    3.00    3.80
   9   2  -3    9.10    3.70
   8  -2  -3  109.29    8.00
  -8  -2   3   99.99    7.20
   8   2  -3   88.89    7.60
   8   2  -3   83.79   10.50
  -7  -2   3 1023.40   45.00
   7  -2  -3 1002.00   44.30
  -7  -2   3  946.21   43.40
   7  -2  -3  939.41   46.80
   7   2  -3  982.90   43.90
   7   2  -3  954.50   46.10
  -7   2   3  969.80   43.60
   6  -2  -3  170.18   12.40
  -6  -2   3  172.38    9.60
   6  -2  -3  174.88   10.20
  -6  -2   3  165.38   10.40
   6   2  -3  171.18    9.80
  -6   2   3  175.08    9.70
   6   2  -3  188.88   12.10
  -5  -2   3  189.08   10.50
  -5  -2   3  182.88    9.90
   5  -2  -3  191.28   10.30
   5  -2  -3  182.48   12.30
  -5   2   3  203.78   10.10
   5   2  -3  195.48   11.80
   5   2  -3  196.98   10.00
   4  -2  -3  278.87   14.30
  -4  -2   3  250.17   12.20
   4  -2  -3  256.87   12.40
  -4  -2   3  252.07   12.60
   4   2  -3  236.98   11.90
  -4   2   3  239.88   12.10
   4   2  -3  236.18   13.30
  -3  -2   3  278.67   12.90
   3  -2  -3  272.37   12.90
   3  -2  -3  282.07   14.30
  -3  -2   3  293.57   13.20
   3   2  -3  258.67   13.70
   3   2  -3  258.57   12.50
  -3   2   3  256.57   12.90
  -2  -2   3  392.36   18.50
   2  -2  -3  455.55   19.60
   2  -2  -3  420.86   18.40
   2   2  -3  397.86   18.00
  -2   2   3  401.06   18.50
   2   2  -3  403.06   19.20
   1  -2  -3   64.59    3.70
  -1  -2   3   66.69    3.80
   1   2  -3   64.39    3.30
   1   2  -3   66.49    4.60
  -1   2   3   66.89    3.70
   0  -2   3 1809.72   77.49
   0   2   3 1792.52   77.39
   0   2   3 1850.91   77.29
   1  -2   3   67.19    3.60
  -1  -2  -3   65.79    3.40
   1  -2   3   66.19    3.60
  -2  -2  -3  397.26   17.60
  -2  -2  -3  395.16   16.80
   2  -2   3  386.96   17.70
   3  -2   3  247.48   12.50
  -3  -2  -3  260.27   12.60
   3   2   3  283.57   12.60
   4  -2   3  232.38   12.00
  -4  -2  -3  242.28   12.20
   4   2   3  251.97   12.00
   5  -2   3  197.58   10.60
   5   2   3  193.48   10.40
   6  -2   3  174.48   10.30
   6   2   3  182.48   10.40
   7  -2   3  958.60   44.30
   7   2   3  979.60   44.10
   8  -2   3  103.59    8.50
   8   2   3  111.69    8.40
   9  -2   3   17.30    5.10
   9   2   3    9.10    4.10
  10  -2   3   60.09    9.20
  10   2   3   63.49    9.30
  11  -2   3   13.90    6.90
  11  -2   3    6.90    2.90
  11   2   3    2.90    6.60
  11   2   3   11.30    3.10
  12  -2   3   69.99    6.40
  12  -2   3   65.29   11.00
  12   2   3   53.09    5.70
  12   2   3   63.69    8.80
  12   2   3   42.70   10.40
  13  -2   3   86.09    6.80
  13  -2   3   57.39   12.70
  13   2   3   77.19    6.60
  14  -2   3  124.69    8.70
  14   2   3  135.59    8.60
 -17   3   3   15.30    5.50
  16  -3  -3   22.70    3.90
 -16   3   3   20.50    4.10
  16   3  -3   20.80    3.50
  15  -3  -3   21.00    3.70
 -15   3   3   21.00    4.40
  15   3  -3   26.40    4.10
  14  -3  -3    8.30    2.80
  14   3  -3   10.00    2.60
 -14   3   3    9.90    4.00
  13  -3  -3  172.08   10.80
  13   3  -3  175.28   10.30
  13   3  -3  155.18   20.30
 -13   3   3  160.78   11.50
  12  -3  -3  152.78   10.10
  12  -3  -3  151.48   15.40
 -12   3   3  140.99   10.80
  12   3  -3  149.19   16.00
  12   3  -3  155.48    9.60
  11  -3  -3  268.57   14.30
  11  -3  -3  245.58   16.80
  11   3  -3  240.48   17.30
  11   3  -3  242.58   13.40
  10  -3  -3  280.47   17.30
  10   3  -3  292.27   17.50
  -9  -3   3   37.60    5.40
   9  -3  -3   43.00    7.00
   9   3  -3   38.80    5.90
   8  -3  -3   62.19    6.50
  -8  -3   3   68.09    7.00
  -8  -3   3   54.29    5.90
   8   3  -3   73.39    6.70
   8   3  -3   55.19    9.10
   7  -3  -3   76.89    6.40
  -7  -3   3   71.29    6.20
  -7  -3   3   74.19    6.70
   7   3  -3   80.79    8.70
   7   3  -3   75.59    6.20
   6  -3  -3  762.92   37.00
  -6  -3   3  724.43   34.40
  -6  -3   3  695.33   33.40
   6  -3  -3  738.23   34.10
   6   3  -3  771.92   33.60
   6   3  -3  767.22   35.50
   5  -3  -3  756.52   33.70
  -5  -3   3  741.13   33.30
   5  -3  -3  745.93   35.80
  -5  -3   3  719.33   33.90
   5   3  -3  741.63   34.70
  -5   3   3  744.33   33.40
   5   3  -3  754.22   33.10
  -4  -3   3    9.10    2.20
   4  -3  -3    7.50    4.50
  -4  -3   3   10.50    2.10
   4  -3  -3    9.40    2.20
  -4   3   3   11.00    2.10
   4   3  -3    8.60    2.80
   4   3  -3   10.20    1.90
   3  -3  -3  342.77   17.30
   3  -3  -3  365.26   18.90
  -3  -3   3  349.57   17.40
  -3   3   3  395.96   17.50
   3   3  -3  409.96   18.50
   3   3  -3  396.96   16.90
   2  -3  -3  737.83   32.80
  -2  -3   3  758.02   33.00
   2  -3  -3  782.82   34.70
   2   3  -3  724.13   33.60
   2   3  -3  757.02   32.30
  -2   3   3  744.83   32.90
  -1  -3   3 4740.53  208.38
   1  -3  -3 4982.20  208.28
   1   3  -3 4850.51  209.08
  -1   3   3 4919.01  208.38
  -1   3   3 5169.78  208.78
   1   3  -3 4835.62  207.68
   0  -3   3   39.50    2.80
   0   3   3   46.50    2.90
   1  -3   3 5118.79  207.78
   1  -3   3 4699.03  207.88
   2  -3   3  720.83   32.50
  -2  -3  -3  767.52   32.50
  -3  -3  -3  389.96   17.40
  -3  -3  -3  390.56   16.20
   3  -3   3  384.76   17.30
   3   3   3  327.47   17.00
  -4  -3  -3    8.90    2.20
  -4  -3  -3   10.00    1.20
   4  -3   3   11.60    2.30
   4   3   3   11.20    2.20
  -5  -3  -3  697.23   32.60
   5  -3   3  686.53   32.50
   5   3   3  764.52   32.50
   6  -3   3  727.93   33.90
  -6  -3  -3  740.33   34.20
   6   3   3  740.63   33.70
   7  -3   3   88.69    7.30
   7   3   3   79.09    6.60
   8  -3   3   69.09    6.90
   8   3   3   64.29    7.00
   9  -3   3   52.29    7.60
   9   3   3   46.30    6.50
  10  -3   3  305.27   18.80
  10   3   3  277.67   17.70
  11  -3   3  297.17   19.00
  11  -3   3  268.47   14.70
  11   3   3  268.57   19.00
  11   3   3  244.18   13.90
  12  -3   3  159.08   10.20
  12  -3   3  133.79   15.60
  12   3   3  156.38   11.60
  12   3   3  147.59   16.80
  12   3   3  161.58    9.70
  13  -3   3  154.68   19.30
  13  -3   3  184.68   10.90
  13   3   3  180.08   10.40
  13   3   3  146.79   11.90
  14  -3   3   17.10    3.20
  14   3   3   13.20    2.80
 -17   4   3   29.40    4.30
  16  -4  -3    4.60    2.20
  16   4  -3    9.90    2.20
 -16   4   3    4.60    3.40
  15  -4  -3   16.90    3.20
 -15   4   3   19.50    3.90
  15   4  -3   14.90    2.70
  14  -4  -3    2.80    2.80
 -14   4   3   -5.50    3.30
  14   4  -3    2.40    2.30
  13  -4  -3   10.00    3.50
  13  -4  -3    8.20   10.50
  13   4  -3   15.60   13.30
 -13   4   3    6.00    3.80
  13   4  -3   11.90    3.00
  12  -4  -3   41.30    6.10
  12  -4  -3   38.60    9.40
  12   4  -3   55.89   11.20
  12   4  -3   47.30    5.40
 -12   4   3   50.59    6.60
  11  -4  -3   38.30    5.80
  11  -4  -3   19.30    6.50
  11   4  -3   25.40    8.00
  11   4  -3   30.50    4.60
  10  -4  -3   48.20    7.80
  10   4  -3   41.80    7.10
   9  -4  -3   60.29    7.20
  -9  -4   3   46.00    6.90
   9   4  -3   57.29    8.80
   9   4  -3   50.99    7.20
   8  -4  -3   45.80    5.80
  -8  -4   3   40.40    5.80
  -8  -4   3   45.90    6.70
   8   4  -3   58.99    6.30
   8   4  -3   59.09    8.90
  -7  -4   3   65.19    5.80
  -7  -4   3   77.39    6.80
   7  -4  -3   80.09    6.40
   7   4  -3   70.49    8.20
   7   4  -3   55.49    5.60
  -6  -4   3   46.40    4.70
   6  -4  -3   48.40    4.80
  -6  -4   3   45.90    5.00
   5  -4  -3  428.36   22.80
  -5  -4   3  418.06   19.80
   5  -4  -3  429.16   20.10
  -5  -4   3  407.36   20.40
   5   4  -3  424.36   21.10
   5   4  -3  412.16   19.40
   4  -4  -3  463.95   21.30
   4  -4  -3  443.26   23.60
  -4  -4   3  453.25   21.60
  -4  -4   3  461.15   21.20
   4   4  -3  436.66   22.00
   4   4  -3  475.55   20.60
   3  -4  -3   16.00    4.40
  -3  -4   3   16.10    2.70
   3  -4  -3   18.20    2.60
   3   4  -3   18.30    2.00
   3   4  -3   17.10    3.20
  -2  -4   3  422.26   19.80
   2  -4  -3  400.96   19.50
   2   4  -3  457.95   18.80
   2   4  -3  452.35   20.60
  -1  -4   3  559.14   23.30
   1  -4  -3  522.05   22.90
   1   4  -3  509.35   23.90
  -1   4   3  494.15   23.40
   1   4  -3  509.95   22.10
   0  -4   3  650.43   29.20
   0  -4  -3  673.03   29.00
   0   4   3  670.63   28.80
   1  -4   3  501.65   23.00
   1  -4   3  535.55   22.70
   2  -4   3  446.96   20.00
   3  -4   3   20.70    2.60
  -3  -4  -3   16.10    2.50
  -3  -4  -3   15.60    1.80
   4  -4   3  451.45   21.30
  -4  -4  -3  441.06   20.00
  -4  -4  -3  478.55   21.50
   4   4   3  464.35   21.20
   5  -4   3  387.56   18.40
  -5  -4  -3  396.56   18.60
  -5  -4  -3  352.76   16.50
   6  -4   3   67.19    5.60
  -6  -4  -3   67.69    6.10
   6   4   3   54.69    5.40
   7  -4   3   57.89    6.10
   7   4   3   77.79    6.20
   8  -4   3   55.09    6.30
   8   4   3   37.60    6.10
   9  -4   3   51.59    7.60
   9   4   3   45.50    7.00
  10  -4   3   65.89    9.20
  10   4   3   46.70    7.80
  11  -4   3   25.70    4.20
  11  -4   3   28.20    7.70
  11   4   3   30.60    8.40
  11   4   3   29.30    4.00
  12  -4   3   44.40    9.50
  12  -4   3   52.99    6.00
 -12   4  -3   43.20    6.40
  12   4   3   46.40    7.60
  12   4   3   41.40    5.10
  13  -4   3   24.00   11.10
  13  -4   3   12.00    3.30
  13   4   3   10.60    4.20
 -13   4  -3   18.70    5.20
  13   4   3   12.20    2.80
  14   4   3   -3.70    3.90
 -14   4  -3    2.40    4.30
  14   4   3    3.00    2.10
 -17   5   3    2.20    3.00
  16  -5  -3   57.99    5.40
  16   5  -3   66.49    4.90
 -16   5   3   61.09    6.30
  15  -5  -3    3.40    2.60
  15   5  -3    1.70    2.00
 -15   5   3    7.40    3.20
  14  -5  -3  112.39    8.30
  14   5  -3  102.59    7.10
 -14   5   3   79.89    8.00
  13  -5  -3   13.30    3.40
 -13   5   3   10.10    3.70
  13   5  -3   10.90    2.90
  12  -5  -3  205.88   17.60
  12  -5  -3  207.18   12.60
  12   5  -3  202.78   19.80
 -12   5   3  190.48   12.50
  12   5  -3  206.88   11.50
  11  -5  -3  190.08   15.20
  11  -5  -3  166.88   11.40
 -11   5   3  193.78   11.70
  11   5  -3  192.28   16.30
  11   5  -3  172.18   10.50
  10  -5  -3  191.38   13.50
  10   5  -3  166.38   13.70
  -9  -5   3  109.89    9.10
  -9  -5   3  107.79    9.90
   9  -5  -3  114.39    9.80
   9   5  -3  109.79   11.80
   9   5  -3  107.69    9.40
   8  -5  -3  109.99    8.40
  -8  -5   3  106.19    9.30
  -8  -5   3   91.79    8.00
   8   5  -3  100.49   10.50
   8   5  -3  110.69    8.20
  -7  -5   3   20.10    4.40
   7  -5  -3   27.00    4.60
  -7  -5   3   30.30    4.60
   7   5  -3   30.30    4.50
   7   5  -3   33.30    5.70
   6  -5  -3  245.58   13.40
  -6  -5   3  231.98   13.00
  -6  -5   3  225.68   13.70
   6   5  -3  275.77   14.60
   6   5  -3  267.17   12.70
  -5  -5   3   48.50    4.30
  -5  -5   3   48.30    4.80
   5  -5  -3   46.90    4.50
   5   5  -3   40.40    5.40
   5   5  -3   44.50    3.80
   4  -5  -3  136.89    8.00
  -4  -5   3  134.99    8.10
   4   5  -3  140.29    7.20
   4   5  -3  160.38    9.20
   3  -5  -3  151.88    8.20
  -3  -5   3  145.79    8.20
   3   5  -3  153.18    7.20
   3   5  -3  155.18    9.10
   2  -5  -3  920.91   40.00
  -2  -5   3  915.91   40.30
   2   5  -3  937.41   38.90
   2   5  -3  902.51   40.80
  -2   5   3  897.21   41.20
  -1  -5   3 1356.46   59.89
   1  -5  -3 1445.46   59.59
   1   5  -3 1331.27   60.49
  -1   5   3 1404.46   60.09
   0  -5   3    0.50    1.30
   0  -5  -3    0.40    1.00
   0   5   3    1.80    1.30
   1  -5   3 1300.27   55.39
   1  -5   3 1258.77   54.79
   2  -5   3  943.21   41.00
   3  -5   3  156.18    8.00
  -3  -5  -3  147.29    8.00
  -3  -5  -3  135.19    7.10
  -4  -5  -3  136.09    6.90
   4  -5   3  134.99    8.00
  -4  -5  -3  137.89    8.00
   5  -5   3   43.80    4.30
  -5  -5  -3   40.60    4.60
  -5  -5  -3   33.80    3.10
  -6  -5  -3  224.38   11.00
   6  -5   3  255.87   13.40
  -6  -5  -3  255.27   13.60
   6   5   3  242.28   12.80
   7  -5   3   29.70    4.90
  -7  -5  -3   31.30    5.00
   7   5   3   33.20    5.20
   8  -5   3  122.09    9.50
   8   5   3  107.29    9.00
   9  -5   3   98.89    9.30
   9   5   3   94.39    9.50
  10  -5   3  150.78   12.40
  11  -5   3  197.48   12.00
  11  -5   3  181.58   14.90
  11   5   3  181.98   10.60
  11   5   3  185.58   12.30
  12  -5   3  209.08   18.80
  12  -5   3  203.78   12.50
 -12   5  -3  222.38   13.80
  12   5   3  209.68   13.10
  12   5   3  211.68   11.80
  13  -5   3   10.40    3.10
 -13   5  -3   12.10    4.40
  13   5   3   19.30    3.10
  13   5   3   13.10    4.20
  14   5   3  111.79    9.10
  14   5   3  106.09    7.20
 -14   5  -3  113.59    9.60
  15   5   3   10.60    5.90
 -15   5  -3    1.00    3.90
 -16   5  -3   53.99    8.00
 -17   6   3   34.20    4.80
 -16   6   3    7.70    3.00
  16   6  -3    3.40    1.70
  15  -6  -3   27.00    4.10
 -15   6   3   32.10    5.60
  15   6  -3   27.00    3.90
  14  -6  -3    1.50    2.80
 -14   6   3   -0.60    2.80
  14   6  -3    0.50    2.00
  13  -6  -3    9.50    3.30
  13   6  -3   14.20    3.00
 -13   6   3    5.00    3.10
  12  -6  -3  217.58   17.40
  12  -6  -3  228.18   13.30
  12   6  -3  212.08   11.90
  12   6  -3  212.88   15.10
 -12   6   3  199.08   12.60
  11  -6  -3  137.09    9.70
  11  -6  -3  113.69   13.10
  11   6  -3  125.79    8.20
  11   6  -3   93.39   12.60
 -11   6   3  125.49    9.20
  11   6  -3  125.59   15.00
  10  -6  -3   18.40    5.90
  10   6  -3   11.90    6.40
  -9  -6   3  263.57   15.40
  -9  -6   3  265.67   17.20
   9  -6  -3  259.57   16.20
   9   6  -3  250.07   15.60
   9   6  -3  258.07   17.60
   8  -6  -3  203.18   12.40
  -8  -6   3  183.38   11.70
  -8  -6   3  196.48   13.00
   8   6  -3  200.68   13.80
   8   6  -3  178.58   11.80
   7  -6  -3   60.49    6.20
  -7  -6   3   57.59    6.30
  -7  -6   3   56.39    6.40
   7   6  -3   76.29    8.00
   7   6  -3   62.89    6.00
  -6  -6   3   16.00    3.90
   6  -6  -3   24.00    3.90
  -6  -6   3   26.00    4.30
   6   6  -3   18.30    4.00
   6   6  -3   16.50    3.10
   5  -6  -3   14.60    3.00
  -5  -6   3   14.10    3.30
  -5  -6   3   20.10    3.40
   5   6  -3   16.30    2.60
   5   6  -3   15.40    3.60
  -4  -6   3   31.00    3.70
   4  -6  -3   28.90    3.50
   4   6  -3   29.60    2.90
   4   6  -3   33.30    4.60
  -3  -6   3  169.08    9.10
   3  -6  -3  155.88    8.70
   3   6  -3  156.48    7.50
   3   6  -3  173.68    9.60
   2  -6  -3  213.58   10.40
  -2  -6   3  205.08   10.70
   2   6  -3  204.28   11.30
  -2   6   3  215.68   12.30
   1  -6  -3  322.57   15.00
  -1  -6   3  327.07   15.60
   1   6  -3  323.97   16.30
  -1   6   3  335.87   15.90
   0  -6  -3   45.50    3.10
   0  -6   3   41.00    3.50
   0   6   3   40.30    3.30
   1  -6   3  336.87   14.90
   1  -6   3  325.77   15.60
   2  -6   3  206.28   10.10
  -3  -6  -3  142.19    7.50
   3  -6   3  153.28    8.10
  -4  -6  -3   25.70    3.50
   4  -6   3   28.40    3.50
  -4  -6  -3   31.20    3.10
   5  -6   3   18.60    3.20
  -5  -6  -3   17.30    2.50
  -5  -6  -3   15.00    3.30
  -6  -6  -3   14.80    3.60
   6  -6   3   17.00    3.60
  -6  -6  -3   18.90    2.50
   7  -6   3   56.59    6.20
  -7  -6  -3   63.59    6.40
   8  -6   3  203.08   12.90
  -8  -6  -3  191.68   12.90
   9  -6   3  280.37   17.10
  10  -6   3   17.50    6.00
  11  -6   3  140.19   13.10
  11  -6   3  132.39    9.90
 -11   6  -3  119.09    9.80
  11   6   3  130.89    8.40
  11   6   3  143.99   10.50
  12  -6   3  229.58   19.20
  12  -6   3  214.48   12.70
 -12   6  -3  200.28   13.40
  12   6   3  208.68   13.20
  12   6   3  210.08   11.60
  13  -6   3    7.30    3.10
  13   6   3    8.30    2.40
  13   6   3    9.80    3.90
 -13   6  -3    3.50    3.90
 -14   6  -3    2.50    3.70
  14   6   3    7.10    3.60
 -15   6  -3   19.70    4.50
  15   6   3   20.20    4.00
 -16   6  -3    7.80    4.00
 -17   6  -3   35.00    6.10
 -17   7   3   24.80    4.20
 -16   7   3   10.80    3.00
  15  -7  -3    3.50    2.60
  15   7  -3    6.00    2.20
 -15   7   3    2.40    2.90
  14  -7  -3   42.20    6.00
 -14   7   3   45.30    5.90
  14   7  -3   47.40    4.70
  13  -7  -3    9.00    3.50
  13   7  -3    6.90    4.30
  13   7  -3    5.00    2.40
 -13   7   3    5.70    3.40
  12  -7  -3   43.00    6.10
  12  -7  -3   32.20    8.80
  12   7  -3   21.80    5.00
  12   7  -3   29.10    4.50
 -12   7   3   27.00    4.60
  11  -7  -3  441.26   25.40
  11  -7  -3  458.25   22.20
  11   7  -3  412.56   20.30
  11   7  -3  391.26   21.60
 -11   7   3  407.66   21.20
  10  -7  -3  456.15   25.00
  -9  -7   3   50.59    7.40
   9  -7  -3   55.79    8.10
  -9  -7   3   50.79    8.70
   9   7  -3   60.69    8.40
   9   7  -3   60.09    9.40
  -8  -7   3    0.90    4.20
  -8  -7   3    4.80    3.90
   8  -7  -3   -0.90    3.40
   8   7  -3   -1.50    4.40
   8   7  -3    3.80    4.10
   7  -7  -3   69.19    6.50
  -7  -7   3   73.29    7.60
  -7  -7   3   58.69    6.70
   7   7  -3   66.59    7.70
   7   7  -3   65.99    6.20
   6  -7  -3  126.29    9.00
  -6  -7   3  149.59    9.10
  -6  -7   3  134.49    9.50
   6   7  -3  132.59    8.00
   6   7  -3  133.99    9.70
   5  -7  -3  637.54   29.80
  -5  -7   3  660.63   29.90
  -5  -7   3  680.83   30.80
   5   7  -3  635.44   28.40
   5   7  -3  591.94   30.10
  -4  -7   3  849.12   38.20
   4  -7  -3  844.42   38.00
   4   7  -3  826.22   36.50
   4   7  -3  862.41   38.70
   3  -7  -3   18.70    2.80
  -3  -7   3   21.50    3.20
   3   7  -3   18.40    3.40
  -2  -7   3 1263.97   57.79
   2  -7  -3 1338.67   57.39
   2   7  -3 1343.17   58.39
  -2   7   3 1344.87   58.79
  -1  -7   3   98.09    6.00
   1  -7  -3   91.19    5.40
  -1   7   3  104.29    6.80
   1   7  -3   80.59    6.50
   0  -7   3  767.02   33.90
   0  -7  -3  705.83   33.10
   0   7   3  798.02   33.10
   1  -7   3   87.49    5.50
  -1  -7  -3   77.09    4.60
   1  -7   3   78.29    4.50
   2  -7   3 1311.17   56.69
  -3  -7  -3   19.60    2.70
   3  -7   3   18.70    3.00
  -4  -7  -3  840.12   37.00
  -4  -7  -3  868.91   38.20
   4  -7   3  805.42   37.60
  -5  -7  -3  623.84   29.30
   5  -7   3  644.24   30.50
  -5  -7  -3  706.93   31.20
  -6  -7  -3  115.79    7.20
  -6  -7  -3  131.99    9.00
   6  -7   3  131.59    8.80
  -7  -7  -3   65.99    7.20
   7  -7   3   58.79    6.60
  -8  -7  -3    8.00    4.20
   8  -7   3    5.90    3.90
   9  -7   3   51.99    7.90
  10  -7   3  460.85   26.00
  11  -7   3  443.96   25.80
  11  -7   3  433.76   22.30
 -11   7  -3  415.86   22.40
  11   7   3  451.85   22.60
  11   7   3  434.46   20.70
  12  -7   3   30.30    4.80
  12  -7   3   35.60   10.90
  12   7   3   34.40    5.30
 -12   7  -3   20.50    4.60
  12   7   3   31.90    4.50
  13   7   3   14.50    2.70
  13   7   3   13.90    3.90
  14   7   3   29.80    4.60
 -14   7  -3   46.90    6.50
 -15   7  -3    9.00    3.40
  15   7   3    2.40    3.60
 -16   7  -3   17.10    3.80
 -17   7  -3   34.90    5.40
 -17   8   3    0.00    2.10
 -16   8   3    0.00    2.30
  15   8  -3  134.09    7.60
  14  -8  -3    3.30    2.90
 -14   8   3    6.20    3.10
  14   8  -3    8.70    2.20
  13  -8  -3    0.40    3.20
 -13   8   3   -0.70    2.50
  13   8  -3    3.90    3.70
  13   8  -3    2.90    2.20
  12  -8  -3   18.70    9.70
  12  -8  -3   18.20    4.30
  12   8  -3   16.90    4.60
 -12   8   3   16.60    3.80
  12   8  -3   18.60    3.10
  11  -8  -3  167.48   14.40
  11  -8  -3  149.09   11.00
  11   8  -3  156.38    9.40
 -11   8   3  175.48   10.70
  11   8  -3  152.28   11.10
  10  -8  -3  138.99   13.00
 -10  -8   3  143.09   13.30
  10   8  -3  134.79    8.50
 -10   8   3  156.48    9.80
  -9  -8   3  236.78   15.70
   9  -8  -3  197.78   13.50
  -9  -8   3  160.58   13.80
  -8  -8   3   95.29    8.40
   8  -8  -3   87.79    8.60
  -8  -8   3   70.99    8.50
   8   8  -3   95.19    8.50
   8   8  -3   76.59    9.20
   7  -8  -3   74.99    7.10
  -7  -8   3   85.29    8.50
  -7  -8   3   78.59    7.40
   7   8  -3   84.39    8.60
   7   8  -3   85.29    7.20
  -6  -8   3  188.18   11.80
  -6  -8   3  181.58   11.00
   6  -8  -3  172.88   10.80
   6   8  -3  156.98   11.30
   6   8  -3  177.68    9.70
   5  -8  -3  327.27   17.10
  -5  -8   3  333.87   17.40
   5   8  -3  352.56   17.80
  -4  -8   3  145.19    8.80
   4  -8  -3  142.89    8.70
   4   8  -3  138.69    9.10
   3  -8  -3 1520.45   67.59
  -3  -8   3 1585.64   68.09
  -3   8   3 1483.55   69.79
   3   8  -3 1620.24   68.39
  -2  -8   3  250.07   12.80
   2  -8  -3  253.17   12.20
  -2   8   3  226.08   14.20
   2   8  -3  249.97   13.30
   1  -8  -3  747.73   33.40
  -1  -8   3  739.03   34.10
   1   8  -3  775.62   34.90
  -1   8   3  769.02   34.20
   0  -8   3  464.75   21.70
   0  -8  -3  452.25   20.80
   0   8   3  471.95   20.90
   1  -8   3  746.73   32.90
  -1  -8  -3  706.33   31.90
   1  -8   3  725.83   31.60
   2  -8   3  222.58   10.90
  -3  -8  -3 1568.14   67.09
   3  -8   3 1524.75   67.19
  -4  -8  -3  149.49    9.20
  -4  -8  -3  140.89    8.30
   4  -8   3  151.08    8.90
  -5  -8  -3  349.77   17.30
   5  -8   3  360.46   18.30
  -5  -8  -3  370.96   18.70
  -6  -8  -3  174.38   10.90
   6  -8   3  169.78   10.60
  -6  -8  -3  156.18    9.30
   7  -8   3   72.19    7.50
  -7  -8  -3   83.99    7.80
  -8  -8  -3   99.19    9.20
   8  -8   3   98.39    9.50
  -9  -8  -3  185.08   14.20
   9  -8   3  208.48   14.20
  10  -8   3  151.08   11.20
  10  -8   3  150.08   13.30
  10   8   3  166.38   11.30
 -10   8  -3  182.08   13.40
  11  -8   3  155.88   10.70
  11  -8   3  153.48   15.90
  11   8   3  135.79    8.70
  11   8   3  157.48   10.80
 -11   8  -3  152.38   10.70
  12  -8   3   25.10   10.80
  12   8   3   16.30    2.70
  12   8   3   16.60    4.10
 -12   8  -3   15.40    4.40
 -13   8  -3   11.40    3.60
  13   8   3    2.70    3.30
 -14   8  -3    6.30    3.10
  14   8   3    5.10    3.30
  15   8   3  136.39    9.10
 -15   8  -3  142.59    9.60
 -16   8  -3    2.20    2.80
 -17   8  -3    1.50    2.60
 -17   9   3   18.80    2.90
 -16   9   3    0.80    2.00
  15   9  -3    2.80    1.60
 -15   9   3   -3.70    2.20
  14  -9  -3    5.50    3.20
  14   9  -3    2.30    3.60
  14   9  -3    2.10    1.80
 -14   9   3    1.80    2.70
  13  -9  -3   12.10    3.70
  13   9  -3    1.10    3.50
 -13   9   3   12.60    3.20
  13   9  -3    8.00    2.40
  12  -9  -3  103.49    9.20
 -12   9   3  106.79    8.20
  12   9  -3   96.09    6.70
  12   9  -3   89.99    8.70
  11  -9  -3    0.70    8.20
  11  -9  -3    9.20    4.00
  11   9  -3    7.70    3.90
  11   9  -3   11.60    2.60
 -11   9   3    8.70    3.60
 -10  -9   3   88.49   11.10
  10  -9  -3   54.49    9.10
  10  -9  -3   82.39   10.00
  10   9  -3   73.59    7.50
 -10   9   3   73.39    6.90
  10   9  -3   78.89    6.00
  -9  -9   3  303.97   19.10
   9  -9  -3  274.67   17.90
  -8  -9   3   56.59    8.70
   8  -9  -3   64.19    8.10
  -8  -9   3   67.59    8.20
   8   9  -3   56.89    8.50
   7  -9  -3   53.09    6.40
  -7  -9   3   61.19    7.30
  -7  -9   3   57.19    7.20
   7   9  -3   69.29    8.00
  -6  -9   3  222.88   14.20
   6  -9  -3  206.28   13.00
  -6  -9   3  227.58   13.60
   6   9  -3  264.47   14.10
  -5  -9   3 1152.78   50.59
   5  -9  -3 1122.19   50.19
   5   9  -3 1070.19   50.29
  -4  -9   3  408.96   19.80
   4  -9  -3  390.46   19.30
   4   9  -3  383.46   19.80
   3  -9  -3  537.15   25.20
  -3  -9   3  588.84   25.90
  -3   9   3  516.45   28.20
   3   9  -3  523.65   25.70
  -2  -9   3  528.55   25.50
   2  -9  -3  541.35   24.80
   2   9  -3  556.34   25.90
  -2   9   3  539.85   26.60
  -1  -9   3  545.75   27.10
   1  -9  -3  578.54   26.30
   1   9  -3  626.14   28.00
  -1   9   3  590.04   27.20
   0  -9  -3   72.09    4.70
   0  -9   3   80.29    5.80
   0   9   3   78.39    5.20
   1  -9   3  592.44   27.30
   1  -9   3  576.64   25.70
  -1  -9  -3  585.04   26.00
   2  -9   3  549.15   25.00
  -2  -9  -3  559.64   24.80
   3  -9   3  528.65   24.20
  -3  -9  -3  518.45   24.30
  -4  -9  -3  379.76   18.70
   4  -9   3  395.66   19.10
  -5  -9  -3 1105.19   48.80
  -5  -9  -3 1043.30   47.20
   5  -9   3 1042.40   48.00
  -6  -9  -3  271.27   15.20
   6  -9   3  259.77   14.60
  -6  -9  -3  246.18   13.60
   7  -9   3   40.60    6.50
  -7  -9  -3   60.29    7.00
  -8  -9  -3   51.89    8.00
   8  -9   3   64.99    7.80
   9  -9   3  297.77   19.10
  -9  -9  -3  305.57   19.80
  10  -9   3   85.39   12.10
  10  -9   3   70.59    7.50
  10   9   3   84.39    7.80
 -10   9  -3   65.99    7.70
  10   9   3   73.29    9.00
  11  -9   3   -1.10    8.60
  11   9   3    2.80    3.60
  12  -9   3   58.69   13.00
 -12   9  -3   91.59    8.20
  12   9   3  103.39    6.30
  12   9   3   87.89    8.10
 -13   9  -3   11.10    3.50
  13   9   3   10.90    3.90
  14   9   3    0.70    2.90
 -14   9  -3    3.70    3.10
  15   9   3    1.80    2.70
 -15   9  -3   -3.90    2.80
  16   9   3    1.10    3.00
 -16   9  -3    1.30    2.60
 -17   9  -3   15.40    2.90
 -16  10   3   23.10    4.00
 -15  10   3   74.89    6.30
 -14  10   3    2.30    2.40
  14  10  -3    2.30    3.50
  14  10  -3    4.00    2.00
  13 -10  -3   14.30    4.20
 -13  10   3   15.40    3.40
  13  10  -3   13.70    3.90
  13  10  -3   15.90    2.50
  12 -10  -3   48.90    7.60
  12  10  -3   42.70    6.90
  12  10  -3   61.29    5.20
 -12  10   3   66.99    6.30
  11 -10  -3   88.09   13.70
  11 -10  -3   77.29    8.80
  11  10  -3   70.39    7.80
 -11  10   3   86.69    7.40
  11  10  -3  100.59    6.40
  10 -10  -3  446.76   26.10
 -10 -10   3  495.75   28.50
  10 -10  -3  417.96   23.80
  10  10  -3  431.26   21.40
  10  10  -3  481.85   23.20
 -10  10   3  484.75   22.80
   9 -10  -3   95.79   10.80
  -9 -10   3   99.89   11.10
  -9  10   3  102.69    7.70
  -8 -10   3   98.49   10.80
   8 -10  -3   79.69    9.30
  -8 -10   3  101.29   10.20
   8  10  -3   87.29    9.60
   7 -10  -3   76.39    7.60
  -7 -10   3   78.39    8.90
  -7 -10   3   85.49    9.40
   7  10  -3   74.39    8.30
  -6 -10   3   46.40    6.70
   6 -10  -3   44.10    6.20
  -6 -10   3   42.50    6.40
   6  10  -3   61.19    6.70
   5 -10  -3   91.89    7.10
  -5 -10   3   87.59    7.80
   5  10  -3   81.59    7.40
  -4 -10   3 1271.87   56.49
   4 -10  -3 1162.38   55.59
   4  10  -3 1311.37   56.29
  -4  10   3 1277.47   60.49
   3 -10  -3  844.32   36.40
  -3 -10   3  785.92   36.90
  -3  10   3  765.62   39.30
   3  10  -3  800.82   36.90
  -2 -10   3 2015.00   87.29
   2 -10  -3 1968.00   86.29
   2  10  -3 2041.90   87.49
  -2  10   3 1964.60   87.79
   1 -10  -3   54.89    4.50
  -1 -10   3   60.99    5.30
   1  10  -3   65.29    6.30
  -1  10   3   60.89    6.50
   0 -10  -3  166.78    8.80
   0 -10   3  169.08    9.90
   0  10  -3  165.38   10.80
   0  10   3  169.48    9.00
  -1 -10  -3   64.99    4.50
   1 -10   3   66.19    5.60
   1 -10   3   56.99    4.20
  -2 -10  -3 2019.80   85.59
  -2 -10  -3 1951.70   84.49
   2 -10   3 1938.81   84.69
  -3 -10  -3  721.33   33.60
   3 -10   3  752.02   33.30
   4 -10   3 1249.88   54.89
  -4 -10  -3 1222.78   54.69
   5 -10   3   80.09    7.10
  -5 -10  -3   74.49    7.00
  -5 -10  -3   91.09    7.50
  -6 -10  -3   54.29    6.60
  -6 -10  -3   54.59    6.80
   6 -10   3   56.79    6.40
   7 -10   3   92.69    9.00
  -7 -10  -3   85.69    9.00
   8 -10   3   90.79    9.50
  -8 -10  -3   98.59   10.70
   9 -10   3   93.99   11.70
  -9 -10  -3   97.69   11.80
   9  10   3   88.29    8.70
  10 -10   3  485.15   27.50
  10  10   3  414.46   21.20
 -10  10  -3  472.05   23.40
  10  10   3  487.25   23.50
  11 -10   3   89.79   14.80
 -11  10  -3   88.19    8.00
  11  10   3   82.89    6.20
  11  10   3   98.59    8.70
  12  10   3   50.69    6.50
 -12  10  -3   53.99    6.70
  13  10   3   12.80    3.80
 -13  10  -3   22.30    4.10
  14  10   3    6.90    3.10
 -14  10  -3    2.20    2.80
  15  10   3   73.09    6.30
 -15  10  -3   70.89    6.90
  16  10   3   21.60    3.30
 -16  10  -3   17.30    3.10
 -16  11   3   25.40    3.60
 -15  11   3    9.00    2.70
 -14  11   3    7.00    2.70
  14  11  -3   10.30    3.40
  14  11  -3    3.30    1.70
  13  11  -3    6.60    3.40
 -13  11   3   14.10    3.40
 -13  11   3    1.30    3.00
  13  11  -3    9.50    2.20
  12 -11  -3   46.70    7.40
  12  11  -3   45.00    6.70
  12  11  -3   58.09    4.80
 -12  11   3   55.39    6.00
  11 -11  -3  120.59   10.90
  11  11  -3  119.39    9.50
  11  11  -3  129.89    7.70
 -11  11   3  136.69    9.00
  10 -11  -3  185.88   15.20
 -10 -11   3  202.78   18.00
  10 -11  -3  169.48   12.60
  10  11  -3  166.28   11.40
 -10  11   3  185.68   11.00
  10  11  -3  167.28    9.70
   9 -11  -3   32.90    7.30
  -9 -11   3   22.30    7.50
   9  11  -3   31.60    4.30
   9  11  -3   24.90    4.60
   9  11  -3   22.20    4.20
  -9  11   3   25.00    4.10
   8 -11  -3  241.68   16.20
  -8 -11   3  239.58   17.10
  -8 -11   3  263.67   17.10
   8  11  -3  241.28   15.70
  -7 -11   3  100.49   10.60
   7 -11  -3  102.79    9.50
  -7 -11   3  108.49   10.50
   7  11  -3   92.49    9.20
  -6 -11   3  193.58   12.80
  -6 -11   3  190.48   13.20
   6 -11  -3  170.28   12.00
   6  11  -3  193.18   12.10
  -5 -11   3   12.90    4.20
   5 -11  -3   16.10    3.80
   5  11  -3   10.90    3.60
   4 -11  -3  120.19    8.50
  -4 -11   3  123.49    9.30
   4  11  -3  124.09    8.90
   3 -11  -3 1013.70   45.00
  -3 -11   3 1033.10   46.00
   3  11  -3 1017.40   45.60
  -3  11   3  950.00   47.90
   2 -11  -3 1790.02   80.19
  -2 -11   3 1872.01   81.39
   2  11  -3 1867.71   81.39
  -2  11   3 1869.41   81.79
  -1 -11   3   29.10    4.40
   1 -11  -3   27.90    3.90
  -1  11   3   38.40    6.00
   1  11  -3   31.50    5.00
   0 -11   3    6.30    2.70
   0 -11  -3    8.00    2.30
   0  11  -3    4.80    3.50
   0  11   3   10.50    2.60
  -1 -11  -3   31.90    3.50
   1 -11   3   36.20    4.70
   1 -11   3   26.70    3.50
  -2 -11  -3 1941.01   80.09
   2 -11   3 1744.13   78.69
   2 -11   3 1860.51   80.59
  -2 -11  -3 1769.62   78.39
  -3 -11  -3 1045.30   45.10
  -3 -11  -3  984.00   43.50
   3 -11   3  962.40   44.30
   4 -11   3  116.79    8.40
  -4 -11  -3  126.39    8.50
   5 -11   3   20.70    4.50
  -5 -11  -3   17.00    4.30
  -6 -11  -3  203.98   13.10
  -6 -11  -3  188.08   12.30
   6 -11   3  180.28   12.60
   7 -11   3  113.39   10.10
  -7 -11  -3   90.99   10.20
   8 -11   3  223.38   16.40
  -8 -11  -3  259.67   17.50
  -9 -11  -3   19.10    7.10
   9 -11   3   16.50    7.60
  -9  11  -3   32.00    5.00
   9  11   3   33.50    5.10
  10 -11   3  197.68   17.40
 -10  11  -3  180.88   11.80
  10  11   3  186.88   12.10
  11 -11   3  122.69   17.10
 -11  11  -3  125.29    9.40
  11  11   3  118.79    9.60
  12  11   3   56.39    6.70
 -12  11  -3   55.29    6.50
  13  11   3    2.50    3.30
 -13  11  -3   14.20    3.40
 -14  11  -3   -0.20    2.50
  14  11   3    7.40    3.10
 -15  11  -3    6.80    2.70
  15  11   3   11.70    3.00
  16  11   3   22.60    3.20
 -16  11  -3   29.70    3.90
 -16  12   3    2.00    1.80
 -15  12   3  113.69    7.70
  15  12  -3  115.39    7.80
  14  12  -3    6.00    3.10
 -14  12   3    5.80    2.50
 -13  12   3   37.80    5.00
  13  12  -3   40.20    5.80
  13  12  -3   31.00    3.60
 -13  12   3   30.30    4.20
 -12  12   3    9.60    3.00
  12  12  -3   14.70    2.40
 -12  12   3    3.20    3.20
  12  12  -3    7.60    3.50
 -11 -12   3   24.10   13.10
  11 -12  -3   15.50    4.80
  11 -12  -3   26.30   12.00
  11  12  -3   23.90    3.80
  11  12  -3   32.70    5.40
 -11  12   3   19.00    3.50
 -10 -12   3   49.60   10.80
  10 -12  -3   28.10    9.30
  10  12  -3   48.00    6.30
  10  12  -3   48.90    4.80
 -10  12   3   55.39    5.70
  -9 -12   3  101.19   12.70
   9 -12  -3   96.39   12.10
   9  12  -3  104.49    8.50
  -9  12   3  102.69    7.70
   9  12  -3  101.59    6.80
   9  12  -3  111.59    8.90
  -8 -12   3    5.60    7.60
  -8 -12   3    9.60    6.10
   8 -12  -3    0.20    5.50
  -8  12   3    1.70    2.60
   8  12  -3    6.10    3.90
   8  12  -3    5.50    4.90
   7 -12  -3   52.69    8.50
  -7 -12   3   67.29    9.70
  -7 -12   3   82.79    9.60
   7  12  -3   64.29    8.20
  -6 -12   3  155.08   11.80
  -6 -12   3  156.88   12.20
   6 -12  -3  140.29   10.80
   6  12  -3  136.99   10.30
  -5 -12   3   93.69    8.50
   5 -12  -3   95.69    8.50
   5  12  -3  103.99    8.20
   4 -12  -3   66.09    6.60
  -4 -12   3   56.39    6.50
   4  12  -3   69.29    6.70
  -3 -12   3  138.09   10.10
   3 -12  -3  134.29    9.10
   3  12  -3  160.38    9.90
  -3  12   3  154.08   14.60
   2 -12  -3   19.10    3.60
  -2 -12   3   19.10    4.00
  -2  12   3   23.00    6.10
   2  12  -3   26.30    4.60
   1 -12  -3   29.30    4.30
  -1 -12   3   29.90    4.70
   1  12  -3   38.00    6.00
  -1  12   3   43.10    6.20
   0 -12   3   98.59    7.60
   0 -12  -3   89.39    6.30
   0  12   3   95.69    6.50
   0  12  -3   99.59    8.80
   0  12   3  104.79    6.30
   1 -12   3   35.90    5.30
  -1 -12  -3   31.90    3.90
  -2 -12  -3   24.50    3.70
  -2 -12  -3   26.50    4.40
   2 -12   3   24.80    4.50
   2 -12   3   27.50    4.50
   3 -12   3  146.19    9.20
  -3 -12  -3  126.79    7.80
  -3 -12  -3  158.38    9.80
  -4 -12  -3   80.99    7.40
   4 -12   3   81.59    7.30
  -4 -12  -3   73.39    8.30
  -5 -12  -3  115.99    9.50
   5 -12   3   99.69    9.00
  -5 -12  -3  105.09    9.20
  -6 -12  -3  141.99   11.60
  -6 -12  -3  156.88   11.80
   6 -12   3  149.59   11.40
   7 -12   3   55.99    9.20
  -7 -12  -3   69.79    9.90
  -8 -12  -3    0.90    6.50
   8 -12   3    4.80    6.50
  -8  12  -3    1.80    3.10
   8  12   3    3.90    3.30
  -9 -12  -3  110.99   13.90
   9 -12   3  109.09   13.60
   9 -12   3   97.79   12.30
   9  12   3   97.79    8.50
  -9  12  -3  100.59    8.30
   9  12   3  116.79    9.00
  10 -12   3   53.29   11.40
 -10  12  -3   46.90    6.00
  10  12   3   45.10    6.70
  10  12   3   46.50    6.50
  11 -12   3   18.10   12.00
 -11  12  -3   29.10    4.60
  11  12   3   29.20    4.80
 -12  12  -3   12.80    3.50
  12  12   3   11.30    3.50
 -13  12  -3   41.20    5.70
  13  12   3   42.60    6.10
  14  12   3    9.90    3.20
 -14  12  -3   10.20    3.00
  15  12   3  117.39    7.70
 -15  12  -3  117.49    8.10
  16  12   3    0.90    2.30
 -16  12  -3   -2.00    1.70
 -16  13   3    5.40    1.80
  15  13  -3    4.10    2.90
 -15  13   3    0.20    1.80
  14  13  -3    3.10    2.90
 -14  13   3    4.70    2.40
  13  13  -3   12.80    3.20
 -13  13   3    2.70    3.10
 -13  13   3    6.10    2.60
 -12  13   3   16.30    3.50
 -12  13   3   13.10    3.60
  12  13  -3   16.80    3.80
 -11  13   3   76.29    7.30
  11  13  -3   87.09    7.40
  11  13  -3   78.69    5.60
 -11  13   3   88.19    7.30
  10 -13  -3   29.10    9.50
 -10 -13   3    6.00   10.30
  10  13  -3   15.20    2.70
  10  13  -3   18.10    4.00
 -10  13   3   19.70    3.80
 -10  13   3   16.10    3.90
  -9 -13   3  963.40   46.30
  -9  13   3  863.51   39.20
  -9  13   3  795.62   39.20
   9  13  -3  806.92   37.70
   9  13  -3  861.11   40.20
   9  13  -3  876.21   39.90
  -8 -13   3   12.70    9.10
   8 -13  -3    9.70    5.80
  -8 -13   3   20.30    8.10
  -8  13   3   20.50    4.10
  -8  13   3   26.70    4.40
   8  13  -3   21.40    4.50
   8  13  -3   24.90    4.70
  -7 -13   3   -2.30    5.50
  -7 -13   3   -0.30    6.60
   7 -13  -3   11.10    5.60
   7  13  -3    4.20    4.00
   6 -13  -3   67.89    8.80
  -6 -13   3   73.99    9.20
  -6 -13   3   82.39    9.70
   6  13  -3   67.09    7.30
  -5 -13   3   32.70    6.50
   5 -13  -3   41.10    6.80
   5  13  -3   41.70    6.00
  -4 -13   3   34.70    5.80
   4 -13  -3   17.00    4.60
   4  13  -3   18.10    4.10
  -3 -13   3   20.70    4.70
   3 -13  -3   26.30    4.50
   3  13  -3   22.50    4.30
   2 -13  -3  163.58    9.60
  -2 -13   3  177.28   11.20
   2  13  -3  137.59   10.30
  -2  13   3  119.99   12.50
   1 -13  -3    8.20    3.20
  -1 -13   3    7.10    3.40
   1  13  -3    7.80    3.80
  -1  13   3    8.80    4.20
   0 -13  -3  147.29    9.10
   0 -13   3  164.08   10.80
   0  13  -3  173.38   11.90
   0  13   3  160.48    8.70
   0  13   3  154.88    8.50
  -1 -13  -3    0.80    2.80
   1 -13   3    8.90    3.60
   2 -13   3  103.49    7.80
   2 -13   3  124.89    9.40
  -2 -13  -3  136.29    9.30
   3 -13   3   19.10    4.60
   3 -13   3   18.40    4.30
  -3 -13  -3   12.90    4.30
  -4 -13  -3   26.00    5.00
   4 -13   3   17.10    4.80
  -5 -13  -3   43.40    7.80
  -5 -13  -3   43.50    6.90
   5 -13   3   42.80    6.40
  -6 -13  -3   66.09    9.50
   6 -13   3   61.69    9.10
  -6 -13  -3   65.89   10.30
   7 -13   3   -5.60    6.00
  -7 -13  -3    5.80    5.70
  -8 -13  -3   24.80    7.60
   8 -13   3   22.30    8.10
   8 -13   3   25.60    7.80
   8  13   3   17.20    4.10
   8  13   3   17.70    4.60
  -8  13  -3   18.70    3.60
   9 -13   3  852.01   44.50
   9 -13   3  856.91   44.00
   9  13   3  879.41   40.90
   9  13   3  901.81   41.20
  -9  13  -3  898.91   40.80
  10 -13   3    7.70   10.30
  10  13   3   14.10    3.90
 -10  13  -3   12.60    3.50
  10  13   3   10.30    3.70
  11  13   3   95.59    8.40
 -11  13  -3   91.49    7.90
 -12  13  -3   16.10    3.40
  12  13   3   19.00    4.10
  13  13   3    4.50    3.10
 -13  13  -3    3.50    2.50
 -14  13  -3   -0.90    2.20
  14  13   3   -1.00    2.40
 -15  13  -3    3.50    2.10
  15  13   3    4.70    2.30
 -16  13  -3    4.00    2.00
  16  13   3    6.10    2.20
 -15  14   3   14.20    2.60
  15  14  -3   11.60    3.00
  14  14  -3   38.60    5.20
 -14  14   3   42.20    4.70
 -13  14   3    4.90    3.30
  13  14  -3    1.80    2.70
 -13  14   3   -0.40    2.00
 -12  14   3   19.70    3.40
 -12  14   3   13.40    3.60
  12  14  -3   13.10    3.50
  11  14  -3   36.70    5.60
 -11  14   3   34.80    6.10
 -11  14   3   45.20    5.30
 -10 -14   3   92.69   16.30
  10 -14  -3   65.39   13.40
 -10  14   3  117.29    8.00
  10  14  -3  105.39    8.40
 -10  14   3   88.79    8.20
  -9 -14   3   19.20    9.70
   9 -14  -3   12.40    9.10
   9  14  -3   37.50    5.60
  -9  14   3   31.30    4.90
   9  14  -3   29.10    4.30
   9  14  -3   34.20    5.60
  -9  14   3   26.80    4.40
   8 -14  -3   -1.10    7.00
  -8 -14   3    9.30    7.00
   8  14  -3    4.60    2.50
   8  14  -3    4.70    3.40
  -8  14   3    3.90    2.60
   8  14  -3    0.80    2.70
  -8  14   3    4.00    3.00
  -7 -14   3  176.28   14.90
   7 -14  -3  162.88   14.10
  -7 -14   3  216.78   17.10
   7  14  -3  163.78   11.60
   7  14  -3  169.88   10.60
  -7  14   3  167.38   10.10
  -7  14   3  171.68   13.20
  -7  14   3  174.88   10.70
  -6 -14   3   57.49    8.80
  -6 -14   3   54.49    9.00
   6 -14  -3   47.20    7.50
   6  14  -3   48.90    6.60
   5 -14  -3    4.80    4.70
  -5 -14   3    5.40    5.50
   5  14  -3    4.10    3.40
   4 -14  -3    6.50    4.20
  -4 -14   3    4.30    4.40
   4  14  -3   -0.20    3.20
   3 -14  -3   35.40    5.40
  -3 -14   3   31.60    6.20
   3  14  -3   37.30    6.00
   2 -14  -3   87.29    7.90
  -2 -14   3  107.29    9.10
   2  14  -3   95.19    8.30
  -2  14   3   96.49   11.70
   1 -14  -3   95.89    7.40
  -1  14   3   79.89    8.40
   1  14  -3   84.79    8.50
   0 -14  -3   78.09    7.20
   0 -14   3   94.59    8.80
   0  14   3   99.79    5.50
   0  14  -3  105.09    9.60
   0  14   3   91.79    5.30
  -1 -14  -3   91.59    8.10
   1 -14   3   93.59    8.50
  -1  14  -3  106.79   10.20
  -2 -14  -3   92.89    8.60
   2 -14   3   94.19    8.50
   3 -14   3   34.70    6.20
  -3 -14  -3   44.10    7.10
   3 -14   3   32.70    5.20
  -4 -14  -3   -4.90    4.50
   4 -14   3    2.80    4.70
   4 -14   3    2.80    5.00
   5 -14   3    4.60    6.00
   5 -14   3    2.10    4.50
  -5 -14  -3    7.00    5.60
  -5 -14  -3   10.00    6.10
   6 -14   3   34.50    7.70
   6 -14   3   49.00    8.10
  -6 -14  -3   40.10    9.10
  -6 -14  -3   33.50    8.10
   7 -14   3  180.98   15.70
  -7 -14  -3  183.38   15.70
   7 -14   3  186.88   14.60
  -7  14  -3  192.78   11.20
   7  14   3  164.88   11.20
   7  14   3  171.68   11.50
  -8 -14  -3   10.70    8.50
   8 -14   3   10.80    8.10
   8 -14   3   11.20    8.30
   8  14   3    6.30    3.30
   8  14   3    5.70    3.90
  -8  14  -3    2.70    2.90
   9 -14   3   33.50   10.60
   9 -14   3   18.40   10.50
  -9 -14  -3   37.00   11.20
   9  14   3   22.80    4.30
   9  14   3   14.50    4.50
  -9  14  -3   32.10    5.20
  10  14   3  111.69    8.60
 -10  14  -3   93.09    8.10
  10  14   3   94.79    8.50
 -11  14  -3   54.99    6.20
  11  14   3   58.29    6.60
 -12  14  -3   24.20    4.10
  12  14   3   21.70    4.00
  13  14   3   -0.10    2.50
 -13  14  -3   -3.60    2.30
 -14  14  -3   40.40    4.80
  14  14   3   47.30    5.20
  15  14   3   10.40    2.60
 -15  14  -3   19.40    3.40
  15  15  -3   12.50    2.60
 -15  15   3    8.80    2.00
  14  15  -3   11.30    2.90
 -14  15   3    6.70    2.20
 -13  15   3    4.00    2.10
  13  15  -3   -0.90    2.40
 -12  15   3   14.20    3.20
  12  15  -3   14.40    3.50
 -11  15   3   99.99    7.40
 -11  15   3   84.59    7.70
  11  15  -3   95.79    8.00
  10  15  -3   40.50    5.80
 -10  15   3   39.90    5.30
 -10  15   3   36.70    5.10
   9 -15  -3   25.80   11.20
  -9 -15   3   47.40   11.90
   9  15  -3   65.29    6.50
  -9  15   3   51.69    5.70
   9  15  -3   63.29    6.90
  -9  15   3   52.29    6.70
  -8 -15   3   56.09   11.70
   8 -15  -3   63.89   10.80
   8  15  -3   57.49    6.90
   8  15  -3   43.90    6.20
  -8  15   3   50.09    5.60
  -8  15   3   47.80    6.30
   7 -15  -3  147.79   14.80
  -7 -15   3  168.38   15.30
  -7 -15   3  189.78   17.90
   7  15  -3  140.89   10.70
  -7  15   3  161.68   10.10
   7  15  -3  156.08   10.20
  -7  15   3  132.89   10.10
  -7  15   3  139.19    9.20
  -6 -15   3  117.29   12.30
  -6 -15   3  118.39   13.50
   6 -15  -3  125.79   12.90
  -6  15   3  117.39    7.70
   6  15  -3  109.59    8.30
   6  15  -3  121.59    9.30
  -6  15   3  108.19    8.00
  -5 -15   3   29.60    7.40
   5 -15  -3   22.40    6.70
   5  15  -3   28.20    5.00
   4 -15  -3   36.30    6.70
  -4 -15   3   38.40    7.60
   4  15  -3   39.80    5.70
  -3 -15   3    1.60    4.40
   3 -15  -3    2.20    5.00
  -3  15   3   -6.50    9.80
   3  15  -3   -0.40    3.40
   2 -15  -3   13.30    4.90
  -2 -15   3   19.50    5.70
   2  15  -3   21.40    4.80
  -2  15   3   28.00    7.20
  -1 -15   3   81.09    9.10
  -1  15   3   72.49    7.00
   1  15  -3   80.59    8.40
  -1  15   3   80.59    8.00
   0 -15   3    8.60    4.50
   0  15  -3    3.60    4.60
   1 -15   3   71.29    8.90
  -1 -15  -3   77.79    8.60
  -1  15  -3   82.49    9.90
   2 -15   3   29.80    6.30
  -2 -15  -3   25.10    6.10
  -3 -15  -3   -5.80    4.70
   3 -15   3    0.40    4.80
  -4 -15  -3   36.00    7.00
   4 -15   3   31.90    6.50
  -5 -15  -3   17.00    6.20
   5 -15   3   24.30    7.60
   5 -15   3   27.00    6.70
  -5 -15  -3   21.40    7.90
   6 -15   3  113.79   12.70
   6 -15   3  109.89   14.10
  -6 -15  -3  130.49   13.70
  -6  15  -3  129.59    8.90
   6  15   3  117.59    9.60
   6  15   3  127.69    9.30
  -7 -15  -3  140.09   15.90
   7 -15   3  167.18   17.60
   7 -15   3  155.88   15.40
   7  15   3  173.88   11.00
   7  15   3  159.88   10.80
  -7  15  -3  155.58   10.30
  -8 -15  -3   42.50   11.40
   8 -15   3   52.09   10.80
   8 -15   3   53.49   12.50
   8  15   3   64.89    7.30
   8  15   3   57.89    6.90
  -8  15  -3   57.39    6.10
   9 -15   3   61.59   12.70
   9 -15   3   26.10   13.60
  -9 -15  -3   66.79   13.60
   9  15   3   52.09    6.50
  -9  15  -3   61.19    6.30
   9  15   3   59.89    7.40
  10  15   3   43.50    6.40
 -10  15  -3   36.20    5.60
  10  15   3   46.90    6.40
 -11  15  -3   98.29    8.10
  11  15   3  108.09    8.80
 -12  15  -3   15.70    3.30
  13  15   3    4.70    2.70
 -13  15  -3    4.00    2.50
  14  15   3   10.80    2.70
 -14  15  -3    7.00    2.30
  15  15   3    6.50    2.10
 -15  15  -3    5.90    2.00
  15  16  -3    2.90    3.50
 -15  16   3    1.60    1.40
  14  16  -3   38.30    4.60
 -14  16   3   53.39    4.50
 -13  16   3   24.50    3.80
  13  16  -3   23.50    3.60
  12  16  -3    6.90    2.90
 -12  16   3    3.80    3.10
 -12  16   3    0.70    2.10
  11  16  -3   17.50    4.00
 -11  16   3   25.20    4.30
 -11  16   3   16.20    3.70
 -10  16   3   59.09    5.60
  10  16  -3   51.39    6.40
 -10  16   3   46.40    6.30
  -9  16   3   40.10    6.10
  -9  16   3   43.50    5.10
   9  16  -3   51.99    6.20
   9  16  -3   38.20    5.90
  -8 -16   3   87.99   14.30
   8 -16  -3   88.29   13.60
  -8  16   3   81.89    6.40
   8  16  -3   77.49    7.80
  -8  16   3   65.29    7.10
   8  16  -3   73.19    7.30
  -7 -16   3   47.30   11.00
   7 -16  -3   32.50   10.80
  -7 -16   3   39.00   12.40
  -7  16   3   33.10    5.00
  -7  16   3   35.20    5.60
   7  16  -3   39.00    5.60
   7  16  -3   39.00    6.30
  -7  16   3   38.40    5.00
  -6 -16   3   88.69   14.20
  -6 -16   3  121.39   14.10
   6 -16  -3   90.99   14.20
  -6  16   3   90.69    6.90
   6  16  -3   94.39    8.50
  -6  16   3   90.99    7.40
  -6  16   3   97.29    7.80
   6  16  -3   91.49    8.00
  -5 -16   3   50.59    9.30
   5 -16  -3   63.09    9.80
  -5  16   3   75.09    6.20
   5  16  -3   77.49    6.50
  -5  16   3   67.89    5.90
   5  16  -3   66.19    7.50
  -5  16   3   72.09    7.00
   4 -16  -3   30.20    7.60
  -4 -16   3   41.80    8.30
   4  16  -3   52.19    5.00
  -3 -16   3  143.79   12.40
   3  16  -3  148.09    9.60
  -2 -16   3   14.80    5.80
   2  16  -3   15.70    4.40
  -2  16   3   10.10    6.90
  -1 -16   3  495.35   27.10
  -1  16   3  513.65   23.60
  -1  16   3  493.65   23.70
   1  16  -3  516.45   25.90
   0 -16   3   86.99    9.50
   0 -16  -3   99.39   10.20
   0  16  -3  102.79   10.30
  -1 -16  -3  522.75   27.40
   1 -16   3  518.35   28.10
  -1  16  -3  518.35   28.00
  -2 -16  -3   14.10    5.70
   2 -16   3   14.00    6.10
  -2  16  -3   14.50    6.30
   3 -16   3  144.69   13.40
  -3 -16  -3  160.38   13.00
  -4 -16  -3   35.50    8.10
   4 -16   3   58.19    9.20
   5 -16   3   82.39   10.60
  -5 -16  -3   68.29   11.50
  -5 -16  -3   60.29   10.20
   5  16   3   74.69    7.20
  -5  16  -3   76.59    6.80
   5  16   3   76.89    7.10
  -6 -16  -3   81.29   13.20
   6 -16   3  101.19   11.80
  -6  16  -3   79.29   11.20
   6  16   3  105.09    8.40
  -6  16  -3   92.79    7.40
   6  16   3   90.29    8.20
  -7 -16  -3   22.40    9.70
   7 -16   3   39.90   10.00
   7  16   3   41.90    6.30
   7  16   3   39.30    6.00
  -7  16  -3   29.90    5.20
  -8 -16  -3   67.39   13.00
   8 -16   3  114.89   16.00
  -8  16  -3   72.19    6.70
   8  16   3   71.99    7.30
   8  16   3   78.89    7.90
  -9  16  -3   35.80    5.40
   9  16   3   37.20    6.30
   9  16   3   28.60    4.60
  10  16   3   71.09    7.20
 -10  16  -3   64.39    6.50
  10  16   3   59.59    6.70
  11  16   3   15.20    3.80
 -11  16  -3   19.20    3.50
 -12  16  -3    1.90    2.20
  12  16   3    3.50    2.70
 -13  16  -3   23.70    3.60
  13  16   3   17.50    3.40
  14  16   3   48.40    4.80
 -14  16  -3   50.89    4.60
  15  16   3    1.30    1.80
  14  17  -3    1.40    2.10
 -14  17   3   -0.40    1.50
 -13  17   3   51.29    4.70
  13  17  -3   57.49    5.30
 -12  17   3    6.00    2.30
  12  17  -3    7.30    3.00
 -12  17   3    5.10    3.00
 -11  17   3    4.70    2.90
  11  17  -3    3.80    2.90
 -11  17   3    0.00    2.00
 -10  17   3   14.10    3.70
  10  17  -3   12.40    3.40
  -9  17   3   21.50    4.10
   9  17  -3   26.50    4.30
  -9  17   3   19.00    3.40
   9  17  -3   11.80    3.60
  -8 -17   3   -6.10   10.20
   8  17  -3    2.40    3.30
   8  17  -3   -1.80    2.60
  -8  17   3   -2.20    3.00
  -8  17   3    1.50    2.20
  -7 -17   3   19.40    9.70
  -7  17   3   33.50    5.70
  -7  17   3   35.40    4.90
   7  17  -3   34.80    5.50
   7  17  -3   32.30    5.30
  -6 -17   3   11.80    8.50
  -6 -17   3   13.70   11.20
   6  17  -3   18.50    4.00
  -6  17   3   19.50    3.40
  -6  17   3   20.50    3.80
  -6  17   3   17.80    4.10
   6  17  -3   22.40    4.40
  -5 -17   3  136.19   15.50
   5  17  -3  155.88   10.60
  -5  17   3  144.59    9.60
   5  17  -3  138.69    9.90
  -5  17   3  132.59    8.70
  -5  17   3  140.59    9.80
  -4 -17   3   13.10    7.70
   4  17  -3    8.60    3.60
  -4  17   3    9.20    2.80
   4  17  -3    8.40    3.90
  -4  17   3   12.10    3.10
  -4  17   3   10.00    3.60
  -3 -17   3  259.87   17.90
  -3  17   3  235.18   13.00
   3  17  -3  220.28   13.90
   3  17  -3  241.68   11.90
   3  17  -3  249.38   12.30
   3  17  -3  259.97   15.20
  -3  17   3  204.38   14.00
  -2 -17   3    5.10    5.70
  -2  17   3    8.00    6.50
  -2  17   3   15.80    4.90
   2  17  -3    9.30    4.00
   2  17  -3   12.90    5.50
   1 -17  -3  146.99   12.80
  -1 -17   3  143.99   13.10
   1  17  -3  123.29   10.70
   0 -17   3   77.89   10.90
   0 -17  -3   79.59    9.40
   0  17  -3   84.39   10.30
   1 -17   3  138.79   12.40
  -1 -17  -3  144.19   13.20
  -1  17  -3  141.89   13.30
  -2 -17  -3    6.60    6.50
   2 -17   3    6.90    6.00
  -2  17  -3   13.90    6.90
  -3 -17  -3  243.78   17.70
   3 -17   3  236.38   17.90
   3  17   3  256.17   14.40
  -4 -17  -3   21.60    8.30
   4 -17   3    2.30    6.50
   4  17   3   10.30    3.90
  -4  17  -3    9.30    3.00
   4  17   3   15.30    3.90
  -5 -17  -3  125.39   15.10
  -5 -17  -3  120.59   18.60
   5 -17   3  166.98   15.60
   5  17   3  156.38   10.20
  -5  17  -3  117.79   10.40
   5  17   3  148.89   10.10
  -5  17  -3  143.99    9.20
  -6 -17  -3   12.20    9.60
   6 -17   3   15.20    9.00
   6  17   3   16.00    4.30
   6  17   3   20.10    4.30
  -6  17  -3   16.20    4.40
  -6  17  -3   17.20    3.70
  -7 -17  -3   39.90   11.60
   7 -17   3   25.20   10.00
   7  17   3   43.30    6.70
  -7  17  -3   47.30    7.40
  -7  17  -3   33.40    5.20
   7  17   3   28.50    4.70
  -8 -17  -3   17.00   12.80
   8 -17   3    4.00   11.20
   8  17   3   -1.40    2.80
   8  17   3   -2.70    3.40
  -8  17  -3    2.30    2.50
  -9  17  -3   36.10    5.20
   9  17   3   29.30    4.90
   9  17   3   31.30    5.50
  10  17   3   11.30    3.60
 -10  17  -3   17.30    3.30
  10  17   3   16.00    3.90
 -11  17  -3    3.30    2.30
  11  17   3    7.60    3.00
  12  17   3    6.20    2.70
 -12  17  -3   11.90    2.80
 -13  17  -3   49.00    4.80
  13  17   3   44.60    5.10
  14  17   3    2.90    1.90
 -14  17  -3    3.40    1.70
 -14  18   3    1.60    1.40
  14  18  -3    2.80    1.90
 -13  18   3   44.80    4.10
  13  18  -3   36.20    4.60
 -12  18   3    1.40    1.90
  12  18  -3    1.90    2.40
 -12  18   3    1.80    3.30
  11  18  -3    0.90    2.50
 -11  18   3   -1.20    2.00
 -11  18   3    4.00    3.00
  10  18  -3   21.00    3.80
 -10  18   3   22.10    3.90
 -10  18   3   31.90    4.40
   9  18  -3    6.20    3.10
  -9  18   3    4.10    2.40
   9  18  -3    4.30    2.90
  -9  18   3   -0.40    2.80
  -8  18   3    9.40    2.70
   8  18  -3    4.80    3.00
  -8  18   3    5.80    3.30
   8  18  -3    5.70    3.10
  -7 -18   3    6.30   10.40
  -7  18   3    7.90    3.20
  -7  18   3    3.60    2.50
   7  18  -3    4.60    3.30
   7  18  -3    4.40    3.20
  -6 -18   3   18.90   13.00
  -6 -18   3    8.00    9.10
   6  18  -3    7.60    3.20
  -6  18   3    9.40    3.20
   6  18  -3    9.20    3.50
  -6  18   3    5.50    3.10
  -6  18   3   11.30    2.70
  -5 -18   3   66.89   12.00
  -5  18   3   63.19    6.80
   5  18  -3   60.29    6.70
   5  18  -3   61.59    6.50
  -5  18   3   60.09    5.90
  -5  18   3   49.70    5.40
  -4 -18   3   14.10    9.40
   4  18  -3   14.90    4.20
   4  18  -3   16.80    3.90
  -4  18   3   11.80    3.70
  -4  18   3   13.40    3.30
  -4  18   3   18.20    3.10
  -3 -18   3   61.69   10.50
   3  18  -3   52.59    6.10
   3  18  -3   44.20    6.30
  -3  18   3   50.39    5.50
  -3  18   3   48.20    6.30
  -3  18   3   53.39    5.50
   2 -18  -3    9.10    6.70
  -2 -18   3    8.10    7.50
  -2  18   3   -0.30    4.90
  -2  18   3    3.80    3.30
  -2  18   3    0.60    3.80
   2  18  -3    1.30    3.00
   2  18  -3    3.80    3.60
  -2  18   3   -0.80    2.80
   2  18  -3   -0.20    3.40
   2  18  -3    5.70    3.10
  -1 -18   3  324.97   21.50
   1 -18  -3  366.76   21.70
   1  18  -3  366.26   18.80
   1  18  -3  336.27   18.60
  -1  18   3  362.36   17.80
  -1  18   3  349.07   18.50
   1  18  -3  325.17   18.00
   0 -18  -3  112.79   12.80
   0 -18   3  102.69   13.30
   0  18  -3  115.89    9.30
   0  18   3  109.79    8.80
   0  18  -3  117.59   11.50
   0  18   3  114.49    8.20
   1 -18   3  405.36   23.40
  -1 -18  -3  332.27   21.40
   1  18   3  337.57   18.60
  -1  18  -3  359.86   18.30
   1  18   3  346.27   17.90
  -1  18  -3  359.56   21.60
  -1  18  -3  336.47   18.70
   2 -18   3   -7.00    6.10
  -2 -18  -3    3.30    7.00
  -2  18  -3    9.70    3.80
   2  18   3   -2.90    3.20
   2  18   3   -4.00    3.70
  -2  18  -3    2.40    2.80
  -2  18  -3   -4.50    6.90
   2  18   3    4.60    3.60
  -3 -18  -3   45.90    9.40
   3 -18   3   27.50    8.20
  -3  18  -3   46.70    5.50
   3  18   3   51.29    6.60
  -3  18  -3   50.59   10.10
   3  18   3   38.70    6.50
  -3  18  -3   56.29    6.80
   3  18   3   42.70    6.40
  -4 -18  -3   21.00   10.60
   4 -18   3   18.90    8.90
   4  18   3   14.90    3.80
  -4  18  -3   19.50    4.60
  -4  18  -3   16.30    3.30
   4  18   3   24.30    7.10
   4  18   3   10.70    3.80
  -5 -18  -3   38.40   11.00
   5 -18   3   54.49   10.80
  -5  18  -3   52.39    5.60
  -5  18  -3   69.59    7.60
   5  18   3   60.29    7.00
   5  18   3   62.39    6.90
   6 -18   3    8.50    9.70
  -6 -18  -3    3.50   10.80
  -6  18  -3   11.60    3.00
  -6  18  -3    4.90    4.20
   6  18   3    8.20    3.60
   6  18   3    1.70    3.20
  -7 -18  -3    1.90   11.90
   7 -18   3   19.50   11.50
  -7  18  -3    7.90    3.00
  -7  18  -3    4.50    4.30
   7  18   3    2.70    3.50
   7  18   3    7.60    3.40
   8  18   3   12.90    3.60
  -8  18  -3   13.80    3.40
   8  18   3   10.90    3.80
  -9  18  -3   -2.00    2.20
   9  18   3    0.10    3.00
   9  18   3   -0.10    2.80
  10  18   3   16.00    3.70
  10  18   3   23.70    4.20
 -10  18  -3   26.30    4.60
 -11  18  -3    0.20    2.10
  11  18   3    3.00    2.50
  12  18   3    4.00    2.30
 -12  18  -3    3.00    2.10
 -13  18  -3   42.20    4.20
  13  18   3   36.60    4.60
  14  18   3   -0.90    1.70
 -14  18  -3   -0.50    1.50
 -13  19   3   20.00    2.80
  13  19  -3   22.00    3.60
  12  19  -3    7.80    2.50
 -12  19   3   12.80    2.40
 -11  19   3    3.00    2.90
 -11  19   3    4.20    2.00
  11  19  -3    7.90    2.80
 -10  19   3   37.90    5.20
  10  19  -3   35.00    5.30
 -10  19   3   33.90    4.30
  -9  19   3   28.20    4.30
   9  19  -3   34.20    5.40
  -9  19   3   33.00    5.10
   9  19  -3   26.60    4.50
  -8  19   3   43.60    5.00
  -8  19   3   38.80    5.80
   8  19  -3   58.49    6.30
   8  19  -3   43.60    6.30
   7  19  -3   39.30    5.60
   7  19  -3   29.30    4.90
  -7  19   3   25.60    4.40
  -7  19   3   34.30    5.60
  -6 -19   3   47.10   18.20
  -6 -19   3   62.09   12.90
   6  19  -3   57.29    6.50
  -6  19   3   60.39    6.70
   6  19  -3   66.09    7.10
  -6  19   3   60.49    5.60
  -5 -19   3  179.28   22.20
   5 -19  -3  194.78   17.70
  -5  19   3  192.08   11.00
  -5  19   3  201.78   11.90
  -5  19   3  203.48   12.40
   5  19  -3  207.88   12.30
   5  19  -3  197.98   12.60
  -4 -19   3  283.67   23.30
   4 -19  -3  319.57   22.00
   4  19  -3  308.47   17.50
  -4  19   3  315.57   17.10
   4  19  -3  322.67   17.00
  -4  19   3  327.07   16.50
  -4  19   3  291.17   15.30
   3 -19  -3   92.49   12.90
  -3 -19   3   72.49   12.20
   3  19  -3   94.09    7.80
  -3  19   3   94.59   10.30
   3  19  -3   86.79    8.10
  -3  19   3   94.79    7.40
  -3  19   3   89.89    8.00
  -3  19   3   70.79    9.90
  -3  19   3   92.49    6.80
  -2 -19   3   32.50   10.10
   2 -19  -3   17.70    8.70
   2  19  -3   44.90    6.30
   2  19  -3   41.30    5.90
  -2  19   3   42.30    6.30
  -2  19   3   42.00    5.50
   1 -19  -3   -1.90    7.00
  -1 -19   3   10.90    7.70
   1  19  -3    9.50    3.50
   1  19  -3   12.90    3.50
  -1  19   3   10.30    3.90
  -1  19   3    5.50    3.00
   1  19  -3    9.30    3.80
   1  19  -3   14.70    4.60
   0 -19   3 2621.74  113.89
   0 -19  -3 2469.75  112.79
   0  19  -3 2314.17  107.09
   0  19  -3 2453.05  108.49
   0  19   3 2599.84  108.49
   0  19   3 2491.35  109.19
   0  19  -3 2661.33  109.39
   0  19  -3 2374.16  109.09
   1 -19   3    3.90    8.00
  -1 -19  -3   -0.40    8.20
   1  19   3    9.80    3.70
   1  19   3    7.10    3.20
  -1  19  -3    8.90    2.80
  -1  19  -3    6.00    4.00
  -1  19  -3    6.90    3.70
  -1  19  -3   12.50    6.70
   1  19   3    1.80    4.00
  -2 -19  -3   32.70   10.10
   2 -19   3   31.00    8.60
  -2  19  -3   45.10    6.40
   2  19   3   30.00    4.30
   2  19   3   37.40    5.40
  -2  19  -3   36.10    5.10
  -2  19  -3   44.60    6.30
  -2  19  -3   24.10    8.40
   2  19   3   42.00    6.30
   3 -19   3  102.09   13.40
  -3 -19  -3   71.99   13.10
   3  19   3   87.09    7.50
  -3  19  -3   89.89    7.10
  -3  19  -3  109.09   15.30
  -3  19  -3   87.59    8.20
   3  19   3   93.79    8.30
   3  19   3   91.99    8.00
  -4 -19  -3  340.47   25.90
  -4 -19  -3  289.47   22.50
  -4  19  -3  288.57   15.30
   4  19   3  297.47   16.80
  -4  19  -3  300.97   23.70
   4  19   3  292.57   16.20
   4  19   3  290.37   15.70
  -4  19  -3  280.07   16.30
  -5 -19  -3  156.98   19.70
   5  19   3  183.78   11.80
  -5  19  -3  192.38   11.00
  -5  19  -3  171.78   11.90
   5  19   3  201.18   12.50
   6 -19   3   55.79   12.60
  -6 -19  -3   65.99   15.30
   6  19   3   71.29    7.00
   6  19   3   65.79    7.40
  -6  19  -3   64.69    6.20
  -6  19  -3   61.49    7.50
   7  19   3   22.10    4.50
  -7  19  -3   21.10    4.70
   7  19   3   37.10    6.00
  -7  19  -3   27.70    4.80
   8  19   3   45.60    6.40
   8  19   3   39.10    6.40
  -8  19  -3   53.99    5.70
   9  19   3   32.20    5.50
   9  19   3   37.00    5.90
  -9  19  -3   35.90    5.10
  10  19   3   35.80    5.50
 -10  19  -3   35.40    4.90
  10  19   3   33.80    5.30
  11  19   3    5.10    2.60
 -11  19  -3    6.60    2.30
  12  19   3   14.10    2.90
 -12  19  -3    9.10    2.40
 -13  19  -3   12.60    2.20
  13  20  -3    2.10    1.70
 -13  20   3    0.80    1.40
  12  20  -3    4.50    2.10
 -12  20   3    4.70    1.70
 -11  20   3    3.70    2.00
  11  20  -3    8.60    2.60
 -11  20   3    9.50    2.90
  10  20  -3   -0.10    2.30
 -10  20   3    3.50    2.70
 -10  20   3   -0.70    1.80
  -9  20   3    1.10    1.90
   9  20  -3    4.00    2.80
   9  20  -3   -2.50    2.20
  -9  20   3    3.10    2.60
   8  20  -3    9.50    3.30
   8  20  -3    5.90    2.90
  -8  20   3    7.20    3.00
  -8  20   3    5.60    2.30
  -7  20   3   38.30    4.70
   7  20  -3   52.49    6.10
  -7  20   3   48.00    6.00
   7  20  -3   50.69    6.30
  -6  20   3   12.70    3.40
   6  20  -3   17.60    3.80
   6  20  -3    8.60    3.40
  -6  20   3   16.90    2.90
  -5 -20   3   30.90   22.00
   5  20  -3   49.10    6.30
  -5  20   3   53.89    6.30
  -5  20   3   48.70    5.00
  -5  20   3   57.09    5.70
   5  20  -3   41.40    6.60
   4 -20  -3   14.80    9.80
  -4 -20   3   34.60   12.80
   4  20  -3   15.10    3.70
  -4  20   3   27.60    4.40
   4  20  -3   17.80    4.10
  -4  20   3   25.60    4.10
  -4  20   3   24.90    7.40
  -4  20   3   -2.30   10.90
  -4  20   3   30.80    5.30
  -3 -20   3   38.50   12.50
   3 -20  -3   67.39   11.80
  -3  20   3   69.09    6.50
   3  20  -3   62.39    6.80
  -3  20   3   67.89    7.00
   3  20  -3   64.59    7.20
   2 -20  -3   26.00    9.80
  -2 -20   3   13.30   10.00
   2  20  -3   14.40    4.00
  -2  20   3   22.10    4.50
   2  20  -3   19.10    3.90
  -2  20   3   31.50    4.80
   1 -20  -3   50.09   10.90
  -1 -20   3   48.90   10.60
  -1  20   3   67.49    7.00
   1  20  -3   56.79    6.30
   1  20  -3   62.89    7.20
  -1  20   3   56.99    6.10
   0 -20   3   85.69   13.10
   0 -20  -3   67.49   11.60
   0  20  -3   80.59    7.30
   0  20  -3   68.99    7.20
   0  20   3   83.19    6.70
   0  20  -3   64.69    9.00
   0  20   3   76.69    7.40
   0  20  -3   61.69    5.90
   0  20  -3   67.59    7.40
   1 -20   3   62.89   12.30
  -1 -20  -3   47.70   11.10
   1  20   3   60.59    6.00
  -1  20  -3   58.49    6.80
  -1  20  -3   50.09    5.40
  -1  20  -3   39.50    6.40
  -1  20  -3   72.39   10.90
   1  20   3   58.29    7.20
   1  20   3   62.59    7.10
   2 -20   3   16.20   10.10
  -2 -20  -3   29.40   11.10
  -2  20  -3   30.70    8.60
  -2  20  -3   25.90    4.70
  -2  20  -3   20.80    4.50
  -2  20  -3   23.60    3.50
   2  20   3   17.10    3.60
   2  20   3   14.20    4.10
   2  20   3   19.80    4.00
   3 -20   3   83.69   13.40
  -3 -20  -3   71.39   14.20
   3  20   3   68.19    7.10
  -3  20  -3   74.29    6.20
  -3  20  -3   62.09    7.50
   3  20   3   59.99    7.30
   3  20   3   72.89    6.80
  -3  20  -3   75.39   12.00
  -4 -20  -3   26.30   12.90
   4 -20   3   36.10   11.40
   4  20   3   36.10    5.60
   4  20   3   29.30    5.00
  -4  20  -3   32.70    5.00
  -4  20  -3   29.40   10.60
  -5 -20  -3   65.39   22.00
   5  20   3   49.60    6.50
  -5  20  -3   41.80   13.10
  -5  20  -3   42.10    5.80
  -5  20  -3   52.99    5.60
   5  20   3   59.19    6.90
   6  20   3   20.50    4.10
   6  20   3   22.30    4.50
  -6  20  -3   27.40    4.50
   7  20   3   41.00    6.10
  -7  20  -3   43.10    5.20
  -7  20  -3   35.40    5.10
   7  20   3   44.30    6.50
   8  20   3    5.60    3.20
   8  20   3   10.60    3.40
  -8  20  -3    4.90    2.60
  -9  20  -3   -0.90    2.10
   9  20   3    1.10    2.70
   9  20   3    2.20    2.80
 -10  20  -3   -2.10    2.00
  10  20   3   -0.20    2.50
  11  20   3   14.20    3.00
 -11  20  -3    2.50    2.10
 -12  20  -3    5.90    1.90
  12  20   3    3.30    2.10
 -13  20  -3    0.50    1.40
  13  20   3    1.30    1.70
  12  21  -3    2.40    1.80
 -12  21   3    2.80    1.40
  11  21  -3    2.20    2.00
 -11  21   3   -1.50    1.50
  10  21  -3   34.10    4.50
 -10  21   3   34.40    4.80
 -10  21   3   33.70    3.60
   9  21  -3   34.70    4.90
  -9  21   3   26.70    4.70
   9  21  -3   29.90    4.80
  -9  21   3   32.30    3.80
   8  21  -3   19.50    3.80
  -8  21   3   25.70    4.10
  -8  21   3   24.80    3.80
   8  21  -3   17.80    3.80
   7  21  -3   64.09    7.30
  -7  21   3   79.69    7.20
  -7  21   3   82.89    5.90
   7  21  -3   78.99    7.30
   6  21  -3   64.59    6.80
  -6  21   3   56.09   11.60
  -6  21   3   66.19    5.20
  -6  21   3   56.69    6.60
   6  21  -3   62.99    7.10
  -5  21   3    4.20    2.30
   5  21  -3    6.10    3.30
  -5  21   3    7.40    3.20
   5  21  -3    6.90    3.20
  -5  21   3   -2.00    7.20
  -4  21   3   48.80    6.60
  -4  21   3   54.19    5.60
   4  21  -3   58.59    7.00
  -4  21   3   38.00    4.70
   4  21  -3   53.89    6.10
  -3 -21   3  133.99   30.20
   3  21  -3  200.38   12.70
  -3  21   3  192.78   12.30
  -3  21   3  177.78   11.30
   3  21  -3  206.78   12.10
   2 -21  -3   34.20   11.80
  -2 -21   3   55.89   13.40
  -2  21   3   69.59    6.10
  -2  21   3   72.99    7.30
   2  21  -3   71.49    7.30
   2  21  -3   65.39    6.90
  -1 -21   3   72.29   13.30
   1 -21  -3  133.49   17.70
  -1  21   3  102.39    8.50
  -1  21   3   99.89    7.70
   1  21  -3   98.29    8.00
   1  21  -3   93.09    8.60
   0 -21   3   24.40   11.20
   0 -21  -3    0.00    9.80
   0  21   3    7.60    3.70
   0  21  -3    7.40    3.10
   0  21  -3    1.90    3.20
   0  21   3    8.10    2.90
   1 -21   3   73.09   13.40
  -1 -21  -3   69.99   13.80
   1  21   3  100.29    7.60
   1  21   3  101.09    8.60
   1  21   3  109.19    8.50
  -1  21  -3  103.59    8.10
  -1  21  -3  103.29    6.80
  -1  21  -3   87.09    8.30
   2 -21   3   81.99   14.40
  -2 -21  -3   80.69   15.20
  -2  21  -3   63.89    7.20
  -2  21  -3   69.09    5.90
   2  21   3   77.59    6.40
  -2  21  -3   75.69    7.50
  -2  21  -3   70.29   12.60
   2  21   3   57.99    7.20
   2  21   3   76.29    7.40
  -3 -21  -3  144.89   27.00
   3  21   3  180.78   12.10
   3  21   3  186.68   10.80
   3  21   3  176.98   11.40
  -3  21  -3  172.78   11.70
  -3  21  -3  174.48   18.30
  -3  21  -3  178.58   10.10
  -4  21  -3   60.09    7.10
   4  21   3   60.79    7.20
  -4  21  -3   56.89   12.20
  -4  21  -3   50.59    5.50
   4  21   3   59.69    6.70
  -5  21  -3    2.80    2.30
  -5  21  -3    9.40    3.70
   5  21   3    5.80    3.20
   5  21   3    0.30    2.90
  -5  21  -3   -4.80   11.80
  -6  21  -3   59.39    5.50
  -6  21  -3   57.99   15.70
   6  21   3   57.59    6.80
  -6  21  -3   40.30    7.00
   6  21   3   59.49    7.00
  -7  21  -3   91.29    7.00
   7  21   3   99.79    8.30
   7  21   3   91.29    8.00
  -8  21  -3   31.70    4.50
   8  21   3   32.40    5.60
   8  21   3   37.50    5.30
  -9  21  -3   29.60    4.20
   9  21   3   27.70    4.70
   9  21   3   30.80    5.20
  10  21   3   35.90    4.80
 -10  21  -3   36.20    4.30
 -11  21  -3    1.10    1.60
  11  21   3   -2.70    1.70
 -12  21  -3    5.30    1.80
  12  21   3    1.10    1.80
  11  22  -3   19.70    2.90
 -11  22   3   16.00    2.50
 -10  22   3   32.90    3.20
  10  22  -3   24.50    4.10
 -10  22   3   26.90    3.70
  -9  22   3   14.00    3.00
   9  22  -3    7.10    2.60
  -9  22   3   13.90    2.20
   8  22  -3   54.19    5.50
  -8  22   3   49.40    5.50
  -8  22   3   39.70    4.10
   8  22  -3   48.40    5.50
   7  22  -3   55.99    6.10
   7  22  -3   59.29    6.30
  -7  22   3   60.69    4.80
  -7  22   3   54.99    6.10
  -6  22   3    9.60    3.20
   6  22  -3    3.10    3.00
   6  22  -3    6.70    3.00
  -6  22   3   10.90    2.30
  -5  22   3   39.70    5.60
   5  22  -3   35.50    5.30
   5  22  -3   39.70    5.70
   4  22  -3    5.60    3.00
   4  22  -3    3.50    3.30
  -4  22   3    3.90    3.00
  -3  22   3    8.30    3.40
   3  22  -3   15.60    3.90
   3  22  -3    7.90    3.20
  -3  22   3    5.40    2.90
  -2  22   3  178.48   11.70
   2  22  -3  171.58   11.10
  -2  22   3  186.18   10.90
   2  22  -3  166.58   11.50
  -1  22   3   60.19    5.60
   1  22  -3   48.30    6.10
  -1  22   3   61.29    7.10
   1  22  -3   58.79    7.00
   0  22  -3   58.39    6.30
   0  22  -3   57.69    7.00
   0  22   3   55.09    6.60
   0  22   3   59.89    5.70
  -1  22  -3   60.29    7.00
   1  22   3   51.39    6.70
   1  22   3   52.59    6.70
  -1  22  -3   58.19    6.70
   1  22   3   55.79    5.80
   2  22   3  165.58   10.50
   2  22   3  179.18   11.20
  -2  22  -3  172.68    9.60
   2  22   3  183.48   12.00
  -2  22  -3  188.28   11.80
   3  22   3   10.10    3.20
   3  22   3    2.70    3.30
  -3  22  -3    3.30    8.30
  -3  22  -3    7.00    2.40
  -3  22  -3    3.50    3.20
   3  22   3    4.40    3.00
   4  22   3    2.70    3.00
  -4  22  -3    4.00    2.30
   4  22   3   -4.30    5.10
   4  22   3    4.20    3.10
  -4  22  -3    1.30    3.10
  -4  22  -3    3.60   10.70
  -5  22  -3   34.40    5.80
  -5  22  -3   53.09   21.90
   5  22   3   31.50    5.20
  -5  22  -3   32.30    4.40
   5  22   3   44.20    5.80
  -6  22  -3    8.70    3.40
  -6  22  -3    9.80    2.50
   6  22   3    5.60    3.00
   6  22   3    8.80    3.30
  -7  22  -3   43.30    6.60
   7  22   3   55.29    6.30
  -7  22  -3   55.29    5.00
   7  22   3   64.69    6.70
   8  22   3   39.20    5.50
  -8  22  -3   46.40    4.60
   8  22   3   48.40    5.80
  -9  22  -3   14.30    2.50
   9  22   3   12.20    2.80
   9  22   3   12.90    3.30
  10  22   3   32.00    4.60
 -10  22  -3   38.60    3.80
 -11  22  -3   15.40    2.70
  11  22   3   20.80    3.50
  11  23  -3   29.40    3.20
 -10  23   3    3.40    3.30
  10  23  -3   14.50    2.70
  -9  23   3   10.10    2.70
   9  23  -3    5.50    2.30
  -9  23   3    4.50    1.60
   8  23  -3   43.90    5.00
  -8  23   3   35.70    3.30
   8  23  -3   41.10    4.90
  -8  23   3   27.30    4.50
   7  23  -3    4.10    2.50
  -7  23   3   -2.50    1.60
   7  23  -3    1.30    2.40
  -7  23   3    4.10    2.60
  -6  23   3   -2.60    2.40
   6  23  -3    0.80    2.50
   6  23  -3    2.30    2.40
   5  23  -3    7.10    3.30
   5  23  -3    5.20    2.80
  -5  23   3    8.20    2.90
   4  23  -3    5.50    3.30
  -4  23   3    1.40    2.60
   4  23  -3    1.00    2.60
  -3  23   3   19.70    3.90
   3  23  -3   19.10    4.20
   3  23  -3   16.60    3.70
  -2  23   3   65.69    6.20
   2  23  -3   77.69    7.60
  -2  23   3   79.19    7.40
   2  23  -3   70.89    6.90
   1  23  -3   23.10    4.20
  -1  23   3   14.80    3.70
   1  23  -3   32.10    5.10
  -1  23   3   24.80    3.90
   0  23  -3    3.00    2.80
   0  23   3   -1.20    2.50
   0  23   3    3.20    2.80
   0  23  -3    2.40    3.00
  -1  23  -3   27.90    4.70
  -1  23  -3   39.30    5.90
   1  23   3   33.30    4.80
   1  23   3   38.00    5.70
   2  23   3   75.09    7.50
   2  23   3   61.99    6.90
   2  23   3   56.89    5.90
  -2  23  -3   80.89    7.30
   3  23   3   16.10    3.50
  -3  23  -3   12.10    3.60
   3  23   3    9.70    3.40
   3  23   3    7.90    3.50
  -3  23  -3   16.80    2.60
   4  23   3    3.70    2.90
   4  23   3   -1.10    2.70
  -4  23  -3    2.00    2.80
  -4  23  -3    2.60    2.10
   5  23   3   -2.30    2.90
  -5  23  -3    6.10    3.10
   5  23   3   12.10    3.30
  -5  23  -3    4.90    2.10
  -6  23  -3   -3.70    1.80
   6  23   3    1.30    2.50
  -6  23  -3   -7.20    3.00
   6  23   3    0.90    2.60
   7  23   3    3.90    2.70
   7  23   3    2.80    2.50
  -7  23  -3   -6.10    4.80
  -7  23  -3    0.80    1.80
  -8  23  -3   42.40    4.10
   8  23   3   43.30    5.20
   8  23   3   33.50    5.00
  -9  23  -3   10.50    2.10
   9  23   3    7.30    2.50
 -10  23  -3    9.90    1.90
  10  23   3   12.00    2.50
  11  23   3   36.30    4.20
  10  24  -3    2.10    1.70
  -9  24   3    3.70    2.50
   9  24  -3    1.10    1.80
   8  24  -3    2.70    2.10
   8  24  -3    3.00    2.10
  -8  24   3    9.30    2.60
  -7  24   3   17.40    3.30
   7  24  -3   24.40    3.80
   7  24  -3   23.50    4.10
   6  24  -3   10.30    2.80
  -6  24   3   11.20    3.00
   5  24  -3   42.90    5.30
  -5  24   3   35.20    5.30
   5  24  -3   43.30    5.60
  -4  24   3   40.80    5.40
   4  24  -3   29.40    4.80
   4  24  -3   34.30    5.40
   3  24  -3   60.39    6.50
  -3  24   3   44.60    6.10
   3  24  -3   56.69    6.20
  -2  24   3    2.50    2.60
   2  24  -3    3.60    2.80
   2  24  -3    4.20    3.00
   1  24  -3    6.80    3.20
  -1  24   3    8.30    3.10
   1  24  -3    5.70    2.80
   0  24  -3    3.20    2.90
   0  24   3    5.00    2.80
   1  24   3    9.00    3.10
   1  24   3    2.00    3.40
  -1  24  -3    5.30    3.10
  -1  24  -3   -1.60    2.70
  -2  24  -3    6.50    3.20
   2  24   3    6.90    3.00
   2  24   3    5.20    3.40
   3  24   3   49.99    6.00
   3  24   3   50.39    6.10
  -3  24  -3   46.50    6.10
   4  24   3   44.40    5.80
  -4  24  -3   32.00    5.40
   4  24   3   35.40    5.40
  -5  24  -3   32.00    5.30
  -5  24  -3   38.50    3.80
   5  24   3   33.80    5.80
   5  24   3   50.19    5.60
   6  24   3    9.40    3.20
  -6  24  -3   12.70    3.30
  -6  24  -3    9.40    1.90
  -7  24  -3   17.80    2.30
   7  24   3   19.00    3.20
   7  24   3   21.10    3.50
   8  24   3    3.00    2.20
   8  24   3    6.40    2.60
  -8  24  -3    1.60    1.50
  -9  24  -3    3.60    1.40
   9  24   3    5.10    2.30
  10  24   3    0.90    1.70
 -10  24  -3    1.00    1.40
   9  25  -3   -0.90    1.50
  -8  25   3    7.40    2.30
   8  25  -3   12.30    2.40
  -7  25   3    7.10    2.40
   7  25  -3    8.40    2.50
   7  25  -3    3.90    2.00
   6  25  -3    7.00    2.60
  -6  25   3    6.60    2.30
   6  25  -3    5.90    2.60
   5  25  -3    3.00    2.30
   5  25  -3    0.70    2.10
  -5  25   3    5.70    2.40
  -4  25   3    4.90    2.50
   4  25  -3    8.10    2.80
   4  25  -3    9.50    2.90
   3  25  -3    6.10    3.00
  -3  25   3    7.40    2.80
   3  25  -3    1.40    2.60
   2  25  -3   53.19    5.70
   2  25  -3   58.39    6.30
  -2  25   3   53.79    6.00
   1  25  -3   -0.50    2.50
   1  25  -3   -2.30    2.70
  -1  25   3    3.00    2.70
   0  25  -3    2.20    2.70
   0  25   3    2.00    2.40
   0  25  -3    0.20    2.90
  -1  25  -3   -3.50    2.90
   1  25   3    2.00    2.50
  -1  25  -3    1.80    2.60
   2  25   3   62.79    6.30
  -2  25  -3   47.50    6.00
  -3  25  -3    5.70    2.80
   3  25   3    5.90    3.00
   3  25   3    0.70    2.70
  -4  25  -3    7.40    2.80
   4  25   3    5.90    2.90
   4  25   3    7.50    2.80
   5  25   3    5.50    2.80
   5  25   3    8.80    2.80
  -5  25  -3    5.10    2.80
   6  25   3   12.60    3.00
  -6  25  -3    7.70    3.10
   6  25   3   10.90    2.80
   7  25   3    8.10    2.50
   7  25   3    9.10    2.60
   8  25   3   12.40    2.60
   8  25   3    9.60    2.30
   9  25   3    0.20    1.80
  -8  26   3    9.40    3.40
   8  26  -3   10.30    2.20
   7  26  -3    8.30    2.30
   7  26  -3    2.80    1.90
  -7  26   3    7.60    2.10
   6  26  -3    5.10    2.20
  -6  26   3    8.90    2.20
   6  26  -3    6.80    2.10
   5  26  -3    4.80    2.40
   5  26  -3   13.90    2.80
  -5  26   3    9.10    2.50
   4  26  -3   45.60    5.00
  -4  26   3   52.19    4.90
   4  26  -3   45.60    5.00
   3  26  -3   11.00    2.80
  -3  26   3   10.60    2.70
   3  26  -3    9.50    2.90
   2  26  -3    2.80    2.50
  -2  26   3    4.60    2.50
   2  26  -3    3.30    2.50
   1  26  -3    5.20    2.60
  -1  26   3    5.00    2.40
   1  26  -3   -0.50    2.40
   0  26   3    8.40    2.80
   0  26  -3    0.10    2.60
   0  26  -3    5.40    2.70
  -1  26  -3   -0.80    2.30
   1  26   3    0.70    2.30
  -2  26  -3    7.50    2.70
   2  26   3    5.10    2.60
   2  26   3   -2.50    3.70
   3  26   3    8.90    2.90
  -3  26  -3   15.30    3.10
   3  26   3   16.00    3.30
  -4  26  -3   50.99    5.40
   4  26   3   56.09    5.70
   4  26   3   60.69    5.60
   5  26   3   11.90    2.80
   5  26   3   12.90    2.90
  -5  26  -3   10.10    3.10
   6  26   3    3.80    2.30
   6  26   3    7.30    2.40
   7  26   3    6.00    2.30
   7  26   3    2.90    1.90
   8  26   3    2.00    1.90
  -6  27   3    2.40    1.90
   6  27  -3    0.70    1.90
   6  27  -3    0.70    1.60
   5  27  -3    3.70    1.90
  -5  27   3    7.00    2.10
   5  27  -3    9.80    2.40
   4  27  -3   50.89    4.60
   4  27  -3   43.40    4.60
  -4  27   3   40.40    4.40
   3  27  -3   13.50    2.80
  -3  27   3   18.00    3.00
   3  27  -3   21.80    3.60
  -2  27   3   47.90    4.70
   2  27  -3   34.40    4.50
   2  27  -3   44.20    4.60
   1  27  -3   11.30    2.80
   1  27  -3   11.00    2.70
  -1  27   3   15.50    3.10
   0  27   3   61.19    5.50
   0  27  -3   58.49    5.60
   1  27   3   19.90    3.40
  -1  27  -3   16.80    3.10
   2  27   3   45.10    5.10
  -2  27  -3   54.99    5.10
   3  27   3   12.40    2.70
  -3  27  -3   16.30    2.90
   4  27   3   40.20    4.80
  -4  27  -3   37.40    4.50
   4  27   3   38.40    4.40
   5  27   3    8.70    2.70
   5  27   3    8.00    2.20
   6  27   3    2.00    2.10
   6  27   3    4.70    2.00
   4  28  -3    0.10    2.00
  -4  28   3    2.70    1.70
   4  28  -3    1.00    1.60
  -3  28   3   -0.50    1.70
   3  28  -3    0.60    1.70
   3  28  -3    4.20    2.20
   2  28  -3    3.40    2.00
  -2  28   3   -0.30    1.80
   2  28  -3    1.50    2.30
  -1  28   3    8.60    2.30
   1  28  -3   10.20    2.40
   0  28   3    3.00    2.10
   0  28  -3    2.50    2.00
  -1  28  -3    9.70    2.40
   1  28   3   11.00    2.50
   2  28   3    2.70    1.90
  -2  28  -3    2.30    2.00
  -3  28  -3   -1.10    2.10
   3  28   3   -3.70    1.60
   4  28   3    3.00    1.80
  -4  28  -3   -3.10    4.20
   1  29  -3    1.80    1.70
  -1  29   3    5.20    1.80
   0  29  -3    9.20    2.00
   0  29   3   10.70    2.20
  -1  29  -3    3.20    1.80
   1  29   3    1.90    1.70
  17   0  -4   13.80    2.30
  16   0  -4    9.40    2.40
  15   0  -4   30.40    4.50
  14   0  -4  108.79    7.90
  13   0  -4    7.80    2.80
  13   0  -4    2.00    9.90
  12   0  -4    7.20    7.70
  11   0  -4    6.40    6.10
  11   0  -4    4.40    3.10
  10   0  -4    5.70    4.90
   9   0  -4   -1.20    3.30
  -9   0   4    2.10    3.60
  -8   0   4   62.99    6.10
   8   0  -4   61.39    6.20
   8   0  -4   55.79    9.40
   7   0  -4 7797.72  339.27
  -7   0   4 7874.81  336.57
   7   0  -4 8079.69  336.97
   6   0  -4  483.45   22.40
   6   0  -4  458.55   24.50
  -6   0   4  468.45   22.20
   5   0  -4 1344.07   62.39
  -5   0   4 1423.06   60.69
  -5   0   4 1377.26   61.09
   5   0  -4 1418.66   60.79
  -4   0   4  435.56   19.90
   4   0  -4  397.46   21.10
   4   0  -4  424.96   19.70
  -4   0   4  445.86   19.80
  -3   0   4    9.10    1.90
  -3   0   4    9.10    1.90
   3   0  -4   10.10    3.10
   3   0  -4    8.90    1.90
  -2   0   4 5791.12  253.87
  -2   0   4 5720.83  253.57
   2   0  -4 6467.75  254.97
   1   0  -4   84.79    5.70
  -1   0   4   85.59    4.60
   1   0  -4   86.89    4.50
   0   0   4  675.13   29.30
   1   0   4   88.19    4.30
   2   0   4 6231.18  258.57
   2   0   4 5974.00  257.67
   3   0   4   11.50    1.00
   3   0   4    9.70    2.00
   4   0   4  437.46   19.90
   4   0   4  415.46   18.20
   5   0   4 1435.86   62.89
   6   0   4  465.55   22.50
   7   0   4 8166.18  347.87
   8   0   4   66.29    6.90
   9   0   4   -1.00    3.80
  10   0   4    7.20    5.00
  11   0   4    3.40    2.60
  11   0   4    0.90    5.90
  12   0   4   -5.20    8.00
  12   0   4    5.40    2.80
  13   0   4   -0.90   10.30
  17   1  -4    7.10    1.90
  16  -1  -4   17.10    3.00
  16   1  -4   16.20    2.80
  15  -1  -4   56.49    5.60
  15   1  -4   54.69    5.30
  14  -1  -4   36.70    5.00
  14   1  -4   35.00    5.10
 -14   1   4   44.70    7.10
  13  -1  -4   62.89    6.10
  13  -1  -4   68.69   12.80
 -13   1   4   42.90    7.60
  13   1  -4   47.90    5.40
  13   1  -4   18.00   11.30
  12  -1  -4  129.09   14.30
  12  -1  -4  125.89    8.70
  12   1  -4  111.39   14.30
 -12   1   4  124.69   10.00
  12   1  -4  123.79    8.50
  11  -1  -4   29.30    4.90
  11  -1  -4   27.10    6.60
  11   1  -4   35.90    4.90
  11   1  -4   26.80    7.20
  10  -1  -4    8.00    4.60
  10   1  -4   -1.50    4.80
  -9  -1   4   52.39    6.60
   9  -1  -4   66.89    6.90
   9   1  -4   56.39    6.60
   8  -1  -4  413.66   24.20
   8  -1  -4  372.46   20.60
  -8  -1   4  393.06   20.20
   8   1  -4  412.96   24.00
  -8   1   4  421.66   20.30
   8   1  -4  437.46   20.80
  -7  -1   4  615.24   29.40
   7  -1  -4  572.84   29.60
   7  -1  -4  623.24   32.80
  -7   1   4  671.03   29.60
   7   1  -4  657.83   29.80
   7   1  -4  674.23   32.40
  -6  -1   4  831.42   39.70
   6  -1  -4  872.51   39.40
   6  -1  -4  835.82   41.40
  -6  -1   4  895.81   39.20
  -6   1   4  894.31   39.20
   6   1  -4  892.81   39.20
   6   1  -4  874.21   41.20
   5  -1  -4  463.15   20.90
  -5  -1   4  491.45   21.40
   5  -1  -4  411.86   22.60
  -5  -1   4  460.55   20.80
   5   1  -4  415.76   20.60
  -5   1   4  416.16   20.60
   4  -1  -4   46.60    3.70
  -4  -1   4   50.39    4.20
   4  -1  -4   46.00    5.70
  -4  -1   4   46.80    3.70
   4   1  -4   41.20    3.60
  -4   1   4   39.80    3.60
   4   1  -4   35.00    4.90
  -3  -1   4   44.50    3.60
  -3  -1   4   40.10    3.60
   3  -1  -4   47.10    3.50
   3  -1  -4   38.20    5.10
  -3   1   4   56.69    3.80
   3   1  -4   58.89    3.50
   3   1  -4   55.69    5.20
   2  -1  -4 1417.16   63.19
   2  -1  -4 1523.25   64.39
  -2  -1   4 1438.16   63.39
  -2  -1   4 1380.26   63.19
  -2   1   4 1497.75   63.39
   2   1  -4 1510.65   64.39
   2   1  -4 1532.75   63.09
  -2   1   4 1499.65   63.09
   1  -1  -4 3026.80  125.39
  -1  -1   4 2960.00  124.09
   1  -1  -4 2693.33  123.79
  -1   1   4 2948.51  123.39
   1   1  -4 2837.62  123.69
   1   1  -4 3006.90  124.89
  -1   1   4 2943.41  123.99
   0  -1   4  183.18    8.80
   0   1  -4  208.48   10.00
   0   1   4  179.78    8.70
   1  -1   4 3008.10  125.29
   1   1   4 2900.91  125.09
   2  -1   4 1532.25   65.49
  -2  -1  -4 1632.14   64.49
   2  -1   4 1469.25   64.89
   2   1   4 1468.15   64.49
   3  -1   4   60.49    4.10
   3  -1   4   55.19    3.00
   3   1   4   46.10    3.80
   4  -1   4   41.50    3.90
   4   1   4   48.80    3.90
   5  -1   4  431.26   21.40
   5   1   4  472.65   21.40
   6  -1   4  866.01   39.30
   6   1   4  859.41   39.30
   7  -1   4  660.73   30.10
   7   1   4  585.04   29.50
   8  -1   4  396.26   20.70
   8   1   4  384.66   20.40
   9  -1   4   68.99    7.70
   9   1   4   56.19    7.40
  10  -1   4   11.80    5.50
  10   1   4   14.90    5.60
  11  -1   4   15.70    7.40
  11  -1   4   30.30    5.10
  11   1   4   46.50    9.10
  11   1   4   28.80    4.90
  12  -1   4  123.09    8.60
  12  -1   4  122.89   15.50
  12   1   4  106.89   15.20
  12   1   4  130.19    8.60
  12   1   4  108.29   10.70
  13  -1   4   45.90    5.40
  13  -1   4   27.20   11.70
  13   1   4   56.49    5.40
  14   1   4   40.00    4.90
  17   2  -4   13.60    2.20
  16  -2  -4    1.80    2.00
  16   2  -4    1.10    1.90
 -16   2   4    2.30    3.80
  15  -2  -4    9.20    2.80
 -15   2   4    7.30    3.90
  15   2  -4   10.90    2.60
  14  -2  -4    0.30    2.40
 -14   2   4   -3.50    3.60
  14   2  -4    4.90    2.50
  13  -2  -4   69.09    6.40
  13  -2  -4   63.99   12.50
 -13   2   4   59.29    7.80
  13   2  -4   63.89    6.10
  13   2  -4   32.70   12.10
  12  -2  -4  149.99   15.20
  12  -2  -4  147.19    9.60
 -12   2   4  148.49   10.70
  12   2  -4  136.19   15.50
  12   2  -4  150.58    9.50
  11  -2  -4   63.09    6.50
  11  -2  -4   56.89    9.00
  11   2  -4   63.09   10.60
  11   2  -4   62.69    5.90
 -10  -2   4    6.20    5.40
  10  -2  -4    2.10    4.30
  10   2  -4    6.40    4.50
   9  -2  -4  395.36   21.60
  -9  -2   4  402.96   20.60
   9   2  -4  428.56   24.60
   9   2  -4  414.96   21.50
  -8  -2   4  284.57   15.30
   8  -2  -4  281.87   15.90
   8   2  -4  288.77   18.90
   8   2  -4  302.97   15.80
  -7  -2   4   40.10    4.70
  -7  -2   4   44.00    5.20
   7  -2  -4   41.20    7.60
   7  -2  -4   37.40    5.20
   7   2  -4   25.50    4.20
   7   2  -4   26.20    5.60
  -7   2   4   37.60    4.50
  -6  -2   4   14.70    3.10
   6  -2  -4   17.90    3.30
  -6  -2   4   25.70    3.80
   6  -2  -4   17.60    5.60
   6   2  -4   14.00    4.40
   6   2  -4   22.50    3.40
  -6   2   4   22.20    3.50
   5  -2  -4  751.42   37.50
   5  -2  -4  727.53   35.50
  -5  -2   4  773.02   35.50
  -5  -2   4  756.32   35.90
   5   2  -4  827.92   37.30
   5   2  -4  850.41   35.50
  -5   2   4  867.21   35.80
  -4  -2   4  411.16   19.70
   4  -2  -4  438.46   19.80
   4  -2  -4  435.86   21.60
  -4  -2   4  405.06   19.90
  -4   2   4  414.86   19.70
   4   2  -4  411.16   19.40
   4   2  -4  461.15   21.20
   3  -2  -4 1753.22   77.49
   3  -2  -4 1892.61   78.99
  -3  -2   4 1730.73   77.69
  -3  -2   4 1880.01   77.69
   3   2  -4 1781.92   78.59
   3   2  -4 1804.82   77.19
  -3   2   4 1784.52   77.59
  -2  -2   4 1226.98   49.99
   2  -2  -4 1156.38   49.70
   2  -2  -4 1218.58   50.79
  -2   2   4 1113.49   49.80
   2   2  -4 1132.49   49.30
   2   2  -4 1050.89   50.49
  -1  -2   4  590.04   27.10
   1  -2  -4  560.24   26.80
  -1   2   4  656.13   27.00
   1   2  -4  671.33   28.20
   1   2  -4  598.64   26.50
   0  -2   4  985.70   43.50
   0   2   4  995.30   43.70
   0   2  -4 1025.40   44.50
   0   2   4 1028.50   43.30
   1  -2   4  629.84   27.10
  -1  -2  -4  616.84   26.80
   1   2   4  622.64   26.80
  -2  -2  -4 1118.49   47.30
   2  -2   4 1109.79   47.50
   2  -2   4 1065.39   47.10
  -3  -2  -4 1754.52   76.99
   3  -2   4 1771.62   77.19
   3   2   4 1851.91   77.19
   4  -2   4  421.76   19.70
   4   2   4  418.76   19.70
   5  -2   4  875.61   37.70
   5   2   4  788.22   37.20
   6  -2   4   20.80    3.70
   6   2   4   18.70    3.50
   7  -2   4   23.40    4.20
   8  -2   4  303.37   17.30
   8   2   4  318.87   17.20
   9  -2   4  392.96   21.60
   9   2   4  391.66   21.50
  10  -2   4    9.80    5.30
  10   2   4    7.80    5.80
  11  -2   4   50.39    6.00
  11  -2   4   58.79    9.90
  11   2   4   54.39    9.60
  11   2   4   65.09    5.90
  12  -2   4  164.98   16.30
  12  -2   4  136.69    9.60
  12   2   4  158.98   11.50
  12   2   4  139.49    9.30
  12   2   4  137.39   16.60
  13  -2   4   62.79    6.20
  13  -2   4   62.49   13.40
  13   2   4   72.59    6.00
  13   2   4   59.09    8.50
 -17   3   4    7.80    3.70
  16  -3  -4    7.30    2.30
 -16   3   4    5.40    3.60
  16   3  -4    5.90    2.10
  15  -3  -4   54.59    5.60
  15   3  -4   41.00    4.80
 -15   3   4   39.80    6.40
  14  -3  -4   17.10    3.70
  14   3  -4   12.90    2.90
 -14   3   4   12.20    3.80
  13  -3  -4   63.49    6.40
  13  -3  -4   77.89   12.70
 -13   3   4   58.89    7.30
  13   3  -4   55.09   13.90
  13   3  -4   60.69    5.90
  12  -3  -4  146.29   15.40
  12  -3  -4  145.99    9.70
  12   3  -4  136.19   16.40
  12   3  -4  135.69    8.90
 -12   3   4  129.69   10.10
  11  -3  -4   31.20    4.90
  11  -3  -4   42.40    7.90
  11   3  -4   40.30    5.00
  11   3  -4   35.70    7.90
 -10  -3   4  119.19   10.80
  10  -3  -4  118.49   10.50
  10   3  -4  124.89   11.10
   9  -3  -4   80.09    7.80
  -9  -3   4   81.29    7.80
   9   3  -4   79.59   10.40
   9   3  -4   69.79    7.70
   8  -3  -4  247.98   14.40
  -8  -3   4  232.38   13.60
  -8  -3   4  239.68   14.90
   8   3  -4  269.27   17.40
   8   3  -4  271.07   14.30
  -7  -3   4   28.90    4.40
  -7  -3   4   16.90    3.90
   7  -3  -4   14.70    6.70
   7  -3  -4   22.50    4.00
   7   3  -4   22.10    5.60
   7   3  -4   31.20    4.00
  -6  -3   4  442.66   21.00
  -6  -3   4  393.16   21.40
   6  -3  -4  429.06   24.00
   6  -3  -4  415.06   21.10
   6   3  -4  456.55   20.80
   6   3  -4  470.55   23.10
  -6   3   4  456.05   21.00
  -5  -3   4   62.49    5.00
  -5  -3   4   57.69    5.10
   5  -3  -4   59.99    8.20
   5  -3  -4   67.69    5.10
  -5   3   4   62.69    4.80
   5   3  -4   55.89    4.50
   5   3  -4   55.29    6.00
  -4  -3   4  212.38   11.10
   4  -3  -4  217.08   13.00
   4  -3  -4  215.18   10.80
  -4  -3   4  235.38   11.10
   4   3  -4  199.28   11.80
   4   3  -4  195.98   10.20
  -4   3   4  190.38   10.60
   3  -3  -4  896.71   42.40
   3  -3  -4  932.91   41.10
  -3  -3   4  981.90   41.30
   3   3  -4  952.40   40.50
  -3   3   4  943.51   41.20
   3   3  -4  908.61   42.10
   2  -3  -4   36.40    3.10
  -2  -3   4   41.20    3.50
   2   3  -4   49.40    2.80
  -2   3   4   47.60    3.50
   2   3  -4   41.90    4.80
  -1   3   4 9999.00  417.16
   1   3  -4 9708.43  417.66
   0  -3   4   97.29    5.30
   0   3   4   92.49    5.40
   0   3   4  104.19    5.20
   2  -3   4   46.60    3.20
  -2  -3  -4   46.90    3.20
   2  -3   4   47.30    3.40
  -3  -3  -4  950.80   41.50
   3  -3   4  974.00   41.70
  -3  -3  -4  924.71   40.30
   4  -3   4  188.08   10.40
  -4  -3  -4  186.48   10.30
   4   3   4  221.98   10.60
  -5  -3  -4   57.19    5.10
   5  -3   4   61.59    5.20
   5   3   4   64.89    5.00
   6  -3   4  440.76   21.40
   6   3   4  426.56   21.10
   7   3   4   19.10    3.80
   8  -3   4  268.17   15.80
   8   3   4  260.67   15.30
   9  -3   4   75.49    8.30
   9   3   4   86.99    8.30
  10  -3   4  119.99   11.20
  10   3   4  125.09   11.90
  11  -3   4   38.30    8.00
  11  -3   4   34.00    5.40
  11   3   4   30.60    7.90
  11   3   4   36.70    4.90
  12  -3   4  129.79    9.30
  12  -3   4  155.98   16.00
  12   3   4  141.19   10.90
  12   3   4  143.59    9.00
  13  -3   4   58.89    6.00
  13  -3   4   60.79   13.30
  13   3   4   58.29    5.60
  13   3   4   65.49    8.30
  14   3   4   11.30    4.40
 -17   4   4    9.30    3.30
  16  -4  -4   26.50    3.90
  16   4  -4   24.20    3.50
 -16   4   4   15.60    3.60
  15  -4  -4   24.70    4.00
 -15   4   4   21.00    4.10
  14  -4  -4   37.00    5.30
  14   4  -4   32.60    4.60
 -14   4   4   36.00    6.20
  13  -4  -4   98.39   17.90
  13  -4  -4   65.79    6.60
  13   4  -4   50.09   15.00
 -13   4   4   55.19    7.00
  13   4  -4   68.39    6.10
  12  -4  -4   44.10    9.30
  12  -4  -4   37.30    5.90
  12   4  -4   34.40   10.20
  12   4  -4   31.30    4.70
 -12   4   4   29.10    4.80
  11  -4  -4    8.50    3.90
  11  -4  -4   21.90    6.60
  11   4  -4   19.40    7.60
  11   4  -4   18.20    3.40
 -11   4   4   17.50    4.10
 -10  -4   4    0.80    5.90
  10  -4  -4    4.60    4.70
  10   4  -4   11.50    5.40
  -9  -4   4  249.88   14.50
   9  -4  -4  253.37   15.50
   9   4  -4  228.28   17.40
   9   4  -4  266.37   15.10
  -8  -4   4  106.49    9.00
   8  -4  -4  117.99    8.90
  -8  -4   4  117.79    8.50
   8   4  -4   99.59   10.90
   8   4  -4   96.89    8.10
  -7  -4   4  150.98    9.30
   7  -4  -4  139.39    9.50
  -7  -4   4  150.48   10.10
   7   4  -4  146.49    9.20
   7   4  -4  144.09   11.10
   6  -4  -4  363.96   21.10
  -6  -4   4  308.97   16.80
   6  -4  -4  336.67   17.30
  -6  -4   4  333.37   17.70
   6   4  -4  356.76   18.80
   6   4  -4  361.76   16.70
  -5  -4   4  145.29    8.60
   5  -4  -4  133.59    8.40
   5  -4  -4  138.29   11.80
  -5  -4   4  138.79    8.80
   5   4  -4  157.28   10.10
   5   4  -4  152.08    7.90
  -4  -4   4  324.57   16.40
   4  -4  -4  332.27   16.00
  -4  -4   4  324.17   16.00
   4  -4  -4  328.37   18.40
   4   4  -4  333.97   17.10
   4   4  -4  330.57   15.20
  -4   4   4  335.47   16.00
  -3  -4   4  104.29    6.70
   3  -4  -4  103.89    8.90
   3   4  -4  119.99    5.90
   3   4  -4  129.59    7.80
  -3   4   4  119.99    6.70
   2  -4  -4 1318.87   54.79
  -2  -4   4 1357.76   55.19
   2   4  -4 1249.47   53.99
   2   4  -4 1171.78   55.69
  -2   4   4 1229.98   54.79
   1  -4  -4  154.68    8.30
  -1  -4   4  152.38    8.50
   1   4  -4  184.28    9.80
   1   4  -4  170.78    7.60
  -1   4   4  185.88    9.20
   0  -4   4 1702.53   75.19
   0   4   4 1803.82   74.89
   1  -4   4  180.68    8.60
   1  -4   4  181.68    9.00
   2  -4   4 1195.58   54.49
  -2  -4  -4 1269.57   54.49
   2  -4   4 1328.47   54.69
  -3  -4  -4  121.29    6.80
  -3  -4  -4  118.49    5.80
   3  -4   4  127.49    7.00
  -4  -4  -4  299.77   13.80
   4  -4   4  327.67   15.70
  -4  -4  -4  333.37   15.60
   5  -4   4  148.69    8.90
  -5  -4  -4  137.39    8.40
   5   4   4  138.09    8.40
  -6  -4  -4  346.47   17.90
   6  -4   4  348.87   18.00
   6   4   4  357.86   17.70
   7  -4   4  148.99   10.00
   7   4   4  150.58   10.00
   8  -4   4  112.09    9.40
   8   4   4  119.19    8.90
   9  -4   4  240.38   15.50
   9   4   4  245.98   15.20
  10  -4   4    7.30    5.90
  10   4   4   10.40    6.20
  11  -4   4   22.90    4.20
  11  -4   4   18.10    7.80
  11   4   4   20.20    4.90
  11   4   4   14.70    3.10
  12  -4   4   40.90   10.70
  12  -4   4   37.30    5.30
 -12   4  -4   28.40    7.00
  12   4   4   34.10    4.90
  12   4   4   49.80    7.00
  13  -4   4   68.19    6.10
  13  -4   4   44.80   19.20
  13   4   4   52.89    5.40
  13   4   4   62.29    7.70
  14   4   4   27.80    4.80
 -17   5   4    6.10    2.70
  16  -5  -4   -0.20    1.90
  16   5  -4    1.70    1.80
 -16   5   4    5.60    2.80
  15  -5  -4   65.89    6.00
 -15   5   4   48.90    6.30
  15   5  -4   60.49    5.20
  14  -5  -4   48.70    5.80
  14   5  -4   37.50    4.60
 -14   5   4   34.40    5.90
  13  -5  -4   29.60    4.70
  13   5  -4   18.20    3.30
 -13   5   4   25.10    4.50
  12  -5  -4  105.49    8.30
  12  -5  -4  113.49   14.10
 -12   5   4   82.59    8.10
  12   5  -4   87.49    6.80
  12   5  -4   92.59   13.20
  11  -5  -4  154.38   14.10
  11  -5  -4  149.69   10.10
  11   5  -4  153.98   15.40
 -11   5   4  139.89   10.20
  11   5  -4  165.68    9.50
  10  -5  -4    2.00    4.50
 -10  -5   4    6.60    6.70
  10   5  -4    0.30    5.70
   9  -5  -4   46.70    6.90
  -9  -5   4   48.60    7.50
  -9  -5   4   50.09    8.20
   9   5  -4   55.69    7.60
   9   5  -4   59.29   10.30
  -8  -5   4  203.08   12.70
  -8  -5   4  233.78   14.20
   8  -5  -4  226.28   13.40
   8   5  -4  211.38   15.30
   8   5  -4  233.28   12.90
  -7  -5   4   49.80    6.00
  -7  -5   4   49.00    5.60
   7  -5  -4   56.09    5.80
   7   5  -4   62.19    8.00
   7   5  -4   61.59    5.40
   6  -5  -4   35.50    4.50
  -6  -5   4   33.70    4.60
  -6  -5   4   32.30    5.20
   6   5  -4   38.60    6.10
   6   5  -4   37.80    4.30
  -5  -5   4   56.49    5.30
   5  -5  -4   47.00    4.80
  -5  -5   4   51.39    4.80
   5   5  -4   68.99    6.80
   5   5  -4   61.99    4.40
   4  -5  -4  362.96   18.00
   4  -5  -4  355.66   20.60
  -4  -5   4  389.46   18.30
   4   5  -4  393.56   19.20
   4   5  -4  376.76   17.10
  -3  -5   4  511.35   22.10
   3  -5  -4  491.75   21.70
   3  -5  -4  497.25   25.00
   3   5  -4  421.66   20.50
   3   5  -4  438.96   22.50
   2  -5  -4  623.74   28.20
  -2  -5   4  640.64   28.60
   2   5  -4  625.34   27.10
   2   5  -4  626.14   29.30
  -2   5   4  652.63   29.70
  -1  -5   4  653.73   30.50
   1  -5  -4  636.84   30.10
   1   5  -4  704.73   31.50
   1   5  -4  689.73   29.10
  -1   5   4  740.53   30.80
   0  -5  -4   77.59    4.50
   0  -5   4   70.09    4.80
   0   5   4   72.19    4.40
   1  -5   4  680.43   30.00
   1  -5   4  697.63   30.60
   2  -5   4  618.14   28.10
   2  -5   4  641.74   27.90
  -3  -5  -4  429.96   19.20
   3  -5   4  413.96   19.10
  -3  -5  -4  389.46   18.20
   4  -5   4  355.36   17.30
  -4  -5  -4  359.66   16.00
  -4  -5  -4  360.96   17.40
   5  -5   4   60.39    5.50
  -5  -5  -4   67.89    5.30
  -5  -5  -4   54.29    3.20
   6  -5   4   37.10    5.20
  -6  -5  -4   29.80    4.90
   7  -5   4   64.39    6.40
  -7  -5  -4   53.29    6.50
   8  -5   4  257.77   15.30
   9  -5   4   62.89    8.70
  10  -5   4    0.90    5.10
  11  -5   4  145.89   13.60
  11  -5   4  160.58   10.40
  11   5   4  160.28   11.30
  11   5   4  140.69    9.10
  12  -5   4   93.89    7.70
  12  -5   4   81.49   13.10
  12   5   4   87.29    8.90
  12   5   4  100.79    7.00
 -12   5  -4  114.19   10.00
  13   5   4   22.50    4.70
 -13   5  -4   16.10    5.20
  13   5   4   29.20    4.20
  14   5   4   38.20    6.40
 -14   5  -4   30.90    5.50
 -15   5  -4   57.69    8.30
  15   5   4   61.99    7.20
 -17   6   4   13.30    2.80
  16   6  -4   13.10    2.10
 -16   6   4   11.80    3.00
  15  -6  -4    4.50    2.40
 -15   6   4    1.00    3.00
  15   6  -4    1.70    1.90
  14  -6  -4   35.60    5.60
  14   6  -4   35.80    4.20
 -14   6   4   30.20    4.60
  13  -6  -4    7.00    3.40
 -13   6   4    1.80    2.80
  13   6  -4    0.30    2.20
  12  -6  -4   10.00    3.60
  12  -6  -4    3.10    7.90
 -12   6   4    8.20    3.40
  12   6  -4   16.30    3.00
  11  -6  -4   76.59   11.40
  11  -6  -4   58.99    7.30
 -11   6   4   74.69    7.20
  11   6  -4   70.39   10.90
  11   6  -4   71.19    6.00
  10  -6  -4  102.79   10.50
  10   6  -4   83.59   11.30
   9  -6  -4    8.60    4.50
  -9  -6   4   -0.70    5.10
  -9  -6   4    9.10    5.00
   9   6  -4   13.70    5.20
   9   6  -4   11.20    6.10
   8  -6  -4  402.16   20.60
  -8  -6   4  380.36   21.30
  -8  -6   4  389.46   19.90
   8   6  -4  384.56   22.10
   8   6  -4  373.56   19.70
  -7  -6   4   57.99    6.30
   7  -6  -4   50.29    5.90
  -7  -6   4   52.79    6.00
   7   6  -4   48.70    7.30
   7   6  -4   48.60    5.20
   6  -6  -4   49.90    5.50
  -6  -6   4   47.90    5.50
  -6  -6   4   59.49    6.20
   6   6  -4   41.80    6.40
   6   6  -4   45.70    4.50
   5  -6  -4  260.87   13.70
  -5  -6   4  270.97   14.30
  -5  -6   4  275.57   13.80
   5   6  -4  245.18   14.50
   5   6  -4  236.08   12.30
   4  -6  -4  737.23   33.90
  -4  -6   4  753.32   34.20
   4   6  -4  782.32   35.00
   4   6  -4  730.73   32.60
   3  -6  -4  802.42   37.20
  -3  -6   4  857.21   37.70
   3   6  -4  853.51   38.40
   3   6  -4  840.12   35.90
   2  -6  -4 1299.07   55.69
  -2  -6   4 1307.47   56.19
   2   6  -4 1261.47   56.79
  -2   6   4 1255.97   56.89
   1  -6  -4   47.50    3.50
  -1  -6   4   43.60    3.80
  -1   6   4   38.80    4.60
   1   6  -4   38.20    4.60
   0  -6   4  171.08    9.30
   0  -6  -4  176.08    8.90
   0   6   4  190.38    8.80
   1  -6   4   35.30    3.40
   1  -6   4   35.20    2.80
   2  -6   4 1251.97   54.19
   2  -6   4 1232.08   53.79
  -3  -6  -4  814.82   36.70
   3  -6   4  871.21   37.50
  -3  -6  -4  848.92   37.60
   4  -6   4  772.62   34.70
  -4  -6  -4  794.52   34.90
  -4  -6  -4  736.03   33.50
   5  -6   4  230.58   12.40
  -5  -6  -4  211.78   10.60
  -5  -6  -4  233.28   12.50
  -6  -6  -4   53.89    5.60
   6  -6   4   48.40    5.40
   7  -6   4   56.39    6.30
  -7  -6  -4   60.69    7.00
   8  -6   4  372.16   20.50
   9  -6   4    4.80    4.70
  10  -6   4   75.19   10.70
  11  -6   4   81.09   12.20
  11  -6   4   72.29    7.20
 -11   6  -4   69.09    8.50
  11   6   4   68.49    6.00
  11   6   4   83.29    8.20
  12  -6   4   11.20    9.20
  12  -6   4   10.30    3.20
  12   6   4   12.20    2.70
  12   6   4    9.60    4.00
 -12   6  -4   17.80    4.90
  13   6   4    3.10    2.10
  13   6   4    3.50    3.50
 -13   6  -4   12.80    4.40
 -14   6  -4   21.80    4.80
  14   6   4   26.60    4.40
  15   6   4   -2.00    3.30
 -15   6  -4    7.00    4.00
 -16   6  -4   12.90    4.30
 -17   7   4   43.30    4.40
  16   7  -4   16.40    2.70
 -16   7   4   27.80    4.20
  15  -7  -4   12.10    2.80
  15   7  -4   13.90    2.50
 -15   7   4   11.00    3.30
  14  -7  -4   13.30    3.70
 -14   7   4   13.20    3.30
  14   7  -4   13.10    2.70
  13  -7  -4   48.40    6.40
  13   7  -4   53.19    5.20
 -13   7   4   43.20    5.90
  12  -7  -4   40.80    6.10
  12  -7  -4   21.10    9.20
  12   7  -4   31.70    4.30
 -12   7   4   26.40    4.30
  12   7  -4   27.60    5.30
  11  -7  -4   45.60    6.70
  11  -7  -4   27.90    8.30
 -11   7   4   32.20    4.70
  11   7  -4   22.50    5.20
  11   7  -4   40.50    4.80
 -10  -7   4  118.99   12.80
  10  -7  -4  106.69   10.30
  10   7  -4   97.89    7.00
   9  -7  -4  101.39    9.70
  -9  -7   4  120.19   10.90
  -9  -7   4  110.89   10.60
   9   7  -4  132.39   12.40
   9   7  -4  120.09   10.40
  -8  -7   4  166.18   11.50
  -8  -7   4  180.98   12.40
   8  -7  -4  166.28   11.60
   8   7  -4  167.68   12.90
   8   7  -4  148.49   10.70
  -7  -7   4  418.66   22.30
  -7  -7   4  410.66   21.10
   7  -7  -4  400.66   21.50
   7   7  -4  425.36   22.50
   7   7  -4  434.06   20.40
  -6  -7   4   26.30    4.60
   6  -7  -4   28.10    4.30
  -6  -7   4   30.60    4.70
   6   7  -4   23.60    4.90
   6   7  -4   18.30    3.20
  -5  -7   4  203.88   11.70
   5  -7  -4  186.88   10.80
   5   7  -4  173.78   11.60
  -4  -7   4  528.65   23.00
   4  -7  -4  480.05   22.40
   4   7  -4  450.55   23.20
   4   7  -4  437.46   20.70
  -3  -7   4 1916.91   80.09
   3  -7  -4 1906.21   79.59
   3   7  -4 1802.52   80.49
  -3   7   4 1720.53   81.49
  -2  -7   4  332.87   16.00
   2  -7  -4  336.77   15.40
   2   7  -4  311.27   16.60
  -2   7   4  310.07   17.00
   1  -7  -4  722.83   32.70
  -1  -7   4  716.23   33.30
  -1   7   4  775.82   33.40
   1   7  -4  745.43   34.30
[truncated: 1,647,040 more chars]
