# Supplementary material for: Pseudallenes A and B, new sulfur-containing ovalicin sesquiterpenoid derivatives with antimicrobial activity from the deep-sea cold seep sediment-derived fungus Pseudallescheria boydii CS-793
Source: Beilstein J Org Chem. 2024 Feb 28;20:470–8. doi: 10.3762/bjoc.20.42 (PMC10910587; doi:10.3762/bjoc.20.42)
Supplement: File 2 — X-ray crystallographic files of compounds 1–3. [file Beilstein_J_Org_Chem-20-470-s002.zip › cpd.2.cif]

 
data_t
 
_audit_creation_method            'SHELXL-2018/3'
_shelx_SHELXL_version_number      '2018/3'
_chemical_name_systematic         ?
_chemical_name_common             ?
_chemical_melting_point           ?
_chemical_formula_moiety          'C15 H26 O5 S'
_chemical_formula_sum
 'C15 H26 O5 S' 
_chemical_formula_weight          318.42

loop_
 _atom_type_symbol
 _atom_type_description
 _atom_type_scat_dispersion_real
 _atom_type_scat_dispersion_imag
 _atom_type_scat_source
 'C'  'C'   0.0181   0.0091
 'International Tables Vol C Tables 4.2.6.8 and 6.1.1.4'
 'H'  'H'   0.0000   0.0000
 'International Tables Vol C Tables 4.2.6.8 and 6.1.1.4'
 'O'  'O'   0.0492   0.0322
 'International Tables Vol C Tables 4.2.6.8 and 6.1.1.4'
 'S'  'S'   0.3331   0.5567
 'International Tables Vol C Tables 4.2.6.8 and 6.1.1.4'
 
_space_group_crystal_system       triclinic
_space_group_IT_number            1
_space_group_name_H-M_alt         'P 1'
_space_group_name_Hall            'P 1'
 
_shelx_space_group_comment
;
The symmetry employed for this shelxl refinement is uniquely defined
by the following loop, which should always be used as a source of
symmetry information in preference to the above space-group names.
They are only intended as comments.
;
 
loop_
 _space_group_symop_operation_xyz
 'x, y, z'
 
_cell_length_a                    6.50160(10)
_cell_length_b                    7.7295(2)
_cell_length_c                    17.5958(4)
_cell_angle_alpha                 85.4270(10)
_cell_angle_beta                  81.7990(10)
_cell_angle_gamma                 65.1510(10)
_cell_volume                      794.00(3)
_cell_formula_units_Z             2
_cell_measurement_temperature     173(2)
_cell_measurement_reflns_used     9924
_cell_measurement_theta_min        2.54
_cell_measurement_theta_max       68.41
 
_exptl_crystal_description        block
_exptl_crystal_colour             colourless
_exptl_crystal_density_meas       ?
_exptl_crystal_density_method     ?
_exptl_crystal_density_diffrn     1.332          
_exptl_crystal_F_000              344
_exptl_transmission_factor_min    ?
_exptl_transmission_factor_max    ?
_exptl_crystal_size_max           0.180
_exptl_crystal_size_mid           0.150
_exptl_crystal_size_min           0.120
_exptl_absorpt_coefficient_mu     1.979
_shelx_estimated_absorpt_T_min    0.717
_shelx_estimated_absorpt_T_max    0.797
_exptl_absorpt_correction_type    multi-scan
_exptl_absorpt_correction_T_min   0.6355 
_exptl_absorpt_correction_T_max   0.7531
_exptl_absorpt_process_details    
;
SADABS-2016/2 - Bruker AXS area detector scaling and absorption correction 
;
_exptl_absorpt_special_details    ?
_diffrn_ambient_temperature       173(2)
_diffrn_radiation_wavelength      1.54178
_diffrn_radiation_type            CuK\a
_diffrn_source                    ?
_diffrn_measurement_device_type   'Bruker D8 VENTURE'
_diffrn_measurement_method        '\f and \w scans'
_diffrn_detector_area_resol_mean  ?
_diffrn_reflns_number             18694
_diffrn_reflns_av_unetI/netI      0.0395
_diffrn_reflns_av_R_equivalents   0.0381
_diffrn_reflns_limit_h_min        -7
_diffrn_reflns_limit_h_max        7
_diffrn_reflns_limit_k_min        -9
_diffrn_reflns_limit_k_max        9
_diffrn_reflns_limit_l_min        -20
_diffrn_reflns_limit_l_max        20
_diffrn_reflns_theta_min          2.538
_diffrn_reflns_theta_max          66.525
_diffrn_reflns_theta_full         66.525
_diffrn_measured_fraction_theta_max   0.999
_diffrn_measured_fraction_theta_full  0.999
_diffrn_reflns_Laue_measured_fraction_max    0.999
_diffrn_reflns_Laue_measured_fraction_full   0.999
_diffrn_reflns_point_group_measured_fraction_max   0.974
_diffrn_reflns_point_group_measured_fraction_full  0.974
_reflns_number_total              5468
_reflns_number_gt                 5118
_reflns_threshold_expression      'I > 2\s(I)'
_reflns_Friedel_coverage          0.950
_reflns_Friedel_fraction_max      0.949
_reflns_Friedel_fraction_full     0.949
 
_reflns_special_details
;
 Reflections were merged by SHELXL according to the crystal
 class for the calculation of statistics and refinement.
 
 _reflns_Friedel_fraction is defined as the number of unique
 Friedel pairs measured divided by the number that would be
 possible theoretically, ignoring centric projections and
 systematic absences.
;
 
_computing_data_collection        ?
_computing_cell_refinement        ?
_computing_data_reduction         ?
_computing_structure_solution     'SHELXT 2018/2 (Sheldrick, 2018)'
_computing_structure_refinement 'SHELXL-2018/3 (Sheldrick, 2018)'
_computing_molecular_graphics     ?
_computing_publication_material   ?
_refine_special_details           ?
_refine_ls_structure_factor_coef  Fsqd
_refine_ls_matrix_type            full
_refine_ls_weighting_scheme       calc
_refine_ls_weighting_details
'w=1/[\s^2^(Fo^2^)+(0.0414P)^2^+0.0426P] where P=(Fo^2^+2Fc^2^)/3'
_atom_sites_solution_primary      ?
_atom_sites_solution_secondary    ?
_atom_sites_solution_hydrogens    mixed
_refine_ls_hydrogen_treatment     mixed
_refine_ls_extinction_method      none
_refine_ls_extinction_coef        .
_refine_ls_abs_structure_details
;
 Flack x determined using 2345 quotients [(I+)-(I-)]/[(I+)+(I-)]
 (Parsons, Flack and Wagner, Acta Cryst. B69 (2013) 249-259).
;
_refine_ls_abs_structure_Flack    0.048(7)
_chemical_absolute_configuration  ad
_refine_ls_number_reflns          5468
_refine_ls_number_parameters      415
_refine_ls_number_restraints      3
_refine_ls_R_factor_all           0.0322
_refine_ls_R_factor_gt            0.0287
_refine_ls_wR_factor_ref          0.0736
_refine_ls_wR_factor_gt           0.0714
_refine_ls_goodness_of_fit_ref    1.034
_refine_ls_restrained_S_all       1.033
_refine_ls_shift/su_max           0.000
_refine_ls_shift/su_mean          0.000
 
loop_
 _atom_site_label
 _atom_site_type_symbol
 _atom_site_fract_x
 _atom_site_fract_y
 _atom_site_fract_z
 _atom_site_U_iso_or_equiv
 _atom_site_adp_type
 _atom_site_occupancy
 _atom_site_site_symmetry_order  
 _atom_site_calc_flag
 _atom_site_refinement_flags_posn
 _atom_site_refinement_flags_adp
 _atom_site_refinement_flags_occupancy
 _atom_site_disorder_assembly
 _atom_site_disorder_group
S1 S 0.56337(11) 0.45179(11) 0.78114(5) 0.0273(2) Uani 1 1 d . . . . .
S2 S 0.73175(11) 0.55159(10) 0.20549(5) 0.02581(19) Uani 1 1 d . . . . .
O1 O 0.0076(4) 0.2660(3) 0.51643(12) 0.0202(5) Uani 1 1 d . . . . .
H50 H -0.113(8) 0.296(6) 0.532(2) 0.030 Uiso 1 1 d . U . . .
O2 O -0.1324(3) 0.5755(3) 0.61311(12) 0.0187(4) Uani 1 1 d . . . . .
H51 H -0.162(6) 0.629(5) 0.568(2) 0.028 Uiso 1 1 d . U . . .
O3 O 0.5822(3) 0.3653(3) 0.61169(12) 0.0217(5) Uani 1 1 d . . . . .
H45 H 0.616(7) 0.439(6) 0.633(2) 0.033 Uiso 1 1 d . U . . .
O4 O 0.1085(4) 0.3191(3) 0.73713(12) 0.0187(4) Uani 1 1 d . . . . .
H43 H -0.004(7) 0.395(6) 0.755(2) 0.028 Uiso 1 1 d . U . . .
O5 O -0.0901(3) 0.7006(3) 0.74403(13) 0.0218(5) Uani 1 1 d . . . . .
H44 H -0.140(7) 0.684(6) 0.710(2) 0.033 Uiso 1 1 d . U . . .
O6 O 0.1110(3) 0.6847(3) 0.25140(12) 0.0184(4) Uani 1 1 d . . . . .
H47 H 0.090(6) 0.608(6) 0.233(2) 0.028 Uiso 1 1 d . U . . .
O7 O 0.2972(4) 0.3036(3) 0.24326(13) 0.0215(5) Uani 1 1 d . . . . .
H52 H 0.212(7) 0.303(6) 0.276(2) 0.032 Uiso 1 1 d . U . . .
O8 O -0.2104(3) 0.7331(3) 0.47183(12) 0.0195(4) Uani 1 1 d . . . . .
H48 H -0.302(6) 0.711(5) 0.450(2) 0.029 Uiso 1 1 d . U . . .
O9 O 0.0332(3) 0.4256(3) 0.37477(12) 0.0185(4) Uani 1 1 d . . . . .
H49 H 0.023(6) 0.376(6) 0.415(2) 0.028 Uiso 1 1 d . U . . .
O10 O 0.5363(4) 0.6347(3) 0.37609(12) 0.0208(5) Uani 1 1 d . . . . .
H46 H 0.663(7) 0.568(6) 0.353(2) 0.031 Uiso 1 1 d . U . . .
C1 C -0.1670(7) 0.8188(7) 0.9639(3) 0.0531(11) Uani 1 1 d . . . . .
H4 H -0.259502 0.946045 0.984658 0.080 Uiso 1 1 calc R U . . .
H1 H -0.218060 0.726443 0.991978 0.080 Uiso 1 1 calc R U . . .
H5 H -0.184223 0.820194 0.909371 0.080 Uiso 1 1 calc R U . . .
C2 C 0.0792(6) 0.7632(5) 0.9725(2) 0.0314(8) Uani 1 1 d . . . . .
C3 C 0.2388(6) 0.7479(5) 0.91513(19) 0.0261(7) Uani 1 1 d . . . . .
H6 H 0.388409 0.714075 0.927785 0.031 Uiso 1 1 calc R U . . .
C4 C 0.2073(6) 0.7788(5) 0.83162(18) 0.0267(7) Uani 1 1 d . . . . .
H19 H 0.311015 0.834603 0.805251 0.032 Uiso 1 1 calc R U . . .
H7 H 0.048491 0.870733 0.826256 0.032 Uiso 1 1 calc R U . . .
C5 C 0.2565(5) 0.5907(4) 0.79275(17) 0.0190(6) Uani 1 1 d . . . . .
H18 H 0.188127 0.518110 0.829463 0.023 Uiso 1 1 calc R U . . .
C6 C 0.1506(5) 0.6177(4) 0.71715(16) 0.0178(6) Uani 1 1 d . . . . .
C7 C 0.2058(5) 0.4194(4) 0.68195(16) 0.0152(6) Uani 1 1 d . . . . .
C8 C 0.4644(5) 0.2817(4) 0.66765(18) 0.0186(6) Uani 1 1 d . . . . .
C9 C 0.4980(5) 0.0928(4) 0.63448(19) 0.0229(7) Uani 1 1 d . . . . .
H12 H 0.663411 0.015623 0.620743 0.027 Uiso 1 1 calc R U . . .
H11 H 0.440923 0.020914 0.674573 0.027 Uiso 1 1 calc R U . . .
C10 C 0.3759(5) 0.1186(4) 0.56348(18) 0.0215(6) Uani 1 1 d . . . . .
H10 H 0.445657 0.174822 0.520592 0.026 Uiso 1 1 calc R U . . .
H2 H 0.392483 -0.006974 0.547425 0.026 Uiso 1 1 calc R U . . .
C11 C 0.1335(8) 0.7216(6) 1.0543(2) 0.0458(10) Uani 1 1 d . . . . .
H3 H 0.293520 0.696963 1.055895 0.069 Uiso 1 1 calc R U . . .
H21 H 0.107851 0.609341 1.074199 0.069 Uiso 1 1 calc R U . . .
H20 H 0.034377 0.831611 1.085926 0.069 Uiso 1 1 calc R U . . .
C12 C 0.1260(5) 0.2479(4) 0.58180(16) 0.0177(6) Uani 1 1 d . . . . .
H8 H 0.058832 0.190307 0.625802 0.021 Uiso 1 1 calc R U . . .
C13 C 0.1044(5) 0.4417(4) 0.60567(16) 0.0153(6) Uani 1 1 d . . . . .
H9 H 0.191952 0.490292 0.564910 0.018 Uiso 1 1 calc R U . . .
C14 C 0.5721(5) 0.2387(5) 0.74275(19) 0.0253(7) Uani 1 1 d . . . . .
H13 H 0.732718 0.144303 0.733324 0.030 Uiso 1 1 calc R U . . .
H14 H 0.489132 0.182158 0.780870 0.030 Uiso 1 1 calc R U . . .
C15 C 0.2056(6) 0.7576(4) 0.66109(18) 0.0235(7) Uani 1 1 d . . . . .
H15 H 0.138849 0.766446 0.613605 0.035 Uiso 1 1 calc R U . . .
H17 H 0.371556 0.712638 0.649438 0.035 Uiso 1 1 calc R U . . .
H16 H 0.141669 0.883504 0.684187 0.035 Uiso 1 1 calc R U . . .
C16 C 1.0291(9) 0.2802(6) -0.0527(2) 0.0545(12) Uani 1 1 d . . . . .
H32 H 0.883430 0.319785 -0.073379 0.082 Uiso 1 1 calc R U . . .
H31 H 1.143254 0.165862 -0.078882 0.082 Uiso 1 1 calc R U . . .
H22 H 1.080851 0.383208 -0.060991 0.082 Uiso 1 1 calc R U . . .
C17 C 0.9983(6) 0.2371(5) 0.0318(2) 0.0321(8) Uani 1 1 d . . . . .
C18 C 0.7937(6) 0.2678(5) 0.06873(19) 0.0280(7) Uani 1 1 d . . . . .
H33 H 0.670502 0.319118 0.038507 0.034 Uiso 1 1 calc R U . . .
C19 C 0.7317(5) 0.2316(5) 0.15242(18) 0.0253(7) Uani 1 1 d . . . . .
H34 H 0.872633 0.171730 0.177801 0.030 Uiso 1 1 calc R U . . .
H27 H 0.658427 0.141317 0.156993 0.030 Uiso 1 1 calc R U . . .
C20 C 0.5690(5) 0.4160(4) 0.19350(17) 0.0182(6) Uani 1 1 d . . . . .
H35 H 0.453681 0.492229 0.158141 0.022 Uiso 1 1 calc R U . . .
C21 C 0.4365(5) 0.3861(4) 0.26939(17) 0.0170(6) Uani 1 1 d . . . . .
C22 C 0.2668(5) 0.5831(4) 0.30613(16) 0.0146(6) Uani 1 1 d . . . . .
C23 C 0.3785(5) 0.7201(4) 0.32031(17) 0.0179(6) Uani 1 1 d . . . . .
C24 C 0.1978(5) 0.9078(4) 0.35398(18) 0.0216(6) Uani 1 1 d . . . . .
H24 H 0.099327 0.979950 0.314055 0.026 Uiso 1 1 calc R U . . .
H41 H 0.275427 0.985075 0.367677 0.026 Uiso 1 1 calc R U . . .
C25 C 0.0465(5) 0.8821(4) 0.42531(18) 0.0220(6) Uani 1 1 d . . . . .
H42 H 0.139593 0.825375 0.468125 0.026 Uiso 1 1 calc R U . . .
H23 H -0.074549 1.007594 0.441494 0.026 Uiso 1 1 calc R U . . .
C26 C 0.5000(5) 0.7636(5) 0.24535(18) 0.0244(7) Uani 1 1 d . . . . .
H25 H 0.560291 0.856977 0.254952 0.029 Uiso 1 1 calc R U . . .
H26 H 0.388788 0.821881 0.207682 0.029 Uiso 1 1 calc R U . . .
C27 C 1.2138(7) 0.1612(7) 0.0685(3) 0.0476(10) Uani 1 1 d . . . . .
H28 H 1.177506 0.154553 0.124350 0.071 Uiso 1 1 calc R U . . .
H29 H 1.291815 0.246006 0.055683 0.071 Uiso 1 1 calc R U . . .
H30 H 1.313499 0.033421 0.049513 0.071 Uiso 1 1 calc R U . . .
C28 C 0.5904(5) 0.2449(4) 0.32403(18) 0.0224(7) Uani 1 1 d . . . . .
H38 H 0.498116 0.234785 0.371902 0.034 Uiso 1 1 calc R U . . .
H37 H 0.703586 0.289159 0.335178 0.034 Uiso 1 1 calc R U . . .
H36 H 0.668780 0.119697 0.300278 0.034 Uiso 1 1 calc R U . . .
C29 C 0.1304(5) 0.5588(4) 0.38268(16) 0.0143(6) Uani 1 1 d . . . . .
H40 H 0.235611 0.509764 0.423274 0.017 Uiso 1 1 calc R U . . .
C30 C -0.0601(5) 0.7530(4) 0.40659(16) 0.0173(6) Uani 1 1 d . . . . .
H39 H -0.150793 0.810931 0.362605 0.021 Uiso 1 1 calc R U . . .
 
loop_
 _atom_site_aniso_label
 _atom_site_aniso_U_11
 _atom_site_aniso_U_22
 _atom_site_aniso_U_33
 _atom_site_aniso_U_23
 _atom_site_aniso_U_13
 _atom_site_aniso_U_12
S1 0.0173(4) 0.0411(5) 0.0261(4) -0.0053(3) -0.0038(3) -0.0136(3)
S2 0.0202(4) 0.0361(5) 0.0261(4) -0.0050(3) 0.0028(3) -0.0175(3)
O1 0.0199(10) 0.0233(11) 0.0188(11) -0.0032(9) -0.0004(9) -0.0103(9)
O2 0.0153(10) 0.0190(11) 0.0186(11) -0.0012(9) -0.0026(8) -0.0035(8)
O3 0.0179(11) 0.0292(12) 0.0225(11) -0.0045(9) 0.0019(9) -0.0148(9)
O4 0.0176(10) 0.0201(11) 0.0186(11) 0.0021(9) 0.0010(9) -0.0095(9)
O5 0.0166(11) 0.0249(12) 0.0224(12) -0.0075(9) -0.0026(9) -0.0058(9)
O6 0.0174(10) 0.0202(11) 0.0183(11) 0.0009(9) -0.0077(8) -0.0068(9)
O7 0.0199(11) 0.0257(12) 0.0237(12) -0.0076(9) 0.0027(9) -0.0144(9)
O8 0.0168(10) 0.0240(11) 0.0170(10) -0.0037(8) -0.0010(8) -0.0074(9)
O9 0.0197(10) 0.0202(11) 0.0187(10) -0.0021(8) 0.0000(9) -0.0119(9)
O10 0.0132(10) 0.0275(12) 0.0224(11) -0.0041(9) -0.0056(9) -0.0074(9)
C1 0.039(2) 0.066(3) 0.053(3) -0.014(2) 0.007(2) -0.021(2)
C2 0.0398(19) 0.0263(18) 0.0281(18) -0.0062(14) -0.0021(15) -0.0134(15)
C3 0.0291(17) 0.0268(18) 0.0253(17) -0.0033(14) -0.0084(14) -0.0123(15)
C4 0.0359(19) 0.0276(18) 0.0211(16) -0.0037(13) -0.0034(14) -0.0171(15)
C5 0.0160(14) 0.0227(16) 0.0191(15) 0.0001(12) -0.0008(12) -0.0094(12)
C6 0.0148(14) 0.0189(15) 0.0197(15) -0.0028(12) -0.0009(12) -0.0068(12)
C7 0.0148(14) 0.0155(14) 0.0164(14) -0.0002(11) -0.0002(11) -0.0078(11)
C8 0.0131(13) 0.0204(15) 0.0207(15) 0.0019(12) 0.0002(11) -0.0064(11)
C9 0.0160(14) 0.0196(16) 0.0300(17) -0.0015(13) -0.0009(13) -0.0049(12)
C10 0.0204(15) 0.0176(15) 0.0248(16) -0.0048(12) 0.0009(13) -0.0067(12)
C11 0.070(3) 0.038(2) 0.0243(19) -0.0011(16) -0.0028(18) -0.019(2)
C12 0.0215(15) 0.0177(15) 0.0165(14) 0.0016(12) -0.0036(12) -0.0106(12)
C13 0.0134(14) 0.0148(14) 0.0164(15) -0.0008(12) 0.0012(11) -0.0055(11)
C14 0.0160(15) 0.0283(17) 0.0279(17) 0.0021(14) -0.0063(13) -0.0049(13)
C15 0.0335(17) 0.0199(16) 0.0195(16) 0.0001(13) -0.0041(13) -0.0130(14)
C16 0.080(3) 0.046(2) 0.031(2) -0.0045(19) 0.020(2) -0.027(2)
C17 0.0380(19) 0.0259(18) 0.0307(19) -0.0086(14) 0.0106(16) -0.0148(15)
C18 0.0307(18) 0.0289(18) 0.0210(16) -0.0033(14) -0.0020(14) -0.0089(15)
C19 0.0214(15) 0.0260(17) 0.0233(16) -0.0029(13) 0.0051(13) -0.0068(13)
C20 0.0153(13) 0.0229(15) 0.0181(14) 0.0006(12) -0.0023(11) -0.0097(12)
C21 0.0146(13) 0.0179(15) 0.0194(15) -0.0012(12) -0.0018(12) -0.0075(12)
C22 0.0134(13) 0.0153(14) 0.0153(14) -0.0004(11) -0.0054(11) -0.0051(11)
C23 0.0180(14) 0.0182(15) 0.0206(15) 0.0001(12) -0.0052(12) -0.0096(12)
C24 0.0214(15) 0.0162(15) 0.0301(17) -0.0020(13) -0.0055(13) -0.0097(12)
C25 0.0213(15) 0.0171(15) 0.0265(17) -0.0059(13) -0.0028(13) -0.0058(12)
C26 0.0286(17) 0.0247(17) 0.0262(17) 0.0005(13) -0.0008(14) -0.0180(14)
C27 0.032(2) 0.058(3) 0.053(3) -0.016(2) 0.0115(18) -0.0220(19)
C28 0.0221(15) 0.0187(15) 0.0208(16) 0.0012(12) -0.0029(13) -0.0034(12)
C29 0.0136(13) 0.0126(14) 0.0171(15) 0.0002(11) -0.0033(11) -0.0054(11)
C30 0.0168(14) 0.0175(15) 0.0159(14) -0.0008(12) -0.0018(11) -0.0054(12)
 
_geom_special_details
;
 All esds (except the esd in the dihedral angle between two l.s. planes)
 are estimated using the full covariance matrix.  The cell esds are taken
 into account individually in the estimation of esds in distances, angles
 and torsion angles; correlations between esds in cell parameters are only
 used when they are defined by crystal symmetry.  An approximate (isotropic)
 treatment of cell esds is used for estimating esds involving l.s. planes.
;
 
loop_
 _geom_bond_atom_site_label_1
 _geom_bond_atom_site_label_2
 _geom_bond_distance
 _geom_bond_site_symmetry_2
 _geom_bond_publ_flag
S1 C14 1.806(3) . ?
S1 C5 1.815(3) . ?
S2 C26 1.804(3) . ?
S2 C20 1.814(3) . ?
O1 C12 1.439(3) . ?
O1 H50 0.73(4) . ?
O2 C13 1.443(3) . ?
O2 H51 0.87(4) . ?
O3 C8 1.440(3) . ?
O3 H45 0.82(4) . ?
O4 C7 1.436(3) . ?
O4 H43 0.76(4) . ?
O5 C6 1.442(3) . ?
O5 H44 0.76(4) . ?
O6 C22 1.435(3) . ?
O6 H47 0.77(4) . ?
O7 C21 1.446(3) . ?
O7 H52 0.75(4) . ?
O8 C30 1.440(3) . ?
O8 H48 0.84(4) . ?
O9 C29 1.440(3) . ?
O9 H49 0.79(4) . ?
O10 C23 1.438(4) . ?
O10 H46 0.83(4) . ?
C1 C2 1.500(5) . ?
C1 H4 0.9800 . ?
C1 H1 0.9800 . ?
C1 H5 0.9800 . ?
C2 C3 1.314(5) . ?
C2 C11 1.509(5) . ?
C3 C4 1.499(4) . ?
C3 H6 0.9500 . ?
C4 C5 1.545(4) . ?
C4 H19 0.9900 . ?
C4 H7 0.9900 . ?
C5 C6 1.544(4) . ?
C5 H18 1.0000 . ?
C6 C15 1.524(4) . ?
C6 C7 1.578(4) . ?
C7 C13 1.545(4) . ?
C7 C8 1.562(4) . ?
C8 C14 1.531(4) . ?
C8 C9 1.534(4) . ?
C9 C10 1.530(4) . ?
C9 H12 0.9900 . ?
C9 H11 0.9900 . ?
C10 C12 1.510(4) . ?
C10 H10 0.9900 . ?
C10 H2 0.9900 . ?
C11 H3 0.9800 . ?
C11 H21 0.9800 . ?
C11 H20 0.9800 . ?
C12 C13 1.532(4) . ?
C12 H8 1.0000 . ?
C13 H9 1.0000 . ?
C14 H13 0.9900 . ?
C14 H14 0.9900 . ?
C15 H15 0.9800 . ?
C15 H17 0.9800 . ?
C15 H16 0.9800 . ?
C16 C17 1.501(5) . ?
C16 H32 0.9800 . ?
C16 H31 0.9800 . ?
C16 H22 0.9800 . ?
C17 C18 1.327(5) . ?
C17 C27 1.494(6) . ?
C18 C19 1.506(4) . ?
C18 H33 0.9500 . ?
C19 C20 1.534(4) . ?
C19 H34 0.9900 . ?
C19 H27 0.9900 . ?
C20 C21 1.539(4) . ?
C20 H35 1.0000 . ?
C21 C28 1.518(4) . ?
C21 C22 1.580(4) . ?
C22 C29 1.547(4) . ?
C22 C23 1.565(4) . ?
C23 C26 1.527(4) . ?
C23 C24 1.530(4) . ?
C24 C25 1.534(4) . ?
C24 H24 0.9900 . ?
C24 H41 0.9900 . ?
C25 C30 1.511(4) . ?
C25 H42 0.9900 . ?
C25 H23 0.9900 . ?
C26 H25 0.9900 . ?
C26 H26 0.9900 . ?
C27 H28 0.9800 . ?
C27 H29 0.9800 . ?
C27 H30 0.9800 . ?
C28 H38 0.9800 . ?
C28 H37 0.9800 . ?
C28 H36 0.9800 . ?
C29 C30 1.534(4) . ?
C29 H40 1.0000 . ?
C30 H39 1.0000 . ?
 
loop_
 _geom_angle_atom_site_label_1
 _geom_angle_atom_site_label_2
 _geom_angle_atom_site_label_3
 _geom_angle
 _geom_angle_site_symmetry_1
 _geom_angle_site_symmetry_3
 _geom_angle_publ_flag
C14 S1 C5 98.85(14) . . ?
C26 S2 C20 98.47(14) . . ?
C12 O1 H50 105(3) . . ?
C13 O2 H51 108(2) . . ?
C8 O3 H45 110(3) . . ?
C7 O4 H43 106(3) . . ?
C6 O5 H44 102(3) . . ?
C22 O6 H47 105(3) . . ?
C21 O7 H52 108(3) . . ?
C30 O8 H48 101(2) . . ?
C29 O9 H49 108(3) . . ?
C23 O10 H46 109(3) . . ?
C2 C1 H4 109.5 . . ?
C2 C1 H1 109.5 . . ?
H4 C1 H1 109.5 . . ?
C2 C1 H5 109.5 . . ?
H4 C1 H5 109.5 . . ?
H1 C1 H5 109.5 . . ?
C3 C2 C1 124.5(3) . . ?
C3 C2 C11 121.3(3) . . ?
C1 C2 C11 114.1(3) . . ?
C2 C3 C4 126.2(3) . . ?
C2 C3 H6 116.9 . . ?
C4 C3 H6 116.9 . . ?
C3 C4 C5 111.8(3) . . ?
C3 C4 H19 109.3 . . ?
C5 C4 H19 109.3 . . ?
C3 C4 H7 109.3 . . ?
C5 C4 H7 109.3 . . ?
H19 C4 H7 107.9 . . ?
C6 C5 C4 114.3(3) . . ?
C6 C5 S1 112.9(2) . . ?
C4 C5 S1 107.8(2) . . ?
C6 C5 H18 107.2 . . ?
C4 C5 H18 107.2 . . ?
S1 C5 H18 107.2 . . ?
O5 C6 C15 109.0(2) . . ?
O5 C6 C5 101.7(2) . . ?
C15 C6 C5 112.7(2) . . ?
O5 C6 C7 106.8(2) . . ?
C15 C6 C7 114.6(2) . . ?
C5 C6 C7 111.1(2) . . ?
O4 C7 C13 109.0(2) . . ?
O4 C7 C8 104.4(2) . . ?
C13 C7 C8 107.5(2) . . ?
O4 C7 C6 107.4(2) . . ?
C13 C7 C6 112.3(2) . . ?
C8 C7 C6 115.7(2) . . ?
O3 C8 C14 110.0(2) . . ?
O3 C8 C9 106.4(2) . . ?
C14 C8 C9 108.6(2) . . ?
O3 C8 C7 110.0(2) . . ?
C14 C8 C7 110.5(2) . . ?
C9 C8 C7 111.3(2) . . ?
C10 C9 C8 113.4(2) . . ?
C10 C9 H12 108.9 . . ?
C8 C9 H12 108.9 . . ?
C10 C9 H11 108.9 . . ?
C8 C9 H11 108.9 . . ?
H12 C9 H11 107.7 . . ?
C12 C10 C9 109.6(2) . . ?
C12 C10 H10 109.7 . . ?
C9 C10 H10 109.7 . . ?
C12 C10 H2 109.7 . . ?
C9 C10 H2 109.7 . . ?
H10 C10 H2 108.2 . . ?
C2 C11 H3 109.5 . . ?
C2 C11 H21 109.5 . . ?
H3 C11 H21 109.5 . . ?
C2 C11 H20 109.5 . . ?
H3 C11 H20 109.5 . . ?
H21 C11 H20 109.5 . . ?
O1 C12 C10 110.0(2) . . ?
O1 C12 C13 111.7(2) . . ?
C10 C12 C13 108.8(2) . . ?
O1 C12 H8 108.8 . . ?
C10 C12 H8 108.8 . . ?
C13 C12 H8 108.8 . . ?
O2 C13 C12 109.7(2) . . ?
O2 C13 C7 110.8(2) . . ?
C12 C13 C7 109.9(2) . . ?
O2 C13 H9 108.8 . . ?
C12 C13 H9 108.8 . . ?
C7 C13 H9 108.8 . . ?
C8 C14 S1 111.4(2) . . ?
C8 C14 H13 109.3 . . ?
S1 C14 H13 109.3 . . ?
C8 C14 H14 109.3 . . ?
S1 C14 H14 109.3 . . ?
H13 C14 H14 108.0 . . ?
C6 C15 H15 109.5 . . ?
C6 C15 H17 109.5 . . ?
H15 C15 H17 109.5 . . ?
C6 C15 H16 109.5 . . ?
H15 C15 H16 109.5 . . ?
H17 C15 H16 109.5 . . ?
C17 C16 H32 109.5 . . ?
C17 C16 H31 109.5 . . ?
H32 C16 H31 109.5 . . ?
C17 C16 H22 109.5 . . ?
H32 C16 H22 109.5 . . ?
H31 C16 H22 109.5 . . ?
C18 C17 C27 124.6(3) . . ?
C18 C17 C16 121.2(4) . . ?
C27 C17 C16 114.2(3) . . ?
C17 C18 C19 128.3(3) . . ?
C17 C18 H33 115.8 . . ?
C19 C18 H33 115.8 . . ?
C18 C19 C20 111.9(3) . . ?
C18 C19 H34 109.2 . . ?
C20 C19 H34 109.2 . . ?
C18 C19 H27 109.2 . . ?
C20 C19 H27 109.2 . . ?
H34 C19 H27 107.9 . . ?
C19 C20 C21 114.6(2) . . ?
C19 C20 S2 107.9(2) . . ?
C21 C20 S2 112.6(2) . . ?
C19 C20 H35 107.1 . . ?
C21 C20 H35 107.1 . . ?
S2 C20 H35 107.1 . . ?
O7 C21 C28 108.7(2) . . ?
O7 C21 C20 101.9(2) . . ?
C28 C21 C20 112.9(2) . . ?
O7 C21 C22 106.6(2) . . ?
C28 C21 C22 114.5(2) . . ?
C20 C21 C22 111.2(2) . . ?
O6 C22 C29 109.3(2) . . ?
O6 C22 C23 104.4(2) . . ?
C29 C22 C23 107.8(2) . . ?
O6 C22 C21 106.9(2) . . ?
C29 C22 C21 112.7(2) . . ?
C23 C22 C21 115.3(2) . . ?
O10 C23 C26 110.4(2) . . ?
O10 C23 C24 106.5(2) . . ?
C26 C23 C24 108.9(2) . . ?
O10 C23 C22 109.6(2) . . ?
C26 C23 C22 110.6(2) . . ?
C24 C23 C22 110.8(2) . . ?
C23 C24 C25 113.9(2) . . ?
C23 C24 H24 108.8 . . ?
C25 C24 H24 108.8 . . ?
C23 C24 H41 108.8 . . ?
C25 C24 H41 108.8 . . ?
H24 C24 H41 107.7 . . ?
C30 C25 C24 109.3(2) . . ?
C30 C25 H42 109.8 . . ?
C24 C25 H42 109.8 . . ?
C30 C25 H23 109.8 . . ?
C24 C25 H23 109.8 . . ?
H42 C25 H23 108.3 . . ?
C23 C26 S2 111.8(2) . . ?
C23 C26 H25 109.2 . . ?
S2 C26 H25 109.2 . . ?
C23 C26 H26 109.2 . . ?
S2 C26 H26 109.2 . . ?
H25 C26 H26 107.9 . . ?
C17 C27 H28 109.5 . . ?
C17 C27 H29 109.5 . . ?
H28 C27 H29 109.5 . . ?
C17 C27 H30 109.5 . . ?
H28 C27 H30 109.5 . . ?
H29 C27 H30 109.5 . . ?
C21 C28 H38 109.5 . . ?
C21 C28 H37 109.5 . . ?
H38 C28 H37 109.5 . . ?
C21 C28 H36 109.5 . . ?
H38 C28 H36 109.5 . . ?
H37 C28 H36 109.5 . . ?
O9 C29 C30 109.8(2) . . ?
O9 C29 C22 110.7(2) . . ?
C30 C29 C22 109.3(2) . . ?
O9 C29 H40 109.0 . . ?
C30 C29 H40 109.0 . . ?
C22 C29 H40 109.0 . . ?
O8 C30 C25 110.2(2) . . ?
O8 C30 C29 111.1(2) . . ?
C25 C30 C29 108.9(2) . . ?
O8 C30 H39 108.8 . . ?
C25 C30 H39 108.8 . . ?
C29 C30 H39 108.8 . . ?
 
loop_
 _geom_torsion_atom_site_label_1
 _geom_torsion_atom_site_label_2
 _geom_torsion_atom_site_label_3
 _geom_torsion_atom_site_label_4
 _geom_torsion
 _geom_torsion_site_symmetry_1
 _geom_torsion_site_symmetry_2
 _geom_torsion_site_symmetry_3
 _geom_torsion_site_symmetry_4
 _geom_torsion_publ_flag
C1 C2 C3 C4 -1.2(6) . . . . ?
C11 C2 C3 C4 177.8(3) . . . . ?
C2 C3 C4 C5 -92.9(4) . . . . ?
C3 C4 C5 C6 159.9(3) . . . . ?
C3 C4 C5 S1 -73.8(3) . . . . ?
C14 S1 C5 C6 -57.0(2) . . . . ?
C14 S1 C5 C4 175.8(2) . . . . ?
C4 C5 C6 O5 -65.8(3) . . . . ?
S1 C5 C6 O5 170.55(19) . . . . ?
C4 C5 C6 C15 50.7(3) . . . . ?
S1 C5 C6 C15 -73.0(3) . . . . ?
C4 C5 C6 C7 -179.2(2) . . . . ?
S1 C5 C6 C7 57.2(3) . . . . ?
O5 C6 C7 O4 -49.3(3) . . . . ?
C15 C6 C7 O4 -170.1(2) . . . . ?
C5 C6 C7 O4 60.8(3) . . . . ?
O5 C6 C7 C13 70.6(3) . . . . ?
C15 C6 C7 C13 -50.2(3) . . . . ?
C5 C6 C7 C13 -179.3(2) . . . . ?
O5 C6 C7 C8 -165.4(2) . . . . ?
C15 C6 C7 C8 73.8(3) . . . . ?
C5 C6 C7 C8 -55.4(3) . . . . ?
O4 C7 C8 O3 179.0(2) . . . . ?
C13 C7 C8 O3 63.3(3) . . . . ?
C6 C7 C8 O3 -63.2(3) . . . . ?
O4 C7 C8 C14 -59.3(3) . . . . ?
C13 C7 C8 C14 -175.0(2) . . . . ?
C6 C7 C8 C14 58.5(3) . . . . ?
O4 C7 C8 C9 61.4(3) . . . . ?
C13 C7 C8 C9 -54.3(3) . . . . ?
C6 C7 C8 C9 179.2(2) . . . . ?
O3 C8 C9 C10 -67.5(3) . . . . ?
C14 C8 C9 C10 174.1(2) . . . . ?
C7 C8 C9 C10 52.2(3) . . . . ?
C8 C9 C10 C12 -54.5(3) . . . . ?
C9 C10 C12 O1 -177.4(2) . . . . ?
C9 C10 C12 C13 60.0(3) . . . . ?
O1 C12 C13 O2 50.4(3) . . . . ?
C10 C12 C13 O2 172.1(2) . . . . ?
O1 C12 C13 C7 172.6(2) . . . . ?
C10 C12 C13 C7 -65.8(3) . . . . ?
O4 C7 C13 O2 70.4(3) . . . . ?
C8 C7 C13 O2 -176.9(2) . . . . ?
C6 C7 C13 O2 -48.5(3) . . . . ?
O4 C7 C13 C12 -51.0(3) . . . . ?
C8 C7 C13 C12 61.6(3) . . . . ?
C6 C7 C13 C12 -170.0(2) . . . . ?
O3 C8 C14 S1 58.6(3) . . . . ?
C9 C8 C14 S1 174.7(2) . . . . ?
C7 C8 C14 S1 -63.0(3) . . . . ?
C5 S1 C14 C8 59.6(2) . . . . ?
C27 C17 C18 C19 -1.4(6) . . . . ?
C16 C17 C18 C19 179.4(3) . . . . ?
C17 C18 C19 C20 117.9(4) . . . . ?
C18 C19 C20 C21 160.5(3) . . . . ?
C18 C19 C20 S2 -73.2(3) . . . . ?
C26 S2 C20 C19 174.9(2) . . . . ?
C26 S2 C20 C21 -57.7(2) . . . . ?
C19 C20 C21 O7 -64.6(3) . . . . ?
S2 C20 C21 O7 171.54(19) . . . . ?
C19 C20 C21 C28 51.8(3) . . . . ?
S2 C20 C21 C28 -72.0(3) . . . . ?
C19 C20 C21 C22 -177.9(2) . . . . ?
S2 C20 C21 C22 58.3(3) . . . . ?
O7 C21 C22 O6 -50.3(3) . . . . ?
C28 C21 C22 O6 -170.5(2) . . . . ?
C20 C21 C22 O6 60.0(3) . . . . ?
O7 C21 C22 C29 69.8(3) . . . . ?
C28 C21 C22 C29 -50.4(3) . . . . ?
C20 C21 C22 C29 -179.9(2) . . . . ?
O7 C21 C22 C23 -165.8(2) . . . . ?
C28 C21 C22 C23 74.0(3) . . . . ?
C20 C21 C22 C23 -55.6(3) . . . . ?
O6 C22 C23 O10 178.8(2) . . . . ?
C29 C22 C23 O10 62.7(3) . . . . ?
C21 C22 C23 O10 -64.2(3) . . . . ?
O6 C22 C23 C26 -59.2(3) . . . . ?
C29 C22 C23 C26 -175.4(2) . . . . ?
C21 C22 C23 C26 57.7(3) . . . . ?
O6 C22 C23 C24 61.6(3) . . . . ?
C29 C22 C23 C24 -54.6(3) . . . . ?
C21 C22 C23 C24 178.5(2) . . . . ?
O10 C23 C24 C25 -66.9(3) . . . . ?
C26 C23 C24 C25 174.0(2) . . . . ?
C22 C23 C24 C25 52.2(3) . . . . ?
C23 C24 C25 C30 -54.6(3) . . . . ?
O10 C23 C26 S2 58.8(3) . . . . ?
C24 C23 C26 S2 175.4(2) . . . . ?
C22 C23 C26 S2 -62.7(3) . . . . ?
C20 S2 C26 C23 59.8(2) . . . . ?
O6 C22 C29 O9 70.3(3) . . . . ?
C23 C22 C29 O9 -176.8(2) . . . . ?
C21 C22 C29 O9 -48.4(3) . . . . ?
O6 C22 C29 C30 -50.7(3) . . . . ?
C23 C22 C29 C30 62.1(3) . . . . ?
C21 C22 C29 C30 -169.5(2) . . . . ?
C24 C25 C30 O8 -177.6(2) . . . . ?
C24 C25 C30 C29 60.2(3) . . . . ?
O9 C29 C30 O8 50.6(3) . . . . ?
C22 C29 C30 O8 172.2(2) . . . . ?
O9 C29 C30 C25 172.2(2) . . . . ?
C22 C29 C30 C25 -66.2(3) . . . . ?
 
_refine_diff_density_max    0.344
_refine_diff_density_min   -0.160
_refine_diff_density_rms    0.037

_shelx_res_file
;
TITL t_a.res in P1
    t.res
    created by SHELXL-2018/3 at 16:31:42 on 22-Dec-2022
CELL 1.54178 6.5016 7.7295 17.5958 85.427 81.799 65.151
ZERR 2.00 0.0001 0.0002 0.0004 0.001 0.001 0.001
LATT -1
SFAC C H O S
UNIT 30 52 10 2
LIST 6 ! automatically inserted. Change 6 to 4 for CHECKCIF!!
TEMP -100.150
ACTA
SIZE 0.18 0.15 0.12
CONF
L.S. 4
FMAP 2
PLAN -5 0 0.00
HTAB
BOND $H
CONF
WGHT    0.041400    0.042600
FVAR       1.39929
S1    4    0.563367    0.451786    0.781136    11.00000    0.01735    0.04114 =
         0.02611   -0.00532   -0.00378   -0.01361
S2    4    0.731748    0.551589    0.205490    11.00000    0.02019    0.03613 =
         0.02611   -0.00497    0.00278   -0.01752
O1    3    0.007634    0.265965    0.516431    11.00000    0.01987    0.02326 =
         0.01878   -0.00319   -0.00041   -0.01033
H50   2   -0.112832    0.295723    0.531991    11.00000   -1.50000
O2    3   -0.132376    0.575476    0.613109    11.00000    0.01526    0.01895 =
         0.01862   -0.00123   -0.00257   -0.00351
H51   2   -0.162404    0.628563    0.568126    11.00000   -1.50000
O3    3    0.582172    0.365291    0.611692    11.00000    0.01788    0.02920 =
         0.02252   -0.00447    0.00190   -0.01485
H45   2    0.615627    0.439090    0.632757    11.00000   -1.50000
O4    3    0.108477    0.319055    0.737129    11.00000    0.01758    0.02015 =
         0.01861    0.00209    0.00100   -0.00950
H43   2   -0.004434    0.394652    0.754820    11.00000   -1.50000
O5    3   -0.090128    0.700556    0.744031    11.00000    0.01657    0.02491 =
         0.02236   -0.00745   -0.00265   -0.00578
H44   2   -0.140371    0.684234    0.710201    11.00000   -1.50000
O6    3    0.111038    0.684683    0.251404    11.00000    0.01739    0.02019 =
         0.01827    0.00093   -0.00765   -0.00681
H47   2    0.089612    0.607787    0.232816    11.00000   -1.50000
O7    3    0.297185    0.303605    0.243261    11.00000    0.01989    0.02565 =
         0.02373   -0.00763    0.00273   -0.01438
H52   2    0.211707    0.302625    0.276309    11.00000   -1.50000
O8    3   -0.210370    0.733076    0.471825    11.00000    0.01675    0.02405 =
         0.01698   -0.00370   -0.00102   -0.00740
H48   2   -0.302190    0.710553    0.449999    11.00000   -1.50000
O9    3    0.033231    0.425569    0.374766    11.00000    0.01972    0.02020 =
         0.01872   -0.00211    0.00004   -0.01190
H49   2    0.023011    0.375890    0.415261    11.00000   -1.50000
O10   3    0.536326    0.634682    0.376089    11.00000    0.01323    0.02749 =
         0.02236   -0.00408   -0.00559   -0.00742
H46   2    0.663246    0.567507    0.353275    11.00000   -1.50000
C1    1   -0.166983    0.818790    0.963875    11.00000    0.03854    0.06564 =
         0.05283   -0.01425    0.00727   -0.02097
AFIX 137
H4    2   -0.259502    0.946045    0.984658    11.00000   -1.50000
H1    2   -0.218060    0.726443    0.991978    11.00000   -1.50000
H5    2   -0.184223    0.820194    0.909371    11.00000   -1.50000
AFIX   0
C2    1    0.079197    0.763207    0.972472    11.00000    0.03977    0.02631 =
         0.02809   -0.00623   -0.00211   -0.01344
C3    1    0.238832    0.747902    0.915128    11.00000    0.02906    0.02680 =
         0.02532   -0.00335   -0.00844   -0.01227
AFIX  43
H6    2    0.388409    0.714075    0.927785    11.00000   -1.20000
AFIX   0
C4    1    0.207255    0.778770    0.831622    11.00000    0.03593    0.02761 =
         0.02109   -0.00375   -0.00341   -0.01710
AFIX  23
H19   2    0.311015    0.834603    0.805251    11.00000   -1.20000
H7    2    0.048491    0.870733    0.826256    11.00000   -1.20000
AFIX   0
C5    1    0.256531    0.590716    0.792753    11.00000    0.01602    0.02275 =
         0.01913    0.00013   -0.00083   -0.00943
AFIX  13
H18   2    0.188127    0.518110    0.829463    11.00000   -1.20000
AFIX   0
C6    1    0.150636    0.617747    0.717152    11.00000    0.01475    0.01887 =
         0.01972   -0.00281   -0.00087   -0.00681
C7    1    0.205841    0.419387    0.681949    11.00000    0.01477    0.01549 =
         0.01641   -0.00018   -0.00020   -0.00778
C8    1    0.464352    0.281706    0.667653    11.00000    0.01308    0.02043 =
         0.02070    0.00195    0.00024   -0.00640
C9    1    0.498030    0.092767    0.634480    11.00000    0.01603    0.01962 =
         0.02999   -0.00147   -0.00092   -0.00485
AFIX  23
H12   2    0.663411    0.015623    0.620743    11.00000   -1.20000
H11   2    0.440923    0.020914    0.674573    11.00000   -1.20000
AFIX   0
C10   1    0.375913    0.118558    0.563483    11.00000    0.02041    0.01763 =
         0.02476   -0.00482    0.00093   -0.00668
AFIX  23
H10   2    0.445657    0.174822    0.520592    11.00000   -1.20000
H2    2    0.392483   -0.006974    0.547425    11.00000   -1.20000
AFIX   0
C11   1    0.133494    0.721638    1.054292    11.00000    0.06994    0.03847 =
         0.02427   -0.00112   -0.00283   -0.01872
AFIX 137
H3    2    0.293520    0.696963    1.055895    11.00000   -1.50000
H21   2    0.107851    0.609341    1.074199    11.00000   -1.50000
H20   2    0.034377    0.831611    1.085926    11.00000   -1.50000
AFIX   0
C12   1    0.125986    0.247861    0.581795    11.00000    0.02149    0.01767 =
         0.01646    0.00156   -0.00359   -0.01059
AFIX  13
H8    2    0.058832    0.190307    0.625802    11.00000   -1.20000
AFIX   0
C13   1    0.104377    0.441692    0.605670    11.00000    0.01342    0.01484 =
         0.01638   -0.00076    0.00120   -0.00547
AFIX  13
H9    2    0.191952    0.490292    0.564910    11.00000   -1.20000
AFIX   0
C14   1    0.572084    0.238711    0.742747    11.00000    0.01597    0.02828 =
         0.02788    0.00209   -0.00629   -0.00492
AFIX  23
H13   2    0.732718    0.144303    0.733324    11.00000   -1.20000
H14   2    0.489132    0.182158    0.780870    11.00000   -1.20000
AFIX   0
C15   1    0.205580    0.757560    0.661093    11.00000    0.03349    0.01992 =
         0.01945    0.00005   -0.00406   -0.01304
AFIX 137
H15   2    0.138849    0.766446    0.613605    11.00000   -1.50000
H17   2    0.371556    0.712638    0.649438    11.00000   -1.50000
H16   2    0.141669    0.883504    0.684187    11.00000   -1.50000
AFIX   0
C16   1    1.029129    0.280229   -0.052700    11.00000    0.08027    0.04590 =
         0.03064   -0.00452    0.01992   -0.02727
AFIX 137
H32   2    0.883430    0.319785   -0.073379    11.00000   -1.50000
H31   2    1.143254    0.165862   -0.078882    11.00000   -1.50000
H22   2    1.080851    0.383208   -0.060991    11.00000   -1.50000
AFIX   0
C17   1    0.998261    0.237077    0.031795    11.00000    0.03797    0.02585 =
         0.03069   -0.00858    0.01059   -0.01476
C18   1    0.793702    0.267753    0.068725    11.00000    0.03067    0.02888 =
         0.02105   -0.00326   -0.00198   -0.00887
AFIX  43
H33   2    0.670502    0.319118    0.038507    11.00000   -1.20000
AFIX   0
C19   1    0.731742    0.231582    0.152422    11.00000    0.02136    0.02599 =
         0.02333   -0.00289    0.00511   -0.00683
AFIX  23
H34   2    0.872633    0.171730    0.177801    11.00000   -1.20000
H27   2    0.658427    0.141317    0.156993    11.00000   -1.20000
AFIX   0
C20   1    0.569039    0.416034    0.193503    11.00000    0.01526    0.02291 =
         0.01815    0.00058   -0.00228   -0.00968
AFIX  13
H35   2    0.453681    0.492229    0.158141    11.00000   -1.20000
AFIX   0
C21   1    0.436525    0.386096    0.269386    11.00000    0.01456    0.01790 =
         0.01941   -0.00125   -0.00180   -0.00753
C22   1    0.266776    0.583135    0.306134    11.00000    0.01339    0.01528 =
         0.01528   -0.00042   -0.00539   -0.00506
C23   1    0.378455    0.720117    0.320309    11.00000    0.01796    0.01817 =
         0.02060    0.00015   -0.00519   -0.00965
C24   1    0.197804    0.907835    0.353980    11.00000    0.02140    0.01618 =
         0.03009   -0.00198   -0.00552   -0.00970
AFIX  23
H24   2    0.099327    0.979950    0.314055    11.00000   -1.20000
H41   2    0.275427    0.985075    0.367677    11.00000   -1.20000
AFIX   0
C25   1    0.046548    0.882099    0.425313    11.00000    0.02125    0.01707 =
         0.02648   -0.00587   -0.00276   -0.00579
AFIX  23
H42   2    0.139593    0.825375    0.468125    11.00000   -1.20000
H23   2   -0.074549    1.007594    0.441494    11.00000   -1.20000
AFIX   0
C26   1    0.499965    0.763564    0.245348    11.00000    0.02858    0.02468 =
         0.02622    0.00045   -0.00081   -0.01798
AFIX  23
H25   2    0.560291    0.856977    0.254952    11.00000   -1.20000
H26   2    0.388788    0.821881    0.207682    11.00000   -1.20000
AFIX   0
C27   1    1.213808    0.161242    0.068491    11.00000    0.03189    0.05815 =
         0.05331   -0.01558    0.01146   -0.02196
AFIX 137
H28   2    1.177506    0.154553    0.124350    11.00000   -1.50000
H29   2    1.291815    0.246006    0.055683    11.00000   -1.50000
H30   2    1.313499    0.033421    0.049513    11.00000   -1.50000
AFIX   0
C28   1    0.590392    0.244919    0.324030    11.00000    0.02213    0.01874 =
         0.02081    0.00118   -0.00290   -0.00339
AFIX 137
H38   2    0.498116    0.234785    0.371902    11.00000   -1.50000
H37   2    0.703586    0.289159    0.335178    11.00000   -1.50000
H36   2    0.668780    0.119697    0.300278    11.00000   -1.50000
AFIX   0
C29   1    0.130410    0.558816    0.382681    11.00000    0.01356    0.01256 =
         0.01710    0.00018   -0.00329   -0.00543
AFIX  13
H40   2    0.235611    0.509764    0.423274    11.00000   -1.20000
AFIX   0
C30   1   -0.060110    0.753024    0.406586    11.00000    0.01678    0.01753 =
         0.01590   -0.00080   -0.00178   -0.00543
AFIX  13
H39   2   -0.150793    0.810931    0.362605    11.00000   -1.20000
REM #####
REM #####
AFIX   0
HKLF 4 1 1 0 0 0 1 0 0 0 1


REM  t_a.res in P1
REM wR2 = 0.073611, GooF = S = 1.03358, Restrained GooF = 1.03327 for all data
REM R1 = 0.028685 for 5118 Fo > 4sig(Fo) and 0.032199 for all 5468 data
REM 415 parameters refined using 3 restraints

END

WGHT      0.0356      0.0663

REM Instructions for potential hydrogen bonds
EQIV $1 x-1, y, z
HTAB O1 O3_$1
HTAB O2 O8
HTAB O3 S1
EQIV $2 x+1, y, z
HTAB O3 O2_$2
HTAB O4 S1_$1
HTAB O4 O5
HTAB O5 O2
HTAB O6 S2_$1
HTAB O6 O7
HTAB O7 O9
HTAB O8 O10_$1
HTAB O9 O1
HTAB O10 S2
HTAB O10 O9_$2
HTAB C15 O3
HTAB C28 O10

REM Highest difference peak  0.344,  deepest hole -0.160,  1-sigma level  0.037
Q1    1   0.9592  0.5577  0.2058  11.00000  0.05    0.34
Q2    1   0.3389  0.4426  0.7826  11.00000  0.05    0.33
Q3    1   0.7744  0.4747  0.7796  11.00000  0.05    0.23
Q4    1   0.9320  0.1754  0.0501  11.00000  0.05    0.18
Q5    1   0.4988  0.4088  0.2352  11.00000  0.05    0.17
;
_shelx_res_checksum   37757

_shelx_hkl_file
;
  -1   0   0 2501.45  105.59
  -1   0   0 2545.85  104.89
   1   0   0 2551.94  105.79
   1   0   0 2553.14  104.79
   1   0   0 2377.16  104.99
  -2   0   0 3491.85  144.59
  -2   0   0 3379.06  144.19
   2   0   0 3321.37  143.19
   2   0   0 3429.96  142.59
   2   0   0 3406.16  145.99
  -3   0   0 1201.48   54.59
  -3   0   0 1222.38   55.69
  -3   0   0 1196.48   54.99
  -3   0   0 1202.88   56.39
   3   0   0 1310.57   57.29
   3   0   0 1197.98   52.79
  -4   0   0  508.25   26.70
  -4   0   0  501.15   29.90
  -4   0   0  474.85   27.60
  -4   0   0  460.85   26.90
  -4   0   0  455.25   29.70
  -4   0   0  495.65   29.70
   4   0   0  513.75   32.80
   4   0   0  483.85   31.70
   4   0   0  517.65   30.10
  -5   0   0  305.77   28.20
  -5   0   0  310.07   21.10
  -5   0   0  235.78   27.10
  -5   0   0  321.27   21.40
   5   0   0  284.67   26.80
   5   0   0  299.67   25.20
   5   0   0  292.77   26.40
   5   0   0  254.37   28.10
   5   0   0  306.47   28.10
  -6   0   0  488.75   32.00
  -6   0   0  477.75   28.20
  -6   0   0  508.85   29.60
   6   0   0  482.55   30.90
   6   0   0  501.55   33.00
   6   0   0  460.85   27.10
   6   0   0  443.06   31.50
   6  -1   0  170.98   17.00
   6  -1   0  130.39   17.50
   6  -1   0  146.09   18.60
  -6   1   0  141.19   19.50
  -6   1   0  112.09   15.90
  -6   1   0  134.39   14.10
  -6   1   0  131.99   16.00
   5  -1   0   38.00   13.00
   5  -1   0   25.60   12.60
   5  -1   0   29.70   10.20
   5  -1   0   39.00   12.70
   5  -1   0   33.70   15.40
  -5   1   0   48.10    9.30
  -5   1   0   43.20    9.50
  -5   1   0   39.40   14.50
  -5   1   0   53.09   18.30
   4  -1   0  548.45   34.60
   4  -1   0  511.95   32.00
   4  -1   0  542.25   32.90
   4  -1   0  479.55   35.10
   4  -1   0  511.25   33.90
   4  -1   0  510.75   33.50
  -4   1   0  464.05   28.30
  -4   1   0  521.05   28.00
  -4   1   0  494.65   32.30
   3  -1   0  346.97   20.50
  -3   1   0  314.47   20.00
  -3   1   0  258.37   18.30
  -3   1   0  302.17   17.60
  -3   1   0  324.47   17.80
   2  -1   0 4432.86  174.88
   2  -1   0 4288.07  176.58
  -2   1   0 4157.88  173.98
  -2   1   0 4202.88  174.18
  -2   1   0 3575.84  173.58
   1  -1   0 2330.57   93.19
   1  -1   0 2365.76   92.89
   1  -1   0 2248.48   93.69
  -1   1   0 2073.99   93.29
  -1   1   0 2129.39   92.99
  -1   1   0 1977.00   91.69
  -1  -1   0 1256.97   51.79
   1   1   0 1199.88   51.49
   1   1   0 1137.89   51.79
   1   1   0 1198.48   52.29
  -2  -1   0  785.22   34.90
  -2  -1   0  798.02   35.30
   2   1   0  750.62   33.30
   2   1   0  738.33   35.80
   2   1   0  781.02   35.10
   2   1   0  761.02   36.00
   2   1   0  740.23   33.50
  -3  -1   0 1623.44   73.99
  -3  -1   0 1726.23   74.89
  -3  -1   0 1693.83   75.59
  -3  -1   0 1674.13   75.99
   3   1   0 1743.43   76.99
   3   1   0 1675.63   71.99
  -4  -1   0  389.46   21.70
  -4  -1   0  352.36   21.90
  -4  -1   0  381.96   22.70
  -4  -1   0  342.67   24.20
  -4  -1   0  342.87   23.90
   4   1   0  390.26   23.70
   4   1   0  374.86   24.90
  -5  -1   0  717.63   42.00
  -5  -1   0  750.82   38.20
  -5  -1   0  729.43   40.90
  -5  -1   0  761.02   42.90
  -5  -1   0  718.63   47.10
  -5  -1   0  704.93   41.80
  -5  -1   0  769.52   38.60
   5   1   0  737.33   42.60
   5   1   0  718.43   41.90
   5   1   0  617.04   46.00
  -6  -1   0  529.65   35.00
  -6  -1   0  601.44   32.70
  -6  -1   0  563.54   33.10
   6   1   0  477.25   38.30
   6   1   0  626.14   36.40
   6   1   0  580.44   34.10
   6   1   0  595.64   37.20
  -7  -1   0  928.41   46.90
  -7  -1   0  911.81   48.40
  -7  -1   0  978.30   46.90
  -7  -1   0  989.30   45.30
   7   1   0  941.61   46.80
   6  -2   0   79.19   11.50
   6  -2   0   88.29   13.90
  -6   2   0   76.59   11.60
   5  -2   0  198.18   21.10
   5  -2   0  183.58   20.20
   5  -2   0  211.68   22.10
  -5   2   0  249.48   23.50
  -5   2   0  202.78   17.60
  -5   2   0  227.68   27.00
  -5   2   0  198.88   18.70
   4  -2   0  134.39   21.80
   4  -2   0  123.79   20.00
   4  -2   0  155.38   23.40
   4  -2   0  132.89   18.00
   4  -2   0  160.48   20.30
   4  -2   0  142.69   20.50
  -4   2   0  142.09   23.40
  -4   2   0  148.59   16.10
  -4   2   0  115.09   14.20
  -4   2   0  119.19   21.00
   3  -2   0   72.39   12.70
   3  -2   0   70.89   14.60
   3  -2   0   44.40   12.60
   3  -2   0   56.79   14.70
  -3   2   0   46.00    9.60
  -3   2   0   53.39    9.40
  -3   2   0   45.10    9.30
   2  -2   0 1569.84   67.49
  -2   2   0 1346.47   63.69
  -2   2   0 1474.45   66.79
   1  -2   0 1544.35   69.19
   1  -2   0 1474.15   66.99
  -1   2   0 1668.73   68.99
   0  -2   0 6550.84  286.87
   0  -2   0 6718.33  287.97
   0  -2   0 7295.17  288.37
   0   2   0 6934.21  286.17
   0   2   0 7094.49  287.47
   0   2   0 6562.04  287.87
  -1  -2   0 1570.84   64.09
  -1  -2   0 1479.25   63.69
   1   2   0 1469.45   63.29
   1   2   0 1483.35   65.39
   1   2   0 1424.76   64.69
   1   2   0 1447.46   63.99
  -2  -2   0  901.41   42.50
  -2  -2   0  938.21   43.00
   2   2   0  939.51   44.50
   2   2   0  928.91   43.70
   2   2   0 1005.40   42.90
  -3  -2   0  264.87   16.50
  -3  -2   0  242.48   17.70
  -3  -2   0  250.87   16.80
  -3  -2   0  233.98   15.80
   3   2   0  325.07   18.80
   3   2   0  301.27   17.00
   3   2   0  290.27   15.00
   3   2   0  297.37   19.80
   3   2   0  281.07   14.70
  -4  -2   0  527.75   27.70
  -4  -2   0  525.55   30.20
  -4  -2   0  544.75   30.30
  -4  -2   0  483.85   27.50
  -4  -2   0  543.05   28.90
   4   2   0  469.05   30.50
  -5  -2   0  522.15   38.00
  -5  -2   0  579.94   31.90
  -5  -2   0  599.84   34.20
  -5  -2   0  554.44   35.30
  -5  -2   0  566.74   31.20
  -5  -2   0  574.14   35.40
   5   2   0  531.25   39.90
   5   2   0  575.74   36.40
   5   2   0  609.74   37.60
   5   2   0  581.54   35.70
  -6  -2   0  367.26   24.90
  -6  -2   0  306.77   30.20
  -6  -2   0  372.06   23.50
  -6  -2   0  356.36   26.80
  -6  -2   0  348.97   30.10
   6   2   0  322.37   26.30
   6   2   0  326.17   30.40
  -7  -2   0  321.47   19.60
  -7  -2   0  276.97   23.50
  -7  -2   0  347.97   22.20
   7   2   0  312.47   22.50
   7   2   0  298.47   20.60
   5  -3   0   97.39   15.30
   5  -3   0   82.39   13.70
   5  -3   0  102.19   14.50
  -5   3   0   97.29   13.30
  -5   3   0  101.69   14.80
   4  -3   0  111.99   18.90
   4  -3   0  101.59   15.70
   4  -3   0  107.39   18.10
   4  -3   0  125.69   20.70
  -4   3   0  122.59   17.70
  -4   3   0  118.99   15.80
  -4   3   0  117.39   15.50
   3  -3   0  137.59   19.10
   3  -3   0  152.48   19.70
   3  -3   0  127.59   17.00
   3  -3   0  140.19   20.90
   3  -3   0  143.59   23.40
   3  -3   0  182.28   22.40
  -3   3   0  149.09   19.70
  -3   3   0  149.49   14.10
  -3   3   0  159.38   20.10
  -3   3   0  155.28   16.00
   2  -3   0  494.45   28.20
  -2   3   0  460.05   24.20
  -2   3   0  461.65   27.40
  -2   3   0  415.86   26.40
  -2   3   0  467.95   28.00
   1  -3   0  993.30   45.20
   1  -3   0 1076.49   49.20
  -1   3   0 1093.79   49.20
  -1   3   0  959.10   47.80
  -1   3   0 1062.39   48.30
  -1   3   0  978.00   45.80
   0  -3   0   71.59    6.70
   0  -3   0   68.09    7.60
   0   3   0   82.59    7.60
   0   3   0   66.49    7.00
   0   3   0   74.09    7.40
  -1  -3   0  165.08   10.90
  -1  -3   0  146.19    9.80
  -1  -3   0  165.78    9.70
   1   3   0  151.38    9.40
   1   3   0  138.59   10.10
   1   3   0  155.28   10.20
  -2  -3   0  734.33   34.40
  -2  -3   0  781.22   34.10
  -2  -3   0  746.33   35.20
   2   3   0  701.93   35.20
   2   3   0  649.74   36.70
   2   3   0  672.43   33.50
   2   3   0  710.53   34.10
  -3  -3   0  467.25   26.10
  -3  -3   0  452.55   23.90
  -3  -3   0  495.55   24.70
  -3  -3   0  458.45   25.30
   3   3   0  408.46   24.00
   3   3   0  434.16   25.90
   3   3   0  460.95   28.80
   3   3   0  436.66   24.40
  -4  -3   0  365.96   22.80
  -4  -3   0  378.46   24.60
  -4  -3   0  356.56   21.90
  -4  -3   0  361.66   24.50
  -4  -3   0  370.46   22.00
   4   3   0  355.86   24.60
  -5  -3   0  336.97   22.30
  -5  -3   0  261.97   27.40
  -5  -3   0  267.37   44.70
  -5  -3   0  320.67   21.30
  -5  -3   0  312.47   23.60
  -5  -3   0  309.87   24.80
  -5  -3   0  323.97   25.30
   5   3   0  361.76   32.30
   5   3   0  308.67   29.10
   5   3   0  340.87   26.90
   5   3   0  332.77   28.60
  -6  -3   0  535.05   42.40
  -6  -3   0  549.35   30.10
  -6  -3   0  545.85   35.40
  -6  -3   0  535.45   32.00
  -6  -3   0  471.45   34.40
  -6  -3   0  549.15   33.30
   6   3   0  485.25   37.50
   6   3   0  526.25   34.70
   6   3   0  456.75   40.00
  -7  -3   0  517.65   29.80
  -7  -3   0  476.45   32.50
  -7  -3   0  521.95   37.90
  -7  -3   0  505.95   27.80
   7   3   0  525.25   30.00
   7   3   0  503.05   30.70
   4  -4   0   39.60    9.50
   4  -4   0   38.40   10.90
   4  -4   0   52.59   11.90
   4  -4   0   61.79   11.30
  -4   4   0   46.70   16.10
  -4   4   0   36.00    9.50
  -4   4   0   47.80    9.30
   3  -4   0  136.79   21.50
   3  -4   0   87.59   14.90
   3  -4   0  100.89   17.80
   3  -4   0  135.69   18.80
   3  -4   0  104.69   16.20
  -3   4   0   92.39   13.70
  -3   4   0  103.69   20.20
  -3   4   0  112.39   15.60
  -3   4   0  124.29   21.70
  -3   4   0   88.39   20.00
   2  -4   0  570.64   34.00
   2  -4   0  543.35   34.90
   2  -4   0  577.14   36.00
   2  -4   0  528.75   33.80
   2  -4   0  533.75   34.40
  -2   4   0  505.65   28.30
  -2   4   0  473.65   29.60
  -2   4   0  487.95   33.60
  -2   4   0  493.65   33.70
  -2   4   0  514.85   32.60
   1  -4   0  249.08   19.30
  -1   4   0  203.48   19.90
  -1   4   0  232.18   15.60
  -1   4   0  242.38   19.10
  -1   4   0  219.48   19.30
  -1   4   0  233.08   19.00
   0  -4   0  694.73   34.60
   0  -4   0  610.64   30.70
   0   4   0  666.23   33.80
   0   4   0  628.44   32.60
   0   4   0  665.53   31.80
  -1  -4   0  411.96   21.20
  -1  -4   0  378.36   20.00
  -1  -4   0  380.26   22.10
  -1  -4   0  396.46   19.80
  -1  -4   0  422.96   27.90
   1   4   0  362.66   21.40
   1   4   0  355.36   20.00
   1   4   0  376.26   20.50
  -2  -4   0 1081.69   49.90
  -2  -4   0 1010.20   49.10
  -2  -4   0 1104.49   48.70
   2   4   0  985.50   56.19
   2   4   0 1083.89   51.09
   2   4   0  992.80   48.50
   2   4   0 1073.49   49.50
   2   4   0 1052.49   48.40
  -3  -4   0  221.88   16.50
  -3  -4   0  227.48   17.20
  -3  -4   0  205.78   21.00
  -3  -4   0  222.18   15.30
   3   4   0  178.28   16.30
   3   4   0  157.78   22.20
   3   4   0  199.08   15.70
   3   4   0  172.48   15.20
   3   4   0  191.28   15.30
  -4  -4   0  463.45   30.40
  -4  -4   0  506.35   29.80
  -4  -4   0  465.35   26.30
  -4  -4   0  480.95   30.50
  -4  -4   0  470.85   27.60
  -4  -4   0  514.75   28.30
   4   4   0  468.45   35.90
   4   4   0  431.76   27.30
   4   4   0  440.46   28.40
   4   4   0  465.35   28.60
   4   4   0  480.55   30.50
   4   4   0  456.35   30.50
   4   4   0  428.36   27.30
   4   4   0  491.75   28.70
  -5  -4   0  888.11   46.30
  -5  -4   0  856.71   50.99
  -5  -4   0  856.51   52.89
  -5  -4   0  843.12   42.50
  -5  -4   0  816.92   44.30
  -5  -4   0  890.51   47.80
  -5  -4   0  841.22   45.80
   5   4   0  824.12   48.90
   5   4   0  871.61   49.80
   5   4   0  818.42   46.50
  -6  -4   0   61.09   10.30
  -6  -4   0   46.10   10.30
  -6  -4   0   16.20   20.30
  -6  -4   0   53.79   14.20
  -6  -4   0   70.09   14.60
  -6  -4   0   65.69   14.20
   6   4   0   32.50   13.80
   6   4   0   54.79   13.60
   6   4   0   55.69   14.70
   6   4   0   43.90   16.70
  -7  -4   0   82.59   12.70
  -7  -4   0   83.09   15.70
  -7  -4   0   63.69   10.40
   7   4   0   57.19   10.10
   4  -5   0  224.28   19.20
   4  -5   0  237.98   17.20
   4  -5   0  241.88   17.40
  -4   5   0  253.37   17.20
   3  -5   0  143.09   17.80
   3  -5   0  161.78   18.60
   3  -5   0  149.29   18.20
   3  -5   0  149.79   18.80
  -3   5   0  126.09   16.10
  -3   5   0  115.79   15.90
   2  -5   0  427.56   30.80
   2  -5   0  472.85   30.70
   2  -5   0  353.56   34.00
   2  -5   0  411.96   30.90
   2  -5   0  400.86   30.00
  -2   5   0  414.96   26.10
  -2   5   0  402.26   34.60
  -2   5   0  342.87   41.90
  -2   5   0  316.77   34.60
  -2   5   0  386.36   25.30
   1  -5   0   89.79   16.20
   1  -5   0   53.69   13.80
   1  -5   0   71.09   13.40
   1  -5   0   68.49   12.00
   1  -5   0   72.29   14.20
   1  -5   0   84.39   15.80
   1  -5   0   58.19   14.70
  -1   5   0   55.69   15.30
  -1   5   0   71.29   11.60
  -1   5   0   39.70   12.30
  -1   5   0   64.79   11.00
  -1   5   0   45.30   16.30
   0  -5   0  -11.90    8.30
   0  -5   0    3.70   12.70
   0  -5   0   12.60   11.20
   0  -5   0  -17.20   10.00
   0  -5   0   -2.20    9.70
   0  -5   0    7.80   14.50
   0  -5   0    1.70   12.30
   0   5   0   -3.20    8.80
   0   5   0    9.70    7.90
   0   5   0    8.10    8.60
   0   5   0    7.30    5.70
  -1  -5   0   61.19   11.40
   1   5   0   78.39   10.10
   1   5   0   68.79   10.00
   1   5   0   64.69   12.30
   1   5   0   70.79   12.80
   1   5   0   70.49   11.20
  -2  -5   0 2371.56  106.29
  -2  -5   0 2384.86  104.79
  -2  -5   0 2334.37  105.99
  -2  -5   0 2391.56  105.89
   2   5   0 2397.66  105.29
   2   5   0 2456.05  109.29
   2   5   0 2402.16  105.19
   2   5   0 2351.26  106.89
  -3  -5   0  170.38   22.30
   3   5   0  105.79   13.00
   3   5   0  108.29   15.70
   3   5   0  102.39   15.10
   3   5   0  118.09   14.70
   3   5   0  108.89   13.70
  -4  -5   0  343.37   26.70
  -4  -5   0  396.76   29.60
  -4  -5   0  391.36   25.00
  -4  -5   0  389.96   31.60
  -4  -5   0  392.36   26.60
   4   5   0  351.56   26.30
   4   5   0  310.97   34.70
   4   5   0  367.46   27.70
   4   5   0  365.86   27.10
   4   5   0  333.17   25.40
   4   5   0  334.07   23.80
  -5  -5   0  359.36   25.90
  -5  -5   0  348.17   26.90
  -5  -5   0  367.86   31.90
  -5  -5   0  355.06   25.80
   5   5   0  313.07   31.30
   5   5   0  338.47   29.40
   5   5   0  287.87   26.00
  -6  -5   0  263.97   29.10
  -6  -5   0  216.58   19.90
  -6  -5   0  245.58   23.40
  -6  -5   0  236.18   24.00
   6   5   0  215.08   28.50
   6   5   0  233.48   28.10
   6   5   0  208.08   22.20
   6   5   0  225.88   24.80
  -7  -5   0  274.47   29.60
  -7  -5   0  236.88   23.00
  -7  -5   0  232.88   17.80
   7   5   0  269.57   20.10
   3  -6   0   90.59   13.50
   3  -6   0  122.29   19.90
   3  -6   0  126.69   12.80
  -3   6   0  117.89   13.00
   2  -6   0   13.50   10.30
   2  -6   0   -1.50    8.40
   2  -6   0   28.30   10.70
  -2   6   0   14.00    8.50
  -2   6   0   12.80    7.90
   1  -6   0  297.77   28.60
   1  -6   0  272.77   24.00
   1  -6   0  305.67   48.20
   1  -6   0  242.98   21.90
   1  -6   0  264.17   24.90
  -1   6   0  257.67   21.00
  -1   6   0  269.57   20.70
   0  -6   0 1570.54   75.29
   0  -6   0 1621.34   80.09
   0  -6   0 1719.83   77.99
   0  -6   0 1531.05   81.89
   0  -6   0 1728.83   84.49
   0  -6   0 1679.03   81.89
   0   6   0 1733.53   77.59
   0   6   0 1707.93   77.09
   0   6   0 1667.73   82.49
  -1  -6   0  105.29   18.00
  -1  -6   0  113.39   18.30
  -1  -6   0   76.69   14.80
  -1  -6   0  119.69   14.40
   1   6   0   98.79   16.90
   1   6   0   94.69   12.90
   1   6   0   95.99   13.90
   1   6   0  112.89   18.20
   1   6   0  102.59   16.30
  -2  -6   0  371.66   35.70
  -2  -6   0  353.16   32.20
  -2  -6   0  399.06   27.10
   2   6   0  369.36   27.90
   2   6   0  368.86   27.20
   2   6   0  361.76   23.30
   2   6   0  346.27   29.30
   2   6   0  349.27   23.20
  -3  -6   0  212.68   28.10
  -3  -6   0  192.58   18.90
  -3  -6   0  215.08   21.80
  -3  -6   0  170.38   22.60
  -3  -6   0  203.58   21.70
   3   6   0  202.18   21.30
   3   6   0  168.78   16.90
   3   6   0  166.78   16.60
   3   6   0  200.58   22.00
   3   6   0  163.28   21.20
  -4  -6   0   33.50   12.30
  -4  -6   0   33.80   11.10
  -4  -6   0   21.80   12.90
  -4  -6   0   34.60   12.20
  -4  -6   0   44.70   11.70
   4   6   0   29.60   11.30
   4   6   0   25.30   10.50
   4   6   0   28.40   19.20
   4   6   0   33.70   11.00
   4   6   0   21.40   11.90
   4   6   0   10.70    8.10
  -5  -6   0   79.69   14.20
  -5  -6   0   56.49   13.50
  -5  -6   0   61.39   12.90
  -5  -6   0   50.29   11.80
   5   6   0   61.79   12.00
   5   6   0   59.89   16.80
   5   6   0   37.90   15.10
  -6  -6   0  375.76   28.70
  -6  -6   0  381.46   28.60
  -6  -6   0  361.56   27.80
  -6  -6   0  350.46   24.10
   6   6   0  281.87   30.20
   6   6   0  351.46   25.50
   6   6   0  383.96   29.60
   6   6   0  336.77   34.20
  -7  -6   0  156.48   20.30
  -7  -6   0  119.89   18.50
  -7  -6   0  121.79   13.00
   7   6   0  124.99   15.60
   2  -7   0    6.60    5.90
   2  -7   0   -5.40    6.80
  -2   7   0    0.80    6.60
   1  -7   0  319.17   23.30
   1  -7   0  317.97   21.80
   1  -7   0  311.47   23.10
  -1   7   0  270.97   21.70
  -1   7   0  324.67   21.00
   0  -7   0  456.25   27.80
   0  -7   0  457.75   31.50
   0  -7   0  460.75   30.60
   0   7   0  486.15   28.70
   0   7   0  458.25   33.50
   0   7   0  448.96   27.60
   0   7   0  428.16   36.80
  -1  -7   0   45.10   14.20
  -1  -7   0   22.30   12.00
  -1  -7   0   41.40    9.70
  -1  -7   0   40.90   10.00
   1   7   0   22.40    9.00
   1   7   0   26.60   13.60
   1   7   0   30.70   13.50
  -2  -7   0  118.19   16.60
  -2  -7   0  142.99   20.50
  -2  -7   0  143.49   17.30
   2   7   0  174.78   17.40
   2   7   0  155.28   15.80
   2   7   0  144.69   22.10
   2   7   0  100.59   20.50
   2   7   0  163.18   22.40
  -3  -7   0  417.06   26.80
  -3  -7   0  423.86   28.80
   3   7   0  419.76   26.80
   3   7   0  388.46   38.70
   3   7   0  439.26   28.60
   3   7   0  448.06   34.40
   3   7   0  396.56   30.40
  -4  -7   0   89.49   12.20
  -4  -7   0   82.89   18.10
  -4  -7   0   81.59   17.20
  -4  -7   0   63.99   11.90
  -4  -7   0   76.39   15.30
   4   7   0   69.19   13.50
   4   7   0   50.59    9.90
   4   7   0   41.90   14.90
   4   7   0   48.70   10.90
  -5  -7   0   66.39   12.10
  -5  -7   0   68.99   16.20
  -5  -7   0   66.79   15.30
   5   7   0   65.89   17.90
   5   7   0   74.89   18.10
  -6  -7   0   44.90   10.60
  -6  -7   0   67.49   11.60
  -6  -7   0   52.79   13.70
   6   7   0   77.09   14.00
   6   7   0   68.19   10.30
   0  -8   0   -2.40    6.20
   0  -8   0  -10.40   11.10
   0  -8   0    0.40    7.20
   0   8   0  -10.90    5.90
   0   8   0    3.90    8.30
  -1  -8   0   98.69   17.20
  -1  -8   0   76.69   12.60
  -1  -8   0   81.99   11.60
   1   8   0   78.39   14.20
   1   8   0   81.89   12.90
  -2  -8   0   12.60    7.30
  -2  -8   0    8.50    6.50
  -2  -8   0   12.80   12.20
   2   8   0   12.40   15.60
   2   8   0   18.10   11.00
   2   8   0   20.70    9.30
  -3  -8   0   33.30    8.40
  -3  -8   0   26.00    7.60
   3   8   0   38.40    8.80
   3   8   0   25.50   13.80
   3   8   0   33.40   11.00
  -4  -8   0  206.18   17.90
  -4  -8   0  207.28   17.00
   4   8   0  161.18   29.40
   4   8   0  193.58   18.90
   4   8   0  210.38   18.00
   4   8   0  205.18   24.50
  -5  -8   0  117.89   19.10
  -5  -8   0  114.49   14.30
   5   8   0  106.09   14.10
  -6  -8   0    3.30    6.10
  -6  -8   0    8.80    8.50
   6   8   0   25.00   13.90
   6   8   0   24.50    6.80
  -2  -9   0  106.89   10.50
   2   9   0  106.59   15.30
   2   9   0  115.49   12.10
  -3  -9   0    9.40    5.10
   3   9   0   10.50    7.60
   3   9   0   15.30    7.30
  -4  -9   0   25.90    5.90
  -4  -9   0   30.20    6.50
   4   9   0   20.00    7.20
   4   9   0   34.40    8.60
   4   9  -1   91.99   12.20
   4   9  -1   92.19   13.00
  -4  -9   1   82.79   10.40
   3   9  -1   14.50    7.00
   3   9  -1   11.00    7.70
  -3  -9   1   11.70    5.70
   2   9  -1   45.40    9.80
   2   9  -1   67.19   10.50
  -2  -9   1   71.09    8.80
   6   8  -1    9.10    6.50
   6   8  -1  -10.80   15.30
  -6  -8   1    4.60    6.20
  -6  -8   1    6.70    7.30
   5   8  -1   18.80    7.40
   5   8  -1   19.80   12.00
  -5  -8   1   37.60    7.70
  -5  -8   1   39.70   10.60
   4   8  -1   32.90   17.10
   4   8  -1   31.40    8.40
   4   8  -1   28.30   12.70
   4   8  -1   45.80   10.00
  -4  -8   1   13.80    7.40
  -4  -8   1   26.20    7.80
  -4  -8   1   -4.40   12.50
   3   8  -1  151.08   15.30
   3   8  -1   86.99   18.30
   3   8  -1  129.69   17.50
   3   8  -1  132.29   18.20
  -3  -8   1  114.09   14.60
  -3  -8   1  149.49   14.60
   2   8  -1  123.59   14.50
   2   8  -1  102.29   16.20
   2   8  -1   95.69   14.60
   2   8  -1  105.99   19.00
  -2  -8   1  126.59   19.90
  -2  -8   1  125.09   13.50
   1   8  -1    4.50    6.50
   1   8  -1    3.80    8.40
   1   8  -1    1.80   12.80
  -1  -8   1    5.30   14.70
  -1  -8   1   -2.30    5.40
  -1  -8   1    3.20    9.70
   0   8  -1   25.60    7.30
   0   8  -1   28.00    8.90
   0  -8   1   36.60   13.10
   0  -8   1   17.90    6.90
   0  -8   1   29.10    7.40
   6   7  -1   68.59   14.50
   6   7  -1   47.30    9.10
  -6  -7   1   49.40    9.70
  -6  -7   1   32.70   13.10
   5   7  -1   35.70    9.90
   5   7  -1   50.39   19.70
   5   7  -1   21.10   15.20
   5   7  -1   48.80   11.50
  -5  -7   1   22.40   13.20
  -5  -7   1   39.30   15.40
  -5  -7   1   34.00   10.10
   4   7  -1  115.69   19.40
   4   7  -1  149.99   18.80
   4   7  -1  122.59   15.70
   4   7  -1  153.58   24.30
  -4  -7   1   93.49   15.30
  -4  -7   1  104.79   18.60
  -4  -7   1   88.59   12.70
  -4  -7   1   87.29   13.50
  -4  -7   1  105.19   18.50
   3   7  -1  666.03   38.40
   3   7  -1  669.63   43.90
   3   7  -1  703.13   37.60
   3   7  -1  669.63   40.30
  -3  -7   1  672.73   38.60
  -3  -7   1  696.63   37.30
  -3  -7   1  684.73   42.60
   2   7  -1   -5.50   20.70
   2   7  -1   25.80   12.90
   2   7  -1   24.90   12.20
   2   7  -1   24.40    9.10
   2   7  -1   16.20    7.30
  -2  -7   1   15.40    8.80
  -2  -7   1   15.90   20.30
  -2  -7   1   26.30   14.30
  -2  -7   1   22.70    9.40
  -2  -7   1   24.50   24.80
   1   7  -1  273.87   20.20
   1   7  -1  219.08   27.00
   1   7  -1  261.97   20.20
   1   7  -1  238.28   28.10
  -1  -7   1  235.88   23.90
  -1  -7   1  257.27   20.40
  -1  -7   1  235.28   19.50
  -1  -7   1  243.18   25.30
   0   7  -1  240.28   29.90
   0   7  -1  275.77   20.50
   0   7  -1  274.97   20.50
   0  -7   1  276.87   23.80
   0  -7   1  269.47   20.40
   0  -7   1  278.17   24.20
  -1   7  -1   29.60    9.00
  -1   7  -1   35.10    8.60
   1  -7   1   35.60    9.80
   1  -7   1   54.69   10.40
   1  -7   1   31.40    9.30
  -2   7  -1  183.78   14.70
   2  -7   1  174.88   15.10
   2  -7   1  173.68   14.60
   7   6  -1   23.90    8.40
  -7  -6   1   26.30    7.40
  -7  -6   1   29.30   10.90
  -7  -6   1   23.80    9.90
   6   6  -1   29.30   12.00
   6   6  -1   30.00   16.90
   6   6  -1   31.10    9.50
  -6  -6   1   28.80   12.60
  -6  -6   1   32.00   11.00
  -6  -6   1   26.10    9.00
  -6  -6   1   21.60   11.50
   5   6  -1  455.05   37.20
   5   6  -1  421.36   29.10
   5   6  -1  436.96   34.70
   5   6  -1  464.25   28.80
  -5  -6   1  383.06   28.20
  -5  -6   1  381.36   30.00
  -5  -6   1  412.56   30.90
  -5  -6   1  403.16   29.70
   4   6  -1    8.80   14.00
   4   6  -1   18.60   22.00
   4   6  -1   12.30    7.80
   4   6  -1   16.90   11.80
   4   6  -1    2.20    9.50
   4   6  -1   10.40    9.80
  -4  -6   1   22.10   11.60
  -4  -6   1   42.80   15.60
  -4  -6   1   18.40   11.20
  -4  -6   1   11.00   13.20
  -4  -6   1   15.80   11.20
  -4  -6   1   22.20   10.40
   3   6  -1 1416.16   72.59
   3   6  -1 1537.25   70.19
   3   6  -1 1521.25   73.09
   3   6  -1 1475.25   70.39
   3   6  -1 1527.25   75.49
  -3  -6   1 1448.56   70.29
  -3  -6   1 1470.45   69.89
  -3  -6   1 1518.35   72.49
  -3  -6   1 1494.15   72.29
  -3  -6   1 1464.75   73.69
   2   6  -1  288.47   25.50
   2   6  -1  302.87   21.20
   2   6  -1  306.87   28.70
   2   6  -1  341.77   26.40
   2   6  -1  330.07   21.60
  -2  -6   1  339.07   30.50
  -2  -6   1  318.07   23.40
  -2  -6   1  311.87   24.50
   1   6  -1  190.28   16.90
   1   6  -1  181.48   20.70
   1   6  -1  159.88   21.80
   1   6  -1  198.28   16.30
   1   6  -1  168.58   28.80
  -1  -6   1  167.88   19.30
  -1  -6   1  182.38   24.00
  -1  -6   1  168.68   24.10
  -1  -6   1  185.08   19.00
   0   6  -1  939.01   46.10
   0   6  -1  908.61   46.10
   0   6  -1  935.31   52.79
   0   6  -1  866.71   51.79
   0  -6   1  957.90   47.40
   0  -6   1  833.92   51.69
   0  -6   1  930.31   50.59
   0  -6   1  908.31   53.89
   0  -6   1  917.21   50.69
  -1   6  -1   40.90    9.40
  -1   6  -1   57.29   10.90
   1  -6   1   28.70   11.00
   1  -6   1   45.30   27.10
   1  -6   1   44.20   11.20
   1  -6   1   38.20   14.90
   1  -6   1   28.20   11.10
  -2   6  -1   20.90    8.70
  -2   6  -1   28.00    8.80
   2  -6   1   29.20   10.00
   2  -6   1   25.10   10.70
   2  -6   1   13.40    8.40
  -3   6  -1   11.80    7.70
   3  -6   1   14.80    6.70
   3  -6   1   10.40    7.10
   3  -6   1   11.30    9.90
   7   5  -1  123.49   14.80
  -7  -5   1  131.39   13.20
  -7  -5   1  109.99   17.10
  -7  -5   1  100.19   19.20
   6   5  -1  175.08   20.30
   6   5  -1  198.18   27.30
  -6  -5   1  135.39   17.10
  -6  -5   1  138.59   20.20
  -6  -5   1  129.09   19.50
  -6  -5   1  135.19   19.30
   5   5  -1 1162.98   62.49
   5   5  -1 1137.69   58.09
   5   5  -1 1068.39   62.39
  -5  -5   1 1223.08   60.49
  -5  -5   1 1213.38   59.39
  -5  -5   1 1057.29   61.49
  -5  -5   1 1139.59   57.29
   4   5  -1  112.29   17.00
   4   5  -1   92.09   20.70
   4   5  -1  129.49   16.90
   4   5  -1  112.69   19.00
   4   5  -1   90.59   16.40
   4   5  -1  102.39   16.50
   4   5  -1   72.69   13.20
   4   5  -1   90.19   14.60
  -4  -5   1   95.79   14.40
  -4  -5   1   92.49   14.70
  -4  -5   1  126.49   16.60
  -4  -5   1  118.89   21.10
  -4  -5   1   95.29   16.70
   3   5  -1  276.47   19.60
   3   5  -1  285.07   22.50
   3   5  -1  264.77   25.10
   3   5  -1  306.27   19.80
   3   5  -1  244.28   20.50
  -3  -5   1  245.68   21.20
  -3  -5   1  267.27   24.70
  -3  -5   1  279.77   19.50
  -3  -5   1  270.97   22.90
   2   5  -1 1214.98   58.99
   2   5  -1 1110.09   56.39
   2   5  -1 1179.48   55.19
   2   5  -1 1238.88   55.49
  -2  -5   1 1147.89   54.89
  -2  -5   1 1224.58   57.29
  -2  -5   1 1176.48   56.79
  -2  -5   1 1160.58   56.19
   1   5  -1  157.38   15.10
   1   5  -1  160.38   15.60
   1   5  -1  133.69   12.50
   1   5  -1  137.69   14.50
  -1  -5   1  135.99   15.10
   0   5  -1   65.49   11.90
   0   5  -1   75.79   10.90
   0   5  -1   74.79   10.80
   0   5  -1   80.09   13.20
   0  -5   1   88.99   19.60
   0  -5   1   84.99   15.80
   0  -5   1   86.89   13.70
   0  -5   1   95.99   16.20
   0  -5   1   70.09   14.50
   0  -5   1  124.19   20.20
   0  -5   1   84.49   13.40
  -1   5  -1   47.60   15.60
  -1   5  -1   46.20   12.40
  -1   5  -1   60.49    9.30
  -1   5  -1   35.80   10.10
   1  -5   1   56.79   14.70
   1  -5   1   37.10   12.10
   1  -5   1   24.90   12.70
   1  -5   1   37.00   13.20
   1  -5   1   32.70   11.20
   1  -5   1   47.80   14.40
  -2   5  -1  223.68   17.70
  -2   5  -1  170.98   19.00
   2  -5   1  202.08   22.50
   2  -5   1  193.98   22.10
   2  -5   1  179.18   27.60
   2  -5   1  169.08   21.50
   2  -5   1  202.38   23.20
  -3   5  -1    8.90    8.50
  -3   5  -1   10.80    8.30
   3  -5   1   -2.30    8.50
   3  -5   1   15.10    9.30
   3  -5   1   -8.90    8.40
   3  -5   1    6.80    9.00
  -4   5  -1   60.39    9.20
   4  -5   1   89.09   11.40
   4  -5   1   53.99    9.50
   4  -5   1   67.29   11.80
   7   4  -1  138.39   16.70
  -7  -4   1  121.19   22.50
  -7  -4   1  134.39   18.50
  -7  -4   1  142.59   14.30
   6   4  -1  550.84   36.30
   6   4  -1  516.25   34.20
   6   4  -1  539.35   39.20
  -6  -4   1  546.65   35.60
  -6  -4   1  533.95   32.60
  -6  -4   1  503.65   30.20
  -6  -4   1  582.44   35.90
  -6  -4   1  514.85   43.20
   5   4  -1  306.97   28.70
   5   4  -1  344.87   28.10
   5   4  -1  320.77   31.70
  -5  -4   1  386.76   27.80
  -5  -4   1  392.46   35.80
  -5  -4   1  432.76   28.60
  -5  -4   1  410.26   27.00
  -5  -4   1  369.76   27.40
  -5  -4   1  435.06   39.20
  -5  -4   1  394.26   24.50
   4   4  -1  433.26   29.70
   4   4  -1  437.86   26.70
   4   4  -1  450.85   43.50
   4   4  -1  438.16   28.90
   4   4  -1  401.66   26.90
   4   4  -1  413.66   28.10
   4   4  -1  473.65   26.90
   4   4  -1  461.55   27.50
  -4  -4   1  443.96   35.00
  -4  -4   1  449.46   29.80
  -4  -4   1  403.86   25.60
  -4  -4   1  438.36   27.40
  -4  -4   1  442.16   26.80
  -4  -4   1  428.06   29.30
  -4  -4   1  448.56   28.30
   3   4  -1  223.58   28.30
   3   4  -1  207.18   15.50
   3   4  -1  196.08   16.80
   3   4  -1  176.28   15.20
   3   4  -1  195.78   15.60
  -3  -4   1  197.18   16.60
  -3  -4   1  191.88   15.10
  -3  -4   1  224.38   17.30
   2   4  -1  383.46   22.40
   2   4  -1  422.46   22.50
   2   4  -1  408.16   21.80
   2   4  -1  424.56   24.40
  -2  -4   1  393.56   21.90
  -2  -4   1  382.46   22.60
  -2  -4   1  375.66   23.50
   1   4  -1  812.02   39.60
   1   4  -1  796.72   38.30
   1   4  -1  802.12   41.30
  -1  -4   1  865.61   41.10
  -1  -4   1  802.72   38.00
  -1  -4   1  833.92   43.10
  -1  -4   1  855.41   39.70
   0   4  -1  277.37   17.20
   0   4  -1  297.37   18.40
   0   4  -1  276.97   16.30
   0  -4   1  275.27   17.20
   0  -4   1  276.67   18.90
  -1   4  -1  256.07   19.20
  -1   4  -1  236.08   18.60
  -1   4  -1  195.28   20.60
  -1   4  -1  224.38   15.40
  -1   4  -1  211.48   20.90
   1  -4   1  252.67   19.00
  -2   4  -1   -4.60   10.20
  -2   4  -1    8.70   11.30
  -2   4  -1   -3.60   10.20
  -2   4  -1   -6.60    9.10
  -2   4  -1   -1.90    6.20
   2  -4   1    9.70   10.70
   2  -4   1    4.00   10.30
   2  -4   1  -21.90   15.20
   2  -4   1   11.20   10.90
   2  -4   1   10.60   12.10
   2  -4   1    1.70   10.90
  -3   4  -1   71.19   19.30
  -3   4  -1   58.19   22.00
  -3   4  -1   74.09   11.50
  -3   4  -1   76.69   13.40
  -3   4  -1   49.10   14.30
   3  -4   1   51.29   17.70
   3  -4   1   61.19   14.00
   3  -4   1   74.99   14.60
   3  -4   1   62.69   12.70
  -4   4  -1  119.49   15.50
  -4   4  -1  129.29   20.30
  -4   4  -1  107.09   15.30
   4  -4   1  105.89   15.50
   4  -4   1  118.09   17.30
   4  -4   1  104.59   17.20
   4  -4   1  110.99   16.10
   7   3  -1  138.69   16.10
  -7  -3   1  169.88   28.30
  -7  -3   1  146.99   19.00
  -7  -3   1  147.89   24.30
  -7  -3   1  177.88   15.50
  -7  -3   1  155.18   15.10
   6   3  -1  352.96   29.20
  -6  -3   1  401.76   27.20
  -6  -3   1  375.56   23.80
  -6  -3   1  408.96   29.90
  -6  -3   1  374.26   29.40
  -6  -3   1  376.56   27.00
  -6  -3   1  256.47   46.70
   5   3  -1  258.77   23.80
   5   3  -1  228.28   34.50
   5   3  -1  288.77   25.70
   5   3  -1  268.37   26.50
  -5  -3   1  232.28   22.00
  -5  -3   1  237.68   18.40
  -5  -3   1  254.57   22.80
  -5  -3   1  220.88   19.70
  -5  -3   1  247.78   21.00
  -5  -3   1  201.98   26.00
  -5  -3   1  255.67   40.30
   4   3  -1  215.88   18.40
   4   3  -1  183.28   20.10
   4   3  -1  169.78   22.30
  -4  -3   1  237.68   16.70
  -4  -3   1  214.08   16.40
  -4  -3   1  209.58   17.80
  -4  -3   1  200.48   18.10
  -4  -3   1  186.88   15.70
   3   3  -1  289.57   18.40
   3   3  -1  270.67   19.40
   3   3  -1  273.87   23.40
   3   3  -1  297.37   18.20
  -3  -3   1  318.57   19.60
  -3  -3   1  313.47   20.00
  -3  -3   1  321.67   18.40
  -3  -3   1  322.77   18.60
   2   3  -1  466.65   27.30
   2   3  -1  461.75   23.50
   2   3  -1  502.35   25.60
   2   3  -1  487.15   23.70
  -2  -3   1  447.16   24.00
  -2  -3   1  446.26   24.50
  -2  -3   1  457.35   23.70
   1   3  -1 1966.40   85.29
   1   3  -1 1895.81   83.09
   1   3  -1 1977.90   83.89
   1   3  -1 1838.12   82.19
  -1  -3   1 1964.20   83.59
  -1  -3   1 1924.81   83.19
  -1  -3   1 1870.01   85.69
  -1  -3   1 1994.10   84.99
   0   3  -1 1583.84   72.59
   0   3  -1 1734.43   73.79
   0   3  -1 1576.84   71.19
   0  -3   1 1692.13   73.69
   0  -3   1 1679.13   72.89
   0  -3   1 1769.72   74.69
  -1   3  -1  400.26   20.30
  -1   3  -1  440.36   23.40
  -1   3  -1  443.76   22.70
   1  -3   1  386.66   21.00
   1  -3   1  377.86   23.10
  -2   3  -1 1234.08   58.69
  -2   3  -1 1222.48   58.09
  -2   3  -1 1129.59   53.89
   2  -3   1 1216.28   58.79
  -3   3  -1  391.06   23.60
  -3   3  -1  343.37   25.10
  -3   3  -1  381.96   29.50
  -3   3  -1  382.76   29.80
   3  -3   1  407.96   31.90
   3  -3   1  428.86   30.20
   3  -3   1  399.06   29.00
   3  -3   1  434.16   30.70
   3  -3   1  441.16   30.80
   3  -3   1  388.16   32.30
  -4   3  -1  516.05   29.80
  -4   3  -1  519.55   30.00
  -4   3  -1  488.65   34.20
   4  -3   1  465.55   33.70
   4  -3   1  488.95   33.90
   4  -3   1  530.75   33.90
   4  -3   1  515.95   34.50
  -5   3  -1  314.67   20.20
  -5   3  -1  292.67   21.10
  -5   3  -1  245.88   25.50
   5  -3   1  274.57   20.70
   5  -3   1  277.37   21.50
   5  -3   1  277.17   22.10
   7   2  -1   55.79    9.90
   7   2  -1   59.29    9.30
  -7  -2   1   92.59   14.40
  -7  -2   1   84.69   13.40
   6   2  -1  144.89   19.50
   6   2  -1  123.39   19.60
  -6  -2   1  135.39   17.30
  -6  -2   1  122.19   19.00
  -6  -2   1  128.39   14.90
  -6  -2   1  133.89   18.10
  -6  -2   1  130.69   19.00
   5   2  -1  349.57   35.30
   5   2  -1  357.66   36.60
   5   2  -1  346.87   27.50
   5   2  -1  397.06   30.40
   5   2  -1  349.27   28.20
  -5  -2   1  372.56   27.20
  -5  -2   1  379.96   26.20
  -5  -2   1  335.27   31.20
  -5  -2   1  388.06   27.50
  -5  -2   1  378.76   23.70
  -5  -2   1  361.36   23.10
  -5  -2   1  348.47   27.50
   4   2  -1  135.09   15.20
  -4  -2   1  182.18   16.40
  -4  -2   1  167.18   14.40
  -4  -2   1  158.98   16.10
  -4  -2   1  173.38   13.70
  -4  -2   1  165.08   13.90
   3   2  -1  352.06   17.90
   3   2  -1  376.66   21.30
   3   2  -1  365.96   18.40
  -3  -2   1  310.67   18.60
  -3  -2   1  302.37   20.00
  -3  -2   1  321.17   19.10
  -3  -2   1  318.37   19.70
   2   2  -1 1837.62   83.19
   2   2  -1 1916.11   80.99
   2   2  -1 1915.11   82.59
  -2  -2   1 1891.41   81.79
  -2  -2   1 1873.71   81.29
  -2  -2   1 1771.52   82.89
   1   2  -1 3586.34  147.69
   1   2  -1 3488.15  145.89
   1   2  -1 3302.87  146.89
   1   2  -1 3354.86  144.79
  -1  -2   1 3581.54  146.29
  -1  -2   1 3403.76  145.89
   0   2  -1   29.30    4.10
   0   2  -1   24.60    3.40
   0   2  -1   24.30    3.20
   0  -2   1   18.90    4.10
   0  -2   1   21.90    3.90
   0  -2   1   21.20    4.00
  -1   2  -1  505.05   25.00
   1  -2   1  532.35   25.90
   1  -2   1  508.45   24.40
  -2   2  -1  435.76   23.00
  -2   2  -1  508.85   26.30
   2  -2   1  512.25   26.70
  -3   2  -1   51.79    7.70
  -3   2  -1   68.89   12.70
  -3   2  -1   41.00   10.00
   3  -2   1   82.89   14.70
   3  -2   1   65.09   14.50
   3  -2   1   75.89   12.60
  -4   2  -1  162.38   15.00
  -4   2  -1  125.19   21.70
  -4   2  -1  139.79   16.70
   4  -2   1  130.79   19.90
   4  -2   1  163.98   21.90
   4  -2   1  121.19   19.50
   4  -2   1  138.49   21.40
   4  -2   1  149.49   20.80
   4  -2   1  146.29   20.40
  -5   2  -1  609.74   34.40
  -5   2  -1  676.83   35.60
   5  -2   1  662.63   38.20
   5  -2   1  651.03   38.80
   5  -2   1  638.34   39.20
  -6   2  -1   88.89   11.60
   6  -2   1   48.80    9.40
   6  -2   1   65.09   11.60
   6  -2   1   93.79   12.80
   7   1  -1    4.60    7.20
  -7  -1   1    9.60    6.40
  -7  -1   1   22.70    8.00
  -7  -1   1    5.90   14.20
   6   1  -1   47.90   15.00
   6   1  -1   35.10   10.60
   6   1  -1   32.80   10.60
  -6  -1   1   30.20    7.70
  -6  -1   1   21.20   10.20
  -6  -1   1   34.30    9.80
   5   1  -1  281.87   25.10
   5   1  -1  200.78   34.00
   5   1  -1  259.77   24.80
   5   1  -1  251.57   29.70
  -5  -1   1  199.98   32.00
  -5  -1   1  225.48   25.30
  -5  -1   1  293.07   19.80
  -5  -1   1  293.57   25.00
  -5  -1   1  304.17   20.20
  -5  -1   1  273.97   24.10
  -5  -1   1  268.87   25.00
   4   1  -1  438.36   25.40
   4   1  -1  445.46   27.20
  -4  -1   1  394.96   25.40
  -4  -1   1  364.56   22.50
  -4  -1   1  375.76   25.30
  -4  -1   1  398.56   23.20
  -4  -1   1  386.26   23.80
   3   1  -1 1006.20   42.80
   3   1  -1  995.80   43.60
   3   1  -1 1079.19   48.00
  -3  -1   1  909.41   44.50
  -3  -1   1  927.81   45.80
  -3  -1   1  898.81   46.10
  -3  -1   1 1011.30   45.60
   2   1  -1 2414.06  103.99
   2   1  -1 2393.46  106.09
   2   1  -1 2361.06  104.19
  -2  -1   1 2537.05  105.49
  -2  -1   1 2552.14  105.09
   1   1  -1 6168.88  256.87
   1   1  -1 6120.39  258.07
   1   1  -1 5727.23  257.47
  -1  -1   1 6478.05  257.87
  -1  -1   1 6219.48  257.47
   0   1  -1   15.20    1.60
   0   1  -1   10.90    1.90
   0  -1   1   12.30    2.20
   0  -1   1    8.30    2.00
  -1   1  -1   17.20    2.40
  -1   1  -1   15.80    2.90
   1  -1   1   23.30    3.90
   1  -1   1   25.70    3.90
  -2   1  -1 3137.19  135.09
  -2   1  -1 3110.49  135.39
  -2   1  -1 3058.99  135.49
   2  -1   1 3505.95  137.99
  -3   1  -1 2090.99   86.99
  -3   1  -1 2097.09   90.09
  -3   1  -1 1974.10   86.39
  -3   1  -1 1838.22   86.09
   3  -1   1 1909.31   89.29
  -4   1  -1  635.14   34.70
  -4   1  -1  648.94   39.50
   4  -1   1  695.03   39.60
   4  -1   1  724.73   41.40
   4  -1   1  681.93   38.10
   4  -1   1  695.43   42.40
   4  -1   1  736.33   41.90
   4  -1   1  698.13   40.70
  -5   1  -1  333.57   32.20
  -5   1  -1  445.96   26.60
  -5   1  -1  436.36   36.10
  -5   1  -1  425.56   26.10
   5  -1   1  359.86   30.80
   5  -1   1  435.16   31.10
   5  -1   1  391.66   33.80
   5  -1   1  401.36   29.50
  -6   1  -1    5.80    6.10
  -6   1  -1   -0.30    9.70
  -6   1  -1    9.10   12.70
  -6   1  -1   -4.70    7.70
   6  -1   1   18.30    9.90
   6  -1   1   15.80    9.00
   6  -1   1    4.30    8.10
   6   0  -1   43.70    9.30
   6   0  -1   32.70   14.30
   6   0  -1   58.89   14.40
   6   0  -1   28.60   10.40
  -6   0   1   37.60    9.90
  -6   0   1   41.70    8.30
  -6   0   1   53.29   12.30
   5   0  -1   89.99   16.90
   5   0  -1  103.39   15.00
   5   0  -1   82.39   15.60
   5   0  -1   86.59   16.30
  -5   0   1   88.69   14.70
  -5   0   1   79.69   13.30
  -5   0   1   92.39   13.80
  -5   0   1   72.89   14.80
   4   0  -1  611.94   36.90
   4   0  -1  693.03   35.80
   4   0  -1  670.43   37.00
  -4   0   1  606.94   31.70
  -4   0   1  619.34   34.70
  -4   0   1  540.95   34.70
  -4   0   1  598.04   34.80
  -4   0   1  596.04   31.90
  -4   0   1  559.74   32.40
   3   0  -1 2513.75  109.19
   3   0  -1 2648.73  112.79
  -3   0   1 2697.73  111.19
  -3   0   1 2389.76  111.19
  -3   0   1 2468.25  110.19
  -3   0   1 2596.34  110.29
   2   0  -1 2398.56  100.99
   2   0  -1 2455.35   98.09
   2   0  -1 2400.46   98.49
  -2   0   1 2226.38   98.99
  -2   0   1 2211.98   98.79
  -2   0   1 2180.98   98.19
   1   0  -1  182.78   11.30
   1   0  -1  187.58    9.30
   1   0  -1  184.58    9.60
   1   0  -1  195.98    9.20
   0   0  -1 2057.49   90.89
   0   0   1 2308.57   91.19
  -1   0  -1  920.71   38.00
  -1   0  -1  896.91   39.20
   1   0   1  891.21   39.20
   1   0   1  945.11   39.70
   1   0   1  914.51   39.20
   1   0   1  863.11   39.20
  -2   0  -1 1221.88   50.99
  -2   0  -1 1203.58   51.19
   2   0   1 1111.89   51.29
   2   0   1 1077.59   51.89
  -3   0  -1 1835.52   76.69
  -3   0  -1 1756.12   75.19
  -3   0  -1 1704.83   75.79
  -3   0  -1 1633.24   76.89
   3   0   1 1656.23   77.09
  -4   0  -1  435.76   23.60
  -4   0  -1  423.16   27.30
  -4   0  -1  387.86   24.50
  -4   0  -1  408.66   24.40
  -4   0  -1  357.16   26.50
   4   0   1  450.95   26.70
   4   0   1  456.45   30.80
  -5   0  -1   45.70   13.60
  -5   0  -1   29.30    8.20
  -5   0  -1   27.50   14.10
  -5   0  -1   40.20    9.10
   5   0   1   34.20   11.30
   5   0   1   25.40    9.50
   5   0   1   38.20   12.70
   5   0   1   37.10   14.50
   5   0   1   52.09   14.60
   5   0   1   41.20   13.00
  -6   0  -1    3.90    7.90
  -6   0  -1  -14.60   10.80
  -6   0  -1    9.50    6.90
   6   0   1   -0.70   11.00
   6   0   1   -6.30   10.60
   6   0   1    8.00    9.30
   6   0   1  -13.80    7.80
  -7   0  -1    0.70    5.80
  -7   0  -1   12.50    9.70
   7   0   1    8.90    6.80
   6  -1  -1   21.10   10.20
   6  -1  -1   26.50   11.80
   6  -1  -1   31.40    9.00
  -6   1   1   20.90    9.20
  -6   1   1   19.80    6.90
  -6   1   1   25.70   10.30
  -6   1   1   35.80   12.00
   5  -1  -1  467.85   32.00
   5  -1  -1  443.36   32.10
   5  -1  -1  402.66   28.30
   5  -1  -1  459.65   33.50
   5  -1  -1  412.66   36.00
  -5   1   1  505.15   39.30
  -5   1   1  487.45   27.80
  -5   1   1  481.45   28.40
  -5   1   1  430.16   33.00
   4  -1  -1  493.45   31.40
   4  -1  -1  460.65   31.90
   4  -1  -1  460.45   30.20
   4  -1  -1  456.75   30.10
   4  -1  -1  445.86   32.90
  -4   1   1  384.76   33.70
  -4   1   1  419.56   25.20
  -4   1   1  388.76   25.50
  -4   1   1  422.16   29.50
   3  -1  -1 3497.55  149.79
   3  -1  -1 3407.46  146.29
  -3   1   1 3552.14  149.69
  -3   1   1 3250.57  146.39
  -3   1   1 3270.87  145.49
  -3   1   1 3516.85  146.59
   2  -1  -1 2089.39   92.49
   2  -1  -1 2340.37   93.09
   2  -1  -1 2284.97   95.09
   2  -1  -1 2270.87   93.59
  -2   1   1 2099.09   94.39
  -2   1   1 2056.39   92.09
  -2   1   1 2011.40   92.59
   1  -1  -1  496.75   21.90
   1  -1  -1  510.45   23.30
   1  -1  -1  527.05   23.90
   1  -1  -1  515.05   23.50
  -1   1   1  490.05   23.40
  -1   1   1  490.35   21.80
  -1   1   1  492.45   23.60
   0  -1  -1 1577.54   66.89
   0  -1  -1 1535.95   66.49
   0  -1  -1 1688.43   66.99
   0  -1  -1 1549.94   65.79
   0   1   1 1578.24   66.69
   0   1   1 1461.05   66.59
   0   1   1 1615.24   67.89
   0   1   1 1541.05   66.99
  -1  -1  -1  872.61   38.70
   1   1   1  855.31   38.80
   1   1   1  853.31   38.10
   1   1   1  898.11   39.20
   1   1   1  917.41   38.60
   1   1   1  907.31   38.50
  -2  -1  -1 3333.87  129.49
  -2  -1  -1 3173.48  128.89
   2   1   1 3044.20  128.89
   2   1   1 2946.41  126.59
   2   1   1 2895.21  126.59
   2   1   1 2906.01  126.59
   2   1   1 2876.01  129.29
   2   1   1 3008.70  129.49
  -3  -1  -1  401.56   22.10
  -3  -1  -1  394.36   23.00
  -3  -1  -1  396.66   21.50
  -3  -1  -1  392.76   20.80
   3   1   1  420.36   23.10
  -4  -1  -1  328.17   18.80
  -4  -1  -1  310.17   19.50
  -4  -1  -1  302.57   19.60
  -4  -1  -1  312.47   21.20
  -4  -1  -1  303.07   21.60
   4   1   1  264.57   19.90
   4   1   1  257.37   20.70
  -5  -1  -1   26.20   12.80
  -5  -1  -1   35.10   11.50
  -5  -1  -1   27.70    8.00
  -5  -1  -1   21.00   11.70
  -5  -1  -1   23.10    7.60
  -5  -1  -1   16.80   16.60
   5   1   1   19.30   11.20
   5   1   1   41.90   12.50
   5   1   1   28.80   15.90
   5   1   1   10.40   14.10
   5   1   1   26.30   10.30
  -6  -1  -1   14.20    8.30
  -6  -1  -1   29.60    8.30
  -6  -1  -1   28.80   11.40
   6   1   1    7.80   11.00
   6   1   1   47.40   12.70
   6   1   1   15.90   14.20
   6   1   1   32.40    9.90
  -7  -1  -1  294.57   21.50
  -7  -1  -1  291.07   18.60
  -7  -1  -1  316.87   21.40
   7   1   1  270.17   20.10
   7   1   1  242.58   22.40
   6  -2  -1   38.50    7.90
   6  -2  -1   34.00   11.00
  -6   2   1   37.00    7.30
  -6   2   1   26.70   12.40
   5  -2  -1  116.29   20.50
   5  -2  -1  166.98   19.40
   5  -2  -1  137.29   18.60
  -5   2   1  176.48   16.30
  -5   2   1  181.18   17.20
  -5   2   1  183.58   23.40
  -5   2   1  173.08   20.60
   4  -2  -1  544.45   35.00
   4  -2  -1  557.74   37.10
   4  -2  -1  489.95   37.10
   4  -2  -1  521.15   31.30
   4  -2  -1  519.35   36.80
   4  -2  -1  574.94   35.80
  -4   2   1  539.45   30.00
  -4   2   1  505.65   36.50
  -4   2   1  468.65   37.70
  -4   2   1  529.75   30.00
   3  -2  -1  595.24   37.80
   3  -2  -1  552.64   33.40
   3  -2  -1  550.04   35.80
   3  -2  -1  577.34   35.50
  -3   2   1  599.34   33.60
  -3   2   1  623.04   30.20
  -3   2   1  535.35   30.50
   2  -2  -1 1632.74   72.89
   2  -2  -1 1588.24   73.99
  -2   2   1 1642.44   73.99
  -2   2   1 1645.24   71.39
   1  -2  -1 2624.24  114.39
   1  -2  -1 2755.72  114.79
  -1   2   1 2576.84  114.29
   0  -2  -1 1274.97   58.39
   0  -2  -1 1341.37   58.09
   0  -2  -1 1253.67   55.79
   0  -2  -1 1322.07   55.39
   0  -2  -1 1368.36   57.69
   0   2   1 1291.37   57.29
   0   2   1 1366.66   57.89
  -1  -2  -1 3040.30  137.09
  -1  -2  -1 3139.29  137.39
   1   2   1 3400.46  137.89
   1   2   1 3321.67  137.29
   1   2   1 3324.77  139.09
   1   2   1 3261.77  138.29
  -2  -2  -1 4193.28  175.28
  -2  -2  -1 4167.58  174.68
   2   2   1 4225.08  176.58
   2   2   1 3880.71  175.28
   2   2   1 4123.19  174.78
  -3  -2  -1   54.69    9.90
  -3  -2  -1   43.40    7.70
  -3  -2  -1   51.39    7.60
  -3  -2  -1   46.00    7.50
   3   2   1   35.70    6.30
   3   2   1   42.90    7.60
   3   2   1   33.50    5.50
   3   2   1   39.80    5.60
   3   2   1   35.40    7.10
   3   2   1   39.40    5.20
  -4  -2  -1  787.62   40.20
  -4  -2  -1  831.72   43.20
  -4  -2  -1  848.22   43.30
  -4  -2  -1  836.52   40.40
  -4  -2  -1  847.92   41.60
   4   2   1  821.22   43.60
  -5  -2  -1   71.09   12.30
  -5  -2  -1   78.39   12.10
  -5  -2  -1   55.59    9.50
  -5  -2  -1   41.70   13.10
  -5  -2  -1   64.59   11.40
  -5  -2  -1   51.09   12.80
   5   2   1   49.80   13.30
   5   2   1   82.69   14.30
   5   2   1   89.99   16.50
   5   2   1   63.59   13.70
  -6  -2  -1  280.97   35.20
  -6  -2  -1  236.18   18.70
  -6  -2  -1  236.68   20.20
  -6  -2  -1  248.28   26.80
  -6  -2  -1  250.67   27.50
  -6  -2  -1  239.08   23.10
   6   2   1  228.38   22.70
   6   2   1  218.38   25.60
   6   2   1  273.27   38.80
  -7  -2  -1  390.76   24.00
  -7  -2  -1  385.66   21.80
  -7  -2  -1  343.77   24.60
   7   2   1  296.77   27.90
   7   2   1  332.87   21.80
   7   2   1  320.77   24.00
   5  -3  -1   54.49   10.50
   5  -3  -1   31.80    9.20
   5  -3  -1   39.00    9.10
  -5   3   1   25.80   12.90
  -5   3   1   35.90    8.10
  -5   3   1   31.40   14.60
  -5   3   1   36.40    9.80
   4  -3  -1  384.36   28.00
   4  -3  -1  336.67   28.60
   4  -3  -1  346.87   30.30
   4  -3  -1  376.26   28.60
  -4   3   1  367.36   24.60
  -4   3   1  399.06   28.70
  -4   3   1  382.36   24.70
   3  -3  -1  150.28   21.80
   3  -3  -1  147.89   24.20
   3  -3  -1  153.48   20.30
   3  -3  -1  176.38   22.30
   3  -3  -1  126.39   18.80
   3  -3  -1  186.88   21.30
  -3   3   1  151.78   15.80
  -3   3   1  180.68   15.20
  -3   3   1  166.78   20.50
  -3   3   1  171.98   18.90
  -3   3   1  174.78   21.20
   2  -3  -1   78.89   12.60
  -2   3   1  106.29   13.30
  -2   3   1  100.79   10.30
  -2   3   1  107.89   13.10
  -2   3   1   88.49   13.20
   1  -3  -1 1177.78   55.19
  -1   3   1 1247.18   55.59
  -1   3   1 1150.28   54.59
  -1   3   1 1165.48   52.59
  -1   3   1 1138.59   54.29
   0  -3  -1  163.58   11.30
   0  -3  -1  150.38    8.90
   0   3   1  155.78   10.80
   0   3   1  162.58   10.70
   0   3   1  159.58   11.10
  -1  -3  -1 1594.94   62.79
  -1  -3  -1 1501.35   63.69
  -1  -3  -1 1455.15   62.29
   1   3   1 1354.86   65.59
   1   3   1 1352.96   62.69
   1   3   1 1325.17   62.59
   1   3   1 1442.46   63.59
  -2  -3  -1 3726.53  157.38
  -2  -3  -1 3560.54  158.18
  -2  -3  -1 3555.54  157.78
   2   3   1 3876.21  157.28
   2   3   1 3617.74  156.98
   2   3   1 3885.51  158.18
   2   3   1 3629.44  158.78
   2   3   1 3666.23  160.38
  -3  -3  -1 1562.44   69.69
  -3  -3  -1 1522.95   68.59
  -3  -3  -1 1542.55   70.89
  -3  -3  -1 1617.04   70.89
   3   3   1 1514.45   72.59
   3   3   1 1430.56   68.69
   3   3   1 1595.74   70.19
   3   3   1 1559.84   71.39
  -4  -3  -1  337.77   20.70
  -4  -3  -1  315.77   23.00
  -4  -3  -1  345.07   21.50
  -4  -3  -1  315.37   23.00
  -4  -3  -1  344.17   20.90
   4   3   1  364.06   26.00
   4   3   1  368.56   22.90
   4   3   1  348.27   24.00
  -5  -3  -1  281.67   22.90
  -5  -3  -1  272.97   26.40
  -5  -3  -1  302.17   19.70
  -5  -3  -1  291.77   21.90
  -5  -3  -1  245.38   24.20
  -5  -3  -1  298.67   20.40
   5   3   1  215.98   29.30
   5   3   1  257.67   28.50
   5   3   1  279.77   26.70
   5   3   1  285.17   24.70
  -6  -3  -1  384.46   25.60
  -6  -3  -1  361.36   28.60
  -6  -3  -1  421.56   29.60
  -6  -3  -1  333.87   26.50
  -6  -3  -1  375.16   23.30
  -6  -3  -1  302.77   33.70
   6   3   1  382.16   28.50
   6   3   1  304.37   35.60
   6   3   1  347.67   31.30
  -7  -3  -1  268.97   19.10
  -7  -3  -1  236.48   28.70
  -7  -3  -1  249.68   23.00
  -7  -3  -1  284.47   20.90
   7   3   1  297.77   23.10
   7   3   1  291.07   26.20
   7   3   1  298.47   21.00
   4  -4  -1    2.40    9.30
   4  -4  -1    6.70    7.50
   4  -4  -1   -3.50    8.20
   4  -4  -1    6.40    8.10
  -4   4   1   20.50    8.50
  -4   4   1   18.40   14.60
   3  -4  -1   97.09   14.80
   3  -4  -1   72.89   15.20
   3  -4  -1   39.60   14.50
   3  -4  -1   59.69   12.30
   3  -4  -1   66.69   14.70
  -3   4   1   69.99   14.90
  -3   4   1   54.09   18.80
  -3   4   1   49.20   10.40
  -3   4   1   88.39   22.50
  -3   4   1   54.89   10.00
   2  -4  -1  398.26   28.50
   2  -4  -1  377.36   31.00
   2  -4  -1  370.16   29.60
   2  -4  -1  407.96   29.30
   2  -4  -1  328.97   25.60
   2  -4  -1  383.46   29.10
  -2   4   1  409.36   29.60
  -2   4   1  386.06   27.20
  -2   4   1  387.16   22.90
  -2   4   1  345.97   28.70
  -2   4   1  337.57   23.90
   1  -4  -1  107.99   14.20
   1  -4  -1  109.19   24.50
  -1   4   1  112.89   13.90
  -1   4   1  111.39   14.40
  -1   4   1   95.49   14.70
  -1   4   1  100.59   15.50
  -1   4   1  116.19   11.20
   0  -4  -1  130.49   12.80
   0   4   1  118.29   10.80
   0   4   1  113.99   14.50
   0   4   1  115.79   11.80
   0   4   1  133.39   14.70
   0   4   1  133.69   12.00
  -1  -4  -1 1407.36   61.39
  -1  -4  -1 1337.27   60.49
  -1  -4  -1 1444.06   63.49
  -1  -4  -1 1412.86   60.79
   1   4   1 1351.16   61.89
   1   4   1 1327.77   61.69
   1   4   1 1375.46   63.19
  -2  -4  -1  883.91   42.20
  -2  -4  -1  855.91   42.70
  -2  -4  -1  852.91   43.40
   2   4   1  950.20   45.00
   2   4   1  894.01   49.40
   2   4   1  880.61   42.20
   2   4   1  905.31   42.00
   2   4   1  901.51   42.70
   2   4   1  970.20   43.70
  -3  -4  -1 1964.90   84.09
  -3  -4  -1 1785.12   82.59
  -3  -4  -1 1959.40   85.39
  -3  -4  -1 1886.71   85.19
   3   4   1 1707.03   88.29
   3   4   1 1922.51   84.89
   3   4   1 1872.01   86.39
   3   4   1 1829.72   83.09
   3   4   1 1865.11   83.39
  -4  -4  -1  316.87   21.80
  -4  -4  -1  327.67   24.40
  -4  -4  -1  313.17   25.10
  -4  -4  -1  299.57   20.90
  -4  -4  -1  354.06   22.30
  -4  -4  -1  335.57   23.60
   4   4   1  298.27   25.20
   4   4   1  333.57   22.70
   4   4   1  329.37   23.70
   4   4   1  291.97   24.30
   4   4   1  310.27   22.70
   4   4   1  330.67   29.10
  -5  -4  -1  362.56   25.00
  -5  -4  -1  400.16   25.90
  -5  -4  -1  284.47   38.30
  -5  -4  -1  370.56   26.90
  -5  -4  -1  370.06   31.40
  -5  -4  -1  385.66   26.90
  -5  -4  -1  361.26   23.20
   5   4   1  357.56   29.60
   5   4   1  321.67   28.20
   5   4   1  306.27   27.50
  -6  -4  -1  201.98   17.20
  -6  -4  -1  174.68   21.60
  -6  -4  -1  144.99   24.90
  -6  -4  -1  199.68   22.20
  -6  -4  -1  162.68   19.70
  -6  -4  -1  197.98   21.40
   6   4   1  233.98   23.80
   6   4   1  213.78   26.20
   6   4   1  186.28   26.40
  -7  -4  -1  182.88   29.40
  -7  -4  -1  211.18   17.90
  -7  -4  -1  201.98   17.70
  -7  -4  -1  207.38   24.10
   7   4   1  232.08   25.90
   7   4   1  259.97   20.10
   4  -5  -1   21.80    8.00
   4  -5  -1   27.80    9.30
   4  -5  -1   28.00    8.10
  -4   5   1   40.10    7.50
   3  -5  -1   49.80   11.60
   3  -5  -1   52.39   11.80
   3  -5  -1   31.80    9.40
  -3   5   1   47.60    9.30
  -3   5   1   49.30   10.00
  -3   5   1   57.59   20.00
   2  -5  -1  309.37   33.50
   2  -5  -1  362.36   27.40
   2  -5  -1  350.76   28.10
   2  -5  -1  327.27   28.10
   2  -5  -1  345.47   27.20
  -2   5   1  323.77   31.50
  -2   5   1  344.27   23.50
  -2   5   1  362.46   23.80
  -2   5   1  316.57   39.10
  -2   5   1  313.77   31.20
   1  -5  -1  915.91   52.79
   1  -5  -1 1021.60   53.19
   1  -5  -1  910.21   47.90
   1  -5  -1  950.90   52.99
   1  -5  -1  991.90   54.29
   1  -5  -1  932.31   51.99
   1  -5  -1  929.81   49.50
  -1   5   1 1018.00   48.40
  -1   5   1 1000.80   53.09
  -1   5   1  970.70   53.19
  -1   5   1  993.40   51.89
  -1   5   1 1089.99   48.70
  -1   5   1  857.61   55.89
   0  -5  -1  264.87   21.60
   0  -5  -1  271.47   27.30
   0  -5  -1  270.27   27.60
   0  -5  -1  262.37   22.90
   0  -5  -1  285.57   24.70
   0   5   1  269.67   21.40
   0   5   1  242.78   20.90
   0   5   1  192.58   23.80
   0   5   1  236.08   19.10
   0   5   1  264.57   18.00
  -1  -5  -1  419.56   27.80
   1   5   1  495.05   28.50
   1   5   1  463.35   26.60
   1   5   1  489.85   27.30
   1   5   1  480.55   26.00
   1   5   1  470.45   29.20
  -2  -5  -1  622.04   31.30
  -2  -5  -1  641.84   33.90
  -2  -5  -1  629.24   32.30
  -2  -5  -1  629.84   32.30
   2   5   1  573.14   32.80
   2   5   1  579.04   31.50
   2   5   1  532.15   30.90
   2   5   1  581.94   34.30
  -3  -5  -1   95.19   14.70
  -3  -5  -1   82.79   14.80
  -3  -5  -1   97.49   12.60
  -3  -5  -1   84.19   15.20
   3   5   1   94.99   12.60
   3   5   1  103.89   14.60
   3   5   1  104.79   13.90
   3   5   1   94.89   13.40
   3   5   1   94.49   14.60
  -4  -5  -1  248.88   20.80
  -4  -5  -1  243.28   26.50
  -4  -5  -1  197.78   21.50
  -4  -5  -1  221.08   18.80
  -4  -5  -1  241.38   23.30
   4   5   1  199.28   18.80
   4   5   1  190.58   24.70
   4   5   1  203.08   20.30
   4   5   1  204.18   21.20
   4   5   1  199.98   21.50
  -5  -5  -1  220.78   20.80
  -5  -5  -1  188.78   21.80
  -5  -5  -1  220.08   27.90
  -5  -5  -1  222.18   21.80
   5   5   1  223.68   22.30
   5   5   1  217.58   24.60
   5   5   1  240.38   26.80
  -6  -5  -1   -1.10   14.30
  -6  -5  -1    8.40    8.40
  -6  -5  -1   -4.00   11.50
  -6  -5  -1   -1.10    9.90
  -6  -5  -1   -0.70   11.70
   6   5   1    1.90   11.90
   6   5   1   -0.10   10.00
   6   5   1    8.30   13.20
   6   5   1    6.80   14.70
  -7  -5  -1   31.40   17.20
  -7  -5  -1   13.20    6.90
  -7  -5  -1   23.60   11.30
   7   5   1   17.20    8.40
   3  -6  -1   63.49    9.90
   3  -6  -1   69.59   11.50
  -3   6   1   57.59    8.80
   2  -6  -1  119.09   17.30
   2  -6  -1  131.89   22.40
   2  -6  -1  122.49   16.70
  -2   6   1  104.09   14.40
  -2   6   1  121.29   15.70
   1  -6  -1  309.27   29.90
   1  -6  -1  324.57   28.10
   1  -6  -1  319.07   24.60
   1  -6  -1  325.27   26.50
  -1   6   1  385.96   24.30
  -1   6   1  374.46   23.90
  -1   6   1  302.37   31.50
   0  -6  -1   51.49   11.20
   0  -6  -1   36.70   15.30
   0  -6  -1   59.59   12.50
   0  -6  -1   38.50   17.10
   0  -6  -1   67.79   11.40
   0  -6  -1   50.19   14.00
   0   6   1   83.49   17.10
   0   6   1   66.29   10.40
   0   6   1   74.29   16.90
   0   6   1   82.69   13.10
  -1  -6  -1    8.40    9.60
  -1  -6  -1  -10.90   11.60
  -1  -6  -1   16.50   14.00
   1   6   1   38.60   14.60
   1   6   1   12.00    7.20
   1   6   1   16.90   10.60
   1   6   1    7.10    7.20
   1   6   1   16.60   11.10
  -2  -6  -1  366.66   26.90
  -2  -6  -1  341.17   32.70
   2   6   1  383.96   23.60
   2   6   1  367.96   23.40
   2   6   1  347.27   27.00
   2   6   1  370.46   29.50
   2   6   1  341.17   27.10
  -3  -6  -1  587.44   37.30
  -3  -6  -1  583.14   33.60
  -3  -6  -1  616.74   37.10
  -3  -6  -1  528.25   39.30
  -3  -6  -1  539.25   40.20
  -3  -6  -1  559.34   35.80
   3   6   1  614.64   33.50
   3   6   1  615.04   36.40
   3   6   1  597.04   37.60
   3   6   1  577.24   36.30
  -4  -6  -1   45.60   12.20
  -4  -6  -1   40.90   12.70
  -4  -6  -1   33.80   10.80
  -4  -6  -1   34.00   12.10
  -4  -6  -1   31.90   11.90
   4   6   1   24.00   12.50
   4   6   1   17.10   11.30
   4   6   1   36.50   13.70
   4   6   1   34.00    9.90
   4   6   1   -0.40   19.10
  -5  -6  -1   59.89   14.60
  -5  -6  -1   49.70   11.70
  -5  -6  -1   57.29   12.50
  -5  -6  -1   54.29   11.80
   5   6   1   77.79   17.80
   5   6   1   52.39   10.70
   5   6   1   74.29   18.60
   5   6   1   33.60   13.90
  -6  -6  -1  154.78   21.70
  -6  -6  -1  139.49   16.70
  -6  -6  -1  135.99   21.70
  -6  -6  -1  131.59   22.90
   6   6   1  166.38   26.70
   6   6   1  183.78   23.80
   6   6   1  209.08   22.60
   6   6   1  176.58   19.10
  -7  -6  -1   48.50    8.00
  -7  -6  -1   51.99   11.90
  -7  -6  -1   44.80   12.40
   7   6   1   37.10    9.20
   2  -7  -1  182.48   15.80
   2  -7  -1  171.98   14.60
  -2   7   1  192.18   14.50
   1  -7  -1    3.40    7.90
   1  -7  -1    6.70    9.20
   1  -7  -1    8.00    9.30
  -1   7   1   -0.90    6.70
  -1   7   1   -6.70    8.10
   0  -7  -1   57.49   10.30
   0  -7  -1   37.80   13.40
   0  -7  -1   17.40    9.90
   0   7   1   13.80   13.50
   0   7   1   31.90    8.20
   0   7   1   34.40    9.30
   0   7   1   20.40   14.30
  -1  -7  -1  444.96   32.10
  -1  -7  -1  459.15   28.20
  -1  -7  -1  441.86   33.20
  -1  -7  -1  455.25   27.90
   1   7   1  485.35   28.60
   1   7   1  431.66   32.50
   1   7   1  454.25   36.30
  -2  -7  -1  482.75   30.40
  -2  -7  -1  495.25   29.90
  -2  -7  -1  457.65   35.80
   2   7   1  500.55   30.10
   2   7   1  517.25   37.20
   2   7   1  409.46   39.00
   2   7   1  469.05   33.10
   2   7   1  508.95   29.30
  -3  -7  -1  270.17   22.70
  -3  -7  -1  251.17   20.20
   3   7   1  243.18   19.80
   3   7   1  234.38   21.80
   3   7   1  239.48   26.80
   3   7   1  245.18   31.40
   3   7   1  265.87   24.10
  -4  -7  -1   11.70    8.50
  -4  -7  -1   20.30    9.40
  -4  -7  -1    8.00   15.80
  -4  -7  -1   -9.90   14.90
  -4  -7  -1   27.90   14.90
   4   7   1   18.40   13.80
   4   7   1   30.20   12.90
   4   7   1    8.60   20.90
   4   7   1   37.00    9.70
  -5  -7  -1  188.28   23.40
  -5  -7  -1  159.28   20.90
  -5  -7  -1  154.88   19.70
  -5  -7  -1  143.29   22.80
   5   7   1  195.08   27.40
   5   7   1  225.88   28.30
   5   7   1  193.88   18.80
  -6  -7  -1  192.98   23.90
  -6  -7  -1  206.48   20.60
  -6  -7  -1  211.78   18.60
   6   7   1  242.78   19.10
   6   7   1  258.47   23.80
   0  -8  -1  144.89   15.00
   0  -8  -1  162.88   20.80
   0  -8  -1  171.08   14.20
   0   8   1  176.48   22.70
   0   8   1  173.18   17.20
   0   8   1  187.48   15.00
  -1  -8  -1  284.87   26.80
  -1  -8  -1  257.07   21.90
  -1  -8  -1  271.77   18.60
   1   8   1  249.88   19.10
   1   8   1  285.47   36.10
   1   8   1  267.57   21.60
   1   8   1  255.37   22.70
  -2  -8  -1   25.10    8.30
  -2  -8  -1   21.50    8.00
   2   8   1   12.40    9.50
   2   8   1   13.30   14.60
   2   8   1   36.10   10.80
  -3  -8  -1   49.50    9.20
  -3  -8  -1   30.10    8.40
   3   8   1   47.30   12.20
   3   8   1   34.70   15.40
   3   8   1   61.89   12.10
   3   8   1   52.89    9.60
  -4  -8  -1  269.67   19.80
  -4  -8  -1  276.57   21.60
   4   8   1  316.47   22.90
   4   8   1  265.67   28.20
   4   8   1  311.37   21.80
   4   8   1  312.97   32.90
  -5  -8  -1  176.38   17.20
  -5  -8  -1  164.38   18.60
   5   8   1  181.18   33.00
   5   8   1  172.28   15.80
  -6  -8  -1  142.49   13.50
  -6  -8  -1  111.39   16.20
   6   8   1  113.49   13.00
   6   8   1  107.49   15.70
  -2  -9  -1   97.49   10.60
   2   9   1  111.79   14.60
   2   9   1  115.59   12.50
  -3  -9  -1   16.90    5.30
   3   9   1   16.20    7.70
   3   9   1   29.10    7.70
  -4  -9  -1  546.25   27.80
  -4  -9  -1  531.85   27.90
   4   9   1  563.44   29.90
   4   9   1  608.34   30.40
   3   9  -2   71.49   11.30
   3   9  -2   40.00    8.90
  -3  -9   2   49.40    7.10
   5   8  -2  182.58   16.30
   5   8  -2  154.48   18.80
  -5  -8   2  148.89   17.30
  -5  -8   2  171.68   15.00
   4   8  -2   51.89   10.10
   4   8  -2   61.59    9.60
   4   8  -2   42.60   18.70
   4   8  -2   66.39   13.90
  -4  -8   2   32.70    7.90
  -4  -8   2   49.70    9.00
  -4  -8   2   53.09   12.60
   3   8  -2  222.38   20.40
   3   8  -2  230.98   29.20
   3   8  -2  253.77   22.10
   3   8  -2  232.28   18.00
  -3  -8   2  235.08   17.80
  -3  -8   2  215.88   17.40
   2   8  -2   63.39   11.20
   2   8  -2   47.50    8.80
   2   8  -2   42.50   18.00
  -2  -8   2   39.10    7.70
  -2  -8   2   34.80   12.80
   1   8  -2   30.10    9.00
  -1  -8   2   21.20    7.00
  -1  -8   2   18.20    9.50
  -1  -8   2    5.30   15.90
   0   8  -2  146.09   16.10
   0   8  -2  139.29   13.80
   0  -8   2  148.49   12.80
   0  -8   2  142.29   22.30
   0  -8   2  137.09   14.10
   6   7  -2  587.84   32.70
   6   7  -2  638.84   38.40
  -6  -7   2  648.74   34.60
  -6  -7   2  554.24   36.60
  -6  -7   2  584.64   33.30
   5   7  -2   70.39   21.20
   5   7  -2  133.79   24.60
   5   7  -2   99.39   17.00
   5   7  -2  114.29   15.90
  -5  -7   2  130.99   16.80
  -5  -7   2  109.09   18.10
  -5  -7   2  118.09   22.00
  -5  -7   2  130.99   18.60
   4   7  -2  110.89   14.90
   4   7  -2  119.89   18.10
   4   7  -2  125.29   20.50
   4   7  -2  141.29   19.20
  -4  -7   2  126.59   19.50
  -4  -7   2  159.78   25.20
  -4  -7   2  109.29   17.50
  -4  -7   2  106.09   12.80
  -4  -7   2  145.29   21.00
   3   7  -2  560.74   40.00
   3   7  -2  547.85   33.50
   3   7  -2  575.64   32.60
  -3  -7   2  582.74   32.60
  -3  -7   2  564.24   33.70
  -3  -7   2  570.44   37.40
   2   7  -2   16.00    7.80
   2   7  -2   18.50   12.90
   2   7  -2    4.80   11.60
   2   7  -2   19.10    7.40
  -2  -7   2    4.00    7.70
  -2  -7   2    9.60    8.70
  -2  -7   2    0.70   16.40
  -2  -7   2   12.50   14.70
   1   7  -2  220.18   26.90
   1   7  -2  227.78   18.70
   1   7  -2  194.08   26.10
   1   7  -2  196.78   18.60
  -1  -7   2  231.38   23.90
  -1  -7   2  243.38   19.80
  -1  -7   2  262.77   25.60
   0   7  -2  342.37   32.90
   0   7  -2  330.67   22.60
   0  -7   2  319.07   25.10
   0  -7   2  301.77   25.50
   0  -7   2  329.07   22.60
  -1   7  -2    8.40    7.90
  -1   7  -2    7.90    7.90
   1  -7   2   -2.10    6.50
   1  -7   2   -0.50    8.10
   1  -7   2   -0.50    8.00
  -2   7  -2    4.00    9.10
   2  -7   2   13.30    6.60
   2  -7   2   12.10    6.20
   7   6  -2  318.67   21.70
  -7  -6   2  273.07   18.20
  -7  -6   2  290.57   21.70
   6   6  -2  952.50   52.59
   6   6  -2  896.21   48.20
  -6  -6   2  946.31   51.29
  -6  -6   2  958.40   50.89
  -6  -6   2  948.51   47.10
  -6  -6   2 1018.80   52.79
   5   6  -2  264.17   23.10
   5   6  -2  253.07   32.90
   5   6  -2  276.87   28.60
  -5  -6   2  283.97   24.40
  -5  -6   2  254.47   24.00
  -5  -6   2  280.87   24.70
  -5  -6   2  284.67   25.40
   4   6  -2   22.10   23.40
   4   6  -2   52.79   10.20
   4   6  -2   60.39   12.40
   4   6  -2   51.39   12.00
   4   6  -2   35.20   15.20
   4   6  -2   44.70   13.60
   4   6  -2   71.59   17.50
  -4  -6   2   42.40   11.60
  -4  -6   2   47.00   12.10
  -4  -6   2   25.60   15.60
  -4  -6   2   30.20   12.30
  -4  -6   2   42.80   11.00
   3   6  -2 1987.70   92.09
   3   6  -2 1986.50   91.59
   3   6  -2 2020.30   94.69
   3   6  -2 2007.20   97.29
   3   6  -2 1899.41   94.49
  -3  -6   2 2098.69   94.19
  -3  -6   2 2004.50   94.19
  -3  -6   2 2113.69   95.69
  -3  -6   2 2015.90   92.39
  -3  -6   2 2014.50   95.99
  -3  -6   2 1970.90   91.19
   2   6  -2  255.97   25.60
   2   6  -2  299.17   24.10
   2   6  -2  276.07   19.70
   2   6  -2  302.57   19.90
   2   6  -2  267.77   28.50
  -2  -6   2  237.48   21.40
  -2  -6   2  277.97   22.40
  -2  -6   2  218.38   25.50
  -2  -6   2  238.38   28.60
  -2  -6   2  254.67   27.90
   1   6  -2 1126.89   55.09
   1   6  -2 1084.69   58.79
   1   6  -2 1073.39   61.39
   1   6  -2 1189.98   61.49
  -1  -6   2 1179.38   60.49
  -1  -6   2 1186.58   62.89
  -1  -6   2 1229.48   56.69
  -1  -6   2 1114.19   59.29
  -1  -6   2 1119.79   55.09
   0   6  -2    4.40    6.90
   0   6  -2   16.80   12.40
   0   6  -2    7.10    8.40
   0   6  -2   -7.20   15.50
   0  -6   2    5.70   15.30
   0  -6   2    5.70    8.60
   0  -6   2   11.50   12.20
   0  -6   2    7.40   11.40
   0  -6   2    9.20   11.30
  -1   6  -2  431.66   25.70
  -1   6  -2  419.16   26.60
   1  -6   2  375.16   29.10
   1  -6   2  418.66   30.10
   1  -6   2  398.76   27.20
   1  -6   2  392.66   31.50
  -2   6  -2    9.40    8.80
  -2   6  -2    3.50    8.40
   2  -6   2    8.30    8.80
   2  -6   2   -1.60    7.30
   2  -6   2    1.10    7.80
   2  -6   2   11.90   12.70
  -3   6  -2   51.09    9.20
   3  -6   2   36.50    7.80
   3  -6   2   28.90   10.30
   3  -6   2   31.90    7.60
   7   5  -2  186.08   17.40
  -7  -5   2  170.68   14.50
  -7  -5   2  129.59   21.80
  -7  -5   2  129.59   19.50
   6   5  -2  210.48   24.70
   6   5  -2  223.18   28.20
   6   5  -2  219.78   21.30
  -6  -5   2  259.37   24.10
  -6  -5   2  246.38   19.80
  -6  -5   2  233.68   23.30
  -6  -5   2  225.88   26.50
   5   5  -2 1064.39   56.39
   5   5  -2 1135.39   61.19
   5   5  -2 1035.60   62.19
  -5  -5   2 1127.39   55.69
  -5  -5   2 1119.29   58.69
  -5  -5   2 1116.09   57.39
  -5  -5   2 1135.39   60.09
   4   5  -2  164.38   25.70
   4   5  -2  205.08   21.60
   4   5  -2  197.88   21.40
   4   5  -2  234.58   34.20
   4   5  -2  206.98   19.10
   4   5  -2  230.78   21.30
   4   5  -2  236.48   18.00
   4   5  -2  194.08   21.50
  -4  -5   2  190.78   18.50
  -4  -5   2  181.78   23.90
  -4  -5   2  151.48   21.80
  -4  -5   2  189.18   20.10
  -4  -5   2  203.08   24.60
   3   5  -2 1154.68   57.59
   3   5  -2 1087.89   56.89
   3   5  -2 1128.49   53.59
   3   5  -2 1066.19   52.89
   3   5  -2 1098.09   54.29
  -3  -5   2 1094.29   56.79
  -3  -5   2 1106.59   55.39
  -3  -5   2 1104.99   56.49
  -3  -5   2 1100.99   53.89
   2   5  -2  132.79   15.50
   2   5  -2  119.89   12.20
   2   5  -2  129.89   14.30
   2   5  -2  135.89   13.20
  -2  -5   2  105.39   21.10
  -2  -5   2  111.09   13.30
  -2  -5   2   95.69   14.30
  -2  -5   2   99.09   16.10
   1   5  -2  625.14   34.90
   1   5  -2  719.93   37.00
   1   5  -2  691.73   38.70
   1   5  -2  684.13   34.60
  -1  -5   2  716.33   41.90
  -1  -5   2  680.23   36.50
  -1  -5   2  731.73   37.60
   0   5  -2    3.40    9.20
   0   5  -2   19.70    6.60
   0   5  -2    8.90    8.80
   0  -5   2   29.70   11.50
   0  -5   2   33.40   13.60
   0  -5   2   28.50   10.20
   0  -5   2   18.60    9.60
   0  -5   2   23.00   11.60
  -1   5  -2  431.66   24.40
  -1   5  -2  395.56   30.10
  -1   5  -2  373.86   26.50
   1  -5   2  410.06   30.40
   1  -5   2  448.36   30.30
   1  -5   2  396.86   31.50
   1  -5   2  388.46   30.90
   1  -5   2  418.36   32.40
   1  -5   2  402.86   27.50
  -2   5  -2  123.09   18.30
  -2   5  -2  148.69   15.70
  -2   5  -2  102.79   19.10
   2  -5   2  190.68   21.70
   2  -5   2  159.98   20.30
   2  -5   2  142.59   20.90
   2  -5   2  135.49   19.40
   2  -5   2  148.69   22.80
  -3   5  -2   88.49   12.10
  -3   5  -2   94.79   14.80
   3  -5   2  132.19   17.30
   3  -5   2  127.59   17.20
   3  -5   2  114.89   16.30
   3  -5   2   96.39   14.20
  -4   5  -2  434.36   24.70
   4  -5   2  483.05   26.00
   4  -5   2  448.36   26.50
   4  -5   2  441.66   25.40
   7   4  -2  111.19   14.90
  -7  -4   2  106.59   20.40
  -7  -4   2  103.19   12.60
  -7  -4   2   97.99   16.00
   6   4  -2   82.69   13.70
   6   4  -2   73.29   14.20
   6   4  -2   98.29   18.60
  -6  -4   2   71.29   13.30
  -6  -4   2   72.39   18.50
  -6  -4   2   72.09   13.50
  -6  -4   2   69.49   11.50
   5   4  -2  795.02   46.60
   5   4  -2  741.93   43.50
   5   4  -2  789.62   48.50
  -5  -4   2  828.82   45.00
  -5  -4   2  714.13   48.10
  -5  -4   2  708.53   39.60
  -5  -4   2  815.12   42.70
  -5  -4   2  828.72   43.80
   4   4  -2  769.82   40.90
   4   4  -2  773.62   41.30
   4   4  -2  755.92   38.30
   4   4  -2  775.02   39.20
   4   4  -2  762.82   42.20
   4   4  -2  767.82   39.70
   4   4  -2  718.13   47.40
  -4  -4   2  678.83   40.30
  -4  -4   2  673.53   37.90
  -4  -4   2  717.63   45.00
  -4  -4   2  693.93   41.70
  -4  -4   2  738.53   39.40
  -4  -4   2  728.53   41.10
   3   4  -2 1714.83   78.39
   3   4  -2 1621.34   74.49
   3   4  -2 1699.33   75.29
   3   4  -2 1668.23   74.69
  -3  -4   2 1633.54   75.49
  -3  -4   2 1615.84   76.79
  -3  -4   2 1619.24   76.99
   2   4  -2  728.13   37.60
   2   4  -2  762.52   37.50
   2   4  -2  719.93   37.70
   2   4  -2  729.23   40.00
  -2  -4   2  831.82   39.70
  -2  -4   2  881.31   39.60
  -2  -4   2  837.02   38.30
   1   4  -2 1359.36   58.79
   1   4  -2 1336.57   56.49
   1   4  -2 1112.69   52.79
   1   4  -2 1329.47   55.19
  -1  -4   2 1168.78   54.79
  -1  -4   2 1158.18   58.49
  -1  -4   2 1195.58   56.59
  -1  -4   2 1147.49   56.49
   0   4  -2  442.96   23.10
   0   4  -2  468.05   25.40
   0   4  -2  430.66   23.70
   0  -4   2  471.55   25.10
   0  -4   2  484.05   26.70
  -1   4  -2   20.50    6.20
  -1   4  -2   12.70    8.10
  -1   4  -2   14.20    7.30
  -1   4  -2   17.90   12.40
   1  -4   2   14.90   22.00
   1  -4   2    1.30   11.90
   1  -4   2   -1.40    8.00
   1  -4   2   12.80    7.30
   1  -4   2    2.60   10.30
  -2   4  -2  545.35   37.70
  -2   4  -2  638.64   39.00
  -2   4  -2  635.94   32.60
  -2   4  -2  633.74   39.10
   2  -4   2  730.93   40.40
   2  -4   2  638.84   38.80
   2  -4   2  644.64   39.50
   2  -4   2  632.44   38.40
   2  -4   2  620.04   39.30
   2  -4   2  734.13   61.19
   2  -4   2  645.54   40.60
  -3   4  -2  624.74   40.60
  -3   4  -2  540.15   42.80
  -3   4  -2  585.34   33.50
  -3   4  -2  595.04   46.50
  -3   4  -2  619.54   32.60
   3  -4   2  582.44   38.60
   3  -4   2  543.05   36.50
   3  -4   2  632.04   38.00
   3  -4   2  589.74   41.90
   3  -4   2  618.24   37.80
  -4   4  -2  392.76   25.90
  -4   4  -2  401.56   36.50
  -4   4  -2  411.66   25.90
   4  -4   2  424.16   29.20
   4  -4   2  464.85   29.00
   4  -4   2  410.46   28.20
   4  -4   2  455.45   28.20
   7   3  -2   18.80    7.70
  -7  -3   2    8.80    8.90
  -7  -3   2    7.80    6.90
   6   3  -2    1.80    9.80
  -6  -3   2  -20.10   22.20
  -6  -3   2    3.80   11.10
  -6  -3   2   15.70    8.20
  -6  -3   2   11.70   11.80
  -6  -3   2    0.30   12.10
  -6  -3   2   -4.20    7.50
   5   3  -2 1029.70   55.19
   5   3  -2  994.60   54.29
   5   3  -2  985.70   51.39
  -5  -3   2 1007.20   52.69
  -5  -3   2  922.41   48.60
  -5  -3   2  912.41   58.99
  -5  -3   2 1049.99   51.69
  -5  -3   2  910.91   50.69
  -5  -3   2  909.01   55.09
  -5  -3   2 1002.10   50.89
  -5  -3   2  981.90   47.90
   4   3  -2  649.04   34.70
   4   3  -2  718.73   38.70
   4   3  -2  642.64   35.10
   4   3  -2  636.64   36.30
   4   3  -2  649.34   34.80
  -4  -3   2  713.33   37.70
  -4  -3   2  682.53   35.90
  -4  -3   2  624.34   33.60
  -4  -3   2  656.83   34.40
  -4  -3   2  679.73   37.80
   3   3  -2 1022.60   47.30
   3   3  -2 1055.89   47.10
   3   3  -2 1007.40   47.10
   3   3  -2 1076.99   47.50
   3   3  -2 1098.79   49.99
   3   3  -2  949.71   47.10
   3   3  -2 1013.00   52.09
  -3  -3   2  895.01   46.20
  -3  -3   2  987.00   47.40
  -3  -3   2  964.60   48.50
  -3  -3   2  943.51   48.30
   2   3  -2  406.06   23.50
   2   3  -2  449.26   22.10
   2   3  -2  406.66   26.70
   2   3  -2  428.46   22.10
  -2  -3   2  443.76   22.60
  -2  -3   2  426.66   23.70
  -2  -3   2  446.46   23.20
   1   3  -2 2055.89   87.29
   1   3  -2 2116.59   89.49
   1   3  -2 2032.60   88.79
   1   3  -2 2079.59   91.09
  -1  -3   2 2099.19   89.69
  -1  -3   2 2038.40   89.19
  -1  -3   2 2029.20   91.39
  -1  -3   2 2099.89   90.39
   0   3  -2  313.47   17.10
   0   3  -2  350.46   18.40
   0  -3   2  351.56   18.10
   0  -3   2  343.47   18.50
   0  -3   2  357.86   19.50
  -1   3  -2 1365.66   58.09
  -1   3  -2 1379.06   58.99
  -1   3  -2 1132.49   54.99
   1  -3   2 1255.17   59.19
   1  -3   2 1232.38   57.19
  -2   3  -2 2726.83  128.09
  -2   3  -2 3188.58  133.29
  -2   3  -2 3147.39  133.69
   2  -3   2 2970.80  133.79
  -3   3  -2  459.75   32.30
  -3   3  -2  414.26   28.40
  -3   3  -2  514.45   26.50
  -3   3  -2  522.45   32.90
   3  -3   2  430.76   32.00
   3  -3   2  474.05   32.40
   3  -3   2  485.85   34.50
   3  -3   2  459.95   32.60
   3  -3   2  414.06   33.50
   3  -3   2  454.65   33.70
   3  -3   2  430.36   36.80
  -4   3  -2   14.60    8.20
  -4   3  -2   21.50    9.00
  -4   3  -2   32.10   13.80
   4  -3   2   26.80   10.30
   4  -3   2   19.90   12.00
   4  -3   2    7.90   23.10
   4  -3   2   25.10   11.90
   4  -3   2   23.70   10.70
  -5   3  -2   31.00    8.70
  -5   3  -2   36.70    9.40
  -5   3  -2   30.00   15.00
   5  -3   2   53.19    9.80
   5  -3   2   19.70    7.30
   5  -3   2   36.90   10.40
   7   2  -2  263.37   18.40
   7   2  -2  280.47   20.20
  -7  -2   2  259.67   19.30
  -7  -2   2  239.98   18.00
   6   2  -2  242.18   22.10
  -6  -2   2  250.87   21.90
  -6  -2   2  242.08   29.20
  -6  -2   2  223.68   21.40
  -6  -2   2  175.38   26.40
  -6  -2   2  227.38   18.50
   5   2  -2  736.03   44.00
   5   2  -2  792.22   43.70
   5   2  -2  723.03   44.10
   5   2  -2  782.22   44.60
  -5  -2   2  708.53   41.80
  -5  -2   2  739.53   41.20
  -5  -2   2  732.63   41.50
  -5  -2   2  656.03   46.00
  -5  -2   2  738.53   38.40
  -5  -2   2  804.52   43.20
  -5  -2   2  733.23   39.20
   4   2  -2 1059.99   52.89
  -4  -2   2  969.60   48.20
  -4  -2   2 1030.50   51.39
  -4  -2   2 1006.90   48.70
  -4  -2   2 1034.20   50.09
  -4  -2   2 1043.50   51.99
   3   2  -2   37.80    8.00
   3   2  -2   27.60    5.40
   3   2  -2   28.20    5.30
   3   2  -2   21.70    6.30
  -3  -2   2   31.40    6.10
  -3  -2   2   42.40    6.90
  -3  -2   2   36.90    7.80
  -3  -2   2   33.30    6.50
   2   2  -2  314.37   19.00
   2   2  -2  331.47   18.10
   2   2  -2  326.57   16.90
   2   2  -2  328.17   16.10
  -2  -2   2  273.57   17.70
  -2  -2   2  282.37   16.40
  -2  -2   2  277.27   16.60
   1   2  -2  911.11   41.40
   1   2  -2  937.71   42.90
  -1  -2   2  950.30   42.10
  -1  -2   2  985.40   42.50
   0   2  -2  150.78    9.40
   0   2  -2  184.58    9.50
   0   2  -2  152.98    8.50
   0  -2   2  157.58   10.20
   0  -2   2  170.28   10.00
   0  -2   2  166.58    9.30
  -1   2  -2 2522.65  107.09
  -1   2  -2 2531.75  108.89
  -1   2  -2 2372.26  107.19
   1  -2   2 2673.83  110.19
   1  -2   2 2596.14  109.09
  -2   2  -2 1065.69   49.50
  -2   2  -2 1174.08   54.09
   2  -2   2 1235.98   54.99
   2  -2   2 1183.88   53.09
  -3   2  -2  187.58   16.60
  -3   2  -2  152.38   12.00
   3  -2   2  147.29   20.90
   3  -2   2  150.78   15.80
   3  -2   2  110.59   16.30
   3  -2   2  104.19   17.00
  -4   2  -2  173.08   23.90
  -4   2  -2  157.18   17.20
  -4   2  -2  189.98   16.00
   4  -2   2  131.19   19.10
   4  -2   2  171.78   22.50
   4  -2   2  143.59   21.70
   4  -2   2  164.28   21.80
   4  -2   2  154.58   20.90
   4  -2   2  138.89   20.70
  -5   2  -2  108.49   15.40
   5  -2   2  135.59   18.00
   5  -2   2   84.09   14.10
   5  -2   2  107.69   16.70
  -6   2  -2   18.30    6.80
   6  -2   2   17.30    7.00
   6  -2   2   20.80    7.30
   6  -2   2   15.80    7.80
   7   1  -2   64.69    9.80
   7   1  -2   62.69   10.10
  -7  -1   2   88.39   11.60
  -7  -1   2   75.99   10.10
   6   1  -2  669.63   38.80
  -6  -1   2  673.43   38.00
  -6  -1   2  696.23   39.40
  -6  -1   2  698.33   36.30
   5   1  -2  278.07   25.40
   5   1  -2  201.98   33.30
   5   1  -2  291.67   26.00
  -5  -1   2  274.47   25.70
  -5  -1   2  285.77   20.70
  -5  -1   2  242.68   25.30
  -5  -1   2  270.97   19.70
  -5  -1   2  281.47   24.80
  -5  -1   2  190.48   33.90
  -5  -1   2  273.47   24.20
   4   1  -2 1447.76   73.09
  -4  -1   2 1572.74   69.69
  -4  -1   2 1568.64   70.69
  -4  -1   2 1472.45   71.69
  -4  -1   2 1575.64   69.49
  -4  -1   2 1586.54   71.59
  -4  -1   2 1443.66   71.69
   3   1  -2  224.48   12.90
   3   1  -2  231.48   16.40
   3   1  -2  233.68   13.60
  -3  -1   2  205.68   13.90
  -3  -1   2  212.78   14.70
  -3  -1   2  214.78   15.90
  -3  -1   2  204.48   14.30
   2   1  -2  102.39    7.30
   2   1  -2  107.49    9.40
   2   1  -2  110.49    7.80
  -2  -1   2  119.29    8.40
  -2  -1   2  115.49    8.40
   1   1  -2 5302.27  226.38
   1   1  -2 5366.56  227.58
   1   1  -2 5351.36  227.18
  -1  -1   2 5450.96  227.18
  -1  -1   2 5589.04  227.48
  -1   1  -2 1523.65   65.99
   1  -1   2 1583.84   66.99
   1  -1   2 1522.95   66.99
  -2   1  -2  665.03   33.70
  -2   1  -2  751.22   34.00
   2  -1   2  786.72   35.30
   2  -1   2  773.82   35.60
  -3   1  -2  106.49   11.90
  -3   1  -2  126.59   11.10
  -3   1  -2   94.19    9.60
   3  -1   2   78.79   10.70
  -4   1  -2  189.98   19.90
  -4   1  -2  152.68   16.50
  -4   1  -2  212.38   14.90
   4  -1   2  195.68   22.20
   4  -1   2  181.98   22.70
   4  -1   2  179.58   18.80
   4  -1   2  187.98   24.20
   4  -1   2  162.68   21.10
   4  -1   2  163.18   21.00
  -5   1  -2  156.98   16.40
  -5   1  -2  154.48   16.00
  -5   1  -2  121.59   21.20
  -5   1  -2   99.59   19.60
   5  -1   2  184.78   22.00
   5  -1   2  164.08   19.20
   5  -1   2  133.69   21.30
   5  -1   2  156.98   20.30
   5  -1   2  143.99   20.90
  -6   1  -2   30.60   15.50
  -6   1  -2   50.69    8.70
  -6   1  -2   51.29   10.30
   6  -1   2   78.39   12.10
   6  -1   2   54.89   10.20
   6  -1   2   74.89   12.50
   6   0  -2  307.47   21.40
   6   0  -2  317.27   23.70
  -6   0   2  305.27   24.50
  -6   0   2  297.17   23.90
  -6   0   2  285.57   22.20
  -6   0   2  310.57   20.50
   5   0  -2  671.53   44.50
   5   0  -2  657.03   43.90
   5   0  -2  684.53   41.20
   5   0  -2  648.74   43.90
  -5   0   2  700.13   41.20
  -5   0   2  725.03   44.20
  -5   0   2  788.12   38.40
  -5   0   2  743.43   38.60
   4   0  -2  221.88   20.00
   4   0  -2  213.48   23.40
  -4   0   2  257.17   25.70
  -4   0   2  253.87   19.90
  -4   0   2  293.87   22.50
  -4   0   2  281.67   20.80
  -4   0   2  236.48   22.70
  -4   0   2  288.37   18.30
  -4   0   2  307.57   18.70
   3   0  -2 2186.78   90.39
   3   0  -2 2182.28   91.39
   3   0  -2 2250.27   94.29
  -3   0   2 2100.19   91.69
  -3   0   2 2003.50   91.59
  -3   0   2 2166.98   92.49
  -3   0   2 1955.50   92.69
  -3   0   2 1979.10   91.49
  -3   0   2 2053.89   93.09
   2   0  -2  145.59    8.80
   2   0  -2  150.08   11.20
   2   0  -2  143.29    9.10
  -2   0   2  133.19    9.50
  -2   0   2  142.49    9.50
  -2   0   2  138.59    9.10
  -2   0   2  139.29    9.50
   1   0  -2 2562.14  106.79
   1   0  -2 2394.26  106.79
   1   0  -2 2493.95  106.79
  -1   0   2 2697.63  106.89
  -1   0   2 2489.65  106.69
  -1   0   2 2489.85  106.99
   0   0  -2 4663.23  190.48
   0   0   2 4555.74  189.58
   0   0   2 4230.38  190.48
   0   0   2 4576.04  190.38
   0   0   2 4725.93  190.08
  -1   0  -2 9999.00  411.16
   1   0   2 9753.82  412.06
  -2   0  -2 2101.59   88.39
  -2   0  -2 2083.79   88.79
   2   0   2 2014.30   88.59
   2   0   2 2010.10   89.09
  -3   0  -2  100.49   12.60
  -3   0  -2   92.99    9.00
  -3   0  -2  106.49    9.90
  -3   0  -2   99.19    9.90
   3   0   2   77.09    9.10
  -4   0  -2  231.88   17.70
  -4   0  -2  186.98   17.10
  -4   0  -2  236.68   15.90
  -4   0  -2  205.98   20.70
  -4   0  -2  220.28   20.00
   4   0   2  236.38   26.70
   4   0   2  236.48   18.50
   4   0   2  262.17   22.40
  -5   0  -2  584.44   30.30
  -5   0  -2  563.44   30.20
  -5   0  -2  581.34   37.40
  -5   0  -2  516.75   38.30
   5   0   2  493.45   34.80
   5   0   2  454.25   34.80
   5   0   2  511.65   33.40
   5   0   2  481.85   34.80
   5   0   2  455.55   33.90
   5   0   2  489.05   31.60
  -6   0  -2  486.85   29.40
  -6   0  -2  469.65   32.90
  -6   0  -2  508.15   29.00
   6   0   2  458.25   31.00
   6   0   2  455.05   32.00
   6   0   2  546.95   32.80
  -7   0  -2  416.16   21.70
   7   0   2  330.97   22.20
   7   0   2  381.06   22.00
   6  -1  -2   26.10    8.60
  -6   1   2   10.20    9.20
  -6   1   2    8.50    9.90
  -6   1   2   10.50    9.40
   5  -1  -2   35.30   12.00
   5  -1  -2   63.29   13.70
   5  -1  -2   11.70   19.20
   5  -1  -2   23.10   14.00
   5  -1  -2   41.20   10.80
  -5   1   2   59.69   13.70
  -5   1   2   58.69   10.40
  -5   1   2   96.29   34.60
  -5   1   2   70.89   11.90
   4  -1  -2  201.88   27.20
   4  -1  -2  180.88   23.90
   4  -1  -2  201.08   20.70
   4  -1  -2  173.18   21.90
  -4   1   2  178.78   24.10
  -4   1   2  188.18   19.80
  -4   1   2  181.78   16.40
  -4   1   2  192.88   16.00
   3  -1  -2  262.47   17.20
   3  -1  -2  248.18   18.40
  -3   1   2  241.28   17.10
  -3   1   2  257.87   16.00
  -3   1   2  232.38   17.20
   2  -1  -2  331.87   17.10
   2  -1  -2  343.57   18.50
   2  -1  -2  339.07   17.60
  -2   1   2  283.07   16.20
  -2   1   2  303.27   16.80
  -2   1   2  308.47   17.90
   1  -1  -2 1187.48   51.29
   1  -1  -2 1172.18   49.70
   1  -1  -2 1191.58   51.09
   1  -1  -2 1195.78   51.19
  -1   1   2 1056.39   50.99
   0  -1  -2    8.00    1.70
   0  -1  -2    7.20    2.10
   0  -1  -2    9.00    1.20
   0  -1  -2    6.50    1.80
   0   1   2    3.10    1.80
   0   1   2    4.60    2.00
   0   1   2    7.60    2.70
  -1  -1  -2 2333.97   91.49
  -1  -1  -2 2215.18   91.99
  -1  -1  -2 2178.18   91.19
   1   1   2 2124.59   91.39
   1   1   2 2090.69   92.29
   1   1   2 2160.18   91.79
   1   1   2 2124.79   91.89
   1   1   2 2058.69   92.09
  -2  -1  -2 1768.62   75.99
  -2  -1  -2 1836.42   76.59
   2   1   2 1772.62   76.59
   2   1   2 1653.83   73.49
   2   1   2 1714.23   76.29
   2   1   2 1764.02   76.19
  -3  -1  -2  440.76   24.50
  -3  -1  -2  431.46   23.40
  -3  -1  -2  409.26   21.70
  -3  -1  -2  423.66   22.80
   3   1   2  418.56   23.60
   3   1   2  439.26   23.50
  -4  -1  -2  405.66   23.10
  -4  -1  -2  383.36   26.00
  -4  -1  -2  384.96   25.40
  -4  -1  -2  427.56   24.20
  -4  -1  -2  420.86   24.60
   4   1   2  451.25   25.60
   4   1   2  471.85   27.00
  -5  -1  -2   74.09   13.30
  -5  -1  -2   77.79   12.80
  -5  -1  -2   82.49   16.40
  -5  -1  -2   74.79   14.00
  -5  -1  -2   77.49   11.60
  -5  -1  -2   86.19   18.80
   5   1   2   68.59   13.80
   5   1   2   61.69   11.90
   5   1   2   92.79   15.90
   5   1   2   46.70   16.30
   5   1   2   75.09   13.20
  -6  -1  -2  687.33   35.40
  -6  -1  -2  649.93   34.40
  -6  -1  -2  598.64   37.10
   6   1   2  528.15   37.50
   6   1   2  585.24   34.60
   6   1   2  601.14   38.40
   6   1   2  641.64   37.50
  -7  -1  -2  607.94   29.90
  -7  -1  -2  594.24   31.70
  -7  -1  -2  537.25   31.10
   7   1   2  542.15   30.90
   7   1   2  496.75   30.90
   6  -2  -2   74.89   10.80
  -6   2   2   61.89   11.50
  -6   2   2   84.39   10.40
   5  -2  -2  251.67   21.90
   5  -2  -2  243.58   23.10
   5  -2  -2  230.38   21.00
  -5   2   2  186.88   18.60
  -5   2   2  202.98   21.70
  -5   2   2  232.18   18.50
  -5   2   2  193.88   23.90
   4  -2  -2  314.27   26.10
   4  -2  -2  298.77   29.40
   4  -2  -2  277.07   26.40
   4  -2  -2  266.47   23.30
   4  -2  -2  263.87   27.50
   4  -2  -2  232.48   29.00
  -4   2   2  264.47   29.00
  -4   2   2  320.07   21.10
  -4   2   2  349.37   21.00
  -4   2   2  304.87   23.90
  -4   2   2  321.97   28.60
   3  -2  -2  458.95   31.30
   3  -2  -2  448.36   28.20
   3  -2  -2  437.26   30.80
   3  -2  -2  389.66   29.20
   3  -2  -2  398.76   33.40
  -3   2   2  447.16   24.30
  -3   2   2  411.26   24.70
  -3   2   2  434.76   27.80
   2  -2  -2   47.20    8.00
   2  -2  -2   47.30    8.20
  -2   2   2   57.19    8.00
  -2   2   2   55.89    8.80
   1  -2  -2 5046.80  209.08
   1  -2  -2 5118.19  209.18
   1  -2  -2 5110.19  209.28
  -1   2   2 4762.02  208.88
  -1   2   2 4577.44  207.18
   0  -2  -2 2662.73  109.99
   0  -2  -2 2645.24  111.69
   0  -2  -2 2596.84  112.39
   0  -2  -2 2690.03  112.69
   0   2   2 2583.94  111.99
   0   2   2 2600.64  113.49
   0   2   2 2564.24  112.09
  -1  -2  -2 3228.38  144.39
  -1  -2  -2 3465.15  145.19
  -1  -2  -2 3342.27  144.79
   1   2   2 3642.94  146.79
   1   2   2 3453.35  145.09
   1   2   2 3406.96  145.19
  -2  -2  -2 1094.19   50.19
  -2  -2  -2 1059.79   49.60
   2   2   2 1161.88   51.39
   2   2   2 1117.69   49.90
   2   2   2 1113.29   50.39
  -3  -2  -2 1111.09   49.50
  -3  -2  -2 1128.69   50.49
  -3  -2  -2 1104.59   50.69
  -3  -2  -2 1015.80   48.10
   3   2   2  988.20   45.70
   3   2   2 1096.39   49.80
   3   2   2 1095.69   51.09
   3   2   2 1042.20   50.19
   3   2   2  984.00   46.40
  -4  -2  -2  941.91   46.60
  -4  -2  -2  919.11   45.30
  -4  -2  -2  956.50   48.20
  -4  -2  -2  948.51   45.30
  -4  -2  -2  967.70   48.50
   4   2   2  975.80   48.60
  -5  -2  -2  282.67   20.10
  -5  -2  -2  287.27   20.20
  -5  -2  -2  240.68   25.80
  -5  -2  -2  280.47   24.00
  -5  -2  -2  283.37   22.50
  -5  -2  -2  263.37   26.90
   5   2   2  355.46   25.50
   5   2   2  300.47   32.70
   5   2   2  324.37   24.70
   5   2   2  277.97   29.00
   5   2   2  360.26   26.90
  -6  -2  -2  541.65   30.50
  -6  -2  -2  529.95   33.20
  -6  -2  -2  484.45   34.70
  -6  -2  -2  492.65   35.50
  -6  -2  -2  535.45   29.20
  -6  -2  -2  518.25   39.70
   6   2   2  433.16   33.50
   6   2   2  448.96   31.40
   6   2   2  404.56   36.70
  -7  -2  -2  169.98   17.30
  -7  -2  -2  162.28   14.80
  -7  -2  -2  143.79   17.50
   7   2   2  176.38   15.40
   7   2   2  162.98   17.80
   7   2   2  204.18   20.30
   5  -3  -2   42.70   10.40
   5  -3  -2   40.60    9.10
  -5   3   2   27.00   12.80
  -5   3   2   34.00    7.30
  -5   3   2   33.00   12.30
  -5   3   2   34.80    9.40
   4  -3  -2  303.67   24.80
   4  -3  -2  258.97   27.10
   4  -3  -2  314.37   27.10
   4  -3  -2  302.37   25.90
  -4   3   2  319.77   22.10
  -4   3   2  354.86   27.10
  -4   3   2  316.97   22.50
  -4   3   2  295.47   28.80
   3  -3  -2  170.08   21.80
   3  -3  -2  167.28   21.20
   3  -3  -2  156.48   19.80
   3  -3  -2  168.68   23.00
   3  -3  -2  134.89   24.00
   3  -3  -2  181.38   21.90
  -3   3   2  186.68   18.80
  -3   3   2  152.78   15.00
  -3   3   2  176.88   16.00
  -3   3   2  160.88   21.30
  -3   3   2  151.48   20.50
  -3   3   2  145.29   20.40
   2  -3  -2  159.18   16.70
  -2   3   2  199.28   17.10
  -2   3   2  211.28   16.90
  -2   3   2  177.68   16.20
  -2   3   2  180.68   13.70
  -2   3   2  186.88   15.60
   1  -3  -2 2685.23  113.09
   1  -3  -2 2570.14  112.89
  -1   3   2 2475.25  112.49
  -1   3   2 2563.64  110.49
  -1   3   2 2593.54  113.09
  -1   3   2 2469.05  111.99
   0  -3  -2   40.80    6.50
   0  -3  -2   31.20    5.70
   0   3   2   34.30    6.00
   0   3   2   44.30    6.80
   0   3   2   43.60    7.40
   0   3   2   38.20    6.40
  -1  -3  -2 3976.90  167.68
  -1  -3  -2 3860.71  166.48
  -1  -3  -2 4046.20  166.98
   1   3   2 3881.81  167.68
   1   3   2 3990.60  167.38
   1   3   2 3927.51  168.28
   1   3   2 3918.01  170.38
  -2  -3  -2 4301.57  178.88
  -2  -3  -2 4347.96  178.28
  -2  -3  -2 4169.88  179.08
   2   3   2 4065.59  180.78
   2   3   2 4152.38  179.48
   2   3   2 4142.69  178.78
   2   3   2 4079.29  177.68
   2   3   2 4237.28  178.18
  -3  -3  -2  278.67   16.40
  -3  -3  -2  272.57   18.00
  -3  -3  -2  279.67   17.30
  -3  -3  -2  266.47   16.10
   3   3   2  242.48   18.70
   3   3   2  216.78   16.10
   3   3   2  216.58   17.30
   3   3   2  227.28   17.30
  -4  -3  -2  384.66   24.60
  -4  -3  -2  414.96   25.30
  -4  -3  -2  375.06   21.80
  -4  -3  -2  392.96   23.10
  -4  -3  -2  364.86   22.00
   4   3   2  344.47   24.20
   4   3   2  341.87   25.70
   4   3   2  334.07   23.20
  -5  -3  -2  350.16   25.80
  -5  -3  -2  289.17   27.90
  -5  -3  -2  317.67   24.00
  -5  -3  -2  338.57   21.80
  -5  -3  -2  312.17   21.90
  -5  -3  -2  310.17   27.00
   5   3   2  344.77   25.50
   5   3   2  326.87   32.50
   5   3   2  367.56   27.10
   5   3   2  345.87   27.50
  -6  -3  -2  179.18   21.70
  -6  -3  -2  167.08   20.60
  -6  -3  -2  146.19   21.20
  -6  -3  -2  192.58   16.20
  -6  -3  -2  177.98   17.60
   6   3   2  145.59   21.10
   6   3   2  141.79   24.50
  -7  -3  -2  174.18   17.30
  -7  -3  -2  168.88   19.30
  -7  -3  -2  153.78   25.80
  -7  -3  -2  165.88   15.30
   7   3   2  188.98   17.00
   7   3   2  191.18   20.20
   7   3   2  154.78   20.80
   4  -4  -2   -4.00    9.40
   4  -4  -2   13.30    9.20
   4  -4  -2   11.70    8.30
  -4   4   2   21.30   14.30
  -4   4   2   13.40    6.90
  -4   4   2   13.10    8.30
  -4   4   2   14.10   14.40
   3  -4  -2   88.99   16.50
   3  -4  -2   61.59   12.70
   3  -4  -2   90.99   15.80
  -3   4   2  107.09   22.20
  -3   4   2   69.79   16.80
  -3   4   2  109.19   17.00
  -3   4   2   79.99   13.70
  -3   4   2   92.39   14.40
  -3   4   2  117.29   21.40
   2  -4  -2  100.79   16.20
   2  -4  -2  117.49   17.00
   2  -4  -2  114.39   19.10
   2  -4  -2  152.68   22.70
   2  -4  -2  101.69   13.50
   2  -4  -2  143.39   20.70
  -2   4   2  141.99   20.30
  -2   4   2  122.89   20.50
  -2   4   2  127.49   20.40
  -2   4   2  149.69   14.10
  -2   4   2  132.09   18.10
  -2   4   2  127.69   15.60
   1  -4  -2  739.33   41.50
   1  -4  -2  796.72   44.50
   1  -4  -2  771.12   46.70
   1  -4  -2  860.11   47.10
  -1   4   2  817.72   42.50
  -1   4   2  751.22   40.80
  -1   4   2  810.12   38.80
  -1   4   2  795.22   41.80
  -1   4   2  747.23   39.00
   0  -4  -2    6.20    5.30
   0   4   2   -2.40    4.90
   0   4   2    6.10    7.00
   0   4   2    0.20    4.70
   0   4   2    2.20    5.40
   0   4   2    1.60    7.90
  -1  -4  -2 3710.23  159.08
  -1  -4  -2 3847.31  159.08
  -1  -4  -2 3895.01  161.68
  -1  -4  -2 3687.43  158.68
   1   4   2 3645.74  160.38
   1   4   2 3814.02  160.48
   1   4   2 3738.33  161.98
   1   4   2 3576.04  160.38
   1   4   2 3817.62  161.18
  -2  -4  -2 2409.16  102.49
  -2  -4  -2 2289.57  102.59
  -2  -4  -2 2331.97  101.49
   2   4   2 2392.46  101.99
   2   4   2 2351.36  104.29
   2   4   2 2291.67  102.99
   2   4   2 2338.07  101.89
   2   4   2 2223.08  106.99
  -3  -4  -2   39.40    8.80
  -3  -4  -2   31.80    7.70
  -3  -4  -2   26.50    8.00
  -3  -4  -2   33.20    7.90
  -3  -4  -2   33.40    6.40
   3   4   2   20.50    7.30
   3   4   2   10.60    7.50
   3   4   2   15.30    7.30
   3   4   2    9.50    5.80
  -4  -4  -2  238.78   18.40
  -4  -4  -2  256.77   24.40
  -4  -4  -2  265.97   19.20
  -4  -4  -2  258.57   21.30
  -4  -4  -2  265.27   22.10
  -4  -4  -2  251.27   19.50
   4   4   2  268.27   38.70
   4   4   2  293.87   22.10
   4   4   2  302.67   26.50
   4   4   2  251.37   23.70
   4   4   2  267.67   22.40
   4   4   2  281.47   20.40
  -5  -4  -2  226.58   20.00
  -5  -4  -2  255.47   38.30
  -5  -4  -2  233.18   25.90
  -5  -4  -2  233.48   20.40
  -5  -4  -2  265.47   22.00
  -5  -4  -2  261.37   23.50
  -5  -4  -2  231.38   18.40
   5   4   2  240.18   24.90
   5   4   2  204.88   23.10
   5   4   2  235.18   25.20
  -6  -4  -2  418.36   24.80
  -6  -4  -2  268.37   46.00
  -6  -4  -2  411.66   27.80
  -6  -4  -2  428.16   29.80
  -6  -4  -2  375.96   27.20
  -6  -4  -2  422.36   29.60
   6   4   2  391.26   29.70
   6   4   2  305.17   30.10
   6   4   2  352.06   31.80
  -7  -4  -2   63.79   13.90
  -7  -4  -2   85.39   13.20
  -7  -4  -2   62.99   10.30
  -7  -4  -2   69.89   15.30
   7   4   2   87.89   14.90
   7   4   2   89.49   14.10
   4  -5  -2  166.48   15.70
   4  -5  -2  164.88   14.80
  -4   5   2  195.98   14.50
   3  -5  -2  297.37   23.80
   3  -5  -2  297.27   24.50
   3  -5  -2  318.77   24.80
  -3   5   2  336.77   21.80
  -3   5   2  297.07   31.20
  -3   5   2  287.57   22.00
   2  -5  -2   71.39   13.70
   2  -5  -2   91.99   22.40
   2  -5  -2   74.09   14.00
   2  -5  -2   77.29   13.20
   2  -5  -2   83.29   14.20
  -2   5   2  134.79   24.50
  -2   5   2  122.29   15.30
  -2   5   2  112.59   18.60
  -2   5   2  119.79   21.30
  -2   5   2   95.49   17.90
   1  -5  -2  718.73   43.90
   1  -5  -2  771.62   41.10
   1  -5  -2  760.32   44.00
   1  -5  -2  823.72   45.60
   1  -5  -2  750.12   44.70
   1  -5  -2  740.03   40.10
   1  -5  -2  759.42   43.80
  -1   5   2  747.03   44.30
  -1   5   2  778.22   39.40
  -1   5   2  736.03   42.70
  -1   5   2  678.33   44.10
  -1   5   2  766.42   39.40
  -1   5   2  686.13   45.60
   0  -5  -2    4.60    9.00
   0  -5  -2    9.70   11.50
   0  -5  -2  -10.60   15.20
   0  -5  -2  -13.40    9.80
   0  -5  -2    8.40   14.10
   0   5   2    4.20    8.00
   0   5   2   -5.50    7.50
   0   5   2    2.30    7.20
   0   5   2   -6.60   11.40
   0   5   2    4.10    5.80
  -1  -5  -2   13.50    7.20
   1   5   2   26.80    8.10
   1   5   2   32.60    7.80
   1   5   2   16.40   11.80
   1   5   2   30.10    7.00
   1   5   2   21.90    7.80
  -2  -5  -2  399.46   27.20
  -2  -5  -2  432.96   25.10
  -2  -5  -2  418.76   24.40
  -2  -5  -2  445.86   25.60
   2   5   2  439.96   25.70
   2   5   2  468.75   28.20
   2   5   2  438.86   25.30
   2   5   2  442.46   26.70
  -3  -5  -2  177.28   17.70
  -3  -5  -2  169.18   18.00
  -3  -5  -2  157.58   23.80
  -3  -5  -2  158.68   15.10
   3   5   2  166.98   21.60
   3   5   2  183.18   16.90
   3   5   2  190.08   18.00
   3   5   2  183.08   16.10
  -4  -5  -2  469.05   29.80
  -4  -5  -2  434.46   29.60
  -4  -5  -2  514.05   31.80
  -4  -5  -2  517.75   36.30
  -4  -5  -2  497.35   33.80
  -4  -5  -2  452.45   31.30
   4   5   2  524.45   30.00
   4   5   2  590.84   33.40
   4   5   2  507.35   32.10
   4   5   2  441.06   47.00
   4   5   2  593.44   34.50
   4   5   2  539.95   40.00
  -5  -5  -2  247.38   30.60
  -5  -5  -2  270.77   23.20
  -5  -5  -2  242.38   20.60
  -5  -5  -2  258.87   23.00
  -5  -5  -2  278.87   22.50
   5   5   2  245.48   26.60
   5   5   2  210.18   44.00
   5   5   2  257.77   25.40
   5   5   2  228.38   23.00
   5   5   2  200.08   26.20
  -6  -5  -2  445.86   31.60
  -6  -5  -2  461.55   27.30
  -6  -5  -2  410.46   38.20
  -6  -5  -2  454.65   32.10
  -6  -5  -2  452.05   28.80
   6   5   2  397.76   31.00
   6   5   2  440.46   32.20
   6   5   2  410.06   31.50
   6   5   2  441.76   36.10
  -7  -5  -2   55.59    9.00
  -7  -5  -2   56.89   12.80
  -7  -5  -2   79.29   21.20
   7   5   2   50.99   13.20
   7   5   2   82.99   14.00
   3  -6  -2  264.07   19.10
   3  -6  -2  272.57   18.40
  -3   6   2  256.87   17.80
   2  -6  -2   54.69   10.30
   2  -6  -2   45.00   12.00
   2  -6  -2   20.40   12.90
  -2   6   2   34.90    9.80
  -2   6   2   54.19   15.70
  -2   6   2   41.40    8.80
   1  -6  -2  161.88   19.60
   1  -6  -2  170.98   19.90
   1  -6  -2  169.48   22.30
   1  -6  -2  147.39   26.00
  -1   6   2  131.69   16.20
  -1   6   2  132.39   16.00
  -1   6   2  149.49   25.20
   0  -6  -2    4.60    8.90
   0  -6  -2   13.40   14.00
   0  -6  -2   15.60   10.30
   0  -6  -2   -1.90   12.90
   0  -6  -2   -4.10    8.90
   0  -6  -2   16.80   16.50
   0   6   2   -9.70   13.80
   0   6   2    4.40   12.50
   0   6   2   16.70    8.30
   0   6   2   24.30    8.40
  -1  -6  -2 1156.18   60.39
  -1  -6  -2 1070.19   61.89
  -1  -6  -2 1183.98   58.49
   1   6   2 1139.19   60.39
   1   6   2 1199.48   61.69
   1   6   2 1209.18   57.09
   1   6   2 1212.58   62.89
   1   6   2 1235.78   57.69
  -2  -6  -2  369.66   28.50
  -2  -6  -2  319.07   34.90
   2   6   2  425.46   29.40
   2   6   2  439.26   25.40
   2   6   2  365.86   24.70
   2   6   2  370.76   30.40
   2   6   2  426.36   29.50
  -3  -6  -2  130.69   22.10
  -3  -6  -2  164.98   28.20
  -3  -6  -2  155.98   18.90
  -3  -6  -2  173.28   25.20
  -3  -6  -2  159.98   22.00
   3   6   2  203.68   20.90
   3   6   2  189.78   17.70
   3   6   2  180.98   20.80
   3   6   2  177.48   21.50
  -4  -6  -2  303.97   25.30
  -4  -6  -2  303.07   25.60
  -4  -6  -2  300.47   27.10
  -4  -6  -2  280.37   23.60
   4   6   2  308.47   27.30
   4   6   2  268.57   35.30
   4   6   2  288.17   22.50
   4   6   2  295.97   25.50
   4   6   2  314.27   26.00
   4   6   2  298.47   27.20
  -5  -6  -2  275.17   23.90
  -5  -6  -2  303.27   27.20
  -5  -6  -2  299.27   25.50
  -5  -6  -2  271.97   24.70
   5   6   2  260.27   23.30
   5   6   2  279.07   29.00
   5   6   2  249.18   28.50
   5   6   2  263.67   30.20
  -6  -6  -2   81.09   15.50
  -6  -6  -2   73.19   10.80
  -6  -6  -2   56.89   13.90
  -6  -6  -2   55.79   13.80
   6   6   2   62.29   17.30
   6   6   2   77.59   12.80
   6   6   2   76.39   13.80
  -7  -6  -2   -1.90   13.10
  -7  -6  -2   -6.80   11.10
  -7  -6  -2    0.10    5.80
   7   6   2    0.60    7.00
   7   6   2   16.70   14.40
   2  -7  -2   16.30    8.00
   2  -7  -2   11.40    5.40
  -2   7   2    3.30    6.20
   1  -7  -2   59.89   11.70
   1  -7  -2   34.30    9.30
  -1   7   2   60.29   11.00
  -1   7   2   57.79    9.60
  -1   7   2   56.89   14.50
   0  -7  -2   48.90   13.10
   0  -7  -2   40.50    8.80
   0  -7  -2   25.40    9.20
   0   7   2   40.60   13.40
   0   7   2   31.80   15.10
   0   7   2   29.90    8.40
   0   7   2   53.09   11.00
  -1  -7  -2  177.48   18.30
  -1  -7  -2  198.18   17.90
  -1  -7  -2  173.28   25.00
  -1  -7  -2  198.68   21.70
   1   7   2  181.38   17.30
   1   7   2  159.08   23.30
   1   7   2  176.98   26.30
  -2  -7  -2  132.39   16.60
  -2  -7  -2  126.79   17.50
  -2  -7  -2   91.49   18.50
  -2  -7  -2  123.69   19.40
   2   7   2  134.09   21.30
   2   7   2  190.48   29.70
   2   7   2  147.09   15.60
   2   7   2  143.49   23.10
   2   7   2  119.19   16.40
  -3  -7  -2  104.79   17.50
   3   7   2   79.99   18.80
   3   7   2  121.89   19.60
   3   7   2  125.89   15.30
   3   7   2  126.99   19.00
   3   7   2  123.69   17.40
  -5  -7  -2  137.39   23.60
  -5  -7  -2  139.89   18.80
  -5  -7  -2  125.99   19.10
  -5  -7  -2   96.79   13.80
  -5  -7  -2   91.99   17.20
   5   7   2  140.59   16.80
   5   7   2  164.38   25.60
   5   7   2  137.09   25.50
  -6  -7  -2   39.80    9.20
  -6  -7  -2   41.90   10.50
  -6  -7  -2   40.30   13.30
   6   7   2   35.20    9.10
   6   7   2   54.09   12.00
  -7  -7  -2  241.18   16.60
  -7  -7  -2  236.98   20.20
   7   7   2  264.77   19.30
   0  -8  -2  266.37   17.80
   0  -8  -2  266.77   20.10
   0  -8  -2  270.87   24.70
   0   8   2  295.37   21.10
   0   8   2  297.27   18.80
   0   8   2  238.88   22.90
  -1  -8  -2   30.00   15.10
  -1  -8  -2   37.50    8.00
  -1  -8  -2   36.20   11.00
   1   8   2   41.30   10.90
   1   8   2   54.29    9.10
   1   8   2   52.19   11.20
  -2  -8  -2  153.88   14.70
  -2  -8  -2  125.89   14.80
   2   8   2  137.09   18.30
   2   8   2  142.19   18.60
   2   8   2  140.99   26.50
  -3  -8  -2  121.39   15.50
  -3  -8  -2  134.49   14.20
   3   8   2  145.39   20.70
   3   8   2  154.58   18.10
   3   8   2  147.29   16.10
  -4  -8  -2   53.49    9.30
   4   8   2   44.90   10.20
   4   8   2   40.10   16.00
   4   8   2   63.49   16.80
   4   8   2   27.30    8.80
  -5  -8  -2   33.40    8.40
  -5  -8  -2   32.80    9.90
   5   8   2   10.40   16.90
   5   8   2   19.60    7.50
  -6  -8  -2   34.60   11.50
  -6  -8  -2   43.60    8.10
   6   8   2   27.20   11.20
   6   8   2   40.50    7.80
   6   8   2   25.20   11.60
  -2  -9  -2   90.09    9.20
   2   9   2   60.99    8.90
  -3  -9  -2   70.49    9.90
  -3  -9  -2  106.49   10.00
   3   9   2   85.89   12.90
   3   9   2   78.69   12.80
  -4  -9  -2   47.80    7.10
  -4  -9  -2   42.70    6.90
   4   9   2   49.10    8.20
   5   8  -3   16.50    7.40
   5   8  -3    8.60    9.90
  -5  -8   3   10.70    8.30
  -5  -8   3   19.30    6.60
   4   8  -3   19.30   11.50
   4   8  -3   25.70    7.70
   4   8  -3   13.60    8.40
  -4  -8   3   11.40    6.60
  -4  -8   3   11.10   10.30
  -4  -8   3   19.50    7.70
   3   8  -3  110.59   14.30
   3   8  -3  140.99   17.90
   3   8  -3  154.58   18.50
   3   8  -3  121.29   22.30
  -3  -8   3  168.78   15.10
  -3  -8   3  139.49   13.70
   2   8  -3   33.60   21.00
   2   8  -3   71.49   11.70
   2   8  -3   56.99   13.30
   2   8  -3   90.29   13.30
  -2  -8   3   62.89   14.90
  -2  -8   3   78.99   10.40
   1   8  -3  214.48   17.90
  -1  -8   3  156.78   18.90
  -1  -8   3  218.98   16.10
  -1  -8   3  205.68   29.10
   0  -8   3    5.50    5.80
   0  -8   3    1.00    6.70
   0  -8   3    9.50   14.20
   6   7  -3  135.49   23.90
   6   7  -3  121.69   13.60
  -6  -7   3  131.19   14.60
  -6  -7   3  136.39   15.00
   5   7  -3  114.99   16.90
   5   7  -3  105.09   25.10
   5   7  -3  147.39   22.10
   5   7  -3  149.79   17.30
  -5  -7   3  120.29   16.30
  -5  -7   3   88.69   17.60
  -5  -7   3  156.28   22.40
  -5  -7   3  126.29   17.20
   4   7  -3   10.30   14.60
   4   7  -3   14.20    7.70
   4   7  -3   10.30    8.70
   4   7  -3    8.60   10.40
  -4  -7   3   25.10    9.30
  -4  -7   3   17.20    9.80
  -4  -7   3    8.30   11.30
   3   7  -3  622.64   35.30
   3   7  -3  618.44   36.40
   3   7  -3  620.14   39.20
  -3  -7   3  668.73   35.50
  -3  -7   3  670.23   36.80
  -3  -7   3  660.93   40.40
   2   7  -3   55.19   16.10
   2   7  -3   63.89   11.20
  -2  -7   3   90.59   19.70
  -2  -7   3   72.29   11.30
  -2  -7   3   46.20   15.30
  -2  -7   3   60.19   10.70
   1   7  -3  150.68   20.40
   1   7  -3  189.38   17.50
   1   7  -3  192.08   26.70
   1   7  -3  195.18   17.30
  -1  -7   3  201.48   18.00
  -1  -7   3  180.48   21.20
  -1  -7   3  183.18   25.10
   0   7  -3  164.08   16.20
   0   7  -3  133.49   16.20
   0   7  -3  153.58   22.30
   0  -7   3  136.19   18.90
   0  -7   3  143.69   15.90
   0  -7   3  160.98   18.70
  -1   7  -3   48.20    9.40
   1  -7   3   53.69    9.30
   1  -7   3   33.10    9.20
   1  -7   3   53.49    9.50
   7   6  -3    3.60    7.40
  -7  -6   3   10.00    7.60
  -7  -6   3    4.40    8.00
   6   6  -3   62.09   10.60
   6   6  -3   51.59   17.50
   6   6  -3   59.89   14.10
  -6  -6   3   77.09   11.10
  -6  -6   3   72.59   15.40
  -6  -6   3   77.99   14.40
  -6  -6   3   59.79   11.50
   5   6  -3  528.95   41.70
   5   6  -3  523.65   31.10
   5   6  -3  516.75   32.90
   5   6  -3  524.75   38.60
  -5  -6   3  560.14   35.00
  -5  -6   3  503.85   32.80
  -5  -6   3  516.95   35.10
  -5  -6   3  517.35   34.30
   4   6  -3   68.29   18.30
   4   6  -3   78.39   16.30
   4   6  -3   60.59   10.20
   4   6  -3   71.49   12.50
   4   6  -3   65.39   13.20
  -4  -6   3   61.69   13.70
  -4  -6   3   79.39   18.10
  -4  -6   3   59.09   12.40
  -4  -6   3   84.09   15.20
  -4  -6   3   41.90   12.70
   3   6  -3  982.60   52.09
   3   6  -3 1004.40   46.40
   3   6  -3  886.31   50.29
   3   6  -3  975.80   47.10
  -3  -6   3  923.31   50.59
  -3  -6   3  904.91   48.10
  -3  -6   3  880.71   49.60
  -3  -6   3  808.72   50.69
  -3  -6   3  829.02   45.90
  -3  -6   3  817.62   46.90
   2   6  -3   52.69    9.80
   2   6  -3   61.69   12.50
   2   6  -3   54.19    9.60
   2   6  -3   36.20   14.60
   2   6  -3   61.99   16.20
  -2  -6   3   42.20   14.90
  -2  -6   3   48.50   16.30
  -2  -6   3   34.80   15.20
  -2  -6   3   34.00   10.60
  -2  -6   3   37.90    9.90
   1   6  -3    0.90   14.10
   1   6  -3   26.60   19.50
   1   6  -3   17.30   10.80
   1   6  -3   26.10    9.10
  -1  -6   3   18.00    9.90
  -1  -6   3   43.90   16.70
  -1  -6   3   27.30   13.50
  -1  -6   3   26.70   12.20
  -1  -6   3   12.30    8.60
   0   6  -3  147.39   15.30
   0   6  -3  165.78   22.90
   0   6  -3  106.49   21.20
   0   6  -3  130.19   16.90
   0  -6   3  179.28   22.20
   0  -6   3  173.38   17.70
   0  -6   3  163.38   20.60
   0  -6   3  171.88   27.60
  -1   6  -3  162.18   16.00
  -1   6  -3  145.99   25.30
  -1   6  -3  154.18   18.20
   1  -6   3  144.19   19.10
   1  -6   3  115.89   18.60
   1  -6   3  152.38   22.30
  -2   6  -3   86.09   20.50
  -2   6  -3  151.18   17.80
  -2   6  -3  114.39   15.50
   2  -6   3  141.59   19.30
   2  -6   3  131.19   16.20
   2  -6   3  124.29   16.20
   3  -6   3    6.90    6.00
   3  -6   3   10.40    9.70
   3  -6   3   10.50    6.50
   7   5  -3   51.39    9.20
  -7  -5   3   43.20   11.80
  -7  -5   3   39.70   12.30
  -7  -5   3   42.20    7.60
   6   5  -3  137.99   26.90
   6   5  -3  187.78   23.70
   6   5  -3  153.08   18.40
  -6  -5   3  188.08   22.30
  -6  -5   3  201.28   24.50
  -6  -5   3  189.48   21.80
  -6  -5   3  183.28   18.30
   5   5  -3   66.79   12.70
  -5  -5   3   25.30   10.70
  -5  -5   3   48.50   13.50
  -5  -5   3   37.50   11.30
  -5  -5   3   36.30   10.40
   4   5  -3  941.51   48.60
   4   5  -3  918.71   46.40
   4   5  -3  914.61   49.40
   4   5  -3  919.41   50.59
   4   5  -3  834.52   52.09
   4   5  -3  878.71   45.10
   4   5  -3  895.51   58.39
  -4  -5   3  914.11   50.29
  -4  -5   3  857.01   47.60
  -4  -5   3  888.51   51.59
  -4  -5   3  893.41   48.80
  -4  -5   3  932.61   47.50
   3   5  -3  566.54   31.50
   3   5  -3  601.14   35.10
   3   5  -3  560.14   34.20
   3   5  -3  582.14   29.90
   3   5  -3  580.44   30.30
  -3  -5   3  451.75   31.20
  -3  -5   3  487.05   31.80
  -3  -5   3  482.95   33.40
  -3  -5   3  538.65   32.90
  -3  -5   3  501.15   34.30
  -3  -5   3  496.95   30.20
   2   5  -3  152.58   16.70
   2   5  -3  169.98   14.70
   2   5  -3  145.69   15.70
   2   5  -3  163.18   13.60
  -2  -5   3  162.08   16.70
  -2  -5   3  133.79   17.60
  -2  -5   3  155.18   24.90
  -2  -5   3  142.69   19.90
  -2  -5   3  143.89   14.80
  -2  -5   3  140.59   18.30
   1   5  -3  329.87   19.00
   1   5  -3  321.87   23.20
   1   5  -3  303.97   21.20
   1   5  -3  289.27   20.20
  -1  -5   3  277.57   22.70
  -1  -5   3  292.97   21.90
  -1  -5   3  286.07   26.30
   0   5  -3  374.66   22.30
   0   5  -3  412.06   26.60
   0   5  -3  365.06   25.30
   0  -5   3  393.66   26.70
   0  -5   3  412.36   34.00
   0  -5   3  379.66   31.20
   0  -5   3  360.66   29.50
   0  -5   3  413.26   29.30
   0  -5   3  399.36   27.50
  -1   5  -3 1032.50   47.40
  -1   5  -3  981.70   53.09
   1  -5   3  936.01   53.69
   1  -5   3  941.21   53.79
   1  -5   3 1022.20   54.09
   1  -5   3  993.10   54.49
   1  -5   3 1036.10   53.99
   1  -5   3  979.80   49.70
   1  -5   3  942.71   56.29
  -2   5  -3    3.10   11.00
  -2   5  -3  -10.40   19.00
  -2   5  -3    4.80    7.80
   2  -5   3   -1.30   10.00
   2  -5   3    5.70   11.60
   2  -5   3    0.00    9.10
   2  -5   3    3.90   12.10
   2  -5   3    4.20    9.90
   2  -5   3   18.50   16.90
  -3   5  -3   73.39   12.40
  -3   5  -3   60.99   10.70
   3  -5   3   60.59   11.30
   3  -5   3   35.30    8.60
   3  -5   3   51.89   10.80
   3  -5   3   40.70    9.70
   4  -5   3   67.69   11.10
   4  -5   3   67.69    9.40
   4  -5   3   51.49    9.10
   7   4  -3  207.08   17.60
  -7  -4   3  161.08   21.10
  -7  -4   3  189.18   23.20
  -7  -4   3  192.58   15.80
   6   4  -3  198.98   22.10
   6   4  -3  209.68   23.90
   6   4  -3  167.48   25.60
  -6  -4   3  215.88   19.70
  -6  -4   3  194.28   28.80
  -6  -4   3  224.58   23.40
  -6  -4   3  252.87   23.80
   5   4  -3  226.48   22.60
   5   4  -3  230.08   27.70
  -5  -4   3  173.18   20.60
  -5  -4   3  186.18   27.70
  -5  -4   3  184.08   19.90
  -5  -4   3  176.78   19.40
   4   4  -3 1659.23   78.19
   4   4  -3 1671.63   80.99
   4   4  -3 1701.63   86.99
   4   4  -3 1659.53   79.09
   4   4  -3 1629.64   80.29
   4   4  -3 1828.72   83.89
   4   4  -3 1617.44   80.99
  -4  -4   3 1828.22   84.59
  -4  -4   3 1675.53   79.59
  -4  -4   3 1700.23   83.09
  -4  -4   3 1809.62   82.29
  -4  -4   3 1864.21   81.09
   3   4  -3  124.89   15.00
   3   4  -3  117.29   12.60
   3   4  -3  134.89   12.90
   3   4  -3  127.19   14.60
   3   4  -3  131.19   13.60
  -3  -4   3  114.59   12.50
  -3  -4   3  125.59   14.50
  -3  -4   3  118.59   14.60
   2   4  -3  322.07   19.90
   2   4  -3  326.47   19.30
   2   4  -3  322.67   19.10
   2   4  -3  341.77   21.80
  -2  -4   3  342.97   19.80
  -2  -4   3  338.47   21.70
  -2  -4   3  348.27   20.80
  -2  -4   3  324.57   20.90
   1   4  -3  988.10   46.30
   1   4  -3  917.11   42.50
   1   4  -3  948.51   43.40
  -1  -4   3  913.81   43.10
  -1  -4   3  928.91   45.00
  -1  -4   3  896.11   44.70
  -1  -4   3  865.91   45.80
   0   4  -3 1312.87   58.39
   0   4  -3 1193.18   55.79
   0   4  -3 1245.98   55.69
   0  -4   3 1283.77   59.99
   0  -4   3 1256.77   58.69
  -1   4  -3  801.72   40.20
  -1   4  -3  818.42   40.80
  -1   4  -3  698.33   36.10
   1  -4   3  806.82   43.80
   1  -4   3  689.23   39.10
   1  -4   3  795.12   46.00
   1  -4   3  783.52   44.40
   1  -4   3  817.02   42.10
  -2   4  -3  216.98   23.20
  -2   4  -3  197.78   25.40
  -2   4  -3  231.78   26.40
  -2   4  -3  221.48   16.50
   2  -4   3  265.37   24.30
   2  -4   3  256.87   26.30
   2  -4   3  265.37   25.30
   2  -4   3  230.28   24.10
   2  -4   3  241.38   22.70
   2  -4   3  257.37   30.30
   2  -4   3  251.97   26.00
  -3   4  -3  390.66   46.70
  -3   4  -3  463.45   39.20
  -3   4  -3  465.95   36.90
  -3   4  -3  480.75   27.30
   3  -4   3  456.45   36.40
   3  -4   3  495.85   32.70
   3  -4   3  458.45   32.40
   3  -4   3  441.36   31.90
   3  -4   3  485.35   33.90
  -4   4  -3  146.99   16.20
  -4   4  -3  148.19   17.90
   4  -4   3  141.09   17.20
   4  -4   3  103.69   15.60
   4  -4   3  141.09   18.10
   7   3  -3  172.48   16.40
  -7  -3   3  166.98   14.90
   6   3  -3  400.56   29.70
  -6  -3   3  399.26   26.00
  -6  -3   3  398.76   40.80
  -6  -3   3  352.56   29.80
  -6  -3   3  374.46   29.20
  -6  -3   3  354.96   23.70
   5   3  -3  293.57   26.90
   5   3  -3  300.97   29.90
   5   3  -3  265.17   26.20
  -5  -3   3  309.77   28.20
  -5  -3   3  317.77   37.30
  -5  -3   3  361.96   26.40
  -5  -3   3  342.17   25.50
  -5  -3   3  366.56   25.30
  -5  -3   3  353.96   22.40
  -5  -3   3  294.47   24.70
  -5  -3   3  386.26   47.90
   4   3  -3  157.28   16.60
   4   3  -3  167.78   20.80
   4   3  -3  150.18   18.10
   4   3  -3  154.68   17.30
   4   3  -3  181.58   17.80
   4   3  -3  155.08   17.00
  -4  -3   3  124.49   17.40
  -4  -3   3  172.48   15.40
  -4  -3   3  173.88   16.80
  -4  -3   3  137.19   14.60
  -4  -3   3  154.98   19.90
  -4  -3   3  139.99   14.60
  -4  -3   3  149.29   16.60
   3   3  -3  463.45   28.00
   3   3  -3  444.56   25.90
   3   3  -3  497.65   26.80
   3   3  -3  495.75   25.90
   3   3  -3  467.95   25.70
   3   3  -3  475.75   26.30
  -3  -3   3  513.05   26.70
  -3  -3   3  514.05   28.00
  -3  -3   3  511.65   28.20
  -3  -3   3  446.66   26.90
   2   3  -3  221.38   13.10
   2   3  -3  192.48   19.80
   2   3  -3  233.18   14.10
   2   3  -3  223.48   15.30
  -2  -3   3  199.28   13.50
  -2  -3   3  202.18   14.20
  -2  -3   3  190.98   15.10
   1   3  -3  627.44   31.20
   1   3  -3  598.74   28.80
   1   3  -3  584.34   28.90
  -1  -3   3  614.24   29.60
  -1  -3   3  653.13   31.90
  -1  -3   3  658.93   31.00
  -1  -3   3  605.94   31.10
   0   3  -3  341.17   17.60
   0   3  -3  384.06   19.30
   0  -3   3  362.66   20.10
   0  -3   3  369.86   20.60
   0  -3   3  371.86   18.30
  -1   3  -3  893.41   44.80
  -1   3  -3  902.31   41.70
  -1   3  -3  967.90   46.00
   1  -3   3 1040.80   46.00
   1  -3   3 1066.29   47.40
  -2   3  -3   69.39   12.50
  -2   3  -3   52.29    9.20
  -2   3  -3   49.99    9.30
   2  -3   3   47.80    9.10
   2  -3   3   47.20    9.30
  -3   3  -3  669.13   43.10
  -3   3  -3  701.73   36.00
  -3   3  -3  715.13   42.60
   3  -3   3  726.03   44.90
   3  -3   3  738.03   45.30
   3  -3   3  721.03   43.20
   3  -3   3  805.52   43.70
   3  -3   3  738.03   43.30
   3  -3   3  761.92   43.20
   3  -3   3  751.62   42.80
  -4   3  -3  106.09   14.30
  -4   3  -3  115.09   17.80
   4  -3   3   70.09   14.60
   4  -3   3   90.69   15.20
   4  -3   3   71.09   13.60
   4  -3   3  101.69   17.30
   4  -3   3   73.89   12.50
  -5   3  -3   75.09   11.00
  -5   3  -3   84.29   14.30
  -5   3  -3  104.19   18.40
   5  -3   3   84.49   13.90
   5  -3   3  110.19   15.10
   5  -3   3  102.39   13.90
   7   2  -3   12.90    6.60
   7   2  -3   10.10    7.20
  -7  -2   3   -1.80    6.30
  -7  -2   3   15.30    8.20
   6   2  -3  389.16   29.20
  -6  -2   3  391.96   35.20
  -6  -2   3  397.06   34.90
  -6  -2   3  422.16   27.90
  -6  -2   3  425.46   28.70
  -6  -2   3  454.35   25.40
   5   2  -3  201.08   26.20
   5   2  -3  192.28   22.70
   5   2  -3  213.98   22.60
   5   2  -3  209.68   24.20
  -5  -2   3  188.78   29.90
  -5  -2   3  204.48   30.10
  -5  -2   3  225.18   19.70
  -5  -2   3  254.27   23.60
  -5  -2   3  216.38   22.50
  -5  -2   3  235.28   18.00
  -5  -2   3  232.78   21.20
  -5  -2   3  232.38   21.60
   4   2  -3  315.97   23.10
   4   2  -3  273.37   20.10
  -4  -2   3  291.77   19.70
  -4  -2   3  290.97   21.90
  -4  -2   3  309.37   20.50
  -4  -2   3  286.67   19.70
  -4  -2   3  279.57   19.30
  -4  -2   3  287.07   22.40
  -4  -2   3  320.77   25.40
   3   2  -3  719.13   35.70
   3   2  -3  751.62   38.00
   3   2  -3  755.92   35.80
   3   2  -3  709.63   35.40
  -3  -2   3  722.93   35.90
  -3  -2   3  745.43   37.10
  -3  -2   3  755.42   37.50
  -3  -2   3  682.33   34.90
   2   2  -3   12.10    4.50
   2   2  -3    9.70    3.70
   2   2  -3    9.70    4.70
   2   2  -3    6.00    3.00
   2   2  -3   10.30    3.60
  -2  -2   3    7.30    3.40
  -2  -2   3   11.20    5.20
  -2  -2   3    9.90    3.70
   1   2  -3 1870.21   85.29
   1   2  -3 1862.91   83.59
  -1  -2   3 1954.00   86.09
  -1  -2   3 2090.79   85.29
  -1  -2   3 2052.09   84.89
   0   2  -3  365.16   18.00
   0   2  -3  366.76   17.10
   0  -2   3  396.36   19.70
   0  -2   3  388.96   19.60
   0  -2   3  394.86   18.00
  -1   2  -3  896.21   43.40
  -1   2  -3  943.11   42.80
   1  -2   3 1010.50   44.60
   1  -2   3 1030.00   45.30
  -2   2  -3  932.41   42.30
  -2   2  -3  845.22   39.00
   2  -2   3  877.51   42.70
   2  -2   3  825.72   41.50
  -3   2  -3  171.18   13.20
  -3   2  -3  201.98   18.00
   3  -2   3  183.48   22.50
   3  -2   3  185.38   22.30
   3  -2   3  189.48   23.80
   3  -2   3  185.18   17.40
  -4   2  -3    5.90    7.30
  -4   2  -3   11.10    9.80
  -4   2  -3   11.60   13.00
   4  -2   3   21.40   11.50
   4  -2   3   21.00   10.60
   4  -2   3   30.80   12.90
   4  -2   3   27.20   14.40
   4  -2   3   14.30   13.30
   4  -2   3   11.60   14.80
  -5   2  -3  158.58   17.20
  -5   2  -3  144.49   17.40
   5  -2   3  182.18   19.00
   5  -2   3  217.08   20.80
   5  -2   3  184.48   21.00
  -6   2  -3   92.59   12.90
   6  -2   3  115.09   13.60
   6  -2   3  102.19   13.50
   6  -2   3  133.79   13.30
   7   1  -3   60.39    9.80
   7   1  -3   62.89   11.40
  -7  -1   3   93.39   11.30
  -7  -1   3   74.49   12.00
   6   1  -3  159.68   18.90
  -6  -1   3  213.38   20.00
  -6  -1   3  176.18   20.60
  -6  -1   3  194.78   19.60
  -6  -1   3  176.48   15.60
   5   1  -3   15.20   11.30
   5   1  -3   17.20   12.90
  -5  -1   3    3.00    8.20
  -5  -1   3    3.50    9.80
  -5  -1   3    3.10   12.40
  -5  -1   3    9.70   12.60
  -5  -1   3   17.10    7.20
  -5  -1   3   12.50   12.80
   4   1  -3  339.07   28.10
   4   1  -3  343.07   24.40
  -4  -1   3  370.66   21.10
  -4  -1   3  310.07   20.40
  -4  -1   3  335.87   21.70
  -4  -1   3  297.87   25.50
  -4  -1   3  311.77   21.80
  -4  -1   3  276.87   23.10
  -4  -1   3  316.97   23.40
   3   1  -3   24.40    6.70
   3   1  -3   25.60    5.30
   3   1  -3   29.40    5.90
  -3  -1   3   31.60    6.20
  -3  -1   3   34.20    6.00
  -3  -1   3   29.80    6.00
  -3  -1   3   29.80    6.30
  -3  -1   3   22.60    7.20
  -3  -1   3   26.10    6.50
   2   1  -3 2974.80  125.29
   2   1  -3 2944.51  123.99
   2   1  -3 2991.20  124.09
  -2  -1   3 2802.72  124.69
  -2  -1   3 2779.12  123.09
  -2  -1   3 2849.22  123.89
  -2  -1   3 2911.11  124.49
   1   1  -3 4250.57  177.08
   1   1  -3 4276.37  176.98
   1   1  -3 4120.99  176.88
  -1  -1   3 4050.49  175.28
  -1  -1   3 4187.28  176.68
  -1  -1   3 4246.98  176.98
   0  -1   3  110.89    7.10
   0  -1   3  114.79    7.30
   0  -1   3  104.19    6.30
   1  -1   3 1026.70   45.80
   1  -1   3 1020.10   45.50
  -2   1  -3   36.10    5.70
  -2   1  -3   42.60    7.30
  -2   1  -3   38.40    4.40
  -2   1  -3   44.90    6.00
   2  -1   3   38.30    6.50
   2  -1   3   35.10    6.50
  -3   1  -3  407.86   22.70
  -3   1  -3  387.56   22.40
  -3   1  -3  412.76   21.10
   3  -1   3  402.06   23.80
  -4   1  -3  521.05   26.70
  -4   1  -3  465.25   28.10
  -4   1  -3  499.65   32.30
   4  -1   3  464.75   33.40
   4  -1   3  501.85   34.00
   4  -1   3  447.56   32.20
   4  -1   3  473.75   31.10
   4  -1   3  465.25   32.90
  -5   1  -3  151.28   15.60
  -5   1  -3  154.98   16.90
   5  -1   3  147.39   20.80
   5  -1   3  151.08   20.60
   5  -1   3  122.09   18.30
   5  -1   3  155.88   21.30
   5  -1   3  113.39   20.40
  -6   1  -3  190.58   17.70
  -6   1  -3  194.48   16.60
   6  -1   3  179.88   18.70
   6  -1   3  175.98   19.30
   6  -1   3  179.08   18.10
   6   0  -3  169.58   16.50
   6   0  -3  174.98   18.30
  -6   0   3  137.89   18.80
  -6   0   3  159.28   15.40
  -6   0   3  182.58   18.50
  -6   0   3  177.28   18.70
   5   0  -3   85.69   20.80
   5   0  -3  123.19   20.10
   5   0  -3  134.09   20.20
   5   0  -3  105.19   19.40
  -5   0   3  125.19   14.00
  -5   0   3  110.79   15.30
  -5   0   3  110.59   18.80
  -5   0   3  115.19   15.90
   4   0  -3  236.28   20.30
   4   0  -3  201.18   24.10
  -4   0   3  245.58   19.80
  -4   0   3  213.38   23.40
  -4   0   3  194.78   18.60
  -4   0   3  214.08   22.20
  -4   0   3  237.28   17.00
  -4   0   3  224.48   17.30
   3   0  -3 1646.94   71.49
   3   0  -3 1603.74   69.29
   3   0  -3 1550.34   68.29
  -3   0   3 1578.84   68.99
  -3   0   3 1476.95   68.69
  -3   0   3 1517.45   68.79
  -3   0   3 1557.64   70.39
  -3   0   3 1398.56   69.59
  -3   0   3 1544.95   69.49
   2   0  -3 1795.82   73.39
   2   0  -3 1731.53   71.59
   2   0  -3 1775.12   71.29
  -2   0   3 1580.44   71.19
  -2   0   3 1537.65   71.29
  -2   0   3 1500.05   70.69
  -2   0   3 1473.45   70.59
   1   0  -3  324.27   16.20
   1   0  -3  337.07   16.30
   1   0  -3  335.07   16.90
  -1   0   3  315.97   15.80
  -1   0   3  312.27   15.70
   0   0  -3 3631.34  146.49
   0   0  -3 3573.24  146.39
   0   0   3 3446.76  146.49
   0   0   3 3471.15  146.19
   0   0   3 3413.66  144.99
   0   0   3 3309.07  145.69
  -1   0  -3 6045.90  256.97
  -1   0  -3 6395.66  257.27
  -1   0  -3 6245.97  258.17
   1   0   3 6077.69  257.27
   1   0   3 6207.18  258.57
   1   0   3 6043.50  257.57
   1   0   3 6062.99  257.37
  -2   0  -3  737.33   35.20
   2   0   3  748.03   34.70
   2   0   3  780.52   34.30
   2   0   3  770.72   35.80
  -3   0  -3  248.78   15.50
  -3   0  -3  232.88   14.80
  -3   0  -3  210.88   13.60
  -3   0  -3  213.48   16.90
   3   0   3  185.58   13.90
  -4   0  -3  467.85   23.90
  -4   0  -3  401.96   27.30
  -4   0  -3  398.16   24.70
  -4   0  -3  446.76   27.00
  -4   0  -3  428.16   25.40
   4   0   3  441.06   30.80
   4   0   3  396.96   25.90
   4   0   3  392.46   32.30
   4   0   3  399.36   29.70
  -5   0  -3  681.33   36.10
  -5   0  -3  668.43   35.90
  -5   0  -3  751.12   43.90
  -5   0  -3  633.84   44.60
   5   0   3  664.53   36.70
   5   0   3  666.13   40.30
   5   0   3  649.04   41.10
   5   0   3  694.93   40.50
   5   0   3  665.53   41.70
   5   0   3  656.83   41.10
  -6   0  -3   40.00    9.00
  -6   0  -3   33.80   14.60
  -6   0  -3   33.40    9.50
   6   0   3   42.20   10.90
   6   0   3   35.90   11.10
   6   0   3   26.40   10.40
  -7   0  -3   68.39    9.90
   7   0   3   49.30    8.80
   7   0   3   52.49   11.00
   7   0   3   61.79    9.70
   6  -1  -3  151.38   15.70
  -6   1   3  130.99   16.70
  -6   1   3  142.39   13.50
  -6   1   3  147.89   16.60
  -6   1   3  146.19   19.60
   5  -1  -3  183.38   21.60
   5  -1  -3  194.88   26.70
   5  -1  -3  172.88   19.30
   5  -1  -3  180.48   23.00
  -5   1   3  182.78   20.30
  -5   1   3  177.68   16.30
  -5   1   3  206.98   22.20
  -5   1   3  188.28   17.90
   4  -1  -3  198.88   21.50
   4  -1  -3  217.48   25.70
   4  -1  -3  221.48   22.80
   4  -1  -3  204.38   30.20
  -4   1   3  208.48   17.00
  -4   1   3  209.48   17.10
  -4   1   3  204.58   24.60
  -4   1   3  197.58   21.50
   3  -1  -3  632.24   34.10
   3  -1  -3  649.43   35.80
   3  -1  -3  620.24   33.10
  -3   1   3  697.73   35.80
  -3   1   3  675.83   33.50
  -3   1   3  717.33   33.60
   2  -1  -3  124.49   10.10
   2  -1  -3  127.99   10.70
   2  -1  -3  126.99   10.20
  -2   1   3  133.39   10.30
  -2   1   3  152.28   10.90
  -2   1   3  121.09    9.90
   1  -1  -3 1121.09   47.20
   1  -1  -3 1059.49   47.40
   1  -1  -3  954.70   45.80
   1  -1  -3 1003.80   47.10
  -1   1   3 1142.29   47.50
   0  -1  -3  115.19    6.40
   0  -1  -3  116.09    7.50
   0  -1  -3  121.89    7.60
   0   1   3  114.19    6.90
   0   1   3  116.49    6.10
   0   1   3  115.49    7.40
   0   1   3  117.89    8.70
  -1  -1  -3  280.27   13.70
  -1  -1  -3  308.47   14.10
  -1  -1  -3  276.37   14.30
   1   1   3  293.27   15.00
   1   1   3  282.27   14.10
   1   1   3  269.97   14.10
   1   1   3  300.27   14.60
   1   1   3  296.37   14.60
  -2  -1  -3  921.31   41.90
  -2  -1  -3  889.41   42.20
   2   1   3  932.51   41.90
   2   1   3  898.31   41.70
   2   1   3  978.10   42.40
   2   1   3  917.31   39.50
  -3  -1  -3   57.99    7.90
  -3  -1  -3   52.69    9.00
  -3  -1  -3   44.80    7.80
  -3  -1  -3   45.60    7.40
  -4  -1  -3  315.17   23.30
  -4  -1  -3  327.37   21.30
  -4  -1  -3  336.57   23.20
  -4  -1  -3  356.36   20.60
  -4  -1  -3  358.06   21.90
   4   1   3  365.96   23.70
   4   1   3  359.86   22.30
  -5  -1  -3  658.33   33.40
  -5  -1  -3  594.44   41.70
  -5  -1  -3  623.84   33.10
  -5  -1  -3  656.83   36.30
  -5  -1  -3  613.94   37.60
  -5  -1  -3  578.94   39.30
   5   1   3  588.94   37.10
   5   1   3  548.75   38.00
   5   1   3  561.34   35.60
   5   1   3  562.34   36.30
   5   1   3  591.94   39.30
  -6  -1  -3  116.59   16.10
  -6  -1  -3  106.99   14.00
  -6  -1  -3  102.99   15.00
   6   1   3   97.29   14.90
   6   1   3   96.99   15.50
   6   1   3  112.39   19.80
   6   1   3  109.79   16.70
  -7  -1  -3   76.89   11.50
  -7  -1  -3   93.09   15.50
  -7  -1  -3   89.39   11.80
   7   1   3   84.29   14.90
   7   1   3   45.10   15.30
   7   1   3   68.29   11.10
   5  -2  -3   68.99   12.90
   5  -2  -3   57.89    9.30
   5  -2  -3   51.79   14.00
   5  -2  -3   71.19   12.90
  -5   2   3   54.79   10.50
  -5   2   3   60.99   12.60
  -5   2   3   71.69   10.30
  -5   2   3   68.29   13.60
   4  -2  -3  395.06   33.40
   4  -2  -3  433.16   29.70
   4  -2  -3  431.16   34.40
   4  -2  -3  461.95   32.60
   4  -2  -3  472.45   32.50
   4  -2  -3  410.66   34.20
  -4   2   3  423.36   33.40
  -4   2   3  441.96   33.10
  -4   2   3  507.45   31.20
  -4   2   3  469.05   34.60
  -4   2   3  459.45   26.90
  -4   2   3  466.35   27.80
   3  -2  -3  528.75   34.40
   3  -2  -3  467.25   32.70
   3  -2  -3  484.05   35.20
   3  -2  -3  515.25   34.20
   3  -2  -3  454.05   36.60
   3  -2  -3  489.65   30.50
   3  -2  -3  482.05   31.20
  -3   2   3  544.85   31.70
  -3   2   3  534.95   27.80
  -3   2   3  445.16   36.60
  -3   2   3  566.34   28.20
   2  -2  -3  829.12   40.90
   2  -2  -3  842.42   40.20
   2  -2  -3  818.42   40.40
  -2   2   3  836.82   40.80
  -2   2   3  751.52   38.60
  -2   2   3  813.02   38.50
   1  -2  -3 5717.23  251.07
   1  -2  -3 5875.71  250.77
   1  -2  -3 5657.13  250.97
  -1   2   3 5955.00  249.58
  -1   2   3 6085.29  251.17
  -1   2   3 6119.49  251.17
  -1   2   3 6066.39  250.87
   0  -2  -3  574.04   26.50
   0  -2  -3  570.84   27.50
   0  -2  -3  560.64   25.20
   0  -2  -3  554.64   27.60
   0   2   3  584.14   27.30
   0   2   3  584.14   27.20
   0   2   3  564.74   29.00
  -1  -2  -3  757.62   34.10
  -1  -2  -3  759.22   34.60
  -1  -2  -3  769.42   34.40
   1   2   3  756.92   35.90
   1   2   3  717.63   34.30
   1   2   3  739.03   34.30
  -2  -2  -3 1686.13   78.59
  -2  -2  -3 1800.52   79.89
  -2  -2  -3 1780.42   79.29
   2   2   3 1873.61   80.89
   2   2   3 1845.12   79.49
   2   2   3 1948.91   79.89
   2   2   3 1792.52   79.59
  -3  -2  -3 1830.12   84.69
  -3  -2  -3 1804.52   85.79
  -3  -2  -3 1939.31   85.99
  -3  -2  -3 1827.72   83.69
   3   2   3 2024.50   85.59
   3   2   3 2014.40   85.79
   3   2   3 1845.42   81.59
   3   2   3 2053.39   86.79
  -4  -2  -3  467.25   25.20
  -4  -2  -3  464.05   28.20
  -4  -2  -3  455.75   25.60
  -4  -2  -3  473.25   28.20
  -4  -2  -3  469.15   26.50
   4   2   3  461.45   28.50
   4   2   3  458.65   26.10
   4   2   3  445.76   27.70
  -5  -2  -3  124.19   17.70
  -5  -2  -3  102.49   13.10
  -5  -2  -3   99.49   16.90
  -5  -2  -3  112.19   18.50
  -5  -2  -3  104.59   15.00
  -5  -2  -3   93.69   12.80
   5   2   3  120.29   17.50
   5   2   3  121.49   20.20
   5   2   3   95.09   17.90
   5   2   3  111.39   18.30
   5   2   3  106.89   17.60
   5   2   3  138.59   20.40
  -6  -2  -3  262.57   20.20
  -6  -2  -3  246.28   25.80
  -6  -2  -3  235.88   24.50
  -6  -2  -3  237.28   18.60
  -6  -2  -3  232.58   25.60
   6   2   3  245.38   25.90
   6   2   3  196.88   27.00
   6   2   3  235.78   25.20
   6   2   3  246.18   22.50
   6   2   3  247.58   40.70
  -7  -2  -3   98.89   16.00
  -7  -2  -3   86.19   12.60
  -7  -2  -3  102.79   16.10
   7   2   3  121.19   12.90
   7   2   3  110.19   17.50
   7   2   3  103.69   17.10
   5  -3  -3   29.90    8.30
   5  -3  -3   37.50   11.80
  -5   3   3   43.20   13.20
  -5   3   3   48.10   11.50
  -5   3   3   52.19   10.00
  -5   3   3   52.19    8.00
   4  -3  -3  228.48   24.00
   4  -3  -3  243.68   24.60
   4  -3  -3  232.58   22.00
   4  -3  -3  230.68   23.70
   4  -3  -3  222.88   19.90
  -4   3   3  265.27   20.40
  -4   3   3  291.17   26.10
  -4   3   3  277.07   19.80
  -4   3   3  285.47   24.90
   3  -3  -3  141.29   24.80
   3  -3  -3  186.88   20.30
   3  -3  -3  196.78   23.30
   3  -3  -3  204.28   22.60
   3  -3  -3  206.88   23.20
   3  -3  -3  153.88   22.60
  -3   3   3  222.08   20.10
  -3   3   3  148.69   19.90
  -3   3   3  173.58   15.90
  -3   3   3  160.58   21.40
  -3   3   3  194.68   16.90
  -3   3   3  181.68   22.20
   2  -3  -3  558.24   36.00
   2  -3  -3  539.25   35.10
   2  -3  -3  583.74   33.50
   2  -3  -3  571.94   32.70
  -2   3   3  574.34   32.70
  -2   3   3  563.34   30.50
  -2   3   3  607.34   30.30
  -2   3   3  587.84   33.30
  -2   3   3  605.44   33.60
   1  -3  -3 1762.92   81.99
   1  -3  -3 1802.12   82.49
  -1   3   3 1858.21   82.59
  -1   3   3 1812.02   80.39
  -1   3   3 1840.32   81.79
  -1   3   3 1904.61   82.59
  -1   3   3 1751.52   79.99
   0  -3  -3  866.41   40.90
   0  -3  -3  784.02   39.40
   0   3   3  848.62   40.20
   0   3   3  840.32   40.10
   0   3   3  852.71   39.10
   0   3   3  866.11   40.30
  -1  -3  -3 4427.16  183.08
  -1  -3  -3 4193.18  180.88
  -1  -3  -3 4280.07  181.28
  -1  -3  -3 4074.39  181.28
   1   3   3 4279.87  184.98
   1   3   3 4398.96  181.78
   1   3   3 4444.06  182.58
   1   3   3 4167.18  182.48
  -2  -3  -3  820.02   42.40
  -2  -3  -3  849.72   43.10
  -2  -3  -3  854.61   41.90
   2   3   3  988.40   42.90
   2   3   3  911.61   43.30
   2   3   3  916.41   42.70
   2   3   3  994.50   43.30
   2   3   3  952.30   45.30
   2   3   3  921.51   42.10
  -3  -3  -3 3932.21  166.48
  -3  -3  -3 3790.72  165.08
  -3  -3  -3 3938.71  167.68
  -3  -3  -3 3652.33  165.08
  -3  -3  -3 3808.72  167.38
   3   3   3 3902.41  167.48
   3   3   3 3912.21  167.08
   3   3   3 3970.30  169.48
  -4  -3  -3  409.76   27.40
  -4  -3  -3  456.25   25.10
  -4  -3  -3  448.26   26.10
  -4  -3  -3  433.76   27.70
  -4  -3  -3  435.96   24.90
   4   3   3  452.55   27.60
   4   3   3  449.86   29.20
   4   3   3  453.95   26.80
  -5  -3  -3  436.96   33.40
  -5  -3  -3  480.85   31.50
  -5  -3  -3  474.75   29.10
  -5  -3  -3  477.05   27.00
  -5  -3  -3  464.45   30.70
  -5  -3  -3  462.65   27.50
   5   3   3  448.16   31.80
   5   3   3  459.55   33.00
   5   3   3  468.15   31.90
   5   3   3  448.96   30.50
   5   3   3  416.96   40.50
  -6  -3  -3  140.99   20.70
  -6  -3  -3  133.99   20.20
  -6  -3  -3  130.49   16.40
  -6  -3  -3  180.78   20.90
  -6  -3  -3  164.78   15.30
   6   3   3  117.89   20.40
   6   3   3  140.69   23.00
  -7  -3  -3  279.27   21.50
  -7  -3  -3  265.57   19.20
  -7  -3  -3  283.07   22.70
  -7  -3  -3  277.17   29.20
   7   3   3  289.47   20.40
   7   3   3  288.87   23.50
   4  -4  -3  269.27   22.60
   4  -4  -3  321.17   23.40
   4  -4  -3  259.97   22.20
  -4   4   3  296.07   20.10
  -4   4   3  254.57   26.20
  -4   4   3  293.77   21.90
  -4   4   3  300.67   26.10
   3  -4  -3   35.50   12.30
   3  -4  -3   34.80   11.80
   3  -4  -3   19.50   10.20
   3  -4  -3   30.90   19.40
   3  -4  -3   37.80   11.80
   3  -4  -3   24.40    9.20
  -3   4   3   10.50   19.10
  -3   4   3    8.40    7.50
  -3   4   3   25.20   14.00
  -3   4   3   15.20    7.80
  -3   4   3   16.90   16.50
  -3   4   3   23.90   12.10
   2  -4  -3  599.84   38.70
   2  -4  -3  630.34   39.80
   2  -4  -3  575.34   39.10
   2  -4  -3  633.34   40.60
   2  -4  -3  626.54   38.70
   2  -4  -3  587.54   35.60
  -2   4   3  664.93   34.30
  -2   4   3  664.63   39.80
  -2   4   3  684.23   34.50
  -2   4   3  631.54   37.00
  -2   4   3  633.74   39.50
  -2   4   3  595.84   41.10
   1  -4  -3 1285.37   63.49
   1  -4  -3 1313.97   65.09
   1  -4  -3 1209.58   61.49
   1  -4  -3 1263.97   63.39
   1  -4  -3 1243.38   61.79
  -1   4   3 1219.48   60.49
  -1   4   3 1201.18   58.49
  -1   4   3 1304.67   62.29
  -1   4   3 1268.67   58.89
  -1   4   3 1319.67   62.49
   0  -4  -3  366.56   22.00
   0   4   3  371.26   22.20
   0   4   3  374.06   22.10
   0   4   3  301.17   22.10
   0   4   3  340.27   20.20
   0   4   3  343.77   20.90
  -1  -4  -3 2119.99   96.59
  -1  -4  -3 2197.08   97.39
  -1  -4  -3 2230.38   99.59
  -1  -4  -3 2147.89   97.29
   1   4   3 2287.87  110.39
   1   4   3 2376.56  100.99
   1   4   3 2215.88   99.49
   1   4   3 2466.75  100.69
   1   4   3 2379.36   99.39
   1   4   3 2258.17   99.09
  -2  -4  -3  777.42   33.90
  -2  -4  -3  783.72   35.70
   2   4   3  652.53   33.80
   2   4   3  624.84   39.80
   2   4   3  657.73   34.70
   2   4   3  684.33   34.20
   2   4   3  658.33   35.50
   2   4   3  618.14   33.90
  -3  -4  -3 2885.31  124.19
  -3  -4  -3 2835.02  122.69
  -3  -4  -3 2860.71  121.69
  -3  -4  -3 2923.51  124.19
  -3  -4  -3 2710.23  120.99
   3   4   3 2841.52  123.99
   3   4   3 2830.92  124.89
   3   4   3 2778.62  121.59
   3   4   3 2660.93  127.09
   3   4   3 2647.14  121.79
  -4  -4  -3  339.37   23.50
  -4  -4  -3  329.17   21.30
  -4  -4  -3  301.77   20.70
  -4  -4  -3  336.97   21.80
  -4  -4  -3  312.27   24.20
  -4  -4  -3  296.57   26.40
   4   4   3  325.07   28.60
   4   4   3  328.47   26.40
   4   4   3  325.17   24.40
   4   4   3  406.36   31.30
   4   4   3  344.67   23.50
  -5  -4  -3  106.89   14.80
  -5  -4  -3   97.79   14.70
  -5  -4  -3   90.69   15.80
  -5  -4  -3  111.09   15.50
  -5  -4  -3  107.49   24.60
  -5  -4  -3  148.39   22.90
  -5  -4  -3  109.59   13.90
   5   4   3   97.69   18.60
   5   4   3  124.29   16.80
   5   4   3   97.39   18.80
   5   4   3  121.59   21.40
  -6  -4  -3  159.88   20.70
  -6  -4  -3  186.08   21.10
  -6  -4  -3  156.58   16.00
  -6  -4  -3  172.88   19.20
  -6  -4  -3  179.78   19.20
   6   4   3  133.99   20.60
   6   4   3  132.29   24.90
  -7  -4  -3  390.36   24.20
  -7  -4  -3  350.16   30.20
  -7  -4  -3  381.96   28.70
  -7  -4  -3  425.76   26.10
   7   4   3  441.86   28.50
   7   4   3  440.16   26.90
   3  -5  -3   23.40   10.10
   3  -5  -3   37.90   11.20
   3  -5  -3   42.50   10.70
  -3   5   3   29.20    9.60
  -3   5   3   21.00   15.60
  -3   5   3   37.20    9.00
  -3   5   3   39.20   13.90
   2  -5  -3   44.30   12.40
   2  -5  -3   46.00   20.30
   2  -5  -3   61.99   13.00
   2  -5  -3   55.59   10.40
   2  -5  -3   58.09   14.30
  -2   5   3   49.40    9.40
  -2   5   3   58.49   15.20
  -2   5   3   52.79   10.40
  -2   5   3   26.50   18.50
  -2   5   3   40.90   14.30
  -2   5   3   71.69   18.60
   1  -5  -3 1125.19   57.79
   1  -5  -3 1048.80   53.69
   1  -5  -3  995.10   57.69
   1  -5  -3  997.00   57.59
   1  -5  -3 1114.69   53.99
   1  -5  -3 1126.69   58.79
  -1   5   3 1028.00   58.09
  -1   5   3 1058.09   57.59
  -1   5   3 1010.10   57.29
  -1   5   3 1181.48   53.59
  -1   5   3 1156.68   53.59
  -1   5   3 1083.09   55.79
   0  -5  -3  229.38   25.20
   0  -5  -3  218.58   21.20
   0  -5  -3  196.08   23.30
   0  -5  -3  222.18   22.40
   0  -5  -3  216.68   29.50
   0   5   3  225.48   17.20
   0   5   3  257.87   21.20
   0   5   3  174.28   21.00
   0   5   3  237.08   21.20
   0   5   3  243.58   18.20
   0   5   3  219.28   26.20
  -1  -5  -3  894.61   47.20
  -1  -5  -3  911.91   45.00
   1   5   3  796.92   44.20
   1   5   3  906.41   43.20
   1   5   3  840.12   42.90
   1   5   3  867.71   45.50
   1   5   3  883.31   44.70
  -2  -5  -3   82.79   12.10
  -2  -5  -3   78.69   13.10
  -2  -5  -3   76.59   12.60
   2   5   3   61.59   12.20
   2   5   3   70.99   12.10
   2   5   3   73.49   11.90
   2   5   3   64.79   10.10
  -3  -5  -3  452.15   33.40
  -3  -5  -3  456.65   28.80
  -3  -5  -3  466.55   28.30
  -3  -5  -3  482.15   26.70
  -3  -5  -3  436.66   30.80
   3   5   3  426.36   29.70
   3   5   3  405.06   26.10
   3   5   3  410.16   28.40
   3   5   3  451.85   28.20
  -4  -5  -3  497.95   29.90
  -4  -5  -3  484.75   31.90
  -4  -5  -3  486.65   37.20
  -4  -5  -3  465.45   33.60
  -4  -5  -3  498.55   31.50
  -4  -5  -3  459.05   28.50
   4   5   3  500.75   33.10
   4   5   3  526.55   38.30
   4   5   3  509.55   42.50
   4   5   3  492.05   32.00
   4   5   3  557.24   33.60
   4   5   3  481.35   29.60
  -5  -5  -3   64.99   10.70
  -5  -5  -3   53.79   10.70
  -5  -5  -3   51.09   18.00
  -5  -5  -3   32.70   10.50
  -5  -5  -3   69.29   12.70
   5   5   3   53.29   14.40
   5   5   3   93.99   27.20
   5   5   3   87.89   16.90
   5   5   3   56.09   12.90
   5   5   3   55.39   13.80
  -6  -5  -3  249.88   21.20
  -6  -5  -3  275.57   22.00
  -6  -5  -3  296.37   35.80
  -6  -5  -3  283.57   25.40
  -6  -5  -3  292.07   25.90
   6   5   3  281.27   30.30
   6   5   3  305.27   25.50
  -7  -5  -3  169.78   21.40
  -7  -5  -3  166.38   16.20
   7   5   3  227.18   18.30
   7   5   3  190.48   18.70
   3  -6  -3   46.00    8.00
   3  -6  -3   60.69    9.80
  -3   6   3   43.80    7.60
   2  -6  -3    7.50    7.70
   2  -6  -3   21.30   14.80
   2  -6  -3   12.00   10.00
  -2   6   3   14.60    7.10
  -2   6   3   19.30    9.20
  -2   6   3   26.00   13.50
   1  -6  -3  157.88   20.40
   1  -6  -3  157.58   16.90
   1  -6  -3  204.98   20.40
   1  -6  -3  134.99   22.40
  -1   6   3  181.18   17.20
  -1   6   3  154.38   18.80
  -1   6   3  184.08   17.90
   0  -6  -3   22.30   14.90
   0  -6  -3   27.60   10.90
   0  -6  -3    1.60   14.60
   0  -6  -3   22.30    9.30
   0  -6  -3   27.30    9.90
   0   6   3   36.70    9.50
   0   6   3   30.90   18.50
   0   6   3   21.00   14.00
   0   6   3    8.70   13.30
   0   6   3    9.10    7.80
  -1  -6  -3 1635.64   78.49
  -1  -6  -3 1566.84   79.79
  -1  -6  -3 1558.24   81.59
   1   6   3 1685.83   77.59
   1   6   3 1675.83   76.89
   1   6   3 1795.62   82.09
   1   6   3 1713.53   83.29
   1   6   3 1679.33   81.49
   1   6   3 1580.14   79.59
  -2  -6  -3  216.68   36.10
  -2  -6  -3  275.67   24.30
  -2  -6  -3  224.28   28.90
   2   6   3  264.57   19.80
   2   6   3  266.87   24.30
   2   6   3  240.48   23.60
   2   6   3  280.17   25.30
   2   6   3  255.17   25.50
  -3  -6  -3   48.90   14.30
  -3  -6  -3   52.19   18.90
  -3  -6  -3   72.79   14.40
  -3  -6  -3   64.39   12.80
  -3  -6  -3   67.19   13.90
   3   6   3   47.50   10.60
   3   6   3   37.80   11.50
   3   6   3   57.89   23.90
   3   6   3   97.99   15.80
   3   6   3   87.69   16.50
  -4  -6  -3  118.59   17.10
  -4  -6  -3  123.79   15.50
  -4  -6  -3  108.29   16.80
  -4  -6  -3  109.59   16.30
   4   6   3   86.79   12.60
   4   6   3   87.09   15.60
   4   6   3   91.99   15.70
   4   6   3  119.79   19.10
   4   6   3   89.19   16.30
   4   6   3   56.49   17.50
  -5  -6  -3  325.37   26.70
  -5  -6  -3  281.87   24.60
  -5  -6  -3  331.67   26.10
  -5  -6  -3  308.07   28.90
   5   6   3  281.87   30.40
   5   6   3  332.67   30.30
   5   6   3  298.27   24.50
   5   6   3  294.17   30.40
  -6  -6  -3  365.76   29.40
  -6  -6  -3  363.46   32.80
  -6  -6  -3  430.76   30.90
  -6  -6  -3  383.06   25.70
   6   6   3  428.26   30.20
   6   6   3  411.46   27.80
   6   6   3  401.06   36.00
  -7  -6  -3  560.54   34.80
  -7  -6  -3  571.14   37.90
  -7  -6  -3  591.64   30.50
   7   6   3  602.64   33.00
   7   6   3  536.25   32.60
   1  -7  -3   48.00   12.50
   1  -7  -3   39.90    9.90
  -1   7   3   60.19   13.20
  -1   7   3   62.39    9.80
  -1   7   3   65.29   11.00
   0  -7  -3  228.48   18.30
   0  -7  -3  229.68   21.10
   0  -7  -3  254.77   19.40
   0  -7  -3  187.38   24.10
   0   7   3  234.08   18.70
   0   7   3  222.18   29.50
   0   7   3  244.08   20.90
   0   7   3  178.78   23.60
  -1  -7  -3  259.77   21.30
  -1  -7  -3  215.28   20.00
  -1  -7  -3  186.58   27.80
  -1  -7  -3  239.28   23.20
   1   7   3  279.17   20.70
   1   7   3  258.07   28.90
   1   7   3  280.47   21.30
   1   7   3  267.27   25.30
  -2  -7  -3  414.06   36.90
  -2  -7  -3  494.55   30.80
  -2  -7  -3  427.66   34.40
   2   7   3  491.45   32.70
   2   7   3  423.06   37.70
   2   7   3  442.86   29.10
   2   7   3  460.85   28.00
   2   7   3  453.15   34.70
  -3  -7  -3   48.00   12.00
   3   7   3   42.80   11.30
   3   7   3   32.90   13.30
   3   7   3    3.20   16.50
   3   7   3   43.50   11.30
   3   7   3   50.39   10.00
  -4  -7  -3   53.49   14.10
  -4  -7  -3   95.99   14.80
  -4  -7  -3    0.50   26.60
  -4  -7  -3   21.60   17.70
   4   7   3   64.29   18.90
   4   7   3   96.19   16.90
   4   7   3   96.39   18.10
   4   7   3   98.29   14.10
  -5  -7  -3  479.85   34.60
  -5  -7  -3  443.46   34.20
  -5  -7  -3  467.45   32.10
  -5  -7  -3  478.85   29.40
  -5  -7  -3  428.96   28.40
   5   7   3  484.25   35.70
   5   7   3  468.15   36.90
   5   7   3  479.55   29.90
  -6  -7  -3   81.99   13.80
  -6  -7  -3   74.19   15.10
  -6  -7  -3  104.79   17.70
   6   7   3   77.59   11.60
   6   7   3   98.89   14.50
  -7  -7  -3  244.38   15.90
  -7  -7  -3  232.68   20.30
   7   7   3  240.38   18.30
   0  -8  -3   38.20    7.90
   0  -8  -3   32.80    7.80
   0   8   3   48.50   10.30
   0   8   3   41.70    7.90
   0   8   3   32.60   10.10
  -1  -8  -3   22.50    9.60
  -1  -8  -3   36.00    8.40
  -1  -8  -3   13.70    6.70
   1   8   3   19.80    7.40
   1   8   3   29.20    9.80
   1   8   3   17.20    9.70
  -2  -8  -3    1.80    6.60
  -2  -8  -3    5.20    6.40
   2   8   3    2.90   14.00
   2   8   3   18.80    7.20
   2   8   3    8.20    8.80
   2   8   3    3.30   10.00
  -3  -8  -3   33.70    7.80
  -3  -8  -3   27.10    8.20
   3   8   3   45.20    9.90
   3   8   3   44.40   11.00
   3   8   3   31.00   17.10
   3   8   3   46.00   14.00
  -4  -8  -3   65.79    9.10
  -4  -8  -3   99.79   14.70
   4   8   3  114.19   21.60
   4   8   3   77.29   20.00
   4   8   3   83.29   12.20
  -5  -8  -3  363.26   24.40
  -5  -8  -3  346.37   22.50
   5   8   3  374.16   32.40
   5   8   3  328.17   22.80
  -6  -8  -3   66.29   10.30
   6   8   3   90.09   12.00
   6   8   3   60.09   11.60
  -2  -9  -3  135.49   11.00
   2   9   3  121.69   13.50
   2   9   3  128.39   14.10
  -3  -9  -3   83.39   10.10
  -3  -9  -3   87.39   10.50
   3   9   3  111.99   13.80
  -4  -9  -3  268.17   17.20
  -4  -9  -3  257.27   16.40
   4   9   3  278.27   18.30
   5   8  -4   10.30    6.70
   5   8  -4    5.80    9.70
  -5  -8   4   11.80    7.20
  -5  -8   4    8.30    5.80
   4   8  -4   17.70    8.20
   4   8  -4   21.70   10.80
   4   8  -4   21.10    7.40
  -4  -8   4   22.20    9.30
  -4  -8   4   20.20    8.00
  -4  -8   4   19.20    6.90
   3   8  -4  109.29   17.00
   3   8  -4   80.29   12.90
   3   8  -4  133.69   14.10
  -3  -8   4  111.99   13.00
  -3  -8   4  115.29   19.20
   2   8  -4   35.70    9.60
   2   8  -4   35.50   12.90
   2   8  -4   21.70    7.40
  -2  -8   4   -1.20   13.70
  -2  -8   4   19.80    7.00
   1   8  -4   32.00    9.50
   1   8  -4   34.00    8.20
  -1  -8   4   36.30   10.90
  -1  -8   4   28.60   17.50
  -1  -8   4   51.99    8.20
   0   8  -4  168.28   14.60
   0  -8   4  172.58   13.10
   0  -8   4  146.89   22.60
   0  -8   4  141.29   14.50
   6   7  -4  188.28   15.40
   6   7  -4  182.98   26.90
  -6  -7   4  195.78   16.40
  -6  -7   4  213.68   16.50
   5   7  -4  249.18   30.80
   5   7  -4  293.87   22.20
   5   7  -4  266.97   29.80
   5   7  -4  303.87   20.90
  -5  -7   4  255.77   21.60
  -5  -7   4  289.17   21.60
   4   7  -4  114.49   20.70
   4   7  -4  101.59   18.00
   4   7  -4   99.89   13.50
   4   7  -4  129.89   18.30
  -4  -7   4  115.19   16.00
  -4  -7   4   92.49   12.30
  -4  -7   4  125.59   18.90
   3   7  -4  362.46   33.70
   3   7  -4  411.06   26.70
   3   7  -4  396.26   25.30
   3   7  -4  405.36   30.00
  -3  -7   4  367.66   25.80
  -3  -7   4  387.26   29.50
  -3  -7   4  394.66   25.80
   2   7  -4  344.37   30.50
   2   7  -4  334.67   31.90
   2   7  -4  369.66   24.30
   2   7  -4  364.86   24.80
  -2  -7   4  334.87   29.40
  -2  -7   4  377.16   33.70
  -2  -7   4  365.36   23.90
  -2  -7   4  364.36   23.20
   1   7  -4  344.07   23.40
   1   7  -4  342.67   23.30
   1   7  -4  324.87   31.70
  -1  -7   4  360.86   23.90
  -1  -7   4  341.87   32.20
  -1  -7   4  317.37   26.60
   0   7  -4   13.10    8.20
   0   7  -4    6.20    8.20
   0   7  -4    3.70   16.00
   0  -7   4   12.90    8.30
   0  -7   4   20.70    9.40
   0  -7   4   12.40    8.70
  -1   7  -4  191.48   17.80
  -1   7  -4  205.78   17.90
   1  -7   4  191.38   16.30
   1  -7   4  197.68   17.90
   1  -7   4  219.18   18.20
   6   6  -4  324.57   28.90
   6   6  -4  342.77   23.00
  -6  -6   4  338.87   25.10
  -6  -6   4  363.36   27.80
   5   6  -4  307.17   23.30
   5   6  -4  266.77   21.40
   5   6  -4  247.48   28.30
   5   6  -4  269.87   33.30
  -5  -6   4  221.88   23.60
  -5  -6   4  228.48   24.40
  -5  -6   4  247.68   22.80
   4   6  -4  380.26   31.30
   4   6  -4  404.66   28.40
   4   6  -4  362.26   33.80
   4   6  -4  384.86   24.60
   4   6  -4  390.66   26.40
  -4  -6   4  376.06   28.50
  -4  -6   4  357.86   27.90
  -4  -6   4  389.36   29.20
  -4  -6   4  320.17   27.90
  -4  -6   4  374.36   34.10
   3   6  -4  295.37   21.50
   3   6  -4  285.57   25.90
   3   6  -4  281.47   20.80
   3   6  -4  279.97   27.60
  -3  -6   4  289.87   24.10
  -3  -6   4  272.97   22.20
  -3  -6   4  300.57   26.00
  -3  -6   4  312.07   24.60
  -3  -6   4  256.37   28.70
  -3  -6   4  284.17   27.40
   2   6  -4  207.48   21.40
   2   6  -4  184.08   16.30
  -2  -6   4  138.79   24.10
  -2  -6   4  173.68   19.60
  -2  -6   4  130.59   22.80
  -2  -6   4  156.98   17.90
  -2  -6   4  142.99   21.80
   1   6  -4  730.33   43.60
   1   6  -4  717.23   37.80
   1   6  -4  716.73   37.30
  -1  -6   4  667.23   37.20
  -1  -6   4  759.62   39.20
  -1  -6   4  761.42   42.80
  -1  -6   4  748.63   44.50
  -1  -6   4  619.54   41.70
   0   6  -4   15.50   12.10
   0   6  -4   -0.80    9.20
   0   6  -4    7.10    7.00
   0  -6   4    6.30    8.60
   0  -6   4    1.10   10.50
   0  -6   4   14.60   10.40
   0  -6   4    7.60   15.60
   0  -6   4    3.70   15.60
  -1   6  -4  270.47   30.70
  -1   6  -4  279.47   22.90
  -1   6  -4  285.87   20.40
   1  -6   4  286.77   27.00
   1  -6   4  324.07   25.00
   1  -6   4  303.17   24.70
   1  -6   4  275.97   22.00
  -2   6  -4   -4.70   10.50
  -2   6  -4    7.10    9.20
   2  -6   4  -12.70   10.40
   2  -6   4   17.40    8.80
   2  -6   4   17.00    9.70
   2  -6   4    7.90    8.10
   3  -6   4   14.30    6.60
   3  -6   4   11.00    6.60
   3  -6   4    6.60    9.60
   7   5  -4   96.89   13.70
  -7  -5   4   93.29   12.10
  -7  -5   4   91.09   12.60
   6   5  -4  174.68   18.00
   6   5  -4  199.58   24.20
   6   5  -4  201.28   28.00
  -6  -5   4  162.18   17.10
  -6  -5   4  172.48   21.50
  -6  -5   4  176.88   21.50
  -6  -5   4  195.58   22.20
   5   5  -4  599.24   39.50
   5   5  -4  533.25   32.50
   5   5  -4  554.34   41.80
   5   5  -4  520.75   34.10
  -5  -5   4  540.65   34.60
  -5  -5   4  507.75   32.80
  -5  -5   4  522.35   35.40
  -5  -5   4  561.94   36.90
   4   5  -4  911.71   46.00
   4   5  -4  956.30   50.59
   4   5  -4  854.11   53.39
   4   5  -4  849.22   49.70
   4   5  -4  896.51   48.20
   4   5  -4  897.01   45.10
   4   5  -4  721.63   59.39
  -4  -5   4  879.51   48.60
  -4  -5   4  902.21   49.80
  -4  -5   4  920.81   50.99
  -4  -5   4  899.71   47.10
  -4  -5   4  869.41   46.80
   3   5  -4  473.75   33.00
   3   5  -4  447.06   32.40
   3   5  -4  483.05   29.60
   3   5  -4  433.86   26.50
   3   5  -4  447.96   26.50
   3   5  -4  499.75   31.60
  -3  -5   4  455.65   27.90
  -3  -5   4  437.16   30.60
  -3  -5   4  406.56   28.90
  -3  -5   4  458.25   31.40
  -3  -5   4  418.16   29.00
   2   5  -4   77.79   11.10
   2   5  -4   86.99   13.90
   2   5  -4   91.89   15.30
  -2  -5   4   91.59   13.80
  -2  -5   4   75.69   14.40
  -2  -5   4   84.49   13.00
  -2  -5   4   70.09   17.10
  -2  -5   4   93.79   12.90
  -2  -5   4   77.19   14.70
  -2  -5   4   93.19   13.70
   1   5  -4  335.67   23.50
   1   5  -4  318.27   22.60
   1   5  -4  340.97   25.10
  -1  -5   4  340.97   24.60
  -1  -5   4  403.56   29.20
  -1  -5   4  303.37   29.00
  -1  -5   4  404.66   24.30
  -1  -5   4  347.67   28.20
   0   5  -4    6.00   10.10
   0   5  -4    0.00    8.40
   0   5  -4    2.80   10.30
   0   5  -4    4.00    5.90
   0  -5   4   15.30   14.70
   0  -5   4   -1.20   11.10
   0  -5   4  -10.50    9.20
   0  -5   4  -14.10    9.00
   0  -5   4   15.60   11.80
   0  -5   4    6.20   13.40
   0  -5   4    1.20   10.20
  -1   5  -4  166.98   26.50
  -1   5  -4  171.78   15.20
   1  -5   4  192.78   22.10
   1  -5   4  209.28   26.10
   1  -5   4  188.28   23.90
   1  -5   4  207.58   22.20
   1  -5   4  166.48   22.50
   1  -5   4  199.88   20.50
   1  -5   4  181.58   28.50
  -2   5  -4    3.60   25.00
  -2   5  -4   10.40    8.30
   2  -5   4   15.30   12.00
   2  -5   4   14.10    9.00
   2  -5   4   -1.30   10.70
   2  -5   4    3.30   16.30
   2  -5   4   14.60    9.20
   2  -5   4   -3.90   16.80
   2  -5   4   19.00   12.20
  -3   5  -4  195.28   22.50
  -3   5  -4  240.98   20.00
   3  -5   4  247.08   21.20
   3  -5   4  251.07   20.90
   3  -5   4  248.38   22.10
   3  -5   4  257.47   21.10
   4  -5   4  129.39   13.80
   4  -5   4  164.98   13.70
   4  -5   4  123.59   13.30
   7   4  -4   99.59   13.60
  -7  -4   4   87.79   11.80
  -7  -4   4   81.49   15.60
   6   4  -4   51.89   13.00
   6   4  -4   49.40   11.70
   6   4  -4   25.20   13.30
  -6  -4   4   47.70   13.70
  -6  -4   4   39.10   12.50
  -6  -4   4   29.70   14.30
  -6  -4   4   60.69   10.30
   5   4  -4    9.50   11.00
   5   4  -4    1.90   13.90
   5   4  -4   28.70   11.30
  -5  -4   4    3.80    9.20
  -5  -4   4    4.10    9.10
  -5  -4   4   12.00   13.00
  -5  -4   4   13.40    9.70
   4   4  -4 2599.74  113.19
   4   4  -4 2385.56  109.89
   4   4  -4 2379.56  115.29
   4   4  -4 2320.07  110.39
   4   4  -4 2410.76  110.19
   4   4  -4 2425.56  107.29
   4   4  -4 2340.47  107.69
  -4  -4   4 2449.95  111.09
  -4  -4   4 2278.97  108.09
  -4  -4   4 2538.15  112.69
  -4  -4   4 2421.56  109.39
  -4  -4   4 2349.86  111.79
   3   4  -4  181.98   15.50
   3   4  -4  173.38   14.50
   3   4  -4  167.28   15.60
   3   4  -4  181.88   17.60
   3   4  -4  180.08   15.20
   3   4  -4  179.28   17.00
  -3  -4   4  152.08   15.70
  -3  -4   4  147.69   14.00
  -3  -4   4  145.69   16.60
   2   4  -4 1241.98   60.29
   2   4  -4 1296.27   57.59
   2   4  -4 1226.88   57.09
  -2  -4   4 1226.28   59.49
  -2  -4   4 1250.67   60.19
  -2  -4   4 1275.57   58.39
   1   4  -4  258.67   18.20
   1   4  -4  241.88   15.20
  -1  -4   4  203.28   18.40
  -1  -4   4  232.38   16.90
   0   4  -4   23.90    5.70
   0   4  -4   10.90    6.00
   0  -4   4   25.60    7.20
   0  -4   4   33.90    8.40
  -1   4  -4  212.38   17.80
  -1   4  -4  192.88   13.90
  -1   4  -4  164.28   17.70
   1  -4   4  203.38   18.30
   1  -4   4  195.18   21.00
   1  -4   4  209.18   23.70
   1  -4   4  180.88   18.20
   1  -4   4  186.18   20.30
   1  -4   4  188.98   22.50
  -2   4  -4  201.78   23.40
  -2   4  -4  184.08   27.10
  -2   4  -4  198.18   15.60
   2  -4   4  172.98   23.10
   2  -4   4  194.88   25.60
   2  -4   4  219.68   23.30
   2  -4   4  158.18   26.90
   2  -4   4  202.78   21.70
   2  -4   4  210.88   23.60
   2  -4   4  197.38   22.40
  -3   4  -4  758.72   52.59
  -3   4  -4  892.51   41.20
   3  -4   4  808.72   45.90
   3  -4   4  718.73   50.29
   3  -4   4  766.02   46.50
   3  -4   4  797.62   46.10
   3  -4   4  863.51   47.60
   3  -4   4  822.42   45.80
  -4   4  -4   10.90    9.50
  -4   4  -4   13.80   10.70
   4  -4   4    4.10    8.90
   4  -4   4    7.50    8.80
   4  -4   4   16.80    8.90
   4  -4   4    8.70    7.80
   7   3  -4  110.49   14.00
  -7  -3   4  115.69   12.60
   6   3  -4    8.20   10.10
   6   3  -4   10.30   13.20
  -6  -3   4    0.40    7.70
  -6  -3   4   -4.50   12.70
  -6  -3   4   13.10   12.50
  -6  -3   4    7.10    9.70
  -6  -3   4   -4.00   17.20
  -6  -3   4   13.50   17.30
   5   3  -4  290.07   25.60
   5   3  -4  334.57   28.10
   5   3  -4  358.06   30.50
  -5  -3   4  326.07   25.70
  -5  -3   4  329.57   24.60
  -5  -3   4  275.67   21.80
  -5  -3   4  321.17   24.50
  -5  -3   4  279.77   33.60
   4   3  -4 1097.89   60.69
   4   3  -4 1051.09   54.49
   4   3  -4 1112.99   53.59
   4   3  -4 1186.28   57.59
   4   3  -4 1072.29   55.79
   4   3  -4 1105.59   54.29
   4   3  -4 1076.49   52.59
  -4  -3   4 1081.79   54.49
  -4  -3   4 1107.09   54.39
  -4  -3   4 1108.39   56.89
  -4  -3   4 1065.99   59.79
  -4  -3   4 1069.19   53.09
  -4  -3   4 1082.59   51.79
  -4  -3   4 1142.89   55.89
   3   3  -4  375.96   23.20
   3   3  -4  370.56   22.20
   3   3  -4  359.86   21.80
   3   3  -4  366.16   21.40
   3   3  -4  379.56   21.10
  -3  -3   4  350.96   22.90
  -3  -3   4  342.97   21.30
  -3  -3   4  329.67   22.40
  -3  -3   4  314.57   18.50
   2   3  -4  224.58   16.20
   2   3  -4  222.58   15.00
   2   3  -4  232.78   16.50
   2   3  -4  203.48   13.70
  -2  -3   4  279.77   15.80
  -2  -3   4  272.37   17.50
  -2  -3   4  285.77   16.70
   1   3  -4  772.12   32.60
   1   3  -4  680.23   32.00
   1   3  -4  732.73   34.80
  -1  -3   4  671.23   34.70
  -1  -3   4  706.83   33.60
  -1  -3   4  640.04   35.00
  -1  -3   4  697.73   34.80
   0   3  -4   86.89    6.30
   0   3  -4   97.99    8.10
   0  -3   4   88.19    9.20
   0  -3   4   91.29    9.40
   0  -3   4   92.39    6.80
  -1   3  -4  899.71   40.90
  -1   3  -4  796.82   39.60
  -1   3  -4  841.62   38.60
   1  -3   4  829.32   41.30
   1  -3   4  852.31   42.10
  -2   3  -4   18.90    7.90
  -2   3  -4   18.70    8.50
   2  -3   4   18.50   13.60
   2  -3   4    9.80   11.70
   2  -3   4   12.50    7.10
   2  -3   4   23.10    8.50
   2  -3   4    9.70   11.00
  -3   3  -4 2316.77  108.39
  -3   3  -4 2265.87  108.59
  -3   3  -4 2310.37  101.79
   3  -3   4 2385.76  110.29
   3  -3   4 2356.76  108.59
   3  -3   4 2365.56  108.99
   3  -3   4 2219.08  107.39
   3  -3   4 2376.76  108.69
   3  -3   4 2398.16  108.39
  -4   3  -4   96.59   14.30
  -4   3  -4   83.29   14.80
   4  -3   4  123.99   19.70
   4  -3   4  113.99   20.10
   4  -3   4  121.29   18.10
   4  -3   4  113.59   17.50
   4  -3   4  112.49   15.20
  -5   3  -4  244.58   19.10
  -5   3  -4  212.98   28.90
  -5   3  -4  214.18   18.70
   5  -3   4  197.58   17.80
   5  -3   4  190.68   18.50
   5  -3   4  204.38   18.60
   7   2  -4  236.38   17.60
   7   2  -4  220.28   16.10
  -7  -2   4  253.57   17.00
   6   2  -4  134.79   19.00
  -6  -2   4  119.69   20.80
  -6  -2   4  102.39   26.70
  -6  -2   4  145.59   22.10
  -6  -2   4  100.99   21.60
  -6  -2   4  141.19   17.40
  -6  -2   4  154.38   20.70
  -6  -2   4  136.39   15.40
   5   2  -4  579.14   36.80
   5   2  -4  553.44   35.00
  -5  -2   4  502.55   29.60
  -5  -2   4  527.55   33.10
  -5  -2   4  490.45   47.90
  -5  -2   4  527.35   31.90
  -5  -2   4  544.05   34.80
  -5  -2   4  475.65   34.70
  -5  -2   4  524.95   32.80
   4   2  -4  452.15   29.60
   4   2  -4  468.35   36.20
   4   2  -4  471.75   32.50
   4   2  -4  469.25   31.90
  -4  -2   4  567.64   32.30
  -4  -2   4  567.94   29.60
  -4  -2   4  525.95   32.60
  -4  -2   4  539.05   30.30
  -4  -2   4  568.94   28.80
  -4  -2   4  572.14   29.90
  -4  -2   4  537.25   31.90
   3   2  -4  216.58   16.00
   3   2  -4  179.58   13.80
   3   2  -4  188.08   14.30
   3   2  -4  193.48   15.80
   3   2  -4  194.88   14.90
  -3  -2   4  148.99   15.20
  -3  -2   4  184.58   14.90
  -3  -2   4  181.78   14.30
  -3  -2   4  175.88   12.40
  -3  -2   4  185.78   14.00
   2   2  -4 2567.84  117.99
   2   2  -4 2670.33  118.59
   2   2  -4 2612.74  117.99
   2   2  -4 2595.04  116.89
  -2  -2   4 2817.82  118.89
  -2  -2   4 2938.31  118.89
  -2  -2   4 2865.61  117.99
  -2  -2   4 2727.73  115.29
   1   2  -4 2847.42  121.39
   1   2  -4 2802.02  119.09
  -1  -2   4 2767.42  122.29
  -1  -2   4 2918.71  121.89
  -1  -2   4 2788.02  120.89
   0   2  -4  522.45   24.40
   0   2  -4  548.35   25.40
   0  -2   4  601.04   28.10
   0  -2   4  584.04   27.70
   0  -2   4  589.14   25.70
   1  -2   4  762.32   36.10
   1  -2   4  741.73   36.20
  -2   2  -4   61.29    9.10
  -2   2  -4   67.79    8.80
  -2   2  -4   70.59   11.40
   2  -2   4   49.50    9.00
   2  -2   4   69.89    9.50
  -3   2  -4 1228.68   57.79
  -3   2  -4 1124.79   51.99
   3  -2   4 1174.88   59.79
   3  -2   4 1158.88   59.79
   3  -2   4 1158.18   57.39
   3  -2   4 1139.49   58.99
   3  -2   4 1180.38   60.29
   3  -2   4 1059.69   59.69
   3  -2   4 1169.58   60.29
  -4   2  -4   33.20   13.80
  -4   2  -4   49.99   12.00
  -4   2  -4   48.30    9.20
   4  -2   4   38.10   13.10
   4  -2   4   66.09   15.20
   4  -2   4   60.19   11.80
   4  -2   4   49.20   11.90
   4  -2   4   68.29   15.60
   4  -2   4   44.90   14.90
  -5   2  -4   20.70    9.60
  -5   2  -4   28.10    9.10
   5  -2   4    5.00    7.80
   5  -2   4   20.60    9.90
   5  -2   4   23.70    9.50
   5  -2   4   23.80    9.90
  -6   2  -4  100.49   13.00
   6  -2   4   80.99   13.10
   6  -2   4   74.19   11.60
   6  -2   4   76.09   11.30
   6   1  -4   17.40    8.90
  -6  -1   4   18.00   10.90
  -6  -1   4   19.10    7.30
  -6  -1   4   17.20   11.80
  -6  -1   4   10.00    8.50
   5   1  -4  114.49   20.40
   5   1  -4   74.79   15.10
  -5  -1   4   97.89   16.90
  -5  -1   4  109.79   17.90
  -5  -1   4  117.79   17.80
  -5  -1   4   86.69   15.20
  -5  -1   4  109.29   13.70
  -5  -1   4  107.09   16.90
   4   1  -4  678.03   43.70
   4   1  -4  726.73   42.60
   4   1  -4  682.73   44.40
  -4  -1   4  773.22   42.00
  -4  -1   4  764.52   42.40
  -4  -1   4  818.22   42.50
  -4  -1   4  824.22   40.60
  -4  -1   4  821.62   39.70
  -4  -1   4  836.12   39.30
  -4  -1   4  825.72   41.30
   3   1  -4 1410.66   61.59
   3   1  -4 1289.47   58.69
   3   1  -4 1351.36   58.59
   3   1  -4 1157.18   58.09
  -3  -1   4 1266.47   59.39
  -3  -1   4 1295.87   57.99
  -3  -1   4 1250.27   59.69
  -3  -1   4 1262.17   58.49
  -3  -1   4 1260.67   58.29
  -3  -1   4 1207.58   57.69
   2   1  -4  958.60   44.40
   2   1  -4  915.81   43.30
   2   1  -4  846.62   42.90
   2   1  -4  872.21   42.70
  -2  -1   4  942.21   42.10
  -2  -1   4  970.20   43.60
  -2  -1   4 1021.10   43.30
  -2  -1   4  965.00   44.20
   1   1  -4 1162.98   51.89
   1   1  -4 1175.88   52.19
   1   1  -4 1208.98   52.39
  -1  -1   4 1155.78   50.19
  -1  -1   4 1166.18   51.89
   0   1  -4  465.95   22.20
   0  -1   4  459.75   21.50
   0  -1   4  476.75   22.00
   0  -1   4  438.66   22.20
  -1   1  -4 3381.26  135.59
   1  -1   4 3104.29  136.49
   1  -1   4 3087.89  135.79
  -2   1  -4  551.14   27.10
  -2   1  -4  532.35   25.00
   2  -1   4  564.34   27.50
   2  -1   4  538.65   28.00
  -3   1  -4 1007.40   50.59
  -3   1  -4 1150.38   51.89
  -3   1  -4 1025.30   48.80
  -3   1  -4 1055.99   52.69
   3  -1   4 1232.28   53.29
  -4   1  -4  141.49   18.10
  -4   1  -4  107.59   12.90
   4  -1   4  147.59   18.70
   4  -1   4  161.68   22.60
   4  -1   4  129.79   20.80
   4  -1   4  158.58   19.70
   4  -1   4  164.78   20.90
  -5   1  -4  213.48   31.60
  -5   1  -4  264.27   19.30
  -5   1  -4  217.78   19.70
   5  -1   4  232.78   21.90
   5  -1   4  232.68   24.10
   5  -1   4  218.48   24.30
   5  -1   4  221.88   23.50
   5  -1   4  198.58   30.30
  -6   1  -4   20.10    8.00
  -6   1  -4   35.80    9.50
   6  -1   4   23.20    9.50
   6  -1   4   26.60    8.60
   6  -1   4   38.20   10.30
   6   0  -4  117.99   15.50
   6   0  -4  104.59   13.60
  -6   0   4   64.79   11.40
  -6   0   4   87.69   14.60
  -6   0   4   95.39   13.20
  -6   0   4   98.39   17.10
   5   0  -4  359.36   33.50
   5   0  -4  426.66   30.10
  -5   0   4  417.26   25.20
  -5   0   4  421.96   29.50
  -5   0   4  396.46   33.90
  -5   0   4  426.46   28.50
  -5   0   4  386.96   26.00
   4   0  -4  836.72   44.10
   4   0  -4  793.72   45.20
  -4   0   4  760.72   39.30
  -4   0   4  769.82   42.90
  -4   0   4  728.73   40.40
  -4   0   4  785.62   39.90
  -4   0   4  734.33   42.90
  -4   0   4  801.82   42.70
   3   0  -4  214.88   15.40
   3   0  -4  223.28   15.80
  -3   0   4  217.28   15.50
  -3   0   4  199.28   17.30
  -3   0   4  219.88   15.70
  -3   0   4  206.58   14.90
  -3   0   4  221.78   15.00
   2   0  -4  175.28   13.30
   2   0  -4  185.58   12.40
   2   0  -4  181.28   12.00
  -2   0   4  176.38   11.80
  -2   0   4  179.78   14.90
  -2   0   4  176.48   11.60
  -2   0   4  191.98   12.30
   1   0  -4 1909.81   81.39
   1   0  -4 1865.61   81.39
   1   0  -4 1910.51   81.39
  -1   0   4 1864.31   80.79
  -1   0   4 1831.72   80.49
   0   0  -4  434.56   20.90
   0   0  -4  440.86   21.00
   0   0   4  424.86   20.10
   0   0   4  443.26   19.10
   0   0   4  455.75   20.80
  -1   0  -4 2222.58   92.99
  -1   0  -4 2118.09   92.69
   1   0   4 2162.88   92.49
   1   0   4 2151.68   92.69
   1   0   4 2214.38   92.69
   1   0   4 2241.68   94.19
  -2   0  -4    8.00    3.40
   2   0   4    1.20    2.10
   2   0   4    0.30    2.70
   2   0   4    2.90    3.20
  -3   0  -4 1224.48   58.29
  -3   0  -4 1171.18   56.39
  -3   0  -4 1334.97   59.59
   3   0   4 1400.66   58.99
  -4   0  -4  145.09   17.50
  -4   0  -4  131.09   15.10
  -4   0  -4  121.79   17.70
  -4   0  -4  137.59   12.50
  -4   0  -4  116.39   16.10
   4   0   4  136.69   14.90
   4   0   4  170.38   23.90
   4   0   4  138.39   17.80
   4   0   4  153.18   20.90
  -5   0  -4   30.50    9.00
  -5   0  -4   29.80    8.10
   5   0   4   13.50   11.10
   5   0   4   20.70    9.50
   5   0   4   37.20   12.50
   5   0   4   32.20   14.10
   5   0   4   28.40   13.40
   5   0   4   44.70   13.70
  -6   0  -4  143.09   16.30
  -6   0  -4  124.09   18.60
  -6   0  -4  144.99   15.60
   6   0   4  132.79   18.70
   6   0   4  157.78   19.10
   6   0   4  154.78   19.80
  -7   0  -4  335.97   18.90
   7   0   4  326.87   21.50
   7   0   4  286.57   20.00
   7   0   4  309.77   20.20
   6  -1  -4  257.17   18.70
  -6   1   4  224.58   22.30
  -6   1   4  246.58   17.30
  -6   1   4  239.28   18.50
  -6   1   4  221.08   20.40
   5  -1  -4  232.18   24.70
   5  -1  -4  243.38   20.70
  -5   1   4  169.68   18.30
  -5   1   4  205.68   21.10
  -5   1   4  194.78   17.50
  -5   1   4  193.08   21.70
   4  -1  -4  511.55   34.70
   4  -1  -4  517.15   34.60
   4  -1  -4  434.46   42.20
   4  -1  -4  481.05   36.60
  -4   1   4  592.44   35.50
  -4   1   4  542.15   30.10
  -4   1   4  547.35   29.40
  -4   1   4  532.75   34.40
   3  -1  -4  184.88   16.90
   3  -1  -4  172.68   16.50
   3  -1  -4  173.58   16.40
  -3   1   4  203.18   15.40
  -3   1   4  221.48   15.00
  -3   1   4  241.88   17.40
   2  -1  -4  100.69   10.20
   2  -1  -4  118.29   10.30
   2  -1  -4  118.79   10.70
  -2   1   4  126.49   10.00
  -2   1   4  114.19   10.40
   1  -1  -4  783.82   34.80
   1  -1  -4  746.83   35.30
   1  -1  -4  741.73   35.30
  -1   1   4  754.82   34.40
  -1   1   4  740.23   35.20
  -1   1   4  731.83   32.90
  -1   1   4  761.52   35.00
   0  -1  -4 2705.73  116.09
   0  -1  -4 2797.72  116.29
   0  -1  -4 2637.94  114.49
   0   1   4 2626.24  115.09
   0   1   4 2804.22  114.69
   0   1   4 2748.02  117.19
   0   1   4 2719.03  115.89
  -1  -1  -4  880.91   41.70
  -1  -1  -4  845.72   40.90
  -1  -1  -4  887.51   41.30
   1   1   4  960.10   41.20
   1   1   4 1025.90   42.50
   1   1   4 1010.20   42.00
  -2  -1  -4  693.33   32.70
  -2  -1  -4  708.43   35.20
   2   1   4  734.83   32.90
   2   1   4  790.82   34.80
   2   1   4  758.52   33.30
   2   1   4  739.23   34.40
   2   1   4  820.32   35.40
  -3  -1  -4  396.16   21.30
  -3  -1  -4  388.76   19.80
  -3  -1  -4  420.36   22.40
   3   1   4  336.57   21.00
   3   1   4  337.87   19.70
   3   1   4  384.06   21.10
  -4  -1  -4  159.48   17.10
  -4  -1  -4  153.38   16.90
  -4  -1  -4  157.98   15.50
  -4  -1  -4  178.68   13.50
  -4  -1  -4  170.58   15.30
   4   1   4  188.98   15.50
  -5  -1  -4  553.14   34.80
  -5  -1  -4  573.94   40.10
  -5  -1  -4  503.55   32.60
  -5  -1  -4  507.55   30.00
  -5  -1  -4  580.24   30.70
  -5  -1  -4  476.75   37.50
   5   1   4  507.05   34.10
   5   1   4  536.85   37.10
   5   1   4  547.25   34.80
   5   1   4  533.95   36.20
   5   1   4  514.15   32.60
   5   1   4  564.04   36.80
  -6  -1  -4   42.40    9.20
  -6  -1  -4   26.90    8.10
  -6  -1  -4   12.50   12.90
  -6  -1  -4   46.60   20.70
   6   1   4   21.30   13.00
   6   1   4   44.70   12.40
   6   1   4   49.40   10.00
   6   1   4   36.70   12.40
  -7  -1  -4   53.99   10.50
  -7  -1  -4   76.29   11.70
   7   1   4   43.70    9.60
   7   1   4   50.19   12.20
   7   1   4   40.80   11.50
   5  -2  -4  360.86   26.80
   5  -2  -4  370.66   22.80
  -5   2   4  381.86   28.60
  -5   2   4  398.06   26.80
  -5   2   4  368.36   23.40
  -5   2   4  385.76   25.30
   4  -2  -4  193.88   26.30
   4  -2  -4  172.58   26.60
   4  -2  -4  177.98   22.40
   4  -2  -4  167.88   28.20
   4  -2  -4  171.48   21.20
   4  -2  -4  182.58   23.20
  -4   2   4  175.38   24.70
  -4   2   4  227.78   21.20
  -4   2   4  236.38   18.00
  -4   2   4  235.28   18.30
  -4   2   4  242.48   25.50
  -4   2   4  206.08   23.50
   3  -2  -4   51.29   18.60
   3  -2  -4  113.49   16.90
   3  -2  -4   88.29   14.50
   3  -2  -4   97.19   15.80
   3  -2  -4   68.09   12.40
   3  -2  -4   86.09   15.80
   3  -2  -4   61.19   13.60
  -3   2   4   90.29   13.40
  -3   2   4   73.89   11.20
  -3   2   4   86.39   15.80
  -3   2   4   80.09   11.70
  -3   2   4   93.79   14.20
   2  -2  -4  217.18   16.30
   2  -2  -4  235.08   16.90
   2  -2  -4  231.38   16.90
  -2   2   4  210.28   15.90
  -2   2   4  215.88   16.00
  -2   2   4  210.78   15.30
  -2   2   4  231.38   15.00
   1  -2  -4 3869.71  167.18
   1  -2  -4 3978.60  171.18
   1  -2  -4 4020.00  171.28
   1  -2  -4 4031.30  170.38
  -1   2   4 3912.01  174.08
  -1   2   4 4081.09  171.08
  -1   2   4 3944.11  170.58
  -1   2   4 4011.60  170.78
  -1   2   4 4034.90  169.48
   0  -2  -4 2807.12  114.39
   0  -2  -4 2681.33  112.39
   0  -2  -4 2662.93  113.99
   0  -2  -4 2627.24  111.79
   0   2   4 2614.84  112.79
   0   2   4 2616.74  114.19
   0   2   4 2563.14  113.09
   0   2   4 2613.04  113.69
   0   2   4 2545.15  115.39
  -1  -2  -4 3663.83  153.18
  -1  -2  -4 3781.72  152.98
  -1  -2  -4 3723.03  152.68
   1   2   4 3494.25  152.58
   1   2   4 3426.96  152.88
   1   2   4 3461.05  154.18
  -2  -2  -4  659.43   32.30
  -2  -2  -4  649.24   31.80
  -2  -2  -4  590.84   31.00
   2   2   4  659.73   32.10
   2   2   4  703.33   31.90
   2   2   4  727.03   33.40
  -3  -2  -4   21.90    5.80
  -3  -2  -4    9.00    4.80
  -3  -2  -4   25.80    6.40
   3   2   4   23.20    5.90
   3   2   4   21.30    6.10
   3   2   4   20.80    6.00
   3   2   4   20.80    4.60
  -4  -2  -4  386.66   23.50
  -4  -2  -4  378.46   24.10
  -4  -2  -4  405.76   26.10
  -4  -2  -4  400.86   22.70
  -4  -2  -4  410.66   26.40
   4   2   4  419.76   25.90
   4   2   4  384.16   23.30
   4   2   4  425.96   25.50
  -5  -2  -4  499.35   34.10
  -5  -2  -4  423.26   33.70
  -5  -2  -4  476.95   29.90
  -5  -2  -4  526.45   28.30
  -5  -2  -4  501.55   32.00
  -5  -2  -4  490.65   28.00
   5   2   4  505.45   32.40
   5   2   4  412.46   33.80
   5   2   4  533.65   35.00
   5   2   4  457.15   32.70
   5   2   4  440.86   31.20
  -6  -2  -4   35.80   13.70
  -6  -2  -4   32.10    8.50
  -6  -2  -4   39.80   13.90
  -6  -2  -4   52.09    9.70
  -6  -2  -4   44.30   12.70
   6   2   4   61.99   11.80
   6   2   4   45.20   14.00
   6   2   4   60.99   13.30
   6   2   4   69.99   15.50
  -7  -2  -4   67.69   11.80
  -7  -2  -4   56.49   10.70
  -7  -2  -4   46.70   10.30
   7   2   4   64.69   11.60
   5  -3  -4  215.58   18.00
  -5   3   4  229.28   19.90
  -5   3   4  245.08   19.80
  -5   3   4  238.98   16.70
  -5   3   4  210.08   22.40
   4  -3  -4   14.90   11.80
   4  -3  -4   34.90   11.10
   4  -3  -4    9.60   12.50
   4  -3  -4   17.90    8.90
  -4   3   4   38.60   11.80
  -4   3   4   24.10    7.60
  -4   3   4   25.00   12.60
  -4   3   4   23.40    9.00
   3  -3  -4   26.10   13.00
   3  -3  -4   26.70   13.90
   3  -3  -4    8.20   10.30
   3  -3  -4   23.40   11.80
   3  -3  -4   32.70   10.90
   3  -3  -4    8.30   13.40
  -3   3   4   23.10    7.60
  -3   3   4   35.20    9.90
  -3   3   4   -4.00   12.80
  -3   3   4   25.10    8.60
  -3   3   4   12.30   10.50
  -3   3   4   31.80   12.30
   2  -3  -4  383.86   31.90
   2  -3  -4  375.06   29.50
   2  -3  -4  405.16   29.90
   2  -3  -4  411.86   27.40
   2  -3  -4  389.66   30.20
   2  -3  -4  386.76   27.10
   2  -3  -4  432.86   40.00
  -2   3   4  457.35   24.40
  -2   3   4  421.66   26.50
  -2   3   4  467.35   27.90
  -2   3   4  445.06   24.70
  -2   3   4  436.66   27.50
   1  -3  -4 1574.04   71.49
   1  -3  -4 1497.05   71.99
   1  -3  -4 1528.95   72.29
  -1   3   4 1526.65   69.79
  -1   3   4 1627.74   72.19
  -1   3   4 1554.94   71.39
  -1   3   4 1560.34   71.89
  -1   3   4 1572.84   69.69
   0  -3  -4  674.33   31.70
   0  -3  -4  617.34   28.20
   0  -3  -4  641.14   32.90
   0  -3  -4  674.63   33.30
   0   3   4  668.93   32.30
   0   3   4  625.04   32.30
   0   3   4  631.14   32.50
   0   3   4  639.04   31.30
   0   3   4  631.04   37.40
  -1  -3  -4 9964.50  388.86
  -1  -3  -4 9144.58  385.76
  -1  -3  -4 9485.05  386.36
  -1  -3  -4 9650.73  388.16
  -1  -3  -4 8752.22  385.56
   1   3   4 8909.01  387.56
   1   3   4 8874.31  386.36
   1   3   4 8937.11  390.06
   1   3   4 9192.88  387.56
   1   3   4 9145.08  387.26
  -2  -3  -4  282.67   16.70
  -2  -3  -4  322.07   17.40
  -2  -3  -4  289.57   16.60
   2   3   4  299.07   17.30
   2   3   4  261.47   17.10
   2   3   4  265.57   17.00
   2   3   4  267.57   19.10
   2   3   4  283.87   17.00
   2   3   4  281.17   17.30
  -3  -3  -4 2358.66  101.99
  -3  -3  -4 2322.27  100.79
  -3  -3  -4 2224.08  100.49
  -3  -3  -4 2260.17  102.89
  -3  -3  -4 2312.17  103.09
   3   3   4 2296.77  102.39
   3   3   4 2403.76  104.79
   3   3   4 2262.57  102.39
  -4  -3  -4  378.06   24.10
  -4  -3  -4  418.56   27.20
  -4  -3  -4  404.86   24.10
  -4  -3  -4  423.16   27.60
  -4  -3  -4  405.16   25.30
   4   3   4  475.65   29.40
   4   3   4  445.06   27.30
   4   3   4  473.95   27.00
  -5  -3  -4  191.98   22.10
  -5  -3  -4  138.89   18.00
  -5  -3  -4  165.28   22.30
  -5  -3  -4  146.19   15.10
  -5  -3  -4  156.78   15.00
  -5  -3  -4  175.68   17.00
   5   3   4  133.69   20.70
   5   3   4  142.79   21.10
   5   3   4  171.08   21.00
   5   3   4  163.08   24.10
   5   3   4  178.98   20.70
  -6  -3  -4  696.83   41.70
  -6  -3  -4  732.73   40.10
  -6  -3  -4  686.33   36.40
  -6  -3  -4  691.53   37.20
  -6  -3  -4  692.53   40.90
   6   3   4  582.74   42.10
   6   3   4  621.04   41.40
   6   3   4  671.03   39.50
  -7  -3  -4  171.28   18.40
  -7  -3  -4  154.88   14.60
  -7  -3  -4  178.78   17.60
  -7  -3  -4  112.49   18.30
   7   3   4  153.58   18.90
   7   3   4  174.08   15.80
   4  -4  -4  207.38   19.00
   4  -4  -4  193.78   19.70
   4  -4  -4  187.28   20.10
  -4   4   4  207.18   22.90
  -4   4   4  216.58   16.70
  -4   4   4  220.28   21.40
  -4   4   4  226.88   19.50
   3  -4  -4  108.79   16.10
   3  -4  -4   82.89   14.30
   3  -4  -4  100.99   18.10
   3  -4  -4  125.09   20.20
  -3   4   4  112.59   16.90
  -3   4   4  102.59   14.80
  -3   4   4  118.19   14.30
  -3   4   4  112.49   16.20
   2  -4  -4 1091.29   59.79
   2  -4  -4 1097.99   57.29
   2  -4  -4 1028.80   60.69
   2  -4  -4 1091.09   61.29
   2  -4  -4 1147.89   59.99
   2  -4  -4 1130.79   59.69
  -2   4   4 1225.88   55.79
  -2   4   4 1204.38   61.79
  -2   4   4 1195.58   61.49
  -2   4   4 1219.08   58.89
  -2   4   4 1188.58   60.59
  -2   4   4 1177.18   56.09
   1  -4  -4  829.72   43.40
   1  -4  -4  883.51   46.30
   1  -4  -4  839.02   45.70
   1  -4  -4  822.82   44.40
   1  -4  -4  840.12   44.00
  -1   4   4  771.42   43.10
  -1   4   4  780.62   42.20
  -1   4   4  735.43   42.60
  -1   4   4  749.13   39.70
  -1   4   4  772.22   40.10
   0  -4  -4 1151.08   54.59
   0  -4  -4 1090.79   55.59
   0   4   4 1136.49   53.19
   0   4   4 1180.38   55.59
   0   4   4 1101.29   54.59
   0   4   4 1123.09   53.29
   0   4   4 1218.28   55.69
  -1  -4  -4  693.73   33.50
  -1  -4  -4  678.53   32.20
  -1  -4  -4  700.03   32.00
   1   4   4  648.64   34.50
   1   4   4  686.43   33.60
   1   4   4  673.13   34.70
   1   4   4  678.93   34.80
   1   4   4  645.94   33.50
  -2  -4  -4  345.27   19.60
  -2  -4  -4  288.67   21.20
  -2  -4  -4  325.17   21.00
  -2  -4  -4  335.97   19.00
   2   4   4  291.77   26.30
   2   4   4  327.77   19.90
   2   4   4  326.37   20.90
   2   4   4  339.97   20.40
   2   4   4  308.67   19.80
   2   4   4  284.67   20.10
  -3  -4  -4 1051.69   51.19
  -3  -4  -4 1089.99   51.49
  -3  -4  -4 1079.49   49.80
  -3  -4  -4  993.50   48.40
  -3  -4  -4 1043.70   49.10
   3   4   4 1000.50   49.40
   3   4   4 1114.09   51.29
   3   4   4  961.10   48.70
   3   4   4 1045.60   51.49
   3   4   4  967.00   53.79
  -4  -4  -4  706.03   38.10
  -4  -4  -4  712.33   39.60
  -4  -4  -4  715.33   38.50
  -4  -4  -4  721.73   42.10
  -4  -4  -4  697.73   42.00
  -4  -4  -4  745.73   41.50
   4   4   4  799.42   45.30
   4   4   4  854.51   42.70
   4   4   4  859.81   42.40
   4   4   4  838.22   45.80
  -5  -4  -4  266.77   19.40
  -5  -4  -4  273.57   20.70
  -5  -4  -4  259.67   24.20
  -5  -4  -4  239.48   28.70
  -5  -4  -4  281.17   21.80
  -5  -4  -4  283.37   23.70
   5   4   4  266.47   27.50
   5   4   4  310.07   25.70
   5   4   4  221.38   29.50
   5   4   4  286.27   26.30
  -6  -4  -4  653.33   34.90
  -6  -4  -4  686.63   39.90
  -6  -4  -4  695.23   38.80
  -6  -4  -4  661.93   36.60
  -6  -4  -4  704.53   40.90
   6   4   4  628.94   39.50
   6   4   4  547.45   41.10
   6   4   4  599.74   39.40
  -7  -4  -4   84.59   13.90
  -7  -4  -4   83.69   12.60
  -7  -4  -4   57.99   14.00
  -7  -4  -4   76.69   13.60
   7   4   4  102.19   14.60
   7   4   4  120.99   17.20
   3  -5  -4  409.96   27.40
   3  -5  -4  373.06   28.10
   3  -5  -4  372.46   28.90
  -3   5   4  438.16   26.80
  -3   5   4  471.45   25.90
  -3   5   4  378.36   32.00
  -3   5   4  443.46   29.50
   2  -5  -4  189.98   23.10
   2  -5  -4  188.88   18.80
   2  -5  -4  197.48   21.00
   2  -5  -4  171.78   23.00
  -2   5   4  199.98   24.40
  -2   5   4  190.58   18.20
  -2   5   4  207.58   24.30
  -2   5   4  198.88   17.90
   1  -5  -4  288.17   29.10
   1  -5  -4  290.07   23.30
   1  -5  -4  304.77   29.20
   1  -5  -4  359.26   27.10
  -1   5   4  281.57   21.20
  -1   5   4  251.67   26.30
  -1   5   4  281.57   25.20
  -1   5   4  302.97   21.50
  -1   5   4  302.87   28.50
  -1   5   4  230.88   27.50
   0  -5  -4  784.72   51.49
   0  -5  -4  934.71   50.39
   0  -5  -4  879.61   48.30
   0  -5  -4  863.51   46.70
   0  -5  -4  879.21   46.90
   0   5   4  848.52   47.00
   0   5   4  915.31   44.30
   0   5   4  810.72   45.80
   0   5   4  835.22   47.90
   0   5   4  887.21   43.80
   0   5   4  934.91   47.90
  -1  -5  -4 1332.97   68.19
  -1  -5  -4 1350.56   65.99
   1   5   4 1426.26   67.89
   1   5   4 1484.85   65.69
   1   5   4 1339.07   66.19
   1   5   4 1443.36   65.09
   1   5   4 1424.06   67.39
   1   5   4 1408.16   69.59
  -2  -5  -4   38.10    8.60
  -2  -5  -4   38.70   11.40
  -2  -5  -4   31.70    9.50
  -2  -5  -4   14.40   12.20
   2   5   4   26.20    8.50
   2   5   4   25.60    8.50
   2   5   4   28.00    8.60
   2   5   4   17.40    9.00
   2   5   4   35.10    8.30
   2   5   4   26.10   13.50
  -3  -5  -4  575.14   35.30
  -3  -5  -4  571.14   34.80
  -3  -5  -4  555.34   38.80
  -3  -5  -4  615.04   34.50
  -3  -5  -4  562.94   31.90
   3   5   4  643.64   37.30
   3   5   4  606.34   33.00
   3   5   4  497.65   45.10
   3   5   4  625.74   35.50
   3   5   4  638.64   35.20
  -4  -5  -4  450.55   33.40
  -4  -5  -4  468.25   31.20
  -4  -5  -4  478.95   31.10
  -4  -5  -4  466.45   29.10
  -4  -5  -4  469.55   37.00
  -4  -5  -4  435.46   30.50
  -4  -5  -4  423.56   27.60
   4   5   4  539.15   32.80
   4   5   4  495.25   32.80
   4   5   4  512.35   37.50
   4   5   4  510.25   30.60
   4   5   4  536.15   43.90
   4   5   4  541.85   33.30
  -5  -5  -4  708.63   38.40
  -5  -5  -4  705.83   41.00
  -5  -5  -4  763.22   43.40
  -5  -5  -4  660.33   48.70
  -5  -5  -4  752.42   42.10
  -5  -5  -4  719.23   41.00
   5   5   4  698.33   41.80
   5   5   4  777.82   45.60
   5   5   4  800.72   45.50
   5   5   4  734.83   45.00
  -6  -5  -4  287.87   25.30
  -6  -5  -4  259.27   38.40
  -6  -5  -4  265.37   25.00
  -6  -5  -4  291.57   23.20
  -6  -5  -4  244.88   26.10
  -6  -5  -4  280.07   21.20
   6   5   4  299.57   31.70
   6   5   4  305.57   25.30
  -7  -5  -4  218.88   19.40
  -7  -5  -4  250.47   18.10
  -7  -5  -4  242.38   22.70
   7   5   4  215.88   19.30
   7   5   4  186.68   20.80
   2  -6  -4  151.98   18.40
   2  -6  -4  160.18   17.00
  -2   6   4  140.69   15.00
  -2   6   4  147.49   20.60
  -2   6   4  131.39   16.80
   1  -6  -4   13.30   10.90
   1  -6  -4    3.30    8.20
   1  -6  -4   10.60    8.50
   1  -6  -4   -1.30   12.90
  -1   6   4    6.70   18.80
  -1   6   4    3.30   12.10
  -1   6   4    2.10    7.30
  -1   6   4   16.60    8.80
   0  -6  -4  342.67   28.10
   0  -6  -4  345.27   25.90
   0  -6  -4  338.67   31.80
   0  -6  -4  294.07   33.80
   0   6   4  379.06   25.10
   0   6   4  398.46   31.70
   0   6   4  321.47   29.70
   0   6   4  320.37   33.70
   0   6   4  381.46   24.10
   0   6   4  360.76   36.70
  -1  -6  -4  298.87   36.80
  -1  -6  -4  367.76   30.70
  -1  -6  -4  402.96   28.70
   1   6   4  419.76   31.00
   1   6   4  319.47   30.70
   1   6   4  407.06   26.00
   1   6   4  419.46   31.40
   1   6   4  443.26   33.30
   1   6   4  416.06   25.50
   1   6   4  385.36   30.90
  -2  -6  -4  108.29   18.80
  -2  -6  -4  115.69   16.00
   2   6   4  102.89   14.00
   2   6   4   86.49   15.60
   2   6   4   83.69   15.00
   2   6   4   96.59   17.50
   2   6   4   70.09   14.20
  -3  -6  -4  210.18   24.10
  -3  -6  -4  186.78   23.90
   3   6   4  226.28   37.80
   3   6   4  200.88   20.00
   3   6   4  199.88   21.80
   3   6   4  222.78   22.70
   3   6   4  211.38   23.50
  -4  -6  -4  410.36   28.60
  -4  -6  -4  426.36   29.80
  -4  -6  -4  407.16   32.90
  -4  -6  -4  428.56   30.70
   4   6   4  416.96   30.00
   4   6   4  443.86   33.10
   4   6   4  438.06   28.10
   4   6   4  387.46   37.40
   4   6   4  451.35   32.60
  -5  -6  -4  187.78   21.40
  -5  -6  -4  164.08   20.50
  -5  -6  -4  181.08   26.00
  -5  -6  -4  190.18   20.20
   5   6   4  134.49   19.70
   5   6   4  141.19   25.40
   5   6   4  156.08   22.60
   5   6   4  155.98   24.20
  -6  -6  -4  270.37   24.30
  -6  -6  -4  242.28   25.10
  -6  -6  -4  272.97   21.10
  -6  -6  -4  254.67   30.00
   6   6   4  265.97   23.80
   6   6   4  258.67   33.20
  -7  -6  -4  258.07   17.70
  -7  -6  -4  227.98   22.50
  -7  -6  -4  257.37   30.80
   7   6   4  235.88   19.00
   7   6   4  231.28   20.60
   1  -7  -4   66.19   10.60
   1  -7  -4   84.69   14.60
  -1   7   4   97.99   15.60
  -1   7   4   90.99   12.20
  -1   7   4   80.19   12.60
   0  -7  -4   78.59   13.10
   0  -7  -4   68.49   16.00
   0  -7  -4   48.40    9.60
   0  -7  -4   57.69    9.70
   0   7   4   67.29   18.00
   0   7   4   62.69   10.30
   0   7   4   79.59   13.10
   0   7   4   61.29   13.00
  -1  -7  -4   75.79   14.30
  -1  -7  -4   89.19   15.40
  -1  -7  -4   51.39   20.00
   1   7   4   66.89   12.00
   1   7   4   71.19   17.10
   1   7   4   72.09   13.70
   1   7   4   67.09   11.70
  -2  -7  -4    0.30   13.70
  -2  -7  -4   -9.50    8.80
   2   7   4   -3.10    8.40
   2   7   4    1.20   10.40
   2   7   4  -19.80   18.30
   2   7   4   -0.50   11.70
   2   7   4   -0.20    7.40
  -3  -7  -4  128.29   18.50
   3   7   4  111.99   17.80
   3   7   4   87.89   14.90
   3   7   4   93.79   15.20
   3   7   4   74.09   16.00
   3   7   4   79.89   20.00
  -4  -7  -4  281.07   25.90
  -4  -7  -4  275.97   25.30
   4   7   4  295.67   34.70
   4   7   4  306.97   24.60
   4   7   4  288.47   30.90
   4   7   4  304.97   23.50
  -5  -7  -4  224.98   26.90
  -5  -7  -4  212.98   20.90
  -5  -7  -4  219.68   22.90
  -5  -7  -4  218.18   19.60
  -5  -7  -4  159.38   26.30
   5   7   4  221.18   30.00
   5   7   4  201.18   19.60
   5   7   4  192.18   26.00
  -6  -7  -4   87.19   14.10
  -6  -7  -4   94.29   15.90
  -6  -7  -4   63.29   10.10
   6   7   4   53.59   11.30
   6   7   4   70.39   11.10
  -7  -7  -4   39.30   11.70
  -7  -7  -4   42.90    7.30
   7   7   4   45.80   10.20
   7   7   4   49.70    8.50
   0  -8  -4   27.70    7.60
   0  -8  -4   24.70    7.70
   0   8   4   27.30    7.30
   0   8   4   25.10    9.20
   0   8   4   36.90   12.20
  -1  -8  -4   62.29    8.30
  -1  -8  -4   57.79   10.80
  -1  -8  -4   61.99    9.60
   1   8   4   47.70   10.30
   1   8   4   62.39   12.30
   1   8   4   45.50    8.60
  -2  -8  -4  147.79   14.80
  -2  -8  -4  152.08   15.70
   2   8   4  179.88   18.60
   2   8   4  170.58   28.90
   2   8   4  197.98   16.60
   2   8   4  175.28   20.50
  -3  -8  -4  316.87   20.80
  -3  -8  -4  340.07   22.80
   3   8   4  296.87   23.10
   3   8   4  307.77   22.10
   3   8   4  263.27   32.00
   3   8   4  276.97   27.30
  -4  -8  -4   13.90    8.00
  -4  -8  -4   16.50    6.50
   4   8   4   14.20   11.00
   4   8   4   12.80   19.80
   4   8   4   -0.80   16.90
  -5  -8  -4   34.60    8.80
  -5  -8  -4   48.90    9.50
   5   8   4   43.00    8.80
   5   8   4   53.59   14.30
  -6  -8  -4   57.49    9.30
   6   8   4   45.40    8.50
   6   8   4   56.89   11.40
  -3  -9  -4  211.58   14.80
  -3  -9  -4  228.38   14.70
   3   9   4  216.18   17.80
  -4  -9  -4   33.20    6.90
  -4  -9  -4   33.20    6.70
   4   9   4   27.80    7.40
   5   8  -5   76.39   11.10
  -5  -8   5   43.60    7.00
  -5  -8   5   49.70    8.00
   4   8  -5   97.89   12.70
   4   8  -5   90.09   13.70
   4   8  -5  100.39   14.60
  -4  -8   5  101.39   14.50
  -4  -8   5   77.89   10.90
  -4  -8   5   96.19   11.20
   3   8  -5   32.90   10.40
   3   8  -5   26.60   10.30
   3   8  -5   31.30    8.00
  -3  -8   5   27.30    7.40
  -3  -8   5   34.00   10.50
   2   8  -5  169.68   23.70
   2   8  -5  173.98   17.50
   2   8  -5  195.88   16.40
  -2  -8   5  203.48   15.20
   1   8  -5   64.09   10.20
   1   8  -5   50.79    8.60
  -1  -8   5   67.39    9.90
  -1  -8   5   50.49   16.60
  -1  -8   5   31.10   10.40
   0   8  -5    0.60    7.50
   0  -8   5    2.80    6.40
   0  -8   5    7.50   14.00
   0  -8   5    6.80    5.20
   6   7  -5   43.90    7.60
   6   7  -5   79.19   17.70
  -6  -7   5   72.29   11.10
  -6  -7   5   64.19   10.40
   5   7  -5  147.79   16.30
   5   7  -5  121.99   20.10
   5   7  -5  173.78   16.80
  -5  -7   5  134.59   15.20
  -5  -7   5  138.29   16.30
   4   7  -5   41.30   11.40
   4   7  -5   57.49   10.00
   4   7  -5   64.49   12.50
  -4  -7   5   64.99   11.80
  -4  -7   5   54.59    9.80
  -4  -7   5   72.29   13.00
   3   7  -5  455.35   30.60
   3   7  -5  434.66   27.80
   3   7  -5  437.36   35.80
  -3  -7   5  394.16   25.60
  -3  -7   5  407.46   29.50
  -3  -7   5  386.46   26.10
   2   7  -5  325.97   31.10
   2   7  -5  366.96   24.50
   2   7  -5  355.16   24.70
   2   7  -5  299.97   33.00
  -2  -7   5  426.46   24.90
  -2  -7   5  327.47   28.80
  -2  -7   5  402.56   35.70
   1   7  -5   73.99   17.90
   1   7  -5   79.69   13.80
  -1  -7   5   60.19   14.30
  -1  -7   5   67.79   19.30
  -1  -7   5   73.69   13.40
  -1  -7   5   79.69   11.80
   0   7  -5    6.00    8.00
   0   7  -5   11.10    8.40
   0   7  -5   -0.40   19.10
   0  -7   5   19.30    7.70
   0  -7   5  -12.00   14.20
   0  -7   5    7.50    8.50
   0  -7   5   12.00   10.60
  -1   7  -5   49.99   10.50
  -1   7  -5   56.59   11.10
   1  -7   5   43.90    8.20
   1  -7   5   28.30    8.50
   1  -7   5   28.80    7.40
   6   6  -5  100.99   12.70
   6   6  -5   90.39   15.70
  -6  -6   5  104.89   15.30
   5   6  -5  293.97   36.20
   5   6  -5  244.98   28.60
   5   6  -5  240.28   20.40
   5   6  -5  211.78   28.30
   5   6  -5  252.67   22.40
  -5  -6   5  220.68   22.00
  -5  -6   5  232.48   23.90
  -5  -6   5  239.48   24.30
   4   6  -5  601.24   36.50
   4   6  -5  625.24   40.90
   4   6  -5  595.44   33.40
   4   6  -5  576.44   34.50
   4   6  -5  551.14   43.50
  -4  -6   5  583.14   37.00
  -4  -6   5  587.94   37.80
  -4  -6   5  577.64   35.80
  -4  -6   5  596.84   37.70
  -4  -6   5  614.04   43.80
   3   6  -5  125.79   14.80
   3   6  -5  115.19   15.10
   3   6  -5  113.69   18.90
   3   6  -5   97.59   17.40
   3   6  -5  152.68   22.60
  -3  -6   5  115.99   19.60
  -3  -6   5  112.99   17.50
   2   6  -5   91.99   13.30
   2   6  -5   60.79   13.70
   2   6  -5   73.39   11.30
   2   6  -5   70.29   17.60
  -2  -6   5   51.79   16.70
  -2  -6   5   64.69   19.30
  -2  -6   5   75.59   11.90
  -2  -6   5   76.89   11.70
  -2  -6   5   38.90   14.70
   1   6  -5  120.09   15.40
   1   6  -5  114.69   18.20
   1   6  -5  104.69   14.10
  -1  -6   5  136.29   22.90
  -1  -6   5   93.09   15.40
  -1  -6   5   82.79   21.80
  -1  -6   5  130.09   16.60
  -1  -6   5   98.79   16.00
   0   6  -5   -1.80   12.60
   0   6  -5    1.70    9.80
   0  -6   5    4.00    8.20
   0  -6   5   18.70   10.90
   0  -6   5  -13.30   15.70
   0  -6   5   -2.20   13.70
   0  -6   5    5.60    9.90
  -1   6  -5  188.58   20.70
  -1   6  -5  187.88   31.10
  -1   6  -5  178.38   16.90
   1  -6   5  180.68   19.80
   1  -6   5  187.18   23.90
   1  -6   5  189.98   20.10
   1  -6   5  202.28   18.70
  -2   6  -5   49.20   11.20
   2  -6   5   86.69   14.50
   2  -6   5   59.59   11.10
   2  -6   5   63.69   12.70
   3  -6   5   97.19   15.50
   3  -6   5  120.49   12.50
   3  -6   5  104.79   12.10
   7   5  -5   77.29   13.00
  -7  -5   5   52.59   10.30
  -7  -5   5   70.09   11.10
  -7  -5   5   76.99   12.00
   6   5  -5   61.19   10.50
   6   5  -5   59.39   15.00
   6   5  -5   74.49   14.30
  -6  -5   5   77.49   15.00
  -6  -5   5   71.79   15.10
  -6  -5   5   77.49   10.90
  -6  -5   5   83.19   13.20
   5   5  -5  128.29   18.70
   5   5  -5  118.69   22.40
   5   5  -5  132.79   20.20
   5   5  -5  126.09   18.80
  -5  -5   5  109.69   18.10
  -5  -5   5  111.59   20.10
  -5  -5   5   85.99   13.20
  -5  -5   5   85.29   23.60
  -5  -5   5   75.19   13.10
   4   5  -5 1375.36   76.29
   4   5  -5 1469.15   72.69
   4   5  -5 1527.75   74.59
   4   5  -5 1488.55   71.69
   4   5  -5 1564.24   77.79
  -4  -5   5 1612.04   76.09
  -4  -5   5 1653.73   78.99
  -4  -5   5 1564.74   75.89
  -4  -5   5 1494.15   72.69
  -4  -5   5 1607.14   74.59
   3   5  -5   97.19   17.60
   3   5  -5   70.69   13.00
   3   5  -5   93.69   17.30
   3   5  -5   78.59   13.00
   3   5  -5  104.79   16.10
  -3  -5   5   53.89   11.50
  -3  -5   5   60.89   12.80
  -3  -5   5   45.50    9.30
  -3  -5   5   81.19   15.20
  -3  -5   5   36.80   11.80
   2   5  -5   47.80    9.30
   2   5  -5   45.10   10.50
   2   5  -5   40.40   17.20
   2   5  -5   59.59   10.20
   2   5  -5   37.80   13.40
  -2  -5   5   59.39   11.00
  -2  -5   5   39.10   11.20
  -2  -5   5   45.60   13.40
  -2  -5   5   61.79   17.30
  -2  -5   5   48.10   11.60
   1   5  -5   60.69   10.10
   1   5  -5   45.10   10.30
   1   5  -5   43.60   11.80
   1   5  -5   63.99   10.20
  -1  -5   5   63.99   15.10
  -1  -5   5   48.70   11.90
  -1  -5   5   58.39   14.00
  -1  -5   5   32.00   12.90
  -1  -5   5   51.39   12.00
  -1  -5   5   51.29    9.20
  -1  -5   5   41.10   10.00
   0   5  -5   12.80   12.30
   0   5  -5   16.60   10.20
   0   5  -5    9.80    6.30
   0   5  -5    0.70   10.70
   0  -5   5   12.60   10.80
   0  -5   5    6.70   10.40
   0  -5   5   15.10   11.70
   0  -5   5  -24.30   13.40
   0  -5   5    7.60   10.60
   0  -5   5   27.30   13.90
   0  -5   5   -0.90    8.80
  -1   5  -5  485.25   34.20
  -1   5  -5  479.45   26.30
   1  -5   5  457.25   35.60
   1  -5   5  449.95   35.60
   1  -5   5  439.36   33.70
   1  -5   5  486.55   32.40
   1  -5   5  521.35   33.20
   1  -5   5  454.45   29.30
   1  -5   5  455.95   33.90
  -2   5  -5  211.08   18.60
   2  -5   5  213.08   21.70
   2  -5   5  220.08   27.30
   2  -5   5  219.88   22.70
   2  -5   5  275.97   24.80
   2  -5   5  242.98   24.40
   2  -5   5  224.28   22.60
  -3   5  -5  115.89   17.80
   3  -5   5  142.19   17.10
   3  -5   5  140.69   16.60
   3  -5   5  147.59   17.50
   3  -5   5  143.89   17.20
   7   4  -5  194.78   16.70
  -7  -4   5  204.38   14.90
  -7  -4   5  197.58   22.30
   6   4  -5  119.29   20.40
   6   4  -5  141.09   18.10
   6   4  -5  133.19   20.50
  -6  -4   5  157.38   23.50
  -6  -4   5   87.09   15.90
  -6  -4   5  113.79   15.70
  -6  -4   5   89.79   16.10
   5   4  -5  387.26   35.50
   5   4  -5  368.76   28.80
   5   4  -5  389.26   32.70
  -5  -4   5  437.56   29.60
  -5  -4   5  465.05   31.00
  -5  -4   5  426.26   34.20
  -5  -4   5  433.16   28.20
   4   4  -5  695.93   41.50
   4   4  -5  604.24   49.60
   4   4  -5  676.93   41.70
   4   4  -5  701.43   38.20
   4   4  -5  730.33   42.80
   4   4  -5  706.03   43.80
   4   4  -5  685.83   38.70
  -4  -4   5  783.72   40.40
  -4  -4   5  823.52   42.50
  -4  -4   5  780.82   44.30
   3   4  -5   85.69   11.70
   3   4  -5   87.19   12.40
   3   4  -5   69.29   14.20
   3   4  -5   84.89   13.50
   3   4  -5   79.59   13.60
   3   4  -5   68.69   12.50
  -3  -4   5   63.39   13.70
  -3  -4   5   54.59   10.60
  -3  -4   5   75.09   12.30
  -3  -4   5   64.49   11.30
   2   4  -5  529.45   29.80
   2   4  -5  440.56   25.70
   2   4  -5  511.35   30.80
   2   4  -5  481.95   27.40
   2   4  -5  514.55   27.00
  -2  -4   5  515.15   29.70
  -2  -4   5  506.35   29.50
  -2  -4   5  518.05   27.90
   1   4  -5    5.10    6.40
   1   4  -5    7.60    5.50
   1   4  -5    6.50    5.00
   1   4  -5   13.70    8.70
  -1  -4   5    4.40    6.20
  -1  -4   5    0.80    7.90
   0   4  -5   13.80    7.30
   0   4  -5   18.70    5.80
   0   4  -5   12.30    6.30
   0  -4   5   11.70    6.50
   0  -4   5   14.50    7.80
  -1   4  -5  360.36   23.80
  -1   4  -5  296.97   18.40
   1  -4   5  331.67   29.20
   1  -4   5  316.27   24.00
   1  -4   5  346.67   26.90
   1  -4   5  313.77   24.80
   1  -4   5  294.47   23.20
   1  -4   5  356.36   29.30
   1  -4   5  323.77   27.90
  -2   4  -5   31.30    8.70
  -2   4  -5   23.10   13.90
   2  -4   5   48.40   14.20
   2  -4   5   83.69   16.40
   2  -4   5   73.29   13.90
   2  -4   5   52.09   12.50
   2  -4   5   44.60   11.80
  -3   4  -5  162.28   17.30
   3  -4   5  179.28   20.10
   3  -4   5  156.88   20.30
   3  -4   5  167.58   21.10
   3  -4   5  179.18   24.80
   3  -4   5  182.38   21.00
   3  -4   5  149.29   28.40
  -4   4  -5   27.80   11.00
   4  -4   5   35.80    9.60
   4  -4   5   23.80    7.80
   4  -4   5   34.20    9.60
   4  -4   5   44.20   10.60
   7   3  -5   91.49   12.10
  -7  -3   5   79.79   11.10
  -7  -3   5   39.00   19.10
   6   3  -5   41.10   11.50
   6   3  -5   57.29   13.50
  -6  -3   5   72.49   18.30
  -6  -3   5   68.39   15.10
  -6  -3   5   50.79    9.70
  -6  -3   5   57.19   15.30
   5   3  -5   62.49   14.10
   5   3  -5   76.89   17.20
   5   3  -5   68.99   13.30
  -5  -3   5    2.10   24.70
  -5  -3   5  108.29   17.30
  -5  -3   5  100.79   16.90
   4   3  -5  173.78   18.80
   4   3  -5  194.68   29.90
   4   3  -5  150.78   17.80
   4   3  -5  162.18   20.60
   4   3  -5  144.49   17.80
   4   3  -5  165.38   16.80
   4   3  -5  154.08   20.10
  -4  -3   5  140.39   16.90
  -4  -3   5  119.49   18.30
  -4  -3   5  116.59   17.90
  -4  -3   5  137.19   19.40
  -4  -3   5  150.28   26.20
  -4  -3   5  130.89   15.20
   3   3  -5  141.39   13.40
   3   3  -5  143.39   14.40
   3   3  -5  160.78   15.50
   3   3  -5  141.79   14.80
   3   3  -5  155.48   15.70
  -3  -3   5  177.48   14.30
  -3  -3   5  190.38   16.30
  -3  -3   5  170.18   15.80
   2   3  -5 5571.84  237.48
   2   3  -5 5046.60  233.58
   2   3  -5 5261.87  234.98
   2   3  -5 5670.93  235.28
   2   3  -5 5696.53  238.08
   2   3  -5 5728.73  237.78
  -2  -3   5 5572.44  237.58
  -2  -3   5 5772.32  238.08
  -2  -3   5 5616.34  236.48
   1   3  -5  764.32   34.00
   1   3  -5  731.13   36.10
   1   3  -5  706.93   32.80
  -1  -3   5  743.63   36.80
  -1  -3   5  694.43   36.70
   0   3  -5   63.49    7.10
   0   3  -5   67.49    9.70
   0   3  -5   58.69   10.20
   0  -3   5   70.39    9.00
   0  -3   5   64.69    5.00
   0  -3   5   63.89    9.10
  -1   3  -5  116.59   11.40
  -1   3  -5  133.29   12.60
   1  -3   5  145.09   13.20
   1  -3   5  156.48   13.20
  -2   3  -5  238.68   18.90
  -2   3  -5  191.58   20.60
  -2   3  -5  183.18   18.70
   2  -3   5  225.18   24.90
   2  -3   5  229.68   19.10
   2  -3   5  230.58   22.90
   2  -3   5  224.28   18.90
   2  -3   5  195.48   22.50
   2  -3   5  223.18   26.50
   2  -3   5  245.48   25.80
  -3   3  -5  860.91   51.09
  -3   3  -5  872.61   51.99
  -3   3  -5  869.81   43.60
   3  -3   5  949.51   51.99
   3  -3   5 1024.60   53.79
   3  -3   5  958.00   51.39
   3  -3   5  929.61   51.19
   3  -3   5  952.90   50.99
   3  -3   5  942.21   51.79
   3  -3   5  962.70   51.89
  -4   3  -5  141.29   17.20
   4  -3   5  131.59   18.70
   4  -3   5  139.69   20.90
   4  -3   5  116.29   19.40
   4  -3   5  128.99   20.60
   4  -3   5  138.99   19.30
  -5   3  -5   -4.50   10.30
  -5   3  -5  -16.70    9.80
   5  -3   5    5.10    7.10
   5  -3   5    6.00    8.00
   5  -3   5   11.40    7.80
   7   2  -5   82.39   10.70
   7   2  -5   65.79   10.00
  -7  -2   5   75.79   10.40
   6   2  -5  353.26   27.90
  -6  -2   5  425.66   27.30
  -6  -2   5  421.26   25.50
  -6  -2   5  406.66   29.60
  -6  -2   5  461.75   44.20
   5   2  -5  151.48   23.00
   5   2  -5  126.49   21.80
  -5  -2   5   88.19   22.50
  -5  -2   5  138.19   15.50
  -5  -2   5  139.19   19.40
  -5  -2   5  146.29   21.00
  -5  -2   5  134.39   19.20
  -5  -2   5  174.98   19.60
  -5  -2   5  157.98   25.90
  -5  -2   5  150.68   18.70
   4   2  -5 1414.76   70.69
   4   2  -5 1659.23   76.49
   4   2  -5 1565.64   73.19
   4   2  -5 1553.24   78.39
   4   2  -5 1543.95   73.69
  -4  -2   5 1603.84   73.49
  -4  -2   5 1601.24   73.29
  -4  -2   5 1572.34   71.59
  -4  -2   5 1521.75   70.39
  -4  -2   5 1521.15   71.79
  -4  -2   5 1536.45   79.29
  -4  -2   5 1559.64   74.59
   3   2  -5  460.95   26.60
   3   2  -5  438.96   24.60
   3   2  -5  430.06   24.60
   3   2  -5  429.36   25.00
   3   2  -5  444.86   25.10
  -3  -2   5  388.36   24.00
  -3  -2   5  426.86   25.50
  -3  -2   5  411.76   25.70
  -3  -2   5  437.76   24.30
  -3  -2   5  430.26   25.60
  -3  -2   5  427.16   22.70
   2   2  -5  119.09   10.70
   2   2  -5  131.39   11.00
   2   2  -5  124.89   10.40
   2   2  -5  124.89   11.20
  -2  -2   5  126.09   10.50
  -2  -2   5  135.79    8.30
  -2  -2   5  135.19   12.40
   1   2  -5  844.92   40.30
   1   2  -5  895.41   41.20
   1   2  -5  885.11   39.30
  -1  -2   5  867.01   40.30
  -1  -2   5  817.02   42.00
  -1  -2   5  863.01   41.50
  -1  -2   5  897.71   41.20
   0   2  -5 2212.78  100.49
   0   2  -5 2157.48   98.39
   0   2  -5 2387.46  101.99
   0  -2   5 2418.56  102.19
   0  -2   5 2452.35   99.39
   0  -2   5 2384.36  101.59
  -1   2  -5  748.03   37.20
   1  -2   5  771.22   37.60
   1  -2   5  826.82   38.50
  -2   2  -5 1434.26   64.99
  -2   2  -5 1482.25   64.89
   2  -2   5 1412.26   66.79
   2  -2   5 1408.76   66.59
  -3   2  -5  462.95   29.30
  -3   2  -5  390.46   23.30
   3  -2   5  493.35   33.70
   3  -2   5  469.75   32.80
   3  -2   5  455.85   31.60
   3  -2   5  461.55   33.20
   3  -2   5  454.55   28.90
   3  -2   5  441.36   32.70
   3  -2   5  440.56   31.60
  -4   2  -5    7.70   14.00
  -4   2  -5   31.50    8.00
   4  -2   5   22.00   11.80
   4  -2   5   30.40   12.00
   4  -2   5   27.90   14.70
   4  -2   5   17.50   13.50
   4  -2   5   26.50   11.00
   4  -2   5   28.50   13.50
  -5   2  -5    9.80   10.60
  -5   2  -5   30.70    9.60
   5  -2   5   15.80    8.30
   5  -2   5   35.80   11.00
   5  -2   5   29.70   10.30
   5  -2   5   57.49   12.30
  -6   2  -5   58.79    9.10
   6  -2   5   68.29   10.70
   6  -2   5   85.79   11.50
   6  -2   5   78.49   11.20
   6   1  -5  637.24   36.20
  -6  -1   5  598.04   37.00
  -6  -1   5  591.74   36.40
  -6  -1   5  652.23   35.70
  -6  -1   5  624.84   33.10
   5   1  -5  743.33   44.50
   5   1  -5  720.73   46.00
  -5  -1   5  602.74   59.49
  -5  -1   5  780.42   42.10
  -5  -1   5  756.42   38.70
  -5  -1   5  794.62   40.80
  -5  -1   5  729.13   45.30
  -5  -1   5  783.02   42.50
   4   1  -5 1195.68   58.09
   4   1  -5 1027.20   55.79
   4   1  -5 1161.48   59.79
  -4  -1   5 1126.49   56.09
  -4  -1   5 1150.58   56.99
  -4  -1   5 1025.50   67.69
  -4  -1   5 1160.48   55.49
  -4  -1   5 1192.28   54.79
  -4  -1   5 1136.99   56.49
  -4  -1   5 1178.28   53.99
   3   1  -5  119.29   12.40
   3   1  -5  123.29   13.70
   3   1  -5  123.69   14.80
   3   1  -5  123.89   12.40
  -3  -1   5  132.29   12.00
  -3  -1   5  134.29   11.50
  -3  -1   5  133.89   12.40
  -3  -1   5  130.59   12.30
  -3  -1   5  112.29   13.40
   2   1  -5 7780.92  332.47
   2   1  -5 7857.41  331.37
   2   1  -5 8202.48  333.17
   2   1  -5 7538.85  332.37
  -2  -1   5 8174.58  331.97
  -2  -1   5 7449.05  332.37
  -2  -1   5 8017.30  332.87
  -2  -1   5 7953.30  330.67
   1   1  -5  547.75   25.50
   1   1  -5  576.44   26.20
   1   1  -5  583.84   26.20
  -1  -1   5  462.85   23.40
  -1  -1   5  494.65   25.30
  -1  -1   5  495.15   27.70
  -1  -1   5  495.05   25.50
   0   1  -5 5108.79  215.98
   0   1  -5 5133.59  216.18
   0  -1   5 5143.58  215.48
   0  -1   5 5060.29  216.38
  -1   1  -5 2067.59   89.59
  -1   1  -5 1975.30   89.19
   1  -1   5 2139.79   90.99
   1  -1   5 2117.39   89.69
  -2   1  -5 1160.98   51.49
  -2   1  -5 1139.59   49.30
  -2   1  -5 1037.70   48.90
   2  -1   5 1108.99   52.49
   2  -1   5 1132.49   51.29
  -3   1  -5  171.88   12.60
  -3   1  -5  187.18   16.00
  -3   1  -5  160.28   15.30
   3  -1   5  197.78   15.40
  -4   1  -5   45.50   12.50
  -4   1  -5   69.89   11.30
   4  -1   5   94.09   14.80
   4  -1   5   79.79   15.20
   4  -1   5   82.59   15.00
   4  -1   5   70.59   13.80
   4  -1   5   81.89   19.80
   4  -1   5   95.99   15.20
  -5   1  -5  237.58   20.80
  -5   1  -5  262.07   19.50
  -5   1  -5  220.28   31.60
   5  -1   5  277.37   25.10
   5  -1   5  266.67   38.30
   5  -1   5  266.87   25.40
   5  -1   5  276.97   22.80
   5  -1   5  263.67   25.10
  -6   1  -5  171.28   17.30
  -6   1  -5  164.68   16.60
   6  -1   5  175.68   17.50
   6  -1   5  206.08   18.70
   6  -1   5  187.98   17.90
   6   0  -5  496.45   27.70
   6   0  -5  520.05   30.20
  -6   0   5  433.56   29.60
  -6   0   5  441.16   30.70
  -6   0   5  469.65   28.40
  -6   0   5  476.65   26.70
   5   0  -5  162.98   20.60
  -5   0   5  147.59   16.90
  -5   0   5  195.88   21.00
  -5   0   5  167.38   19.00
  -5   0   5  175.88   26.60
  -5   0   5  150.78   15.80
   4   0  -5  115.39   18.60
   4   0  -5  100.09   16.30
   4   0  -5  114.69   17.00
  -4   0   5   89.19   16.20
  -4   0   5   91.49   12.50
  -4   0   5   96.59   13.00
  -4   0   5  118.89   18.30
   3   0  -5  113.79   13.00
   3   0  -5   99.59   12.30
  -3   0   5   81.69   10.80
  -3   0   5   87.89   10.90
  -3   0   5   95.89   11.10
  -3   0   5   77.79   11.10
  -3   0   5   98.19   13.90
   2   0  -5 1893.01   83.59
   2   0  -5 1683.63   82.19
   2   0  -5 1889.61   83.79
  -2   0   5 1929.41   83.89
  -2   0   5 1953.10   82.49
  -2   0   5 1903.01   82.59
  -2   0   5 1944.51   83.09
   1   0  -5  850.81   37.30
   1   0  -5  803.42   36.50
   1   0  -5  819.42   37.00
  -1   0   5  727.43   35.60
  -1   0   5  756.92   35.90
   0   0  -5 3237.98  135.79
   0   0  -5 3177.18  135.49
   0   0   5 3125.19  133.09
   0   0   5 3150.38  134.49
   0   0   5 3216.18  135.29
  -1   0  -5 2174.58   93.19
  -1   0  -5 2083.29   92.79
   1   0   5 2219.58   94.19
   1   0   5 2165.18   92.19
   1   0   5 2203.38   92.19
   1   0   5 2189.08   92.69
  -2   0  -5 1116.69   50.29
  -2   0  -5 1224.48   53.49
  -2   0  -5 1067.09   49.60
   2   0   5 1180.58   51.79
   2   0   5 1214.68   53.89
   2   0   5 1214.28   50.99
  -3   0  -5  351.96   20.00
  -3   0  -5  406.26   23.30
  -3   0  -5  367.46   22.00
   3   0   5  416.56   22.00
  -4   0  -5 1054.29   57.09
  -4   0  -5 1076.59   55.19
  -4   0  -5 1130.49   52.89
  -4   0  -5 1049.09   56.59
  -4   0  -5 1038.20   53.69
   4   0   5 1297.47   60.69
   4   0   5 1208.18   56.29
   4   0   5 1219.58   58.89
   4   0   5 1215.88   59.29
  -5   0  -5 1066.49   51.99
  -5   0  -5 1145.89   52.09
   5   0   5  973.90   54.79
   5   0   5 1055.09   56.19
   5   0   5 1071.49   57.59
   5   0   5 1048.70   56.29
   5   0   5 1015.60   56.39
  -6   0  -5  460.05   26.20
  -6   0  -5  467.75   26.90
   6   0   5  379.86   28.50
   6   0   5  374.96   29.10
   6   0   5  401.66   27.80
   6   0   5  422.26   29.50
   6  -1  -5  103.49   13.10
  -6   1   5  117.19   19.00
  -6   1   5   84.59   11.80
  -6   1   5  105.19   13.30
   5  -1  -5   26.50    9.30
   5  -1  -5   21.70   10.10
  -5   1   5   20.80   10.20
  -5   1   5   30.60    9.90
  -5   1   5   17.40    7.40
  -5   1   5   25.20    9.90
   4  -1  -5   85.69   17.70
   4  -1  -5   95.29   18.00
   4  -1  -5   84.69   14.50
  -4   1   5   63.29   12.30
  -4   1   5   94.59   15.10
  -4   1   5  101.49   12.90
  -4   1   5   93.79   13.20
  -4   1   5   75.79   14.50
   3  -1  -5  454.05   33.70
   3  -1  -5  466.25   28.60
   3  -1  -5  484.45   29.40
   3  -1  -5  426.26   28.40
  -3   1   5  488.85   28.70
  -3   1   5  505.65   28.20
  -3   1   5  500.75   26.50
  -3   1   5  506.05   26.60
   2  -1  -5  417.26   21.70
   2  -1  -5  389.56   21.40
  -2   1   5  334.07   19.90
  -2   1   5  327.17   20.60
  -2   1   5  324.37   18.30
  -2   1   5  364.46   19.90
  -2   1   5  347.57   20.70
   1  -1  -5 2460.35  104.59
   1  -1  -5 2451.55  104.69
   1  -1  -5 2302.97  103.29
  -1   1   5 2405.96  103.09
  -1   1   5 2516.15  104.19
  -1   1   5 2270.37  101.69
  -1   1   5 2343.17  103.09
  -1   1   5 2449.05  104.09
   0  -1  -5  483.25   24.30
   0  -1  -5  481.95   22.50
   0  -1  -5  499.65   24.60
   0   1   5  505.75   25.70
   0   1   5  498.75   23.10
   0   1   5  504.45   24.10
   0   1   5  524.65   23.30
  -1  -1  -5  684.43   31.90
  -1  -1  -5  692.53   31.60
  -1  -1  -5  697.23   32.40
   1   1   5  677.53   32.10
   1   1   5  682.03   32.70
   1   1   5  736.83   32.40
   1   1   5  673.23   31.20
  -2  -1  -5 1800.92   77.99
  -2  -1  -5 1836.72   80.49
  -2  -1  -5 1608.54   77.09
  -2  -1  -5 1795.92   78.39
   2   1   5 1899.31   77.59
   2   1   5 1844.92   79.39
   2   1   5 1946.01   80.09
   2   1   5 1941.51   80.79
   2   1   5 1791.42   78.59
   2   1   5 1752.82   78.19
  -3  -1  -5  987.00   47.90
  -3  -1  -5  943.71   46.60
  -3  -1  -5  953.90   45.00
   3   1   5 1004.60   46.30
   3   1   5 1056.89   46.70
   3   1   5  974.50   45.00
  -4  -1  -5  714.83   39.20
  -4  -1  -5  829.42   41.30
  -4  -1  -5  839.72   43.00
  -4  -1  -5  840.92   39.10
  -4  -1  -5  748.03   42.70
   4   1   5  825.72   40.30
  -5  -1  -5  372.46   21.90
  -5  -1  -5  341.87   33.40
  -5  -1  -5  315.07   27.00
  -5  -1  -5  322.87   33.20
  -5  -1  -5  333.87   25.00
  -5  -1  -5  340.47   22.30
   5   1   5  279.77   29.60
   5   1   5  262.27   27.30
   5   1   5  282.17   24.30
   5   1   5  289.67   28.80
   5   1   5  319.97   26.00
   5   1   5  258.27   26.40
  -6  -1  -5  171.28   25.30
  -6  -1  -5  158.68   16.80
  -6  -1  -5  195.08   31.70
  -6  -1  -5  171.28   16.70
   6   1   5  170.28   20.90
   6   1   5  182.28   18.90
   6   1   5  184.98   23.70
   6   1   5  178.38   21.90
  -7  -1  -5   28.00    9.10
  -7  -1  -5   28.00    7.40
  -7  -1  -5   11.50   11.40
   7   1   5   24.10    9.90
   7   1   5   27.80    8.70
   5  -2  -5   59.99   11.20
   5  -2  -5   49.60    8.90
  -5   2   5   74.89   14.00
  -5   2   5   50.59   10.70
  -5   2   5   53.09   11.20
  -5   2   5   61.29    9.50
   4  -2  -5  144.29   22.70
   4  -2  -5  112.09   19.70
   4  -2  -5  135.39   20.30
   4  -2  -5  120.99   19.30
   4  -2  -5  107.99   15.70
   4  -2  -5  117.19   18.50
  -4   2   5  153.98   15.30
  -4   2   5  144.89   15.50
  -4   2   5  141.99   24.40
  -4   2   5  127.09   20.10
  -4   2   5  124.89   17.70
  -4   2   5  174.08   24.70
   3  -2  -5  192.38   24.90
   3  -2  -5  173.38   21.50
   3  -2  -5  225.68   25.10
   3  -2  -5  172.18   23.80
   3  -2  -5  202.18   21.40
   3  -2  -5  205.58   23.90
   3  -2  -5  236.88   25.20
  -3   2   5  214.18   20.00
  -3   2   5  232.48   17.10
  -3   2   5  223.88   20.50
  -3   2   5  240.98   19.70
  -3   2   5  218.38   23.30
  -3   2   5  232.98   17.30
   2  -2  -5  542.75   28.50
   2  -2  -5  532.95   28.80
   2  -2  -5  551.74   28.80
  -2   2   5  453.15   27.00
  -2   2   5  455.35   25.60
  -2   2   5  452.55   27.60
  -2   2   5  460.35   27.60
  -2   2   5  446.56   25.90
   1  -2  -5 3359.16  145.19
   1  -2  -5 3271.87  143.59
   1  -2  -5 3333.47  144.99
  -1   2   5 3369.96  142.99
  -1   2   5 3369.16  144.39
  -1   2   5 3509.55  144.89
  -1   2   5 3347.36  143.99
  -1   2   5 3151.78  147.79
   0  -2  -5 3253.97  139.49
   0  -2  -5 3384.26  139.49
   0  -2  -5 3126.79  136.99
   0  -2  -5 3277.57  137.29
   0   2   5 3125.09  140.79
   0   2   5 3229.88  138.79
   0   2   5 3157.68  138.09
   0   2   5 3282.17  138.99
   0   2   5 3241.88  137.89
  -1  -2  -5   33.00    4.90
  -1  -2  -5   24.20    5.20
  -1  -2  -5   41.10    5.90
  -1  -2  -5   34.00    5.40
   1   2   5   43.20    8.30
   1   2   5   29.50    6.00
   1   2   5   36.50    5.90
   1   2   5   34.30    5.00
  -2  -2  -5  401.36   22.90
  -2  -2  -5  401.16   21.20
  -2  -2  -5  410.36   22.10
  -2  -2  -5  422.86   21.90
   2   2   5  458.35   22.50
   2   2   5  444.36   19.10
   2   2   5  470.75   23.50
   2   2   5  474.95   24.40
   2   2   5  460.55   22.70
  -3  -2  -5  136.29   12.00
  -3  -2  -5  129.79   11.10
  -3  -2  -5  125.39   12.40
   3   2   5  142.39   10.00
   3   2   5  141.19   12.70
   3   2   5  158.48   13.30
   3   2   5  153.18   11.80
   3   2   5  146.79   12.10
  -4  -2  -5  959.60   44.40
  -4  -2  -5  948.91   46.20
  -4  -2  -5  929.21   48.20
  -4  -2  -5  959.20   47.80
  -4  -2  -5  901.71   44.30
   4   2   5  839.82   43.90
   4   2   5  960.40   47.60
   4   2   5  876.51   46.20
  -5  -2  -5  671.53   40.40
  -5  -2  -5  669.73   42.60
  -5  -2  -5  656.43   43.70
  -5  -2  -5  737.83   37.20
  -5  -2  -5  639.94   38.60
  -5  -2  -5  719.03   37.10
   5   2   5  734.13   42.40
   5   2   5  697.23   40.30
   5   2   5  686.13   39.90
   5   2   5  735.83   41.10
   5   2   5  742.03   41.90
  -6  -2  -5  353.36   31.40
  -6  -2  -5  353.16   29.50
  -6  -2  -5  406.36   25.20
  -6  -2  -5  370.36   31.80
  -6  -2  -5  398.76   25.60
   6   2   5  420.26   28.20
   6   2   5  393.96   29.30
   6   2   5  403.56   26.60
   6   2   5  351.46   29.60
  -7  -2  -5   93.19   12.00
  -7  -2  -5   79.89   11.90
  -7  -2  -5  110.49   15.90
   7   2   5   99.39   14.60
   7   2   5   82.89   14.50
   5  -3  -5    6.70    7.00
  -5   3   5    3.00   12.90
  -5   3   5    7.30    8.60
  -5   3   5   12.50    6.10
   4  -3  -5  391.96   28.60
   4  -3  -5  351.46   28.60
   4  -3  -5  364.56   24.80
   4  -3  -5  341.37   29.70
  -4   3   5  388.36   27.80
  -4   3   5  365.16   24.90
  -4   3   5  394.76   23.80
  -4   3   5  350.06   27.70
   3  -3  -5  224.58   21.90
   3  -3  -5  215.68   26.30
   3  -3  -5  237.38   25.20
   3  -3  -5  257.97   24.90
   3  -3  -5  172.28   27.00
   3  -3  -5  202.18   22.50
  -3   3   5  180.68   16.90
  -3   3   5  161.68   23.90
  -3   3   5  190.08   25.00
  -3   3   5  224.18   21.20
  -3   3   5  200.48   17.30
  -3   3   5  195.78   24.00
   2  -3  -5 1695.03   88.69
   2  -3  -5 1928.61   88.59
   2  -3  -5 1847.82   87.89
   2  -3  -5 1822.82   88.89
   2  -3  -5 1913.31   87.69
   2  -3  -5 1866.51   87.79
  -2   3   5 1797.72   87.49
  -2   3   5 1855.71   84.39
  -2   3   5 1898.91   84.29
  -2   3   5 1918.11   86.79
  -2   3   5 1875.21   87.89
  -2   3   5 1954.50   87.79
   1  -3  -5  179.18   15.70
   1  -3  -5  185.88   15.20
   1  -3  -5  192.58   15.80
  -1   3   5  161.88   13.10
  -1   3   5  172.88   14.90
  -1   3   5  163.38   14.60
  -1   3   5  150.98   14.20
  -1   3   5  189.78   15.10
   0  -3  -5 2355.46  101.09
   0  -3  -5 2500.05  106.19
   0  -3  -5 2339.77  105.39
   0  -3  -5 2367.66  103.39
   0  -3  -5 2335.77  101.39
   0   3   5 2281.67  108.89
   0   3   5 2360.16  104.49
   0   3   5 2434.26  104.69
   0   3   5 2415.96  103.49
   0   3   5 2370.26  104.99
  -1  -3  -5 1165.48   53.59
  -1  -3  -5 1170.68   55.29
  -1  -3  -5 1193.68   56.59
  -1  -3  -5 1251.57   55.29
  -1  -3  -5 1284.47   57.39
  -1  -3  -5 1210.18   54.79
   1   3   5 1252.27   56.59
   1   3   5 1255.67   56.69
   1   3   5 1248.08   56.19
   1   3   5 1206.28   59.19
   1   3   5 1269.77   55.49
  -2  -3  -5   65.69    9.40
  -2  -3  -5   64.59    8.50
  -2  -3  -5   71.19    8.40
  -2  -3  -5   59.69    8.30
   2   3   5   90.49   12.70
   2   3   5   79.79    9.80
   2   3   5   71.89   11.00
   2   3   5   96.79    9.50
   2   3   5   88.99   11.00
  -3  -3  -5 1905.81   85.29
  -3  -3  -5 1874.21   85.39
  -3  -3  -5 1925.01   86.39
  -3  -3  -5 1909.11   87.79
  -3  -3  -5 1862.11   87.39
   3   3   5 1938.91   89.09
   3   3   5 2058.19   87.69
   3   3   5 1971.10   86.89
  -4  -3  -5 1231.98   56.89
  -4  -3  -5 1246.18   60.89
  -4  -3  -5 1202.68   58.59
  -4  -3  -5 1215.68   56.89
  -4  -3  -5 1233.18   60.29
   4   3   5 1207.18   59.09
   4   3   5 1157.98   60.89
   4   3   5 1204.28   59.39
  -5  -3  -5  458.85   36.30
  -5  -3  -5  503.55   34.80
  -5  -3  -5  548.85   30.30
  -5  -3  -5  563.64   30.00
  -5  -3  -5  487.35   31.70
  -5  -3  -5  565.84   34.20
   5   3   5  534.95   35.80
   5   3   5  564.54   35.00
   5   3   5  528.65   34.40
   5   3   5  428.16   35.90
  -6  -3  -5  183.68   22.20
  -6  -3  -5  181.58   21.90
  -6  -3  -5  168.28   22.00
  -6  -3  -5  171.68   17.30
  -6  -3  -5  184.48   16.40
   6   3   5  164.58   20.50
   6   3   5  156.88   24.70
   6   3   5  182.28   22.60
  -7  -3  -5   78.59   16.40
  -7  -3  -5  112.49   16.70
  -7  -3  -5   94.79   12.60
  -7  -3  -5  117.29   16.10
   7   3   5  114.79   16.80
   7   3   5  110.09   13.60
   4  -4  -5  668.63   35.90
   4  -4  -5  627.84   35.90
  -4   4   5  662.13   35.80
  -4   4   5  603.64   37.60
  -4   4   5  630.54   35.40
  -4   4   5  683.43   34.20
   3  -4  -5  451.85   32.40
   3  -4  -5  504.35   32.30
   3  -4  -5  521.95   33.60
   3  -4  -5  493.15   28.80
  -3   4   5  450.65   32.50
  -3   4   5  448.16   27.70
  -3   4   5  435.56   31.90
  -3   4   5  442.16   29.10
   2  -4  -5 1843.42   96.59
   2  -4  -5 2197.18   96.79
   2  -4  -5 1935.21   95.39
   2  -4  -5 1991.00   96.39
   2  -4  -5 1955.90   93.49
  -2   4   5 2132.69   97.49
  -2   4   5 2026.70   91.59
  -2   4   5 2044.00   92.49
  -2   4   5 1951.70   95.09
  -2   4   5 2043.90   94.89
  -2   4   5 2063.09   97.99
   1  -4  -5  631.04   37.70
   1  -4  -5  524.25   40.40
   1  -4  -5  658.13   39.80
   1  -4  -5  643.34   36.40
   1  -4  -5  646.14   36.70
  -1   4   5  634.94   36.00
  -1   4   5  587.94   34.60
  -1   4   5  593.24   36.10
  -1   4   5  589.04   32.50
  -1   4   5  614.54   32.90
  -1   4   5  564.54   38.00
   0  -4  -5  468.85   27.90
   0  -4  -5  500.75   29.30
   0   4   5  528.85   29.40
   0   4   5  473.35   26.80
   0   4   5  511.55   27.00
   0   4   5  486.55   28.40
   0   4   5  463.75   28.10
  -1  -4  -5 1630.64   73.19
  -1  -4  -5 1683.13   74.19
  -1  -4  -5 1752.52   77.49
  -1  -4  -5 1666.33   73.39
   1   4   5 1616.84   75.79
   1   4   5 1612.74   76.39
   1   4   5 1702.43   74.99
   1   4   5 1716.23   76.59
   1   4   5 1621.94   74.49
  -2  -4  -5  722.03   35.70
  -2  -4  -5  676.53   36.30
  -2  -4  -5  697.53   37.10
  -2  -4  -5  732.93   36.60
   2   4   5  743.83   37.20
   2   4   5  696.73   35.80
   2   4   5  774.22   38.00
   2   4   5  716.63   41.40
   2   4   5  729.73   36.90
   2   4   5  748.03   37.40
  -3  -4  -5  561.04   30.80
  -3  -4  -5  544.05   28.80
  -3  -4  -5  557.04   29.20
  -3  -4  -5  520.75   30.60
  -3  -4  -5  543.05   28.40
   3   4   5  542.65   30.70
   3   4   5  499.15   34.70
   3   4   5  452.45   28.90
   3   4   5  494.95   30.10
   3   4   5  530.55   30.00
  -4  -4  -5  222.38   17.20
  -4  -4  -5  190.48   16.50
  -4  -4  -5  223.88   16.70
  -4  -4  -5  194.78   21.30
  -4  -4  -5  198.08   18.30
  -4  -4  -5  231.88   20.80
   4   4   5  183.78   21.00
   4   4   5  152.88   18.50
   4   4   5  154.68   17.10
  -5  -4  -5  124.29   19.40
  -5  -4  -5  106.89   15.00
  -5  -4  -5   92.69   23.90
  -5  -4  -5  127.99   16.90
  -5  -4  -5  140.39   14.70
  -5  -4  -5  123.49   14.30
   5   4   5   78.89   14.40
   5   4   5  111.99   17.40
   5   4   5   89.49   18.00
   5   4   5   78.29   17.30
   5   4   5   90.59   19.10
  -6  -4  -5   46.90   10.70
  -6  -4  -5   39.10   11.50
  -6  -4  -5   47.80    8.80
  -6  -4  -5   47.40   12.50
  -6  -4  -5   37.30   11.90
   6   4   5   33.90   16.10
   6   4   5   45.20   11.70
   6   4   5   42.50   12.20
  -7  -4  -5  424.56   29.30
  -7  -4  -5  415.66   31.50
  -7  -4  -5  478.05   28.00
  -7  -4  -5  448.06   26.00
   7   4   5  482.25   27.80
   7   4   5  482.95   29.50
   3  -5  -5  165.28   19.00
   3  -5  -5  180.48   16.90
  -3   5   5  121.49   16.70
  -3   5   5  148.49   14.70
  -3   5   5  141.69   19.00
  -3   5   5  102.99   16.90
   2  -5  -5   43.60   12.70
   2  -5  -5   37.20   13.80
   2  -5  -5   31.30    9.20
   2  -5  -5   46.80   11.70
  -2   5   5   41.20   10.40
  -2   5   5   31.90   12.90
  -2   5   5   45.80    9.10
  -2   5   5   44.30   13.70
   1  -5  -5  260.47   25.80
   1  -5  -5  235.78   22.30
   1  -5  -5  260.07   24.10
   1  -5  -5  235.18   30.30
   1  -5  -5  207.88   28.80
  -1   5   5  249.08   23.80
  -1   5   5  261.57   19.40
  -1   5   5  246.18   25.10
  -1   5   5  221.28   26.40
  -1   5   5  216.38   26.10
  -1   5   5  258.27   19.70
   0  -5  -5  802.92   46.10
   0  -5  -5  806.62   45.50
   0  -5  -5  794.62   46.20
   0   5   5  868.01   46.80
   0   5   5  836.22   46.50
   0   5   5  810.22   44.80
   0   5   5  844.82   46.70
   0   5   5  882.81   43.30
   0   5   5  864.71   42.60
  -1  -5  -5  951.30   51.89
   1   5   5  991.80   47.70
   1   5   5  948.11   49.70
   1   5   5  936.81   50.69
   1   5   5  989.20   47.10
   1   5   5  975.30   49.99
   1   5   5  923.21   48.60
  -2  -5  -5  462.45   29.30
  -2  -5  -5  483.25   27.90
  -2  -5  -5  438.66   33.10
  -2  -5  -5  466.25   26.10
   2   5   5  464.65   28.40
   2   5   5  407.16   27.50
   2   5   5  439.06   26.30
   2   5   5  451.05   29.30
   2   5   5  445.56   28.20
   2   5   5  475.95   32.10
  -3  -5  -5  483.25   27.50
  -3  -5  -5  446.46   27.40
  -3  -5  -5  499.25   34.60
  -3  -5  -5  494.65   29.60
  -3  -5  -5  491.15   30.40
  -3  -5  -5  423.66   29.90
   3   5   5  447.16   31.00
   3   5   5  395.96   38.10
   3   5   5  452.65   28.30
   3   5   5  419.56   40.70
   3   5   5  449.66   29.80
   3   5   5  430.76   29.00
  -4  -5  -5  126.89   15.70
  -4  -5  -5  135.99   15.40
  -4  -5  -5  120.79   17.10
  -4  -5  -5  120.49   21.70
  -4  -5  -5  103.89   19.50
  -4  -5  -5  127.09   19.10
  -4  -5  -5  111.49   15.60
   4   5   5   72.19   20.50
   4   5   5  143.99   20.30
   4   5   5  107.69   15.70
   4   5   5  139.49   18.70
   4   5   5  104.09   18.70
  -5  -5  -5   59.99   12.90
  -5  -5  -5   51.29   13.30
  -5  -5  -5   54.69   12.80
  -5  -5  -5   35.90    9.60
  -5  -5  -5    7.30   19.00
  -5  -5  -5   42.20   11.50
   5   5   5   46.80   23.20
   5   5   5   61.99   13.60
   5   5   5   48.40   13.50
   5   5   5   37.90   14.50
   5   5   5   37.30   13.10
  -6  -5  -5  322.47   26.60
  -6  -5  -5  288.37   40.60
  -6  -5  -5  340.47   25.00
  -6  -5  -5  290.27   21.70
  -6  -5  -5  335.97   27.30
  -6  -5  -5  305.17   27.00
   6   5   5  294.47   35.20
   6   5   5  326.57   26.10
  -7  -5  -5  507.65   33.50
  -7  -5  -5  509.05   28.40
  -7  -5  -5  532.65   29.50
   7   5   5  522.75   30.20
   7   5   5  511.55   31.80
   2  -6  -5   -0.80   10.70
   2  -6  -5   -0.70    6.30
  -2   6   5   -6.40   10.00
  -2   6   5    5.40    6.50
  -2   6   5   10.10   23.00
  -2   6   5    0.90    8.70
   1  -6  -5   83.49   15.30
   1  -6  -5  101.19   16.30
   1  -6  -5   87.79   15.60
  -1   6   5  111.79   20.50
  -1   6   5  106.99   14.60
  -1   6   5  114.79   15.90
  -1   6   5  102.49   14.30
   0  -6  -5  208.78   30.50
   0  -6  -5  267.67   24.20
   0  -6  -5  261.67   22.50
   0   6   5  240.38   20.80
   0   6   5  281.07   30.40
   0   6   5  255.97   20.10
   0   6   5  223.58   32.20
   0   6   5  223.68   27.10
   0   6   5  244.58   25.40
  -1  -6  -5  374.66   28.90
  -1  -6  -5  316.37   29.20
   1   6   5  376.26   30.10
   1   6   5  388.46   32.70
   1   6   5  399.26   26.10
   1   6   5  382.36   30.50
   1   6   5  427.66   30.70
   1   6   5  413.96   25.30
   1   6   5  387.06   31.00
  -2  -6  -5 1596.54   78.69
  -2  -6  -5 1778.72   79.49
  -2  -6  -5 1629.34   76.99
   2   6   5 1595.14   79.99
   2   6   5 1602.84   77.79
   2   6   5 1589.74   74.69
   2   6   5 1590.24   79.29
   2   6   5 1480.35   78.39
  -3  -6  -5   41.60   13.40
  -3  -6  -5   74.39   15.10
   3   6   5   56.79   12.50
   3   6   5   77.49   14.20
   3   6   5   75.49   15.10
   3   6   5   71.19   21.30
   3   6   5   75.09   15.80
  -4  -6  -5  277.27   23.80
  -4  -6  -5  285.57   28.00
  -4  -6  -5  262.07   23.00
  -4  -6  -5  250.57   24.70
   4   6   5  287.87   27.30
   4   6   5  251.57   31.40
   4   6   5  255.57   24.50
   4   6   5  260.57   28.20
  -5  -6  -5  201.58   27.10
  -5  -6  -5  171.78   18.90
  -5  -6  -5  149.09   20.90
  -5  -6  -5  176.48   21.20
   5   6   5  138.99   27.30
   5   6   5  164.28   24.40
   5   6   5  165.08   20.30
  -6  -6  -5  181.98   22.30
  -6  -6  -5  177.98   23.00
  -6  -6  -5  216.78   28.90
  -6  -6  -5  182.78   18.10
   6   6   5  152.88   19.80
   6   6   5  123.79   22.70
  -7  -6  -5  920.71   52.69
  -7  -6  -5  868.61   46.90
  -7  -6  -5  905.81   42.70
   7   6   5  911.81   44.80
   7   6   5  781.22   43.20
   1  -7  -5    0.50    7.10
  -1   7   5    1.50    9.50
  -1   7   5   -1.40    9.10
  -1   7   5    4.90    6.20
   0  -7  -5    4.80    7.80
   0  -7  -5   -6.00    7.20
   0  -7  -5    2.50    8.20
   0   7   5   -8.30    9.80
   0   7   5    4.60   14.90
   0   7   5   18.70    9.90
   0   7   5    2.00    6.90
  -1  -7  -5   11.30   10.50
  -1  -7  -5   27.70    8.90
   1   7   5   45.00   12.60
   1   7   5   29.50   15.00
   1   7   5   38.40    9.30
  -2  -7  -5  165.58   25.50
  -2  -7  -5  220.28   21.00
   2   7   5  210.58   22.10
   2   7   5  180.98   17.20
   2   7   5  182.88   19.80
   2   7   5  213.28   32.00
   2   7   5  179.48   26.20
  -3  -7  -5   14.00    9.70
  -3  -7  -5   12.30   24.40
   3   7   5   13.10   15.00
   3   7   5   31.90   10.90
   3   7   5    4.40   22.20
   3   7   5   18.90   12.50
   3   7   5   28.10   18.20
   3   7   5   14.60    9.10
  -4  -7  -5  164.98   21.20
  -4  -7  -5  177.58   21.30
   4   7   5  141.59   21.60
   4   7   5  174.98   20.00
   4   7   5  176.08   28.20
   4   7   5  123.19   20.40
  -5  -7  -5  218.38   28.20
  -5  -7  -5  208.98   23.60
  -5  -7  -5  237.58   20.80
  -5  -7  -5  227.78   26.60
   5   7   5  238.38   25.80
   5   7   5  216.78   19.80
   5   7   5  209.28   32.00
  -6  -7  -5    2.00   12.60
  -6  -7  -5   17.00   10.80
  -6  -7  -5    7.40    7.50
   6   7   5   34.10   10.00
   6   7   5   22.00    9.50
   0  -8  -5  164.78   14.20
   0  -8  -5  172.48   15.40
   0   8   5  183.58   16.50
   0   8   5  178.88   15.00
  -1  -8  -5  168.68   17.30
  -1  -8  -5  168.68   14.50
  -1  -8  -5  180.18   14.40
   1   8   5  184.88   17.20
   1   8   5  177.48   15.80
   1   8   5  157.68   19.80
  -2  -8  -5   78.79   13.00
  -2  -8  -5   81.89   12.40
   2   8   5   93.99   20.50
   2   8   5  111.19   16.00
   2   8   5  112.99   20.10
  -3  -8  -5   -1.70    5.80
  -3  -8  -5    3.30    7.20
   3   8   5   -9.20    8.40
   3   8   5  -16.40   18.00
   3   8   5   -9.60   14.70
   3   8   5   -2.50    7.90
  -4  -8  -5   33.40    8.80
  -4  -8  -5   16.00    8.00
   4   8   5    1.20   14.00
   4   8   5    7.90   18.50
  -5  -8  -5   18.90    8.10
  -5  -8  -5   40.50    9.50
   5   8   5   48.00    9.20
   5   8   5   26.50   12.50
  -6  -8  -5  117.69   15.30
   6   8   5   77.39   12.00
   6   8   5   95.99   13.90
  -3  -9  -5    1.90    5.40
  -3  -9  -5   -0.60    4.90
  -4  -9  -5  151.98   12.40
  -4  -9  -5  170.68   13.60
   4   9   5  143.29   13.80
   4   8  -6  230.88   17.90
   4   8  -6  213.68   15.90
   4   8  -6  159.98   20.20
  -4  -8   6  209.28   18.10
  -4  -8   6  197.78   16.80
   3   8  -6   73.29   12.30
   3   8  -6   86.99   11.80
   3   8  -6   95.69   15.00
  -3  -8   6   54.19   10.70
  -3  -8   6   65.49    8.90
   2   8  -6  192.38   16.00
   2   8  -6  154.28   19.60
   2   8  -6  198.68   17.70
  -2  -8   6  174.08   19.30
  -2  -8   6  163.68   14.20
   1   8  -6   -1.40    8.60
   1   8  -6   -5.70    6.80
  -1  -8   6   -9.20   10.20
  -1  -8   6    2.80   15.40
  -1  -8   6   -1.50    5.30
   5   7  -6   90.29   13.70
   5   7  -6   82.39   11.20
  -5  -7   6   78.19   12.50
  -5  -7   6   80.59   13.70
   4   7  -6  364.16   25.80
   4   7  -6  302.37   24.30
   4   7  -6  335.77   34.20
   4   7  -6  344.17   21.90
  -4  -7   6  276.07   23.50
  -4  -7   6  287.37   21.60
  -4  -7   6  322.87   24.30
   3   7  -6   52.69    9.50
   3   7  -6   62.59   13.40
   3   7  -6   84.69   15.00
   3   7  -6   59.99   19.20
  -3  -7   6   65.69   10.10
  -3  -7   6   57.49    9.40
  -3  -7   6   78.99   12.70
   2   7  -6  254.07   19.90
   2   7  -6  290.97   20.70
   2   7  -6  267.17   28.00
   2   7  -6  197.28   31.50
  -2  -7   6  240.08   19.30
  -2  -7   6  239.98   23.90
  -2  -7   6  234.28   30.80
   1   7  -6  187.98   17.80
   1   7  -6  182.78   17.80
   1   7  -6  178.68   26.10
  -1  -7   6  168.98   26.10
  -1  -7   6  161.68   16.30
  -1  -7   6  182.08   19.80
  -1  -7   6  162.68   21.60
   0   7  -6  141.79   16.00
   0  -7   6  145.09   14.70
   0  -7   6  158.78   23.20
   0  -7   6  138.79   17.40
   1  -7   6   26.70    8.80
   1  -7   6   23.70    7.20
   1  -7   6   32.60    8.00
   6   6  -6   89.09   15.70
   6   6  -6   94.29   12.90
  -6  -6   6  122.49   14.40
  -6  -6   6   95.39   12.80
   5   6  -6   13.10   16.20
   5   6  -6    8.40    8.80
   5   6  -6    6.30   15.50
   5   6  -6   19.50   22.80
   5   6  -6   13.30    9.10
  -5  -6   6    9.60    8.30
  -5  -6   6   -2.10    8.10
   4   6  -6   11.80    9.40
   4   6  -6    4.40    7.50
   4   6  -6   14.20   10.70
   4   6  -6    1.50   13.10
  -4  -6   6   13.60   10.50
  -4  -6   6    7.00    9.00
   3   6  -6  154.08   24.40
   3   6  -6  176.18   26.50
   3   6  -6  187.58   17.80
   3   6  -6  179.68   23.20
   3   6  -6  159.98   16.60
  -3  -6   6  183.78   27.70
  -3  -6   6  171.48   19.00
  -3  -6   6  158.98   19.10
  -3  -6   6  157.98   21.30
   2   6  -6   14.90   16.10
   2   6  -6    0.40    7.20
   2   6  -6    1.10   11.60
   2   6  -6    6.20    7.30
  -2  -6   6    3.70    9.10
  -2  -6   6   12.70    9.50
  -2  -6   6   -3.00   11.30
  -2  -6   6    6.70   16.00
  -2  -6   6   25.60   17.60
   1   6  -6  132.49   14.80
   1   6  -6  113.89   22.30
   1   6  -6  146.49   15.90
  -1  -6   6  104.89   23.10
  -1  -6   6   95.19   15.30
  -1  -6   6  115.99   17.10
  -1  -6   6  157.08   25.40
  -1  -6   6  131.19   15.70
   0   6  -6   42.40   11.00
   0   6  -6   39.10    9.10
   0   6  -6   25.40   15.60
   0  -6   6   29.30    9.90
   0  -6   6   39.80   10.90
   0  -6   6   16.20   13.70
   0  -6   6   25.70   12.30
   0  -6   6   38.40   18.20
  -1   6  -6   92.99   15.30
  -1   6  -6   50.89   14.80
  -1   6  -6   23.50   21.00
   1  -6   6   80.19   13.70
   1  -6   6   58.79   14.50
   1  -6   6   56.49   13.40
   1  -6   6  104.09   14.30
   1  -6   6   70.79   12.10
   2  -6   6   25.60    9.50
   2  -6   6   29.30    8.40
   2  -6   6   18.00   23.40
   2  -6   6   35.90    8.80
   2  -6   6   40.70   12.10
   6   5  -6  100.99   14.70
   6   5  -6  100.59   15.90
  -6  -5   6  118.19   16.40
  -6  -5   6  130.29   18.00
   5   5  -6  117.49   17.30
   5   5  -6  127.79   22.90
   5   5  -6   77.79   19.80
   5   5  -6  116.39   17.90
  -5  -5   6  111.69   19.10
  -5  -5   6   95.89   15.80
  -5  -5   6  110.49   19.80
  -5  -5   6  108.29   14.30
   4   5  -6  176.68   22.00
   4   5  -6  179.68   23.50
   4   5  -6  177.18   19.30
   4   5  -6  188.08   28.50
   4   5  -6  185.48   17.50
  -4  -5   6  191.18   25.00
  -4  -5   6  205.58   21.30
  -4  -5   6  234.68   22.40
  -4  -5   6  192.28   20.20
   3   5  -6  249.58   19.10
   3   5  -6  250.37   30.10
   3   5  -6  270.37   19.70
   3   5  -6  265.67   24.40
   3   5  -6  259.87   24.00
   3   5  -6  239.38   25.40
  -3  -5   6  231.18   22.80
  -3  -5   6  215.98   22.40
  -3  -5   6  209.98   24.50
  -3  -5   6  253.27   22.80
  -3  -5   6  238.88   20.90
  -3  -5   6  227.88   24.30
   2   5  -6  211.18   16.80
   2   5  -6  219.78   31.20
   2   5  -6  211.78   21.10
   2   5  -6  215.38   24.80
   2   5  -6  210.38   17.40
  -2  -5   6  207.28   21.00
  -2  -5   6  198.78   21.70
  -2  -5   6  204.18   26.00
  -2  -5   6  206.18   19.80
  -2  -5   6  189.98   22.80
   1   5  -6  372.46   22.20
   1   5  -6  356.06   30.80
   1   5  -6  329.97   23.50
   1   5  -6  320.67   26.90
  -1  -5   6  384.36   26.50
  -1  -5   6  424.76   30.40
  -1  -5   6  379.26   27.70
  -1  -5   6  381.46   29.10
  -1  -5   6  376.06   29.50
  -1  -5   6  373.36   25.60
   0   5  -6  112.69   18.90
   0   5  -6   47.00   15.00
   0   5  -6   57.39   13.00
   0  -5   6   63.59   14.30
   0  -5   6   69.19   17.70
   0  -5   6   76.09   13.60
   0  -5   6   92.49   15.50
   0  -5   6   97.69   13.10
   0  -5   6  107.49   17.00
  -1   5  -6  296.37   20.40
  -1   5  -6  325.07   29.30
   1  -5   6  339.87   24.00
   1  -5   6  277.37   31.30
   1  -5   6  307.87   25.10
   1  -5   6  313.47   28.30
   1  -5   6  303.77   28.90
   1  -5   6  278.17   28.90
   1  -5   6  298.57   25.70
  -2   5  -6  112.89   16.70
  -2   5  -6  105.69   22.10
   2  -5   6  125.49   18.00
   2  -5   6  136.59   18.40
   2  -5   6  166.68   21.00
   2  -5   6   96.69   13.50
   2  -5   6  165.28   20.60
   2  -5   6  137.19   23.30
   3  -5   6  127.09   15.90
   3  -5   6   95.49   16.20
   3  -5   6  121.69   16.40
   3  -5   6  118.99   15.40
   7   4  -6  155.88   14.80
  -7  -4   6  129.29   17.90
  -7  -4   6  169.08   12.90
  -7  -4   6  158.68   15.00
   6   4  -6  329.27   26.10
   6   4  -6  285.87   22.60
  -6  -4   6  263.27   20.80
  -6  -4   6  299.57   27.00
   5   4  -6  379.96   26.80
   5   4  -6  349.47   34.10
   5   4  -6  345.07   31.10
  -5  -4   6  325.97   25.90
  -5  -4   6  334.97   33.80
  -5  -4   6  341.27   27.10
  -5  -4   6  355.66   28.10
  -5  -4   6  377.46   29.90
   4   4  -6   16.20    8.80
   4   4  -6   32.20   22.00
   4   4  -6   24.70   10.70
   4   4  -6   43.10   17.10
   4   4  -6   44.70   10.90
   4   4  -6   47.80   12.70
   4   4  -6   25.80   13.30
  -4  -4   6   52.09   11.00
  -4  -4   6   24.40   12.10
  -4  -4   6   30.70   10.70
  -4  -4   6   35.40   12.40
  -4  -4   6   28.30   13.20
   3   4  -6  554.44   34.70
   3   4  -6  522.05   32.30
   3   4  -6  500.25   32.20
   3   4  -6  527.35   29.40
   3   4  -6  532.55   34.40
   3   4  -6  544.65   29.20
  -3  -4   6  505.45   32.00
  -3  -4   6  494.35   33.10
  -3  -4   6  533.35   30.50
  -3  -4   6  511.45   33.00
   2   4  -6  611.14   34.10
   2   4  -6  541.35   30.40
   2   4  -6  593.04   33.40
   2   4  -6  597.84   35.30
   2   4  -6  592.44   30.30
  -2  -4   6  552.44   32.90
  -2  -4   6  565.34   33.50
  -2  -4   6  563.64   31.40
   1   4  -6  246.88   20.00
   1   4  -6  261.67   17.10
   1   4  -6  282.77   20.70
   1   4  -6  288.97   22.70
  -1  -4   6  309.47   20.90
  -1  -4   6  296.57   20.70
   0   4  -6  193.68   18.00
   0   4  -6  161.58   12.80
   0  -4   6  177.08   16.30
   0  -4   6  168.78   22.30
   0  -4   6  184.78   17.20
   0  -4   6  177.58   19.10
  -1   4  -6   97.59   12.40
  -1   4  -6   97.09   17.20
  -1   4  -6  115.89   21.20
   1  -4   6  131.79   17.40
   1  -4   6  120.79   17.80
   1  -4   6  137.29   18.80
   1  -4   6  155.38   19.90
   1  -4   6  136.69   20.00
   1  -4   6  135.89   18.30
   1  -4   6  126.39   17.30
   1  -4   6  158.78   20.80
  -2   4  -6   73.59   19.10
   2  -4   6   61.19   15.20
   2  -4   6   86.29   15.00
   2  -4   6   47.20   12.60
   2  -4   6   55.19   15.70
   2  -4   6   56.69   18.00
   2  -4   6   67.09   14.70
   2  -4   6   71.59   14.40
   2  -4   6   58.49   12.90
   3  -4   6  786.42   46.30
   3  -4   6  829.32   45.60
   3  -4   6  813.12   47.00
   3  -4   6  824.42   46.90
   3  -4   6  815.92   45.70
   4  -4   6   21.10    9.00
   4  -4   6   29.80    9.10
   4  -4   6   18.20    8.80
   4  -4   6   16.10    7.90
   7   3  -6  227.08   16.20
  -7  -3   6  158.88   20.20
  -7  -3   6  213.58   14.60
   6   3  -6  107.09   18.80
   6   3  -6  116.19   19.60
  -6  -3   6   96.09   14.60
  -6  -3   6   96.29   17.10
   5   3  -6  995.50   52.49
   5   3  -6  970.90   56.09
   5   3  -6  973.80   56.79
  -5  -3   6  980.80   57.89
  -5  -3   6 1061.19   54.09
  -5  -3   6 1014.10   51.79
  -5  -3   6 1055.59   55.19
  -5  -3   6 1005.40   58.09
   4   3  -6   40.20   11.40
   4   3  -6   51.99   18.50
   4   3  -6   46.90   12.20
   4   3  -6   62.09   10.50
   4   3  -6   44.60   11.80
   4   3  -6   50.59   11.20
   4   3  -6   35.30   13.60
  -4  -3   6   61.49   16.10
  -4  -3   6   42.70    9.20
  -4  -3   6   52.19   11.80
   3   3  -6  187.18   17.20
   3   3  -6  177.98   15.40
   3   3  -6  174.88   17.10
   3   3  -6  190.78   16.70
   3   3  -6  195.88   15.10
  -3  -3   6  151.98   14.60
  -3  -3   6  139.99   15.80
   2   3  -6 2615.34  118.79
   2   3  -6 2536.25  115.79
   2   3  -6 2692.93  118.59
   2   3  -6 2495.65  117.59
   2   3  -6 2635.94  115.89
  -2  -3   6 2828.12  119.29
  -2  -3   6 2772.12  118.79
  -2  -3   6 2749.52  117.39
   1   3  -6  296.57   19.00
   1   3  -6  269.57   17.80
   1   3  -6  279.47   15.80
  -1  -3   6  255.77   18.10
  -1  -3   6  249.78   19.30
   0   3  -6 1792.12   81.99
   0   3  -6 1963.00   84.19
   0   3  -6 1770.82   78.49
   0   3  -6 1704.93   78.59
   0  -3   6 1876.21   82.99
   0  -3   6 1893.61   83.49
  -1   3  -6   12.70    7.30
  -1   3  -6   10.50    5.60
  -1   3  -6   11.10    6.30
  -1   3  -6   12.60    6.80
   1  -3   6   14.10    6.10
   1  -3   6   20.00    7.30
  -2   3  -6    6.90    9.70
  -2   3  -6   13.70    9.50
  -2   3  -6   28.70   12.20
   2  -3   6   12.90   12.70
   2  -3   6   10.80   11.70
   2  -3   6    6.70   13.40
   2  -3   6   18.00   14.00
   2  -3   6   14.30    8.60
   2  -3   6  -11.60   12.00
   2  -3   6   24.20   11.30
   2  -3   6   13.50   10.00
   2  -3   6   22.60   15.30
  -3   3  -6  606.74   41.40
  -3   3  -6  674.93   43.70
   3  -3   6  649.43   41.80
   3  -3   6  612.54   40.90
   3  -3   6  618.24   40.60
   3  -3   6  662.23   39.50
   3  -3   6  648.74   39.30
   3  -3   6  638.24   40.30
   3  -3   6  645.74   40.40
  -4   3  -6   10.20   10.00
   4  -3   6   -0.40    9.40
   4  -3   6    7.10   10.90
   4  -3   6    6.00   10.40
   4  -3   6   -6.60    9.30
   4  -3   6   18.90   10.20
   5  -3   6  120.19   14.50
   5  -3   6  102.99   16.10
   5  -3   6  109.99   13.80
   6   2  -6   43.30   10.60
  -6  -2   6   -5.20   11.20
  -6  -2   6    6.30   15.40
  -6  -2   6   22.20    8.80
  -6  -2   6   22.00   18.60
   5   2  -6  859.81   53.59
   5   2  -6  939.91   50.19
   5   2  -6  972.70   53.59
  -5  -2   6  953.70   50.99
  -5  -2   6  975.40   47.10
  -5  -2   6  939.51   52.19
  -5  -2   6  969.40   49.40
  -5  -2   6  914.91   56.99
  -5  -2   6  932.11   57.39
  -5  -2   6  985.10   49.70
   4   2  -6  732.63   47.60
   4   2  -6  722.43   40.50
   4   2  -6  781.72   43.00
   4   2  -6  714.53   44.00
   4   2  -6  764.82   42.90
   4   2  -6  778.62   44.00
  -4  -2   6  882.51   44.10
  -4  -2   6  835.62   41.90
  -4  -2   6  764.82   41.20
  -4  -2   6  795.02   40.80
  -4  -2   6  764.32   39.10
  -4  -2   6  805.52   49.00
  -4  -2   6  834.42   42.70
  -4  -2   6  797.82   40.90
   3   2  -6  123.59   13.50
   3   2  -6  120.29   13.70
   3   2  -6  120.89   12.50
   3   2  -6   93.39   13.20
   3   2  -6  108.29   12.90
  -3  -2   6   98.79   11.20
  -3  -2   6   87.59   12.80
  -3  -2   6   78.79   13.10
  -3  -2   6  100.69   14.20
   2   2  -6 2457.85  112.49
   2   2  -6 2501.55  112.49
   2   2  -6 2495.75  110.69
   2   2  -6 2431.86  111.99
   2   2  -6 2364.66  110.99
  -2  -2   6 2617.04  108.19
  -2  -2   6 2737.63  113.09
  -2  -2   6 2654.83  113.09
  -2  -2   6 2712.13  111.99
   1   2  -6  349.57   19.70
   1   2  -6  313.97   18.70
   1   2  -6  334.17   17.70
   1   2  -6  354.26   19.90
  -1  -2   6  351.86   19.80
  -1  -2   6  316.07   22.00
   0   2  -6  656.43   33.90
   0  -2   6  689.73   34.30
   0  -2   6  683.33   33.50
   0  -2   6  715.43   31.50
  -1   2  -6  265.47   16.10
  -1   2  -6  221.38   13.50
   1  -2   6  250.77   15.80
   1  -2   6  243.48   16.60
  -2   2  -6  117.89   12.10
  -2   2  -6  118.89   13.50
  -2   2  -6  115.89   12.80
   2  -2   6  115.09   12.30
   2  -2   6  118.39   12.80
  -3   2  -6  616.04   38.20
   3  -2   6  694.33   41.70
   3  -2   6  744.23   41.80
   3  -2   6  688.63   40.20
   3  -2   6  693.33   40.80
   3  -2   6  675.13   38.40
   3  -2   6  694.23   40.80
   3  -2   6  630.04   41.40
  -4   2  -6   36.50   15.90
  -4   2  -6   71.89   10.40
   4  -2   6   53.19   13.80
   4  -2   6   58.69   15.00
   4  -2   6   41.20   17.30
   4  -2   6   44.80   13.40
   4  -2   6   35.50   12.40
   4  -2   6   49.99   11.90
   4  -2   6   35.60   12.10
  -5   2  -6  209.98   18.80
  -5   2  -6  246.38   22.50
   5  -2   6  246.98   22.50
   5  -2   6  233.08   21.70
   5  -2   6  235.68   20.90
   5  -2   6  242.28   21.00
   6  -2   6  148.89   15.40
   6  -2   6  132.89   13.50
   6  -2   6  144.99   13.10
   6   1  -6    8.70    7.60
  -6  -1   6   16.00    8.40
  -6  -1   6    8.90   12.40
  -6  -1   6   14.40   16.20
  -6  -1   6   11.20    7.50
   5   1  -6  114.59   20.90
   5   1  -6   68.69   15.90
   5   1  -6  108.79   20.60
  -5  -1   6  105.39   24.40
  -5  -1   6   88.89   14.60
  -5  -1   6  107.69   14.70
  -5  -1   6   80.49   18.70
  -5  -1   6  106.39   14.40
  -5  -1   6   99.69   14.40
   4   1  -6 1145.29   59.79
   4   1  -6 1144.89   57.19
   4   1  -6 1172.98   57.19
  -4  -1   6 1158.78   54.39
  -4  -1   6 1102.99   55.99
  -4  -1   6 1088.09   54.79
  -4  -1   6 1184.98   55.89
  -4  -1   6 1107.79   57.19
  -4  -1   6  987.00   64.79
  -4  -1   6 1107.79   55.69
  -4  -1   6 1099.49   52.99
   3   1  -6  687.83   35.30
   3   1  -6  583.84   33.60
   3   1  -6  595.94   33.20
   3   1  -6  661.63   36.10
   3   1  -6  665.83   35.20
  -3  -1   6  706.73   34.30
  -3  -1   6  675.43   33.50
  -3  -1   6  670.53   32.90
  -3  -1   6  644.14   33.30
  -3  -1   6  655.53   35.60
  -3  -1   6  682.33   33.90
   2   1  -6  365.36   21.40
   2   1  -6  349.17   21.40
   2   1  -6  353.06   20.40
   2   1  -6  364.36   21.40
  -2  -1   6  380.26   22.30
  -2  -1   6  390.56   19.50
  -2  -1   6  369.06   20.90
  -2  -1   6  395.26   21.00
   1   1  -6 5371.16  233.68
   1   1  -6 5569.64  235.68
   1   1  -6 5521.25  235.48
   1   1  -6 5111.99  233.88
  -1  -1   6 5383.76  230.98
  -1  -1   6 5700.83  232.68
  -1  -1   6 6161.28  235.78
   0   1  -6  883.41   41.40
   0   1  -6  912.01   41.70
   0  -1   6  878.61   41.10
   0  -1   6  906.31   41.90
  -1   1  -6  400.36   20.50
  -1   1  -6  386.66   20.10
   1  -1   6  386.36   21.50
   1  -1   6  400.86   20.30
  -2   1  -6 1183.38   55.39
  -2   1  -6 1257.77   55.79
  -2   1  -6 1289.97   58.19
   2  -1   6 1276.37   57.39
   2  -1   6 1268.57   58.99
  -3   1  -6  283.37   21.30
  -3   1  -6  260.77   19.80
  -3   1  -6  270.57   16.80
   3  -1   6  331.77   20.70
  -4   1  -6  665.53   34.00
   4  -1   6  708.53   41.40
   4  -1   6  697.13   40.40
   4  -1   6  674.23   40.50
   4  -1   6  634.24   43.60
   4  -1   6  622.64   39.40
   4  -1   6  646.54   39.60
   4  -1   6  672.63   40.90
  -5   1  -6  582.44   32.30
  -5   1  -6  598.74   34.30
   5  -1   6  602.84   36.50
   5  -1   6  612.04   38.40
   5  -1   6  585.24   37.70
   5  -1   6  595.04   37.80
  -6   1  -6  161.68   16.40
  -6   1  -6  121.29   16.30
   6  -1   6  175.08   17.00
   6  -1   6  162.28   16.30
   6  -1   6  175.18   19.30
   6   0  -6  178.38   16.40
   6   0  -6  144.59   14.70
  -6   0   6  166.68   15.40
  -6   0   6  162.88   15.00
  -6   0   6  144.79   19.40
   5   0  -6   96.29   14.60
  -5   0   6  120.79   17.80
  -5   0   6   78.49   13.00
  -5   0   6  102.09   14.30
  -5   0   6  118.79   17.20
   4   0  -6  476.05   32.50
   4   0  -6  465.35   33.90
   4   0  -6  526.05   35.00
  -4   0   6  468.55   30.90
  -4   0   6  455.75   27.60
  -4   0   6  448.76   30.50
  -4   0   6  451.65   28.90
  -4   0   6  435.86   54.69
  -4   0   6  443.06   26.60
   3   0  -6  650.43   36.00
   3   0  -6  668.03   36.40
  -3   0   6  641.64   33.30
  -3   0   6  681.33   35.10
  -3   0   6  662.63   33.80
  -3   0   6  679.63   35.10
   2   0  -6   54.69    8.20
   2   0  -6   62.49    8.70
  -2   0   6   37.50    7.10
  -2   0   6   37.00    7.30
  -2   0   6   42.40    7.20
  -2   0   6   43.20    7.60
   1   0  -6 1375.16   61.69
   1   0  -6 1366.46   61.79
   1   0  -6 1338.37   60.39
  -1   0   6 1397.46   60.39
  -1   0   6 1394.56   60.69
  -1   0   6 1325.67   58.89
   0   0  -6 1882.31   83.29
   0   0  -6 1932.31   83.19
   0   0   6 1931.41   82.89
   0   0   6 1845.72   79.99
   0   0   6 1927.81   81.99
  -1   0  -6 1311.47   60.59
  -1   0  -6 1292.77   60.09
   1   0   6 1384.36   59.09
   1   0   6 1386.36   61.59
   1   0   6 1459.25   60.69
   1   0   6 1397.06   60.09
  -2   0  -6 1043.30   46.40
  -2   0  -6 1040.20   45.80
  -2   0  -6 1144.69   49.60
   2   0   6 1021.40   47.00
   2   0   6 1036.90   46.20
   2   0   6 1014.90   49.60
  -3   0  -6  217.08   14.30
  -3   0  -6  253.57   17.90
  -3   0  -6  266.87   17.20
   3   0   6  212.98   15.50
  -4   0  -6 1483.95   72.99
  -4   0  -6 1608.64   78.19
  -4   0  -6 1559.54   76.69
  -4   0  -6 1629.74   75.19
  -4   0  -6 1665.33   72.59
   4   0   6 1625.04   78.89
   4   0   6 1578.44   75.19
   4   0   6 1655.83   77.89
   4   0   6 1674.33   78.39
  -5   0  -6  783.52   52.79
  -5   0  -6 1010.80   47.50
  -5   0  -6  920.11   47.20
   5   0   6  958.20   51.99
   5   0   6  967.70   51.19
   5   0   6  917.41   54.39
   5   0   6  931.31   51.49
   5   0   6 1031.60   52.89
  -6   0  -6  278.97   20.70
  -6   0  -6  277.87   21.00
   6   0   6  298.57   24.00
   6   0   6  278.37   23.70
   6   0   6  284.77   22.10
   6  -1  -6   35.10    6.30
   6  -1  -6   45.80    8.70
  -6   1   6   25.00    7.60
  -6   1   6   31.20    7.80
   5  -1  -6  205.18   20.80
   5  -1  -6  190.88   19.50
  -5   1   6  210.08   21.90
  -5   1   6  193.68   19.60
  -5   1   6  209.68   17.40
  -5   1   6  220.58   20.00
   4  -1  -6  112.29   20.30
   4  -1  -6  126.89   22.70
  -4   1   6   85.79   16.70
  -4   1   6  103.59   15.90
  -4   1   6   95.89   13.40
  -4   1   6   79.79   15.30
  -4   1   6   93.19   14.10
  -4   1   6   66.19   12.70
   3  -1  -6 1804.82   84.29
   3  -1  -6 1826.92   84.59
   3  -1  -6 1855.91   86.79
   3  -1  -6 1839.72   85.19
  -3   1   6 1802.32   81.79
  -3   1   6 1762.62   84.19
  -3   1   6 1767.62   84.09
  -3   1   6 1787.32   81.19
  -3   1   6 1824.82   83.59
   2  -1  -6   24.20    6.30
   2  -1  -6   27.60    7.10
   2  -1  -6   19.20    6.60
  -2   1   6   20.80    6.00
  -2   1   6   34.40    6.20
  -2   1   6   29.90    6.30
  -2   1   6   36.10    7.10
  -2   1   6   39.30    7.80
   1  -1  -6  679.53   33.70
   1  -1  -6  699.53   34.00
   1  -1  -6  641.54   32.60
   1  -1  -6  692.13   32.30
  -1   1   6  678.73   31.90
  -1   1   6  664.33   31.10
  -1   1   6  695.13   32.40
  -1   1   6  673.43   32.90
  -1   1   6  692.13   33.30
   0  -1  -6  289.27   15.80
   0  -1  -6  277.57   15.40
   0  -1  -6  306.67   16.30
   0  -1  -6  258.47   13.20
   0   1   6  267.27   16.80
   0   1   6  262.07   13.80
   0   1   6  275.47   14.50
   0   1   6  242.08   14.70
   0   1   6  262.47   15.90
  -1  -1  -6  249.78   15.50
  -1  -1  -6  243.38   15.40
  -1  -1  -6  273.67   15.40
  -1  -1  -6  261.47   15.00
   1   1   6  307.87   16.00
   1   1   6  288.47   14.40
   1   1   6  303.57   15.80
   1   1   6  299.27   16.50
   1   1   6  272.47   17.30
  -2  -1  -6 6448.55  268.07
  -2  -1  -6 6320.57  265.47
  -2  -1  -6 6351.66  265.57
  -2  -1  -6 5838.62  264.57
   2   1   6 6534.05  268.27
   2   1   6 6360.86  266.37
   2   1   6 6471.15  267.17
   2   1   6 6196.88  263.97
  -3  -1  -6  193.28   15.40
  -3  -1  -6  198.18   14.70
  -3  -1  -6  180.48   13.30
   3   1   6  214.98   13.80
   3   1   6  188.48   12.70
  -4  -1  -6  178.38   19.90
  -4  -1  -6  175.08   16.80
  -4  -1  -6  192.58   19.10
  -4  -1  -6  216.88   15.10
  -4  -1  -6  184.18   16.80
   4   1   6  223.58   24.20
   4   1   6  232.38   25.50
   4   1   6  208.58   17.30
   4   1   6  221.78   21.80
  -5  -1  -6  808.42   55.19
  -5  -1  -6  964.00   51.99
  -5  -1  -6  965.70   47.30
  -5  -1  -6  895.91   58.39
  -5  -1  -6  936.31   47.00
  -5  -1  -6  985.30   50.29
   5   1   6  903.71   47.30
   5   1   6  976.60   53.09
   5   1   6 1007.80   51.99
   5   1   6  983.00   51.79
  -6  -1  -6   49.00   15.50
  -6  -1  -6   60.49   19.70
  -6  -1  -6   87.59   13.60
  -6  -1  -6   82.19   13.40
   6   1   6  113.89   16.20
   6   1   6   72.19   13.60
   6   1   6   88.89   15.20
  -7  -1  -6  136.39   15.80
  -7  -1  -6  129.89   13.60
   7   1   6  124.19   16.20
   7   1   6  118.19   14.40
   5  -2  -6  317.27   19.80
   5  -2  -6  293.17   22.60
  -5   2   6  266.07   21.30
  -5   2   6  259.47   22.20
  -5   2   6  304.67   19.60
  -5   2   6  264.27   23.80
   4  -2  -6  183.18   20.50
   4  -2  -6  184.78   22.00
   4  -2  -6  140.09   31.00
  -4   2   6  141.59   15.40
  -4   2   6  127.59   18.50
  -4   2   6  143.19   15.90
  -4   2   6  121.69   19.50
  -4   2   6  110.19   29.30
   3  -2  -6 1145.89   58.59
   3  -2  -6 1059.89   58.59
   3  -2  -6 1003.90   57.19
   3  -2  -6 1044.10   57.59
   3  -2  -6 1067.79   58.19
  -3   2   6 1149.98   57.09
  -3   2   6 1190.38   56.89
  -3   2   6 1172.08   53.79
  -3   2   6 1114.49   56.99
  -3   2   6 1112.29   53.89
  -3   2   6 1151.48   58.39
   2  -2  -6   54.29   10.30
   2  -2  -6   60.19   10.20
   2  -2  -6   51.89    9.50
  -2   2   6   35.70    8.20
  -2   2   6   44.40    8.00
  -2   2   6   46.50    7.80
  -2   2   6   38.70    8.10
  -2   2   6   39.10    7.90
   1  -2  -6  809.02   40.50
   1  -2  -6  827.32   40.40
   1  -2  -6  823.72   38.60
  -1   2   6  802.72   38.90
  -1   2   6  748.93   38.10
  -1   2   6  816.42   39.50
  -1   2   6  814.12   39.70
  -1   2   6  777.62   44.40
  -1   2   6  801.02   38.30
   0  -2  -6   50.79    7.50
   0  -2  -6   43.90    6.00
   0  -2  -6   55.89    9.60
   0  -2  -6   47.50    5.90
   0  -2  -6   47.90    7.30
   0   2   6   58.59    9.00
   0   2   6   47.90    6.30
   0   2   6   49.80    7.00
   0   2   6   61.09    8.70
   0   2   6   55.09   11.60
  -1  -2  -6 2270.77   97.29
  -1  -2  -6 2260.47   96.79
  -1  -2  -6 2126.19   96.39
  -1  -2  -6 2238.48   95.89
   1   2   6 2156.98   95.79
   1   2   6 2200.58   96.89
   1   2   6 2252.57   96.99
   1   2   6 2213.48   98.49
  -2  -2  -6 1241.98   55.19
  -2  -2  -6 1277.27   56.99
  -2  -2  -6 1320.77   55.69
  -2  -2  -6 1218.68   54.69
   2   2   6 1184.28   55.49
   2   2   6 1232.78   57.49
   2   2   6 1155.88   54.69
   2   2   6 1238.28   56.69
   2   2   6 1197.98   56.49
  -3  -2  -6 1564.74   70.79
  -3  -2  -6 1531.15   69.09
  -3  -2  -6 1576.84   72.29
  -3  -2  -6 1482.25   69.19
   3   2   6 1607.64   71.79
   3   2   6 1559.74   70.49
   3   2   6 1574.74   69.79
   3   2   6 1477.25   66.59
  -4  -2  -6  108.09   15.50
  -4  -2  -6   86.29   12.20
  -4  -2  -6   78.19   12.50
  -4  -2  -6  104.29   11.40
  -4  -2  -6  113.49   15.00
   4   2   6   89.39   14.70
   4   2   6   97.09   13.20
  -5  -2  -6  526.95   30.50
  -5  -2  -6  451.45   38.10
  -5  -2  -6  540.05   30.40
  -5  -2  -6  546.55   34.80
  -5  -2  -6  523.25   32.70
  -5  -2  -6  564.44   37.80
   5   2   6  601.74   35.70
   5   2   6  517.95   36.10
   5   2   6  548.95   35.00
   5   2   6  534.45   33.10
  -6  -2  -6  367.66   30.60
  -6  -2  -6  283.87   29.30
  -6  -2  -6  369.66   24.00
  -6  -2  -6  346.97   28.20
  -6  -2  -6  378.16   23.00
   6   2   6  296.67   25.20
   6   2   6  323.07   27.50
   6   2   6  297.07   23.50
   6   2   6  309.97   26.50
  -7  -2  -6  333.07   22.90
  -7  -2  -6  298.17   22.70
  -7  -2  -6  332.27   20.70
   7   2   6  306.27   22.50
   7   2   6  332.77   24.40
   5  -3  -6  168.48   14.50
  -5   3   6  182.78   13.90
  -5   3   6  159.48   15.10
   4  -3  -6  575.94   35.20
   4  -3  -6  546.35   35.30
   4  -3  -6  563.94   32.40
  -4   3   6  572.54   33.20
  -4   3   6  590.84   31.60
  -4   3   6  592.24   35.00
  -4   3   6  573.34   35.90
   3  -3  -6  576.74   39.90
   3  -3  -6  614.34   37.70
   3  -3  -6  610.94   38.90
   3  -3  -6  530.95   41.70
   3  -3  -6  601.34   42.00
  -3   3   6  634.84   41.80
  -3   3   6  649.04   34.30
  -3   3   6  667.73   42.00
  -3   3   6  646.44   35.00
  -3   3   6  651.83   38.30
  -3   3   6  641.44   37.50
   2  -3  -6  355.66   31.00
   2  -3  -6  317.87   25.90
   2  -3  -6  312.07   32.30
   2  -3  -6  341.57   26.90
   2  -3  -6  341.17   28.00
  -2   3   6  368.96   22.70
  -2   3   6  367.06   22.30
  -2   3   6  357.16   25.60
  -2   3   6  366.86   26.70
  -2   3   6  347.67   24.50
  -2   3   6  376.06   28.30
   1  -3  -6  626.94   34.30
   1  -3  -6  649.83   36.00
   1  -3  -6  619.94   36.20
  -1   3   6  695.63   35.30
  -1   3   6  640.74   34.80
  -1   3   6  688.33   36.00
  -1   3   6  663.83   33.40
  -1   3   6  623.24   33.00
   0  -3  -6  171.58   11.10
   0  -3  -6  177.68   14.20
   0  -3  -6  154.38   12.60
   0  -3  -6  161.98   14.30
   0   3   6  156.58   13.70
   0   3   6  174.68   13.10
   0   3   6  179.18   13.90
   0   3   6  158.38   21.70
   0   3   6  172.88   14.20
   0   3   6  168.88   12.90
  -1  -3  -6 2024.90   84.79
  -1  -3  -6 2015.20   86.29
  -1  -3  -6 1929.01   84.39
  -1  -3  -6 2127.49   87.29
   1   3   6 1831.72   88.49
   1   3   6 1825.32   84.19
   1   3   6 1782.42   84.89
   1   3   6 1893.31   85.89
   1   3   6 1841.62   85.49
  -2  -3  -6   94.49    9.90
  -2  -3  -6   94.59   10.00
  -2  -3  -6   76.39    9.60
  -2  -3  -6   84.39   10.60
  -2  -3  -6   72.69    9.60
   2   3   6   76.29    9.00
   2   3   6   79.99    9.50
   2   3   6   85.39   11.20
   2   3   6   79.69   10.30
   2   3   6   69.49   12.80
  -3  -3  -6   70.59    9.60
  -3  -3  -6   79.39    9.90
  -3  -3  -6   76.69   11.40
  -3  -3  -6   70.89   10.80
   3   3   6   44.10    9.30
   3   3   6   60.99    9.70
   3   3   6   57.79    9.70
  -4  -3  -6  220.98   20.70
  -4  -3  -6  230.58   17.20
  -4  -3  -6  224.38   16.80
  -4  -3  -6  230.88   18.20
  -4  -3  -6  235.88   20.20
   4   3   6  220.38   19.90
   4   3   6  248.68   20.80
   4   3   6  219.38   23.90
   4   3   6  218.08   19.00
  -5  -3  -6  666.53   41.70
  -5  -3  -6  702.93   41.90
  -5  -3  -6  745.43   40.30
  -5  -3  -6  716.33   37.70
  -5  -3  -6  647.14   44.40
   5   3   6  706.93   42.30
   5   3   6  701.53   41.30
   5   3   6  776.12   44.30
   5   3   6  696.53   42.70
   5   3   6  698.53   41.30
  -6  -3  -6  294.37   21.20
  -6  -3  -6  284.37   25.80
  -6  -3  -6  283.17   20.10
  -6  -3  -6  239.68   24.80
  -6  -3  -6  286.47   25.90
   6   3   6  222.48   25.10
   6   3   6  240.48   23.50
   6   3   6  268.27   25.50
   6   3   6  259.57   22.90
  -7  -3  -6  147.69   17.20
  -7  -3  -6  153.38   17.00
  -7  -3  -6  141.09   14.20
  -7  -3  -6  125.59   18.70
   7   3   6  112.79   17.20
   7   3   6  123.99   13.20
   7   3   6  136.09   17.00
   4  -4  -6   42.00    9.70
   4  -4  -6   49.50   10.70
  -4   4   6   47.90   13.60
  -4   4   6   44.20   10.10
  -4   4   6   36.10    7.70
  -4   4   6   54.79   10.60
   3  -4  -6   15.00    9.00
   3  -4  -6   11.80   12.40
   3  -4  -6   15.90   11.00
   3  -4  -6   19.30    8.70
  -3   4   6   15.80   11.00
  -3   4   6   10.10    6.70
  -3   4   6    3.60    8.40
  -3   4   6   12.60   11.30
   2  -4  -6  281.77   31.20
   2  -4  -6  277.27   24.60
   2  -4  -6  237.28   28.40
   2  -4  -6  263.57   25.00
   2  -4  -6  230.38   28.60
  -2   4   6  272.97   19.90
  -2   4   6  262.57   25.80
  -2   4   6  301.97   26.70
  -2   4   6  281.67   27.70
  -2   4   6  298.27   21.30
  -2   4   6  287.47   24.30
   1  -4  -6   74.89   20.30
   1  -4  -6   69.19   16.50
   1  -4  -6   77.89   14.50
   1  -4  -6  105.29   15.60
   1  -4  -6   66.89   12.50
  -1   4   6  105.39   15.50
  -1   4   6   92.09   15.60
  -1   4   6   95.29   12.40
  -1   4   6  102.69   14.80
  -1   4   6   82.39   12.10
  -1   4   6   93.09   15.70
   0  -4  -6   64.09   10.90
   0  -4  -6   61.09   10.20
   0   4   6   46.50    8.30
   0   4   6   49.60    9.40
   0   4   6   44.10   10.00
   0   4   6   41.50    8.90
   0   4   6   41.40    8.50
  -1  -4  -6  715.23   36.30
  -1  -4  -6  730.83   36.50
  -1  -4  -6  766.72   40.20
   1   4   6  752.92   37.70
   1   4   6  747.03   38.90
   1   4   6  783.52   39.70
   1   4   6  798.42   39.40
   1   4   6  786.32   48.10
   1   4   6  754.82   37.30
  -2  -4  -6  154.48   16.10
  -2  -4  -6  151.18   14.10
  -2  -4  -6  167.28   15.50
  -2  -4  -6  166.18   14.70
  -2  -4  -6  172.98   16.80
   2   4   6  205.08   15.50
   2   4   6  193.78   15.10
   2   4   6  200.88   16.30
   2   4   6  194.78   15.40
   2   4   6  186.58   16.10
   2   4   6  147.99   22.30
  -3  -4  -6  125.49   13.10
  -3  -4  -6  100.99   14.20
  -3  -4  -6  109.89   13.60
  -3  -4  -6  121.99   13.50
  -3  -4  -6  127.59   15.20
   3   4   6  116.29   13.70
   3   4   6  111.29   14.80
   3   4   6  112.39   15.00
   3   4   6  101.99   17.10
   3   4   6  121.09   14.60
  -4  -4  -6  206.88   18.30
  -4  -4  -6  205.38   17.00
  -4  -4  -6  213.78   17.40
  -4  -4  -6  200.38   21.70
  -4  -4  -6  180.58   19.70
  -4  -4  -6  219.68   22.00
   4   4   6  193.28   18.90
   4   4   6  210.28   24.20
   4   4   6  213.68   20.90
   4   4   6  202.38   23.80
  -5  -4  -6  548.25   31.60
  -5  -4  -6  569.14   35.50
  -5  -4  -6  538.35   30.80
  -5  -4  -6  586.84   34.20
  -5  -4  -6  596.94   35.50
   5   4   6  519.45   40.80
   5   4   6  507.35   37.20
   5   4   6  513.55   36.70
   5   4   6  548.95   36.10
  -6  -4  -6  304.27   21.90
  -6  -4  -6  318.87   26.80
  -6  -4  -6  292.07   22.80
  -6  -4  -6  302.07   27.10
  -6  -4  -6  312.47   25.80
   6   4   6  342.77   29.40
   6   4   6  362.36   28.10
   6   4   6  355.96   26.10
  -7  -4  -6  318.27   21.80
  -7  -4  -6  288.47   23.40
  -7  -4  -6  310.47   19.50
  -7  -4  -6  295.27   26.00
   7   4   6  264.77   21.90
   7   4   6  263.27   20.40
   3  -5  -6    1.90   10.40
   3  -5  -6   -4.90    7.00
  -3   5   6    3.20    6.40
  -3   5   6   -4.50   13.70
  -3   5   6   -7.50    8.90
  -3   5   6   -5.90    8.80
   2  -5  -6  135.29   16.60
   2  -5  -6  117.79   17.60
   2  -5  -6  138.09   22.70
  -2   5   6  132.59   15.90
  -2   5   6  135.49   14.60
  -2   5   6  131.99   20.90
  -2   5   6  122.39   21.20
   1  -5  -6   14.50   17.10
   1  -5  -6   29.60   10.40
   1  -5  -6   31.90   12.50
   1  -5  -6   49.40   19.90
  -1   5   6   28.00   12.10
  -1   5   6   41.10   13.50
  -1   5   6   30.80    8.60
  -1   5   6   39.30   13.40
  -1   5   6   28.40    7.80
  -1   5   6   24.50   15.10
   0  -5  -6  194.38   22.00
   0  -5  -6  144.69   24.00
   0   5   6  195.28   20.40
   0   5   6  172.68   16.10
   0   5   6  167.28   16.60
   0   5   6  159.78   19.70
   0   5   6  161.78   22.50
   0   5   6  159.58   20.20
  -1  -5  -6  126.99   21.60
  -1  -5  -6   97.89   17.00
   1   5   6  129.29   17.30
   1   5   6  119.69   14.10
   1   5   6  147.69   17.40
   1   5   6   99.79   14.80
   1   5   6  137.19   14.30
   1   5   6  115.69   16.10
  -2  -5  -6 1395.86   67.09
  -2  -5  -6 1378.76   69.39
   2   5   6 1428.76   67.39
   2   5   6 1435.96   67.89
   2   5   6 1345.47   65.69
   2   5   6 1337.47   67.29
   2   5   6 1334.77   63.99
   2   5   6 1372.96   67.09
  -3  -5  -6  113.69   14.20
  -3  -5  -6  106.29   14.90
  -3  -5  -6  102.49   16.20
  -3  -5  -6  113.29   17.00
  -3  -5  -6  128.39   19.10
  -3  -5  -6  118.09   19.00
   3   5   6  109.19   17.40
   3   5   6  102.49   15.70
   3   5   6  119.79   19.10
   3   5   6   69.59   20.20
   3   5   6  101.79   18.60
   3   5   6  103.49   16.30
   3   5   6  111.89   15.80
   3   5   6  115.69   17.10
  -4  -5  -6  138.79   22.20
  -4  -5  -6  189.28   25.70
  -4  -5  -6  190.78   17.60
  -4  -5  -6  162.58   20.40
  -4  -5  -6  186.08   19.80
  -4  -5  -6  167.08   21.20
  -4  -5  -6  164.08   17.80
   4   5   6  205.58   23.80
   4   5   6  224.38   23.00
   4   5   6  236.78   26.90
   4   5   6  220.28   21.80
  -5  -5  -6  519.45   46.30
  -5  -5  -6  591.34   36.40
  -5  -5  -6  553.14   34.40
  -5  -5  -6  611.34   35.10
  -5  -5  -6  591.64   31.30
  -5  -5  -6  549.05   33.70
   5   5   6  469.15   35.20
   5   5   6  487.75   36.60
   5   5   6  544.95   36.60
   5   5   6  554.04   39.20
   5   5   6  485.05   46.20
  -6  -5  -6  554.94   31.10
  -6  -5  -6  498.55   53.29
  -6  -5  -6  576.34   36.70
  -6  -5  -6  554.24   36.20
  -6  -5  -6  533.85   34.20
  -6  -5  -6  558.94   33.60
   6   5   6  587.94   35.20
   6   5   6  515.85   43.60
  -7  -5  -6   29.20    8.00
  -7  -5  -6   29.20    8.60
  -7  -5  -6   23.00   11.10
   7   5   6    9.00    8.30
   7   5   6   14.30    7.20
   2  -6  -6   15.70   12.80
   2  -6  -6    5.10    7.20
  -2   6   6   10.60    9.60
  -2   6   6    8.80    6.30
  -2   6   6   15.60    9.50
  -2   6   6   -9.50   24.80
   1  -6  -6   71.39   16.80
   1  -6  -6   92.59   14.50
   1  -6  -6   95.69   15.30
  -1   6   6   64.39   18.30
  -1   6   6   74.79   12.60
  -1   6   6   80.09   13.80
  -1   6   6   67.79   12.60
   0  -6  -6  196.88   22.00
   0  -6  -6  168.88   20.20
   0   6   6  193.48   31.80
   0   6   6  197.18   26.30
   0   6   6  190.88   17.50
   0   6   6  197.58   19.10
   0   6   6  190.18   27.20
   0   6   6  202.48   23.10
  -1  -6  -6  255.47   24.50
  -1  -6  -6  258.17   25.00
   1   6   6  288.07   26.20
   1   6   6  244.48   20.80
   1   6   6  233.98   24.20
   1   6   6  215.18   27.80
   1   6   6  237.48   19.00
   1   6   6  191.88   24.80
   1   6   6  239.38   26.00
  -2  -6  -6 1165.68   64.29
  -2  -6  -6 1364.86   65.49
  -2  -6  -6 1232.48   62.29
   2   6   6 1241.48   61.29
   2   6   6 1180.58   62.39
   2   6   6 1192.58   73.89
   2   6   6 1323.47   60.39
   2   6   6 1315.07   65.99
   2   6   6 1150.68   64.89
   2   6   6 1261.87   65.49
   2   6   6 1356.76   64.19
  -3  -6  -6   22.40   11.70
  -3  -6  -6   -3.80   11.70
  -3  -6  -6  -12.00   11.50
  -3  -6  -6   14.40   13.70
   3   6   6    0.70   11.80
   3   6   6   -7.30   12.00
   3   6   6   13.90   11.00
   3   6   6   17.30   16.60
   3   6   6   11.20   12.10
  -4  -6  -6  502.05   33.60
  -4  -6  -6  466.75   31.60
  -4  -6  -6  506.75   32.20
  -4  -6  -6  525.15   37.00
   4   6   6  490.65   38.40
   4   6   6  428.86   35.80
   4   6   6  462.85   35.10
   4   6   6  466.35   31.60
  -5  -6  -6   16.20   14.50
  -5  -6  -6   10.00   10.90
  -5  -6  -6   13.10    9.90
  -5  -6  -6    6.60   11.00
   5   6   6    5.30   10.60
   5   6   6    8.30   16.30
   5   6   6   -1.70   10.30
  -6  -6  -6  308.37   34.30
  -6  -6  -6  318.97   27.60
  -6  -6  -6  316.37   28.40
  -6  -6  -6  376.56   24.80
   6   6   6  368.26   26.40
   6   6   6  378.16   54.69
  -7  -6  -6   71.79   13.10
  -7  -6  -6   90.39   12.00
   7   6   6  112.89   14.10
   7   6   6   93.09   13.70
  -1   7   6   77.09   11.20
  -1   7   6   77.79   12.10
  -1   7   6   54.99    8.60
   0  -7  -6   37.90    9.20
   0  -7  -6   35.00    9.30
   0  -7  -6   35.30    8.80
   0   7   6   37.40    8.50
   0   7   6   37.80   10.90
   0   7   6   23.90   17.00
   0   7   6   25.60   10.30
  -1  -7  -6   82.99   13.50
  -1  -7  -6   54.69   10.80
   1   7   6   84.69   14.10
   1   7   6   53.59   16.80
   1   7   6   75.99   11.40
  -2  -7  -6    9.50    9.60
  -2  -7  -6   10.50   13.10
   2   7   6   13.20   10.40
   2   7   6   21.90   15.60
   2   7   6   25.80    8.70
   2   7   6   12.50   10.80
  -3  -7  -6   89.69   14.40
   3   7   6   61.59   15.80
   3   7   6   94.09   19.80
   3   7   6   93.79   16.20
   3   7   6   78.99   13.60
   3   7   6   87.29   22.20
  -4  -7  -6  402.26   28.30
  -4  -7  -6  450.15   30.90
   4   7   6  365.06   35.70
   4   7   6  401.06   28.60
   4   7   6  414.46   37.70
  -5  -7  -6  103.29   15.80
  -5  -7  -6  115.29   20.10
  -5  -7  -6  102.99   18.40
  -5  -7  -6  105.29   16.90
   5   7   6  136.49   17.00
   5   7   6  152.08   24.80
   5   7   6  168.48   22.30
  -6  -7  -6   36.90   13.80
  -6  -7  -6   55.19   13.30
  -6  -7  -6   30.20    8.30
   6   7   6   34.90   10.70
   6   7   6   44.00    9.80
   0  -8  -6  165.88   13.70
   0  -8  -6  124.19   13.80
   0   8   6  148.39   15.10
   0   8   6  163.38   13.30
  -1  -8  -6   43.10    7.60
  -1  -8  -6   45.20   10.00
  -1  -8  -6   42.60    7.40
   1   8   6   53.99   12.60
   1   8   6   34.10    8.20
   1   8   6   35.20    9.50
  -2  -8  -6   97.29   12.70
  -2  -8  -6   95.29   13.60
   2   8   6  122.09   15.90
   2   8   6   93.29   15.90
  -3  -8  -6  446.16   28.50
   3   8   6  465.35   28.30
   3   8   6  436.76   27.60
   3   8   6  451.85   39.10
  -4  -8  -6  259.17   20.70
   4   8   6  248.38   32.50
  -5  -8  -6   64.09   11.00
  -5  -8  -6   69.59    9.30
   5   8   6   79.69   12.40
   5   8   6   65.49   13.10
  -6  -8  -6   25.70    8.30
   6   8   6   17.50    8.90
   6   8   6   12.10    8.40
   4   8  -7   18.00    7.70
   4   8  -7   11.60    6.60
  -4  -8   7    7.60    6.50
   3   8  -7   61.19   11.00
   3   8  -7   86.99   12.20
   3   8  -7   77.19   11.70
  -3  -8   7   55.69    9.50
  -3  -8   7   57.49    8.10
   2   8  -7  116.19   13.00
   2   8  -7  101.29   15.00
  -2  -8   7  115.19   11.90
  -2  -8   7  106.39   15.40
   1   8  -7   81.19   12.00
  -1  -8   7   77.79    9.50
   5   7  -7   46.60    9.40
   5   7  -7   38.60    8.60
  -5  -7   7   33.20    7.60
  -5  -7   7   47.20    8.10
   4   7  -7  175.28   18.50
   4   7  -7  185.88   19.60
  -4  -7   7  125.39   18.70
  -4  -7   7  157.18   15.50
  -4  -7   7  174.68   18.00
   3   7  -7  510.95   29.30
   3   7  -7  534.45   33.40
   3   7  -7  429.16   41.90
   3   7  -7  484.25   30.60
  -3  -7   7  533.65   32.50
  -3  -7   7  507.25   27.50
  -3  -7   7  518.25   29.30
   2   7  -7   45.60    9.80
   2   7  -7   25.10   21.80
   2   7  -7   14.10   15.40
   2   7  -7   39.10    8.90
  -2  -7   7   23.90    9.90
  -2  -7   7   35.10    7.90
   1   7  -7  394.86   23.90
   1   7  -7  332.27   23.30
  -1  -7   7  346.07   38.00
  -1  -7   7  351.46   26.10
  -1  -7   7  333.57   25.60
  -1  -7   7  368.66   23.20
   0   7  -7  185.08   18.80
   0   7  -7  145.49   16.40
   0  -7   7  138.29   16.30
   0  -7   7  153.48   20.00
   0  -7   7  163.88   15.00
   0  -7   7  147.19   26.70
   1  -7   7    5.30    6.20
   1  -7   7    2.10    5.80
   1  -7   7    9.20   11.20
   6   6  -7   61.09    9.00
   6   6  -7   46.50   15.80
  -6  -6   7   74.99   11.50
  -6  -6   7   73.59   11.60
   5   6  -7   55.59   17.70
   5   6  -7   38.80    9.30
   5   6  -7   28.00    9.20
   5   6  -7   43.40   18.40
  -5  -6   7   31.50    8.50
  -5  -6   7   48.60   10.00
   4   6  -7   48.40   12.40
   4   6  -7   48.30   17.10
   4   6  -7   50.69    9.50
   4   6  -7   32.90   10.90
  -4  -6   7   64.19   11.40
  -4  -6   7   36.60   10.20
   3   6  -7  278.97   30.20
   3   6  -7  276.07   21.20
   3   6  -7  301.97   22.30
   3   6  -7  315.37   27.30
   3   6  -7  295.57   32.80
  -3  -6   7  320.57   26.60
  -3  -6   7  296.47   22.90
  -3  -6   7  257.67   32.90
  -3  -6   7  317.47   23.20
   2   6  -7   23.30   15.30
   2   6  -7   24.30   17.90
   2   6  -7   29.10    8.60
   2   6  -7   30.60   16.10
   2   6  -7   15.30    8.30
  -2  -6   7   18.60   16.10
  -2  -6   7   43.20   13.30
  -2  -6   7   60.89   20.60
  -2  -6   7   31.80    9.80
  -2  -6   7   35.00   10.00
   1   6  -7  323.87   35.20
   1   6  -7  366.66   22.80
   1   6  -7  326.97   23.30
   1   6  -7  346.27   32.00
  -1  -6   7  277.27   26.30
  -1  -6   7  246.88   36.90
  -1  -6   7  302.47   27.40
  -1  -6   7  330.77   35.20
  -1  -6   7  325.87   23.20
   0   6  -7  703.53   38.60
   0   6  -7  642.54   47.80
   0   6  -7  724.93   36.70
   0  -6   7  699.53   41.40
   0  -6   7  682.93   40.80
   0  -6   7  737.43   38.50
   0  -6   7  689.33   41.50
  -1   6  -7  129.79   17.00
   1  -6   7  115.19   17.50
   1  -6   7  134.69   15.90
   1  -6   7  111.19   16.90
   1  -6   7  142.59   17.40
   1  -6   7  134.79   17.20
   2  -6   7  120.59   19.00
   2  -6   7  101.99   13.50
   2  -6   7   89.09   13.10
   2  -6   7  102.29   14.40
   6   5  -7  121.99   14.90
   6   5  -7  137.99   21.60
  -6  -5   7  138.29   16.00
  -6  -5   7  146.09   16.20
   5   5  -7   97.39   13.00
   5   5  -7   98.59   18.60
   5   5  -7  133.49   17.10
   5   5  -7  124.49   21.30
  -5  -5   7  123.89   18.50
   4   5  -7  578.34   33.10
   4   5  -7  593.84   37.20
   4   5  -7  546.75   39.90
   4   5  -7  544.15   42.00
   4   5  -7  565.04   34.40
  -4  -5   7  581.94   40.90
  -4  -5   7  678.43   37.80
   3   5  -7  725.73   37.20
   3   5  -7  723.33   37.80
   3   5  -7  722.43   44.10
   3   5  -7  683.73   42.10
   3   5  -7  713.53   41.60
  -3  -5   7  635.34   38.90
  -3  -5   7  648.04   43.10
  -3  -5   7  655.03   41.50
   2   5  -7  378.36   34.00
   2   5  -7  394.26   29.80
   2   5  -7  401.86   24.80
   2   5  -7  416.86   30.80
   2   5  -7  414.46   25.40
   2   5  -7  347.07   34.70
  -2  -5   7  451.15   35.50
  -2  -5   7  377.16   26.90
  -2  -5   7  396.46   26.30
  -2  -5   7  439.06   30.80
  -2  -5   7  420.96   30.70
   1   5  -7  357.46   21.20
   1   5  -7  346.77   27.20
   1   5  -7  320.37   31.30
  -1  -5   7  322.37   28.10
  -1  -5   7  326.37   23.80
  -1  -5   7  290.07   29.90
  -1  -5   7  251.17   27.30
  -1  -5   7  306.07   26.90
   0   5  -7   10.10    6.80
   0   5  -7   16.40   13.50
   0   5  -7   17.30   13.00
   0   5  -7   -0.70   21.70
   0  -5   7   -3.60   15.60
   0  -5   7    1.60   10.60
   0  -5   7    7.80   11.90
   0  -5   7   -3.40   12.10
   0  -5   7   10.90    9.50
   0  -5   7    7.20   11.60
  -1   5  -7    9.40   19.60
  -1   5  -7   -2.40   16.90
   1  -5   7    9.40   11.40
   1  -5   7   32.30    9.30
   1  -5   7   21.00   11.90
   1  -5   7    8.80    9.90
   1  -5   7    9.90   13.00
   1  -5   7    3.20   16.50
   2  -5   7  535.65   34.50
   2  -5   7  545.05   33.70
   2  -5   7  518.65   30.40
   2  -5   7  488.95   32.70
   2  -5   7  473.35   34.00
   2  -5   7  547.95   34.20
   3  -5   7   22.60    8.60
   3  -5   7   48.00   10.00
   3  -5   7   15.20    7.20
   3  -5   7   30.10    9.20
   6   4  -7   67.79   10.80
   6   4  -7   54.09   12.50
  -6  -4   7   62.69   10.40
  -6  -4   7   39.80   11.50
   5   4  -7  265.57   21.50
   5   4  -7  217.48   25.90
   5   4  -7  214.18   29.90
  -5  -4   7  191.88   22.50
  -5  -4   7  222.28   25.10
  -5  -4   7  258.37   23.80
  -5  -4   7  215.68   21.30
   4   4  -7  223.18   27.00
   4   4  -7  245.08   19.20
   4   4  -7  224.68   39.50
   4   4  -7  253.77   23.80
   4   4  -7  240.98   24.50
   4   4  -7  238.58   21.20
  -4  -4   7  213.18   24.80
  -4  -4   7  233.88   21.20
  -4  -4   7  208.88   25.50
  -4  -4   7  203.08   22.10
  -4  -4   7  221.18   24.70
   3   4  -7  373.76   24.20
   3   4  -7  331.07   27.30
   3   4  -7  343.67   29.90
   3   4  -7  387.76   28.30
   3   4  -7  411.76   31.10
   3   4  -7  393.06   24.40
  -3  -4   7  399.96   28.90
  -3  -4   7  440.06   28.00
  -3  -4   7  415.06   26.20
  -3  -4   7  415.96   29.30
   2   4  -7 1008.20   52.69
   2   4  -7 1068.39   55.49
   2   4  -7 1075.59   49.90
   2   4  -7 1077.29   54.19
   2   4  -7 1007.80   49.80
  -2  -4   7 1022.10   55.29
  -2  -4   7 1035.50   55.79
  -2  -4   7 1012.10   52.09
  -2  -4   7 1032.60   53.79
   1   4  -7  197.38   21.10
   1   4  -7  231.58   19.40
   1   4  -7  222.48   15.40
  -1  -4   7  199.88   17.80
  -1  -4   7  271.47   25.40
  -1  -4   7  240.98   23.90
  -1  -4   7  229.38   20.20
  -1  -4   7  222.18   19.20
   0   4  -7  265.77   16.80
   0   4  -7  250.17   21.70
   0   4  -7  286.87   24.70
   0  -4   7  295.47   27.60
   0  -4   7  265.87   25.90
   0  -4   7  301.67   22.50
   0  -4   7  304.97   26.10
   0  -4   7  306.87   22.00
  -1   4  -7  271.47   21.80
  -1   4  -7  305.27   25.10
  -1   4  -7  324.17   30.30
   1  -4   7  290.27   29.20
   1  -4   7  252.37   26.70
   1  -4   7  198.88   31.80
   1  -4   7  274.87   25.50
   1  -4   7  272.27   23.50
   1  -4   7  278.97   22.90
   1  -4   7  343.07   35.40
   1  -4   7  285.27   24.60
   1  -4   7  283.77   25.20
   2  -4   7   77.19   13.60
   2  -4   7  114.49   18.50
   2  -4   7   81.39   18.30
   2  -4   7   63.29   19.20
   2  -4   7  114.59   17.70
   2  -4   7   66.69   14.40
   2  -4   7   98.29   16.10
   2  -4   7  104.09   18.70
   3  -4   7  298.37   25.40
   3  -4   7  325.37   25.90
   3  -4   7  313.37   25.80
   3  -4   7  322.37   25.70
   3  -4   7  299.97   27.40
   4  -4   7   30.80    8.90
   4  -4   7   13.00    7.60
   4  -4   7   22.70    8.80
   4  -4   7   33.80    9.20
   6   3  -7   37.00   11.00
   6   3  -7   35.00   11.30
  -6  -3   7   18.80    8.00
  -6  -3   7   22.70   12.50
   5   3  -7  382.16   31.80
   5   3  -7  362.16   28.00
   5   3  -7  374.56   33.40
  -5  -3   7  427.76   34.00
  -5  -3   7  447.06   28.00
  -5  -3   7  428.36   30.90
  -5  -3   7  366.46   38.00
  -5  -3   7  388.46   30.00
   4   3  -7  576.34   44.00
   4   3  -7  550.54   33.30
   4   3  -7  572.44   32.20
   4   3  -7  605.94   35.90
   4   3  -7  585.94   36.60
   4   3  -7  601.04   37.00
   4   3  -7  543.65   39.70
  -4  -3   7  565.24   34.00
  -4  -3   7  604.14   36.00
  -4  -3   7  546.65   38.80
  -4  -3   7  504.65   33.50
  -4  -3   7  561.84   37.00
   3   3  -7  692.83   39.30
   3   3  -7  686.13   40.30
   3   3  -7  679.33   36.60
   3   3  -7  688.63   39.30
   3   3  -7  716.23   37.00
   3   3  -7  694.93   40.80
  -3  -3   7  744.43   38.30
  -3  -3   7  772.42   40.60
  -3  -3   7  701.83   41.70
  -3  -3   7  728.03   39.60
   2   3  -7  475.05   26.10
   2   3  -7  525.65   28.70
   2   3  -7  473.75   25.50
   2   3  -7  438.06   27.40
   2   3  -7  485.75   29.10
  -2  -3   7  445.66   28.20
  -2  -3   7  463.25   28.20
  -2  -3   7  462.95   27.00
   1   3  -7   76.09   10.70
   1   3  -7   73.69    8.90
   1   3  -7   50.99    8.50
   1   3  -7   45.10    8.60
  -1  -3   7   65.09   10.20
  -1  -3   7   55.39   10.70
   0   3  -7    7.20    6.30
   0   3  -7   -4.30    6.30
   0   3  -7   -7.00    5.00
   0  -3   7    8.80    5.80
  -1   3  -7  184.48   17.30
  -1   3  -7  136.39   13.20
  -1   3  -7  175.68   17.60
   1  -3   7  167.88   16.00
   1  -3   7  169.78   15.30
  -2   3  -7  166.08   27.50
  -2   3  -7  191.18   21.30
   2  -3   7  251.87   22.60
   2  -3   7  261.07   25.90
   2  -3   7  244.18   25.70
   2  -3   7  223.58   25.80
   2  -3   7  243.58   25.30
   2  -3   7  241.08   21.80
   2  -3   7  247.88   22.60
   2  -3   7  285.97   28.50
   2  -3   7  242.88   22.20
   3  -3   7   29.00   12.80
   3  -3   7   46.50   12.40
   3  -3   7   48.40   16.30
   3  -3   7   56.69   14.30
   3  -3   7   69.49   13.70
   3  -3   7   64.59   14.00
   3  -3   7   57.49   13.00
   3  -3   7   78.99   15.00
   4  -3   7  157.28   19.80
   4  -3   7  137.39   19.30
   4  -3   7  161.78   19.00
   4  -3   7  157.58   19.80
   4  -3   7  136.19   20.00
   5  -3   7   21.90    8.50
   5  -3   7    9.90    7.00
   5  -3   7   21.40    7.50
   6   2  -7  302.57   23.90
  -6  -2   7  358.76   34.80
  -6  -2   7  324.27   22.20
   5   2  -7 2702.33  124.59
   5   2  -7 2802.52  129.09
   5   2  -7 2658.83  129.69
  -5  -2   7 2864.01  130.49
  -5  -2   7 2868.31  125.29
   4   2  -7  972.30   53.59
   4   2  -7  945.61   54.39
   4   2  -7  933.91   50.69
   4   2  -7 1000.90   51.39
   4   2  -7  995.50   50.29
   4   2  -7  970.20   47.20
  -4  -2   7  927.01   50.49
  -4  -2   7  958.40   54.39
  -4  -2   7  950.90   48.90
  -4  -2   7  906.01   48.80
  -4  -2   7  855.31   50.29
  -4  -2   7  881.41   46.20
   3   2  -7  241.58   17.90
   3   2  -7  251.47   19.60
   3   2  -7  259.37   20.60
   3   2  -7  257.47   20.00
   3   2  -7  268.47   18.40
  -3  -2   7  243.18   18.20
  -3  -2   7  228.78   19.50
  -3  -2   7  252.87   19.60
  -3  -2   7  230.98   19.90
   2   2  -7 2369.36  108.59
   2   2  -7 2568.54  111.39
   2   2  -7 2393.76  109.99
   2   2  -7 2434.46  111.29
   2   2  -7 2501.55  108.89
  -2  -2   7 2551.74  111.49
  -2  -2   7 2600.84  110.49
  -2  -2   7 2545.25  111.29
   1   2  -7  846.62   40.20
   1   2  -7  784.72   37.50
   1   2  -7  801.52   40.30
   1   2  -7  749.53   38.20
  -1  -2   7  797.02   42.40
  -1  -2   7  877.71   40.60
   0   2  -7   44.20    7.50
   0   2  -7   50.29    8.20
   0   2  -7   40.40    6.60
   0   2  -7   43.90    7.30
   0  -2   7   25.60    6.20
   0  -2   7   26.10    4.80
  -1   2  -7  395.86   22.80
  -1   2  -7  380.96   22.30
  -1   2  -7  348.57   19.20
   1  -2   7  419.06   22.50
   1  -2   7  427.76   24.10
  -2   2  -7 1286.47   61.69
  -2   2  -7 1433.66   63.19
  -2   2  -7 1386.66   64.09
   2  -2   7 1321.27   63.49
   2  -2   7 1312.77   65.09
  -3   2  -7   44.50   11.90
   3  -2   7   80.99   15.00
   3  -2   7   57.79   14.10
   3  -2   7   46.30   13.60
   3  -2   7   86.99   15.00
   3  -2   7   78.99   14.20
   3  -2   7   54.39   12.60
   3  -2   7   77.19   16.20
   3  -2   7   50.39   16.20
  -4   2  -7  305.27   35.00
  -4   2  -7  293.77   20.90
   4  -2   7  303.67   27.50
   4  -2   7  238.28   31.10
   4  -2   7  314.67   27.50
   4  -2   7  323.67   26.70
   4  -2   7  337.57   27.20
   4  -2   7  317.27   27.20
   4  -2   7  293.17   27.00
  -5   2  -7   33.40   12.80
  -5   2  -7   33.50   10.40
   5  -2   7   37.60    9.50
   5  -2   7   23.10    8.30
   5  -2   7   22.10   11.30
   5  -2   7   28.10   10.10
   6   1  -7  339.97   22.50
  -6  -1   7  330.67   21.90
  -6  -1   7  300.27   27.90
   5   1  -7  847.32   47.30
   5   1  -7  978.20   50.99
  -5  -1   7  901.81   56.59
  -5  -1   7  862.21   44.30
  -5  -1   7  866.11   47.30
  -5  -1   7  809.02   47.00
  -5  -1   7  921.41   47.20
   4   1  -7  204.28   25.80
   4   1  -7  174.68   24.10
   4   1  -7  175.58   21.30
  -4  -1   7  129.49   22.50
  -4  -1   7  180.98   16.60
  -4  -1   7  142.59   18.90
  -4  -1   7  137.79   19.70
  -4  -1   7  164.78   17.80
  -4  -1   7  142.99   18.50
  -4  -1   7  133.49   22.90
   3   1  -7  191.98   17.30
   3   1  -7  212.98   17.80
   3   1  -7  174.28   16.60
   3   1  -7  206.68   18.60
   3   1  -7  209.08   17.60
  -3  -1   7  173.68   16.30
  -3  -1   7  177.38   15.10
  -3  -1   7  190.28   15.90
  -3  -1   7  161.78   16.00
  -3  -1   7  189.78   17.40
  -3  -1   7  166.78   16.20
  -3  -1   7  186.18   17.30
   2   1  -7 1276.77   59.19
   2   1  -7 1303.87   61.19
   2   1  -7 1242.58   60.29
   2   1  -7 1279.17   59.29
   2   1  -7 1290.17   60.99
  -2  -1   7 1278.27   58.99
  -2  -1   7 1364.96   60.79
  -2  -1   7 1378.96   58.49
   1   1  -7 1831.12   86.69
   1   1  -7 2142.09   89.29
   1   1  -7 2076.39   88.89
   1   1  -7 2002.80   86.79
  -1  -1   7 2003.10   88.39
  -1  -1   7 1921.71   85.49
   0   1  -7 2655.83  113.69
   0   1  -7 2467.45  110.89
   0   1  -7 2615.84  113.79
   0  -1   7 2660.63  113.99
   0  -1   7 2648.33  113.19
  -1   1  -7  854.61   40.40
  -1   1  -7  850.81   40.80
   1  -1   7  857.31   37.10
   1  -1   7  858.11   41.90
   1  -1   7  837.12   39.80
   1  -1   7  908.01   37.10
  -2   1  -7 5920.31  262.57
  -2   1  -7 6284.67  265.87
  -2   1  -7 6461.95  263.47
   2  -1   7 6200.48  264.07
   2  -1   7 6278.27  266.87
  -3   1  -7    7.10    6.70
  -3   1  -7   -2.40    7.70
  -3   1  -7    7.50    9.40
   3  -1   7   12.40   13.90
   3  -1   7   16.10   11.70
   3  -1   7    2.30    7.00
   3  -1   7    3.50    6.90
   3  -1   7   -1.90   12.90
   3  -1   7   11.90   11.80
  -4   1  -7 1180.58   54.89
   4  -1   7 1194.38   61.89
   4  -1   7 1233.78   61.59
   4  -1   7 1157.38   61.39
   4  -1   7 1127.69   60.59
   4  -1   7 1177.08   60.79
   4  -1   7 1187.88   61.99
   4  -1   7 1175.78   61.19
  -5   1  -7  286.07   24.20
  -5   1  -7  300.07   20.50
   5  -1   7  257.67   25.50
   5  -1   7  285.57   25.10
   5  -1   7  284.77   23.50
   5  -1   7  286.57   24.70
  -6   1  -7  467.25   26.70
  -6   1  -7  438.16   26.20
   6  -1   7  482.85   28.80
   6  -1   7  465.45   27.50
   6   0  -7   47.70    9.30
   6   0  -7   31.50    7.50
  -6   0   7   21.00    6.70
  -6   0   7    7.70    9.10
   5   0  -7  363.16   26.60
  -5   0   7  289.87   25.20
  -5   0   7  298.67   21.70
  -5   0   7  284.37   24.40
  -5   0   7  305.77   23.90
   4   0  -7  243.08   26.40
   4   0  -7  206.78   25.90
   4   0  -7  176.88   23.60
  -4   0   7  245.18   23.80
  -4   0   7  242.48   40.00
  -4   0   7  195.28   22.00
  -4   0   7  254.27   18.90
  -4   0   7  270.87   21.00
  -4   0   7  257.27   20.50
   3   0  -7  194.38   24.60
   3   0  -7  188.28   20.30
   3   0  -7  198.08   18.20
   3   0  -7  164.78   22.70
  -3   0   7  211.08   18.40
  -3   0   7  180.08   15.50
  -3   0   7  192.48   20.70
  -3   0   7  190.98   16.60
  -3   0   7  180.28   16.40
  -3   0   7  180.58   15.90
   2   0  -7   24.30    8.10
   2   0  -7   27.00    6.90
   2   0  -7   30.00    6.50
   2   0  -7   25.90    7.20
  -2   0   7   20.90    7.20
  -2   0   7   19.90    6.80
  -2   0   7   18.80    5.20
  -2   0   7   19.90    7.20
  -2   0   7   30.00    6.60
   1   0  -7 1131.09   50.69
   1   0  -7 1187.18   52.49
   1   0  -7 1183.18   52.69
  -1   0   7 1068.09   50.89
  -1   0   7 1109.99   50.59
  -1   0   7 1073.19   50.89
  -1   0   7 1085.09   48.80
   0   0  -7 3500.95  150.88
   0   0  -7 3333.07  148.79
   0   0  -7 3501.05  150.48
   0   0   7 3445.66  146.59
   0   0   7 3688.63  151.18
   0   0   7 3592.54  150.48
   0   0   7 3494.55  149.09
  -1   0  -7 4724.73  192.88
  -1   0  -7 4607.44  193.28
   1   0   7 4690.53  192.88
   1   0   7 4504.75  193.98
   1   0   7 4202.18  192.68
   1   0   7 4507.35  192.38
  -2   0  -7  578.34   29.80
  -2   0  -7  615.14   30.20
  -2   0  -7  643.54   31.00
  -2   0  -7  668.83   33.60
   2   0   7  696.63   30.20
   2   0   7  661.43   30.70
   2   0   7  721.13   34.50
  -3   0  -7  587.44   30.70
  -3   0  -7  710.53   36.20
   3   0   7  682.43   33.00
   3   0   7  609.94   34.70
  -4   0  -7 1952.40   94.79
  -4   0  -7 2132.89   93.89
  -4   0  -7 2038.20   90.09
  -4   0  -7 1907.11   96.29
  -4   0  -7 1829.92   90.59
   4   0   7 2125.59   96.59
   4   0   7 2048.50   95.59
   4   0   7 2020.90   92.89
   4   0   7 2161.18   96.99
   4   0   7 2135.59   96.39
  -5   0  -7   84.69   19.10
  -5   0  -7   58.69   18.50
  -5   0  -7   79.49   12.40
   5   0   7   99.09   15.10
   5   0   7   88.19   14.70
   5   0   7  122.19   18.30
  -6   0  -7  638.94   34.90
  -6   0  -7  673.33   34.90
   6   0   7  626.94   36.60
   6   0   7  623.34   37.40
   6   0   7  678.03   38.30
   5  -1  -7    5.90    8.80
   5  -1  -7   -1.90    7.90
  -5   1   7   -0.50    9.60
  -5   1   7    5.10    7.70
  -5   1   7   -5.30   10.60
  -5   1   7    2.40    6.80
   4  -1  -7    8.60   16.20
   4  -1  -7   14.80   10.60
  -4   1   7    5.80    9.00
  -4   1   7    1.40   12.10
  -4   1   7    8.10    8.00
  -4   1   7   12.00    7.30
  -4   1   7    5.10    9.50
  -4   1   7    5.10   14.30
   3  -1  -7 1074.49   54.59
   3  -1  -7 1118.09   55.09
   3  -1  -7 1025.60   55.49
   3  -1  -7 1037.00   54.39
   3  -1  -7 1051.09   56.79
  -3   1   7 1077.09   51.09
  -3   1   7 1041.00   53.69
  -3   1   7 1070.69   52.89
  -3   1   7 1055.09   50.39
  -3   1   7 1066.49   52.69
  -3   1   7  878.91   67.79
  -3   1   7 1059.09   53.89
   2  -1  -7  129.49   13.40
   2  -1  -7  125.29   14.00
   2  -1  -7  120.09   20.70
  -2   1   7  103.89   12.00
  -2   1   7  102.89   11.50
  -2   1   7   99.39   12.10
  -2   1   7   99.09   11.50
  -2   1   7  104.29   11.40
  -2   1   7  104.49   10.70
   1  -1  -7  614.14   28.00
  -1   1   7  530.55   27.70
  -1   1   7  530.55   27.90
  -1   1   7  497.35   26.10
  -1   1   7  536.95   27.10
  -1   1   7  507.05   25.80
   0  -1  -7  458.65   22.90
   0  -1  -7  401.36   19.60
   0  -1  -7  441.76   23.10
   0  -1  -7  412.06   21.70
   0   1   7  403.66   20.20
   0   1   7  397.16   22.20
   0   1   7  415.46   21.20
   0   1   7  414.26   21.80
   0   1   7  416.16   24.00
  -1  -1  -7 2082.19   92.29
  -1  -1  -7 2106.79   91.89
  -1  -1  -7 2052.99   90.89
   1   1   7 2116.69   92.09
   1   1   7 2160.58   92.99
   1   1   7 1970.10   91.89
   1   1   7 2246.58   92.59
   1   1   7 2108.99   90.39
  -2  -1  -7 3721.13  159.98
  -2  -1  -7 3756.42  157.18
  -2  -1  -7 3311.57  156.48
  -2  -1  -7 3757.02  157.78
   2   1   7 3886.41  160.18
   2   1   7 3699.73  158.78
   2   1   7 3756.12  157.78
  -3  -1  -7  124.09   13.30
  -3  -1  -7  114.99   10.90
   3   1   7  126.69   10.40
   3   1   7  117.19   10.50
  -4  -1  -7 1004.80   54.89
  -4  -1  -7  969.00   50.09
  -4  -1  -7 1125.89   53.19
  -4  -1  -7 1073.99   49.80
   4   1   7 1077.69   55.59
   4   1   7 1046.00   55.39
   4   1   7 1091.99   55.29
  -5  -1  -7   31.70    8.30
  -5  -1  -7   12.10   21.30
  -5  -1  -7   36.00   12.20
  -5  -1  -7   31.70   10.90
  -5  -1  -7   49.60   10.00
   5   1   7   52.29   11.40
   5   1   7   65.49   14.00
  -6  -1  -7  404.36   24.70
  -6  -1  -7  379.96   37.20
  -6  -1  -7  393.46   25.00
  -6  -1  -7  281.47   31.70
   6   1   7  363.56   26.30
   6   1   7  371.56   27.70
   6   1   7  363.26   28.00
  -7  -1  -7  145.99   14.20
  -7  -1  -7  126.79   18.30
   7   1   7  158.88   15.20
   5  -2  -7   33.10    9.30
   5  -2  -7   40.90    7.90
  -5   2   7   52.79    8.50
  -5   2   7   36.30    8.80
  -5   2   7   52.89   13.00
  -5   2   7   44.20   11.20
   4  -2  -7   62.09   14.00
   4  -2  -7   34.40   11.00
  -4   2   7   50.49    8.80
  -4   2   7   46.40   12.00
  -4   2   7   38.20   10.80
  -4   2   7   36.90   10.10
   3  -2  -7  167.18   25.70
   3  -2  -7  199.38   24.60
   3  -2  -7  152.38   34.50
   3  -2  -7  184.88   23.50
   3  -2  -7  225.78   23.60
  -3   2   7  207.68   17.20
  -3   2   7  188.48   21.70
  -3   2   7  190.38   21.70
  -3   2   7  221.58   19.20
  -3   2   7  192.78   17.10
  -3   2   7  200.68   21.90
   2  -2  -7   59.09   14.90
   2  -2  -7   48.30   11.50
   2  -2  -7   56.49   10.80
   2  -2  -7   57.09   10.80
  -2   2   7   16.10   11.20
  -2   2   7   20.10    7.50
  -2   2   7   41.60    9.10
  -2   2   7   41.20    7.90
  -2   2   7   34.10    8.10
  -2   2   7   35.20    7.50
   1  -2  -7  472.45   24.70
   1  -2  -7  414.96   27.50
   1  -2  -7  469.15   27.20
   1  -2  -7  490.95   27.00
  -1   2   7  425.56   31.20
  -1   2   7  437.16   24.50
  -1   2   7  463.55   24.90
  -1   2   7  446.26   25.80
  -1   2   7  447.06   26.00
  -1   2   7  458.95   24.70
   0  -2  -7  872.41   41.80
   0  -2  -7  927.01   43.80
   0  -2  -7  951.00   43.60
   0  -2  -7  828.52   39.60
   0   2   7  855.11   45.20
   0   2   7  873.91   41.40
   0   2   7  881.51   41.20
   0   2   7  891.81   42.60
   0   2   7  901.51   42.50
  -1  -2  -7  678.63   35.10
  -1  -2  -7  712.23   34.60
  -1  -2  -7  697.93   35.20
  -1  -2  -7  716.53   35.80
   1   2   7  745.63   34.20
   1   2   7  685.93   33.50
   1   2   7  744.03   37.30
   1   2   7  758.22   34.40
   1   2   7  749.92   35.60
   1   2   7  747.13   35.70
  -2  -2  -7  723.83   35.80
  -2  -2  -7  755.72   36.20
  -2  -2  -7  798.12   37.00
  -2  -2  -7  811.32   38.40
   2   2   7  766.42   37.80
   2   2   7  766.82   37.70
   2   2   7  761.92   38.40
   2   2   7  768.42   36.50
   2   2   7  706.93   35.30
  -3  -2  -7  115.29   12.80
  -3  -2  -7   91.29   12.60
  -3  -2  -7   96.89   11.30
  -3  -2  -7  119.29   11.10
   3   2   7  111.69   11.70
   3   2   7  119.59   12.90
   3   2   7  121.59   12.70
  -4  -2  -7  421.36   25.00
  -4  -2  -7  376.06   23.70
  -4  -2  -7  406.66   22.90
  -4  -2  -7  425.66   27.00
  -4  -2  -7  407.66   28.00
   4   2   7  325.47   27.60
   4   2   7  336.57   29.60
   4   2   7  376.16   25.00
  -5  -2  -7  121.89   14.60
  -5  -2  -7   70.49   17.60
  -5  -2  -7   82.69   13.30
  -5  -2  -7   97.39   18.00
  -5  -2  -7   96.69   12.70
   5   2   7   87.69   15.30
   5   2   7   55.79   14.70
  -6  -2  -7   98.49   14.30
  -6  -2  -7   83.99   16.00
  -6  -2  -7   95.49   14.00
  -6  -2  -7  114.69   15.90
  -6  -2  -7   90.79   17.40
   6   2   7  105.59   15.80
   6   2   7  108.79   18.70
   6   2   7   74.79   13.00
   6   2   7  105.79   16.50
  -7  -2  -7   82.89   15.00
  -7  -2  -7  126.79   13.00
  -7  -2  -7   71.19   12.60
   7   2   7  106.89   16.90
   7   2   7  109.89   13.70
   4  -3  -7  138.49   19.10
   4  -3  -7  122.69   15.80
   4  -3  -7  142.49   20.30
  -4   3   7  174.08   17.90
  -4   3   7  111.49   18.20
  -4   3   7  118.39   17.50
  -4   3   7  141.49   14.00
   3  -3  -7   24.20   11.70
   3  -3  -7   26.40   20.40
   3  -3  -7   13.20   17.80
   3  -3  -7   34.20   14.40
   3  -3  -7   11.20   10.40
  -3   3   7   48.50   16.20
  -3   3   7   41.90    9.70
  -3   3   7   29.00    8.40
  -3   3   7   38.10   11.10
  -3   3   7   32.40   10.40
  -3   3   7   25.50   13.90
   2  -3  -7  782.52   44.90
   2  -3  -7  757.62   46.80
   2  -3  -7  704.13   48.60
   2  -3  -7  744.13   46.20
   2  -3  -7  718.53   43.40
   2  -3  -7  825.62   45.50
  -2   3   7  782.22   42.20
  -2   3   7  798.82   39.30
  -2   3   7  766.52   42.80
  -2   3   7  785.42   43.00
  -2   3   7  732.13   39.60
  -2   3   7  754.92   44.20
   1  -3  -7  268.17   22.10
   1  -3  -7  286.37   21.50
   1  -3  -7  265.87   19.90
   1  -3  -7  279.07   42.50
  -1   3   7  269.77   20.20
  -1   3   7  259.97   19.20
  -1   3   7  267.37   20.20
  -1   3   7  253.47   18.20
  -1   3   7  253.07   17.90
   0  -3  -7  216.18   13.90
   0  -3  -7  202.78   17.20
   0  -3  -7  208.28   16.50
   0  -3  -7  211.18   14.70
   0  -3  -7  172.28   20.50
   0   3   7  211.68   16.20
   0   3   7  205.38   15.30
   0   3   7  198.08   23.30
   0   3   7  226.78   16.40
   0   3   7  231.28   15.70
   0   3   7  211.98   15.60
  -1  -3  -7  636.34   32.60
  -1  -3  -7  576.84   30.00
  -1  -3  -7  589.94   31.50
  -1  -3  -7  592.54   30.60
   1   3   7  564.74   30.10
   1   3   7  608.44   31.20
   1   3   7  585.44   30.30
   1   3   7  565.74   35.00
   1   3   7  603.34   31.50
  -2  -3  -7  222.58   16.20
  -2  -3  -7  220.18   16.40
  -2  -3  -7  214.28   15.80
  -2  -3  -7  222.28   16.50
  -2  -3  -7  221.08   15.90
   2   3   7  242.58   18.80
   2   3   7  221.08   16.30
   2   3   7  250.07   16.70
   2   3   7  229.98   15.90
   2   3   7  231.08   16.30
  -3  -3  -7  322.27   21.20
  -3  -3  -7  345.77   21.00
  -3  -3  -7  344.37   22.00
  -3  -3  -7  358.56   24.00
   3   3   7  377.26   22.40
   3   3   7  372.76   24.90
   3   3   7  344.17   22.40
  -4  -3  -7  956.50   47.60
  -4  -3  -7  846.52   47.50
  -4  -3  -7  912.51   43.50
  -4  -3  -7  982.50   46.00
  -4  -3  -7  909.71   43.20
  -4  -3  -7  919.21   48.50
   4   3   7  772.62   47.10
   4   3   7  792.52   44.60
   4   3   7  774.42   47.10
   4   3   7  830.62   47.00
   4   3   7  826.02   45.10
  -5  -3  -7   65.49   11.70
  -5  -3  -7   42.30    9.00
  -5  -3  -7   48.80    9.70
  -5  -3  -7   57.09   14.20
  -5  -3  -7   40.40   11.70
   5   3   7   22.90   11.00
   5   3   7   17.40   12.80
  -6  -3  -7  193.48   18.00
  -6  -3  -7  154.38   22.30
  -6  -3  -7  201.28   16.90
  -6  -3  -7  182.08   23.40
  -6  -3  -7  180.48   22.50
   6   3   7  174.38   19.70
   6   3   7  194.58   22.20
   6   3   7  158.78   22.80
   6   3   7  186.88   21.30
  -7  -3  -7   21.50   14.40
  -7  -3  -7   30.00    9.10
  -7  -3  -7    9.10    9.30
  -7  -3  -7   32.50    7.50
   7   3   7    7.00    8.00
   7   3   7   20.50   12.80
   4  -4  -7   94.89   16.30
   4  -4  -7  100.09   14.50
  -4   4   7  118.59   12.80
  -4   4   7  117.39   20.00
  -4   4   7  105.69   14.70
   3  -4  -7  138.19   16.70
   3  -4  -7  123.09   17.50
   3  -4  -7  136.59   17.30
  -3   4   7  100.19   16.00
  -3   4   7  131.79   18.60
  -3   4   7  119.19   13.90
  -3   4   7  113.79   17.20
   2  -4  -7  195.68   27.50
   2  -4  -7  189.58   34.50
   2  -4  -7  251.27   28.50
   2  -4  -7  248.98   23.70
  -2   4   7  207.38   25.10
  -2   4   7  219.08   21.10
  -2   4   7  261.97   26.50
  -2   4   7  215.58   17.60
  -2   4   7  211.48   22.90
  -2   4   7  211.68   19.00
   1  -4  -7   57.49   12.80
   1  -4  -7   77.59   16.90
   1  -4  -7  107.89   16.30
   1  -4  -7   73.89   15.70
   1  -4  -7   75.89   33.80
  -1   4   7   66.39   12.50
  -1   4   7   65.09   10.50
  -1   4   7   89.99   14.90
  -1   4   7   88.39   13.00
  -1   4   7   90.79   15.70
  -1   4   7   91.59   16.10
   0  -4  -7   15.90    7.90
   0  -4  -7   -0.70   12.80
   0  -4  -7   12.80    9.20
   0  -4  -7   21.10   10.10
   0   4   7    3.40    6.10
   0   4   7   10.70    7.00
   0   4   7   10.60   12.10
   0   4   7    3.30    6.80
   0   4   7   14.10    7.80
   0   4   7    7.60    7.10
  -1  -4  -7  215.98   16.50
  -1  -4  -7  192.18   15.80
  -1  -4  -7  210.18   19.00
  -1  -4  -7  221.58   18.20
   1   4   7  196.78   27.00
   1   4   7  225.28   17.70
   1   4   7  198.88   16.50
   1   4   7  227.48   17.50
   1   4   7  215.18   16.70
   1   4   7  198.28   16.00
  -2  -4  -7   65.99   11.60
  -2  -4  -7   48.40    8.20
  -2  -4  -7   62.29   11.80
  -2  -4  -7   63.99    9.60
  -2  -4  -7   58.49   10.50
   2   4   7   67.89   15.40
   2   4   7   63.39    9.90
   2   4   7   69.69   12.20
   2   4   7   74.89   12.80
   2   4   7   77.79   12.90
   2   4   7   69.29   11.60
   2   4   7   60.69   10.30
  -3  -4  -7  845.22   41.70
  -3  -4  -7  838.02   43.20
  -3  -4  -7  840.62   40.30
  -3  -4  -7  739.63   44.30
  -3  -4  -7  812.82   43.50
  -3  -4  -7  862.01   41.00
   3   4   7  796.22   43.50
   3   4   7  775.92   42.10
   3   4   7  766.12   42.00
   3   4   7  766.62   47.20
  -4  -4  -7  545.65   36.20
  -4  -4  -7  600.24   33.30
  -4  -4  -7  588.94   32.70
  -4  -4  -7  630.94   37.10
  -4  -4  -7  594.54   34.90
  -4  -4  -7  580.04   38.20
   4   4   7  614.04   38.70
   4   4   7  653.13   41.10
   4   4   7  629.74   37.00
   4   4   7  612.84   36.50
  -5  -4  -7  148.49   15.10
  -5  -4  -7  134.99   17.10
  -5  -4  -7  138.09   17.60
  -5  -4  -7  130.69   16.10
  -5  -4  -7  139.39   18.60
   5   4   7  110.79   20.00
   5   4   7  137.59   25.70
   5   4   7  114.59   17.30
  -6  -4  -7  123.79   19.90
  -6  -4  -7  118.29   19.70
  -6  -4  -7  127.09   15.00
  -6  -4  -7  124.89   19.40
  -6  -4  -7  123.79   16.60
   6   4   7  128.09   17.90
   6   4   7  101.69   16.40
   6   4   7  124.59   18.90
  -7  -4  -7   38.20    8.10
  -7  -4  -7   37.80   13.50
  -7  -4  -7   44.70    9.30
  -7  -4  -7   35.60   10.90
   7   4   7   23.10    8.20
   7   4   7   29.10    7.90
   3  -5  -7    3.90   11.70
   3  -5  -7    2.90    6.90
  -3   5   7    8.20   13.60
  -3   5   7   -8.30    8.20
  -3   5   7    7.60    9.60
  -3   5   7   -3.50    6.00
   2  -5  -7  163.38   17.50
   2  -5  -7  146.89   23.80
   2  -5  -7  163.48   20.00
  -2   5   7  188.48   18.30
  -2   5   7  171.88   21.00
  -2   5   7  164.08   21.70
  -2   5   7  164.08   15.70
   1  -5  -7   83.59   20.50
   1  -5  -7  111.69   18.60
   1  -5  -7  135.89   19.20
  -1   5   7  120.39   20.30
  -1   5   7   75.99   16.60
  -1   5   7   92.29   15.00
  -1   5   7   79.49   14.40
  -1   5   7  101.59   13.50
  -1   5   7   96.19   18.70
   0  -5  -7   42.20   13.10
   0   5   7   22.20   10.70
   0   5   7   50.09   12.80
   0   5   7   71.29   12.40
   0   5   7   60.69   12.70
   0   5   7   37.40    9.40
   0   5   7   64.09   13.60
  -1  -5  -7   15.60   13.50
  -1  -5  -7    6.80   11.20
   1   5   7  -17.10   22.50
   1   5   7    3.70    9.20
   1   5   7    4.20    8.20
   1   5   7   -0.40    7.20
   1   5   7    6.60    9.70
   1   5   7    8.00    7.70
   1   5   7   12.20   10.80
  -2  -5  -7 1455.75   67.89
  -2  -5  -7 1455.05   70.99
   2   5   7 1382.46   68.19
   2   5   7 1350.86   68.29
   2   5   7 1397.26   74.29
   2   5   7 1349.47   66.69
   2   5   7 1362.16   67.99
   2   5   7 1334.67   64.39
   2   5   7 1421.46   68.39
  -3  -5  -7  334.87   25.50
  -3  -5  -7  346.27   31.90
  -3  -5  -7  315.27   23.20
  -3  -5  -7  351.26   26.90
  -3  -5  -7  380.06   23.40
  -3  -5  -7  349.37   28.10
  -3  -5  -7  302.27   26.70
   3   5   7  354.56   26.80
   3   5   7  324.47   25.80
   3   5   7  289.07   35.10
   3   5   7  336.87   25.90
   3   5   7  277.17   26.40
   3   5   7  367.96   33.30
   3   5   7  301.07   23.90
  -4  -5  -7  319.27   26.40
  -4  -5  -7  342.77   25.40
  -4  -5  -7  327.47   36.90
  -4  -5  -7  344.37   22.90
  -4  -5  -7  327.07   26.20
  -4  -5  -7  327.27   24.10
  -4  -5  -7  344.07   32.10
   4   5   7  315.87   39.30
   4   5   7  323.47   28.20
   4   5   7  343.87   28.20
   4   5   7  300.67   27.30
   4   5   7  309.37   29.60
  -5  -5  -7   96.49   17.10
  -5  -5  -7   90.49   14.20
  -5  -5  -7  115.59   15.40
  -5  -5  -7   76.69   13.00
  -5  -5  -7   69.09   13.20
  -5  -5  -7  119.29   25.10
   5   5   7   52.39   21.80
   5   5   7  115.99   17.90
   5   5   7   96.49   18.50
   5   5   7  103.09   16.60
   5   5   7   87.99   16.80
   5   5   7  128.49   20.50
  -6  -5  -7  152.68   21.10
  -6  -5  -7  199.08   22.70
  -6  -5  -7  173.68   19.40
  -6  -5  -7  173.28   23.50
  -6  -5  -7  175.48   17.00
   6   5   7  162.08   19.20
  -7  -5  -7  302.17   20.10
  -7  -5  -7  315.47   20.80
  -7  -5  -7  281.87   24.90
   7   5   7  290.97   20.30
   7   5   7  282.37   22.00
   2  -6  -7   50.19    9.50
  -2   6   7   67.09   10.90
  -2   6   7   48.40   11.40
  -2   6   7   69.39   11.50
   1  -6  -7   71.09   11.20
   1  -6  -7   59.19   12.90
  -1   6   7   79.49   11.10
  -1   6   7   66.29   12.40
  -1   6   7   73.39   15.60
  -1   6   7   73.79   13.00
   0  -6  -7   59.49   12.70
   0  -6  -7   51.89   11.70
   0   6   7   12.70   16.20
   0   6   7   36.30   14.70
   0   6   7   49.50    9.80
   0   6   7   37.50   27.10
   0   6   7   20.90    9.70
   0   6   7   41.90   12.50
  -1  -6  -7   33.10   12.10
   1   6   7   13.90   12.40
   1   6   7   12.50    9.60
   1   6   7   29.70   13.50
   1   6   7    8.70    7.90
   1   6   7   45.00   15.50
   1   6   7   21.40   11.30
   1   6   7   20.00   15.70
  -2  -6  -7 1312.27   68.89
  -2  -6  -7 1409.46   70.59
  -2  -6  -7 1376.06   66.79
   2   6   7 1409.96   70.49
   2   6   7 1337.97   76.69
   2   6   7 1341.97   66.29
   2   6   7 1407.86   65.19
   2   6   7 1458.55   69.09
   2   6   7 1271.07   70.79
   2   6   7 1382.96   70.69
   2   6   7 1397.66   68.19
  -3  -6  -7   80.19   16.20
  -3  -6  -7   71.79   14.10
   3   6   7  104.09   17.20
   3   6   7  104.99   17.80
   3   6   7  128.89   19.80
   3   6   7   97.09   16.50
   3   6   7   95.59   19.80
   3   6   7  116.59   20.80
  -4  -6  -7  137.89   22.70
  -4  -6  -7  153.08   26.70
  -4  -6  -7  124.79   19.70
  -4  -6  -7  144.79   20.00
   4   6   7  122.99   19.60
   4   6   7  119.69   19.70
   4   6   7  156.88   25.40
   4   6   7  108.99   18.50
  -5  -6  -7  196.68   23.80
  -5  -6  -7  182.18   20.30
  -5  -6  -7  167.98   23.40
  -5  -6  -7  152.08   21.70
   5   6   7  193.58   21.50
   5   6   7  189.08   31.70
   5   6   7  174.78   25.30
   5   6   7  226.28   23.90
  -6  -6  -7   11.90   11.10
  -6  -6  -7   16.20    8.20
  -6  -6  -7    7.10   13.10
  -6  -6  -7   -7.20   16.00
  -6  -6  -7   21.80   18.10
   6   6   7   14.40    8.50
  -7  -6  -7  139.99   12.70
  -7  -6  -7  108.79   19.40
   7   6   7  104.09   13.60
   7   6   7  119.39   13.30
  -1   7   7  304.07   19.70
  -1   7   7  344.07   21.90
  -1   7   7  289.57   32.70
   0  -7  -7  100.09   15.60
   0  -7  -7  111.19   14.70
   0  -7  -7   94.29   13.90
   0   7   7  120.39   17.60
   0   7   7  163.68   32.60
   0   7   7  111.79   17.40
   0   7   7  121.09   14.10
  -1  -7  -7   60.39   12.00
  -1  -7  -7   43.90   10.40
   1   7   7   52.89    9.80
   1   7   7   65.79   19.10
   1   7   7   82.99   13.80
  -2  -7  -7  194.58   24.50
  -2  -7  -7  218.18   22.00
   2   7   7  243.58   22.50
   2   7   7  245.18   19.60
   2   7   7  206.38   30.00
   2   7   7  235.08   24.40
  -3  -7  -7  369.26   29.40
  -3  -7  -7  317.27   28.20
   3   7   7  392.96   35.00
   3   7   7  379.56   26.80
   3   7   7  432.06   38.10
   3   7   7  391.56   27.60
  -4  -7  -7   58.99   12.00
  -4  -7  -7   45.70   12.50
   4   7   7   30.30   18.80
   4   7   7   24.90   10.40
   4   7   7   31.00   14.50
  -5  -7  -7  179.58   21.60
  -5  -7  -7  181.08   26.70
  -5  -7  -7  169.88   22.60
  -5  -7  -7  170.68   18.10
   5   7   7  169.38   22.10
   5   7   7  145.19   17.60
  -6  -7  -7   -3.10   11.60
  -6  -7  -7    9.90   13.90
  -6  -7  -7    6.40    7.10
   6   7   7   -2.00    7.50
  -1  -8  -7   -0.50    6.00
  -1  -8  -7    6.80    8.60
  -1  -8  -7    4.60    6.20
   1   8   7    4.30    7.20
   1   8   7   12.90    7.50
  -2  -8  -7   29.80    7.20
  -2  -8  -7   35.00    7.90
   2   8   7   29.90   16.30
   2   8   7   19.80    8.50
  -3  -8  -7   41.40    9.50
   3   8   7   61.39   12.40
   3   8   7   65.49   23.50
   3   8   7   46.60    9.80
  -4  -8  -7  108.09   16.10
   4   8   7  128.19   15.30
   4   8   7  121.59   18.70
  -5  -8  -7    8.30    7.00
  -5  -8  -7    5.30   13.50
  -5  -8  -7   11.10    8.40
   5   8   7   -1.50   10.30
   5   8   7    8.70    7.10
   3   8  -8   -1.40    6.00
   3   8  -8   13.80   10.30
  -3  -8   8    4.40    7.10
  -3  -8   8    9.60    6.30
   2   8  -8   11.10    6.50
  -2  -8   8   -1.30    7.70
  -2  -8   8    7.20    5.30
   5   7  -8   42.90    9.30
  -5  -7   8   64.49    9.60
  -5  -7   8   47.60    8.10
   4   7  -8   61.09   11.00
   4   7  -8   44.40   11.00
   4   7  -8   66.09   11.60
  -4  -7   8   41.20    9.60
  -4  -7   8   31.70    7.40
   3   7  -8  108.19   14.90
   3   7  -8  132.69   14.70
   3   7  -8  128.39   16.70
  -3  -7   8  107.89   16.60
  -3  -7   8  115.69   14.40
   2   7  -8   90.59   14.90
   2   7  -8   91.89   17.60
   2   7  -8   97.89   14.30
  -2  -7   8   67.09   11.30
  -2  -7   8  108.69   13.50
   1   7  -8  371.06   23.80
   1   7  -8  408.56   24.20
  -1  -7   8  360.06   22.80
  -1  -7   8  361.46   38.30
  -1  -7   8  357.46   25.90
  -1  -7   8  345.27   25.10
   0   7  -8   31.30   10.00
   0   7  -8   13.70    9.70
   0  -7   8   15.30    6.30
   0  -7   8   15.60    9.90
   0  -7   8    7.70    7.30
   0  -7   8   21.60   18.20
   1  -7   8   23.80    6.60
   1  -7   8   19.80   13.60
   1  -7   8   31.70    6.40
   6   6  -8  147.09   13.40
   6   6  -8  132.19   19.90
  -6  -6   8  193.68   14.00
  -6  -6   8  181.08   14.40
   5   6  -8  171.58   29.40
   5   6  -8  222.08   19.10
   5   6  -8  262.87   19.70
  -5  -6   8  230.88   19.50
  -5  -6   8  243.48   19.10
   4   6  -8   11.40    7.30
   4   6  -8    7.80   17.90
   4   6  -8    1.20    9.60
   4   6  -8    1.70    9.70
  -4  -6   8    7.40    7.90
  -4  -6   8   10.30    9.20
   3   6  -8  229.28   19.20
   3   6  -8  148.29   29.30
   3   6  -8  209.58   17.90
   3   6  -8  220.98   24.50
  -3  -6   8  177.48   19.30
  -3  -6   8  231.68   22.00
  -3  -6   8  200.28   19.30
   2   6  -8  133.39   15.70
   2   6  -8   70.09   20.40
   2   6  -8  135.79   15.90
   2   6  -8  105.79   18.70
   2   6  -8  131.89   25.00
  -2  -6   8  113.89   23.40
  -2  -6   8   82.29   26.90
  -2  -6   8  111.49   15.30
  -2  -6   8  146.79   23.80
   1   6  -8  418.76   25.70
   1   6  -8  407.76   39.70
   1   6  -8  401.26   26.40
  -1  -6   8  339.87   29.00
  -1  -6   8  415.66   29.80
  -1  -6   8  467.25   27.20
  -1  -6   8  450.35   41.30
   0   6  -8    0.20    8.60
   0   6  -8   -9.30   11.00
   0  -6   8   17.80   10.10
   0  -6   8    1.20   10.90
   0  -6   8   -0.40   11.50
   0  -6   8    4.60    7.40
  -1   6  -8  266.47   23.40
   1  -6   8  312.97   23.80
   1  -6   8  344.67   25.70
   1  -6   8  329.97   24.50
   1  -6   8  355.66   30.50
   1  -6   8  362.66   22.40
   2  -6   8  134.09   18.40
   2  -6   8  160.88   15.30
   2  -6   8  158.38   20.40
   2  -6   8  136.89   15.10
   2  -6   8  147.79   15.10
   6   5  -8  432.86   33.00
   6   5  -8  450.65   26.40
  -6  -5   8  504.95   27.70
  -6  -5   8  476.55   28.10
   5   5  -8  256.07   36.40
   5   5  -8  210.08   28.80
   5   5  -8  264.87   20.70
   5   5  -8  237.28   20.50
  -5  -5   8  251.07   21.90
  -5  -5   8  229.08   21.40
   4   5  -8  360.16   38.30
   4   5  -8  372.46   28.70
   4   5  -8  376.26   26.40
   4   5  -8  342.47   32.20
   4   5  -8  359.36   24.10
  -4  -5   8  351.26   28.40
  -4  -5   8  367.76   27.40
  -4  -5   8  297.67   35.00
   3   5  -8  431.86   33.20
   3   5  -8  479.45   28.30
   3   5  -8  394.66   34.20
   3   5  -8  473.85   27.80
   3   5  -8  407.16   34.00
  -3  -5   8  472.25   31.60
  -3  -5   8  471.65   30.10
  -3  -5   8  416.26   30.10
  -3  -5   8  471.05   35.50
   2   5  -8   53.29   17.20
   2   5  -8   59.99   10.40
   2   5  -8   51.99    9.70
   2   5  -8   43.80   13.50
   2   5  -8   48.60   14.40
  -2  -5   8   59.99   11.30
  -2  -5   8   51.59   19.00
  -2  -5   8   57.29   18.00
  -2  -5   8   47.60   10.90
  -2  -5   8   53.79   12.70
  -2  -5   8   42.20   13.50
   1   5  -8  659.23   34.10
   1   5  -8  664.83   42.10
   1   5  -8  610.04   34.80
   1   5  -8  679.13   41.80
  -1  -5   8  588.74   39.80
  -1  -5   8  636.74   44.00
  -1  -5   8  659.03   39.60
  -1  -5   8  647.04   35.50
  -1  -5   8  587.64   38.90
   0   5  -8  123.79   20.20
   0   5  -8  102.19   13.20
   0   5  -8   81.99   13.90
   0   5  -8  110.79   18.80
   0  -5   8   88.29   15.10
   0  -5   8   65.79   16.00
   0  -5   8   82.09   15.10
   0  -5   8   98.09   15.90
   0  -5   8   76.59   12.30
  -1   5  -8  423.56   26.70
   1  -5   8  486.25   33.70
   1  -5   8  549.54   72.59
   1  -5   8  476.55   29.10
   1  -5   8  482.85   33.40
   1  -5   8  466.55   31.80
   1  -5   8  486.45   32.70
   2  -5   8  157.98   20.60
   2  -5   8  167.78   20.60
   2  -5   8  151.98   17.40
   2  -5   8  157.18   22.10
   2  -5   8  178.48   18.50
   2  -5   8  144.99   18.70
   3  -5   8   84.99   13.40
   3  -5   8   72.69   11.40
   3  -5   8   79.39   13.70
   3  -5   8   90.29   15.00
   6   4  -8  190.78   21.80
   6   4  -8  174.28   17.30
  -6  -4   8  189.38   19.00
  -6  -4   8  200.68   18.90
  -6  -4   8  182.08   16.60
   5   4  -8  101.59   18.30
   5   4  -8   59.29   16.00
   5   4  -8  102.09   17.20
  -5  -4   8   94.69   14.80
  -5  -4   8  121.09   19.20
   4   4  -8  339.37   29.70
   4   4  -8  284.67   31.30
   4   4  -8  346.47   26.90
   4   4  -8  354.36   24.90
   4   4  -8  353.66   22.90
  -4  -4   8  334.77   28.10
  -4  -4   8  295.47   28.70
  -4  -4   8  290.17   29.50
   3   4  -8  176.68   21.50
   3   4  -8  163.58   23.70
   3   4  -8  225.48   17.60
   3   4  -8  197.98   22.70
   3   4  -8  183.78   26.10
   3   4  -8  196.08   17.20
  -3  -4   8  202.78   22.10
  -3  -4   8  207.48   23.70
  -3  -4   8  183.68   20.60
   2   4  -8  303.37   20.90
   2   4  -8  308.77   24.40
   2   4  -8  277.47   26.00
   2   4  -8  276.87   31.40
   2   4  -8  299.57   23.80
   2   4  -8  299.57   19.80
  -2  -4   8  288.57   23.80
  -2  -4   8  330.07   27.30
  -2  -4   8  274.77   24.60
  -2  -4   8  288.87   23.20
   1   4  -8   41.50    9.90
   1   4  -8   20.20   10.10
   1   4  -8   35.40   10.30
   1   4  -8   32.50    7.20
   1   4  -8   30.40   10.40
  -1  -4   8   59.69   16.00
  -1  -4   8   63.99   12.00
  -1  -4   8   41.80   14.30
  -1  -4   8   20.60    9.40
  -1  -4   8   50.69   13.30
  -1  -4   8   44.20    9.00
   0   4  -8  486.85   35.90
   0   4  -8  533.85   33.10
   0   4  -8  530.55   27.70
   0   4  -8  570.64   34.40
   0  -4   8  535.75   34.80
   0  -4   8  551.14   34.50
   0  -4   8  545.85   34.80
   0  -4   8  548.15   36.00
   0  -4   8  544.85   31.20
  -1   4  -8  509.95   35.90
  -1   4  -8  499.75   40.00
   1  -4   8  554.54   35.40
   1  -4   8  557.44   35.10
   1  -4   8  553.14   35.00
   1  -4   8  528.85   36.10
   1  -4   8  527.75   41.80
   1  -4   8  515.95   41.20
   1  -4   8  554.84   37.70
   1  -4   8  550.24   32.00
   1  -4   8  514.55   34.90
   2  -4   8   24.90   12.50
   2  -4   8   48.60   11.60
   2  -4   8   45.10   11.90
   2  -4   8   35.60   15.70
   2  -4   8   33.00   18.40
   2  -4   8   52.29   14.40
   2  -4   8   35.70   15.50
   2  -4   8   56.19   14.50
   2  -4   8   45.20   13.30
   3  -4   8  120.89   18.70
   3  -4   8   49.50   12.80
   3  -4   8   84.99   13.20
   3  -4   8   87.39   15.60
   3  -4   8  109.99   16.50
   3  -4   8   76.09   12.30
   4  -4   8   94.29   15.00
   4  -4   8   94.69   13.50
   4  -4   8   79.69   11.20
   4  -4   8   80.69   13.40
   6   3  -8   21.60    9.80
   6   3  -8   29.10   10.60
  -6  -3   8   12.90    7.30
  -6  -3   8    2.70   11.60
  -6  -3   8   11.20   10.80
   5   3  -8  607.74   35.80
   5   3  -8  587.74   41.30
  -5  -3   8  595.74   35.20
  -5  -3   8  603.34   39.50
   4   3  -8  345.67   23.60
   4   3  -8  358.86   37.70
   4   3  -8  377.66   26.80
   4   3  -8  371.76   26.70
   4   3  -8  299.57   36.40
   4   3  -8  389.16   29.30
   4   3  -8  332.17   29.30
  -4  -3   8  301.37   29.20
  -4  -3   8  347.77   26.60
  -4  -3   8  349.77   30.00
   3   3  -8  291.47   25.60
   3   3  -8  313.87   21.40
   3   3  -8  319.47   24.60
   3   3  -8  266.87   26.30
   3   3  -8  292.87   20.80
   3   3  -8  314.87   24.70
  -3  -3   8  332.97   26.80
  -3  -3   8  335.67   25.00
  -3  -3   8  256.07   28.50
   2   3  -8 1145.09   59.69
   2   3  -8 1265.27   62.49
   2   3  -8 1249.68   58.09
   2   3  -8 1279.97   61.89
   2   3  -8 1269.07   58.29
  -2  -3   8 1299.97   62.29
   1   3  -8   28.10    8.60
   1   3  -8   41.90    7.00
   1   3  -8   45.30    8.90
   1   3  -8   40.40    9.00
   1   3  -8   38.40    8.70
  -1  -3   8   22.60    7.70
   0   3  -8 1129.99   54.99
   0   3  -8 1187.78   56.19
   0   3  -8 1033.20   52.39
   0   3  -8 1046.80   49.70
   0  -3   8 1175.78   55.59
  -1   3  -8  312.47   24.10
  -1   3  -8  307.87   24.00
  -1   3  -8  263.47   22.40
  -1   3  -8  322.87   22.70
   1  -3   8  285.37   21.30
   1  -3   8  290.77   27.20
   1  -3   8  298.67   22.10
   1  -3   8  302.57   23.50
   1  -3   8  273.97   24.80
   2  -3   8   13.10   10.40
   2  -3   8   18.80   11.40
   2  -3   8   23.50   14.70
   2  -3   8   26.50   12.30
   2  -3   8    9.60   10.80
   2  -3   8   15.90   13.40
   2  -3   8   13.00   12.20
   2  -3   8   22.70   11.40
   2  -3   8   36.30   13.30
   3  -3   8  188.88   22.10
   3  -3   8  190.38   23.60
   3  -3   8  184.68   23.90
   3  -3   8  153.38   23.90
   3  -3   8  199.18   23.90
   3  -3   8  178.68   27.30
   3  -3   8  156.68   23.70
   3  -3   8  187.28   23.50
   4  -3   8   64.89   12.20
   4  -3   8   49.99   10.40
   4  -3   8   98.19   14.40
   4  -3   8   60.19   11.90
   4  -3   8   64.19   11.70
   5  -3   8   16.60    7.20
   5  -3   8   30.60    9.60
   5  -3   8   31.90    7.70
   6   2  -8   11.20    8.40
  -6  -2   8    3.20   13.40
  -6  -2   8    9.40    6.60
   5   2  -8   63.59   12.90
   5   2  -8   49.10   13.60
  -5  -2   8   64.09   15.80
  -5  -2   8   58.79   11.30
   4   2  -8  279.37   35.90
   4   2  -8  260.27   27.40
   4   2  -8  298.97   24.30
   4   2  -8  209.38   31.10
   4   2  -8  270.47   22.60
  -4  -2   8  258.77   29.20
  -4  -2   8  264.47   26.80
  -4  -2   8  290.27   23.30
   3   2  -8   47.00   12.10
   3   2  -8   46.30   11.20
   3   2  -8   63.29   11.90
   3   2  -8   40.90    8.50
   3   2  -8   46.50    8.80
  -3  -2   8   45.30   10.80
  -3  -2   8   41.70   13.90
  -3  -2   8   33.40   12.60
   2   2  -8  181.08   15.20
   2   2  -8  181.08   16.00
   2   2  -8  202.78   16.30
   2   2  -8  195.38   14.50
   2   2  -8  179.88   16.60
  -2  -2   8  141.99   15.10
   1   2  -8 1826.22   84.69
   1   2  -8 1920.41   84.89
   1   2  -8 1824.42   81.39
   1   2  -8 1665.53   81.69
  -1  -2   8 2005.10   85.19
  -1  -2   8 1906.01   86.99
   0   2  -8  154.68   13.30
   0   2  -8  144.09   13.40
   0   2  -8  188.08   14.40
   0   2  -8  152.38   11.00
   0  -2   8  159.68   11.80
   0  -2   8  152.48   13.50
  -1   2  -8   28.70    6.70
  -1   2  -8   31.30    7.50
   1  -2   8   38.20    7.40
   1  -2   8   37.00    8.50
  -2   2  -8   94.39   17.20
  -2   2  -8   74.99   11.50
  -2   2  -8   93.69   16.50
  -2   2  -8   68.49   12.20
   2  -2   8   84.29   16.20
   2  -2   8   87.99   13.40
   2  -2   8   72.39   13.70
   2  -2   8   87.49   13.80
  -3   2  -8   25.30   12.70
   3  -2   8   40.00   13.50
   3  -2   8   22.40   10.80
   3  -2   8   42.30   13.40
   3  -2   8   32.70   12.40
   3  -2   8   39.80   13.00
   3  -2   8   21.20   12.90
   3  -2   8   32.40   14.20
   3  -2   8   59.49   14.40
   3  -2   8   13.80   12.10
  -4   2  -8  605.54   33.30
   4  -2   8  619.04   39.80
   4  -2   8  675.03   40.30
   4  -2   8  594.44   46.70
   4  -2   8  650.43   40.00
   4  -2   8  613.64   38.60
   4  -2   8  634.14   39.30
   4  -2   8  683.83   39.20
  -5   2  -8  282.27   22.80
   5  -2   8  315.97   25.40
   5  -2   8  327.47   24.30
   5  -2   8  312.37   22.90
   5  -2   8  318.17   23.50
   6   1  -8    5.10    7.00
   6   1  -8   19.90    7.90
  -6  -1   8   26.70    6.70
   5   1  -8   58.89   13.40
   5   1  -8   68.29   13.40
  -5  -1   8   74.99   12.50
  -5  -1   8   96.49   20.20
  -5  -1   8   71.49   14.10
   4   1  -8  267.77   28.90
   4   1  -8  236.88   23.60
   4   1  -8  257.17   28.90
  -4  -1   8  239.48   31.20
  -4  -1   8  230.98   21.20
  -4  -1   8  214.18   30.30
  -4  -1   8  226.98   20.60
  -4  -1   8  243.78   26.80
  -4  -1   8  234.78   22.50
   3   1  -8  642.84   36.20
   3   1  -8  620.34   33.10
   3   1  -8  597.94   31.80
   3   1  -8  647.64   35.30
   3   1  -8  604.14   36.00
   3   1  -8  552.34   44.00
  -3  -1   8  572.44   32.30
  -3  -1   8  551.74   31.70
  -3  -1   8  576.64   34.80
  -3  -1   8  543.15   31.80
  -3  -1   8  556.34   39.90
  -3  -1   8  573.84   33.60
   2   1  -8  636.74   33.20
   2   1  -8  629.74   31.00
   2   1  -8  656.03   32.90
   2   1  -8  605.84   30.40
   2   1  -8  593.44   31.50
  -2  -1   8  523.65   30.40
  -2  -1   8  554.44   29.50
  -2  -1   8  545.05   31.40
   1   1  -8 3649.63  161.28
   1   1  -8 3682.83  158.78
   1   1  -8 3748.72  161.28
  -1  -1   8 3722.23  157.48
  -1  -1   8 3766.52  160.78
   0   1  -8   24.10    5.30
   0   1  -8   20.40    4.90
   0   1  -8   21.00    4.80
   0  -1   8   37.20    7.80
   0  -1   8   33.10    6.80
  -1   1  -8  283.97   17.60
  -1   1  -8  295.97   18.20
   1  -1   8  273.87   18.70
   1  -1   8  287.47   14.30
   1  -1   8  294.87   14.20
  -2   1  -8  418.76   22.50
  -2   1  -8  376.56   21.60
  -2   1  -8  408.86   24.60
   2  -1   8  361.26   24.00
   2  -1   8  354.96   21.80
  -3   1  -8  279.87   26.20
   3  -1   8  377.76   28.40
   3  -1   8  367.36   27.80
   3  -1   8  333.87   23.10
   3  -1   8  315.37   24.30
   3  -1   8  297.17   28.30
   3  -1   8  361.66   27.10
   3  -1   8  368.66   27.80
  -4   1  -8 1421.16   60.39
  -4   1  -8 1188.98   65.09
   4  -1   8 1216.78   65.89
   4  -1   8 1325.67   66.49
   4  -1   8 1374.56   66.99
   4  -1   8 1251.97   66.19
   4  -1   8 1360.16   67.49
   4  -1   8 1255.97   65.89
   4  -1   8 1304.77   66.39
  -5   1  -8  283.57   25.00
  -5   1  -8  285.27   21.30
   5  -1   8  328.97   25.00
   5  -1   8  357.36   26.30
   5  -1   8  337.47   27.00
  -6   1  -8  119.49   16.60
   6  -1   8   84.19   12.30
   6  -1   8  106.49   12.90
   6   0  -8   75.09   11.90
   6   0  -8   71.79   10.90
  -6   0   8   87.79   10.60
   5   0  -8  115.19   17.60
  -5   0   8  126.89   15.80
  -5   0   8  142.79   16.30
  -5   0   8  141.59   24.20
  -5   0   8  140.29   20.00
   4   0  -8  150.28   22.20
   4   0  -8  161.68   22.70
   4   0  -8  115.09   22.20
   4   0  -8  142.49   23.60
  -4   0   8  132.29   20.00
  -4   0   8  144.39   18.80
  -4   0   8  139.59   23.90
  -4   0   8  141.39   16.30
  -4   0   8  158.18   25.10
  -4   0   8  160.88   18.50
  -4   0   8  140.09   18.80
   3   0  -8  947.71   49.70
   3   0  -8  927.01   47.20
   3   0  -8  924.81   52.19
   3   0  -8  846.72   47.30
   3   0  -8  923.81   48.10
  -3   0   8  856.81   45.80
  -3   0   8  882.31   45.60
  -3   0   8  878.11   46.30
  -3   0   8  883.01   43.40
  -3   0   8  784.92   54.19
  -3   0   8  890.41   45.30
  -3   0   8  849.41   44.00
   2   0  -8 1172.78   54.79
   2   0  -8 1235.98   57.89
   2   0  -8 1214.68   57.39
   2   0  -8 1214.08   55.09
  -2   0   8 1152.48   54.99
  -2   0   8 1127.09   54.59
  -2   0   8 1126.09   54.09
  -2   0   8 1172.78   55.19
  -2   0   8 1176.48   55.29
  -2   0   8 1180.48   53.39
   1   0  -8  475.95   26.50
   1   0  -8  519.15   28.70
   1   0  -8  482.85   28.10
  -1   0   8  563.44   27.80
  -1   0   8  555.14   26.80
  -1   0   8  572.34   27.60
  -1   0   8  518.75   24.40
   0   0  -8  150.78   12.30
   0   0  -8  171.48   11.40
   0   0  -8  172.98   12.50
   0   0   8  170.18   12.40
   0   0   8  168.48   11.10
   0   0   8  174.78   12.80
   0   0   8  153.48   12.90
  -1   0  -8 1155.18   52.59
  -1   0  -8 1086.29   50.19
  -1   0  -8 1178.88   51.99
   1   0   8 1153.58   52.19
   1   0   8 1152.48   53.19
   1   0   8 1045.80   51.29
   1   0   8 1154.18   51.49
  -2   0  -8 3938.81  158.18
  -2   0  -8 3471.95  153.68
  -2   0  -8 3779.32  154.88
  -2   0  -8 3347.57  152.68
   2   0   8 3600.64  157.68
   2   0   8 3629.44  153.08
   2   0   8 3504.25  153.18
  -3   0  -8  133.19   12.50
  -3   0  -8  146.49   17.00
   3   0   8  198.58   14.80
   3   0   8  206.68   17.10
  -4   0  -8  893.01   51.59
  -4   0  -8  789.22   44.20
  -4   0  -8  937.11   43.10
  -4   0  -8  953.10   47.50
   4   0   8  864.81   48.90
   4   0   8  824.32   48.40
   4   0   8  872.71   49.00
   4   0   8  894.71   50.09
  -5   0  -8  445.26   30.00
  -5   0  -8  475.95   38.90
  -5   0  -8  480.15   29.00
  -5   0  -8  453.35   37.40
   5   0   8  545.95   34.40
   5   0   8  522.85   33.90
   5   0   8  590.24   35.70
  -6   0  -8   43.70    9.70
  -6   0  -8   46.50    9.30
   6   0   8   45.90   10.70
   6   0   8   37.30    9.10
   5  -1  -8   30.40    8.80
   5  -1  -8   36.20   10.60
  -5   1   8   20.20   11.20
  -5   1   8   35.40   14.30
  -5   1   8   31.20    8.70
  -5   1   8   36.70    8.90
   4  -1  -8  145.99   23.10
  -4   1   8  122.59   14.80
  -4   1   8  137.79   22.60
  -4   1   8  110.19   21.00
  -4   1   8  103.59   15.40
  -4   1   8  112.89   17.20
  -4   1   8  115.89   17.20
   3  -1  -8 1555.74   81.19
   3  -1  -8 1566.34   79.99
   3  -1  -8 1554.14   77.59
   3  -1  -8 1553.34   80.59
   3  -1  -8 1476.25   78.59
  -3   1   8 1671.53   77.99
  -3   1   8 1641.84   77.39
  -3   1   8 1783.72   79.79
  -3   1   8 1774.02   78.49
  -3   1   8 1786.32   75.69
  -3   1   8 1644.74   87.79
  -3   1   8 1721.93   76.29
   2  -1  -8  902.71   45.00
   2  -1  -8  894.41   47.10
   2  -1  -8  817.02   43.80
   2  -1  -8  932.81   47.00
   2  -1  -8  862.61   45.80
  -2   1   8  906.61   43.60
  -2   1   8  891.81   43.40
  -2   1   8  896.81   42.90
  -2   1   8  900.21   45.20
  -2   1   8  917.51   44.90
   1  -1  -8  171.78   14.40
   1  -1  -8  146.99   14.70
   1  -1  -8  168.78   14.80
   1  -1  -8  173.78   14.30
   1  -1  -8  158.28   12.70
  -1   1   8  208.08   18.40
  -1   1   8  192.08   13.90
  -1   1   8  190.58   13.00
  -1   1   8  210.38   15.50
  -1   1   8  189.78   12.50
  -1   1   8  205.78   15.20
   0  -1  -8 1253.57   58.29
   0  -1  -8 1324.07   59.09
   0  -1  -8 1232.58   56.59
   0  -1  -8 1176.58   54.49
   0   1   8 1246.88   57.49
   0   1   8 1258.17   56.69
   0   1   8 1246.78   55.19
   0   1   8 1270.77   57.39
   0   1   8 1303.17   59.79
  -1  -1  -8 1411.76   66.09
  -1  -1  -8 1412.66   65.49
  -1  -1  -8 1335.57   64.19
   1   1   8 1456.75   65.49
   1   1   8 1555.14   66.29
   1   1   8 1492.05   66.69
   1   1   8 1455.45   63.49
   1   1   8 1517.05   65.89
  -2  -1  -8 1075.99   47.00
  -2  -1  -8 1111.19   48.10
  -2  -1  -8  994.80   46.70
  -2  -1  -8 1112.99   50.39
   2   1   8  991.10   48.10
   2   1   8  935.71   46.60
   2   1   8  958.80   49.10
  -3  -1  -8  389.56   22.70
  -3  -1  -8  423.66   27.00
   3   1   8  454.35   23.60
  -4  -1  -8  113.39   12.50
  -4  -1  -8   91.09   14.80
  -4  -1  -8  127.29   20.00
  -4  -1  -8  121.69   15.20
   4   1   8  123.39   17.50
   4   1   8   91.09   15.50
   4   1   8  107.89   19.40
   4   1   8  101.09   16.30
  -5  -1  -8  109.79   15.90
  -5  -1  -8  127.09   18.50
  -5  -1  -8  129.19   14.80
  -5  -1  -8  119.29   19.40
   5   1   8  121.09   19.30
   5   1   8  136.09   19.60
   5   1   8  131.49   19.40
  -6  -1  -8   58.29   21.20
   6   1   8   27.50    8.20
   6   1   8   38.50   10.20
   6   1   8   42.30   10.10
  -7  -1  -8  110.59   11.70
   7   1   8  100.79   12.30
   7   1   8   67.69   11.70
   5  -2  -8   46.40    9.60
   5  -2  -8   45.80    7.70
  -5   2   8   33.50   11.50
  -5   2   8   25.90    8.00
  -5   2   8   22.10    8.10
   4  -2  -8  221.08   23.60
   4  -2  -8  287.07   23.10
  -4   2   8  261.77   19.30
  -4   2   8  265.67   22.20
  -4   2   8  239.18   23.20
  -4   2   8  253.77   21.70
   3  -2  -8 1075.69   57.39
   3  -2  -8  942.61   57.99
   3  -2  -8  960.50   56.69
   3  -2  -8 1017.80   59.39
  -3   2   8 1125.69   52.59
  -3   2   8 1134.49   55.79
  -3   2   8 1137.29   59.39
  -3   2   8 1144.19   53.89
  -3   2   8 1118.99   57.79
  -3   2   8 1128.69   55.89
   2  -2  -8  469.45   33.50
   2  -2  -8  513.65   35.80
   2  -2  -8  519.65   32.80
   2  -2  -8  478.05   33.50
   2  -2  -8  450.25   30.30
  -2   2   8  485.95   31.30
  -2   2   8  502.95   30.20
  -2   2   8  521.95   28.80
  -2   2   8  541.35   30.70
  -2   2   8  499.95   27.80
  -2   2   8  553.34   32.20
   1  -2  -8   79.29   11.00
   1  -2  -8   90.29   12.10
   1  -2  -8   83.89   13.10
   1  -2  -8   85.09   13.10
   1  -2  -8   64.49   11.20
  -1   2   8   72.59   11.30
  -1   2   8   73.89   11.20
  -1   2   8   75.99   12.10
  -1   2   8   84.59   10.90
  -1   2   8   68.79   10.30
   0  -2  -8   10.50    6.80
   0  -2  -8    6.50    5.60
   0  -2  -8    5.80    5.10
   0  -2  -8   -5.10    5.90
   0  -2  -8    9.50    4.30
   0   2   8    4.50    7.20
   0   2   8    1.50    4.70
   0   2   8    4.90    4.20
   0   2   8   -3.70    5.40
   0   2   8    2.60    4.00
   0   2   8    3.30    8.20
  -1  -2  -8  478.65   27.10
  -1  -2  -8  483.35   27.30
  -1  -2  -8  471.55   26.20
  -1  -2  -8  457.55   27.50
   1   2   8  478.25   25.40
   1   2   8  544.85   27.60
   1   2   8  543.25   29.70
   1   2   8  540.35   26.40
   1   2   8  558.74   28.00
   1   2   8  540.45   25.80
  -2  -2  -8  324.17   20.00
  -2  -2  -8  352.16   21.50
  -2  -2  -8  354.76   21.30
  -2  -2  -8  325.47   20.00
  -2  -2  -8  342.47   21.90
   2   2   8  364.16   22.20
   2   2   8  387.06   20.50
   2   2   8  390.56   22.00
   2   2   8  385.26   22.70
  -3  -2  -8  685.73   35.20
  -3  -2  -8  738.03   38.70
  -3  -2  -8  723.43   35.00
   3   2   8  673.43   35.50
   3   2   8  648.04   36.30
  -4  -2  -8 1897.81   87.89
  -4  -2  -8 1901.01   90.89
  -4  -2  -8 1876.71   85.19
  -4  -2  -8 1800.12   84.99
   4   2   8 1941.61   87.59
   4   2   8 1881.01   87.49
   4   2   8 1883.31   89.29
   4   2   8 1935.11   89.79
  -5  -2  -8  426.86   30.90
  -5  -2  -8  402.06   24.90
  -5  -2  -8  379.36   25.00
  -5  -2  -8  398.26   28.30
  -5  -2  -8  390.56   34.30
   5   2   8  367.96   26.50
   5   2   8  419.56   30.30
   5   2   8  350.76   30.10
   5   2   8  382.26   29.90
  -6  -2  -8   96.29   13.60
  -6  -2  -8   85.59   15.50
  -6  -2  -8   52.79   15.70
  -6  -2  -8   76.59   14.50
  -6  -2  -8   82.69   14.20
   6   2   8   78.79   13.40
   6   2   8   66.29   12.40
   6   2   8   48.10   10.70
  -7  -2  -8  108.49   18.70
  -7  -2  -8  114.99   13.20
  -7  -2  -8  104.69   15.30
   7   2   8  115.89   13.60
   7   2   8  104.09   16.30
   4  -3  -8   58.19   11.90
   4  -3  -8   47.60   11.90
   4  -3  -8   42.50    9.10
  -4   3   8   38.30   10.90
  -4   3   8   44.30    8.20
  -4   3   8   12.30   11.00
  -4   3   8   37.50    9.60
   3  -3  -8  541.05   34.50
   3  -3  -8  497.15   35.70
   3  -3  -8  551.34   35.40
  -3   3   8  533.95   33.90
  -3   3   8  537.05   34.30
  -3   3   8  528.75   45.60
  -3   3   8  532.65   31.90
  -3   3   8  528.75   30.20
   2  -3  -8   23.90   16.90
   2  -3  -8    8.30   11.00
   2  -3  -8    6.60   11.40
   2  -3  -8   -9.10   16.40
   2  -3  -8  -12.60   13.50
   2  -3  -8   23.80   16.90
  -2   3   8   -1.50   10.00
  -2   3   8   -5.60    6.60
  -2   3   8    1.80   10.20
  -2   3   8   12.40   11.10
  -2   3   8   12.80    8.90
  -2   3   8   10.20    7.40
   1  -3  -8   13.50    8.80
   1  -3  -8   12.40   13.90
   1  -3  -8    4.80    7.40
   1  -3  -8    1.80   13.30
   1  -3  -8    6.40    9.40
  -1   3   8    1.20    6.60
  -1   3   8    4.80   11.60
  -1   3   8    9.10    6.80
  -1   3   8   14.90    7.30
  -1   3   8    0.50    6.70
  -1   3   8    2.90    5.90
   0  -3  -8  131.99   12.80
   0  -3  -8  145.79   14.50
   0  -3  -8  129.39   12.50
   0  -3  -8  160.18   15.90
   0  -3  -8  163.78   16.90
   0  -3  -8  139.39   18.40
   0   3   8  114.59   21.80
   0   3   8  124.59   12.80
   0   3   8  134.99   13.70
   0   3   8  109.59   12.80
   0   3   8  140.39   13.40
   0   3   8  125.89   13.30
  -1  -3  -8  835.62   43.20
  -1  -3  -8  884.71   43.60
  -1  -3  -8  958.20   45.80
  -1  -3  -8  919.71   44.20
  -1  -3  -8  976.90   46.80
   1   3   8  888.01   48.50
   1   3   8  871.21   43.60
   1   3   8  913.71   45.30
   1   3   8  852.21   43.30
   1   3   8  948.31   45.20
  -2  -3  -8   64.89   11.30
  -2  -3  -8   66.09   10.80
  -2  -3  -8   61.19   10.60
  -2  -3  -8   56.49   11.20
   2   3   8   94.09   11.30
   2   3   8   78.19   10.30
   2   3   8   83.59   11.80
   2   3   8   97.19   14.50
   2   3   8   98.89   12.70
  -3  -3  -8  384.66   23.80
  -3  -3  -8  409.16   26.80
  -3  -3  -8  428.96   25.00
  -3  -3  -8  422.76   24.00
   3   3   8  341.17   24.80
   3   3   8  387.36   27.10
   3   3   8  424.26   24.80
  -4  -3  -8 1261.27   58.89
  -4  -3  -8 1249.07   62.49
  -4  -3  -8 1219.48   63.99
  -4  -3  -8 1210.48   60.69
  -4  -3  -8 1154.18   61.99
  -4  -3  -8 1209.08   58.79
   4   3   8 1302.97   61.79
   4   3   8 1240.48   63.29
   4   3   8 1244.08   62.29
   4   3   8 1272.27   62.89
  -5  -3  -8  437.96   26.90
  -5  -3  -8  459.55   32.10
  -5  -3  -8  420.76   32.70
  -5  -3  -8  444.76   29.90
  -5  -3  -8  445.76   26.90
   5   3   8  409.06   32.70
   5   3   8  434.16   30.00
   5   3   8  375.26   31.70
   5   3   8  460.75   32.40
  -6  -3  -8  146.09   21.80
  -6  -3  -8  144.99   16.40
  -6  -3  -8  158.78   21.80
  -6  -3  -8  127.29   21.50
  -6  -3  -8  145.39   15.40
   6   3   8  157.68   20.10
   6   3   8  142.79   17.60
   6   3   8  170.68   20.40
   6   3   8  135.59   20.80
  -7  -3  -8  224.18   19.20
  -7  -3  -8  239.98   19.60
  -7  -3  -8  216.08   27.90
  -7  -3  -8  247.78   17.50
   7   3   8  214.58   20.70
   7   3   8  218.68   18.60
   4  -4  -8   66.69   11.70
   4  -4  -8   74.39   11.00
  -4   4   8   65.59    9.70
  -4   4   8   88.69   11.20
   3  -4  -8   53.29   10.60
   3  -4  -8   80.09   13.90
   3  -4  -8   59.69   13.10
  -3   4   8   85.99   15.30
  -3   4   8   54.49   10.90
  -3   4   8   39.40   10.90
   2  -4  -8    0.60   15.60
   2  -4  -8    6.90   17.50
   2  -4  -8   13.50   10.10
   2  -4  -8   20.00    9.70
  -2   4   8   15.70    7.40
  -2   4   8   12.10    8.80
  -2   4   8    3.00   16.20
  -2   4   8   -5.60   11.70
  -2   4   8   22.80   10.60
  -2   4   8   10.40   10.60
   1  -4  -8  127.69   19.60
   1  -4  -8   97.99   23.00
   1  -4  -8  159.38   22.20
   1  -4  -8  167.68   22.30
  -1   4   8  119.69   19.30
  -1   4   8  138.09   14.70
  -1   4   8  134.29   15.20
  -1   4   8  120.29   19.10
  -1   4   8  125.99   19.10
  -1   4   8  128.99   17.10
   0  -4  -8   87.29   14.50
   0  -4  -8   75.29   15.00
   0  -4  -8   71.19   14.00
   0  -4  -8   92.79   16.80
   0   4   8   49.40   12.60
   0   4   8   78.69   13.90
   0   4   8   79.09   11.50
   0   4   8   93.59   14.60
   0   4   8   79.49   12.50
   0   4   8   81.89   12.70
  -1  -4  -8  262.97   34.70
  -1  -4  -8  265.27   26.20
  -1  -4  -8  313.87   23.50
  -1  -4  -8  312.57   24.00
  -1  -4  -8  333.37   23.80
   1   4   8  306.37   25.90
   1   4   8  339.37   23.10
   1   4   8  326.17   20.70
   1   4   8  304.57   32.40
   1   4   8  321.17   22.60
   1   4   8  296.67   21.10
   1   4   8  347.97   22.30
  -2  -4  -8   99.69   15.00
  -2  -4  -8   97.49   13.40
  -2  -4  -8  120.89   14.80
  -2  -4  -8  113.49   15.30
  -2  -4  -8  104.49   15.10
   2   4   8  133.09   14.60
   2   4   8  128.79   14.20
   2   4   8  119.19   20.50
   2   4   8  134.69   15.60
   2   4   8  131.49   14.80
   2   4   8  126.09   18.30
   2   4   8  112.99   15.90
  -3  -4  -8 1219.28   62.09
  -3  -4  -8 1219.48   60.59
  -3  -4  -8 1283.67   63.49
  -3  -4  -8 1187.78   59.49
  -3  -4  -8 1221.58   62.49
   3   4   8 1285.57   65.29
   3   4   8 1372.96   62.49
   3   4   8 1332.47   66.59
   3   4   8 1251.77   61.19
   3   4   8 1232.28   62.89
   3   4   8 1282.67   63.29
  -4  -4  -8   48.90   10.10
  -4  -4  -8   47.70   15.50
  -4  -4  -8   32.10   11.70
  -4  -4  -8   50.19    9.90
  -4  -4  -8   45.50    9.20
  -4  -4  -8   46.60   11.40
   4   4   8   39.90   14.00
   4   4   8   36.60   12.20
   4   4   8   56.39   13.20
  -5  -4  -8   19.90   11.30
  -5  -4  -8    5.80    9.00
  -5  -4  -8    8.50    8.20
  -5  -4  -8    9.90    8.50
  -5  -4  -8    9.90    7.20
   5   4   8   26.90   15.50
   5   4   8   13.30   12.50
   5   4   8   17.70   10.40
  -6  -4  -8  620.94   38.70
  -6  -4  -8  600.64   33.00
  -6  -4  -8  603.94   36.20
  -6  -4  -8  549.45   37.70
  -6  -4  -8  623.24   34.60
   6   4   8  553.04   34.70
   6   4   8  607.14   37.30
   6   4   8  558.54   35.80
  -7  -4  -8  182.88   17.40
  -7  -4  -8  181.18   19.10
  -7  -4  -8  206.68   16.10
  -7  -4  -8  176.68   22.50
   7   4   8  156.98   25.40
   7   4   8  206.98   18.10
   7   4   8  209.18   15.60
   3  -5  -8   10.70    6.30
   3  -5  -8    8.30    6.80
  -3   5   8    6.70    6.50
  -3   5   8   16.60    7.70
   2  -5  -8   25.80   10.20
   2  -5  -8   29.00   17.40
   2  -5  -8    5.90    7.90
  -2   5   8   28.70   10.20
  -2   5   8   17.10    7.30
  -2   5   8   23.00   13.20
  -2   5   8   25.80   10.50
   1  -5  -8  102.89   18.00
   1  -5  -8  109.89   17.70
  -1   5   8   76.69   12.50
  -1   5   8   73.79   17.80
  -1   5   8   91.89   16.30
  -1   5   8   83.49   14.00
  -1   5   8  110.09   13.60
  -1   5   8   71.09   19.90
   0  -5  -8  301.57   27.70
   0  -5  -8  272.67   31.90
   0   5   8  298.17   23.10
   0   5   8  306.77   25.70
   0   5   8  311.87   21.60
   0   5   8  298.87   26.70
   0   5   8  363.26   26.70
   0   5   8  283.57   27.20
  -1  -5  -8   65.09   14.90
  -1  -5  -8   50.29   14.30
   1   5   8  108.29   13.80
   1   5   8   83.89   14.70
   1   5   8  106.59   17.80
   1   5   8   94.59   13.40
   1   5   8  114.69   17.30
   1   5   8   90.49   15.30
   1   5   8   90.39   23.00
   1   5   8   83.49   14.90
  -2  -5  -8  541.55   35.00
  -2  -5  -8  611.14   40.80
   2   5   8  569.74   35.10
   2   5   8  586.04   35.30
   2   5   8  576.64   36.20
   2   5   8  573.44   33.20
   2   5   8  560.34   35.90
   2   5   8  545.45   31.50
   2   5   8  555.44   33.60
   2   5   8  560.94   42.90
  -3  -5  -8  593.94   35.50
  -3  -5  -8  571.44   32.80
  -3  -5  -8  565.54   31.50
  -3  -5  -8  484.65   40.50
  -3  -5  -8  601.34   35.50
  -3  -5  -8  514.55   36.70
  -3  -5  -8  534.25   34.00
   3   5   8  484.95   35.10
   3   5   8  550.24   34.90
   3   5   8  537.65   47.30
   3   5   8  526.45   38.90
   3   5   8  538.15   34.90
   3   5   8  514.15   35.00
  -4  -5  -8  112.49   23.10
  -4  -5  -8  181.68   17.70
  -4  -5  -8  149.88   19.80
  -4  -5  -8  190.48   19.30
  -4  -5  -8  176.98   20.10
  -4  -5  -8  178.98   20.60
   4   5   8  159.28   23.60
   4   5   8  149.88   23.60
   4   5   8  172.18   22.80
   4   5   8  121.19   23.90
  -5  -5  -8  187.48   30.00
  -5  -5  -8  244.78   23.60
  -5  -5  -8  266.77   23.50
  -5  -5  -8  210.68   21.90
  -5  -5  -8  235.68   19.70
  -5  -5  -8  239.28   22.20
   5   5   8  197.38   36.20
   5   5   8  214.38   23.80
   5   5   8  226.28   28.80
   5   5   8  238.48   24.90
  -6  -5  -8  167.38   24.10
  -6  -5  -8  240.68   23.40
  -6  -5  -8  228.38   17.50
  -6  -5  -8  210.58   22.10
  -6  -5  -8  202.28   19.80
   6   5   8  163.08   19.30
   6   5   8  198.38   25.60
  -7  -5  -8   26.90    8.40
  -7  -5  -8   45.90   13.10
  -7  -5  -8   33.00    8.20
   7   5   8   50.89    8.50
   7   5   8   43.80    8.40
   2  -6  -8   56.89   10.60
   2  -6  -8   78.69   12.20
  -2   6   8   61.99    8.90
  -2   6   8   48.20    9.70
   1  -6  -8  333.87   23.60
   1  -6  -8  308.77   24.90
  -1   6   8  390.06   25.80
  -1   6   8  337.17   29.20
  -1   6   8  309.27   24.90
  -1   6   8  345.07   22.40
   0  -6  -8  196.88   21.10
   0  -6  -8  207.88   20.70
   0   6   8  200.48   21.80
   0   6   8  166.68   28.10
   0   6   8  157.08   19.70
   0   6   8  176.08   24.00
   0   6   8  166.48   16.50
  -1  -6  -8  167.78   21.60
  -1  -6  -8  187.08   21.70
   1   6   8  176.48   16.50
   1   6   8   90.79   26.80
   1   6   8  149.59   23.50
   1   6   8  142.29   19.50
   1   6   8  159.88   20.40
   1   6   8  170.38   26.40
   1   6   8  160.88   26.60
   1   6   8  136.99   21.90
  -2  -6  -8   75.59   16.00
  -2  -6  -8   66.69   15.50
  -2  -6  -8   44.60   13.50
   2   6   8   96.49   19.00
   2   6   8  104.69   18.50
   2   6   8   73.89   13.70
   2   6   8   88.59   14.80
   2   6   8   61.09   15.10
   2   6   8   74.79   14.00
   2   6   8   66.09   11.30
   2   6   8   68.09   20.80
  -3  -6  -8  623.74   40.60
  -3  -6  -8  619.34   36.70
   3   6   8  648.64   37.50
   3   6   8  596.04   44.40
   3   6   8  551.04   40.10
   3   6   8  537.35   42.00
   3   6   8  598.44   40.40
  -4  -6  -8  200.88   27.70
  -4  -6  -8  214.58   23.40
  -4  -6  -8  240.48   24.80
  -4  -6  -8  188.48   20.40
   4   6   8  163.78   21.30
   4   6   8  126.89   22.40
   4   6   8  140.69   21.80
   4   6   8  192.08   26.40
  -5  -6  -8  142.69   22.70
  -5  -6  -8  147.39   18.40
  -5  -6  -8  128.19   20.70
  -5  -6  -8  146.39   22.80
   5   6   8  167.88   20.90
   5   6   8  160.38   22.40
   5   6   8  180.08   22.20
  -6  -6  -8  239.38   19.50
  -6  -6  -8  211.58   26.50
  -6  -6  -8  216.58   34.60
  -6  -6  -8  218.48   24.40
   6   6   8  245.18   21.00
  -7  -6  -8   77.59   11.00
   7   6   8   60.89   10.70
   7   6   8   48.60    8.70
   1  -7  -8  492.05   28.10
  -1   7   8  503.75   26.80
  -1   7   8  518.45   28.10
   0  -7  -8  139.19   14.50
   0  -7  -8  128.89   15.60
   0  -7  -8  129.69   16.30
   0   7   8  125.79   15.00
   0   7   8  170.78   17.50
  -1  -7  -8  257.97   21.10
  -1  -7  -8  222.98   22.00
   1   7   8  204.68   32.80
   1   7   8  237.38   18.90
   1   7   8  197.38   24.10
   1   7   8  200.08   35.30
   1   7   8  240.98   21.60
  -2  -7  -8   50.09   11.80
  -2  -7  -8   38.30   13.60
   2   7   8   36.70   15.10
   2   7   8   45.60   22.50
   2   7   8   58.59   11.60
   2   7   8   28.60    9.60
   2   7   8   43.20   17.90
  -3  -7  -8  138.29   21.20
  -3  -7  -8  122.79   19.90
   3   7   8  105.09   20.00
   3   7   8  132.99   18.10
   3   7   8  124.39   22.30
  -4  -7  -8  253.17   26.20
  -4  -7  -8  262.27   22.90
   4   7   8  297.47   40.90
   4   7   8  301.07   28.70
   4   7   8  258.97   22.70
  -5  -7  -8  245.58   20.10
  -5  -7  -8  241.58   25.90
  -5  -7  -8  229.38   31.60
   5   7   8  225.48   20.60
   5   7   8  274.67   24.10
  -6  -7  -8  357.36   22.80
  -6  -7  -8  388.86   30.20
  -6  -7  -8  320.77   30.60
   6   7   8  374.56   24.70
  -1  -8  -8  401.56   22.10
  -1  -8  -8  407.16   22.40
  -1  -8  -8  351.86   23.10
   1   8   8  409.46   24.20
  -2  -8  -8   13.90    7.10
   2   8   8    7.60    6.90
   2   8   8   10.80    9.80
  -3  -8  -8   33.10    8.70
   3   8   8   40.70    8.50
   3   8   8   23.50   20.00
  -4  -8  -8  809.72   43.30
   4   8   8  803.92   46.70
  -5  -8  -8  145.49   13.90
  -5  -8  -8  154.58   17.00
   5   8   8  149.99   14.70
   5   8   8  147.79   19.70
   5   7  -9   45.00    7.80
  -5  -7   9   42.00    7.50
  -5  -7   9   57.19    8.60
   4   7  -9  300.97   23.10
   4   7  -9  356.36   22.20
   4   7  -9  317.47   20.00
  -4  -7   9  270.47   17.50
  -4  -7   9  297.07   21.10
   3   7  -9  114.69   13.40
   3   7  -9   93.39   15.70
  -3  -7   9  100.49   13.30
  -3  -7   9  127.59   15.20
   2   7  -9   12.40    7.20
   2   7  -9   11.60    8.00
  -2  -7   9   13.20    8.70
  -2  -7   9   22.10    7.60
   1   7  -9  478.75   29.10
   1   7  -9  504.95   29.40
  -1  -7   9  551.04   31.00
  -1  -7   9  544.65   40.20
  -1  -7   9  521.35   33.80
  -1  -7   9  556.14   28.90
   0   7  -9   68.19   12.00
   0  -7   9   77.29   10.10
   0  -7   9   96.59   19.60
   0  -7   9   67.99   10.30
   0  -7   9   63.29   10.50
   5   6  -9   69.89   10.30
   5   6  -9   61.39   10.10
  -5  -6   9   74.89   12.40
  -5  -6   9   50.29    8.90
   4   6  -9   56.49   12.10
   4   6  -9   48.60   10.90
   4   6  -9   49.20    8.90
  -4  -6   9   78.39   13.40
  -4  -6   9   81.89   13.20
   3   6  -9  308.07   26.80
   3   6  -9  289.77   22.50
   3   6  -9  210.58   39.80
   3   6  -9  285.47   20.80
  -3  -6   9  265.07   24.10
  -3  -6   9  287.57   20.80
  -3  -6   9  297.77   21.80
   2   6  -9  192.48   17.90
   2   6  -9  191.88   17.90
   2   6  -9  217.28   28.20
  -2  -6   9  160.88   21.00
  -2  -6   9  213.58   18.70
   1   6  -9  325.07   23.40
   1   6  -9  333.37   22.60
  -1  -6   9  333.27   26.60
  -1  -6   9  315.47   41.90
  -1  -6   9  350.66   23.30
  -1  -6   9  292.47   25.80
   0   6  -9   36.90   11.70
   0   6  -9   28.00    9.60
   0  -6   9   36.20   10.40
   0  -6   9   50.09    9.60
   0  -6   9   33.40   19.10
   0  -6   9   25.60   10.00
   1  -6   9  475.15   32.70
   1  -6   9  491.45   30.10
   1  -6   9  506.65   27.70
   1  -6   9  504.85   31.10
   2  -6   9   80.49   12.10
   2  -6   9   76.39   11.30
   2  -6   9   81.69   11.20
   2  -6   9   86.69   11.80
   6   5  -9   23.70    6.60
   6   5  -9   21.60   13.00
  -6  -5   9   13.80    7.10
  -6  -5   9   18.20    6.70
   5   5  -9  106.19   23.50
   5   5  -9   93.89   12.60
   5   5  -9   94.69   15.30
  -5  -5   9  111.99   15.90
  -5  -5   9   83.79   12.90
   4   5  -9  471.15   39.50
   4   5  -9  483.05   32.00
   4   5  -9  498.55   28.60
   4   5  -9  420.16   29.80
  -4  -5   9  461.55   30.60
  -4  -5   9  479.15   31.40
   3   5  -9  659.23   34.80
   3   5  -9  551.04   38.50
   3   5  -9  614.24   43.60
   3   5  -9  623.54   35.30
   3   5  -9  626.04   44.70
  -3  -5   9  642.34   38.70
  -3  -5   9  538.55   35.30
  -3  -5   9  659.33   36.20
  -3  -5   9  594.04   42.70
   2   5  -9  227.18   17.90
   2   5  -9  157.68   27.70
   2   5  -9  207.88   17.90
   2   5  -9  163.38   24.60
   2   5  -9  164.88   28.60
  -2  -5   9  211.18   22.70
  -2  -5   9  203.08   19.80
  -2  -5   9  183.28   25.60
  -2  -5   9  177.68   19.70
   1   5  -9  254.07   28.10
   1   5  -9  263.07   19.90
   1   5  -9  253.07   18.50
  -1  -5   9  193.98   26.00
  -1  -5   9  237.08   24.70
  -1  -5   9  204.38   19.40
  -1  -5   9  190.58   27.60
  -1  -5   9  163.48   23.60
   0   5  -9    5.90   15.40
   0   5  -9   10.90   11.60
   0   5  -9  -12.00    7.20
   0  -5   9  -14.60   15.70
   0  -5   9   -0.80    9.60
   0  -5   9    8.30   11.60
   0  -5   9   13.00    8.10
   0  -5   9    1.30   10.10
   1  -5   9  231.38   24.70
   1  -5   9  255.67   23.10
   1  -5   9  276.57   23.50
   1  -5   9  247.88   20.80
   2  -5   9   52.79   11.80
   2  -5   9   72.89   10.50
   2  -5   9   85.89   13.10
   2  -5   9   44.90   11.90
   3  -5   9  149.79   15.40
   3  -5   9  146.29   14.60
   3  -5   9  152.78   15.90
   3  -5   9  163.88   16.70
   6   4  -9   75.69   12.70
   6   4  -9   63.69    9.30
  -6  -4   9   54.19   10.10
  -6  -4   9   77.19   11.20
   5   4  -9   35.10   17.00
   5   4  -9   35.30    9.70
  -5  -4   9   15.90    9.90
  -5  -4   9   26.20   10.50
  -5  -4   9   -7.10   11.00
   4   4  -9   59.39    9.90
   4   4  -9   43.30   11.50
   4   4  -9   68.89   18.50
   4   4  -9   37.10   24.70
   4   4  -9   73.19   16.40
   4   4  -9   48.80   11.50
  -4  -4   9   69.89   13.30
  -4  -4   9   51.29   12.90
  -4  -4   9   34.60   16.60
   3   4  -9  339.97   23.10
   3   4  -9  335.47   29.30
   3   4  -9  305.57   27.60
   3   4  -9  318.77   28.60
   3   4  -9  347.17   22.80
  -3  -4   9  291.57   25.30
  -3  -4   9  282.17   26.50
  -3  -4   9  294.67   28.20
   2   4  -9  361.76   27.80
   2   4  -9  350.66   21.70
   2   4  -9  261.27   31.10
   2   4  -9  331.47   29.50
   2   4  -9  343.07   27.70
   2   4  -9  358.56   22.00
  -2  -4   9  288.27   26.50
  -2  -4   9  303.17   26.00
  -2  -4   9  281.17   23.80
  -2  -4   9  289.67   24.60
   1   4  -9  815.52   43.20
   1   4  -9  763.42   44.80
   1   4  -9  689.23   40.40
   1   4  -9  719.43   36.90
  -1  -4   9  680.13   34.50
  -1  -4   9  625.14   37.30
  -1  -4   9  703.23   41.20
  -1  -4   9  691.13   41.80
  -1  -4   9  648.74   41.40
  -1  -4   9  686.63   38.30
  -1  -4   9  672.83   44.80
  -1  -4   9  736.23   46.00
   0   4  -9   66.49   15.80
   0   4  -9   88.49   15.90
   0   4  -9   72.79   11.60
   0  -4   9   97.89   16.00
   0  -4   9   84.59   14.90
   0  -4   9   84.49   15.40
   0  -4   9   89.19   14.70
   0  -4   9   85.39   12.20
   0  -4   9  100.09   19.00
  -1   4  -9  526.75   37.50
  -1   4  -9  433.26   43.20
   1  -4   9  491.65   33.80
   1  -4   9  491.45   33.60
   1  -4   9  500.65   33.70
   1  -4   9  534.25   38.40
   1  -4   9  514.75   37.60
   1  -4   9  514.65   31.10
   1  -4   9  501.05   36.00
   2  -4   9   19.70    9.90
   2  -4   9    6.30   16.60
   2  -4   9   24.20   12.90
   2  -4   9   42.90   21.00
   2  -4   9   29.00   13.90
   2  -4   9   28.80    9.90
   2  -4   9   25.70   12.30
   2  -4   9   38.90   15.30
   2  -4   9    1.10   10.80
   3  -4   9  529.15   34.60
   3  -4   9  553.94   34.50
   3  -4   9  545.75   33.60
   3  -4   9  527.95   33.70
   3  -4   9  547.95   33.50
   3  -4   9  549.95   33.30
   4  -4   9  238.28   18.70
   4  -4   9  222.88   17.60
   4  -4   9  200.08   17.80
   4  -4   9  223.18   18.30
   6   3  -9   62.79   10.70
   6   3  -9   71.29   11.60
  -6  -3   9   58.59    9.20
  -6  -3   9   70.19   13.90
  -6  -3   9   97.89   16.60
   5   3  -9  724.23   46.10
   5   3  -9  684.43   39.80
  -5  -3   9  724.03   39.30
  -5  -3   9  749.03   43.30
   4   3  -9  272.07   26.00
   4   3  -9  326.47   36.30
   4   3  -9  258.47   23.40
   4   3  -9  252.27   22.90
   4   3  -9  223.08   19.50
   4   3  -9  267.87   29.00
  -4  -3   9  218.58   24.50
  -4  -3   9  175.18   27.90
  -4  -3   9  213.88   23.60
   3   3  -9  249.58   25.70
   3   3  -9  246.18   19.40
   3   3  -9  258.67   23.70
   3   3  -9  295.27   24.70
   3   3  -9  277.47   19.80
   3   3  -9  244.08   24.00
  -3  -3   9  174.08   29.50
  -3  -3   9  221.88   24.60
  -3  -3   9  266.87   24.00
   2   3  -9  158.98   17.80
   2   3  -9  154.68   25.80
   2   3  -9  143.49   18.60
   2   3  -9  164.58   18.30
   2   3  -9  178.08   15.40
   2   3  -9  173.88   14.10
  -2  -3   9  116.09   17.30
  -2  -3   9  161.28   20.70
  -2  -3   9  164.38   17.40
   1   3  -9   73.19   12.40
   1   3  -9   59.59    9.70
   1   3  -9   69.49   12.80
   1   3  -9   54.59    9.20
   1   3  -9   54.59   10.70
  -1  -3   9   57.39   11.00
  -1  -3   9   37.90   13.80
   0   3  -9   41.70    7.10
   0   3  -9   40.40   11.10
   0   3  -9   46.60   10.60
   0  -3   9   31.60   10.00
   0  -3   9   46.30   12.80
   0  -3   9   33.80   13.00
   0  -3   9   49.30   10.80
  -1   3  -9   66.99   14.10
  -1   3  -9   39.20   11.30
  -1   3  -9   37.00   12.70
   1  -3   9   41.40   11.20
   1  -3   9   41.50   10.80
   1  -3   9   57.89   15.20
   1  -3   9   60.69   15.10
   1  -3   9   52.99   15.10
   1  -3   9   45.20   12.10
   2  -3   9  460.85   32.30
   2  -3   9  490.55   32.50
   2  -3   9  439.96   35.00
   2  -3   9  472.95   33.00
   2  -3   9  482.35   29.90
   2  -3   9  457.15   34.00
   2  -3   9  437.66   34.10
   2  -3   9  471.35   33.90
   2  -3   9  427.06   32.70
   3  -3   9  240.78   23.60
   3  -3   9  166.98   22.90
   3  -3   9  186.38   22.90
   3  -3   9  219.28   24.50
   3  -3   9  192.78   24.30
   3  -3   9  214.68   22.60
   3  -3   9  172.28   23.80
   3  -3   9  215.18   31.40
   4  -3   9  243.58   21.30
   4  -3   9  246.78   22.60
   4  -3   9  236.48   21.40
   4  -3   9  253.87   21.30
   4  -3   9  233.28   21.60
   5  -3   9   35.10    7.90
   5  -3   9   30.40   12.10
   5  -3   9   35.00    7.90
   6   2  -9   12.20    7.70
  -6  -2   9    2.90   12.50
  -6  -2   9    3.20    6.40
   5   2  -9  468.05   33.70
   5   2  -9  455.85   29.30
  -5  -2   9  388.26   33.60
  -5  -2   9  462.05   34.30
  -5  -2   9  417.26   27.90
   4   2  -9  740.63   46.10
   4   2  -9  718.83   39.50
   4   2  -9  741.23   42.00
   4   2  -9  786.42   49.10
  -4  -2   9  665.83   45.70
  -4  -2   9  726.23   44.80
  -4  -2   9  722.43   40.60
   3   2  -9  629.74   53.89
   3   2  -9  719.73   39.60
   3   2  -9  767.92   42.90
   3   2  -9  769.62   43.00
   3   2  -9  770.92   39.60
   3   2  -9  715.63   44.20
   3   2  -9  742.83   42.20
  -3  -2   9  837.92   44.10
  -3  -2   9  817.02   42.80
  -3  -2   9  881.51   45.80
   2   2  -9  148.69   15.40
   2   2  -9  105.79   14.80
   2   2  -9  135.29   12.60
   2   2  -9  122.69   13.70
   2   2  -9  119.39   15.60
  -2  -2   9  122.59   14.60
   1   2  -9  900.71   44.90
   1   2  -9  872.51   41.30
   1   2  -9  894.41   45.50
   1   2  -9  804.62   41.70
  -1  -2   9  884.81   44.50
   0   2  -9  171.98   12.30
   0   2  -9  177.98   15.60
   0   2  -9  180.88   16.30
   0  -2   9  193.88   16.10
   0  -2   9  192.58   12.00
   0  -2   9  189.78   13.80
  -1   2  -9   22.90    8.40
  -1   2  -9   25.60    6.30
  -1   2  -9   27.60    8.50
   1  -2   9   32.50    8.30
  -2   2  -9 1237.68   61.29
  -2   2  -9 1132.09   59.49
  -2   2  -9 1205.78   62.89
   2  -2   9 1307.97   63.39
   2  -2   9 1309.07   62.99
   2  -2   9 1239.78   62.79
   2  -2   9 1283.17   63.89
   2  -2   9 1247.68   60.09
   2  -2   9 1255.17   59.49
   2  -2   9 1205.28   62.59
  -3   2  -9  473.85   35.50
   3  -2   9  459.25   30.90
   3  -2   9  443.56   33.20
   3  -2   9  473.55   33.60
   3  -2   9  483.75   34.30
   3  -2   9  480.85   33.10
   3  -2   9  427.06   34.90
   3  -2   9  465.95   32.90
   3  -2   9  499.15   33.70
   3  -2   9  476.55   33.80
  -4   2  -9   15.10   11.60
   4  -2   9    0.20   10.70
   4  -2   9   10.90    9.50
   4  -2   9  -14.30   10.90
   4  -2   9   -7.10   10.30
   4  -2   9  -10.60   10.30
   4  -2   9   -4.20   13.30
   5  -2   9   76.09   11.00
   5  -2   9   53.19    9.90
   5  -2   9   84.89   14.80
   6   1  -9  105.19   12.80
   6   1  -9  118.89   13.10
  -6  -1   9   91.59   11.50
  -6  -1   9   95.99   17.00
   5   1  -9  158.58   21.10
   5   1  -9  155.28   20.60
  -5  -1   9  147.29   23.00
  -5  -1   9  151.78   16.50
  -5  -1   9  171.18   27.80
   4   1  -9  832.42   50.79
   4   1  -9  810.02   50.99
   4   1  -9  844.72   46.40
   4   1  -9  771.22   48.80
  -4  -1   9  857.81   45.60
  -4  -1   9  880.81   51.09
  -4  -1   9  886.31   45.60
   3   1  -9  811.02   41.60
   3   1  -9  753.02   45.60
   3   1  -9  784.52   40.30
   3   1  -9  770.12   44.20
   3   1  -9  815.82   43.50
   3   1  -9  752.02   50.89
  -3  -1   9  811.62   43.60
  -3  -1   9  770.02   42.80
  -3  -1   9  802.52   41.30
  -3  -1   9  811.42   46.60
   2   1  -9  125.59   13.80
   2   1  -9  127.99   13.90
   2   1  -9  114.79   15.00
   2   1  -9  146.69   13.00
  -2  -1   9  136.89   12.90
  -2  -1   9  156.58   15.10
  -2  -1   9  132.39   15.40
   1   1  -9  296.07   20.30
   1   1  -9  296.17   17.50
   1   1  -9  278.87   18.80
   1   1  -9  326.57   20.20
  -1  -1   9  307.27   16.70
  -1  -1   9  269.67   19.80
  -1  -1   9  285.97   19.30
   0   1  -9   33.80    6.70
   0   1  -9   45.50    6.50
   0   1  -9   44.00    8.10
   0  -1   9   25.10    9.60
   0  -1   9   32.20    6.00
   0  -1   9   42.90    8.30
   0  -1   9   26.00    9.10
  -1   1  -9 2198.38   97.79
  -1   1  -9 1994.20   93.49
  -1   1  -9 2250.97   97.09
   1  -1   9 2188.68   93.29
   1  -1   9 2215.68   93.19
   1  -1   9 2244.08   98.79
  -2   1  -9 1200.88   56.09
  -2   1  -9 1241.08   62.39
  -2   1  -9 1377.36   60.79
  -2   1  -9 1218.48   58.59
   2  -1   9 1335.67   63.19
   2  -1   9 1318.57   59.29
  -3   1  -9  785.32   44.50
  -3   1  -9  761.12   35.00
   3  -1   9  685.93   41.90
   3  -1   9  688.53   41.80
   3  -1   9  694.63   40.40
   3  -1   9  679.53   42.40
   3  -1   9  744.33   42.10
   3  -1   9  671.63   38.80
   3  -1   9  720.03   43.20
   3  -1   9  751.62   42.70
  -4   1  -9  215.58   18.10
  -4   1  -9  211.28   27.80
  -4   1  -9  223.38   30.40
   4  -1   9  220.48   25.10
   4  -1   9  190.48   24.30
   4  -1   9  223.28   24.10
   4  -1   9  230.38   25.60
   4  -1   9  185.58   22.50
  -5   1  -9  164.48   16.60
  -5   1  -9  135.79   21.00
   5  -1   9  173.38   19.70
   5  -1   9  148.99   18.50
   5  -1   9  172.18   20.20
  -6   1  -9   71.39   11.30
   6  -1   9   69.69   11.00
   6  -1   9   82.09   12.10
   5   0  -9   64.09   11.30
   5   0  -9  103.19   16.10
  -5   0   9   63.59   13.30
  -5   0   9   76.49   11.30
   4   0  -9  121.19   22.40
   4   0  -9  112.09   24.70
   4   0  -9  127.89   22.50
  -4   0   9  165.78   18.00
  -4   0   9  144.69   17.40
  -4   0   9  145.99   19.10
  -4   0   9  129.99   20.80
  -4   0   9  144.69   23.50
   3   0  -9   78.79   14.50
   3   0  -9   68.39   14.00
   3   0  -9   73.59   18.10
   3   0  -9   87.49   16.80
   3   0  -9   75.89   13.40
  -3   0   9   94.99   17.40
  -3   0   9   81.19   17.90
  -3   0   9   78.19   12.70
  -3   0   9   74.99   13.20
  -3   0   9   87.69   14.70
  -3   0   9   83.59   14.40
   2   0  -9   56.59    9.40
   2   0  -9   29.60    9.80
   2   0  -9   41.70    9.10
   2   0  -9   45.00    9.60
  -2   0   9   39.30    7.90
  -2   0   9   51.19    9.70
  -2   0   9   56.19   11.00
  -2   0   9   49.90    9.70
  -2   0   9   52.09   13.40
   1   0  -9  111.09   11.40
   1   0  -9  140.19   13.60
   1   0  -9  143.49   13.60
   1   0  -9  126.39   12.90
  -1   0   9  151.68   12.00
  -1   0   9  155.38   12.80
  -1   0   9  153.98   13.30
  -1   0   9  125.59    9.30
   0   0  -9  652.73   33.00
   0   0  -9  659.43   33.80
   0   0  -9  644.94   31.10
   0   0   9  617.24   32.20
   0   0   9  642.54   32.90
   0   0   9  610.44   33.10
   0   0   9  650.93   31.40
  -1   0  -9 4831.32  205.88
  -1   0  -9 4655.63  202.88
  -1   0  -9 4909.41  205.18
   1   0   9 4794.52  206.38
   1   0   9 4738.73  204.38
   1   0   9 4844.02  204.58
  -2   0  -9  822.62   40.90
  -2   0  -9  870.41   44.10
  -2   0  -9  740.43   39.50
  -2   0  -9  770.62   38.60
   2   0   9  960.50   44.40
   2   0   9  890.01   38.40
  -3   0  -9  458.55   25.20
  -3   0  -9  485.55   31.80
   3   0   9  508.15   33.30
   3   0   9  497.25   34.00
   3   0   9  455.05   30.00
   3   0   9  482.05   33.30
  -4   0  -9   97.19   12.70
  -4   0  -9   79.39   13.20
  -4   0  -9   76.89   19.80
  -4   0  -9   90.99   14.40
   4   0   9   72.59   13.80
   4   0   9   90.19   15.50
   4   0   9   74.19   15.80
   4   0   9   66.19   13.40
   4   0   9  106.89   22.20
  -5   0  -9   33.00    9.20
  -5   0  -9   25.50   10.60
  -5   0  -9   19.70   17.80
  -5   0  -9   16.80   17.50
   5   0   9   18.40    9.10
   5   0   9   21.20   10.70
   5   0   9   30.20   12.20
  -6   0  -9  259.47   19.10
  -6   0  -9  255.07   19.30
   6   0   9  239.18   20.00
   6   0   9  248.98   20.90
   6   0   9  245.88   19.80
   5  -1  -9  147.49   15.50
   5  -1  -9  153.48   16.70
  -5   1   9  121.09   17.30
  -5   1   9  102.39   18.40
  -5   1   9  149.39   14.80
   4  -1  -9  428.96   31.90
   4  -1  -9  425.96   31.70
  -4   1   9  458.85   31.30
  -4   1   9  502.25   30.00
  -4   1   9  479.95   27.80
  -4   1   9  481.35   31.30
  -4   1   9  452.85   42.50
   3  -1  -9  804.32   48.10
   3  -1  -9  887.91   49.99
   3  -1  -9  864.41   47.40
   3  -1  -9  861.21   49.99
   3  -1  -9  792.12   53.59
  -3   1   9  882.41   46.90
  -3   1   9  814.62   54.29
  -3   1   9  854.41   45.80
  -3   1   9  882.21   46.20
  -3   1   9  895.41   44.90
  -3   1   9  869.31   43.10
  -3   1   9  871.41   48.40
   2  -1  -9  514.25   32.60
   2  -1  -9  559.84   40.00
   2  -1  -9  511.75   33.20
   2  -1  -9  529.05   34.10
   2  -1  -9  523.95   30.80
   2  -1  -9  502.45   30.30
   2  -1  -9  557.14   32.60
  -2   1   9  463.95   38.70
  -2   1   9  515.95   29.10
  -2   1   9  565.64   30.80
  -2   1   9  509.85   28.80
  -2   1   9  518.25   32.30
  -2   1   9  502.95   29.90
  -2   1   9  630.44   48.10
  -2   1   9  533.25   31.10
   1  -1  -9  379.36   24.30
   1  -1  -9  378.36   23.40
   1  -1  -9  355.06   21.70
   1  -1  -9  356.06   20.60
   1  -1  -9  380.86   22.10
  -1   1   9  353.26   21.80
  -1   1   9  352.06   26.80
  -1   1   9  329.37   20.70
  -1   1   9  346.27   22.00
  -1   1   9  324.87   23.10
  -1   1   9  344.47   19.60
   0  -1  -9  291.47   16.20
   0  -1  -9  306.07   18.80
   0  -1  -9  313.77   19.50
   0  -1  -9  315.07   20.70
   0  -1  -9  315.37   20.00
   0   1   9  321.97   21.70
   0   1   9  324.77   19.10
   0   1   9  317.67   19.50
   0   1   9  343.87   19.10
   0   1   9  315.97   16.80
  -1  -1  -9  305.17   17.50
  -1  -1  -9  321.17   18.70
  -1  -1  -9  337.57   19.70
   1   1   9  289.07   19.00
   1   1   9  261.17   18.10
   1   1   9  283.27   18.50
   1   1   9  271.57   15.70
   1   1   9  265.57   17.50
  -2  -1  -9  711.43   37.70
  -2  -1  -9  738.33   39.70
  -2  -1  -9  716.13   36.30
   2   1   9  750.22   36.20
   2   1   9  825.92   39.90
   2   1   9  817.82   38.20
  -3  -1  -9  134.99   17.10
  -3  -1  -9  133.89   12.20
  -3  -1  -9  132.39   15.30
   3   1   9  153.78   12.50
  -4  -1  -9   33.40   10.40
  -4  -1  -9   10.10    6.80
  -4  -1  -9    7.20    8.40
  -4  -1  -9   11.30   12.70
   4   1   9   12.30   12.40
   4   1   9    8.90   11.20
   4   1   9    4.00   10.90
   4   1   9    9.20   11.20
  -5  -1  -9  294.07   26.80
  -5  -1  -9  291.37   22.30
  -5  -1  -9  282.77   28.40
  -5  -1  -9  311.97   21.40
   5   1   9  265.57   24.20
   5   1   9  268.07   24.00
   5   1   9  289.07   26.00
  -6  -1  -9  247.48   19.60
  -6  -1  -9  232.28   19.10
  -6  -1  -9  216.18   32.90
   6   1   9  246.28   20.90
   6   1   9  248.78   20.80
   6   1   9  222.68   20.70
   5  -2  -9  319.87   18.60
   5  -2  -9  287.27   20.00
  -5   2   9  298.37   19.30
   4  -2  -9  260.37   22.10
   4  -2  -9  243.58   24.20
  -4   2   9  277.47   25.20
  -4   2   9  269.57   21.10
  -4   2   9  263.87   22.90
  -4   2   9  264.87   19.60
   3  -2  -9  433.46   38.70
   3  -2  -9  391.16   33.30
   3  -2  -9  443.96   37.00
   3  -2  -9  478.15   33.40
   3  -2  -9  419.56   34.00
  -3   2   9  462.85   30.20
  -3   2   9  406.06   33.80
  -3   2   9  449.46   29.60
  -3   2   9  389.86   46.10
  -3   2   9  501.55   35.40
  -3   2   9  468.95   30.40
  -3   2   9  492.65   27.40
   2  -2  -9  396.06   29.00
   2  -2  -9  323.87   34.70
   2  -2  -9  412.76   32.40
   2  -2  -9  411.06   28.10
   2  -2  -9  380.46   31.60
   2  -2  -9  360.56   29.20
  -2   2   9  358.46   27.10
  -2   2   9  330.97   37.50
  -2   2   9  349.47   23.00
  -2   2   9  385.26   25.00
  -2   2   9  362.96   27.00
  -2   2   9  379.06   26.10
  -2   2   9  375.16   25.10
   1  -2  -9  406.76   26.30
   1  -2  -9  380.96   25.10
   1  -2  -9  431.66   28.10
   1  -2  -9  405.26   26.90
   1  -2  -9  384.86   23.20
  -1   2   9  359.46   32.90
  -1   2   9  374.26   23.20
  -1   2   9  401.06   25.20
  -1   2   9  386.36   24.90
  -1   2   9  379.16   23.10
  -1   2   9  388.96   24.20
   0  -2  -9  736.13   36.90
   0  -2  -9  748.53   37.60
   0  -2  -9  762.52   39.10
   0  -2  -9  734.23   39.60
   0  -2  -9  723.73   36.80
   0   2   9  719.53   34.70
   0   2   9  745.23   35.80
   0   2   9  746.73   37.90
   0   2   9  735.73   41.30
   0   2   9  725.83   37.70
   0   2   9  701.73   37.30
  -1  -2  -9   47.70    8.00
  -1  -2  -9   39.80    7.30
  -1  -2  -9   33.70    6.90
   1   2   9   33.70    7.90
   1   2   9   25.90    6.10
   1   2   9   22.20    6.60
   1   2   9   21.10    5.20
   1   2   9   32.70    8.50
  -2  -2  -9  569.54   31.10
  -2  -2  -9  574.34   30.50
  -2  -2  -9  576.54   30.80
  -2  -2  -9  602.64   33.10
  -2  -2  -9  598.34   32.30
   2   2   9  589.94   32.90
   2   2   9  629.64   32.40
   2   2   9  583.24   30.50
   2   2   9  612.34   32.30
  -3  -2  -9   45.50    9.80
  -3  -2  -9   52.69    8.50
  -3  -2  -9   56.89    9.80
  -3  -2  -9   44.20    8.80
   3   2   9   48.30    9.30
   3   2   9   61.39   11.20
  -4  -2  -9  970.70   47.80
  -4  -2  -9  991.40   47.70
  -4  -2  -9 1038.10   51.09
  -4  -2  -9  928.41   53.49
  -4  -2  -9 1004.10   54.89
   4   2   9  958.10   51.19
   4   2   9  946.41   49.99
   4   2   9  936.31   48.80
   4   2   9  911.51   53.09
  -5  -2  -9   49.20   12.70
  -5  -2  -9   33.00   11.00
  -5  -2  -9   59.89   10.90
  -5  -2  -9   48.30   16.80
  -5  -2  -9   55.79    9.90
   5   2   9   18.70   10.90
   5   2   9   37.50   11.60
   5   2   9   15.40   12.20
   5   2   9   27.60   10.20
  -6  -2  -9  120.49   15.20
  -6  -2  -9  130.09   17.40
  -6  -2  -9  126.99   16.10
   6   2   9  140.29   18.50
   6   2   9  137.69   17.50
   6   2   9  135.09   18.80
  -7  -2  -9   10.80   11.80
  -7  -2  -9    7.20    8.90
  -7  -2  -9   20.40    6.90
   7   2   9   22.60    8.90
   7   2   9    6.20    6.00
   4  -3  -9  102.59   13.20
   4  -3  -9   96.59   16.90
   4  -3  -9  106.19   13.80
  -4   3   9  103.39   13.70
  -4   3   9  101.49   14.90
  -4   3   9   88.09   13.00
  -4   3   9   76.39   15.00
   3  -3  -9   10.30    9.50
   3  -3  -9   18.40   13.80
   3  -3  -9    0.80    9.70
  -3   3   9    4.60    8.90
  -3   3   9    3.30   10.20
  -3   3   9   15.50    7.30
  -3   3   9   17.50    9.40
   2  -3  -9   31.80   15.30
   2  -3  -9   21.50   18.30
   2  -3  -9   22.00   12.90
   2  -3  -9   33.50   18.30
   2  -3  -9   33.80   12.50
  -2   3   9   41.00   10.70
  -2   3   9   25.50   10.80
  -2   3   9   44.20   14.80
  -2   3   9   30.50   10.50
  -2   3   9   76.79   25.80
  -2   3   9   29.30   12.90
  -2   3   9   46.10    9.20
   1  -3  -9  382.56   28.00
   1  -3  -9  327.67   28.40
   1  -3  -9  370.56   29.60
   1  -3  -9  372.76   32.70
  -1   3   9  337.17   23.90
  -1   3   9  378.46   25.00
  -1   3   9  355.26   39.70
  -1   3   9  363.66   26.30
  -1   3   9  378.36   25.60
  -1   3   9  391.06   23.20
  -1   3   9  382.16   27.60
   0  -3  -9  816.62   42.60
   0  -3  -9  799.42   41.00
   0  -3  -9  768.52   41.20
   0  -3  -9  848.82   45.60
   0  -3  -9  862.81   44.80
   0   3   9  793.72   41.30
   0   3   9  797.32   50.99
   0   3   9  846.12   43.00
   0   3   9  837.72   43.50
   0   3   9  796.72   40.20
   0   3   9  877.61   42.00
  -1  -3  -9  188.18   16.30
  -1  -3  -9  188.58   16.20
  -1  -3  -9  208.28   18.20
  -1  -3  -9  203.18   17.00
  -1  -3  -9  197.68   17.10
   1   3   9  182.68   18.70
   1   3   9  179.18   17.00
   1   3   9  213.78   21.00
   1   3   9  195.98   19.30
   1   3   9  216.78   17.10
   1   3   9  194.78   16.00
   1   3   9  227.78   16.00
  -2  -3  -9  510.05   30.40
  -2  -3  -9  480.25   28.30
  -2  -3  -9  517.85   29.30
  -2  -3  -9  506.65   28.40
  -2  -3  -9  496.05   30.40
   2   3   9  504.95   29.80
   2   3   9  503.45   32.30
   2   3   9  533.95   28.70
   2   3   9  534.75   29.80
  -3  -3  -9  405.86   23.80
  -3  -3  -9  383.96   24.60
  -3  -3  -9  374.26   23.60
  -3  -3  -9  373.36   27.20
   3   3   9  332.77   29.20
   3   3   9  352.86   23.90
   3   3   9  378.56   27.10
  -4  -3  -9 1051.79   56.59
  -4  -3  -9 1044.70   57.99
  -4  -3  -9 1113.79   52.49
  -4  -3  -9 1132.99   52.59
  -4  -3  -9 1056.79   54.39
   4   3   9  929.01   57.69
   4   3   9 1068.19   56.29
   4   3   9 1115.19   55.39
   4   3   9 1052.09   55.49
   4   3   9 1056.79   56.39
  -5  -3  -9  122.49   15.20
  -5  -3  -9   98.29   15.80
  -5  -3  -9   88.69   16.20
  -5  -3  -9  103.79   14.60
  -5  -3  -9  142.99   20.20
   5   3   9  158.98   19.40
   5   3   9  117.69   20.70
   5   3   9  147.69   23.30
   5   3   9  159.98   21.60
  -6  -3  -9   31.00   14.60
  -6  -3  -9   37.30   12.40
  -6  -3  -9   30.50    8.50
  -6  -3  -9   34.90    9.60
  -6  -3  -9   47.80   14.50
   6   3   9   34.20    9.20
   6   3   9   32.10   10.90
   6   3   9   26.40   10.40
   6   3   9   31.30   11.70
  -7  -3  -9   27.10    6.80
  -7  -3  -9   21.50    9.40
  -7  -3  -9   30.30    9.20
   7   3   9   15.50    7.00
   7   3   9   12.20    9.50
   3  -4  -9   24.20   13.30
   3  -4  -9   13.60    7.50
   3  -4  -9    4.50    9.40
  -3   4   9    3.50   11.00
  -3   4   9   27.50   11.20
  -3   4   9   23.20    8.60
  -3   4   9    7.00    6.60
   2  -4  -9  499.55   33.60
   2  -4  -9  468.55   33.10
  -2   4   9  484.35   31.30
  -2   4   9  538.95   33.40
  -2   4   9  543.65   32.90
  -2   4   9  494.45   29.00
   1  -4  -9   90.89   17.00
   1  -4  -9  120.79   19.90
   1  -4  -9  100.59   16.90
  -1   4   9  126.49   16.30
  -1   4   9  105.09   19.60
  -1   4   9   93.69   16.50
  -1   4   9  112.29   20.20
  -1   4   9  113.69   27.80
  -1   4   9  110.09   14.00
  -1   4   9   95.39   14.90
   0  -4  -9  796.82   45.20
   0  -4  -9  716.53   42.30
   0  -4  -9  806.02   46.80
   0   4   9  777.42   42.00
   0   4   9  744.83   42.00
   0   4   9  760.92   42.80
   0   4   9  734.33   52.49
   0   4   9  727.13   38.90
   0   4   9  764.02   40.40
   0   4   9  779.02   43.70
  -1  -4  -9  162.08   22.10
  -1  -4  -9  145.29   17.50
  -1  -4  -9  139.09   19.00
  -1  -4  -9  144.09   21.60
  -1  -4  -9  164.58   19.30
   1   4   9  182.88   30.10
   1   4   9  137.09   18.50
   1   4   9  153.78   17.70
   1   4   9  158.48   17.00
   1   4   9  149.49   20.70
   1   4   9  161.08   15.50
   1   4   9  152.48   16.90
   1   4   9  149.29   16.30
   1   4   9  126.89   25.10
  -2  -4  -9  122.59   17.10
  -2  -4  -9  137.39   17.10
  -2  -4  -9  125.79   17.60
  -2  -4  -9  112.09   14.90
  -2  -4  -9  118.19   18.30
  -2  -4  -9  135.09   15.60
  -2  -4  -9  143.39   20.40
   2   4   9  151.38   20.20
   2   4   9  130.79   15.20
   2   4   9  134.09   15.60
   2   4   9  144.59   21.60
   2   4   9  142.39   22.50
   2   4   9  120.79   15.90
  -3  -4  -9 1615.84   73.89
  -3  -4  -9 1624.94   74.29
  -3  -4  -9 1605.04   75.39
  -3  -4  -9 1520.75   77.79
  -3  -4  -9 1582.24   76.49
   3   4   9 1644.74   76.59
   3   4   9 1643.44   78.19
   3   4   9 1582.34   81.19
   3   4   9 1521.75   75.89
   3   4   9 1588.84   78.99
  -4  -4  -9  652.63   36.60
  -4  -4  -9  643.74   39.40
  -4  -4  -9  664.23   35.90
  -4  -4  -9  606.44   37.40
  -4  -4  -9  663.33   40.10
  -4  -4  -9  620.64   43.20
   4   4   9  696.13   44.10
   4   4   9  713.33   41.20
   4   4   9  671.33   39.40
  -5  -4  -9  645.14   34.30
  -5  -4  -9  595.74   37.90
  -5  -4  -9  620.04   35.00
  -5  -4  -9  582.24   37.30
  -5  -4  -9  612.04   38.80
   5   4   9  571.44   42.70
   5   4   9  606.04   37.50
   5   4   9  591.74   38.00
  -6  -4  -9   68.89   13.70
  -6  -4  -9   36.80   11.60
  -6  -4  -9   81.99   13.00
  -6  -4  -9   82.09   12.70
  -6  -4  -9   78.29   12.50
   6   4   9   50.29   12.20
   6   4   9   47.70   10.20
   6   4   9   46.20   12.20
  -7  -4  -9   45.30    9.20
  -7  -4  -9   34.40    7.70
  -7  -4  -9   13.90   12.50
  -7  -4  -9   31.70   10.80
   7   4   9   33.40   12.30
   7   4   9   36.30    8.00
   3  -5  -9  105.99   12.80
  -3   5   9   90.99   12.40
  -3   5   9   84.59   12.10
   2  -5  -9  273.87   23.30
   2  -5  -9  299.27   22.50
  -2   5   9  360.56   23.90
  -2   5   9  328.07   21.00
  -2   5   9  318.67   24.90
  -2   5   9  346.77   27.10
   1  -5  -9   16.00    9.30
   1  -5  -9   -3.40    8.30
  -1   5   9    7.50    9.70
  -1   5   9    6.30   10.60
  -1   5   9    0.90    9.80
  -1   5   9   -2.30    6.90
   0  -5  -9  411.36   31.50
   0  -5  -9  392.66   31.80
   0   5   9  415.26   33.00
   0   5   9  389.66   27.80
   0   5   9  429.06   29.20
   0   5   9  311.27   46.80
   0   5   9  440.86   29.60
   0   5   9  353.86   24.70
   0   5   9  356.66   30.10
  -1  -5  -9   34.00   13.30
  -1  -5  -9   23.40   12.30
   1   5   9   34.80   11.80
   1   5   9   32.50   12.90
   1   5   9   26.10   12.30
   1   5   9   34.50   12.40
   1   5   9   32.20   10.50
   1   5   9   25.90   11.10
   1   5   9   22.30    8.80
   1   5   9   25.50   19.40
  -2  -5  -9  268.37   23.50
  -2  -5  -9  248.18   30.70
   2   5   9  288.17   24.40
   2   5   9  238.38   21.20
   2   5   9  166.38   45.90
   2   5   9  247.68   25.50
   2   5   9  247.38   31.50
   2   5   9  285.47   25.30
   2   5   9  263.87   22.70
   2   5   9  266.07   24.70
  -3  -5  -9  679.73   40.00
  -3  -5  -9  615.44   45.60
  -3  -5  -9  629.04   38.90
  -3  -5  -9  681.03   38.20
  -3  -5  -9  701.43   40.00
  -3  -5  -9  671.43   43.90
  -3  -5  -9  689.23   36.30
   3   5   9  636.64   40.20
   3   5   9  634.34   41.40
   3   5   9  645.04   53.29
   3   5   9  601.04   38.70
   3   5   9  661.63   43.30
  -4  -5  -9   59.09   21.50
  -4  -5  -9   47.20   11.80
  -4  -5  -9   34.50   12.30
  -4  -5  -9   50.49   10.20
  -4  -5  -9   17.00   11.70
   4   5   9   33.70   20.50
   4   5   9   68.19   16.60
   4   5   9   46.90   14.40
   4   5   9   60.09   13.60
  -5  -5  -9  225.48   22.60
  -5  -5  -9  170.78   31.00
  -5  -5  -9  249.48   19.40
  -5  -5  -9  240.58   22.40
  -5  -5  -9  212.78   22.90
  -5  -5  -9  228.68   24.10
   5   5   9  227.58   31.80
   5   5   9  204.98   23.50
   5   5   9  206.68   23.00
  -6  -5  -9  165.98   22.70
  -6  -5  -9  199.98   17.50
  -6  -5  -9  195.48   23.60
  -6  -5  -9  172.28   21.20
  -6  -5  -9  196.18   19.40
   6   5   9  210.18   20.00
   6   5   9  223.58   22.80
   6   5   9  176.38   18.50
  -7  -5  -9  100.19   15.60
  -7  -5  -9  103.09   13.00
  -7  -5  -9   96.29   13.50
   7   5   9  111.09   13.60
   7   5   9  109.99   12.10
   2  -6  -9   31.60    6.40
   2  -6  -9   33.60    7.60
  -2   6   9   41.80    8.20
  -2   6   9   42.70    7.80
   1  -6  -9   94.59   14.50
   1  -6  -9   98.79   15.90
  -1   6   9   96.69   15.80
  -1   6   9   97.69   13.10
  -1   6   9   94.59   18.30
  -1   6   9   89.79   14.40
   0  -6  -9   34.20   11.30
   0  -6  -9   25.80   10.00
   0   6   9   73.89   19.50
   0   6   9   37.50   10.60
   0   6   9   38.10   13.60
   0   6   9   48.30   12.80
   0   6   9   42.20    9.10
  -1  -6  -9   33.30   11.30
  -1  -6  -9   66.49   13.30
   1   6   9   30.50   16.60
   1   6   9   48.00   10.60
   1   6   9   53.69   18.60
   1   6   9   61.59   13.30
   1   6   9   30.20   15.80
   1   6   9   20.30   21.10
   1   6   9   65.89   15.10
  -2  -6  -9   79.19   15.20
  -2  -6  -9   88.99   16.70
  -2  -6  -9  121.19   16.20
   2   6   9  119.79   22.00
   2   6   9  124.89   17.70
   2   6   9  108.19   20.40
   2   6   9  103.39   17.40
   2   6   9  127.49   19.20
   2   6   9   86.59   18.70
   2   6   9  115.49   19.20
   3   6   9   98.19   17.30
   3   6   9  152.58   19.70
   3   6   9  141.99   25.90
   3   6   9   94.69   20.00
  -4  -6  -9   59.79   16.70
  -4  -6  -9   61.99   12.60
  -4  -6  -9   67.09   15.30
  -4  -6  -9   81.19   15.30
   4   6   9  126.69   19.40
   4   6   9   71.49   18.60
   4   6   9   78.79   15.10
  -5  -6  -9  167.08   18.90
  -5  -6  -9  179.08   23.90
  -5  -6  -9  172.18   24.10
   5   6   9  155.28   21.10
   5   6   9  151.58   20.40
  -6  -6  -9   69.49   10.80
  -6  -6  -9   49.60   22.10
  -6  -6  -9   61.89   13.60
   6   6   9   47.50    9.80
   6   6   9   34.10   25.90
  -7  -6  -9   56.69    8.30
   7   6   9   62.59   10.50
   7   6   9   40.80    7.80
   0  -7  -9    3.60    6.90
   0  -7  -9    5.40    6.50
   0  -7  -9   -1.40    8.20
   0   7   9    9.50    7.50
   0   7   9    3.90    7.80
  -1  -7  -9  143.39   17.20
  -1  -7  -9  156.78   18.80
   1   7   9  105.49   17.90
   1   7   9  121.99   17.00
   1   7   9  121.99   22.70
   1   7   9  144.99   15.90
  -2  -7  -9   94.29   16.90
  -2  -7  -9   99.29   16.00
   2   7   9   77.69   23.80
   2   7   9  117.89   22.90
   2   7   9   60.59   11.60
  -3  -7  -9   75.89   13.40
[truncated: 179,390 more chars]
