# Supplementary material for: Pseudallenes A and B, new sulfur-containing ovalicin sesquiterpenoid derivatives with antimicrobial activity from the deep-sea cold seep sediment-derived fungus Pseudallescheria boydii CS-793
Source: Beilstein J Org Chem. 2024 Feb 28;20:470–8. doi: 10.3762/bjoc.20.42 (PMC10910587; doi:10.3762/bjoc.20.42)
Supplement: File 2 — X-ray crystallographic files of compounds 1–3. [file Beilstein_J_Org_Chem-20-470-s002.zip › cpd.3.cif]

 
data_t
 
_audit_creation_method            'SHELXL-2018/3'
_shelx_SHELXL_version_number      '2018/3'
_chemical_name_systematic         ?
_chemical_name_common             ?
_chemical_melting_point           ?
_chemical_formula_moiety          'C16 H26 O5 S'
_chemical_formula_sum
 'C16 H26 O5 S' 
_chemical_formula_weight          330.43

loop_
 _atom_type_symbol
 _atom_type_description
 _atom_type_scat_dispersion_real
 _atom_type_scat_dispersion_imag
 _atom_type_scat_source
 'C'  'C'   0.0181   0.0091
 'International Tables Vol C Tables 4.2.6.8 and 6.1.1.4'
 'H'  'H'   0.0000   0.0000
 'International Tables Vol C Tables 4.2.6.8 and 6.1.1.4'
 'O'  'O'   0.0492   0.0322
 'International Tables Vol C Tables 4.2.6.8 and 6.1.1.4'
 'S'  'S'   0.3331   0.5567
 'International Tables Vol C Tables 4.2.6.8 and 6.1.1.4'
 
_space_group_crystal_system       hexagonal
_space_group_IT_number            169
_space_group_name_H-M_alt         'P 61'
_space_group_name_Hall            'P 61'
 
_shelx_space_group_comment
;
The symmetry employed for this shelxl refinement is uniquely defined
by the following loop, which should always be used as a source of
symmetry information in preference to the above space-group names.
They are only intended as comments.
;
 
loop_
 _space_group_symop_operation_xyz
 'x, y, z'
 'x-y, x, z+1/6'
 'y, -x+y, z+5/6'
 '-y, x-y, z+1/3'
 '-x+y, -x, z+2/3'
 '-x, -y, z+1/2'
 
_cell_length_a                    13.99630(10)
_cell_length_b                    13.99630(10)
_cell_length_c                    30.1665(6)
_cell_angle_alpha                 90
_cell_angle_beta                  90
_cell_angle_gamma                 120
_cell_volume                      5117.78(13)
_cell_formula_units_Z             12
_cell_measurement_temperature     173(2)
_cell_measurement_reflns_used     9761
_cell_measurement_theta_min        3.93
_cell_measurement_theta_max       68.13
 
_exptl_crystal_description        block
_exptl_crystal_colour             colourless
_exptl_crystal_density_meas       ?
_exptl_crystal_density_method     ?
_exptl_crystal_density_diffrn     1.287          
_exptl_crystal_F_000              2136
_exptl_transmission_factor_min    ?
_exptl_transmission_factor_max    ?
_exptl_crystal_size_max           0.160
_exptl_crystal_size_mid           0.140
_exptl_crystal_size_min           0.120
_exptl_absorpt_coefficient_mu     1.863
_shelx_estimated_absorpt_T_min    0.755
_shelx_estimated_absorpt_T_max    0.807
_exptl_absorpt_correction_type    multi-scan
_exptl_absorpt_correction_T_min   0.6017
_exptl_absorpt_correction_T_max   0.7531
_exptl_absorpt_process_details    
;
SADABS-2016/2 - Bruker AXS area detector scaling and absorption correction
;
_exptl_absorpt_special_details    ?
_diffrn_ambient_temperature       173(2)
_diffrn_radiation_wavelength      1.54178
_diffrn_radiation_type            CuK\a
_diffrn_source                    ?
_diffrn_measurement_device_type   'Bruker D8 VENTURE'
_diffrn_measurement_method        '\f and \w scans'
_diffrn_detector_area_resol_mean  ?
_diffrn_reflns_number             65189
_diffrn_reflns_av_unetI/netI      0.0267
_diffrn_reflns_av_R_equivalents   0.0627
_diffrn_reflns_limit_h_min        -16
_diffrn_reflns_limit_h_max        16
_diffrn_reflns_limit_k_min        -16
_diffrn_reflns_limit_k_max        16
_diffrn_reflns_limit_l_min        -36
_diffrn_reflns_limit_l_max        36
_diffrn_reflns_theta_min          3.646
_diffrn_reflns_theta_max          68.266
_diffrn_reflns_theta_full         67.679
_diffrn_measured_fraction_theta_max   0.999
_diffrn_measured_fraction_theta_full  0.999
_diffrn_reflns_Laue_measured_fraction_max    0.999
_diffrn_reflns_Laue_measured_fraction_full   0.999
_diffrn_reflns_point_group_measured_fraction_max   0.999
_diffrn_reflns_point_group_measured_fraction_full  0.999
_reflns_number_total              6250
_reflns_number_gt                 5717
_reflns_threshold_expression      'I > 2\s(I)'
_reflns_Friedel_coverage          0.959
_reflns_Friedel_fraction_max      0.998
_reflns_Friedel_fraction_full     0.998
 
_reflns_special_details
;
 Reflections were merged by SHELXL according to the crystal
 class for the calculation of statistics and refinement.
 
 _reflns_Friedel_fraction is defined as the number of unique
 Friedel pairs measured divided by the number that would be
 possible theoretically, ignoring centric projections and
 systematic absences.
;
 
_computing_data_collection        ?
_computing_cell_refinement        ?
_computing_data_reduction         ?
_computing_structure_solution     'SHELXT 2018/2 (Sheldrick, 2018)'
_computing_structure_refinement 'SHELXL-2018/3 (Sheldrick, 2018)'
_computing_molecular_graphics     ?
_computing_publication_material   ?
_refine_special_details           ?
_refine_ls_structure_factor_coef  Fsqd
_refine_ls_matrix_type            full
_refine_ls_weighting_scheme       calc
_refine_ls_weighting_details
'w=1/[\s^2^(Fo^2^)+(0.0597P)^2^+1.0990P] where P=(Fo^2^+2Fc^2^)/3'
_atom_sites_solution_primary      ?
_atom_sites_solution_secondary    ?
_atom_sites_solution_hydrogens    mixed
_refine_ls_hydrogen_treatment     mixed
_refine_ls_extinction_method      none
_refine_ls_extinction_coef        .
_refine_ls_abs_structure_details
;
 Flack x determined using 2621 quotients [(I+)-(I-)]/[(I+)+(I-)]
 (Parsons, Flack and Wagner, Acta Cryst. B69 (2013) 249-259).
;
_refine_ls_abs_structure_Flack    0.024(6)
_chemical_absolute_configuration  ad
_refine_ls_number_reflns          6250
_refine_ls_number_parameters      442
_refine_ls_number_restraints      1
_refine_ls_R_factor_all           0.0361
_refine_ls_R_factor_gt            0.0317
_refine_ls_wR_factor_ref          0.0883
_refine_ls_wR_factor_gt           0.0848
_refine_ls_goodness_of_fit_ref    0.947
_refine_ls_restrained_S_all       0.947
_refine_ls_shift/su_max           0.006
_refine_ls_shift/su_mean          0.000
 
loop_
 _atom_site_label
 _atom_site_type_symbol
 _atom_site_fract_x
 _atom_site_fract_y
 _atom_site_fract_z
 _atom_site_U_iso_or_equiv
 _atom_site_adp_type
 _atom_site_occupancy
 _atom_site_site_symmetry_order  
 _atom_site_calc_flag
 _atom_site_refinement_flags_posn
 _atom_site_refinement_flags_adp
 _atom_site_refinement_flags_occupancy
 _atom_site_disorder_assembly
 _atom_site_disorder_group
S1 S 0.40803(6) -0.07612(7) 0.61868(3) 0.0379(2) Uani 1 1 d . . . . .
S2 S 0.51588(7) -0.07615(7) 0.38106(3) 0.0378(2) Uani 1 1 d . . . . .
O1 O 0.74594(19) 0.31177(17) 0.55786(7) 0.0334(5) Uani 1 1 d . . . . .
O2 O 0.53306(19) 0.1920(2) 0.54159(7) 0.0303(5) Uani 1 1 d . . . . .
O3 O 0.90833(19) 0.2636(2) 0.54416(9) 0.0472(6) Uani 1 1 d . . . . .
O4 O 0.64083(17) 0.07439(18) 0.53502(7) 0.0292(4) Uani 1 1 d . . . . .
O5 O 0.65189(19) 0.07731(18) 0.65410(7) 0.0340(5) Uani 1 1 d . . . . .
H53 H 0.647(4) 0.029(3) 0.6723(15) 0.051 Uiso 1 1 d . U . . .
O6 O 0.56568(19) 0.31184(17) 0.44194(7) 0.0339(5) Uani 1 1 d . . . . .
O7 O 0.3553(2) 0.2637(2) 0.45555(9) 0.0472(6) Uani 1 1 d . . . . .
O8 O 0.42546(19) 0.07732(17) 0.34566(7) 0.0339(5) Uani 1 1 d . . . . .
H8 H 0.385847 0.029848 0.326762 0.051 Uiso 1 1 calc R U . . .
O9 O 0.43367(17) 0.07461(18) 0.46476(7) 0.0296(4) Uani 1 1 d . . . . .
H51 H 0.483(3) 0.127(3) 0.4852(15) 0.044 Uiso 1 1 d . U . . .
O10 O 0.65895(17) 0.19208(18) 0.45816(7) 0.0297(4) Uani 1 1 d . . . . .
H10 H 0.655981 0.250444 0.459846 0.045 Uiso 1 1 calc R U . . .
C1 C 0.8226(3) 0.4216(3) 0.57206(13) 0.0459(8) Uani 1 1 d . . . . .
H20 H 0.814473 0.427965 0.604021 0.069 Uiso 1 1 calc R U . . .
H1 H 0.807868 0.474055 0.556249 0.069 Uiso 1 1 calc R U . . .
H19 H 0.897951 0.437996 0.565644 0.069 Uiso 1 1 calc R U . . .
C2 C 0.7460(2) 0.2280(2) 0.58449(10) 0.0282(6) Uani 1 1 d . . . . .
H21 H 0.752397 0.249658 0.616419 0.034 Uiso 1 1 calc R U . . .
C3 C 0.6369(2) 0.1166(2) 0.57729(9) 0.0254(6) Uani 1 1 d . . . . .
C4 C 0.5318(2) 0.1297(2) 0.58005(10) 0.0276(6) Uani 1 1 d . . . . .
C5 C 0.4260(2) 0.0171(3) 0.57337(11) 0.0307(6) Uani 1 1 d . . . . .
H15 H 0.436168 -0.016057 0.545653 0.037 Uiso 1 1 calc R U . . .
C6 C 0.3206(3) 0.0241(3) 0.56750(12) 0.0383(7) Uani 1 1 d . . . . .
H14 H 0.303340 0.047695 0.595877 0.046 Uiso 1 1 calc R U . . .
H6 H 0.334456 0.081213 0.545039 0.046 Uiso 1 1 calc R U . . .
C7 C 0.2225(3) -0.0831(4) 0.55338(19) 0.0605(12) Uani 1 1 d . . . . .
H7 H 0.230734 -0.146076 0.556808 0.073 Uiso 1 1 calc R U . . .
C8 C 0.1298(3) -0.1028(4) 0.53749(13) 0.0505(9) Uani 1 1 d . . . . .
C10 C 0.8458(3) 0.1210(3) 0.59860(12) 0.0390(8) Uani 1 1 d . . . . .
H3 H 0.868966 0.147318 0.629310 0.047 Uiso 1 1 calc R U . . .
H24 H 0.901894 0.106097 0.585444 0.047 Uiso 1 1 calc R U . . .
C11 C 0.7341(3) 0.0135(3) 0.59968(12) 0.0365(7) Uani 1 1 d . . . . .
H5 H 0.720739 -0.023144 0.570435 0.044 Uiso 1 1 calc R U . . .
H4 H 0.737226 -0.036613 0.622068 0.044 Uiso 1 1 calc R U . . .
C12 C 0.6380(2) 0.0317(2) 0.61063(10) 0.0285(6) Uani 1 1 d . . . . .
C13 C 0.5320(3) -0.0809(3) 0.60771(12) 0.0336(7) Uani 1 1 d . . . . .
H22 H 0.536924 -0.131773 0.629175 0.040 Uiso 1 1 calc R U . . .
H23 H 0.526813 -0.111594 0.577662 0.040 Uiso 1 1 calc R U . . .
C15 C 0.0353(4) -0.2126(5) 0.5253(2) 0.0803(18) Uani 1 1 d . . . . .
H12 H 0.059993 -0.266851 0.524097 0.120 Uiso 1 1 calc R U . . .
H13 H 0.006814 -0.207825 0.496173 0.120 Uiso 1 1 calc R U . . .
H11 H -0.023195 -0.235384 0.547505 0.120 Uiso 1 1 calc R U . . .
C16 C 0.5286(3) 0.1902(3) 0.62173(10) 0.0334(7) Uani 1 1 d . . . . .
H16 H 0.592171 0.265272 0.621795 0.050 Uiso 1 1 calc R U . . .
H17 H 0.531435 0.150619 0.648054 0.050 Uiso 1 1 calc R U . . .
H18 H 0.460320 0.193458 0.622076 0.050 Uiso 1 1 calc R U . . .
C17 C 0.8411(3) 0.2095(3) 0.57229(11) 0.0348(7) Uani 1 1 d . . . . .
C18 C 0.5989(3) 0.4217(3) 0.42749(13) 0.0466(9) Uani 1 1 d . . . . .
H27 H 0.636564 0.435545 0.398843 0.070 Uiso 1 1 calc R U . . .
H48 H 0.649160 0.474831 0.449385 0.070 Uiso 1 1 calc R U . . .
H25 H 0.533664 0.429944 0.424383 0.070 Uiso 1 1 calc R U . . .
H49 H 0.641(3) 0.116(3) 0.5161(15) 0.041(11) Uiso 1 1 d . . . . .
H50 H 0.592(3) 0.249(3) 0.5442(13) 0.039(11) Uiso 1 1 d . . . . .
C19 C 0.4819(2) 0.2281(2) 0.41524(10) 0.0284(6) Uani 1 1 d . . . . .
H28 H 0.497307 0.249893 0.383338 0.034 Uiso 1 1 calc R U . . .
C20 C 0.4800(2) 0.1168(2) 0.42233(9) 0.0251(6) Uani 1 1 d . . . . .
C21 C 0.5978(2) 0.1297(2) 0.41966(10) 0.0277(6) Uani 1 1 d . . . . .
C22 C 0.5909(3) 0.0170(3) 0.42637(11) 0.0306(6) Uani 1 1 d . . . . .
H32 H 0.547714 -0.016181 0.454106 0.037 Uiso 1 1 calc R U . . .
C23 C 0.7033(3) 0.0241(3) 0.43208(12) 0.0381(7) Uani 1 1 d . . . . .
H36 H 0.744001 0.047730 0.403670 0.046 Uiso 1 1 calc R U . . .
H35 H 0.746649 0.081081 0.454549 0.046 Uiso 1 1 calc R U . . .
C24 C 0.6942(3) -0.0835(4) 0.44612(19) 0.0609(12) Uani 1 1 d . . . . .
H37 H 0.623142 -0.146701 0.442537 0.073 Uiso 1 1 calc R U . . .
C25 C 0.7678(4) -0.1027(4) 0.46217(14) 0.0508(9) Uani 1 1 d . . . . .
C9A C 0.0899(7) -0.0139(7) 0.5508(4) 0.063(3) Uani 0.511(12) 1 d . . P A 1
H9AA H 0.086399 0.023878 0.524058 0.094 Uiso 0.511(12) 1 calc R U P A 1
H9AB H 0.142719 0.040384 0.571734 0.094 Uiso 0.511(12) 1 calc R U P A 1
H9AC H 0.016750 -0.053231 0.564632 0.094 Uiso 0.511(12) 1 calc R U P A 1
C26A C 0.8517(9) -0.0207(9) 0.4903(3) 0.068(3) Uani 0.511(12) 1 d . . P A 1
H26A H 0.837138 0.040180 0.494798 0.102 Uiso 0.511(12) 1 calc R U P A 1
H26B H 0.924063 0.007442 0.476238 0.102 Uiso 0.511(12) 1 calc R U P A 1
H26C H 0.851245 -0.053822 0.518961 0.102 Uiso 0.511(12) 1 calc R U P A 1
C9B C 0.1279(7) -0.0201(9) 0.5094(3) 0.064(3) Uani 0.489(12) 1 d . . P A 2
H9BA H 0.085516 -0.055089 0.482518 0.095 Uiso 0.489(12) 1 calc R U P A 2
H9BB H 0.203573 0.035229 0.501316 0.095 Uiso 0.489(12) 1 calc R U P A 2
H9BC H 0.093386 0.015800 0.525405 0.095 Uiso 0.489(12) 1 calc R U P A 2
C26B C 0.8967(7) -0.0136(7) 0.4486(4) 0.061(3) Uani 0.489(12) 1 d . . P A 2
H26D H 0.929184 -0.052332 0.433265 0.091 Uiso 0.489(12) 1 calc R U P A 2
H26E H 0.939232 0.021466 0.475453 0.091 Uiso 0.489(12) 1 calc R U P A 2
H26F H 0.898159 0.042903 0.428949 0.091 Uiso 0.489(12) 1 calc R U P A 2
C27 C 0.3682(3) 0.2095(3) 0.42728(11) 0.0344(7) Uani 1 1 d . . . . .
C28 C 0.2750(3) 0.1209(3) 0.40111(12) 0.0391(8) Uani 1 1 d . . . . .
H29 H 0.278092 0.147082 0.370370 0.047 Uiso 1 1 calc R U . . .
H47 H 0.204099 0.106145 0.414284 0.047 Uiso 1 1 calc R U . . .
C29 C 0.2792(3) 0.0133(3) 0.40015(12) 0.0367(7) Uani 1 1 d . . . . .
H31 H 0.256331 -0.023049 0.429455 0.044 Uiso 1 1 calc R U . . .
H30 H 0.225876 -0.037054 0.377863 0.044 Uiso 1 1 calc R U . . .
C30 C 0.3935(2) 0.0316(2) 0.38906(10) 0.0285(6) Uani 1 1 d . . . . .
C31 C 0.3874(3) -0.0808(3) 0.39196(12) 0.0335(7) Uani 1 1 d . . . . .
H34 H 0.331663 -0.131688 0.370483 0.040 Uiso 1 1 calc R U . . .
H33 H 0.361863 -0.111516 0.421991 0.040 Uiso 1 1 calc R U . . .
C32 C 0.7524(5) -0.2127(5) 0.4741(2) 0.0799(18) Uani 1 1 d . . . . .
H41 H 0.680843 -0.270621 0.463013 0.120 Uiso 1 1 calc R U . . .
H43 H 0.754685 -0.218518 0.506423 0.120 Uiso 1 1 calc R U . . .
H42 H 0.811452 -0.221314 0.460764 0.120 Uiso 1 1 calc R U . . .
C33 C 0.6617(3) 0.1901(3) 0.37805(10) 0.0329(7) Uani 1 1 d . . . . .
H45 H 0.671825 0.264585 0.377586 0.049 Uiso 1 1 calc R U . . .
H44 H 0.620383 0.149559 0.351697 0.049 Uiso 1 1 calc R U . . .
H46 H 0.734011 0.194824 0.378174 0.049 Uiso 1 1 calc R U . . .
 
loop_
 _atom_site_aniso_label
 _atom_site_aniso_U_11
 _atom_site_aniso_U_22
 _atom_site_aniso_U_33
 _atom_site_aniso_U_23
 _atom_site_aniso_U_13
 _atom_site_aniso_U_12
S1 0.0305(4) 0.0358(4) 0.0380(5) 0.0081(3) 0.0042(3) 0.0096(3)
S2 0.0473(5) 0.0358(4) 0.0376(4) -0.0081(3) -0.0041(3) 0.0261(4)
O1 0.0387(12) 0.0277(10) 0.0281(11) 0.0077(9) -0.0031(9) 0.0123(9)
O2 0.0354(11) 0.0368(12) 0.0208(11) 0.0026(9) -0.0022(8) 0.0196(10)
O3 0.0381(12) 0.0590(16) 0.0420(15) 0.0227(12) 0.0117(11) 0.0224(11)
O4 0.0343(11) 0.0373(12) 0.0189(11) -0.0004(9) -0.0004(8) 0.0200(10)
O5 0.0414(12) 0.0331(11) 0.0197(11) 0.0069(9) -0.0040(9) 0.0128(10)
O6 0.0409(12) 0.0272(10) 0.0301(12) -0.0073(9) -0.0105(9) 0.0144(9)
O7 0.0534(14) 0.0575(15) 0.0425(15) -0.0237(12) -0.0109(12) 0.0366(13)
O8 0.0491(13) 0.0330(11) 0.0193(11) -0.0066(8) -0.0107(9) 0.0204(10)
O9 0.0316(10) 0.0374(12) 0.0196(11) 0.0017(8) 0.0007(8) 0.0171(9)
O10 0.0321(10) 0.0364(11) 0.0200(10) -0.0034(8) -0.0049(8) 0.0167(9)
C1 0.052(2) 0.0310(17) 0.042(2) 0.0035(14) -0.0028(16) 0.0114(15)
C2 0.0320(15) 0.0276(14) 0.0201(15) 0.0065(11) -0.0007(11) 0.0113(12)
C3 0.0282(14) 0.0282(14) 0.0176(14) 0.0008(11) -0.0011(11) 0.0125(12)
C4 0.0330(15) 0.0311(14) 0.0186(15) 0.0024(11) 0.0001(11) 0.0160(13)
C5 0.0300(15) 0.0353(16) 0.0254(15) 0.0005(12) 0.0006(12) 0.0153(13)
C6 0.0310(16) 0.0469(19) 0.0373(19) -0.0050(15) -0.0017(13) 0.0198(15)
C7 0.0356(19) 0.054(2) 0.096(4) -0.024(2) -0.012(2) 0.0251(18)
C8 0.0350(18) 0.064(2) 0.038(2) -0.0020(17) -0.0045(15) 0.0144(17)
C10 0.0285(16) 0.0465(18) 0.041(2) 0.0132(15) 0.0003(13) 0.0180(14)
C11 0.0350(17) 0.0359(17) 0.0395(19) 0.0102(13) -0.0022(13) 0.0185(14)
C12 0.0311(15) 0.0276(14) 0.0220(15) 0.0045(11) -0.0032(11) 0.0111(12)
C13 0.0331(16) 0.0282(15) 0.0345(18) 0.0026(12) -0.0031(13) 0.0115(13)
C15 0.035(2) 0.103(4) 0.088(4) -0.055(3) -0.008(2) 0.024(2)
C16 0.0414(17) 0.0360(16) 0.0232(16) -0.0013(12) 0.0008(13) 0.0195(14)
C17 0.0305(16) 0.0377(16) 0.0275(16) 0.0081(13) -0.0038(12) 0.0105(13)
C18 0.061(2) 0.0309(17) 0.044(2) -0.0039(14) -0.0078(17) 0.0204(16)
C19 0.0398(16) 0.0289(14) 0.0182(15) -0.0059(11) -0.0079(11) 0.0185(12)
C20 0.0330(14) 0.0280(14) 0.0160(14) -0.0008(10) -0.0034(11) 0.0165(12)
C21 0.0335(15) 0.0327(15) 0.0164(14) -0.0020(11) -0.0010(11) 0.0162(12)
C22 0.0344(16) 0.0367(16) 0.0249(15) 0.0013(12) 0.0017(12) 0.0209(13)
C23 0.0378(17) 0.0471(19) 0.0370(19) 0.0065(15) 0.0043(14) 0.0271(15)
C24 0.040(2) 0.054(2) 0.096(4) 0.025(2) 0.012(2) 0.0288(19)
C25 0.068(3) 0.066(2) 0.040(2) 0.0011(17) -0.0022(18) 0.050(2)
C9A 0.039(4) 0.055(5) 0.098(8) 0.007(5) -0.010(4) 0.026(4)
C26A 0.086(7) 0.105(8) 0.049(5) -0.001(5) -0.018(5) 0.074(6)
C9B 0.046(5) 0.097(7) 0.043(5) 0.002(5) -0.015(4) 0.032(5)
C26B 0.038(4) 0.052(5) 0.100(8) -0.003(5) -0.012(4) 0.028(4)
C27 0.0452(18) 0.0379(16) 0.0284(16) -0.0072(13) -0.0100(14) 0.0269(15)
C28 0.0395(17) 0.0467(18) 0.041(2) -0.0138(15) -0.0136(14) 0.0293(15)
C29 0.0337(16) 0.0372(17) 0.0396(19) -0.0098(14) -0.0111(13) 0.0181(14)
C30 0.0353(15) 0.0271(14) 0.0232(15) -0.0039(11) -0.0066(12) 0.0156(12)
C31 0.0384(16) 0.0275(15) 0.0355(18) -0.0024(12) -0.0039(13) 0.0171(14)
C32 0.092(4) 0.102(4) 0.086(4) 0.053(3) 0.045(3) 0.078(3)
C33 0.0390(16) 0.0365(16) 0.0212(15) 0.0019(12) 0.0019(12) 0.0174(14)
 
_geom_special_details
;
 All esds (except the esd in the dihedral angle between two l.s. planes)
 are estimated using the full covariance matrix.  The cell esds are taken
 into account individually in the estimation of esds in distances, angles
 and torsion angles; correlations between esds in cell parameters are only
 used when they are defined by crystal symmetry.  An approximate (isotropic)
 treatment of cell esds is used for estimating esds involving l.s. planes.
;
 
loop_
 _geom_bond_atom_site_label_1
 _geom_bond_atom_site_label_2
 _geom_bond_distance
 _geom_bond_site_symmetry_2
 _geom_bond_publ_flag
S1 C13 1.800(3) . ?
S1 C5 1.818(3) . ?
S2 C31 1.797(3) . ?
S2 C22 1.817(3) . ?
O1 C2 1.422(3) . ?
O1 C1 1.431(4) . ?
O2 C4 1.446(3) . ?
O2 H50 0.82(4) . ?
O3 C17 1.211(4) . ?
O4 C3 1.418(3) . ?
O4 H49 0.81(5) . ?
O5 C12 1.428(4) . ?
O5 H53 0.85(5) . ?
O6 C19 1.423(3) . ?
O6 C18 1.434(4) . ?
O7 C27 1.214(4) . ?
O8 C30 1.427(4) . ?
O8 H8 0.8400 . ?
O9 C20 1.423(3) . ?
O9 H51 0.94(4) . ?
O10 C21 1.448(3) . ?
O10 H10 0.8400 . ?
C1 H20 0.9800 . ?
C1 H1 0.9800 . ?
C1 H19 0.9800 . ?
C2 C17 1.522(5) . ?
C2 C3 1.559(4) . ?
C2 H21 1.0000 . ?
C3 C12 1.563(4) . ?
C3 C4 1.574(4) . ?
C4 C16 1.529(4) . ?
C4 C5 1.544(4) . ?
C5 C6 1.537(4) . ?
C5 H15 1.0000 . ?
C6 C7 1.503(5) . ?
C6 H14 0.9900 . ?
C6 H6 0.9900 . ?
C7 C8 1.277(6) . ?
C7 H7 0.9500 . ?
C8 C9B 1.445(10) . ?
C8 C15 1.488(6) . ?
C8 C9A 1.648(10) . ?
C10 C17 1.501(4) . ?
C10 C11 1.535(4) . ?
C10 H3 0.9900 . ?
C10 H24 0.9900 . ?
C11 C12 1.526(4) . ?
C11 H5 0.9900 . ?
C11 H4 0.9900 . ?
C12 C13 1.535(4) . ?
C13 H22 0.9900 . ?
C13 H23 0.9900 . ?
C15 H12 0.9800 . ?
C15 H13 0.9800 . ?
C15 H11 0.9800 . ?
C16 H16 0.9800 . ?
C16 H17 0.9800 . ?
C16 H18 0.9800 . ?
C18 H27 0.9800 . ?
C18 H48 0.9800 . ?
C18 H25 0.9800 . ?
C19 C27 1.522(4) . ?
C19 C20 1.560(4) . ?
C19 H28 1.0000 . ?
C20 C30 1.565(4) . ?
C20 C21 1.569(4) . ?
C21 C33 1.528(4) . ?
C21 C22 1.545(4) . ?
C22 C23 1.535(4) . ?
C22 H32 1.0000 . ?
C23 C24 1.507(5) . ?
C23 H36 0.9900 . ?
C23 H35 0.9900 . ?
C24 C25 1.283(6) . ?
C24 H37 0.9500 . ?
C25 C26A 1.438(11) . ?
C25 C32 1.488(6) . ?
C25 C26B 1.652(10) . ?
C9A H9AA 0.9800 . ?
C9A H9AB 0.9800 . ?
C9A H9AC 0.9800 . ?
C26A H26A 0.9800 . ?
C26A H26B 0.9800 . ?
C26A H26C 0.9800 . ?
C9B H9BA 0.9800 . ?
C9B H9BB 0.9800 . ?
C9B H9BC 0.9800 . ?
C26B H26D 0.9800 . ?
C26B H26E 0.9800 . ?
C26B H26F 0.9800 . ?
C27 C28 1.498(4) . ?
C28 C29 1.537(4) . ?
C28 H29 0.9900 . ?
C28 H47 0.9900 . ?
C29 C30 1.525(4) . ?
C29 H31 0.9900 . ?
C29 H30 0.9900 . ?
C30 C31 1.535(4) . ?
C31 H34 0.9900 . ?
C31 H33 0.9900 . ?
C32 H41 0.9800 . ?
C32 H43 0.9800 . ?
C32 H42 0.9800 . ?
C33 H45 0.9800 . ?
C33 H44 0.9800 . ?
C33 H46 0.9800 . ?
 
loop_
 _geom_angle_atom_site_label_1
 _geom_angle_atom_site_label_2
 _geom_angle_atom_site_label_3
 _geom_angle
 _geom_angle_site_symmetry_1
 _geom_angle_site_symmetry_3
 _geom_angle_publ_flag
C13 S1 C5 95.63(15) . . ?
C31 S2 C22 95.58(15) . . ?
C2 O1 C1 114.0(2) . . ?
C4 O2 H50 103(3) . . ?
C3 O4 H49 109(3) . . ?
C12 O5 H53 108(3) . . ?
C19 O6 C18 113.8(2) . . ?
C30 O8 H8 109.5 . . ?
C20 O9 H51 105(3) . . ?
C21 O10 H10 109.5 . . ?
O1 C1 H20 109.5 . . ?
O1 C1 H1 109.5 . . ?
H20 C1 H1 109.5 . . ?
O1 C1 H19 109.5 . . ?
H20 C1 H19 109.5 . . ?
H1 C1 H19 109.5 . . ?
O1 C2 C17 111.4(2) . . ?
O1 C2 C3 110.0(2) . . ?
C17 C2 C3 107.3(2) . . ?
O1 C2 H21 109.4 . . ?
C17 C2 H21 109.4 . . ?
C3 C2 H21 109.4 . . ?
O4 C3 C2 108.6(2) . . ?
O4 C3 C12 104.2(2) . . ?
C2 C3 C12 107.1(2) . . ?
O4 C3 C4 109.2(2) . . ?
C2 C3 C4 112.4(2) . . ?
C12 C3 C4 114.8(2) . . ?
O2 C4 C16 108.8(2) . . ?
O2 C4 C5 103.1(2) . . ?
C16 C4 C5 113.2(2) . . ?
O2 C4 C3 107.3(2) . . ?
C16 C4 C3 113.3(2) . . ?
C5 C4 C3 110.4(2) . . ?
C6 C5 C4 114.2(3) . . ?
C6 C5 S1 109.9(2) . . ?
C4 C5 S1 110.7(2) . . ?
C6 C5 H15 107.3 . . ?
C4 C5 H15 107.3 . . ?
S1 C5 H15 107.3 . . ?
C7 C6 C5 113.3(3) . . ?
C7 C6 H14 108.9 . . ?
C5 C6 H14 108.9 . . ?
C7 C6 H6 108.9 . . ?
C5 C6 H6 108.9 . . ?
H14 C6 H6 107.7 . . ?
C8 C7 C6 130.1(4) . . ?
C8 C7 H7 114.9 . . ?
C6 C7 H7 114.9 . . ?
C7 C8 C9B 118.1(5) . . ?
C7 C8 C15 126.8(5) . . ?
C9B C8 C15 108.6(5) . . ?
C7 C8 C9A 115.9(5) . . ?
C15 C8 C9A 112.2(4) . . ?
C17 C10 C11 112.1(3) . . ?
C17 C10 H3 109.2 . . ?
C11 C10 H3 109.2 . . ?
C17 C10 H24 109.2 . . ?
C11 C10 H24 109.2 . . ?
H3 C10 H24 107.9 . . ?
C12 C11 C10 113.1(3) . . ?
C12 C11 H5 109.0 . . ?
C10 C11 H5 109.0 . . ?
C12 C11 H4 109.0 . . ?
C10 C11 H4 109.0 . . ?
H5 C11 H4 107.8 . . ?
O5 C12 C11 109.8(2) . . ?
O5 C12 C13 110.9(2) . . ?
C11 C12 C13 107.3(3) . . ?
O5 C12 C3 107.6(2) . . ?
C11 C12 C3 109.4(2) . . ?
C13 C12 C3 111.8(2) . . ?
C12 C13 S1 114.0(2) . . ?
C12 C13 H22 108.8 . . ?
S1 C13 H22 108.8 . . ?
C12 C13 H23 108.8 . . ?
S1 C13 H23 108.8 . . ?
H22 C13 H23 107.7 . . ?
C8 C15 H12 109.5 . . ?
C8 C15 H13 109.5 . . ?
H12 C15 H13 109.5 . . ?
C8 C15 H11 109.5 . . ?
H12 C15 H11 109.5 . . ?
H13 C15 H11 109.5 . . ?
C4 C16 H16 109.5 . . ?
C4 C16 H17 109.5 . . ?
H16 C16 H17 109.5 . . ?
C4 C16 H18 109.5 . . ?
H16 C16 H18 109.5 . . ?
H17 C16 H18 109.5 . . ?
O3 C17 C10 123.0(3) . . ?
O3 C17 C2 122.4(3) . . ?
C10 C17 C2 114.6(3) . . ?
O6 C18 H27 109.5 . . ?
O6 C18 H48 109.5 . . ?
H27 C18 H48 109.5 . . ?
O6 C18 H25 109.5 . . ?
H27 C18 H25 109.5 . . ?
H48 C18 H25 109.5 . . ?
O6 C19 C27 111.5(2) . . ?
O6 C19 C20 109.9(2) . . ?
C27 C19 C20 107.6(2) . . ?
O6 C19 H28 109.3 . . ?
C27 C19 H28 109.3 . . ?
C20 C19 H28 109.3 . . ?
O9 C20 C19 108.3(2) . . ?
O9 C20 C30 104.0(2) . . ?
C19 C20 C30 107.0(2) . . ?
O9 C20 C21 109.2(2) . . ?
C19 C20 C21 112.7(2) . . ?
C30 C20 C21 115.0(2) . . ?
O10 C21 C33 108.6(2) . . ?
O10 C21 C22 103.1(2) . . ?
C33 C21 C22 113.1(2) . . ?
O10 C21 C20 107.4(2) . . ?
C33 C21 C20 113.4(2) . . ?
C22 C21 C20 110.5(2) . . ?
C23 C22 C21 114.2(3) . . ?
C23 C22 S2 109.7(2) . . ?
C21 C22 S2 110.6(2) . . ?
C23 C22 H32 107.4 . . ?
C21 C22 H32 107.4 . . ?
S2 C22 H32 107.4 . . ?
C24 C23 C22 113.2(3) . . ?
C24 C23 H36 108.9 . . ?
C22 C23 H36 108.9 . . ?
C24 C23 H35 108.9 . . ?
C22 C23 H35 108.9 . . ?
H36 C23 H35 107.7 . . ?
C25 C24 C23 129.7(4) . . ?
C25 C24 H37 115.1 . . ?
C23 C24 H37 115.1 . . ?
C24 C25 C26A 118.5(5) . . ?
C24 C25 C32 126.3(5) . . ?
C26A C25 C32 108.7(5) . . ?
C24 C25 C26B 115.9(5) . . ?
C32 C25 C26B 112.3(4) . . ?
C8 C9A H9AA 109.5 . . ?
C8 C9A H9AB 109.5 . . ?
H9AA C9A H9AB 109.5 . . ?
C8 C9A H9AC 109.5 . . ?
H9AA C9A H9AC 109.5 . . ?
H9AB C9A H9AC 109.5 . . ?
C25 C26A H26A 109.5 . . ?
C25 C26A H26B 109.5 . . ?
H26A C26A H26B 109.5 . . ?
C25 C26A H26C 109.5 . . ?
H26A C26A H26C 109.5 . . ?
H26B C26A H26C 109.5 . . ?
C8 C9B H9BA 109.5 . . ?
C8 C9B H9BB 109.5 . . ?
H9BA C9B H9BB 109.5 . . ?
C8 C9B H9BC 109.5 . . ?
H9BA C9B H9BC 109.5 . . ?
H9BB C9B H9BC 109.5 . . ?
C25 C26B H26D 109.5 . . ?
C25 C26B H26E 109.5 . . ?
H26D C26B H26E 109.5 . . ?
C25 C26B H26F 109.5 . . ?
H26D C26B H26F 109.5 . . ?
H26E C26B H26F 109.5 . . ?
O7 C27 C28 123.2(3) . . ?
O7 C27 C19 122.0(3) . . ?
C28 C27 C19 114.8(3) . . ?
C27 C28 C29 112.1(3) . . ?
C27 C28 H29 109.2 . . ?
C29 C28 H29 109.2 . . ?
C27 C28 H47 109.2 . . ?
C29 C28 H47 109.2 . . ?
H29 C28 H47 107.9 . . ?
C30 C29 C28 113.0(3) . . ?
C30 C29 H31 109.0 . . ?
C28 C29 H31 109.0 . . ?
C30 C29 H30 109.0 . . ?
C28 C29 H30 109.0 . . ?
H31 C29 H30 107.8 . . ?
O8 C30 C29 110.1(2) . . ?
O8 C30 C31 110.9(2) . . ?
C29 C30 C31 107.4(3) . . ?
O8 C30 C20 107.3(2) . . ?
C29 C30 C20 109.5(2) . . ?
C31 C30 C20 111.7(2) . . ?
C30 C31 S2 114.2(2) . . ?
C30 C31 H34 108.7 . . ?
S2 C31 H34 108.7 . . ?
C30 C31 H33 108.7 . . ?
S2 C31 H33 108.7 . . ?
H34 C31 H33 107.6 . . ?
C25 C32 H41 109.5 . . ?
C25 C32 H43 109.5 . . ?
H41 C32 H43 109.5 . . ?
C25 C32 H42 109.5 . . ?
H41 C32 H42 109.5 . . ?
H43 C32 H42 109.5 . . ?
C21 C33 H45 109.5 . . ?
C21 C33 H44 109.5 . . ?
H45 C33 H44 109.5 . . ?
C21 C33 H46 109.5 . . ?
H45 C33 H46 109.5 . . ?
H44 C33 H46 109.5 . . ?
 
loop_
 _geom_torsion_atom_site_label_1
 _geom_torsion_atom_site_label_2
 _geom_torsion_atom_site_label_3
 _geom_torsion_atom_site_label_4
 _geom_torsion
 _geom_torsion_site_symmetry_1
 _geom_torsion_site_symmetry_2
 _geom_torsion_site_symmetry_3
 _geom_torsion_site_symmetry_4
 _geom_torsion_publ_flag
C1 O1 C2 C17 -80.3(3) . . . . ?
C1 O1 C2 C3 160.8(3) . . . . ?
O1 C2 C3 O4 73.2(3) . . . . ?
C17 C2 C3 O4 -48.2(3) . . . . ?
O1 C2 C3 C12 -174.9(2) . . . . ?
C17 C2 C3 C12 63.8(3) . . . . ?
O1 C2 C3 C4 -47.8(3) . . . . ?
C17 C2 C3 C4 -169.2(2) . . . . ?
O4 C3 C4 O2 -51.6(3) . . . . ?
C2 C3 C4 O2 69.1(3) . . . . ?
C12 C3 C4 O2 -168.2(2) . . . . ?
O4 C3 C4 C16 -171.7(2) . . . . ?
C2 C3 C4 C16 -51.0(3) . . . . ?
C12 C3 C4 C16 71.8(3) . . . . ?
O4 C3 C4 C5 60.1(3) . . . . ?
C2 C3 C4 C5 -179.2(2) . . . . ?
C12 C3 C4 C5 -56.4(3) . . . . ?
O2 C4 C5 C6 -55.6(3) . . . . ?
C16 C4 C5 C6 61.7(4) . . . . ?
C3 C4 C5 C6 -170.0(3) . . . . ?
O2 C4 C5 S1 179.79(19) . . . . ?
C16 C4 C5 S1 -62.8(3) . . . . ?
C3 C4 C5 S1 65.4(3) . . . . ?
C13 S1 C5 C6 169.9(2) . . . . ?
C13 S1 C5 C4 -63.0(2) . . . . ?
C4 C5 C6 C7 170.2(3) . . . . ?
S1 C5 C6 C7 -64.8(4) . . . . ?
C5 C6 C7 C8 -165.0(5) . . . . ?
C6 C7 C8 C9B 33.4(9) . . . . ?
C6 C7 C8 C15 -178.4(5) . . . . ?
C6 C7 C8 C9A -25.9(9) . . . . ?
C17 C10 C11 C12 -47.3(4) . . . . ?
C10 C11 C12 O5 -62.8(3) . . . . ?
C10 C11 C12 C13 176.6(3) . . . . ?
C10 C11 C12 C3 55.1(3) . . . . ?
O4 C3 C12 O5 171.0(2) . . . . ?
C2 C3 C12 O5 56.0(3) . . . . ?
C4 C3 C12 O5 -69.6(3) . . . . ?
O4 C3 C12 C11 51.7(3) . . . . ?
C2 C3 C12 C11 -63.3(3) . . . . ?
C4 C3 C12 C11 171.1(3) . . . . ?
O4 C3 C12 C13 -67.0(3) . . . . ?
C2 C3 C12 C13 178.0(3) . . . . ?
C4 C3 C12 C13 52.4(3) . . . . ?
O5 C12 C13 S1 61.1(3) . . . . ?
C11 C12 C13 S1 -178.9(2) . . . . ?
C3 C12 C13 S1 -59.0(3) . . . . ?
C5 S1 C13 C12 60.4(3) . . . . ?
C11 C10 C17 O3 -131.5(4) . . . . ?
C11 C10 C17 C2 49.8(4) . . . . ?
O1 C2 C17 O3 2.1(4) . . . . ?
C3 C2 C17 O3 122.6(3) . . . . ?
O1 C2 C17 C10 -179.2(3) . . . . ?
C3 C2 C17 C10 -58.7(3) . . . . ?
C18 O6 C19 C27 -80.4(3) . . . . ?
C18 O6 C19 C20 160.3(3) . . . . ?
O6 C19 C20 O9 73.2(3) . . . . ?
C27 C19 C20 O9 -48.4(3) . . . . ?
O6 C19 C20 C30 -175.1(2) . . . . ?
C27 C19 C20 C30 63.3(3) . . . . ?
O6 C19 C20 C21 -47.7(3) . . . . ?
C27 C19 C20 C21 -169.3(2) . . . . ?
O9 C20 C21 O10 -51.6(3) . . . . ?
C19 C20 C21 O10 68.9(3) . . . . ?
C30 C20 C21 O10 -168.0(2) . . . . ?
O9 C20 C21 C33 -171.6(2) . . . . ?
C19 C20 C21 C33 -51.1(3) . . . . ?
C30 C20 C21 C33 72.0(3) . . . . ?
O9 C20 C21 C22 60.2(3) . . . . ?
C19 C20 C21 C22 -179.4(2) . . . . ?
C30 C20 C21 C22 -56.3(3) . . . . ?
O10 C21 C22 C23 -55.8(3) . . . . ?
C33 C21 C22 C23 61.4(4) . . . . ?
C20 C21 C22 C23 -170.3(3) . . . . ?
O10 C21 C22 S2 179.89(19) . . . . ?
C33 C21 C22 S2 -62.9(3) . . . . ?
C20 C21 C22 S2 65.4(3) . . . . ?
C31 S2 C22 C23 170.2(2) . . . . ?
C31 S2 C22 C21 -63.0(2) . . . . ?
C21 C22 C23 C24 170.4(3) . . . . ?
S2 C22 C23 C24 -64.8(4) . . . . ?
C22 C23 C24 C25 -164.5(5) . . . . ?
C23 C24 C25 C26A 33.4(9) . . . . ?
C23 C24 C25 C32 -178.2(5) . . . . ?
C23 C24 C25 C26B -26.6(9) . . . . ?
O6 C19 C27 O7 2.0(4) . . . . ?
C20 C19 C27 O7 122.5(3) . . . . ?
O6 C19 C27 C28 -179.0(3) . . . . ?
C20 C19 C27 C28 -58.4(3) . . . . ?
O7 C27 C28 C29 -131.2(4) . . . . ?
C19 C27 C28 C29 49.7(4) . . . . ?
C27 C28 C29 C30 -47.4(4) . . . . ?
C28 C29 C30 O8 -62.5(3) . . . . ?
C28 C29 C30 C31 176.7(3) . . . . ?
C28 C29 C30 C20 55.2(3) . . . . ?
O9 C20 C30 O8 170.9(2) . . . . ?
C19 C20 C30 O8 56.4(3) . . . . ?
C21 C20 C30 O8 -69.7(3) . . . . ?
O9 C20 C30 C29 51.4(3) . . . . ?
C19 C20 C30 C29 -63.1(3) . . . . ?
C21 C20 C30 C29 170.8(2) . . . . ?
O9 C20 C30 C31 -67.4(3) . . . . ?
C19 C20 C30 C31 178.1(3) . . . . ?
C21 C20 C30 C31 52.0(3) . . . . ?
O8 C30 C31 S2 61.0(3) . . . . ?
C29 C30 C31 S2 -178.7(2) . . . . ?
C20 C30 C31 S2 -58.7(3) . . . . ?
C22 S2 C31 C30 60.4(3) . . . . ?
 
_refine_diff_density_max    0.175
_refine_diff_density_min   -0.189
_refine_diff_density_rms    0.033

_shelx_res_file
;
TITL t_a.res in P6(1)
    t.res
    created by SHELXL-2018/3 at 16:54:21 on 22-Dec-2022
CELL 1.54178 13.9963 13.9963 30.1665 90.000 90.000 120.000
ZERR 12.00 0.0001 0.0001 0.0006 0.000 0.000 0.000
LATT -1
SYMM x-y, x, z+1/6
SYMM y, -x+y, z+5/6
SYMM -y, x-y, z+1/3
SYMM -x+y, -x, z+2/3
SYMM -x, -y, z+1/2
SFAC C H O S
UNIT 192 312 60 12
LIST 6 ! automatically inserted. Change 6 to 4 for CHECKCIF!!
LIST 6 ! automatically inserted. Change 6 to 4 for CHECKCIF!!
TEMP -100.150
ACTA
SIZE 0.16 0.14 0.12
CONF
L.S. 30
FMAP 2
PLAN -5 0 0.00
omit -1   2  -4
HTAB
BOND $H
CONF
WGHT    0.059700    1.099000
FVAR       0.40707   0.51134
S1    4    0.408030   -0.076115    0.618678    11.00000    0.03052    0.03580 =
         0.03798    0.00810    0.00419    0.00956
S2    4    0.515881   -0.076150    0.381058    11.00000    0.04728    0.03577 =
         0.03758   -0.00815   -0.00411    0.02611
O1    3    0.745944    0.311772    0.557860    11.00000    0.03871    0.02774 =
         0.02806    0.00767   -0.00310    0.01232
O2    3    0.533061    0.191981    0.541587    11.00000    0.03541    0.03679 =
         0.02080    0.00255   -0.00220    0.01961
O3    3    0.908328    0.263590    0.544159    11.00000    0.03812    0.05904 =
         0.04195    0.02273    0.01171    0.02239
O4    3    0.640829    0.074391    0.535023    11.00000    0.03434    0.03733 =
         0.01888   -0.00040   -0.00045    0.02004
O5    3    0.651895    0.077308    0.654096    11.00000    0.04136    0.03307 =
         0.01971    0.00685   -0.00404    0.01278
H53   2    0.647150    0.029214    0.672342    11.00000   -1.50000
O6    3    0.565679    0.311841    0.441939    11.00000    0.04092    0.02723 =
         0.03008   -0.00726   -0.01046    0.01441
O7    3    0.355279    0.263740    0.455551    11.00000    0.05342    0.05745 =
         0.04247   -0.02367   -0.01092    0.03659
O8    3    0.425458    0.077316    0.345665    11.00000    0.04913    0.03297 =
         0.01932   -0.00660   -0.01073    0.02043
AFIX 147
H8    2    0.385847    0.029848    0.326762    11.00000   -1.50000
AFIX   0
O9    3    0.433670    0.074606    0.464761    11.00000    0.03164    0.03739 =
         0.01963    0.00174    0.00071    0.01708
H51   2    0.482506    0.127000    0.485151    11.00000   -1.50000
O10   3    0.658947    0.192076    0.458163    11.00000    0.03207    0.03644 =
         0.01999   -0.00337   -0.00487    0.01667
AFIX 147
H10   2    0.655981    0.250444    0.459846    11.00000   -1.50000
AFIX   0
C1    1    0.822601    0.421604    0.572063    11.00000    0.05241    0.03102 =
         0.04174    0.00354   -0.00278    0.01141
AFIX 137
H20   2    0.814473    0.427965    0.604021    11.00000   -1.50000
H1    2    0.807868    0.474055    0.556249    11.00000   -1.50000
H19   2    0.897951    0.437996    0.565644    11.00000   -1.50000
AFIX   0
C2    1    0.746040    0.228035    0.584495    11.00000    0.03204    0.02760 =
         0.02006    0.00654   -0.00075    0.01132
AFIX  13
H21   2    0.752397    0.249658    0.616419    11.00000   -1.20000
AFIX   0
C3    1    0.636936    0.116603    0.577293    11.00000    0.02824    0.02822 =
         0.01765    0.00084   -0.00109    0.01249
C4    1    0.531791    0.129738    0.580046    11.00000    0.03299    0.03111 =
         0.01864    0.00243    0.00012    0.01604
C5    1    0.426027    0.017076    0.573367    11.00000    0.02999    0.03530 =
         0.02539    0.00053    0.00061    0.01534
AFIX  13
H15   2    0.436168   -0.016057    0.545653    11.00000   -1.20000
AFIX   0
C6    1    0.320638    0.024136    0.567497    11.00000    0.03104    0.04685 =
         0.03735   -0.00495   -0.00169    0.01979
AFIX  23
H14   2    0.303340    0.047695    0.595877    11.00000   -1.20000
H6    2    0.334456    0.081213    0.545039    11.00000   -1.20000
AFIX   0
C7    1    0.222525   -0.083085    0.553379    11.00000    0.03561    0.05357 =
         0.09610   -0.02425   -0.01171    0.02508
AFIX  43
H7    2    0.230734   -0.146076    0.556808    11.00000   -1.20000
AFIX   0
C8    1    0.129811   -0.102780    0.537487    11.00000    0.03504    0.06436 =
         0.03807   -0.00202   -0.00447    0.01438
C10   1    0.845809    0.120956    0.598595    11.00000    0.02847    0.04651 =
         0.04114    0.01318    0.00031    0.01802
AFIX  23
H3    2    0.868966    0.147318    0.629310    11.00000   -1.20000
H24   2    0.901894    0.106097    0.585444    11.00000   -1.20000
AFIX   0
C11   1    0.734140    0.013489    0.599678    11.00000    0.03499    0.03592 =
         0.03954    0.01018   -0.00218    0.01854
AFIX  23
H5    2    0.720739   -0.023144    0.570435    11.00000   -1.20000
H4    2    0.737226   -0.036613    0.622068    11.00000   -1.20000
AFIX   0
C12   1    0.638011    0.031696    0.610633    11.00000    0.03108    0.02760 =
         0.02198    0.00449   -0.00323    0.01105
C13   1    0.531990   -0.080910    0.607708    11.00000    0.03315    0.02815 =
         0.03449    0.00262   -0.00307    0.01149
AFIX  23
H22   2    0.536924   -0.131773    0.629175    11.00000   -1.20000
H23   2    0.526813   -0.111594    0.577662    11.00000   -1.20000
AFIX   0
C15   1    0.035286   -0.212584    0.525273    11.00000    0.03549    0.10337 =
         0.08830   -0.05528   -0.00759    0.02444
AFIX 137
H12   2    0.059993   -0.266851    0.524097    11.00000   -1.50000
H13   2    0.006814   -0.207825    0.496173    11.00000   -1.50000
H11   2   -0.023195   -0.235384    0.547505    11.00000   -1.50000
AFIX   0
C16   1    0.528647    0.190196    0.621733    11.00000    0.04137    0.03600 =
         0.02317   -0.00134    0.00079    0.01950
AFIX 137
H16   2    0.592171    0.265272    0.621795    11.00000   -1.50000
H17   2    0.531435    0.150619    0.648054    11.00000   -1.50000
H18   2    0.460320    0.193458    0.622076    11.00000   -1.50000
AFIX   0
C17   1    0.841085    0.209513    0.572286    11.00000    0.03046    0.03774 =
         0.02752    0.00813   -0.00376    0.01049
C18   1    0.598897    0.421741    0.427494    11.00000    0.06138    0.03089 =
         0.04409   -0.00390   -0.00785    0.02041
AFIX 137
H27   2    0.636564    0.435545    0.398843    11.00000   -1.50000
H48   2    0.649160    0.474831    0.449385    11.00000   -1.50000
H25   2    0.533664    0.429944    0.424383    11.00000   -1.50000
AFIX   0
H49   2    0.641294    0.116163    0.516146    11.00000    0.04142
H50   2    0.591973    0.249398    0.544221    11.00000    0.03917
C19   1    0.481858    0.228082    0.415239    11.00000    0.03984    0.02892 =
         0.01822   -0.00593   -0.00794    0.01846
AFIX  13
H28   2    0.497307    0.249893    0.383338    11.00000   -1.20000
AFIX   0
C20   1    0.479999    0.116781    0.422326    11.00000    0.03298    0.02796 =
         0.01595   -0.00083   -0.00341    0.01653
C21   1    0.597837    0.129703    0.419658    11.00000    0.03347    0.03270 =
         0.01644   -0.00201   -0.00099    0.01615
C22   1    0.590893    0.016962    0.426373    11.00000    0.03439    0.03674 =
         0.02487    0.00131    0.00174    0.02092
AFIX  13
H32   2    0.547714   -0.016181    0.454106    11.00000   -1.20000
AFIX   0
C23   1    0.703287    0.024080    0.432079    11.00000    0.03785    0.04713 =
         0.03701    0.00650    0.00432    0.02709
AFIX  23
H36   2    0.744001    0.047730    0.403670    11.00000   -1.20000
H35   2    0.746649    0.081081    0.454549    11.00000   -1.20000
AFIX   0
C24   1    0.694153   -0.083528    0.446118    11.00000    0.03989    0.05391 =
         0.09622    0.02517    0.01230    0.02884
AFIX  43
H37   2    0.623142   -0.146701    0.442537    11.00000   -1.20000
AFIX   0
C25   1    0.767813   -0.102664    0.462173    11.00000    0.06807    0.06593 =
         0.03998    0.00107   -0.00218    0.04957
part 1
C9A   1    0.089873   -0.013934    0.550830    21.00000    0.03886    0.05529 =
         0.09767    0.00728   -0.00972    0.02619
AFIX 137
H9AA  2    0.086399    0.023878    0.524058    21.00000   -1.50000
H9AB  2    0.142719    0.040384    0.571734    21.00000   -1.50000
H9AC  2    0.016750   -0.053231    0.564632    21.00000   -1.50000
AFIX   0
C26A  1    0.851747   -0.020690    0.490280    21.00000    0.08577    0.10451 =
         0.04928   -0.00062   -0.01822    0.07360
AFIX 137
H26A  2    0.837138    0.040180    0.494798    21.00000   -1.50000
H26B  2    0.924063    0.007442    0.476238    21.00000   -1.50000
H26C  2    0.851245   -0.053822    0.518961    21.00000   -1.50000
AFIX   0
part 2
C9B   1    0.127919   -0.020052    0.509423   -21.00000    0.04605    0.09681 =
         0.04331    0.00205   -0.01549    0.03243
AFIX 137
H9BA  2    0.085516   -0.055089    0.482518   -21.00000   -1.50000
H9BB  2    0.203573    0.035229    0.501316   -21.00000   -1.50000
H9BC  2    0.093386    0.015800    0.525405   -21.00000   -1.50000
AFIX   0
C26B  1    0.896698   -0.013604    0.448578   -21.00000    0.03797    0.05155 =
         0.09983   -0.00264   -0.01170    0.02800
AFIX 137
H26D  2    0.929184   -0.052332    0.433265   -21.00000   -1.50000
H26E  2    0.939232    0.021466    0.475453   -21.00000   -1.50000
H26F  2    0.898159    0.042903    0.428949   -21.00000   -1.50000
AFIX   0
part 0
C27   1    0.368212    0.209484    0.427280    11.00000    0.04517    0.03789 =
         0.02845   -0.00716   -0.01004    0.02689
C28   1    0.274998    0.120926    0.401112    11.00000    0.03953    0.04673 =
         0.04132   -0.01382   -0.01365    0.02931
AFIX  23
H29   2    0.278092    0.147082    0.370370    11.00000   -1.20000
H47   2    0.204099    0.106145    0.414284    11.00000   -1.20000
AFIX   0
C29   1    0.279244    0.013298    0.400148    11.00000    0.03374    0.03719 =
         0.03963   -0.00978   -0.01110    0.01810
AFIX  23
H31   2    0.256331   -0.023049    0.429455    11.00000   -1.20000
H30   2    0.225876   -0.037054    0.377863    11.00000   -1.20000
AFIX   0
C30   1    0.393534    0.031626    0.389057    11.00000    0.03531    0.02706 =
         0.02320   -0.00388   -0.00658    0.01559
C31   1    0.387407   -0.080778    0.391955    11.00000    0.03840    0.02748 =
         0.03546   -0.00242   -0.00392    0.01712
AFIX  23
H34   2    0.331663   -0.131688    0.370483    11.00000   -1.20000
H33   2    0.361863   -0.111516    0.421991    11.00000   -1.20000
AFIX   0
C32   1    0.752381   -0.212669    0.474112    11.00000    0.09186    0.10183 =
         0.08611    0.05278    0.04509    0.07841
AFIX 137
H41   2    0.680843   -0.270621    0.463013    11.00000   -1.50000
H43   2    0.754685   -0.218518    0.506423    11.00000   -1.50000
H42   2    0.811452   -0.221314    0.460764    11.00000   -1.50000
AFIX   0
C33   1    0.661741    0.190079    0.378050    11.00000    0.03901    0.03650 =
         0.02116    0.00188    0.00185    0.01741
AFIX 137
H45   2    0.671825    0.264585    0.377586    11.00000   -1.50000
H44   2    0.620383    0.149559    0.351697    11.00000   -1.50000
H46   2    0.734011    0.194824    0.378174    11.00000   -1.50000
REM #####
AFIX   0
HKLF 4 1 1 0 0 0 1 0 0 0 1


REM  t_a.res in P6(1)
REM wR2 = 0.088315, GooF = S = 0.94710, Restrained GooF = 0.94702 for all data
REM R1 = 0.031717 for 5717 Fo > 4sig(Fo) and 0.036107 for all 6250 data
REM 442 parameters refined using 1 restraints

END

WGHT      0.0429      1.1774

REM Instructions for potential hydrogen bonds
EQIV $1 x-y, x-1, z+1/6
HTAB O5 O3_$1
EQIV $2 y, -x+y, z-1/6
HTAB O8 O7_$2
HTAB O9 O2
HTAB O10 O6
HTAB C1 O3
HTAB C13 O10_$1
HTAB C16 O5
HTAB C18 O7
HTAB O4 O10
HTAB O2 O1
HTAB C31 O2_$2
HTAB C33 O8

REM Highest difference peak  0.175,  deepest hole -0.189,  1-sigma level  0.033
Q1    1   0.4365  0.0745  0.4038  11.00000  0.05    0.18
Q2    1   0.5827 -0.0228  0.6086  11.00000  0.05    0.17
Q3    1   0.5746  0.4321  0.3999  11.00000  0.05    0.17
Q4    1   0.5825  0.1202  0.5795  11.00000  0.05    0.17
Q5    1   0.5322  0.1068  0.4190  11.00000  0.05    0.16
;
_shelx_res_checksum   32676

_shelx_hkl_file
;
  -1   0   0 2949.80  133.79
   1   0   0 3023.90  134.19
   1   0   0 3126.79  133.79
   2   0   0 1577.64   72.59
   2   0   0 1738.13   71.89
   2   0   0 1558.54   72.39
   3   0   0  118.99    6.70
   3   0   0   97.49    6.00
   4   0   0  320.57   15.40
   4   0   0  291.97   15.70
   5   0   0  190.68   10.50
   5   0   0  172.38   11.30
   6   0   0 1485.25   71.59
   6   0   0 1591.44   70.89
  -7   0   0  340.97   18.40
   7   0   0  298.67   20.40
   7   0   0  333.87   18.40
  -8   0   0   59.89    8.00
   8   0   0   51.09    5.90
   8   0   0   56.99    7.70
   8   0   0   28.30   10.70
  -9   0   0    0.40    5.90
  -9   0   0   11.60    8.50
  -9   0   0    8.80    7.70
   9   0   0    9.10    3.70
   9   0   0    4.50    4.40
   9   0   0   -1.70   12.60
   9   0   0   11.20    6.10
 -10   0   0   53.39   10.60
 -10   0   0   46.80    9.30
 -10   0   0   30.80   11.30
 -10   0   0   29.20   12.40
 -10   0   0   30.30    8.80
  10   0   0   39.50    5.80
  10   0   0   62.39   14.20
  10   0   0   32.50    8.80
  10   0   0   50.29    7.60
 -11   0   0    5.00   16.90
 -11   0   0   12.20   11.60
 -11   0   0   10.20    7.50
 -11   0   0   -0.50   12.90
 -11   0   0   12.70    7.30
  11   0   0   16.60    5.70
  11   0   0   23.40   12.10
  11   0   0    4.30   10.20
  11   0   0   20.40    5.00
 -12   0   0  306.37   21.30
 -12   0   0  307.17   20.80
  12   0   0  317.17   17.60
  12   0   0  316.97   25.60
 -13   0   0    1.60   11.30
 -13   0   0    1.00    5.50
  13   0   0   -1.20    8.70
  13   0   0    5.60    4.60
 -14   0   0   24.60    5.60
  14   0   0   26.10    8.30
  14   0   0   33.90    5.40
  15  -1   0   -0.20    4.30
  15  -1   0    2.70    6.90
 -15   1   0    1.20    4.40
  14  -1   0    3.50    7.60
  14  -1   0   -0.10    4.40
 -14   1   0    0.70    4.90
  13  -1   0  101.19   13.60
 -13   1   0   97.19   12.80
 -13   1   0   81.49   12.70
  12  -1   0  155.88   20.00
  12  -1   0  163.08   11.60
 -12   1   0  148.39   15.70
 -12   1   0  156.18   15.00
 -12   1   0  111.99   19.00
  11  -1   0    2.90    4.40
  11  -1   0   -6.90    8.30
  11  -1   0    8.50   10.70
  11  -1   0   -0.60    5.10
 -11   1   0    7.40    8.00
 -11   1   0   -9.40   11.60
 -11   1   0    6.30    9.70
 -11   1   0   -0.90    7.10
  10  -1   0   63.99    8.10
  10  -1   0   60.79   13.50
  10  -1   0   45.60    8.80
  10  -1   0   53.29    7.50
 -10   1   0   63.59   10.60
 -10   1   0   62.09    9.60
 -10   1   0   63.09   10.10
 -10   1   0   57.39    8.90
   9  -1   0  242.08   13.00
   9  -1   0  207.08   13.60
   9  -1   0  204.48   15.30
   9  -1   0  229.48   30.80
  -9   1   0  227.08   18.20
  -9   1   0  217.28   19.10
  -9   1   0  227.28   15.80
   8  -1   0  535.95   30.40
   8  -1   0  557.04   28.50
   7  -1   0  365.26   20.60
   7  -1   0  352.56   19.10
   6  -1   0   11.40    2.70
   6  -1   0    8.00    4.10
   5  -1   0    4.30    1.30
   5  -1   0    4.80    2.90
   5  -1   0    3.90    1.90
   4  -1   0  969.10   44.70
   4  -1   0  986.40   44.40
   4  -1   0  964.00   43.50
   3  -1   0  422.86   19.10
   3  -1   0  420.56   19.60
   2  -1   0 3088.29  133.09
   2  -1   0 2939.11  133.49
   0  -1   0 2929.81  129.49
  -1  -1   0 3015.80  131.59
  -1  -1   0 2936.51  131.79
   1   1   0 2980.80  131.89
   1   1   0 2955.50  131.69
  -2  -1   0  441.36   20.30
   2   1   0  421.16   20.40
   2   1   0  447.06   20.70
  -3  -1   0 1040.10   45.60
   3   1   0  992.70   45.70
   3   1   0  967.70   46.10
  -4  -1   0   -0.20    1.80
   4   1   0    2.30    3.30
   4   1   0    4.80    2.10
  -5  -1   0    8.60    2.90
   5   1   0    7.10    2.70
   5   1   0   10.70    5.30
  -6  -1   0  406.96   20.50
   6   1   0  347.77   22.20
   6   1   0  398.16   20.70
  -7  -1   0  577.64   29.10
   7   1   0  532.65   32.80
   7   1   0  573.24   29.50
   7   1   0  575.34   27.30
  -8  -1   0  208.88   19.20
  -8  -1   0  228.08   18.70
  -8  -1   0  222.48   15.60
  -8  -1   0  215.98   17.10
   8   1   0  229.68   15.80
   8   1   0  223.58   13.80
   8   1   0  224.98   12.80
  -9  -1   0   63.09   11.70
  -9  -1   0   53.49    9.40
  -9  -1   0   37.80    9.60
  -9  -1   0   51.29    9.80
  -9  -1   0   69.39   14.50
   9   1   0   58.39    8.10
   9   1   0   61.79   16.20
   9   1   0   51.49    8.70
   9   1   0   62.69    7.30
 -10  -1   0    8.50    8.00
 -10  -1   0   11.40    7.30
 -10  -1   0    0.50   10.50
 -10  -1   0   10.70   14.50
  10   1   0    1.90    4.40
  10   1   0    3.50    4.30
  10   1   0  -10.90    8.80
  10   1   0  -11.60   12.60
 -11  -1   0  146.59   16.20
 -11  -1   0  153.28   15.70
  11   1   0  143.19   23.00
  11   1   0  167.48   12.50
  11   1   0  155.58   11.40
 -12  -1   0   91.69   11.50
  12   1   0  100.29    9.60
  12   1   0   89.79   10.50
  12   1   0   85.39   13.40
 -13  -1   0    0.70    4.80
  13   1   0    2.00    4.40
  13   1   0    3.30    9.60
 -14  -1   0    1.40    4.00
  14   1   0    5.40    4.00
  14   1   0   15.70    9.40
  15  -2   0    1.30    4.60
  15  -2   0    1.10    6.50
 -15   2   0   -4.10    4.50
  14  -2   0   52.99    9.90
  14  -2   0   49.00    6.80
 -14   2   0   43.10    7.60
 -14   2   0   52.09    8.60
  13  -2   0    3.70    7.00
  13  -2   0   -2.30    8.70
 -13   2   0    5.80    9.80
 -13   2   0   10.20    6.40
 -13   2   0    0.30    6.50
  12  -2   0  166.68   20.70
  12  -2   0  205.18   21.40
  12  -2   0  186.48   13.00
 -12   2   0  214.98   17.10
 -12   2   0  198.78   18.00
 -12   2   0  162.88   26.80
 -12   2   0  191.38   21.80
  11  -2   0    4.40    4.50
  11  -2   0    6.30    8.30
  11  -2   0    1.60   10.10
  11  -2   0    4.60    5.30
 -11   2   0    6.00    9.40
 -11   2   0   16.70    7.90
 -11   2   0    9.20    7.70
 -11   2   0  -10.80    7.40
  10  -2   0   -1.40   13.00
  10  -2   0   13.30   10.40
  10  -2   0   18.20    4.60
  10  -2   0   15.00    6.30
  10  -2   0   14.40    4.50
 -10   2   0   13.30    6.50
 -10   2   0   12.20    7.00
 -10   2   0   13.60    9.10
 -10   2   0    2.90    7.50
   9  -2   0  462.35   28.00
   9  -2   0  474.75   24.00
   9  -2   0  482.65   25.90
  -9   2   0  463.25   27.50
   8  -2   0   45.40    6.30
   8  -2   0   52.69    7.80
   7  -2   0   -0.30    2.50
   7  -2   0    4.70    4.10
   6  -2   0 1816.02   79.99
   6  -2   0 1842.52   81.49
   6  -2   0 1722.03   81.89
   5  -2   0 1274.07   57.09
   5  -2   0 1268.67   56.59
   5  -2   0 1188.88   55.59
   4  -2   0 2253.07  100.99
   4  -2   0 2299.17  101.59
   3  -2   0  437.46   20.80
   3  -2   0  459.05   20.40
   2  -2   0 1670.63   74.39
   1  -2   0 3160.88  139.69
   1  -2   0 3194.18  139.59
  -1   2   0 3105.79  139.79
   0  -2   0 1700.73   74.29
   0  -2   0 1617.34   74.49
   0   2   0 1656.23   74.99
   0   2   0 1706.13   74.59
  -1  -2   0  404.56   19.70
  -1  -2   0  406.66   19.50
   1   2   0  438.96   20.10
   1   2   0  428.56   19.70
  -2  -2   0 2497.95  108.09
  -2  -2   0 2361.96  108.29
   2   2   0 2371.36  108.19
   2   2   0 2454.55  108.69
  -3  -2   0 1345.67   59.79
  -3  -2   0 1310.37   60.19
   3   2   0 1355.86   60.09
   3   2   0 1252.97   60.49
  -4  -2   0 1876.21   84.79
  -4  -2   0 1875.61   84.19
   4   2   0 1951.40   84.69
   4   2   0 1733.23   85.09
  -5  -2   0   -0.40    3.40
  -5  -2   0    7.70    3.20
   5   2   0    1.30    2.80
   5   2   0   11.90    6.40
  -6  -2   0   44.50    6.90
  -6  -2   0   43.50    6.70
   6   2   0   36.40   10.00
   6   2   0   58.09    6.90
   6   2   0   52.09    5.60
  -7  -2   0  504.05   28.90
  -7  -2   0  445.96   26.90
  -7  -2   0  512.65   26.20
   7   2   0  498.25   26.80
   7   2   0  464.05   24.60
   7   2   0  482.65   23.90
  -8  -2   0   31.40    8.70
  -8  -2   0    7.80    7.20
  -8  -2   0   22.60    8.90
  -8  -2   0   16.40    8.40
   8   2   0  -35.40   15.70
   8   2   0   11.60    4.70
   8   2   0   22.00    6.70
   8   2   0    5.50    3.80
  -9  -2   0    8.10    7.40
  -9  -2   0    9.80    8.10
  -9  -2   0    6.90   10.10
  -9  -2   0    0.20   13.40
   9   2   0    7.20    4.50
   9   2   0    9.20   14.80
   9   2   0    4.80    7.80
   9   2   0    8.60    4.00
 -10  -2   0  211.58   17.00
 -10  -2   0  179.78   17.50
  10   2   0  180.48   12.70
  10   2   0  137.29   20.20
  10   2   0  173.28   12.40
  10   2   0  216.68   24.70
 -11  -2   0   -1.60    5.50
 -11  -2   0   -6.80    9.70
  11   2   0    6.70    4.40
  11   2   0    1.00    4.80
  11   2   0    1.80    6.00
  11   2   0   -3.00   11.30
 -12  -2   0   55.79    7.80
  12   2   0   35.50   12.10
  12   2   0   35.80    6.50
  12   2   0   41.80    5.70
 -13  -2   0    2.90    4.30
  13   2   0    1.90    4.10
  13   2   0   -6.40   10.30
  15  -3   0    9.70    6.70
  15  -3   0    1.90    4.40
 -15   3   0    5.60    5.70
 -15   3   0    4.10    6.70
  14  -3   0   21.70    8.50
 -14   3   0   29.30    7.60
 -14   3   0   15.10    6.40
 -14   3   0   12.10    9.90
  13  -3   0   12.40    9.40
 -13   3   0   12.20    7.40
 -13   3   0    3.10    6.80
  12  -3   0   19.40   10.20
  12  -3   0   15.50    5.30
  12  -3   0   21.60    9.90
 -12   3   0   12.30    7.40
 -12   3   0   26.30   10.80
 -12   3   0   16.10    8.40
  11  -3   0   -0.60    4.80
  11  -3   0    2.10    9.70
  11  -3   0    0.40    5.30
  11  -3   0    7.50    7.20
 -11   3   0    6.70    8.30
 -11   3   0    3.60    6.90
 -11   3   0   14.70    7.40
  10  -3   0    5.30    5.40
  10  -3   0    1.40   11.40
  10  -3   0   10.00   10.10
  10  -3   0    1.30    4.30
  10  -3   0    1.80    4.50
 -10   3   0    8.50    7.50
 -10   3   0   -3.60    9.40
 -10   3   0   -0.40    6.80
   9  -3   0   -0.40    4.00
   9  -3   0    2.90    7.50
   8  -3   0  933.31   45.30
   8  -3   0  916.01   44.20
   7  -3   0 1252.87   58.09
   7  -3   0 1301.77   59.59
   7  -3   0 1309.77   60.39
   6  -3   0  571.74   27.70
   6  -3   0  631.74   28.80
   5  -3   0 1306.97   58.39
   5  -3   0 1263.27   57.59
   4  -3   0 1018.70   45.30
   4  -3   0  996.30   45.80
   3  -3   0  101.49    5.80
   2  -3   0  448.46   20.90
   1  -3   0  460.45   21.00
   1  -3   0  440.86   20.80
  -1   3   0  446.06   21.10
   0  -3   0  103.29    6.10
   0  -3   0  102.19    5.80
   0   3   0  105.59    6.70
   0   3   0  105.49    6.30
  -1  -3   0 1015.00   46.10
  -1  -3   0 1007.10   45.80
   1   3   0  998.20   46.60
   1   3   0 1013.40   46.20
  -2  -3   0 1318.07   59.69
  -2  -3   0 1341.07   59.39
   2   3   0 1237.38   60.19
   2   3   0 1327.17   59.69
  -3  -3   0  617.34   29.50
  -3  -3   0  624.44   30.00
   3   3   0  596.44   31.00
   3   3   0  636.34   30.00
  -4  -3   0 1366.16   63.79
  -4  -3   0 1420.96   63.39
   4   3   0 1289.77   64.89
   4   3   0 1416.36   63.99
  -5  -3   0  916.71   45.80
  -5  -3   0  938.41   45.10
   5   3   0  981.30   45.90
   5   3   0  951.00   43.80
  -6  -3   0    4.70    5.60
  -6  -3   0    7.40    4.80
   6   3   0    3.20    3.10
   6   3   0    1.60    4.10
  -7  -3   0    4.80    8.00
  -7  -3   0    2.30    6.00
  -7  -3   0    5.70    8.40
  -7  -3   0    3.10    7.30
   7   3   0    7.30    4.30
   7   3   0    3.90    5.70
   7   3   0    0.30    3.20
  -8  -3   0    7.80    8.50
  -8  -3   0   10.00    7.30
  -8  -3   0   13.60    9.00
  -8  -3   0    0.70   12.40
   8   3   0    5.90    4.40
   8   3   0    9.30    4.10
   8   3   0    4.80    7.40
   8   3   0   13.60   16.60
  -9  -3   0    8.30    9.10
  -9  -3   0   21.40    7.60
   9   3   0   16.50    9.40
   9   3   0    7.60   15.40
   9   3   0    9.70    6.30
   9   3   0    6.80    4.70
   9   3   0   22.90    5.00
 -10  -3   0   16.30    7.00
  10   3   0   13.90    6.20
  10   3   0    7.20    5.20
  10   3   0   14.20    4.70
  10   3   0    1.80   13.40
 -11  -3   0   17.60    6.50
  11   3   0   18.70    4.60
  11   3   0    3.70    6.60
  11   3   0    6.00    5.10
  11   3   0    3.60   13.10
 -12  -3   0    5.60    4.50
  12   3   0    2.30    4.40
  12   3   0    0.80   12.40
  16  -4   0   17.90    5.30
  16  -4   0   12.00    5.50
 -16   4   0   18.00    5.90
  15  -4   0   19.00    5.40
  15  -4   0    3.00    6.60
 -15   4   0   -0.80    6.10
 -15   4   0    7.90    5.80
  14  -4   0    4.20    8.00
 -14   4   0    7.90    6.20
 -14   4   0    2.30    7.20
  13  -4   0   22.30    9.30
 -13   4   0   11.70    6.90
 -13   4   0   12.80    8.70
  12  -4   0    1.20    5.40
  12  -4   0    6.80    9.00
  12  -4   0    5.00    9.50
 -12   4   0    8.20    8.90
 -12   4   0    5.30    7.10
 -12   4   0    5.90    6.70
  11  -4   0   86.09   12.80
  11  -4   0   69.09   11.30
  11  -4   0   95.59    9.40
  11  -4   0   60.39   16.00
 -11   4   0   90.19   12.30
 -11   4   0   90.69   13.20
 -11   4   0   67.29   10.00
  10  -4   0  153.98   16.70
  10  -4   0  158.68   11.40
  10  -4   0  165.88   18.80
  10  -4   0  176.08   11.70
  10  -4   0  167.58   13.60
 -10   4   0  162.68   16.60
 -10   4   0  159.38   19.30
 -10   4   0  187.08   14.60
   9  -4   0   -2.50    5.90
   9  -4   0   -0.10    4.20
   8  -4   0    4.60    2.90
   8  -4   0   -4.40    4.40
   8  -4   0    2.70    3.00
   7  -4   0 1272.27   59.59
   7  -4   0 1361.46   60.79
   6  -4   0 1805.42   83.09
   6  -4   0 1903.61   83.99
   5  -4   0    2.60    1.40
   5  -4   0    1.60    1.80
   4  -4   0  343.87   15.70
   4  -4   0  314.67   16.10
   3  -4   0 1069.19   48.60
   2  -4   0 2524.45  112.59
   2  -4   0 2522.15  112.49
   1  -4   0 1027.10   46.40
   1  -4   0 1037.10   46.10
  -1   4   0 1018.20   46.70
  -1   4   0  980.10   46.80
   0  -4   0  330.57   15.70
   0  -4   0  306.97   15.90
   0   4   0  333.47   16.30
   0   4   0  310.97   17.10
  -1  -4   0    3.30    1.90
  -1  -4   0    4.10    2.50
   1   4   0    4.20    2.30
   1   4   0    0.80    4.90
  -2  -4   0 1942.11   85.89
  -2  -4   0 1916.01   86.39
   2   4   0 1910.01   86.49
   2   4   0 1827.72   87.29
  -3  -4   0 1361.66   62.29
  -3  -4   0 1338.97   62.89
   3   4   0 1285.27   64.19
   3   4   0 1435.26   63.39
  -4  -4   0    1.50    2.20
  -4  -4   0   -0.50    4.10
  -4  -4   0    3.40    3.50
   4   4   0    2.50    3.60
   4   4   0    2.20    3.00
  -5  -4   0    2.50    4.50
  -5  -4   0    2.10    5.40
   5   4   0    3.70    4.20
   5   4   0    1.90    3.10
  -6  -4   0  145.29   15.80
  -6  -4   0  167.18   13.30
  -6  -4   0  151.78   17.40
  -6  -4   0  153.48   16.40
   6   4   0  164.28   14.00
   6   4   0  164.88   12.00
   6   4   0  163.28   10.50
  -7  -4   0   67.99   11.00
  -7  -4   0   83.99   13.20
  -7  -4   0   86.79   13.90
   7   4   0   76.79    9.00
   7   4   0   81.29   10.30
   7   4   0   48.40   21.20
   7   4   0   85.39    8.00
   7   4   0   86.19   11.80
  -8  -4   0    7.60   10.30
  -8  -4   0    4.80    7.20
   8   4   0   -2.70    6.00
   8   4   0   -1.90    9.00
   8   4   0  -13.20   16.50
   8   4   0    7.30    4.20
   8   4   0    4.00    4.30
  -9  -4   0   11.60    7.00
   9   4   0   25.60   15.50
   9   4   0   19.70    6.50
   9   4   0   11.70    4.80
   9   4   0    5.60    4.80
 -10  -4   0    3.00    5.80
  10   4   0    1.50    5.10
  10   4   0   -4.90   15.40
  10   4   0    7.20    4.30
  10   4   0    6.70    5.50
 -11  -4   0    8.10    4.90
  11   4   0    7.70    4.90
  11   4   0    9.60    4.20
  11   4   0   19.20   13.90
 -12  -4   0   24.60    4.90
  12   4   0   17.10    4.60
  16  -5   0    0.20    5.30
  16  -5   0    0.50    5.60
 -16   5   0   -2.20    5.60
 -16   5   0    7.10    5.70
  15  -5   0   18.40    7.20
 -15   5   0    6.20    8.20
 -15   5   0    3.20    5.60
 -15   5   0   15.60    7.50
  14  -5   0   27.20    8.40
 -14   5   0   37.10    7.50
 -14   5   0   41.50    9.30
  13  -5   0   -1.30    7.80
 -13   5   0    7.10   14.10
 -13   5   0    2.60    8.40
 -13   5   0    4.90    6.30
 -13   5   0    2.00    6.50
  12  -5   0   84.79   12.20
  12  -5   0   57.19   17.90
  12  -5   0   77.39   13.00
 -12   5   0   69.99    8.80
 -12   5   0   71.29   12.80
 -12   5   0   75.69   10.50
  11  -5   0  104.39   13.50
  11  -5   0  110.99   10.90
  11  -5   0  113.79   17.40
  11  -5   0  125.49   16.00
 -11   5   0  129.39   12.80
 -11   5   0  128.89   17.90
 -11   5   0  110.49   15.30
  10  -5   0  371.56   24.00
  10  -5   0  315.07   21.80
  10  -5   0  340.47   20.10
  10  -5   0  301.57   17.90
 -10   5   0  329.97   20.40
 -10   5   0  324.27   22.30
 -10   5   0  331.87   25.90
   9  -5   0   -0.90    4.10
   9  -5   0   -0.90    6.20
   9  -5   0    8.40    3.90
   8  -5   0  934.81   42.70
   8  -5   0  843.32   41.20
   7  -5   0    1.50    2.50
   7  -5   0    0.90    2.10
   6  -5   0   11.90    2.20
   6  -5   0    9.30    2.60
   5  -5   0  228.98   10.80
   5  -5   0  195.48   11.20
   5  -5   0  191.08   11.20
   4  -5   0    3.90    2.20
   4  -5   0    6.90    2.60
   3  -5   0 1331.37   62.59
   3  -5   0 1434.96   62.89
   2  -5   0 1372.66   62.69
   2  -5   0 1397.16   62.89
   1  -5   0    3.30    1.90
   1  -5   0    3.40    2.30
  -1   5   0    7.00    5.00
  -1   5   0    2.20    2.20
   0  -5   0  213.88   11.30
   0  -5   0  204.88   11.80
   0   5   0  207.38   12.20
  -1  -5   0   15.10    3.30
  -1  -5   0    7.50    3.10
  -1  -5   0    9.40    2.60
   1   5   0    8.10    3.20
   1   5   0   13.80    6.70
  -2  -5   0    0.60    2.70
  -2  -5   0    9.00    3.40
  -2  -5   0    5.20    3.90
   2   5   0    2.30    3.00
   2   5   0   10.50    8.50
  -3  -5   0  980.70   44.90
  -3  -5   0  910.91   45.70
  -3  -5   0  924.41   43.80
   3   5   0  990.90   46.30
   3   5   0  932.71   43.90
  -4  -5   0    3.90    4.30
  -4  -5   0    0.90    3.20
  -4  -5   0   10.90    5.90
   4   5   0    2.60    4.10
   4   5   0    2.10    3.00
  -5  -5   0  326.77   19.50
  -5  -5   0  335.67   22.60
   5   5   0  332.97   21.00
   5   5   0  301.87   18.70
   5   5   0  337.17   21.40
   5   5   0  329.07   17.50
  -6  -5   0  110.59   13.80
  -6  -5   0  102.29   14.70
   6   5   0  114.29    9.20
   6   5   0  123.49   13.90
   6   5   0  108.09   10.60
   6   5   0  142.79   14.50
  -7  -5   0   78.49   11.50
   7   5   0   83.19   10.70
   7   5   0   61.09   11.50
   7   5   0   68.79    8.70
   7   5   0   67.89    7.90
  -8  -5   0    6.60    6.70
   8   5   0    1.40    4.30
   8   5   0    6.60    4.30
   8   5   0   -5.50   11.70
   8   5   0    3.90    6.10
  -9  -5   0   21.50    6.60
   9   5   0   37.00    6.00
   9   5   0   32.40    7.20
   9   5   0   35.30    5.50
 -10  -5   0    4.60    4.90
  10   5   0    5.10    3.90
  10   5   0   -0.90    4.90
 -11  -5   0    0.50    3.90
  11   5   0   -3.60    4.00
  16  -6   0   11.10    6.10
  16  -6   0   17.50    6.30
 -16   6   0   16.40    5.30
 -16   6   0   14.80    6.60
 -16   6   0   18.70    8.20
  15  -6   0   -5.10    6.30
 -15   6   0    0.90    5.40
 -15   6   0   -7.10    7.40
  14  -6   0   47.60    8.80
 -14   6   0   40.70    9.50
 -14   6   0   53.49    8.40
  13  -6   0    8.30    8.00
  13  -6   0  -15.70   14.20
 -13   6   0    1.60    6.10
 -13   6   0   -6.60    9.30
 -13   6   0   13.50    6.80
  12  -6   0   31.30   15.10
  12  -6   0    5.40   10.70
  12  -6   0    9.50    8.90
 -12   6   0   13.60   11.20
 -12   6   0   12.40    7.50
 -12   6   0   19.10    6.60
  11  -6   0  115.99   13.70
  11  -6   0  119.59   15.50
  11  -6   0  101.69   16.10
 -11   6   0  128.89   15.00
 -11   6   0  114.49   12.30
 -11   6   0   78.59   13.20
  10  -6   0  150.88   15.60
  10  -6   0  170.38   13.80
  10  -6   0  168.48   15.00
  10  -6   0  138.09   15.90
 -10   6   0  172.68   14.30
 -10   6   0  177.68   16.20
   9  -6   0   -0.40    4.10
   9  -6   0    1.80    4.00
   8  -6   0   48.10    5.80
   8  -6   0   50.59    6.60
   7  -6   0  386.76   20.60
   7  -6   0  408.86   19.90
   6  -6   0 1722.43   73.39
   6  -6   0 1513.65   73.79
   5  -6   0    9.30    3.00
   5  -6   0   15.10    3.30
   5  -6   0   11.30    2.40
   4  -6   0 2019.60   91.29
   4  -6   0 2024.00   91.19
   3  -6   0  661.63   31.80
   3  -6   0  677.43   31.50
   2  -6   0 2015.30   89.99
   2  -6   0 1982.20   89.69
   2  -6   0 1983.90   90.19
   1  -6   0   11.30    3.10
   1  -6   0   10.10    2.60
   1  -6   0   11.40    3.30
  -1   6   0    8.70    3.10
   0  -6   0 1621.54   74.49
   0  -6   0 1643.34   74.99
   0  -6   0 1627.74   75.39
   0   6   0 1701.03   76.39
  -1  -6   0  425.76   20.40
  -1  -6   0  383.26   19.60
  -1  -6   0  373.26   21.00
   1   6   0  385.36   19.80
   1   6   0  404.86   21.60
  -2  -6   0   51.69    6.40
  -2  -6   0   61.19    6.80
  -2  -6   0   55.09    8.60
   2   6   0   51.09    6.20
   2   6   0   56.89    7.30
  -3  -6   0   -4.40    4.10
  -3  -6   0    5.20    3.20
  -3  -6   0    1.90    5.20
  -3  -6   0    5.90    6.50
   3   6   0    1.20    4.20
   3   6   0    4.80    3.50
  -4  -6   0  165.08   13.10
  -4  -6   0  187.48   16.20
   4   6   0  155.28   15.60
   4   6   0  165.28   10.90
   4   6   0  158.18   12.90
   4   6   0  177.68   14.50
  -5  -6   0  121.69   14.40
  -5  -6   0  125.59   15.00
   5   6   0  116.09   14.10
   5   6   0  118.79   10.90
   5   6   0  112.39   14.20
   5   6   0  111.29    9.30
  -6  -6   0    7.50    7.30
   6   6   0    7.20    4.10
   6   6   0   16.10    8.60
   6   6   0   14.00    7.10
   6   6   0   15.70    5.10
  -7  -6   0  -11.00    5.80
   7   6   0    4.30    4.40
   7   6   0   -9.70   10.30
   7   6   0    2.00    6.70
   7   6   0   -6.40    4.20
  -8  -6   0   82.59   11.30
   8   6   0   69.29    8.40
   8   6   0   66.49    8.40
   8   6   0   57.39    8.70
  -9  -6   0    2.10    4.80
   9   6   0   -2.00    3.60
   9   6   0    0.20    4.80
 -10  -6   0   17.10    4.90
  10   6   0   19.80    4.30
  10   6   0   16.10    4.90
  16  -7   0   95.29   10.80
 -16   7   0   84.59    9.50
 -16   7   0  111.79   13.00
  15  -7   0    5.70    6.20
 -15   7   0   -3.00    5.20
 -15   7   0    2.40    8.10
  14  -7   0  403.36   25.60
 -14   7   0  382.16   24.20
 -14   7   0  399.86   27.70
  13  -7   0   -3.10    7.20
  13  -7   0   46.30   28.50
  13  -7   0   31.40   18.90
 -13   7   0    5.20   10.40
 -13   7   0    4.80    5.80
 -13   7   0    1.80    6.70
  12  -7   0   44.90   13.30
  12  -7   0   63.39   13.40
 -12   7   0   70.69    8.80
 -12   7   0   41.90    8.90
  11  -7   0   93.89   13.60
  11  -7   0   69.19   12.10
  11  -7   0   84.69   14.30
 -11   7   0   81.09   11.70
 -11   7   0   97.99   14.00
  10  -7   0  -10.90    7.00
  10  -7   0    6.80    7.70
  10  -7   0    4.90    5.70
  10  -7   0    2.10    5.90
 -10   7   0   -5.00    6.20
 -10   7   0    7.40    7.30
   9  -7   0  508.75   26.40
   9  -7   0  496.65   28.80
   9  -7   0  480.05   25.00
  -9   7   0  460.35   26.90
  -9   7   0  501.25   28.90
   8  -7   0  567.94   29.20
   8  -7   0  585.64   28.40
   7  -7   0  348.87   18.00
   7  -7   0  345.07   18.80
   6  -7   0  402.56   20.70
   6  -7   0  412.46   21.00
   6  -7   0  403.26   20.30
   5  -7   0    1.20    2.00
   5  -7   0    1.20    3.00
   5  -7   0    1.50    2.90
   4  -7   0 1421.96   67.29
   4  -7   0 1426.76   67.09
   4  -7   0 1555.54   66.99
   3  -7   0 1459.75   65.89
   3  -7   0 1424.96   66.19
   2  -7   0    3.10    2.90
   2  -7   0    2.20    2.50
   2  -7   0    3.80    3.60
   1  -7   0  390.96   20.90
   1  -7   0  393.56   20.10
   1  -7   0  398.76   19.80
  -1   7   0  388.76   20.00
  -1   7   0  393.56   21.60
   0  -7   0  352.26   18.50
   0  -7   0  350.16   18.10
   0  -7   0  349.37   19.60
   0   7   0  370.16   20.40
   0   7   0  331.17   18.20
  -1  -7   0  656.43   28.90
  -1  -7   0  576.64   29.50
  -1  -7   0  577.34   28.80
  -1  -7   0  586.94   30.70
   1   7   0  544.45   28.80
   1   7   0  626.84   31.80
  -2  -7   0  481.45   26.30
  -2  -7   0  533.95   25.30
  -2  -7   0  505.05   25.50
  -2  -7   0  524.05   29.30
   2   7   0  509.65   25.50
   2   7   0  507.25   28.60
  -3  -7   0    3.30    6.20
  -3  -7   0   -7.20    7.20
  -3  -7   0   12.70    5.00
   3   7   0   -0.80    3.40
   3   7   0    8.20    7.90
   3   7   0    7.10    5.90
   3   7   0   -4.30    5.90
  -4  -7   0   97.19   13.70
  -4  -7   0   85.59   13.10
   4   7   0   80.69   13.00
   4   7   0   69.29   10.10
   4   7   0   75.59   10.90
   4   7   0   79.49    8.00
  -5  -7   0   78.29   12.30
   5   7   0   94.29   15.40
   5   7   0   73.89   10.90
   5   7   0   72.09    8.30
   5   7   0   69.19    9.60
  -6  -7   0   -4.80    5.90
   6   7   0    2.90    4.70
   6   7   0   19.40   11.40
   6   7   0   -2.00    4.10
   6   7   0    0.60    6.90
  -7  -7   0  401.26   24.40
   7   7   0  364.16   21.50
   7   7   0  415.66   22.00
   7   7   0  434.76   25.40
  -8  -7   0   14.80    5.40
   8   7   0    5.60    3.80
   8   7   0   -0.50    5.40
  -9  -7   0   91.99    9.30
   9   7   0   93.99    8.30
   9   7   0  113.19   10.10
  16  -8   0   -0.60    4.90
 -16   8   0   -2.20    4.60
 -16   8   0    1.20    7.90
  15  -8   0   15.20    6.10
 -15   8   0    5.80    8.60
 -15   8   0    0.70    5.20
  14  -8   0   59.99    9.40
 -14   8   0   57.89    8.90
 -14   8   0   85.99   13.10
 -14   8   0   76.49   10.30
  13  -8   0  -24.20   15.40
  13  -8   0   -2.30    6.60
 -13   8   0   -2.20    6.60
 -13   8   0   -6.40   10.70
 -13   8   0    7.10    5.80
  12  -8   0  -10.30   12.60
  12  -8   0    3.20    7.00
  12  -8   0   -4.60   12.80
 -12   8   0    9.70    6.00
 -12   8   0    5.50    7.20
 -12   8   0    4.10   11.80
  11  -8   0    1.70   10.40
  11  -8   0   26.30    9.50
  11  -8   0   12.50    7.60
 -11   8   0    0.10    7.10
 -11   8   0   15.90    6.50
  10  -8   0   11.40    6.40
  10  -8   0   21.30    7.50
  10  -8   0    8.10    7.60
  10  -8   0   -4.50   12.40
 -10   8   0   10.80    7.70
 -10   8   0    7.60    6.40
   9  -8   0  216.78   16.10
   9  -8   0  278.67   18.90
   9  -8   0  243.28   15.00
  -9   8   0  242.48   19.00
  -9   8   0  218.78   16.80
   8  -8   0   55.49    6.70
   8  -8   0   53.99    8.50
   7  -8   0  605.04   30.90
   7  -8   0  622.74   30.10
   6  -8   0   66.59    5.80
   6  -8   0   48.20    7.30
   6  -8   0   60.19    6.30
   5  -8   0 1000.60   45.60
   5  -8   0  969.90   45.90
   5  -8   0  943.61   46.00
   4  -8   0    4.40    3.10
   4  -8   0   14.20    4.60
   4  -8   0   -0.80    2.30
   3  -8   0 1014.50   47.60
   3  -8   0 1076.19   47.60
   3  -8   0  960.50   48.10
   2  -8   0   59.19    5.70
   2  -8   0   53.99    8.50
   2  -8   0   57.69    6.30
   1  -8   0  657.23   30.20
   1  -8   0  587.04   30.00
   1  -8   0  605.84   30.50
  -1   8   0  622.74   32.60
   0  -8   0   63.89    7.30
   0  -8   0   65.49    6.40
   0  -8   0   48.60    7.20
   0   8   0   48.10    7.00
   0   8   0   66.29    9.20
  -1  -8   0  220.58   14.70
  -1  -8   0  249.48   13.70
  -1  -8   0  238.88   14.20
  -1  -8   0  197.08   17.80
   1   8   0  231.78   17.00
   1   8   0  204.88   19.70
   1   8   0  235.98   16.50
   1   8   0  219.28   13.80
  -2  -8   0   -1.00    5.10
  -2  -8   0   19.20    7.40
  -2  -8   0   10.10    6.30
   2   8   0   12.50    7.30
   2   8   0   20.20    8.70
   2   8   0   15.50    6.20
   2   8   0   13.10    4.20
  -3  -8   0   -0.80    8.50
  -3  -8   0   15.40    6.90
   3   8   0    6.90    4.20
   3   8   0   11.10    8.10
   3   8   0   16.00    8.30
   3   8   0    7.90    5.40
  -4  -8   0    3.40    6.40
   4   8   0   -1.40    8.90
   4   8   0   -1.80    4.90
   4   8   0    6.10    7.20
   4   8   0   -0.50    3.90
  -5  -8   0   -0.30    6.00
   5   8   0    1.50    4.50
   5   8   0   -3.50   11.00
   5   8   0    3.50    4.20
   5   8   0   -1.10    6.60
  -6  -8   0   73.39   10.90
   6   8   0   52.49    8.60
   6   8   0   68.99    8.60
  -7  -8   0    8.10    5.10
   7   8   0   -0.30    3.60
   7   8   0   -0.10    5.40
  -8  -8   0    3.50    4.20
   8   8   0    1.70    4.30
   8   8   0   -2.80    3.40
  16  -9   0  109.99   10.60
 -16   9   0   93.39    9.70
 -16   9   0   91.69   11.60
  15  -9   0   -8.10    5.10
 -15   9   0  -11.40    9.40
 -15   9   0    5.00    5.20
  14  -9   0   33.20    8.10
 -14   9   0   38.00    8.00
 -14   9   0   40.40    6.50
 -14   9   0   35.60   11.90
  13  -9   0   19.70    7.20
  13  -9   0   11.30   14.90
 -13   9   0    8.70    7.00
 -13   9   0    4.80    5.60
 -13   9   0    9.00   12.00
  12  -9   0   20.00   12.10
  12  -9   0    9.10    7.40
 -12   9   0   16.80    6.20
 -12   9   0   10.60    7.60
  11  -9   0   -4.90   12.10
  11  -9   0   13.70   10.30
  11  -9   0    9.00    9.30
  11  -9   0   -0.10    7.00
  11  -9   0  -17.40   15.50
 -11   9   0   -0.60    6.90
 -11   9   0   -0.40    6.00
  10  -9   0   70.99   10.30
  10  -9   0   48.00    8.00
  10  -9   0   83.49   12.40
 -10   9   0   51.19    9.90
 -10   9   0   52.89    8.50
   9  -9   0    5.50    7.40
   9  -9   0   -4.80    6.60
   9  -9   0    5.30    5.00
  -9   9   0    5.00    6.80
  -9   9   0   10.70    8.30
   8  -9   0  230.48   18.40
   8  -9   0  240.98   14.60
  -8   9   0  224.38   19.30
  -8   9   0  232.38   17.60
   7  -9   0  516.15   29.60
   7  -9   0  528.85   26.40
   7  -9   0  500.75   27.30
   6  -9   0   -0.80    2.90
   6  -9   0    8.90    5.50
   6  -9   0   -0.10    3.40
   5  -9   0   -0.10    2.70
   5  -9   0    4.50    3.40
   5  -9   0    0.60    5.40
   4  -9   0    0.60    3.30
   4  -9   0    1.10    2.80
   4  -9   0    6.80    5.70
   3  -9   0    0.20    6.20
   3  -9   0    6.60    3.70
   3  -9   0    1.60    2.90
   2  -9   0  492.45   29.70
   2  -9   0  552.14   26.90
   2  -9   0  545.55   27.00
   1  -9   0  251.87   14.30
   1  -9   0  214.38   17.80
   1  -9   0  245.48   14.50
  -1   9   0  222.28   20.40
  -1   9   0  238.88   17.60
   0  -9   0   22.60   10.50
   0  -9   0   15.30    5.30
   0  -9   0    1.40    6.90
   0  -9   0    4.50    5.30
   0  -9   0    9.50    4.70
   0   9   0    2.90    6.60
   0   9   0   11.00    6.30
   0   9   0   -3.60    8.70
  -1  -9   0   47.80   13.60
  -1  -9   0   46.20    8.80
  -1  -9   0   47.50    7.20
  -1  -9   0   54.79    8.70
   1   9   0   78.89   10.90
   1   9   0   55.49    9.60
   1   9   0   63.29    8.40
  -2  -9   0    4.40    6.50
   2   9   0    2.00    4.30
   2   9   0   -0.80    7.30
   2   9   0   -7.40    7.90
   2   9   0   13.40    5.70
  -3  -9   0   14.80    6.70
   3   9   0    3.10    7.60
   3   9   0   16.00    6.00
   3   9   0    8.20    9.40
  -4  -9   0   10.40    6.20
   4   9   0    9.90    7.00
   4   9   0   16.30    5.50
  -5  -9   0   33.70    7.20
   5   9   0   32.40    7.70
   5   9   0   37.90    6.10
  -6  -9   0   -4.70    4.70
   6   9   0   -0.10    5.40
   6   9   0    5.10    3.80
  -7  -9   0  107.59    9.20
   7   9   0  101.69    8.10
   7   9   0  103.29   10.40
  16 -10   0   13.70    4.90
 -16  10   0   13.90    9.90
 -16  10   0   12.70    4.90
  15 -10   0   12.60    5.70
 -15  10   0    3.80    5.30
 -15  10   0    4.40    5.80
 -15  10   0    6.10   10.80
  14 -10   0    9.00    5.70
 -14  10   0    6.80    6.00
 -14  10   0    2.20    5.20
 -14  10   0    0.80   12.70
  13 -10   0    9.80    6.30
 -13  10   0   12.70   12.80
 -13  10   0    6.80    5.60
 -13  10   0    2.40    6.60
  12 -10   0  155.58   21.40
  12 -10   0  198.48   16.50
  12 -10   0  145.39   21.40
 -12  10   0  189.08   14.50
 -12  10   0  182.88   17.30
  11 -10   0    4.60    9.80
  11 -10   0    4.90    6.70
  11 -10   0   -6.30   10.00
 -11  10   0    6.90    6.20
 -11  10   0   11.10    7.70
  10 -10   0   50.89   10.80
  10 -10   0   34.70    8.10
  10 -10   0   43.90    8.80
 -10  10   0   58.59   10.20
 -10  10   0   55.89    8.50
   9 -10   0   62.49    9.50
   9 -10   0   54.09    8.20
  -9  10   0   60.89   10.80
  -9  10   0   50.49    8.20
   8 -10   0    6.10    6.90
   8 -10   0   11.40    5.20
  -8  10   0    6.50    6.70
  -8  10   0   11.10    8.70
   7 -10   0    4.30    3.90
   7 -10   0   -3.20    7.10
  -7  10   0    2.30    6.90
  -7  10   0    5.60    8.70
   6 -10   0  182.88   15.90
   6 -10   0  180.68   12.00
  -6  10   0  205.18   19.40
  -6  10   0  150.48   16.00
   5 -10   0  364.96   22.50
   5 -10   0  347.77   19.60
   5 -10   0  337.87   19.30
   5 -10   0  368.26   23.20
  -5  10   0  346.77   24.70
  -5  10   0  330.17   22.40
   4 -10   0  160.28   16.90
   4 -10   0  189.68   12.20
   4 -10   0  177.78   16.00
   4 -10   0  192.68   12.30
  -4  10   0  150.98   19.50
  -4  10   0  174.18   15.80
   3 -10   0    3.90    3.90
   3 -10   0    3.50    8.80
   3 -10   0    6.50    7.00
   3 -10   0    2.70    4.10
  -3  10   0    8.80    9.40
   2 -10   0   17.30    5.00
   2 -10   0    7.20    6.90
   2 -10   0    1.30    8.50
   2 -10   0   14.10    4.70
  -2  10   0    7.90    9.30
  -2  10   0   14.00    7.10
   1 -10   0   43.80    8.70
   1 -10   0   52.39   10.50
   1 -10   0   56.39    8.70
   1 -10   0   66.09    8.90
  -1  10   0   74.29   11.40
  -1  10   0   73.39   11.00
   0 -10   0   38.10    8.40
   0 -10   0   26.90    9.80
   0 -10   0   38.80    7.00
   0 -10   0   51.19    7.80
   0  10   0   34.70    7.10
   0  10   0   20.20    8.50
  -1 -10   0    0.90    6.20
   1  10   0   -0.90    7.80
   1  10   0   13.50    9.60
   1  10   0    6.10    5.70
  -2 -10   0  193.18   16.00
   2  10   0  224.58   22.80
   2  10   0  210.98   18.00
   2  10   0  195.58   14.70
  -3 -10   0    6.00    5.70
   3  10   0   13.30    7.30
   3  10   0   14.70    5.20
  -4 -10   0    3.60    5.10
   4  10   0   10.20    6.30
   4  10   0    8.70    4.30
  -5 -10   0    9.80    4.90
   5  10   0   10.10    5.40
   5  10   0    6.80    4.00
  -6 -10   0   12.00    4.30
   6  10   0    9.20    4.90
  16 -11   0   -3.30    3.90
 -16  11   0   -5.20    4.20
 -16  11   0  -19.00   10.90
  15 -11   0   11.80    5.50
 -15  11   0   10.60    5.70
 -15  11   0   15.00   12.50
 -15  11   0    9.30    5.60
  14 -11   0   15.60    5.80
 -14  11   0   23.00    6.70
 -14  11   0   -1.20   14.20
 -14  11   0   12.60    5.50
  13 -11   0    1.20    5.70
 -13  11   0  -33.40   13.60
 -13  11   0    2.00    6.30
 -13  11   0    6.90    5.30
  12 -11   0  123.39   18.10
  12 -11   0  141.89   21.70
  12 -11   0  173.38   14.60
 -12  11   0  164.48   15.50
 -12  11   0  154.28   13.60
  11 -11   0   13.70   10.20
  11 -11   0   18.90    9.00
  11 -11   0   22.70    7.40
 -11  11   0   18.40    6.40
 -11  11   0   20.30    8.00
  10 -11   0   -2.40    7.40
  10 -11   0    2.50    6.00
  10 -11   0    1.40    7.30
 -10  11   0    5.00    7.40
 -10  11   0    1.90    5.80
   9 -11   0   -0.60    6.10
   9 -11   0    9.50    6.60
  -9  11   0    1.60    7.80
  -9  11   0    4.10    6.10
   8 -11   0   11.00    7.00
   8 -11   0    0.00    5.50
  -8  11   0    6.00    6.50
  -8  11   0    2.60    8.00
   7 -11   0   93.39    9.50
   7 -11   0   89.29   12.90
  -7  11   0  100.99   12.90
  -7  11   0   68.89   10.30
   6 -11   0  130.79   14.30
   6 -11   0  121.19   10.80
  -6  11   0   99.29   13.20
  -6  11   0  135.89   14.20
   5 -11   0  124.59   10.80
   5 -11   0  118.89   10.60
   5 -11   0  151.18   14.60
   5 -11   0  119.29   14.40
  -5  11   0  126.69   14.30
  -5  11   0  121.99   16.60
   4 -11   0   89.49   11.50
   4 -11   0   76.69    9.50
   4 -11   0   81.49   12.90
   4 -11   0   73.19    9.20
  -4  11   0   83.39   12.50
  -4  11   0   61.49   11.40
   3 -11   0   12.90    8.20
   3 -11   0    5.40    5.20
   3 -11   0    6.20    5.60
   3 -11   0   14.00    7.10
  -3  11   0   10.20    9.00
   2 -11   0    2.10    6.50
   2 -11   0   -0.40    5.50
   2 -11   0    6.40    5.70
   2 -11   0   -6.00    8.30
  -2  11   0    4.80    6.10
  -2  11   0    4.00    8.60
   1 -11   0  -10.90    8.80
   1 -11   0  -13.80    6.80
   1 -11   0    1.70    6.40
   1 -11   0    4.10    6.60
  -1  11   0   -1.70    5.70
  -1  11   0    3.30    8.30
   0 -11   0   24.40   10.70
   0 -11   0   12.40    6.50
   0  11   0   13.50    8.30
   0  11   0   23.30    6.50
  -1 -11   0  159.48   14.60
   1  11   0  185.18   17.10
   1  11   0  163.28   13.30
  -2 -11   0    0.80    5.30
   2  11   0    2.70    6.70
   2  11   0    3.00    4.70
  -3 -11   0    9.50    5.50
   3  11   0   11.20    6.50
   3  11   0   24.60    5.30
  -4 -11   0   15.10    5.00
   4  11   0    9.60    5.70
  -5 -11   0    1.20    4.10
   5  11   0    1.00    4.70
   5  11   0    4.70    3.60
  16 -12   0   17.80    4.30
 -16  12   0   14.60    4.80
  15 -12   0    3.40    4.30
 -15  12   0   -7.00   14.10
 -15  12   0   10.00    5.20
 -15  12   0   10.30    5.40
  14 -12   0   43.70    6.90
 -14  12   0   37.00   17.00
 -14  12   0   38.20    7.10
 -14  12   0   44.40    6.10
  13 -12   0   89.99   11.30
  13 -12   0  108.89   16.60
 -13  12   0   92.09   10.40
 -13  12   0   93.29   12.90
  12 -12   0  314.37   23.10
  12 -12   0  347.77   21.90
 -12  12   0  373.26   23.40
 -12  12   0  350.26   20.90
  11 -12   0  158.48   16.20
  11 -12   0  160.08   14.30
 -11  12   0  159.88   13.80
 -11  12   0  152.38   16.00
  10 -12   0  162.98   17.90
  10 -12   0  192.58   17.10
  10 -12   0  195.08   15.50
 -10  12   0  194.98   15.30
 -10  12   0  190.28   18.00
   9 -12   0    5.20    6.90
   9 -12   0   13.70    7.30
   9 -12   0    9.40    6.30
  -9  12   0   17.50    6.50
  -9  12   0    8.40    7.60
   8 -12   0   -2.20    6.70
   8 -12   0    7.30    6.60
  -8  12   0   -6.30    7.90
  -8  12   0   -1.60    6.00
   7 -12   0   62.29    9.00
   7 -12   0   75.99   11.70
  -7  12   0   80.89   12.00
  -7  12   0   82.99   12.20
   6 -12   0   15.10    7.00
   6 -12   0   17.90    6.30
  -6  12   0   24.40    7.00
  -6  12   0   17.20    9.10
   5 -12   0   85.79   12.30
   5 -12   0   55.09    8.20
  -5  12   0   59.89   11.50
  -5  12   0   86.89   11.80
   4 -12   0   -0.20    5.90
   4 -12   0    0.60    7.50
   4 -12   0   -4.90    6.40
  -4  12   0   -1.30    8.50
  -4  12   0   -4.10    6.30
   3 -12   0   13.80    7.20
   3 -12   0    8.80    6.60
   3 -12   0    6.00    7.60
  -3  12   0   21.00    6.70
  -3  12   0   18.30    9.20
   2 -12   0  195.18   15.90
   2 -12   0  186.48   17.40
   2 -12   0  171.98   17.50
  -2  12   0  184.78   15.00
  -2  12   0  197.98   18.30
   1 -12   0  178.78   14.30
   1 -12   0  112.09   16.50
  -1  12   0  146.39   16.60
   0 -12   0  318.57   20.70
   0  12   0  355.36   23.50
  -1 -12   0   82.19   10.40
   1  12   0   94.29   13.30
  -2 -12   0   49.50    6.90
   2  12   0   41.50    7.80
  -3 -12   0    0.10    4.20
   3  12   0    5.00    3.70
   3  12   0    3.40    5.20
  -4 -12   0   15.20    4.20
   4  12   0   19.60    5.20
   4  12   0   25.90    4.40
  15 -13   0   -0.20    3.90
 -15  13   0   -2.90    4.40
  14 -13   0    2.10    4.30
 -14  13   0    0.90    5.00
 -14  13   0    2.50    4.40
  13 -13   0   -1.20    4.60
  13 -13   0    4.30    7.90
 -13  13   0    5.40    5.70
 -13  13   0    0.90    4.60
  12 -13   0   97.39   13.00
  12 -13   0   83.49   10.60
 -12  13   0  111.99   13.00
 -12  13   0   84.19   10.30
  11 -13   0   -3.00    5.10
  11 -13   0   -2.50    5.90
 -11  13   0    2.50    5.00
 -11  13   0   -1.10    6.10
  10 -13   0   10.20    5.70
  10 -13   0   10.00    6.50
 -10  13   0   10.30    7.40
 -10  13   0    8.70    5.60
   9 -13   0   12.30    6.40
   9 -13   0    6.60    5.80
  -9  13   0   15.50    6.30
  -9  13   0   11.40    7.70
   8 -13   0    8.60    7.70
   8 -13   0   -2.10    5.60
  -8  13   0    0.10    5.70
  -8  13   0   -4.60    7.70
   7 -13   0   -5.70    7.20
   7 -13   0    0.60    6.00
  -7  13   0    2.30    7.70
  -7  13   0   -1.80    5.70
   6 -13   0   -1.80    7.60
   6 -13   0    2.30    6.10
  -6  13   0   -2.80    5.80
  -6  13   0   -0.60    7.70
   5 -13   0    3.30    5.70
   5 -13   0   -3.10    7.90
  -5  13   0    2.40    6.20
  -5  13   0    8.30    7.90
   4 -13   0   14.10    6.30
  -4  13   0   25.70    9.00
  -4  13   0   14.70    6.60
   3 -13   0   18.40    6.30
  -3  13   0    5.60    7.70
  -3  13   0    9.50    5.70
   2 -13   0   -6.60    6.70
   2 -13   0    8.50    5.50
  -2  13   0    4.90    7.40
  -2  13   0    7.40    5.70
   1 -13   0   84.69   13.30
   1 -13   0   95.19   10.90
  -1  13   0   82.59   11.10
  -1  13   0   99.39   10.40
   0 -13   0    7.40    5.00
   0  13   0    7.50    6.30
   0  13   0    0.30    4.40
  -1 -13   0    1.30    4.40
   1  13   0   -3.90    5.30
   1  13   0   -0.40    3.90
  -2 -13   0    1.20    4.10
   2  13   0    0.00    3.60
   2  13   0   -1.30    4.80
  15 -14   0    0.70    3.70
 -15  14   0    0.80    4.10
  14 -14   0   22.00    4.90
 -14  14   0   23.10    5.70
 -14  14   0   22.60    4.90
  13 -14   0    1.80    6.60
  13 -14   0    3.90    4.20
 -13  14   0    2.00    4.40
 -13  14   0    3.00    5.10
  12 -14   0   31.80    6.00
  12 -14   0   44.10    7.50
 -12  14   0   37.40    6.00
 -12  14   0   49.70    7.90
  11 -14   0   17.10    5.50
  11 -14   0   13.00    6.30
 -11  14   0   17.00    5.40
 -11  14   0   20.60    6.50
  10 -14   0    1.70    5.00
  10 -14   0    5.00    5.20
 -10  14   0    9.50    6.80
 -10  14   0   -1.50    4.80
   9 -14   0   34.50    7.50
   9 -14   0   38.70    6.90
  -9  14   0   35.50    6.80
  -9  14   0   25.30    7.90
   8 -14   0   79.59   11.30
   8 -14   0   79.09   10.40
  -8  14   0   75.59   10.20
  -8  14   0   64.89    9.80
   7 -14   0  444.66   26.10
   7 -14   0  411.76   24.30
  -7  14   0  435.06   27.00
  -7  14   0  405.26   24.40
   6 -14   0   92.89   11.40
   6 -14   0   74.49   10.50
  -6  14   0   96.09   13.40
  -6  14   0   58.59    8.50
   5 -14   0   38.30    7.00
   5 -14   0   33.30    7.00
  -5  14   0   29.30    6.40
  -5  14   0   27.30    8.00
   4 -14   0    9.10    5.10
   4 -14   0    6.70    6.30
  -4  14   0    4.90    5.30
  -4  14   0    6.90    7.20
   3 -14   0   15.20    5.40
   3 -14   0   19.00    6.40
  -3  14   0   20.90    7.30
  -3  14   0   23.30    5.80
   2 -14   0   45.80    6.50
   2 -14   0   37.50    7.60
  -2  14   0   61.49    8.70
  -2  14   0   37.70    7.90
   1 -14   0    4.50    4.50
  -1  14   0    7.10    5.80
  -1  14   0   -0.10    4.00
   0 -14   0   26.10    4.60
   0  14   0   20.30    4.60
   0  14   0   31.40    6.40
   1  14   0    0.00    4.30
   1  14   0    5.40    3.70
  14 -15   0    1.40    3.50
 -14  15   0    1.60    4.40
 -14  15   0   -2.90    9.10
  13 -15   0    0.30    3.70
  13 -15   0    2.80    5.60
 -13  15   0   -2.60    4.50
 -13  15   0    3.30    4.20
  12 -15   0    8.90    4.20
  12 -15   0   -2.00    4.90
 -12  15   0    8.90    5.10
 -12  15   0    3.60    4.10
  11 -15   0   12.90    5.80
  11 -15   0   11.30    4.50
 -11  15   0   16.20    5.10
 -11  15   0   17.10    6.00
  10 -15   0   12.20    4.80
  10 -15   0    7.80    5.40
 -10  15   0    3.00    4.50
 -10  15   0    6.40    5.90
   9 -15   0   -0.70    4.50
   9 -15   0   -5.90    4.80
  -9  15   0   -4.10    5.70
  -9  15   0    1.90    4.20
   8 -15   0   11.70    5.60
   8 -15   0    7.40    4.70
  -8  15   0   11.40    5.10
  -8  15   0   10.70    6.40
   7 -15   0   10.80    5.60
   7 -15   0    3.80    4.60
  -7  15   0    4.10    6.10
  -7  15   0    9.60    4.70
   6 -15   0   -2.30    4.60
   6 -15   0   -3.80    5.00
  -6  15   0    6.00    6.30
  -6  15   0   -2.00    4.50
   5 -15   0    8.90    5.50
   5 -15   0    5.60    4.80
  -5  15   0    7.20    6.50
  -5  15   0    4.90    4.40
   4 -15   0    8.70    4.60
   4 -15   0   10.00    5.20
  -4  15   0   10.00    6.00
  -4  15   0   10.50    4.50
   3 -15   0    6.40    5.60
   3 -15   0    4.80    4.10
  -3  15   0    6.20    3.90
  -3  15   0    3.50    5.30
   2 -15   0   -1.20    4.00
  -2  15   0    0.20    3.60
  -2  15   0   -5.90    4.70
  -1  15   0    3.80    4.70
  -1  15   0    7.80    3.70
  12 -16   0   20.60    4.20
  12 -16   0   15.30    4.90
 -12  16   0   15.10    4.80
 -12  16   0   27.50    4.50
  11 -16   0   -4.50    4.10
  11 -16   0    6.70    3.80
 -11  16   0   -3.10    4.70
 -11  16   0    5.00    3.90
  10 -16   0    7.50    4.20
  10 -16   0   11.80    4.10
 -10  16   0   12.60    4.30
 -10  16   0   16.30    5.70
   9 -16   0   87.39    9.50
   9 -16   0   94.69    8.20
  -9  16   0   95.69    8.90
  -9  16   0   96.99   10.40
   8 -16   0   -2.90    3.90
   8 -16   0    3.00    3.70
  -8  16   0    2.60    5.10
  -8  16   0    5.90    4.00
   7 -16   0   89.69    8.20
   7 -16   0   92.59    9.80
  -7  16   0  102.09    9.10
  -7  16   0  104.09   11.10
   6 -16   0   11.40    3.90
   6 -16   0   14.90    5.00
  -6  16   0   13.90    4.30
  -6  16   0   10.70    5.50
   5 -16   0    2.70    4.50
  -5  16   0   -1.30    3.50
  -5  16   0    0.60    4.80
   4 -16   0   17.00    5.60
  -4  16   0   28.00    4.50
  -4  16   0   14.80    5.50
  -4  16  -1  102.59    8.10
  -4  16  -1   79.69    9.90
   4 -16   1   88.49    9.30
  -5  16  -1   25.30    5.90
  -5  16  -1   23.90    4.50
   5 -16   1   13.70    4.70
   5 -16   1   26.90    4.30
  -6  16  -1   16.80    5.50
  -6  16  -1   14.20    4.30
   6 -16   1   18.40    4.40
   6 -16   1   10.90    4.10
  -7  16  -1   39.70    6.70
  -7  16  -1   40.60    5.50
   7 -16   1   23.70    4.80
   7 -16   1   37.60    5.20
  -8  16  -1   63.69    9.80
  -8  16  -1   59.99    7.80
   8 -16   1   58.99    8.20
   8 -16   1   64.69    7.30
  -9  16  -1   34.80    6.30
  -9  16  -1   25.90    4.80
   9 -16   1   28.80    5.00
 -10  16  -1   17.50    4.20
 -10  16  -1   12.40    5.30
  10 -16   1   13.90    4.20
  10 -16   1   15.30    5.00
 -11  16  -1   19.40    5.00
 -11  16  -1   20.50    4.50
  11 -16   1   34.30    5.60
  11 -16   1   19.40    4.40
 -12  16  -1   99.59    9.50
 -12  16  -1   84.99    7.80
  12 -16   1   87.59    7.60
  12 -16   1   72.09    8.40
  -1  15  -1    4.90    3.70
  -1  15  -1    3.50    4.40
  -2  15  -1   90.39    9.90
  -2  15  -1   83.49    8.10
   2 -15   1   77.39    7.60
  -3  15  -1  110.79   12.00
  -3  15  -1  125.69   10.00
   3 -15   1  120.49   11.40
   3 -15   1  131.99    9.60
  -4  15  -1   -0.70    4.00
  -4  15  -1    1.20    5.60
   4 -15   1    3.40    4.30
   4 -15   1   -6.40    4.60
  -5  15  -1   76.79   11.60
  -5  15  -1   68.69    8.80
   5 -15   1   63.59    8.40
   5 -15   1   64.29    9.60
  -6  15  -1   42.90    6.70
  -6  15  -1   39.40    8.10
   6 -15   1   46.50    7.20
   6 -15   1   44.30    6.50
  -7  15  -1   78.49   12.10
  -7  15  -1   96.09   10.00
   7 -15   1   92.19   10.50
   7 -15   1   92.09    9.90
  -8  15  -1   95.29   12.70
  -8  15  -1  110.29   10.30
   8 -15   1   76.59   10.50
   8 -15   1   98.09    9.90
  -9  15  -1   57.29    8.20
  -9  15  -1   46.80    7.90
   9 -15   1   52.89    8.20
   9 -15   1   39.20    6.60
 -10  15  -1   83.19    9.20
  10 -15   1   70.69    9.80
  10 -15   1   72.89    8.80
 -11  15  -1    0.50    4.20
 -11  15  -1    1.50    5.20
  11 -15   1    2.60    4.10
  11 -15   1    7.90    4.70
 -12  15  -1  135.29    9.90
 -12  15  -1  131.29   11.50
  12 -15   1  117.29   11.50
  12 -15   1   97.59    8.90
 -13  15  -1   79.29    8.20
 -13  15  -1   85.79    9.60
  13 -15   1   68.09    7.60
  13 -15   1   59.79    9.90
 -14  15  -1    6.30    4.20
  14 -15   1    2.20    3.50
   1  14  -1    7.20    4.30
   1  14  -1   10.00    3.70
   0  14  -1    3.70    4.80
   0  14  -1   -1.80    3.70
   0 -14   1    0.10    4.00
  -1  14  -1   41.40    5.90
  -1  14  -1   32.00    6.80
   1 -14   1   42.80    6.00
  -2  14  -1   16.30    6.50
  -2  14  -1   15.50    5.00
   2 -14   1    9.40    5.00
   2 -14   1   17.20    6.70
  -3  14  -1   80.79   12.40
  -3  14  -1   74.39    9.40
   3 -14   1   47.70    7.80
   3 -14   1   48.30    7.20
  -4  14  -1   -1.80    6.70
  -4  14  -1    4.50    5.00
   4 -14   1   -1.80    5.70
   4 -14   1   -0.30    4.90
  -5  14  -1   -1.00    6.80
  -5  14  -1    5.20    5.20
   5 -14   1   -0.80    5.20
  -6  14  -1  145.89   13.10
  -6  14  -1  138.89   15.30
   6 -14   1  146.79   13.10
  -7  14  -1   94.49   13.70
  -7  14  -1  106.09   11.10
   7 -14   1   95.29   11.40
  -8  14  -1  157.78   16.00
  -8  14  -1  140.39   12.50
   8 -14   1  130.99   13.90
   8 -14   1  138.39   12.50
  -9  14  -1   -5.40    6.30
  -9  14  -1   -5.00    4.90
   9 -14   1    4.20    5.20
   9 -14   1   -1.20    5.00
 -10  14  -1   -0.50    4.90
 -10  14  -1    4.10    6.00
  10 -14   1    1.90    5.60
  10 -14   1    6.40    5.00
 -11  14  -1   71.49    9.30
 -11  14  -1   60.49    8.80
  11 -14   1   48.30    7.90
  11 -14   1   58.89    9.10
 -12  14  -1   15.90    5.00
 -12  14  -1   15.20    6.40
  12 -14   1   17.20    5.00
  12 -14   1   16.10    6.60
 -13  14  -1   60.09    7.90
 -13  14  -1   40.00    7.20
  13 -14   1   32.40    5.70
  13 -14   1   36.00    7.60
 -14  14  -1    0.40    4.40
 -14  14  -1   -0.30    4.60
  14 -14   1    5.10    4.00
 -15  14  -1    4.10    4.30
  15 -14   1    7.50    3.80
   2  13  -1   90.39   10.10
   2  13  -1   73.29    8.00
  -2 -13   1   95.69    8.40
   1  13  -1   46.10    7.40
   1  13  -1   42.30    5.80
  -1 -13   1   39.10    6.10
   0  13  -1   73.29    9.90
   0  13  -1   88.79    9.20
   0 -13   1   84.09    9.80
  -1  13  -1    9.30    5.10
  -1  13  -1   -0.20    6.90
   1 -13   1    4.20    5.30
   1 -13   1   -1.20    7.00
  -2  13  -1    7.00    7.10
  -2  13  -1   11.00    5.40
   2 -13   1   12.90    5.90
  -3  13  -1  146.69   13.20
  -3  13  -1  164.28   16.70
   3 -13   1  154.78   13.90
  -4  13  -1  138.29   16.50
  -4  13  -1  125.59   13.20
   4 -13   1  131.09   13.30
  -5  13  -1   42.30    9.50
  -5  13  -1   42.80    7.90
   5 -13   1   31.40    7.50
   5 -13   1   26.10    9.10
  -6  13  -1   -0.60    7.90
  -6  13  -1   -2.10    5.70
   6 -13   1   15.40    6.40
   6 -13   1   12.90    7.80
  -7  13  -1   20.40    8.20
  -7  13  -1   24.70    6.70
   7 -13   1    9.90    6.20
   7 -13   1   12.10    7.40
  -8  13  -1   32.80    6.90
  -8  13  -1   22.60    8.20
   8 -13   1   11.20    8.20
   8 -13   1   23.70    6.80
  -9  13  -1  124.29   12.80
  -9  13  -1  127.89   15.60
   9 -13   1  141.09   14.00
   9 -13   1  149.79   13.60
 -10  13  -1  151.28   15.40
 -10  13  -1  130.29   12.40
  10 -13   1  109.99   12.60
  10 -13   1  128.29   13.60
 -11  13  -1   10.40    5.30
 -11  13  -1    6.50    6.40
  11 -13   1    3.10    5.40
  11 -13   1    5.10    7.00
 -12  13  -1    6.80    5.10
 -12  13  -1    1.00    6.00
  12 -13   1    6.30    7.00
  12 -13   1    6.20    5.20
 -13  13  -1   78.19   11.30
 -13  13  -1   74.29    9.10
  13 -13   1   66.59    9.80
  13 -13   1   76.79   10.50
 -14  13  -1   39.70    6.80
 -14  13  -1   40.00    5.80
  14 -13   1   34.80    6.10
 -15  13  -1   72.09    9.20
  15 -13   1   89.29    8.90
   4  12  -1   87.49    7.80
   4  12  -1   97.59    9.50
  -4 -12   1   81.99    7.80
   3  12  -1  126.69   11.70
   3  12  -1  120.19    9.50
  -3 -12   1  111.79    9.70
   2  12  -1   11.70    6.10
   2  12  -1    8.00    4.30
  -2 -12   1   18.70    5.40
   1  12  -1    3.60    6.50
  -1 -12   1    0.20    5.00
   0  12  -1  153.48   16.30
   0 -12   1  160.08   13.80
  -1  12  -1  148.59   16.20
   1 -12   1  127.19   13.40
  -2  12  -1   75.19   11.40
  -2  12  -1   90.19   11.00
   2 -12   1   94.89   12.20
   2 -12   1   77.49   11.20
   2 -12   1   80.99   11.00
  -3  12  -1    9.50    5.90
  -3  12  -1   10.50    8.60
   3 -12   1    6.60    8.30
   3 -12   1   14.60    5.80
   3 -12   1   10.20    7.20
   3 -12   1    9.70    6.90
  -4  12  -1   34.30    7.90
  -4  12  -1   22.60    9.10
   4 -12   1   29.70    6.50
   4 -12   1   17.10    7.10
   4 -12   1   28.50    7.10
  -5  12  -1   14.10    8.70
  -5  12  -1   13.50    6.70
   5 -12   1    5.90    6.60
   5 -12   1    8.40    6.00
  -6  12  -1   13.70    6.70
  -6  12  -1    0.30    8.40
   6 -12   1    6.80    6.80
   6 -12   1    4.80    5.80
  -7  12  -1   14.20    6.70
  -7  12  -1   15.10    9.10
   7 -12   1   24.20    7.60
   7 -12   1   12.90    6.60
   8 -12   1   48.50    8.70
   8 -12   1   41.80    8.10
  -9  12  -1   16.10    8.20
  -9  12  -1    6.00    6.10
   9 -12   1   10.30    6.40
   9 -12   1   12.60    7.10
 -10  12  -1   98.59   13.90
 -10  12  -1  106.19   11.40
  10 -12   1   81.59   13.00
  10 -12   1   65.39   10.70
 -11  12  -1  143.29   12.80
 -11  12  -1  137.99   15.10
  11 -12   1  127.59   15.40
  11 -12   1  114.89   12.80
 -12  12  -1  150.58   15.30
 -12  12  -1  168.78   13.40
  12 -12   1  156.88   16.90
  12 -12   1  166.08   14.40
 -13  12  -1    3.40    6.00
 -13  12  -1    0.80    5.00
  13 -12   1    1.30    5.10
  13 -12   1    1.40   10.30
 -14  12  -1    0.70    5.30
 -14  12  -1    5.80    5.00
 -14  12  -1   28.10   14.10
  14 -12   1   15.30    5.30
 -15  12  -1  125.39   15.60
 -15  12  -1  122.89   11.40
  15 -12   1  120.09   10.80
 -16  12  -1   76.59    8.00
 -16  12  -1   52.29   14.90
  16 -12   1   78.89    7.80
   5  11  -1   19.40    5.00
   5  11  -1   21.30    4.30
  -5 -11   1   18.60    4.70
   4  11  -1    2.80    5.30
  -4 -11   1    0.70    4.40
   3  11  -1   55.89    8.00
   3  11  -1   48.80    8.60
  -3 -11   1   66.59    9.60
   2  11  -1    4.40    6.50
   2  11  -1   15.90    5.30
  -2 -11   1    4.80    5.80
   1  11  -1  115.49   14.70
   1  11  -1  131.59   11.70
  -1 -11   1  127.89   13.50
   0  11  -1  107.69   11.80
   0  11  -1  138.89   15.90
   0 -11   1  111.09   13.10
   0 -11   1   95.79   13.10
  -1  11  -1  458.25   26.30
  -1  11  -1  488.75   30.00
   1 -11   1  466.45   26.60
   1 -11   1  469.85   25.70
   1 -11   1  487.25   27.80
  -2  11  -1  118.29   15.90
   2 -11   1  134.99   11.20
   2 -11   1  110.89   11.80
   2 -11   1   94.19   16.30
   2 -11   1  109.59   13.40
  -3  11  -1  105.39   12.70
  -3  11  -1  105.59   16.30
   3 -11   1   90.39   15.40
   3 -11   1  112.79   13.40
   3 -11   1  101.49    9.90
   3 -11   1  126.29   11.00
  -4  11  -1  430.36   29.20
  -4  11  -1  476.15   26.90
   4 -11   1  482.65   25.30
   4 -11   1  475.95   27.80
   4 -11   1  497.85   25.40
   4 -11   1  434.86   28.00
  -5  11  -1  286.47   21.50
  -5  11  -1  268.77   19.00
   5 -11   1  272.07   19.60
   5 -11   1  240.28   16.20
   5 -11   1  265.87   16.50
  -6  11  -1  287.07   22.20
  -6  11  -1  285.27   18.90
   6 -11   1  252.27   16.60
   6 -11   1  251.87   19.40
  -7  11  -1  483.35   27.00
  -7  11  -1  460.85   29.40
   7 -11   1  445.06   25.30
   7 -11   1  484.95   27.70
  -8  11  -1  115.79   12.90
  -8  11  -1  110.49   15.10
   8 -11   1  100.09   11.20
   8 -11   1   98.09   13.90
  -9  11  -1   86.09   11.80
  -9  11  -1  104.09   12.40
   9 -11   1   93.69   11.70
   9 -11   1   92.29   12.90
 -10  11  -1  478.45   26.70
 -10  11  -1  475.35   28.80
  10 -11   1  488.35   27.90
  10 -11   1  478.05   28.70
  10 -11   1  410.96   26.90
 -11  11  -1  110.09   12.00
 -11  11  -1  113.79   14.30
  11 -11   1  119.99   13.10
  11 -11   1  142.29   18.10
  11 -11   1   78.49   11.60
 -12  11  -1  138.09   12.50
 -12  11  -1  133.99   14.60
  12 -11   1   96.69   13.20
  12 -11   1  120.39   13.30
  12 -11   1   97.69   16.00
 -13  11  -1   -1.70    5.30
 -13  11  -1   14.40    6.80
  13 -11   1    5.50    5.80
 -14  11  -1   74.79   14.80
 -14  11  -1   67.99    9.20
 -14  11  -1   45.80    7.60
  14 -11   1   40.10    7.20
 -15  11  -1    7.80    5.20
 -15  11  -1    8.80   10.80
  15 -11   1   -3.00    4.60
 -16  11  -1   31.70    5.50
 -16  11  -1   25.70   10.40
  16 -11   1   23.10    5.20
   6  10  -1   13.60    5.10
  -6 -10   1   14.30    4.50
   5  10  -1   74.39    8.10
   5  10  -1   89.09   10.80
  -5 -10   1   73.99    9.20
   4  10  -1    4.70    4.20
   4  10  -1   -8.00    5.60
  -4 -10   1   -4.80    5.10
   3  10  -1  142.59   11.70
   3  10  -1  143.59   14.90
  -3 -10   1  114.59   12.90
   2  10  -1   86.59   10.00
   2  10  -1   55.59   10.20
   2  10  -1  103.89   15.50
  -2 -10   1   72.59   11.60
   1  10  -1  441.66   30.80
   1  10  -1  476.75   29.00
   1  10  -1  500.25   26.20
  -1 -10   1  453.65   27.50
   0  10  -1  112.49   13.60
   0  10  -1  131.79   12.50
   0 -10   1  118.99   14.20
   0 -10   1  120.79   11.30
   0 -10   1  122.99   12.10
  -1  10  -1  868.11   44.50
  -1  10  -1  858.51   47.10
   1 -10   1  901.81   46.20
   1 -10   1  927.31   43.60
   1 -10   1  929.01   43.80
  -2  10  -1  318.67   19.40
  -2  10  -1  310.47   22.60
   2 -10   1  294.37   17.30
   2 -10   1  269.27   22.00
   2 -10   1  298.67   17.30
   2 -10   1  279.87   20.30
  -3  10  -1    3.10    9.20
   3 -10   1   17.60    7.60
   3 -10   1   19.50    4.70
   3 -10   1    8.30    9.30
   3 -10   1   17.70    5.00
  -4  10  -1  173.18   16.00
  -4  10  -1  211.68   19.00
   4 -10   1  194.28   17.70
   4 -10   1  186.28   12.70
   4 -10   1  176.28   16.20
   4 -10   1  197.48   12.30
  -5  10  -1   92.69   13.40
  -5  10  -1   83.49   12.20
   5 -10   1   70.49   10.00
   5 -10   1   80.09   13.50
   5 -10   1   88.39    8.50
   5 -10   1   78.69    7.90
  -6  10  -1  187.08   18.80
  -6  10  -1  160.88   15.70
   6 -10   1  181.28   16.20
   6 -10   1  183.08   12.40
   6 -10   1  193.08   12.50
  -7  10  -1   11.50    8.70
  -7  10  -1   19.60    7.10
   7 -10   1   13.90    7.90
   7 -10   1   14.80    4.40
   7 -10   1    0.20    6.90
  -8  10  -1  252.27   21.90
  -8  10  -1  297.47   19.70
   8 -10   1  327.37   21.70
   8 -10   1  320.57   18.10
  -9  10  -1  880.31   44.30
  -9  10  -1  908.51   46.30
   9 -10   1  822.82   43.30
   9 -10   1  909.81   45.80
 -10  10  -1  107.89   12.50
 -10  10  -1  101.29   14.90
  10 -10   1   96.19   12.50
  10 -10   1  132.19   16.10
  10 -10   1   98.79   13.60
 -11  10  -1  473.35   26.00
 -11  10  -1  479.75   28.60
  11 -10   1  457.95   27.50
  11 -10   1  435.06   29.20
  11 -10   1  424.46   27.90
 -12  10  -1   73.29   11.00
 -12  10  -1   63.79    9.90
  12 -10   1   81.89   12.60
  12 -10   1  110.99   16.60
 -13  10  -1  124.49   12.20
 -13  10  -1  141.19   16.80
 -13  10  -1  111.69   14.40
  13 -10   1  135.19   14.00
 -14  10  -1  -12.30   11.10
 -14  10  -1   -7.10    5.30
 -14  10  -1   -0.10    5.90
  14 -10   1    2.20    5.50
 -15  10  -1   78.49   10.50
 -15  10  -1   90.29   12.20
  15 -10   1   81.39   10.40
 -16  10  -1   14.60    9.00
 -16  10  -1   16.40    5.20
  16 -10   1   19.70    5.50
   7   9  -1   36.90    6.30
  -7  -9   1   34.30    5.40
   6   9  -1   51.69    7.70
   6   9  -1   35.30    5.40
  -6  -9   1   55.19    8.90
   5   9  -1    7.70    6.00
   5   9  -1   -6.40    3.90
  -5  -9   1   -1.20    5.30
   4   9  -1  110.79   14.40
   4   9  -1  118.99   11.00
  -4  -9   1  115.69   13.10
   3   9  -1   15.40    7.50
   3   9  -1   18.50   11.20
   3   9  -1   11.90    5.40
  -3  -9   1    7.70    6.40
   2   9  -1  118.19   16.00
   2   9  -1  126.19   15.50
   2   9  -1   96.69   11.20
  -2  -9   1   92.39   13.10
   1   9  -1  910.51   47.70
   1   9  -1  876.11   44.30
   1   9  -1  904.31   47.10
  -1  -9   1  892.61   46.30
  -1  -9   1  924.41   43.50
  -1  -9   1  883.21   43.20
   0   9  -1  128.29   12.90
   0   9  -1  134.39   14.30
   0   9  -1  129.69   16.00
   0  -9   1  114.39   13.90
   0  -9   1  143.19   10.40
   0  -9   1  129.29   10.50
  -1   9  -1 1180.28   57.09
  -1   9  -1 1144.89   54.69
   1  -9   1 1133.79   53.29
   1  -9   1 1174.78   53.39
   1  -9   1 1040.80   55.49
   2  -9   1    1.80    7.50
   2  -9   1    4.30    3.80
   2  -9   1    1.40    6.70
   2  -9   1    1.00    3.10
   3  -9   1   84.69    7.20
   3  -9   1   71.89    7.40
   4  -9   1  179.78   14.10
   4  -9   1  198.68   12.50
   4  -9   1  211.58   12.20
   5  -9   1  231.08   12.50
   5  -9   1  182.98   12.40
   5  -9   1  174.28   13.80
   6  -9   1   60.19    9.20
   6  -9   1   68.59    6.60
   6  -9   1   52.89    6.80
  -7   9  -1    1.00    7.10
  -7   9  -1   16.90   10.90
   7  -9   1   -7.80    7.80
   7  -9   1    5.00    3.50
   7  -9   1    4.10    5.40
  -8   9  -1 1118.69   57.59
  -8   9  -1 1111.29   55.79
   8  -9   1 1174.58   54.79
   8  -9   1 1149.69   55.69
   8  -9   1 1233.08   57.59
  -9   9  -1  131.39   15.20
  -9   9  -1  138.99   13.40
   9  -9   1  151.08   14.90
   9  -9   1  119.79   13.40
   9  -9   1  125.39   11.00
 -10   9  -1  856.01   42.20
 -10   9  -1  845.92   44.20
  10  -9   1  820.42   44.50
  10  -9   1  797.52   41.60
  10  -9   1  805.62   43.10
  10  -9   1  896.91   44.10
 -11   9  -1  109.89   12.30
 -11   9  -1  103.49   13.70
  11  -9   1   66.69   14.20
  11  -9   1   99.29   13.60
  11  -9   1   86.49   11.70
  11  -9   1   97.29   15.40
 -12   9  -1    5.80    7.50
 -12   9  -1    5.20    6.10
  12  -9   1   -0.60   13.30
  12  -9   1    9.90    7.40
 -13   9  -1  127.99   13.90
 -13   9  -1  129.29   12.30
 -13   9  -1  154.58   20.40
  13  -9   1  124.59   14.20
  13  -9   1   69.79   19.80
 -14   9  -1    0.70    5.90
 -14   9  -1   -3.60    5.70
 -14   9  -1   -0.80   10.50
  14  -9   1    2.00    6.30
 -15   9  -1   34.90    9.70
 -15   9  -1   49.00    7.30
  15  -9   1   36.90    7.00
 -16   9  -1   43.50    6.50
 -16   9  -1   30.90    8.80
  16  -9   1   54.49    8.80
   8   8  -1   54.59    6.80
   8   8  -1   61.29    8.50
  -8  -8   1   64.59    8.10
   7   8  -1   90.89    8.60
   7   8  -1   90.89   11.50
  -7  -8   1  110.69   11.00
   6   8  -1  138.89   14.30
   6   8  -1  129.19   10.80
  -6  -8   1  134.59   13.20
   5   8  -1   34.00    6.40
   5   8  -1   25.90    7.90
   5   8  -1   28.60   13.50
   5   8  -1   28.70    5.50
  -5  -8   1   34.70    7.70
   4   8  -1   26.90    5.90
   4   8  -1    6.10    9.20
   4   8  -1   12.50    7.50
   4   8  -1   25.30    5.10
  -4  -8   1   33.80    7.90
   3   8  -1  126.29   11.40
   3   8  -1  118.59   14.90
   3   8  -1  115.49    9.80
   3   8  -1  132.89   15.50
  -3  -8   1   99.89   13.50
   2   8  -1  247.98   19.90
   2   8  -1  253.57   17.70
   2   8  -1  282.87   21.20
   2   8  -1  263.17   16.00
  -2  -8   1  278.67   18.00
  -2  -8   1  295.17   16.10
  -2  -8   1  316.87   20.20
   1   8  -1 1092.19   54.19
   1   8  -1 1136.99   56.49
   1   8  -1 1052.69   52.99
   1   8  -1 1111.09   56.49
  -1  -8   1 1077.39   55.69
  -1  -8   1 1259.87   53.19
  -1  -8   1 1145.89   52.89
  -1  -8   1 1190.18   53.89
   0   8  -1  379.46   22.10
   0   8  -1  346.87   19.00
   0  -8   1  361.16   18.90
   0  -8   1  340.47   19.30
  -1   8  -1  439.76   24.40
   1  -8   1  397.56   23.30
   1  -8   1  439.06   21.80
   1  -8   1  427.96   22.10
   2  -8   1   57.99    8.40
   2  -8   1   63.29    6.60
   3  -8   1  432.16   23.30
   3  -8   1  453.25   22.50
   4  -8   1   40.90    5.50
   4  -8   1   41.40    6.90
   5  -8   1  460.05   24.20
   5  -8   1  462.55   23.60
   5  -8   1  475.05   23.30
   6  -8   1   69.79    6.80
   6  -8   1   49.40    7.40
   6  -8   1   59.29    5.70
   7  -8   1  446.66   24.20
   7  -8   1  465.55   23.20
   8  -8   1  378.66   19.90
   8  -8   1  364.06   20.90
  -9   8  -1 1087.49   52.59
  -9   8  -1 1154.98   54.59
   9  -8   1 1065.49   52.39
   9  -8   1 1088.49   54.29
   9  -8   1 1040.20   51.29
 -10   8  -1  290.87   18.70
 -10   8  -1  289.67   20.90
  10  -8   1  284.97   21.00
  10  -8   1  264.17   18.90
  10  -8   1  282.07   18.10
 -11   8  -1  131.59   14.90
 -11   8  -1  111.29   12.40
  11  -8   1   97.99   14.30
  11  -8   1  106.09   15.80
  11  -8   1  118.59   15.70
 -12   8  -1   32.20    8.40
 -12   8  -1   26.70    7.00
  12  -8   1   21.40    8.20
  12  -8   1   24.20   13.70
  12  -8   1   21.50   13.40
 -13   8  -1   31.40   11.30
 -13   8  -1   23.90    6.40
 -13   8  -1   33.80    8.20
  13  -8   1   34.00    8.30
  13  -8   1   18.90   18.80
 -14   8  -1  153.28   17.80
 -14   8  -1  115.39   12.10
 -14   8  -1  131.69   14.10
  14  -8   1  149.99   15.00
 -15   8  -1  119.19   15.20
 -15   8  -1   88.29   10.90
  15  -8   1   76.89   11.40
 -16   8  -1   69.99    8.70
 -16   8  -1   59.69    9.50
  16  -8   1   57.49    7.90
   9   7  -1   35.20    6.10
   9   7  -1   38.60    4.90
  -9  -7   1   53.99    7.70
   8   7  -1   93.49    8.50
   8   7  -1   84.19   10.90
  -8  -7   1   89.79   10.50
   7   7  -1   70.59    8.80
   7   7  -1   92.29   12.50
  -7  -7   1   84.39   11.40
   6   7  -1    8.30    4.90
   6   7  -1    3.80   11.30
   6   7  -1    9.70    4.60
   6   7  -1   14.70    7.30
  -6  -7   1    3.70    6.30
   5   7  -1    3.20    7.30
   5   7  -1    6.20    5.20
   5   7  -1   26.00   10.40
   5   7  -1    9.30    4.50
  -5  -7   1   23.30    7.60
   4   7  -1  467.95   28.60
   4   7  -1  445.36   24.90
   4   7  -1  495.95   28.50
   4   7  -1  444.56   24.00
  -4  -7   1  453.05   27.50
   3   7  -1   13.00    7.00
   3   7  -1   18.30    6.20
   3   7  -1   12.10    4.00
   3   7  -1   14.80    8.30
  -3  -7   1   19.30    6.30
  -3  -7   1   -3.70    9.00
  -3  -7   1    2.60    4.60
  -3  -7   1   10.10    7.50
   2   7  -1    2.80   10.40
   2   7  -1    2.40    3.40
   2   7  -1    2.00    5.30
  -2  -7   1    1.10    4.50
  -2  -7   1   -2.00    7.10
  -2  -7   1   11.40    3.70
  -2  -7   1    0.10    7.40
  -2  -7   1   -0.70    4.60
   1   7  -1  423.46   24.00
   1   7  -1  376.96   21.20
  -1  -7   1  427.56   21.70
  -1  -7   1  432.66   21.20
  -1  -7   1  432.46   23.50
   0   7  -1   22.20    5.10
   0   7  -1   33.80    4.70
   0  -7   1   36.40    5.40
   0  -7   1   35.20    6.10
   0  -7   1   35.60    5.30
  -1   7  -1  306.57   17.40
  -1   7  -1  334.77   19.10
   1  -7   1  348.37   18.60
   1  -7   1  341.87   17.30
   1  -7   1  337.87   17.50
   2  -7   1  347.87   18.90
   2  -7   1  360.26   18.10
   3  -7   1 1312.27   61.49
   3  -7   1 1350.86   60.99
   4  -7   1 1282.27   59.49
   4  -7   1 1287.37   58.99
   5  -7   1  388.66   20.60
   5  -7   1  420.96   19.90
   5  -7   1  384.16   20.20
   6  -7   1  314.77   17.30
   6  -7   1  341.97   16.80
   6  -7   1  323.37   17.70
   7  -7   1   27.30    4.90
   7  -7   1   29.40    4.50
   8  -7   1  411.66   21.10
   8  -7   1  414.66   22.30
  -9   7  -1    8.60    6.70
  -9   7  -1    4.80    8.00
   9  -7   1    0.00    4.40
   9  -7   1    4.50    4.10
   9  -7   1    0.50    8.00
 -10   7  -1    7.40    7.40
 -10   7  -1   18.80    6.90
  10  -7   1   13.00    8.30
  10  -7   1    7.30    7.60
  10  -7   1    5.40    5.90
  10  -7   1   10.30    6.20
 -11   7  -1  487.55   26.00
 -11   7  -1  422.26   27.80
  11  -7   1  464.45   28.10
  11  -7   1  440.36   27.30
  11  -7   1  461.05   29.60
 -12   7  -1   18.60    6.60
 -12   7  -1   21.40    7.60
 -12   7  -1   12.00   10.10
  12  -7   1   11.60    8.10
  12  -7   1   10.30   14.20
  12  -7   1    6.50   10.60
 -13   7  -1   10.70    6.40
 -13   7  -1   11.10    7.10
 -13   7  -1   19.30   10.30
  13  -7   1  -10.10   14.70
  13  -7   1   12.70    8.10
 -14   7  -1   80.79   12.00
 -14   7  -1   87.69   12.50
  14  -7   1   80.49   13.30
 -15   7  -1   81.39   11.10
 -15   7  -1  109.49   15.00
  15  -7   1  103.59   12.80
 -16   7  -1   35.80    6.40
 -16   7  -1   39.60    8.00
  16  -7   1   39.70    7.10
  16  -7   1   47.20    6.70
  10   6  -1   23.90    5.30
 -10  -6   1   17.30    4.80
   9   6  -1   45.10    7.10
   9   6  -1   50.59    7.60
  -9  -6   1   57.99    8.10
   8   6  -1  138.79   10.60
   8   6  -1  139.29   13.70
   8   6  -1  110.29   10.70
  -8  -6   1  141.29   13.50
   7   6  -1    4.50    4.50
   7   6  -1    5.40   10.90
   7   6  -1    9.00    4.60
   7   6  -1   10.50    6.80
  -7  -6   1   13.60    6.70
   6   6  -1    9.00    7.10
   6   6  -1    6.10    8.40
   6   6  -1    5.10    4.20
   6   6  -1    8.40    5.10
  -6  -6   1    3.90    7.40
   5   6  -1  227.18   15.80
   5   6  -1  244.68   14.90
   5   6  -1  252.27   19.70
   5   6  -1  286.77   19.70
  -5  -6   1  264.97   19.80
   4   6  -1  169.78   13.20
   4   6  -1  166.08   14.80
   4   6  -1  175.58   16.30
   4   6  -1  159.48   11.20
  -4  -6   1  192.48   13.60
  -4  -6   1  177.38   16.70
   3   6  -1   75.99    7.20
   3   6  -1   74.99    9.00
  -3  -6   1   67.39    9.10
  -3  -6   1   54.99    7.80
  -3  -6   1   69.89    6.50
  -3  -6   1   62.29    8.10
   2   6  -1   60.69    6.50
   2   6  -1   64.49    7.80
  -2  -6   1   54.99    6.30
  -2  -6   1   41.80    6.60
  -2  -6   1   52.79    6.30
   1   6  -1  360.16   18.80
   1   6  -1  325.37   16.80
  -1  -6   1  303.37   16.80
  -1  -6   1  310.67   17.90
  -1  -6   1  313.47   16.50
   0   6  -1   51.99    6.50
   0   6  -1   45.30    8.80
   0  -6   1   49.60    5.20
   0  -6   1   50.49    6.30
   0  -6   1   57.59    5.10
  -1   6  -1   19.20    3.90
   1  -6   1   23.00    3.50
   1  -6   1   15.60    3.60
   1  -6   1   23.60    3.40
   2  -6   1  709.63   33.50
   2  -6   1  724.43   34.20
   3  -6   1 3394.46  151.78
   3  -6   1 3389.96  151.38
   4  -6   1  718.73   34.50
   4  -6   1  739.83   34.30
   5  -6   1   13.20    3.20
   5  -6   1   22.20    3.20
   5  -6   1   18.60    3.40
   6  -6   1   47.60    5.40
   6  -6   1   54.49    5.60
   6  -6   1   51.09    4.40
   7  -6   1  364.16   17.90
   7  -6   1  346.67   18.90
   8  -6   1   70.59    6.10
   8  -6   1   56.09    7.00
   9  -6   1   76.49    8.00
   9  -6   1   75.69    8.70
 -10   6  -1  171.88   16.30
 -10   6  -1  154.28   14.40
  10  -6   1  193.28   12.70
  10  -6   1  188.88   17.40
  10  -6   1  198.38   18.00
  10  -6   1  170.78   14.10
 -11   6  -1  258.37   17.40
 -11   6  -1  229.58   22.60
 -11   6  -1  250.17   19.90
  11  -6   1  264.97   20.60
  11  -6   1  257.47   23.70
  11  -6   1  224.98   15.00
  11  -6   1  249.58   18.70
 -12   6  -1    5.80    7.60
 -12   6  -1   17.40    6.50
 -12   6  -1   15.40   10.20
  12  -6   1   14.40    8.70
  12  -6   1   13.50   14.90
  12  -6   1   21.70   10.20
 -13   6  -1    5.80    8.70
 -13   6  -1    8.40    6.80
 -13   6  -1   16.40    7.00
  13  -6   1   19.70    8.80
  13  -6   1    5.80   15.00
 -14   6  -1  136.29   16.10
 -14   6  -1  131.59   13.90
  14  -6   1  144.29   15.60
 -15   6  -1   47.50    7.30
 -15   6  -1   49.99    9.10
  15  -6   1   56.69    8.90
 -16   6  -1   18.50    5.50
 -16   6  -1   14.40    7.70
 -16   6  -1   17.00    6.30
  16  -6   1   10.80    5.80
  16  -6   1    9.60    5.40
  11   5  -1   16.30    4.70
 -11  -5   1   30.60    5.10
  10   5  -1   90.39   10.50
  10   5  -1   76.69   16.80
  10   5  -1   76.59    8.20
 -10  -5   1   63.09    9.80
   9   5  -1   -2.60    4.00
   9   5  -1    1.20    5.10
   9   5  -1    2.20   15.70
   9   5  -1   -3.30    5.60
  -9  -5   1    4.10    5.70
   8   5  -1   40.50   13.70
   8   5  -1   23.30    7.10
   8   5  -1   23.70   16.20
   8   5  -1   21.80    5.30
   8   5  -1   32.60    5.90
  -8  -5   1   30.30    8.20
   7   5  -1   11.80    4.40
   7   5  -1   12.30    6.70
   7   5  -1   11.30    9.00
   7   5  -1  -11.40   17.90
   7   5  -1   14.60    5.00
  -7  -5   1    5.00    7.40
   6   5  -1  266.37   19.60
   6   5  -1  243.38   15.50
   6   5  -1  241.18   17.90
   6   5  -1  247.88   14.60
   6   5  -1  257.87   38.30
  -6  -5   1  210.28   18.40
  -6  -5   1  244.38   20.20
  -6  -5   1  229.88   19.70
   5   5  -1   76.69   10.70
   5   5  -1   85.79   12.00
   5   5  -1   69.09    9.50
   5   5  -1   86.39    7.50
  -5  -5   1   71.09   10.60
  -5  -5   1   89.29   13.90
  -5  -5   1   68.09   10.00
  -5  -5   1   57.19   17.20
   4   5  -1  181.58   11.20
   4   5  -1  191.08   13.80
  -4  -5   1  194.58   14.50
  -4  -5   1  175.88   12.30
  -4  -5   1  184.08   12.40
   3   5  -1  445.96   23.70
   3   5  -1  416.16   21.50
  -3  -5   1  433.26   23.50
  -3  -5   1  433.36   21.60
  -3  -5   1  436.66   22.20
   2   5  -1  351.16   19.00
   2   5  -1  335.37   21.20
   2   5  -1  305.57   17.90
  -2  -5   1  379.86   18.00
  -2  -5   1  331.67   18.80
  -2  -5   1  359.56   17.50
   1   5  -1   19.80    4.00
   1   5  -1   15.80    6.30
  -1  -5   1   16.20    3.10
  -1  -5   1   19.50    3.90
  -1  -5   1   22.90    3.70
   0   5  -1   17.50    3.60
   0   5  -1   10.40    5.30
   0  -5   1   20.30    3.30
   0  -5   1   20.80    3.20
   0  -5   1   16.30    3.30
  -1   5  -1 1779.92   83.59
  -1   5  -1 1761.92   83.29
   1  -5   1 1924.11   82.49
   1  -5   1 1860.21   82.89
   2  -5   1  315.77   16.00
   3  -5   1  271.37   13.50
   3  -5   1  258.17   13.70
   4  -5   1 1974.00   88.39
   4  -5   1 1943.91   88.09
   5  -5   1   23.30    3.70
   5  -5   1   23.40    3.50
   5  -5   1   21.10    2.70
   6  -5   1   20.70    3.60
   6  -5   1   21.20    3.00
   7  -5   1  340.57   17.90
   7  -5   1  337.67   16.80
   8  -5   1  398.76   20.50
   8  -5   1  434.26   21.90
   9  -5   1  181.28   14.10
   9  -5   1  180.28   12.00
   9  -5   1  153.88   10.80
 -10   5  -1   57.69    9.40
 -10   5  -1   65.69    9.00
  10  -5   1   81.09   13.60
  10  -5   1   65.99    8.40
  10  -5   1   62.89   11.90
  10  -5   1   68.49    9.60
 -11   5  -1  247.28   22.00
 -11   5  -1  265.57   20.10
 -11   5  -1  268.87   17.50
  11  -5   1  272.67   19.00
  11  -5   1  216.48   20.50
  11  -5   1  244.48   24.80
  11  -5   1  244.68   15.00
 -12   5  -1    3.50    9.00
 -12   5  -1    8.30    6.80
 -12   5  -1    7.40    7.40
  12  -5   1   11.00    9.00
  12  -5   1    4.50    5.20
  12  -5   1   10.10   10.10
 -13   5  -1   25.00   14.10
 -13   5  -1   23.10    7.40
 -13   5  -1   32.50    9.80
  13  -5   1   24.00    9.90
 -14   5  -1    1.20    6.10
 -14   5  -1   -1.00    7.20
  14  -5   1   -4.80    7.70
 -15   5  -1   70.49   11.60
 -15   5  -1   63.49   10.10
 -15   5  -1   87.19   13.00
  15  -5   1   81.79   12.50
 -16   5  -1   22.00    9.70
 -16   5  -1   13.10    5.50
  16  -5   1   25.00    5.40
  16  -5   1   27.60    6.20
  12   4  -1   83.59    8.50
 -12  -4   1   88.19    8.60
  11   4  -1    7.20   12.90
  11   4  -1   10.50    4.80
  11   4  -1    8.60    4.60
 -11  -4   1    3.10    4.70
  10   4  -1    4.30    6.00
  10   4  -1    1.70    5.20
  10   4  -1    4.90   13.50
  10   4  -1    2.00    3.90
 -10  -4   1   -0.20    5.60
   9   4  -1  114.39   10.90
   9   4  -1  122.29   10.20
   9   4  -1  138.89   17.80
   9   4  -1  116.89   13.30
  -9  -4   1  117.59   14.00
   8   4  -1   37.20    5.70
   8   4  -1   29.50   15.70
   8   4  -1   41.90   11.50
   8   4  -1   31.30    5.50
   8   4  -1   17.50    6.80
  -8  -4   1   27.50    8.10
  -8  -4   1   30.60    9.80
   7   4  -1  447.86   25.70
   7   4  -1  424.06   23.10
   7   4  -1  432.56   22.50
   7   4  -1  435.06   27.20
   7   4  -1  409.16   34.40
  -7  -4   1  417.86   26.40
  -7  -4   1  457.15   27.30
  -7  -4   1  437.06   26.40
   6   4  -1  173.18   12.40
   6   4  -1  162.18   15.00
   6   4  -1  174.78   11.10
   6   4  -1  165.38   14.30
  -6  -4   1  189.88   14.00
  -6  -4   1  153.68   17.30
  -6  -4   1  167.88   16.70
  -6  -4   1  150.98   15.70
   5   4  -1  170.58   10.80
   5   4  -1  177.98   13.30
  -5  -4   1  172.88   13.90
  -5  -4   1  186.38   12.30
   4   4  -1   38.30    5.40
   4   4  -1   18.50    9.20
   4   4  -1   39.70    6.30
  -4  -4   1   32.20    4.90
  -4  -4   1   31.60    5.70
  -4  -4   1   29.00    5.10
   3   4  -1 1290.17   57.99
  -3  -4   1 1219.88   56.69
  -3  -4   1 1170.68   57.49
  -3  -4   1 1250.77   56.59
   2   4  -1  614.34   33.20
   2   4  -1  686.13   32.60
  -2  -4   1  687.83   32.40
  -2  -4   1  688.93   31.60
   1   4  -1 1762.12   83.89
   1   4  -1 1701.03   83.39
  -1  -4   1 1891.31   83.39
  -1  -4   1 2000.40   82.79
   0   4  -1  283.17   15.60
   0   4  -1  284.87   14.90
   0  -4   1  296.97   14.20
   0  -4   1  284.57   14.60
  -1   4  -1 1369.46   61.79
  -1   4  -1 1362.36   61.89
   1  -4   1 1367.26   60.99
   1  -4   1 1322.67   61.39
   2  -4   1    8.40    2.00
   3  -4   1 1412.56   63.89
   4  -4   1  282.57   14.20
   5  -4   1 1888.21   86.19
   5  -4   1 1936.21   85.49
   6  -4   1  687.03   32.30
   6  -4   1  673.43   31.30
   7  -4   1 1254.47   56.39
   7  -4   1 1178.48   55.09
   8  -4   1   23.40    5.90
   8  -4   1   44.60    5.00
   8  -4   1   35.00    5.20
   9  -4   1  184.28   12.40
   9  -4   1  160.68   14.40
 -10   4  -1  196.68   19.10
 -10   4  -1  160.58   16.80
 -10   4  -1  160.08   14.60
  10  -4   1  160.48   11.30
  10  -4   1  170.38   13.70
  10  -4   1  180.68   17.70
  10  -4   1  165.28   19.40
 -11   4  -1  458.45   29.00
 -11   4  -1  462.95   27.70
 -11   4  -1  456.55   25.40
  11  -4   1  369.66   31.40
  11  -4   1  470.65   23.10
  11  -4   1  445.66   23.10
  11  -4   1  469.15   27.00
  11  -4   1  442.96   29.50
 -12   4  -1   11.20    7.60
 -12   4  -1   25.90    9.10
 -12   4  -1   34.50   10.50
 -12   4  -1   25.20    7.70
  12  -4   1   36.30    5.70
  12  -4   1   19.70    9.70
  12  -4   1   36.10   11.00
 -13   4  -1   96.29   14.90
 -13   4  -1  114.89   13.90
  13  -4   1  126.69   17.40
 -14   4  -1    0.40    6.90
 -14   4  -1    3.40    6.20
  14  -4   1   -2.50    7.50
 -15   4  -1   -0.80    8.20
 -15   4  -1    7.50    5.90
 -15   4  -1    0.80    6.20
  15  -4   1    9.50    6.80
 -16   4  -1   75.29    9.00
  16  -4   1   73.49    8.50
  16  -4   1   81.79   10.20
  12   3  -1  134.59   19.30
  12   3  -1  118.99   10.60
 -12  -3   1  106.19   10.10
  11   3  -1   55.59   13.80
  11   3  -1   61.79    8.20
  11   3  -1   76.49   10.10
 -11  -3   1   50.39    8.10
  10   3  -1  120.79   12.80
  10   3  -1  105.19   15.70
  10   3  -1  115.69   10.10
  10   3  -1  120.69   11.50
 -10  -3   1  154.68   14.50
   9   3  -1    2.50    4.40
   9   3  -1    1.00   13.30
   9   3  -1   12.00    9.30
   9   3  -1    8.70    4.60
   9   3  -1    6.20    6.10
  -9  -3   1    7.00    6.60
  -9  -3   1    3.60    8.10
   8   3  -1   69.59   16.70
   8   3  -1   84.59    8.40
   8   3  -1  108.19    9.70
   8   3  -1   89.49   13.90
  -8  -3   1  106.39   14.90
  -8  -3   1   73.99   11.90
  -8  -3   1  110.49   18.70
  -8  -3   1  102.59   14.60
   7   3  -1   14.10    4.90
   7   3  -1   15.50    4.20
   7   3  -1   17.50    6.60
   7   3  -1    4.10   17.90
  -7  -3   1   21.90    8.30
  -7  -3   1    6.40    7.20
  -7  -3   1    8.90    6.40
  -7  -3   1   16.50    8.20
   6   3  -1   61.19    6.70
   6   3  -1   63.29    8.80
  -6  -3   1   74.29   10.20
  -6  -3   1   72.09    8.60
   5   3  -1  441.06   21.60
   5   3  -1  441.26   23.50
  -5  -3   1  427.36   23.60
  -5  -3   1  440.86   22.20
  -5  -3   1  435.66   22.60
   4   3  -1 1238.88   56.49
   4   3  -1 1102.09   57.19
  -4  -3   1 1197.58   56.39
  -4  -3   1 1264.67   55.69
   3   3  -1 3283.27  142.89
   3   3  -1 2999.90  143.29
  -3  -3   1 3213.18  142.79
  -3  -3   1 3216.48  142.09
   2   3  -1  304.37   14.70
   2   3  -1  289.37   15.30
  -2  -3   1  257.97   14.40
  -2  -3   1  257.17   13.80
   1   3  -1 1287.77   60.29
   1   3  -1 1275.07   59.99
  -1  -3   1 1353.06   59.99
  -1  -3   1 1362.76   59.49
   0   3  -1   90.89    5.80
   0   3  -1   91.69    6.10
   0  -3   1   85.99    5.50
   0  -3   1   88.09    5.10
  -1   3  -1  121.49    6.30
   1  -3   1   92.89    5.40
   1  -3   1   97.19    5.90
   2  -3   1  129.59    7.10
   3  -3   1   92.19    5.50
   4  -3   1 1279.27   60.19
   4  -3   1 1387.16   59.59
   5  -3   1  288.47   13.90
   5  -3   1  298.17   14.80
   6  -3   1 2907.41  136.19
   6  -3   1 3231.68  137.49
   7  -3   1 1071.49   50.99
   7  -3   1 1179.28   52.79
   7  -3   1 1148.09   53.59
   8  -3   1  396.46   23.20
   8  -3   1  432.16   22.00
   9  -3   1   62.39    7.90
   9  -3   1   71.99   11.60
 -10   3  -1   12.40    7.70
 -10   3  -1   17.40    7.20
 -10   3  -1    8.30    9.10
  10  -3   1   15.70    4.80
  10  -3   1   14.20   10.70
  10  -3   1    2.20   12.20
  10  -3   1    9.40    5.40
 -11   3  -1   91.29   12.20
 -11   3  -1  120.69   15.60
 -11   3  -1  113.89   14.50
 -11   3  -1   99.59   13.10
  11  -3   1  109.89   14.70
  11  -3   1   96.99    9.70
  11  -3   1   90.89   13.30
  11  -3   1   90.19    9.10
 -12   3  -1   -7.20    9.90
 -12   3  -1   14.80    7.50
 -12   3  -1    9.40    7.80
  12  -3   1    2.70    6.50
  12  -3   1   -0.90    9.80
  12  -3   1    7.50    4.70
  12  -3   1   -7.10   10.00
 -13   3  -1  134.19   15.50
 -13   3  -1  139.39   14.60
 -14   3  -1   65.49    8.30
 -14   3  -1   57.29    8.80
 -14   3  -1   43.90   10.50
  14  -3   1   46.70   10.30
 -15   3  -1  119.49   11.60
  15  -3   1  106.29   13.50
  15  -3   1  116.99   10.10
  13   2  -1   76.19    8.60
  13   2  -1   70.69   11.30
 -13  -2   1   75.59    8.80
  12   2  -1   -0.40    9.90
  12   2  -1   14.60    5.40
  12   2  -1   -1.90    5.30
 -12  -2   1   13.50    6.00
  11   2  -1   -5.60   10.60
  11   2  -1   10.10    5.20
  11   2  -1   -6.50    6.90
  11   2  -1   -1.00    4.40
 -11  -2   1   14.00    6.70
 -11  -2   1   -9.70    8.10
  10   2  -1   66.39    8.30
  10   2  -1   84.59   14.50
  10   2  -1   73.09   11.30
  10   2  -1   79.19    9.40
  10   2  -1   68.79   14.20
 -10  -2   1   76.29   10.40
 -10  -2   1   55.39    9.40
   9   2  -1   98.89    8.80
   9   2  -1   91.39   15.00
   9   2  -1   95.29   15.30
   9   2  -1   92.79    9.40
  -9  -2   1  103.39   14.10
  -9  -2   1  111.89   16.20
  -9  -2   1   73.39   12.20
  -9  -2   1  104.19   14.70
   8   2  -1  285.87   15.60
   8   2  -1  283.87   16.30
   8   2  -1  299.87   27.90
   8   2  -1  290.17   19.50
  -8  -2   1  250.67   19.70
  -8  -2   1  258.97   20.50
  -8  -2   1  273.57   20.90
  -8  -2   1  260.17   18.60
   7   2  -1    8.50    4.70
   7   2  -1    4.10    4.80
   7   2  -1    1.40    3.20
  -7  -2   1    6.60    5.70
  -7  -2   1    1.40    8.60
  -7  -2   1   -1.80    4.70
   6   2  -1   45.40    5.80
   6   2  -1   50.29    6.70
   6   2  -1   40.30    9.50
  -6  -2   1   54.99    6.90
  -6  -2   1   60.09    8.20
   5   2  -1  375.06   18.90
   5   2  -1  337.67   17.40
   5   2  -1  333.37   20.90
  -5  -2   1  334.47   19.00
  -5  -2   1  338.17   18.00
   4   2  -1  696.93   32.40
   4   2  -1  639.84   33.00
  -4  -2   1  679.53   32.50
  -4  -2   1  659.93   31.60
   3   2  -1  250.77   15.00
   3   2  -1  264.17   14.40
  -3  -2   1  302.47   14.10
  -3  -2   1  295.07   14.80
   2   2  -1   10.40    2.10
   2   2  -1   10.40    3.00
  -2  -2   1    8.20    1.80
  -2  -2   1   10.80    2.20
   1   2  -1   94.09    6.10
  -1  -2   1  122.79    6.40
   0   2  -1   40.90    3.00
   0   2  -1   37.40    3.20
   0  -2   1   35.60    2.40
   0  -2   1   37.30    2.80
   2  -2   1   35.00    2.60
   3  -2   1   88.59    5.10
   4  -2   1    9.60    1.40
   4  -2   1    7.10    1.80
   5  -2   1  239.78   11.80
   5  -2   1  259.77   12.90
   6  -2   1  635.54   31.50
   6  -2   1  665.63   30.80
   6  -2   1  635.24   29.20
   7  -2   1  331.57   19.20
   7  -2   1  353.66   18.30
   8  -2   1   57.69    6.90
   8  -2   1   51.59    8.30
  -9   2  -1    2.80    7.60
   9  -2   1    2.10    4.00
   9  -2   1   15.40    9.90
   9  -2   1    2.70    4.50
 -10   2  -1  294.57   21.50
 -10   2  -1  283.57   19.40
 -10   2  -1  246.68   18.40
 -10   2  -1  251.27   20.00
  10  -2   1  281.27   24.80
  10  -2   1  306.47   15.90
  10  -2   1  303.77   19.20
  10  -2   1  293.77   16.20
 -11   2  -1  123.09   15.10
 -11   2  -1  111.99   14.60
 -11   2  -1  105.59   14.80
  11  -2   1   80.49   13.60
  11  -2   1  111.69    9.50
  11  -2   1   86.89    9.50
  11  -2   1   94.99   14.50
 -12   2  -1   71.59   10.80
 -12   2  -1   90.49   13.40
 -12   2  -1   75.19   14.00
 -12   2  -1   61.39   18.80
  12  -2   1   67.59    8.40
  12  -2   1   54.29   13.70
  12  -2   1   45.70   11.50
 -13   2  -1    1.20    6.20
 -13   2  -1   -5.50    9.10
 -13   2  -1    7.10    6.70
  13  -2   1   10.30    5.20
  13  -2   1    9.50    9.80
 -14   2  -1   -1.10    7.20
 -14   2  -1   11.40    6.20
  14  -2   1   27.30    8.90
 -15   2  -1   75.59    9.40
  15  -2   1   68.09    9.50
  15  -2   1   84.69    8.30
  14   1  -1    1.90    8.10
  14   1  -1    7.90    4.50
 -14  -1   1    7.90    4.20
  13   1  -1   48.10    9.80
  13   1  -1   30.20    5.60
 -13  -1   1   44.90    7.20
  12   1  -1   -1.00    9.60
  12   1  -1    0.50    5.00
  12   1  -1   -0.40    4.70
 -12  -1   1   -2.30    7.90
 -12  -1   1    2.10    5.50
  11   1  -1  138.29   10.50
  11   1  -1  156.08   17.70
  11   1  -1  108.49   12.20
 -11  -1   1  117.79   14.70
 -11  -1   1  113.39   14.60
  10   1  -1  428.36   31.90
  10   1  -1  448.26   28.60
  10   1  -1  459.15   23.60
  10   1  -1  438.56   23.40
 -10  -1   1  422.86   29.10
 -10  -1   1  440.76   32.30
 -10  -1   1  460.05   28.10
 -10  -1   1  455.35   26.70
   9   1  -1  791.22   46.70
   9   1  -1  829.12   39.30
   9   1  -1  814.52   43.30
   9   1  -1  827.62   39.60
  -9  -1   1  799.02   44.20
  -9  -1   1  795.12   42.40
  -9  -1   1  858.11   42.60
  -9  -1   1  855.11   44.00
   8   1  -1 1139.89   53.39
   8   1  -1 1105.29   50.09
   8   1  -1 1078.69   50.49
  -8  -1   1 1049.00   53.59
  -8  -1   1 1100.89   54.29
  -8  -1   1 1057.09   52.19
  -8  -1   1 1005.70   52.99
   7   1  -1  393.96   26.10
   7   1  -1  409.66   20.30
   7   1  -1  404.46   22.50
  -7  -1   1  409.26   22.00
   6   1  -1  304.07   15.80
   6   1  -1  300.07   17.10
   6   1  -1  271.47   19.20
  -6  -1   1  347.47   17.10
   5   1  -1   18.00    4.80
   5   1  -1   20.60    3.60
  -5  -1   1   18.90    3.40
   4   1  -1 1768.42   82.29
   4   1  -1 1810.22   81.79
  -4  -1   1 1843.32   81.49
   3   1  -1 1296.87   58.69
   3   1  -1 1257.47   58.99
  -3  -1   1 1325.57   58.39
   2   1  -1  120.39    6.70
   2   1  -1  118.89    6.40
  -2  -1   1   96.49    5.90
   0   1  -1 2211.08   98.89
   0   1  -1 2257.17   98.99
   0  -1   1 2174.08   98.89
   0  -1   1 2287.37   98.59
   1  -1   1 2339.47  103.59
   3  -1   1  112.39    6.10
   3  -1   1  115.79    5.40
   4  -1   1 1248.88   57.59
   4  -1   1 1288.37   56.19
   4  -1   1 1255.07   57.09
   5  -1   1 1816.32   79.89
   5  -1   1 1718.73   80.39
   6  -1   1   12.30    2.80
   6  -1   1   12.90    4.50
   7  -1   1  281.07   18.00
   7  -1   1  307.97   16.50
   8  -1   1  427.86   23.10
   8  -1   1  428.06   25.50
  -9   1  -1 1030.90   52.59
  -9   1  -1 1020.80   51.99
  -9   1  -1 1069.29   51.69
   9  -1   1 1117.79   49.30
   9  -1   1  909.61   56.29
   9  -1   1 1122.29   51.79
 -10   1  -1  822.32   44.10
 -10   1  -1  833.32   43.20
 -10   1  -1  796.52   43.10
  10  -1   1  878.01   39.80
  10  -1   1  861.71   40.00
  10  -1   1  819.22   43.40
  10  -1   1  819.92   47.10
 -11   1  -1  476.85   28.40
 -11   1  -1  445.06   32.50
 -11   1  -1  378.06   28.10
 -11   1  -1  469.05   27.40
  11  -1   1  481.05   23.80
  11  -1   1  429.06   31.70
  11  -1   1  471.45   23.70
  11  -1   1  448.86   29.00
 -12   1  -1  128.19   14.20
 -12   1  -1  119.59   14.40
 -12   1  -1  115.79   14.00
  12  -1   1  125.19   20.00
  12  -1   1  112.29   10.00
 -13   1  -1   13.60    6.50
 -13   1  -1   -4.80    7.30
  13  -1   1   -4.70    9.70
  13  -1   1    2.70    4.90
 -14   1  -1   39.60    6.60
  14  -1   1   36.40    5.90
  14  -1   1   46.20    9.60
 -15   1  -1    6.40    4.30
  15  -1   1    2.10    4.10
  15  -1   1   -0.90    7.50
  14   0  -1   -3.50    7.20
  14   0  -1    0.90    4.30
 -14   0   1   -9.40    4.40
  13   0  -1   64.39   10.60
  13   0  -1   73.09    9.40
 -13   0   1   68.29   10.50
  12   0  -1  155.58   11.90
  12   0  -1  123.49   19.20
 -12   0   1  151.28   14.80
 -12   0   1  162.98   15.30
  11   0  -1  116.89    9.90
  11   0  -1  112.89   15.10
  11   0  -1  133.19   18.80
  11   0  -1   92.99   11.40
 -11   0   1   96.99   14.50
 -11   0   1  109.39   13.80
 -11   0   1   61.19   15.30
  10   0  -1   97.39    9.50
  10   0  -1  122.69    9.90
  10   0  -1  111.29   14.80
  10   0  -1  110.39   15.40
 -10   0   1   96.19   14.70
 -10   0   1  106.49   17.90
 -10   0   1   90.69   12.30
 -10   0   1   96.99   14.00
 -10   0   1   60.79   15.30
   9   0  -1  119.39   12.70
   9   0  -1  128.49    9.50
   9   0  -1  134.99   10.30
   9   0  -1  143.69   21.00
  -9   0   1  118.89   14.70
  -9   0   1  136.29   16.40
  -9   0   1  106.29   12.90
  -9   0   1  106.29   12.60
   8   0  -1  334.87   19.20
   8   0  -1  286.17   22.00
   8   0  -1  345.37   17.00
  -8   0   1  302.57   18.70
   7   0  -1   31.70    7.30
   7   0  -1   28.30    4.80
   7   0  -1   33.50    4.20
  -7   0   1   32.90    5.10
   6   0  -1   65.39    8.80
   6   0  -1   57.29    5.80
   5   0  -1   17.30    4.20
   5   0  -1   18.70    3.20
   4   0  -1  265.87   14.40
   4   0  -1  287.17   14.10
   3   0  -1   87.29    5.70
   3   0  -1   82.99    5.30
   3   0  -1   93.29    4.60
   2   0  -1   37.90    2.20
   2   0  -1   34.70    2.60
   2   0  -1   36.30    2.90
   1   0  -1 2171.68   98.59
   1   0  -1 2218.08   98.69
   1   0  -1 2295.07   98.49
   2   0   1   28.50    2.30
   2   0   1   38.60    2.80
   3   0   1   89.59    5.30
   3   0   1   88.29    5.80
   4   0   1  269.37   14.60
   4   0   1  289.77   14.10
   5   0   1   21.50    3.50
   5   0   1   19.20    4.40
   6   0   1   48.30    7.20
   6   0   1   44.60    5.10
  -7   0  -1   37.90    5.60
   7   0   1   28.50    7.90
   7   0   1   34.00    5.40
  -8   0  -1  334.27   19.50
   8   0   1  340.17   19.50
   8   0   1  300.17   23.70
  -9   0  -1  111.99   15.10
  -9   0  -1  126.89   15.40
  -9   0  -1  105.09   12.20
   9   0   1  121.09    9.80
   9   0   1   86.29   16.60
   9   0   1  132.89    8.90
   9   0   1  117.19   12.10
 -10   0  -1  113.59   15.00
 -10   0  -1   82.39   13.90
 -10   0  -1  115.09   14.90
 -10   0  -1   98.09   14.80
  10   0   1   89.39   15.40
  10   0   1  116.89   14.90
  10   0   1  114.59    9.20
  10   0   1  122.19    9.90
 -11   0  -1  107.59   14.00
 -11   0  -1  100.39   14.40
 -11   0  -1  116.59   13.80
 -11   0  -1  110.89   15.90
  11   0   1  114.99   10.00
  11   0   1  105.99   16.90
  11   0   1   76.59   14.70
  11   0   1  102.19    9.50
 -12   0  -1  122.59   15.50
 -12   0  -1  124.49   22.10
 -12   0  -1  147.39   14.70
  12   0   1  160.18   10.90
 -13   0  -1   73.99   10.60
  13   0   1   89.39   12.80
  13   0   1   65.99    9.50
 -14   0  -1   -2.40    4.30
  14   0   1    7.30    9.00
  14   0   1    3.30    4.10
  15  -1  -1    8.70    6.30
  15  -1  -1    7.30    4.60
 -15   1   1    4.30    4.50
  14  -1  -1   30.20    5.80
  14  -1  -1   27.60    8.10
 -14   1   1   47.30    7.50
  13  -1  -1   -0.60    4.90
  13  -1  -1    7.10    8.50
 -13   1   1   -0.20    6.40
 -13   1   1    3.90    6.50
  12  -1  -1  127.59   10.80
  12  -1  -1  133.59   18.50
 -12   1   1  119.69   15.20
 -12   1   1  113.69   13.60
  11  -1  -1  460.95   23.00
  11  -1  -1  474.35   30.30
  11  -1  -1  417.16   28.60
  11  -1  -1  441.06   23.40
 -11   1   1  358.76   29.00
 -11   1   1  442.66   26.50
 -11   1   1  418.56   28.70
 -11   1   1  407.66   30.20
 -11   1   1  460.95   28.00
  10  -1  -1  847.12   39.60
  10  -1  -1  844.92   39.80
  10  -1  -1  838.02   43.50
  10  -1  -1  823.92   45.80
 -10   1   1  823.22   40.40
 -10   1   1  781.12   42.70
 -10   1   1  838.62   43.20
 -10   1   1  837.72   44.40
   9  -1  -1 1048.20   49.60
   9  -1  -1 1044.60   49.20
   9  -1  -1  965.40   54.99
   9  -1  -1 1016.20   51.99
  -9   1   1 1074.29   52.89
  -9   1   1 1090.49   50.59
  -9   1   1 1108.99   51.99
  -9   1   1 1144.69   54.39
   8  -1  -1  398.86   24.60
   8  -1  -1  392.36   19.80
   8  -1  -1  389.26   21.60
   7  -1  -1  320.47   18.60
   7  -1  -1  313.07   17.50
   6  -1  -1   18.10    4.50
   6  -1  -1   13.80    3.10
   5  -1  -1 1822.92   77.59
   5  -1  -1 1723.63   78.79
   5  -1  -1 1678.63   79.19
   4  -1  -1 1247.78   55.59
   4  -1  -1 1237.08   54.79
   4  -1  -1 1196.88   55.89
   3  -1  -1   90.09    4.70
   3  -1  -1   91.09    5.10
   3  -1  -1   87.29    5.40
   1  -1  -1 2208.08   97.59
   0  -1  -1 2196.48   95.49
   0  -1  -1 2024.30   95.29
   0   1   1 2199.18   95.29
   0   1   1 2203.88   95.39
   2   1   1   91.09    5.70
   2   1   1   87.79    5.20
  -3  -1  -1 1355.96   59.19
   3   1   1 1286.07   58.99
   3   1   1 1274.77   59.49
  -4  -1  -1 1881.21   80.19
   4   1   1 1707.33   79.99
   4   1   1 1725.13   80.69
  -5  -1  -1   18.90    3.50
   5   1   1    8.50    5.40
   5   1   1   21.10    3.50
  -6  -1  -1  307.17   17.10
   6   1   1  287.27   19.30
   6   1   1  330.37   17.40
  -7  -1  -1  401.66   22.50
   7   1   1  424.76   22.80
  -8  -1  -1 1189.48   54.59
  -8  -1  -1 1095.19   52.39
  -8  -1  -1 1060.79   53.39
  -8  -1  -1 1050.89   53.09
   8   1   1 1044.20   52.69
   8   1   1 1000.00   50.09
   8   1   1 1088.09   49.80
  -9  -1  -1  823.52   45.80
  -9  -1  -1  821.52   42.80
  -9  -1  -1  844.42   44.10
  -9  -1  -1  792.52   43.20
   9   1   1  827.12   49.60
   9   1   1  870.71   44.10
   9   1   1  852.21   39.90
   9   1   1  857.31   40.30
 -10  -1  -1  456.65   27.40
 -10  -1  -1  425.26   28.90
 -10  -1  -1  453.05   27.10
 -10  -1  -1  373.86   29.60
  10   1   1  445.76   23.00
  10   1   1  475.65   33.70
  10   1   1  449.06   23.30
  10   1   1  441.06   28.60
 -11  -1  -1   98.39   15.70
 -11  -1  -1  142.49   14.40
  11   1   1  116.69   10.50
  11   1   1  115.79    9.80
  11   1   1  113.09   16.40
 -12  -1  -1   -1.50    5.30
  12   1   1    8.50    4.40
  12   1   1   -4.40   11.70
  12   1   1    2.50    7.50
  12   1   1    7.00    5.00
 -13  -1  -1   46.50    7.00
  13   1   1   40.60    6.20
  13   1   1   52.89   11.50
 -14  -1  -1    5.60    4.00
  14   1   1    5.10    4.30
  15  -2  -1   63.19    8.60
  15  -2  -1   76.79   10.10
 -15   2   1   75.99    9.20
  14  -2  -1   22.80    8.30
  14  -2  -1    9.00    5.10
 -14   2   1    9.00    6.20
 -14   2   1   18.90    6.50
  13  -2  -1    2.40    9.00
 -13   2   1   18.60    7.40
 -13   2   1   -2.30    6.00
  12  -2  -1   93.79   13.20
  12  -2  -1   42.20   13.50
  12  -2  -1   87.79    9.80
 -12   2   1   59.59   16.40
 -12   2   1   60.59   10.20
 -12   2   1   64.59    9.60
 -12   2   1   39.90   13.60
  11  -2  -1   95.69    9.40
  11  -2  -1   81.39   13.70
  11  -2  -1   64.59    8.00
 -11   2   1   97.09   12.70
 -11   2   1   73.49   11.30
 -11   2   1   75.69   11.90
 -11   2   1   66.99   10.00
  10  -2  -1  215.98   25.10
  10  -2  -1  260.17   15.70
  10  -2  -1  249.18   18.40
  10  -2  -1  275.37   15.60
  10  -2  -1  279.07   22.80
 -10   2   1  278.47   19.00
 -10   2   1  277.67   17.70
 -10   2   1  293.67   20.00
 -10   2   1  279.67   20.40
   9  -2  -1    6.00    5.10
   9  -2  -1    2.40    3.90
   9  -2  -1   10.20    8.00
  -9   2   1    5.00    7.50
   8  -2  -1   52.99    7.00
   8  -2  -1   48.00    7.70
   7  -2  -1  319.77   15.00
   7  -2  -1  295.67   17.60
   7  -2  -1  315.67   16.90
   6  -2  -1  638.74   29.80
   6  -2  -1  654.43   31.70
   6  -2  -1  655.93   31.00
   5  -2  -1  280.97   14.40
   5  -2  -1  277.67   14.00
   5  -2  -1  265.57   13.10
   4  -2  -1    8.60    1.80
   4  -2  -1    9.70    1.40
   3  -2  -1  111.49    5.60
   3  -2  -1  109.39    6.00
   2  -2  -1   32.10    2.40
   2  -2  -1   35.70    2.20
   0  -2  -1   36.80    2.70
   0  -2  -1   34.00    2.50
   0   2   1   34.80    2.60
  -1  -2  -1   93.99    5.20
  -1  -2  -1   84.29    5.20
  -2  -2  -1   11.70    2.20
  -2  -2  -1   15.90    2.40
   2   2   1   15.00    3.20
  -3  -2  -1  256.87   13.80
  -3  -2  -1  249.88   14.00
   3   2   1  280.87   14.90
   3   2   1  290.87   14.10
  -4  -2  -1  693.93   32.50
  -4  -2  -1  728.03   30.30
  -4  -2  -1  686.03   32.90
   4   2   1  620.74   33.40
   4   2   1  666.33   32.60
  -5  -2  -1  352.46   19.20
  -5  -2  -1  374.76   18.70
   5   2   1  352.16   18.80
   5   2   1  315.47   20.70
  -6  -2  -1   38.20    6.50
  -6  -2  -1   48.30    6.80
   6   2   1   50.99   13.50
  -7  -2  -1    2.90    7.90
  -7  -2  -1    5.60    6.20
  -7  -2  -1    3.00    5.00
   7   2   1    6.10    4.50
   7   2   1    7.10    3.20
   7   2   1    6.40    4.60
  -8  -2  -1  306.07   20.80
  -8  -2  -1  281.87   21.40
  -8  -2  -1  279.67   21.10
  -8  -2  -1  249.28   25.90
  -8  -2  -1  310.07   19.30
   8   2   1  215.18   30.70
   8   2   1  270.37   15.30
   8   2   1  269.87   16.10
   8   2   1  275.77   19.20
  -9  -2  -1   94.79   11.70
  -9  -2  -1   59.49   14.30
  -9  -2  -1   90.29   11.90
  -9  -2  -1   79.29   11.80
   9   2   1   75.69   17.30
   9   2   1  113.29   14.80
   9   2   1  105.09    8.60
   9   2   1  110.49    9.40
 -10  -2  -1   55.09   10.80
 -10  -2  -1   64.29   21.00
 -10  -2  -1   81.79   11.10
  10   2   1   68.19    8.40
  10   2   1   86.19    8.40
  10   2   1   54.09   11.90
  10   2   1   85.29   16.60
 -11  -2  -1    7.50    6.10
  11   2   1   -1.70    4.00
  11   2   1    6.70   12.70
  11   2   1    9.00    5.40
  11   2   1    6.40    5.40
 -12  -2  -1    9.90    5.50
  12   2   1   16.10    4.50
  12   2   1   10.60    4.90
  12   2   1   24.60   12.60
 -13  -2  -1   76.99    9.00
  13   2   1   88.79    8.80
  13   2   1   55.39   13.10
  15  -3  -1  117.79   10.40
  15  -3  -1  131.99   12.60
 -15   3   1  104.89   12.20
 -15   3   1  118.49   11.10
  14  -3  -1   39.70    8.90
 -14   3   1   65.19    9.70
 -14   3   1   65.49    8.20
  13  -3  -1  138.29   16.70
 -13   3   1  135.19   14.00
 -13   3   1  123.79   15.80
  12  -3  -1    4.40    8.90
  12  -3  -1   23.70   11.80
  12  -3  -1    3.10    5.60
 -12   3   1    9.70    6.80
 -12   3   1    3.30    6.70
 -12   3   1   15.00    8.30
 -12   3   1   20.10   10.40
  11  -3  -1  106.09   18.90
  11  -3  -1  107.59   10.30
  11  -3  -1  111.59   14.30
  11  -3  -1  110.79   16.50
 -11   3   1   93.99   12.30
 -11   3   1  109.59   14.20
 -11   3   1   90.89   12.90
  10  -3  -1   15.20   10.20
  10  -3  -1   14.40    5.10
  10  -3  -1   -0.20    9.70
  10  -3  -1   17.40    5.10
  10  -3  -1   11.40    6.10
 -10   3   1    9.40    6.80
 -10   3   1   11.70    7.60
 -10   3   1   14.30   10.50
   9  -3  -1   73.29    7.40
   9  -3  -1   69.09    8.50
   9  -3  -1   70.29   10.70
   8  -3  -1  376.06   19.50
   8  -3  -1  430.86   21.70
   8  -3  -1  415.16   22.60
   7  -3  -1 1228.88   57.29
   7  -3  -1 1146.09   55.19
   7  -3  -1 1286.97   56.69
   6  -3  -1 2962.70  135.59
   6  -3  -1 3132.19  136.49
   5  -3  -1  250.27   12.70
   5  -3  -1  244.78   12.10
   4  -3  -1 1313.27   60.09
   4  -3  -1 1352.76   59.69
   3  -3  -1   86.79    5.20
   3  -3  -1   95.29    5.00
   2  -3  -1   91.59    5.20
   2  -3  -1   95.19    5.30
   1  -3  -1  130.59    6.90
   1  -3  -1  128.49    6.90
   0  -3  -1   93.19    5.40
   0  -3  -1   90.89    5.50
   0   3   1   92.09    5.60
  -1  -3  -1 1268.57   58.19
  -1  -3  -1 1209.38   58.29
   1   3   1 1389.46   58.59
  -2  -3  -1  291.87   14.40
  -2  -3  -1  314.87   14.30
   2   3   1  252.37   14.10
   2   3   1  240.88   15.10
  -3  -3  -1 3084.39  144.79
  -3  -3  -1 3337.87  144.69
   3   3   1 3228.88  145.79
   3   3   1 3271.77  144.99
  -4  -3  -1 1182.08   58.19
  -4  -3  -1 1318.57   55.79
  -4  -3  -1 1208.58   57.89
   4   3   1 1184.58   59.59
   4   3   1 1348.86   58.59
  -5  -3  -1  453.75   22.80
  -5  -3  -1  434.86   23.40
   5   3   1  415.76   23.10
   5   3   1  423.06   21.20
  -6  -3  -1   63.39   10.30
  -6  -3  -1   55.19    8.10
   6   3   1   74.49    8.60
   6   3   1   62.69    6.10
  -7  -3  -1   14.80    8.00
  -7  -3  -1    3.20    9.00
  -7  -3  -1   15.40    9.30
  -7  -3  -1    8.90    6.30
   7   3   1   17.60    3.90
   7   3   1    3.30    5.70
   7   3   1    5.90    4.50
  -8  -3  -1  103.29   12.30
  -8  -3  -1   85.29   12.30
  -8  -3  -1   96.19   13.90
   8   3   1  117.69   10.00
   8   3   1  115.29   20.90
   8   3   1  128.19   13.90
   8   3   1  112.29    8.80
  -9  -3  -1   10.30   13.00
  -9  -3  -1   -1.50    9.90
  -9  -3  -1   16.30    7.00
   9   3   1    4.50    4.50
   9   3   1    5.00    4.20
   9   3   1   18.00    9.40
   9   3   1   20.30   16.20
 -10  -3  -1   99.99   13.10
  10   3   1  128.99   10.10
  10   3   1   96.39   17.50
  10   3   1  109.89   12.40
  10   3   1  128.89   10.40
 -11  -3  -1   60.69    8.60
  11   3   1   50.99    7.50
  11   3   1   55.89    8.00
  11   3   1   63.09    7.70
  11   3   1   73.99   16.00
 -12  -3  -1  125.59   10.90
  12   3   1  113.19    9.40
  12   3   1  120.39   10.40
  16  -4  -1   66.49   12.40
  16  -4  -1   78.49    9.40
 -16   4   1   83.59   10.00
  15  -4  -1   -0.10    4.90
  15  -4  -1    0.50    6.30
 -15   4   1   10.10    5.40
 -15   4   1   -5.30    6.20
  14  -4  -1   -1.70    7.10
 -14   4   1    1.00    5.60
 -14   4   1   -3.20    7.40
  13  -4  -1  100.89   13.80
 -13   4   1  102.69   13.50
 -13   4   1  136.39   16.50
  12  -4  -1   27.40   10.70
  12  -4  -1   20.90    9.20
  12  -4  -1   33.70   32.10
 -12   4   1   23.90    7.90
 -12   4   1   28.60    9.80
 -12   4   1   34.70    7.10
  11  -4  -1  480.45   29.10
  11  -4  -1  430.46   27.20
  11  -4  -1  450.95   23.50
  11  -4  -1  498.55   32.20
 -11   4   1  410.36   29.50
 -11   4   1  454.05   25.30
 -11   4   1  463.55   27.60
  10  -4  -1  173.98   17.80
  10  -4  -1  176.68   12.10
  10  -4  -1  171.58   12.60
  10  -4  -1  177.08   13.40
  10  -4  -1  130.29   16.60
 -10   4   1  166.48   16.70
 -10   4   1  159.18   14.20
 -10   4   1  151.38   20.10
   9  -4  -1  149.99   14.00
   9  -4  -1  175.28   12.10
   8  -4  -1   37.60    6.10
   8  -4  -1   33.00    5.10
   8  -4  -1   34.30    5.60
   7  -4  -1 1200.78   53.59
   7  -4  -1 1105.39   52.49
   6  -4  -1  661.43   31.30
   6  -4  -1  660.73   30.70
   5  -4  -1 1822.12   83.49
   5  -4  -1 1887.71   83.09
   4  -4  -1  272.07   14.00
   4  -4  -1  296.97   13.80
   3  -4  -1 1411.66   61.19
   3  -4  -1 1314.27   61.29
   2  -4  -1   11.80    2.10
   2  -4  -1   11.80    2.10
   1  -4  -1 1381.26   61.09
   1  -4  -1 1384.46   61.09
  -1   4   1 1291.67   61.29
   0  -4  -1  293.77   14.80
   0  -4  -1  297.77   14.70
   0   4   1  295.47   15.10
  -1  -4  -1 1863.31   86.59
  -1  -4  -1 1934.21   86.59
   1   4   1 1964.90   86.99
  -2  -4  -1  666.63   31.80
  -2  -4  -1  686.23   31.50
   2   4   1  701.23   32.10
   2   4   1  587.74   32.90
  -3  -4  -1 1311.67   60.59
  -3  -4  -1 1344.47   60.29
   3   4   1 1254.77   60.69
  -4  -4  -1   41.70    6.30
  -4  -4  -1   28.80    4.10
  -4  -4  -1   39.80    5.90
   4   4   1   32.80    4.40
   4   4   1   40.80    6.00
  -5  -4  -1  160.08   14.00
  -5  -4  -1  160.98   12.30
   5   4   1  180.88   10.60
   5   4   1  190.98   13.30
  -6  -4  -1  165.38   13.40
  -6  -4  -1  169.98   15.90
   6   4   1  156.18   10.60
   6   4   1  155.98   12.10
   6   4   1  191.08   14.10
  -7  -4  -1  450.55   26.90
  -7  -4  -1  450.35   26.80
  -7  -4  -1  382.06   28.50
   7   4   1  455.65   22.90
   7   4   1  442.86   23.50
   7   4   1  458.35   27.40
  -8  -4  -1   31.60   12.30
  -8  -4  -1   20.30    7.40
   8   4   1   30.50    9.90
   8   4   1   22.20    7.30
   8   4   1   28.00    4.90
   8   4   1   29.30    5.70
  -9  -4  -1  147.89   14.20
   9   4   1  116.39   12.80
   9   4   1  112.89    9.90
   9   4   1   98.39    9.60
 -10  -4  -1    7.40    5.50
  10   4   1   -0.30    3.80
  10   4   1    7.90    5.70
  10   4   1    1.90    5.10
 -11  -4  -1    8.00    4.70
  11   4   1   -1.20    3.70
  11   4   1   -2.20    4.50
 -12  -4  -1  101.09    9.40
  12   4   1   88.79    8.70
  16  -5  -1   21.90    6.20
  16  -5  -1   31.90    8.50
 -16   5   1   18.20    5.60
 -16   5   1   24.90    6.60
  15  -5  -1   94.89   12.30
 -15   5   1   84.29   11.10
 -15   5   1   74.99   10.70
 -15   5   1   72.69    9.80
  14  -5  -1   -7.70    6.50
 -14   5   1    3.70    8.40
 -14   5   1    0.60    5.80
  13  -5  -1   28.60    8.80
 -13   5   1   15.50    6.70
 -13   5   1    7.00    8.50
 -13   5   1   31.80    6.80
  12  -5  -1   11.00   16.60
  12  -5  -1    3.00   11.20
  12  -5  -1   16.40    8.60
 -12   5   1    9.00    7.50
 -12   5   1   23.00   10.60
 -12   5   1   19.40    6.70
  11  -5  -1  252.17   20.70
  11  -5  -1  231.98   18.80
  11  -5  -1  273.47   21.50
 -11   5   1  251.07   17.50
 -11   5   1  224.68   23.30
 -11   5   1  259.17   20.00
  10  -5  -1   67.99   10.80
  10  -5  -1   79.39   10.20
  10  -5  -1   65.49   10.10
 -10   5   1   76.09   10.70
 -10   5   1   58.79   13.80
 -10   5   1   79.89   11.50
   9  -5  -1  177.08   13.40
   9  -5  -1  174.68   12.20
   9  -5  -1  162.08   11.10
   8  -5  -1  389.46   20.20
   8  -5  -1  422.96   21.50
   7  -5  -1  356.56   17.70
   7  -5  -1  350.76   18.40
   6  -5  -1   14.80    2.40
   6  -5  -1   15.90    3.30
   5  -5  -1   12.40    2.10
   4  -5  -1 2014.40   87.09
   4  -5  -1 1880.51   87.19
   4  -5  -1 1928.01   87.39
   3  -5  -1  300.77   15.00
   3  -5  -1  298.67   15.00
   2  -5  -1  273.87   13.60
   2  -5  -1  254.17   13.40
   1  -5  -1 1881.71   85.49
   1  -5  -1 1906.41   85.49
  -1   5   1 1907.11   86.09
   0  -5  -1   20.30    3.20
   0  -5  -1   18.00    3.50
   0   5   1   15.80    3.20
  -1  -5  -1   14.90    3.70
  -1  -5  -1   19.70    3.30
   1   5   1   19.30    3.80
  -2  -5  -1  341.67   18.00
  -2  -5  -1  329.97   18.50
   2   5   1  358.76   18.90
  -3  -5  -1  397.66   23.60
  -3  -5  -1  434.36   22.90
  -3  -5  -1  472.15   22.70
  -3  -5  -1  458.75   21.30
   3   5   1  483.05   24.20
   3   5   1  424.86   21.80
  -4  -5  -1  174.08   12.20
  -4  -5  -1  156.88   14.20
   4   5   1  189.28   13.20
   4   5   1  179.58   10.70
  -5  -5  -1   63.59    9.80
  -5  -5  -1   63.59    9.70
   5   5   1   67.99    9.90
   5   5   1   86.69    9.40
   5   5   1   79.39    7.20
   5   5   1   77.89   10.30
  -6  -5  -1  261.87   19.70
  -6  -5  -1  245.88   18.80
   6   5   1  243.28   15.50
   6   5   1  234.38   14.30
   6   5   1  262.57   18.60
   6   5   1  234.58   18.90
  -7  -5  -1   12.60   11.90
  -7  -5  -1   17.60    7.60
   7   5   1    6.30    4.60
   7   5   1   14.50    6.70
   7   5   1    8.30    8.40
   7   5   1   11.10    4.30
  -8  -5  -1   17.80    6.90
   8   5   1   31.20   11.40
   8   5   1   45.90    8.30
   8   5   1   27.10    5.30
   8   5   1   27.00    5.30
  -9  -5  -1   -2.70    5.30
   9   5   1   -0.90    4.40
   9   5   1   -0.80    5.50
   9   5   1    0.80    3.90
 -10  -5  -1   74.79    9.70
  10   5   1   89.69   10.40
  10   5   1   75.79    7.90
 -11  -5  -1   25.00    5.00
  11   5   1   27.60    5.50
  11   5   1   22.10    4.50
  16  -6  -1   14.80    5.50
 -16   6   1    9.30    6.70
 -16   6   1   16.10    5.30
  15  -6  -1   50.69    8.40
 -15   6   1   36.40    9.50
 -15   6   1   28.10    6.30
  14  -6  -1  132.59   15.30
 -14   6   1  124.69   13.70
 -14   6   1  141.49   17.90
  13  -6  -1   13.50   19.50
  13  -6  -1   10.40   16.70
  13  -6  -1   15.30    7.90
 -13   6   1    3.20    6.60
 -13   6   1   10.80   10.10
 -13   6   1   13.30    6.10
  12  -6  -1  -16.80   11.10
  12  -6  -1    9.00    8.30
  12  -6  -1   23.00   13.80
 -12   6   1    1.30    6.00
 -12   6   1    0.50   11.10
 -12   6   1    6.90    7.30
  11  -6  -1  256.67   19.70
  11  -6  -1  233.38   19.90
  11  -6  -1  271.97   20.30
 -11   6   1  260.37   17.60
 -11   6   1  256.47   19.90
 -11   6   1  251.67   24.20
  10  -6  -1  171.68   16.50
  10  -6  -1  157.98   15.40
  10  -6  -1  126.99   12.90
  10  -6  -1  175.78   13.80
 -10   6   1  203.48   16.60
 -10   6   1  158.28   14.10
   9  -6  -1   63.69    9.90
   9  -6  -1   61.39    7.30
   9  -6  -1   49.40    8.30
   8  -6  -1   50.19    6.60
   8  -6  -1   54.99    6.00
   7  -6  -1  321.57   16.20
   7  -6  -1  301.87   16.80
   6  -6  -1   61.99    5.80
   6  -6  -1   52.49    4.80
   5  -6  -1   21.60    3.20
   5  -6  -1   25.80    4.20
   5  -6  -1   22.40    3.80
   4  -6  -1  693.53   33.50
   4  -6  -1  691.13   33.50
   4  -6  -1  753.42   33.40
   3  -6  -1 3602.94  155.18
   3  -6  -1 3359.26  155.18
   3  -6  -1 3473.35  155.38
   2  -6  -1  706.53   33.10
   2  -6  -1  688.13   33.40
   2  -6  -1  729.73   33.50
   1  -6  -1   20.00    3.80
   1  -6  -1   17.40    3.20
   1  -6  -1   19.50    3.40
  -1   6   1   20.50    4.00
   0  -6  -1   48.60    5.20
   0  -6  -1   53.89    6.40
   0  -6  -1   51.59    5.40
   0   6   1   54.69    6.20
  -1  -6  -1  367.26   17.90
  -1  -6  -1  337.27   18.60
  -1  -6  -1  333.17   17.10
   1   6   1  310.77   17.00
   1   6   1  321.57   18.60
  -2  -6  -1   68.09    5.60
  -2  -6  -1   60.19    6.80
  -2  -6  -1   49.30    7.20
  -2  -6  -1   76.99    7.50
   2   6   1   59.49    7.40
   2   6   1   56.39    6.30
  -3  -6  -1   54.09    7.80
   3   6   1   57.69    8.40
  -4  -6  -1  185.88   16.60
  -4  -6  -1  168.88   13.40
   4   6   1  188.28   14.80
   4   6   1  171.18   11.10
   4   6   1  176.68   13.10
   4   6   1  163.38   16.50
  -5  -6  -1  228.08   18.50
  -5  -6  -1  258.57   19.10
   5   6   1  247.58   19.10
   5   6   1  234.48   18.70
   5   6   1  243.38   14.50
   5   6   1  249.78   15.80
  -6  -6  -1    5.30    6.80
   6   6   1   10.10    4.10
   6   6   1    3.10    4.90
   6   6   1   12.30    7.00
   6   6   1    2.90    8.00
  -7  -6  -1    9.80    6.20
   7   6   1   10.20    7.10
   7   6   1    5.50    4.20
   7   6   1   22.10   11.30
   7   6   1    6.90    4.70
  -8  -6  -1  136.49   13.20
   8   6   1  143.19   14.10
   8   6   1  120.89   10.70
   8   6   1  133.19   10.70
  -9  -6  -1   59.39    9.00
   9   6   1   49.60    7.90
   9   6   1   55.29    7.20
 -10  -6  -1   17.10    4.60
  10   6   1    7.80    4.50
  10   6   1   18.30    4.10
  16  -7  -1   31.70    6.40
 -16   7   1   60.19    9.00
 -16   7   1   37.10    6.10
  15  -7  -1   89.39   11.90
 -15   7   1  104.89   12.60
 -15   7   1   86.39   10.80
  14  -7  -1   94.49   13.00
 -14   7   1   75.99   13.00
 -14   7   1   72.59   10.30
 -14   7   1   98.09   12.30
  13  -7  -1    9.90    7.40
  13  -7  -1   -2.30   15.90
 -13   7   1   10.40    7.00
 -13   7   1    8.70    5.90
 -13   7   1   12.70   11.80
  12  -7  -1   16.90   13.50
  12  -7  -1   21.60    8.10
  12  -7  -1   13.60   13.30
 -12   7   1   -8.20   11.90
 -12   7   1   15.50    8.00
 -12   7   1   12.60    6.40
  11  -7  -1  401.56   28.20
  11  -7  -1  434.16   27.30
  11  -7  -1  470.75   27.70
 -11   7   1  458.35   25.30
 -11   7   1  450.85   27.50
  10  -7  -1   19.40    6.20
  10  -7  -1    3.40    6.80
  10  -7  -1   21.20    8.20
  10  -7  -1   22.00    7.30
 -10   7   1    1.40    7.60
 -10   7   1   17.20    6.90
   9  -7  -1    9.70    4.50
   9  -7  -1    4.70    5.10
   9  -7  -1   -1.40    7.70
  -9   7   1    5.80    6.80
  -9   7   1    9.50    8.10
   8  -7  -1  438.16   23.30
   8  -7  -1  442.46   22.50
   7  -7  -1   31.00    4.90
   7  -7  -1   38.40    5.00
   6  -7  -1  341.27   17.20
   6  -7  -1  321.27   17.60
   5  -7  -1  336.87   18.30
   5  -7  -1  377.76   18.00
   5  -7  -1  342.77   18.20
   4  -7  -1 1307.77   62.29
   4  -7  -1 1337.77   62.29
   4  -7  -1 1429.96   62.19
   3  -7  -1 1359.26   58.99
   3  -7  -1 1265.27   58.99
   3  -7  -1 1232.18   59.09
   2  -7  -1  377.16   19.70
   2  -7  -1  399.16   19.30
   2  -7  -1  376.06   19.90
   2  -7  -1  384.96   19.40
   1  -7  -1  318.57   18.10
   1  -7  -1  315.97   17.10
   1  -7  -1  313.97   17.40
   1  -7  -1  345.07   17.10
  -1   7   1  360.66   19.20
  -1   7   1  345.07   17.40
   0  -7  -1   42.20    5.60
   0  -7  -1   33.70    5.80
   0  -7  -1   36.50    4.80
   0  -7  -1   40.30    4.70
   0   7   1   42.20    6.70
   0   7   1   42.20    6.20
  -1  -7  -1  459.35   21.80
  -1  -7  -1  426.46   22.70
  -1  -7  -1  413.46   21.90
   1   7   1  418.96   21.80
   1   7   1  453.75   24.50
  -2  -7  -1    5.80    4.50
  -2  -7  -1    4.20    3.70
  -2  -7  -1   -9.70    7.20
  -2  -7  -1    2.70    5.50
  -2  -7  -1    3.00    7.80
   2   7   1    4.30    5.10
   2   7   1   -0.80    3.50
  -3  -7  -1   10.20    5.90
  -3  -7  -1   18.10    7.40
   3   7   1   18.10    8.60
   3   7   1   13.80    5.90
   3   7   1   12.80    4.00
   3   7   1    8.70    5.50
  -4  -7  -1  440.06   26.70
  -4  -7  -1  473.75   27.50
   4   7   1  464.85   28.30
   4   7   1  471.55   24.90
   4   7   1  437.56   23.60
   4   7   1  444.16   28.00
  -5  -7  -1   29.50    7.70
   5   7   1   17.30    8.90
   5   7   1   12.90    7.90
   5   7   1   13.30    4.60
   5   7   1   13.90    5.30
  -6  -7  -1    8.60    6.40
   6   7   1    8.20    4.30
   6   7   1   18.00   11.80
   6   7   1    7.30    7.40
   6   7   1   16.90    5.50
  -7  -7  -1   73.79   10.50
   7   7   1   81.69    9.00
   7   7   1   64.69    9.50
   7   7   1   75.09    8.40
  -8  -7  -1   89.49   10.50
   8   7   1  101.39    8.70
   8   7   1   88.29   11.30
  -9  -7  -1   41.90    6.00
   9   7   1   42.30    6.00
   9   7   1   38.70    6.10
  16  -8  -1   41.80    6.70
 -16   8   1   61.29    8.30
 -16   8   1   72.99   10.30
  15  -8  -1   86.29   11.70
 -15   8   1   86.79   11.00
 -15   8   1  104.69   13.60
  14  -8  -1  125.29   14.40
 -14   8   1  138.49   14.20
 -14   8   1  161.38   20.40
 -14   8   1  131.19   11.80
  13  -8  -1   23.80   16.60
  13  -8  -1   10.90    7.10
 -13   8   1   30.30    8.00
 -13   8   1   27.20    6.40
 -13   8   1   29.70   13.20
  12  -8  -1   39.90   12.30
  12  -8  -1   31.60    8.40
 -12   8   1   40.80    8.90
 -12   8   1   30.30    6.90
 -12   8   1    8.00   13.60
  11  -8  -1   72.99   11.90
  11  -8  -1   89.89   13.70
 -11   8   1  106.49   12.10
 -11   8   1   94.29   14.00
  10  -8  -1  257.47   24.30
  10  -8  -1  310.07   18.10
  10  -8  -1  304.27   20.00
  10  -8  -1  290.07   20.40
 -10   8   1  251.27   20.60
 -10   8   1  257.27   18.40
   9  -8  -1 1156.28   54.09
   9  -8  -1 1161.18   53.29
   9  -8  -1 1148.99   55.29
  -9   8   1 1073.59   53.89
  -9   8   1 1043.10   55.59
   8  -8  -1  349.96   19.80
   8  -8  -1  337.97   18.70
   7  -8  -1  445.16   22.20
   7  -8  -1  414.46   22.80
   6  -8  -1   58.39    7.50
   6  -8  -1   62.59    6.00
   5  -8  -1  454.05   22.90
   5  -8  -1  436.26   23.30
   5  -8  -1  474.45   23.30
   4  -8  -1   36.30    4.60
   4  -8  -1   44.10    7.20
   4  -8  -1   45.80    5.80
   3  -8  -1  465.95   23.50
   3  -8  -1  499.25   23.50
   3  -8  -1  434.86   23.90
   2  -8  -1   61.09    6.40
   2  -8  -1   60.39    5.80
   2  -8  -1   51.59    8.60
   2  -8  -1   59.09    6.50
   1  -8  -1  450.45   22.90
   1  -8  -1  454.15   22.40
   1  -8  -1  478.35   22.40
  -1   8   1  417.76   24.40
  -1   8   1  383.96   22.10
   0  -8  -1  349.17   19.00
   0  -8  -1  344.27   19.50
   0  -8  -1  384.16   19.00
   0   8   1  366.46   21.70
   0   8   1  335.77   18.80
  -1  -8  -1 1111.69   52.59
  -1  -8  -1 1073.99   55.09
  -1  -8  -1 1155.18   52.79
  -1  -8  -1 1067.09   53.49
   1   8   1 1196.88   56.29
   1   8   1 1144.59   52.79
   1   8   1 1117.59   56.59
   1   8   1 1149.69   54.09
  -2  -8  -1  269.57   18.50
  -2  -8  -1  278.97   19.80
   2   8   1  289.77   21.90
   2   8   1  294.47   18.60
   2   8   1  290.17   16.70
   2   8   1  342.47   21.30
  -3  -8  -1  101.99   12.30
  -3  -8  -1   88.59   13.00
   3   8   1  106.59   11.10
   3   8   1  101.29    9.20
   3   8   1  119.69   15.10
   3   8   1   92.69   14.20
  -4  -8  -1   30.50    7.50
   4   8   1   32.40    6.50
   4   8   1   18.30    8.00
   4   8   1   33.00    5.40
   4   8   1   45.80   11.50
  -5  -8  -1   37.40    7.80
   5   8   1   25.30    7.80
   5   8   1   28.10    5.10
   5   8   1   27.60    5.60
   5   8   1   28.70   13.50
  -6  -8  -1  130.09   12.40
   6   8   1  109.29   10.10
   6   8   1  118.79   14.00
   6   8   1  129.79   10.80
  -7  -8  -1   87.79   10.00
   7   8   1   80.19   11.40
   7   8   1   86.39    8.40
  -8  -8  -1   47.10    7.70
   8   8   1   64.99    7.00
   8   8   1   72.39    8.90
  16  -9  -1   33.00    6.20
 -16   9   1   34.50   10.40
 -16   9   1   33.20    5.70
  15  -9  -1   30.70    6.50
 -15   9   1   53.59   12.00
 -15   9   1   55.29    7.90
 -15   9   1   11.70    5.80
  14  -9  -1   -5.50    5.70
 -14   9   1   -4.60   12.00
 -14   9   1   -0.20    5.00
 -14   9   1   -8.70    5.70
  13  -9  -1  134.09   14.30
  13  -9  -1  175.78   24.30
 -13   9   1  124.39   17.20
 -13   9   1  110.89   12.00
 -13   9   1  129.59   15.10
  12  -9  -1   -2.90   11.80
  12  -9  -1    1.60    6.50
 -12   9   1   19.70    6.70
 -12   9   1    5.00    7.40
  11  -9  -1   93.19   14.30
  11  -9  -1   72.39   11.20
  11  -9  -1   84.19   13.80
  11  -9  -1   92.09   13.50
 -11   9   1  113.99   12.10
 -11   9   1  108.19   14.30
  10  -9  -1  885.11   43.50
  10  -9  -1  777.72   41.30
  10  -9  -1  794.42   44.40
 -10   9   1  838.72   42.00
 -10   9   1  857.31   44.00
   9  -9  -1  136.69   14.70
   9  -9  -1  107.79   11.00
   9  -9  -1  146.39   16.90
  -9   9   1  129.29   13.50
  -9   9   1  116.69   15.20
   8  -9  -1 1112.99   55.89
   8  -9  -1 1081.99   53.79
  -8   9   1 1172.88   55.39
  -8   9   1 1179.68   57.09
   7  -9  -1    0.70    3.40
   7  -9  -1    3.20    7.50
   7  -9  -1   -3.40    5.70
   5  -9  -1  197.38   12.00
   5  -9  -1  189.58   12.50
   3  -9  -1   54.89    6.40
   3  -9  -1   68.89    7.20
   2  -9  -1    3.00    4.00
   2  -9  -1    9.50    7.20
   2  -9  -1    6.10    3.60
   1  -9  -1 1120.59   55.29
   1  -9  -1 1141.39   53.89
   1  -9  -1 1191.68   53.49
   1  -9  -1 1202.78   53.39
  -1   9   1 1050.69   56.39
  -1   9   1 1066.99   54.49
   0  -9  -1  127.39   10.30
   0  -9  -1  135.09   11.70
   0  -9  -1  115.19   14.00
   0  -9  -1  137.59   11.10
   0  -9  -1  113.89   16.70
   0   9   1  116.79   16.90
   0   9   1  133.79   13.60
   0   9   1  118.49    9.70
   0   9   1  100.99   13.20
  -1  -9  -1  887.61   42.30
  -1  -9  -1  868.71   43.50
  -1  -9  -1  893.81   44.40
   1   9   1  818.62   42.90
   1   9   1  858.21   41.90
   1   9   1  864.91   45.90
   1   9   1  876.71   46.10
  -2  -9  -1  109.89   15.80
  -2  -9  -1  104.39   13.80
  -2  -9  -1  119.59   13.30
   2   9   1   79.09   11.40
   2   9   1  106.99    9.50
   2   9   1  101.99   11.50
   2   9   1   93.49   15.20
  -3  -9  -1    9.40    6.50
   3   9   1    6.40    9.80
   3   9   1   29.70    8.30
   3   9   1    8.40    5.70
   3   9   1   11.00    4.30
  -4  -9  -1  105.99   12.70
   4   9   1  136.99   11.50
   4   9   1  146.89   15.40
  -5  -9  -1    0.30    5.30
   5   9   1   -0.60    4.30
   5   9   1   -0.50    5.90
  -6  -9  -1   53.79    8.50
   6   9   1   45.10    7.50
   6   9   1   45.10    7.00
  -7  -9  -1   37.30    5.50
   7   9   1   33.20    6.00
   7   9   1   45.20    6.30
  16 -10  -1   22.70    5.40
 -16  10   1   14.90    5.00
 -16  10   1   14.90   11.40
  15 -10  -1   75.39   10.10
 -15  10   1   76.39   10.50
 -15  10   1   75.99    9.50
 -15  10   1   64.39   13.70
  14 -10  -1    1.50    5.60
 -14  10   1    2.90    6.00
 -14  10   1    4.40    5.10
 -14  10   1   -9.60   13.90
  13 -10  -1  121.89   13.80
 -13  10   1  147.19   12.50
 -13  10   1  129.79   14.80
 -13  10   1  115.09   17.80
  12 -10  -1   62.29   13.00
  12 -10  -1   87.29   12.20
  12 -10  -1   71.79   14.70
 -12  10   1   89.29   11.50
 -12  10   1   89.59   13.60
  11 -10  -1  423.36   28.50
  11 -10  -1  500.05   28.10
  11 -10  -1  436.76   29.50
  11 -10  -1  449.16   29.40
 -11  10   1  487.05   29.20
 -11  10   1  468.25   26.40
  10 -10  -1  111.49   13.20
  10 -10  -1  100.39   16.30
  10 -10  -1  101.19   12.80
 -10  10   1  114.89   15.30
 -10  10   1  106.39   12.50
   9 -10  -1  926.51   46.80
   9 -10  -1  919.11   46.00
   9 -10  -1  826.52   44.10
  -9  10   1  895.71   45.00
  -9  10   1  893.41   47.00
   8 -10  -1  290.77   18.20
   8 -10  -1  302.27   20.90
  -8  10   1  306.87   22.70
  -8  10   1  314.27   20.20
   7 -10  -1   11.70    7.20
   7 -10  -1    8.20    4.50
  -7  10   1   10.70    7.50
  -7  10   1   13.50    9.90
   6 -10  -1  184.78   16.00
   6 -10  -1  210.18   16.90
   6 -10  -1  165.28   12.20
  -6  10   1  183.18   18.80
  -6  10   1  174.78   16.30
   5 -10  -1   80.39    8.10
   5 -10  -1   81.59    8.30
   5 -10  -1   77.19   10.80
   5 -10  -1   82.09   12.60
  -5  10   1   76.39   12.40
  -5  10   1   68.79   10.60
   4 -10  -1  186.48   16.30
   4 -10  -1  167.78   12.00
   4 -10  -1  168.98   16.30
   4 -10  -1  180.78   12.40
  -4  10   1  190.98   16.50
  -4  10   1  173.78   20.20
   3 -10  -1   13.30    7.20
   3 -10  -1   11.20    4.50
   3 -10  -1   11.60    7.90
   3 -10  -1   18.20    4.80
  -3  10   1   14.40    7.40
  -3  10   1   10.00    9.90
   2 -10  -1  312.17   17.60
   2 -10  -1  307.27   17.40
   2 -10  -1  291.87   20.00
   2 -10  -1  275.67   20.40
  -2  10   1  277.27   19.50
  -2  10   1  266.07   22.30
   1 -10  -1  791.62   44.00
   1 -10  -1  910.01   42.20
   1 -10  -1  893.61   44.40
   1 -10  -1  867.01   42.30
  -1  10   1  850.11   45.70
  -1  10   1  855.61   43.10
   0 -10  -1  123.89   13.50
   0 -10  -1  127.69   16.50
   0 -10  -1  120.39   12.50
   0  10   1  122.99   15.50
   0  10   1   98.49   12.30
  -1 -10  -1  460.45   27.00
   1  10   1  454.35   30.50
   1  10   1  461.95   29.00
   1  10   1  474.55   25.80
  -2 -10  -1   77.19   11.60
   2  10   1   76.09   10.70
   2  10   1   71.29   10.00
   2  10   1   85.29   14.80
  -3 -10  -1  127.99   12.70
   3  10   1  104.99   14.60
   3  10   1  129.09   11.30
  -4 -10  -1   -3.40    5.00
   4  10   1    0.20    6.10
   4  10   1    3.00    4.10
  -5 -10  -1   77.99    9.20
   5  10   1   72.99    7.90
   5  10   1   81.99   11.00
  -6 -10  -1   19.30    4.70
   6  10   1   14.30    4.70
   6  10   1   17.40    3.80
  16 -11  -1   25.50    5.00
 -16  11   1   23.20   13.20
 -16  11   1   19.30    4.80
  15 -11  -1    7.60    5.00
 -15  11   1   12.30   13.80
 -15  11   1   -0.80    4.90
 -15  11   1    0.80    4.90
  14 -11  -1   75.69   10.50
 -14  11   1   61.49    9.00
 -14  11   1   66.79    9.10
 -14  11   1   41.40   16.50
  13 -11  -1    8.50    6.10
 -13  11   1   43.80   24.80
 -13  11   1   15.20    7.20
 -13  11   1   12.10    5.50
  12 -11  -1  127.19   17.50
  12 -11  -1  127.39   13.50
 -12  11   1  109.49   11.90
 -12  11   1  151.38   15.30
  11 -11  -1   97.19   12.70
  11 -11  -1   94.69   13.30
  11 -11  -1   97.49   12.80
 -11  11   1  116.89   12.10
 -11  11   1  116.99   15.00
  10 -11  -1  460.65   29.50
  10 -11  -1  506.05   28.40
 -10  11   1  501.05   27.90
 -10  11   1  509.55   30.40
   9 -11  -1  119.89   13.50
   9 -11  -1  116.79   15.00
   9 -11  -1  119.19   12.50
  -9  11   1   98.39   15.50
  -9  11   1  115.59   13.00
   8 -11  -1  110.39   11.70
   8 -11  -1  116.89   13.90
  -8  11   1  128.49   16.00
  -8  11   1   89.69   13.00
   7 -11  -1  493.45   26.60
   7 -11  -1  486.15   28.10
  -7  11   1  485.15   27.70
  -7  11   1  461.15   30.10
   6 -11  -1  267.57   18.70
   6 -11  -1  268.67   19.30
   6 -11  -1  246.58   16.30
  -6  11   1  265.17   21.90
  -6  11   1  261.27   19.00
   5 -11  -1  248.28   19.00
   5 -11  -1  252.97   18.90
   5 -11  -1  259.57   16.70
  -5  11   1  249.58   18.70
  -5  11   1  279.77   21.50
   4 -11  -1  418.76   27.00
   4 -11  -1  479.15   27.20
   4 -11  -1  468.15   25.10
  -4  11   1  440.66   29.90
  -4  11   1  473.15   26.70
   3 -11  -1  111.09   11.20
   3 -11  -1   92.89   10.20
   3 -11  -1  129.89   13.60
   3 -11  -1  115.79   14.80
  -3  11   1  126.49   16.60
   2 -11  -1  104.89   10.90
   2 -11  -1  101.99   11.60
   2 -11  -1  100.39   14.90
   2 -11  -1   90.69   12.80
  -2  11   1  107.19   12.30
  -2  11   1  123.39   16.30
   1 -11  -1  403.66   27.60
   1 -11  -1  477.35   26.70
   1 -11  -1  462.75   26.90
  -1  11   1  469.45   29.50
  -1  11   1  491.35   26.40
   0 -11  -1  100.99   12.60
   0 -11  -1  111.89   12.60
   0 -11  -1   90.89   14.80
   0  11   1  104.69   11.50
   0  11   1  122.19   16.00
  -1 -11  -1  103.49   12.60
   1  11   1  140.19   12.10
   1  11   1  137.69   15.20
  -2 -11  -1   12.90    5.60
   2  11   1    5.40    6.90
   2  11   1   10.00    5.30
  -3 -11  -1   66.69    9.40
   3  11   1   53.59    8.70
   3  11   1   65.39    8.30
  -4 -11  -1    1.00    4.40
   4  11   1   -2.60    3.50
   4  11   1    3.30    5.50
  -5 -11  -1   26.10    4.60
   5  11   1   21.60    5.40
  16 -12  -1   91.39    8.40
 -16  12   1   86.59    8.30
  15 -12  -1  119.69   10.80
 -15  12   1  122.49   11.50
 -15  12   1  126.69    9.90
  14 -12  -1   15.10    5.50
 -14  12   1   10.40    5.00
 -14  12   1   14.40    6.00
  13 -12  -1  -12.20    9.30
  13 -12  -1    2.10    5.10
 -13  12   1   13.90    5.40
 -13  12   1    1.70    6.20
  12 -12  -1  139.99   16.40
  12 -12  -1  160.88   14.10
 -12  12   1  177.78   16.00
 -12  12   1  150.08   13.30
  11 -12  -1  119.49   15.20
  11 -12  -1  123.59   12.70
 -11  12   1  131.29   12.60
 -11  12   1  135.79   14.90
  10 -12  -1   73.59   11.60
  10 -12  -1  102.89   13.40
  10 -12  -1   82.79   12.10
 -10  12   1   75.29   11.10
 -10  12   1   70.19   10.90
   9 -12  -1    5.70    7.20
   9 -12  -1   10.00    7.10
   9 -12  -1    6.20    6.30
  -9  12   1    4.60    6.50
  -9  12   1    7.90    7.90
   8 -12  -1   29.50    7.50
   8 -12  -1   39.10    8.30
  -8  12   1   17.20    6.90
  -8  12   1   26.30    9.20
   7 -12  -1   14.60    6.30
   7 -12  -1   14.40    6.80
  -7  12   1   12.60    6.90
  -7  12   1   13.20    9.10
   6 -12  -1    5.50    6.50
   6 -12  -1    8.70    6.00
  -6  12   1    7.10    9.40
  -6  12   1   17.30    7.10
   5 -12  -1   11.00    6.20
   5 -12  -1   21.40    7.00
   5 -12  -1   20.10    7.30
  -5  12   1   15.10    9.30
  -5  12   1    2.50    7.00
   4 -12  -1   28.70    7.10
   4 -12  -1   42.50    8.90
   4 -12  -1   37.20    7.70
  -4  12   1   20.50    7.80
  -4  12   1   27.80    9.90
   3 -12  -1   23.10    7.10
   3 -12  -1   -3.40    6.80
   3 -12  -1    9.30    7.80
  -3  12   1   14.10    9.00
  -3  12   1    5.20    6.20
   2 -12  -1   63.79   10.40
   2 -12  -1   79.19   11.70
   2 -12  -1   61.39   11.10
  -2  12   1   76.79   11.80
   1 -12  -1  135.89   15.70
   1 -12  -1  134.69   13.30
   1 -12  -1  115.09   15.70
  -1  12   1  114.79   16.00
   0 -12  -1  165.28   13.90
   0  12   1  182.08   17.20
  -1 -12  -1    2.10    5.00
   1  12   1    3.20    6.90
  -2 -12  -1    4.90    4.80
   2  12   1   14.40    6.70
  -3 -12  -1  122.49    9.70
   3  12   1  127.19   12.20
   3  12   1  116.49    9.50
   4  12   1   83.49    7.30
   4  12   1   91.69    9.30
  15 -13  -1   90.79    9.10
 -15  13   1   64.39    8.30
 -15  13   1   98.69    9.60
  14 -13  -1   38.50    6.20
 -14  13   1   41.10    5.90
 -14  13   1   43.50    7.00
  13 -13  -1   67.19   10.00
  13 -13  -1   86.39    9.90
 -13  13   1   84.69    9.40
 -13  13   1   73.29   11.00
  12 -13  -1    3.40    5.10
  12 -13  -1    5.60    6.70
 -12  13   1   11.10    5.40
 -12  13   1    1.80    6.20
  11 -13  -1    7.50    5.60
  11 -13  -1   13.40    7.10
 -11  13   1    2.00    6.30
 -11  13   1    1.30    5.30
  10 -13  -1  161.48   15.20
  10 -13  -1  134.69   13.00
 -10  13   1  121.19   15.30
 -10  13   1  128.99   12.60
   9 -13  -1  114.99   12.50
   9 -13  -1  115.39   13.80
  -9  13   1  124.19   15.80
  -9  13   1  133.19   13.10
   8 -13  -1   32.90    7.90
   8 -13  -1   34.90    7.10
   8 -13  -1   16.50    8.40
  -8  13   1   25.00    8.90
  -8  13   1   28.00    7.00
   7 -13  -1   19.80    7.70
   7 -13  -1   11.20    6.30
  -7  13   1    7.20    8.40
  -7  13   1    5.50    6.10
   6 -13  -1   10.00    6.20
   6 -13  -1   10.60    7.70
  -6  13   1    6.60    6.30
  -6  13   1   21.70    8.80
   5 -13  -1   17.30    9.80
   5 -13  -1   20.50    6.70
  -5  13   1   29.20    9.60
  -5  13   1   42.90    7.50
   4 -13  -1  137.99   12.80
  -4  13   1  117.99   16.20
  -4  13   1  113.29   12.70
   3 -13  -1  120.79   14.20
   3 -13  -1  124.19   12.80
  -3  13   1  144.89   13.20
  -3  13   1  124.99   16.30
   2 -13  -1   11.70    5.70
   2 -13  -1   13.10    6.70
  -2  13   1   16.10    7.80
  -2  13   1   13.40    5.80
   1 -13  -1   -0.60    7.50
   1 -13  -1    1.00    5.10
  -1  13   1    8.60    5.10
  -1  13   1    8.30    7.10
   0 -13  -1   74.39    9.40
   0  13   1   95.29   12.60
   0  13   1   80.09    9.60
  -1 -13  -1   52.19    7.70
   1  13   1   47.10    7.70
   1  13   1   42.70    6.10
  -2 -13  -1   75.89    8.00
   2  13   1   85.59    8.00
   2  13   1   79.79   10.00
  15 -14  -1    6.00    3.70
 -15  14   1    1.70    4.90
  14 -14  -1    2.00    3.80
 -14  14   1   -0.80    4.20
 -14  14   1    1.60    4.60
  13 -14  -1   34.40    7.50
  13 -14  -1   43.10    6.20
 -13  14   1   42.10    5.80
 -13  14   1   53.69    7.70
  12 -14  -1   14.20    6.30
  12 -14  -1    8.20    4.70
 -12  14   1   11.20    5.00
 -12  14   1   12.20    6.20
  11 -14  -1   65.39    9.00
  11 -14  -1   65.79    9.30
 -11  14   1   65.69    9.40
 -11  14   1   54.59    9.00
  10 -14  -1    3.10    5.00
  10 -14  -1    0.30    5.30
 -10  14   1    2.40    4.90
 -10  14   1    0.90    6.20
   9 -14  -1   -0.60    5.90
   9 -14  -1   -2.00    4.90
  -9  14   1   -2.80    5.00
  -9  14   1   -4.30    6.90
   8 -14  -1  138.59   13.60
   8 -14  -1  140.29   12.50
  -8  14   1  137.99   12.80
  -8  14   1  151.38   15.80
   7 -14  -1   93.79   11.10
   7 -14  -1  108.19   12.40
  -7  14   1   98.49   11.70
  -7  14   1  115.29   15.00
   6 -14  -1  132.99   13.50
   6 -14  -1  142.29   12.70
  -6  14   1  141.29   16.20
  -6  14   1  149.39   13.20
   5 -14  -1   -7.70    5.30
   5 -14  -1    2.60    5.30
  -5  14   1   11.20    7.50
  -5  14   1   -8.30    5.10
   4 -14  -1    4.90    5.60
   4 -14  -1   -0.20    5.20
  -4  14   1   -8.00    6.90
  -4  14   1    0.70    5.10
   3 -14  -1   67.39    9.30
   3 -14  -1   66.69    9.10
  -3  14   1   65.49    8.30
  -3  14   1   62.19    9.60
   2 -14  -1   11.20    6.90
   2 -14  -1   20.10    5.10
  -2  14   1   13.50    5.20
  -2  14   1   15.10    6.70
   1 -14  -1   38.70    5.70
  -1  14   1   49.70    6.40
  -1  14   1   42.60    7.50
   0 -14  -1   -1.80    4.10
   0  14   1   -6.40    3.60
   0  14   1   -4.30    5.10
   1  14   1    2.20    3.50
   1  14   1    6.10    4.60
  14 -15  -1    4.90    3.70
 -14  15   1   10.00    4.10
 -14  15   1   -1.80    4.20
  13 -15  -1   60.89    7.60
  13 -15  -1   55.59    8.70
 -13  15   1   82.99    9.50
 -13  15   1   74.99    7.70
  12 -15  -1  133.09   11.70
  12 -15  -1  113.89    9.80
 -12  15   1  117.19    9.90
 -12  15   1  141.59   12.00
  11 -15  -1   -2.20    4.60
  11 -15  -1    2.30    4.20
 -11  15   1    3.40    4.30
 -11  15   1    4.20    5.60
  10 -15  -1   71.49    8.70
  10 -15  -1   75.19    9.90
 -10  15   1   74.29    8.80
 -10  15   1   60.39    8.90
   9 -15  -1   59.99    9.40
   9 -15  -1   60.89    8.40
  -9  15   1   61.49    8.90
   8 -15  -1   94.39   11.20
   8 -15  -1  105.99   10.10
  -8  15   1  110.69   10.70
  -8  15   1  110.09   12.70
   7 -15  -1  101.79   11.10
   7 -15  -1   89.89    9.80
  -7  15   1   88.69   10.20
  -7  15   1   96.59   12.20
   6 -15  -1   45.00    7.30
   6 -15  -1   53.79    8.40
  -6  15   1   43.70    6.60
  -6  15   1   47.80    8.40
   5 -15  -1   78.79   10.30
   5 -15  -1   75.29    8.80
  -5  15   1   89.29    9.60
  -5  15   1   91.59   12.20
   4 -15  -1    0.30    5.00
   4 -15  -1    8.60    4.50
  -4  15   1    5.40    4.40
  -4  15   1   12.50    6.10
   3 -15  -1  106.19   12.00
   3 -15  -1  116.39    9.10
  -3  15   1  130.69   12.30
  -3  15   1  129.39   10.20
  -2  15   1   85.69   10.10
  -2  15   1   93.19    8.40
  -1  15   1    4.80    3.50
  -1  15   1    7.00    4.50
  12 -16  -1   85.79    7.40
  12 -16  -1   90.39    9.20
 -12  16   1   90.69    9.50
 -12  16   1   82.89    7.80
  11 -16  -1   16.30    4.20
  11 -16  -1   21.10    5.00
 -11  16   1   30.00    4.70
 -11  16   1   20.30    5.30
  10 -16  -1   23.40    5.30
  10 -16  -1   16.20    4.30
 -10  16   1   11.70    5.10
 -10  16   1   18.60    4.60
   9 -16  -1   46.70    6.90
  -9  16   1   48.60    7.30
  -9  16   1   44.50    7.00
   8 -16  -1   64.19    7.40
   8 -16  -1   65.69    8.50
  -8  16   1   72.49   10.10
  -8  16   1   54.59    7.90
   7 -16  -1   41.00    6.30
   7 -16  -1   41.70    6.80
  -7  16   1   38.10    5.60
  -7  16   1   43.90    7.30
   6 -16  -1   15.50    4.90
  -6  16   1   15.40    5.80
  -6  16   1   16.20    4.40
   5 -16  -1   19.40    5.20
  -5  16   1   16.60    5.30
  -5  16   1   27.00    4.90
   4 -16  -1   81.79    9.70
  -4  16   1   82.39    7.80
  -4  16   1   87.39    9.30
  -4  16  -2   47.30    6.80
  -4  16  -2   43.30    6.50
   4 -16   2   59.49    8.20
   4 -16   2   49.60    6.10
  -5  16  -2   69.09    8.80
  -5  16  -2   71.39    7.40
   5 -16   2   47.40    7.90
   5 -16   2   64.29    7.10
  -6  16  -2   18.10    4.40
  -6  16  -2    9.60    5.00
   6 -16   2   12.00    4.20
   6 -16   2    9.10    4.40
  -7  16  -2   11.80    5.40
  -7  16  -2   20.70    4.60
   7 -16   2   21.30    4.60
   7 -16   2   26.10    5.60
  -8  16  -2    6.20    5.20
  -8  16  -2   20.50    4.40
   8 -16   2   15.00    4.10
  -9  16  -2   20.70    4.60
  -9  16  -2   21.60    5.60
   9 -16   2   16.80    4.90
   9 -16   2   17.30    4.30
 -10  16  -2   16.20    5.20
 -10  16  -2   18.60    4.60
  10 -16   2   12.00    4.40
  10 -16   2   15.20    4.10
 -11  16  -2   64.29    7.10
  11 -16   2   67.49    7.20
  11 -16   2   59.09    8.00
 -12  16  -2   60.29    8.50
 -12  16  -2   58.39    7.50
  12 -16   2   50.39    6.50
  -1  15  -2    4.80    3.50
  -1  15  -2    7.20    4.30
  -2  15  -2   48.30    6.90
  -2  15  -2   51.89    7.00
   2 -15   2   58.79    7.10
   2 -15   2   57.39    8.40
  -3  15  -2   34.70    5.30
  -3  15  -2   15.50    6.10
   3 -15   2   23.90    6.00
   3 -15   2   23.90    4.90
  -4  15  -2   16.10    4.80
  -4  15  -2   12.10    6.10
   4 -15   2   24.70    5.50
   4 -15   2   19.20    4.90
  -5  15  -2   26.90    7.10
  -5  15  -2   36.30    5.80
   5 -15   2   28.00    5.70
   5 -15   2   42.80    6.20
  -6  15  -2    0.20    5.80
  -6  15  -2    4.10    4.40
   6 -15   2    1.20    4.20
   6 -15   2    2.60    4.60
  -7  15  -2    2.30    5.80
  -7  15  -2   -4.00    4.30
   7 -15   2   -0.90    4.30
   7 -15   2    4.90    4.60
  -8  15  -2    3.90    4.60
  -8  15  -2    3.20    5.80
   8 -15   2    0.70    4.70
   8 -15   2   -0.50    4.50
  -9  15  -2   -0.90    4.30
  -9  15  -2   -5.20    5.30
   9 -15   2    6.40    4.50
   9 -15   2    4.90    5.20
 -10  15  -2   38.70    7.00
 -10  15  -2   37.30    6.00
  10 -15   2   28.60    5.80
  10 -15   2   50.79    7.60
 -11  15  -2   21.20    5.90
 -11  15  -2   26.10    5.10
  11 -15   2   14.80    4.70
  11 -15   2    9.50    5.20
 -12  15  -2   27.50    5.90
 -12  15  -2   22.20    5.00
  12 -15   2   28.70    5.10
  12 -15   2   23.50    6.20
 -13  15  -2   70.89    9.00
 -13  15  -2   64.49    8.00
  13 -15   2   50.79    7.10
  13 -15   2   63.19   10.20
 -14  15  -2    2.90    4.10
  14 -15   2    3.60    3.60
   1  14  -2    5.70    4.30
   1  14  -2    6.60    3.70
  -1 -14   2    5.70    3.70
   0  14  -2   15.90    4.30
   0  14  -2   17.50    5.40
   0 -14   2   25.80    4.80
  -1  14  -2   12.60    6.10
  -1  14  -2   28.20    5.20
   1 -14   2   24.10    5.20
  -2  14  -2   12.20    4.80
  -2  14  -2   17.30    6.40
   2 -14   2   12.40    6.40
   2 -14   2   15.30    5.20
  -3  14  -2   59.89    9.40
  -3  14  -2   69.49    9.10
   3 -14   2   70.09   10.50
   3 -14   2   45.90    7.20
  -4  14  -2   74.99    9.60
  -4  14  -2   66.99    9.90
   4 -14   2   50.19    7.60
  -5  14  -2   51.29    8.80
  -5  14  -2   45.90    6.90
  -6  14  -2   71.49   10.30
  -6  14  -2   82.99   10.00
   6 -14   2   46.00    7.60
  -7  14  -2  187.38   14.30
  -7  14  -2  183.88   16.70
   7 -14   2  167.88   14.30
  -8  14  -2   42.30    7.10
  -8  14  -2   55.79    9.50
   8 -14   2   62.19   10.10
  -9  14  -2   31.70    7.80
  -9  14  -2   32.90    6.70
   9 -14   2   54.59    7.80
   9 -14   2   52.49    8.70
 -10  14  -2   42.10    7.80
  10 -14   2   37.40    7.10
  10 -14   2   62.29    9.30
 -11  14  -2   70.69   10.80
 -11  14  -2   67.89    9.30
  11 -14   2   57.99    9.30
  11 -14   2   50.99    7.80
 -12  14  -2   15.90    5.10
 -12  14  -2   17.00    6.20
  12 -14   2   10.30    4.90
  12 -14   2   13.80    6.40
 -13  14  -2   28.50    5.40
 -13  14  -2   31.90    6.40
  13 -14   2   23.20    5.20
  13 -14   2   13.10    7.60
 -14  14  -2    9.30    4.90
 -14  14  -2   12.70    7.30
  14 -14   2   14.50    4.40
 -15  14  -2    6.20    4.30
  15 -14   2    4.50    3.70
   2  13  -2   55.29    7.10
   2  13  -2   70.99    8.90
  -2 -13   2   58.29    7.50
   1  13  -2   23.80    6.30
   1  13  -2   15.60    4.70
  -1 -13   2   26.70    5.40
   0  13  -2   -0.10    6.00
   0  13  -2   13.20    4.90
   0 -13   2   10.20    5.10
  -1  13  -2   12.50    7.00
  -1  13  -2   19.10    5.80
   1 -13   2   12.60    5.70
   1 -13   2   18.30    7.20
  -2  13  -2  197.18   17.60
  -2  13  -2  197.68   14.70
   2 -13   2  180.58   15.10
  -3  13  -2   27.80    6.50
  -3  13  -2   23.80    8.50
   3 -13   2   38.50    7.40
  -4  13  -2  116.29   11.80
  -4  13  -2   79.09   11.60
   4 -13   2  120.79   12.70
  -5  13  -2   59.19   10.20
  -5  13  -2   48.90    7.80
   5 -13   2   34.40   11.50
   5 -13   2   42.00    8.30
  -6  13  -2    4.10    7.90
  -6  13  -2   -0.80    5.90
   6 -13   2    8.70    7.20
   6 -13   2    5.70    6.10
  -7  13  -2   12.10    7.70
  -7  13  -2    4.20    5.90
   7 -13   2    6.90    7.20
   7 -13   2    8.00    6.00
  -8  13  -2   40.10    8.90
  -8  13  -2   69.19   10.10
   8 -13   2   51.79    8.60
   8 -13   2   36.10   10.90
  -9  13  -2  115.89   12.50
  -9  13  -2  130.09   15.40
   9 -13   2  130.89   12.80
 -10  13  -2   42.90    7.00
 -10  13  -2   40.80    8.40
  10 -13   2   47.10    8.70
  10 -13   2   34.50    7.20
 -11  13  -2  168.88   13.80
  11 -13   2  200.58   16.50
  11 -13   2  185.48   14.80
 -12  13  -2   18.10    5.50
 -12  13  -2   12.30    6.80
  12 -13   2   19.80    6.00
  12 -13   2   22.50    7.40
 -13  13  -2    6.80    5.60
 -13  13  -2    5.80    5.20
  13 -13   2    4.70    8.70
  13 -13   2    8.30    5.20
 -14  13  -2   26.00    5.60
 -14  13  -2   25.90    6.00
 -14  13  -2   29.40   14.00
  14 -13   2   16.80    5.10
 -15  13  -2   60.89    8.60
 -15  13  -2   50.59   13.80
  15 -13   2   58.59    8.00
   4  12  -2   61.19    7.70
   4  12  -2   60.19    7.00
  -4 -12   2   48.40    6.90
   3  12  -2   24.40    4.60
   3  12  -2   28.10    6.10
  -3 -12   2   25.90    5.20
   2  12  -2   13.70    4.60
   2  12  -2   23.00    6.40
  -2 -12   2   11.00    5.10
   1  12  -2   23.40    5.30
   1  12  -2   21.60    7.00
  -1 -12   2   13.60    5.70
   0  12  -2   15.40    7.80
   0  12  -2   12.90    5.40
   0 -12   2   14.20    6.00
  -1  12  -2   14.10    7.80
  -1  12  -2   13.00    6.00
   1 -12   2    9.50    6.40
   1 -12   2   15.50    7.50
  -2  12  -2   11.50    6.20
  -2  12  -2   23.00    8.80
   2 -12   2   13.10    8.30
   2 -12   2    3.10    6.40
   2 -12   2   19.60    6.70
  -3  12  -2  111.89   16.80
  -3  12  -2  134.89   13.20
   3 -12   2  134.69   14.30
   3 -12   2  119.49   13.30
   3 -12   2  138.39   11.80
  -4  12  -2   44.90    8.20
  -4  12  -2   60.19   10.60
   4 -12   2   41.80    8.20
   4 -12   2   48.50    8.70
   4 -12   2   49.30    7.50
  -5  12  -2   52.79   10.80
   5 -12   2   39.00    6.70
   5 -12   2   19.70    7.20
   5 -12   2   23.30    7.00
  -6  12  -2  146.89   14.20
  -6  12  -2  151.78   17.30
   6 -12   2  139.39   14.30
   6 -12   2  152.78   13.00
  -7  12  -2   41.50   10.10
  -7  12  -2   40.80    7.90
   7 -12   2   37.90    8.20
   7 -12   2   53.99    8.10
  -8  12  -2   52.69    8.50
  -8  12  -2   49.30   10.20
   8 -12   2   48.80    8.80
   8 -12   2   53.49    8.90
  -9  12  -2  147.09   13.20
  -9  12  -2  151.18   16.20
   9 -12   2  112.09   14.00
   9 -12   2  122.49   13.50
 -10  12  -2   19.30    7.70
 -10  12  -2    6.40    5.60
  10 -12   2   23.20    7.40
  10 -12   2   10.30    6.30
  10 -12   2    3.60    8.50
 -11  12  -2    6.00    6.50
 -11  12  -2    5.40    5.60
  11 -12   2    6.80    6.20
  11 -12   2    6.20    7.20
 -12  12  -2   18.90    5.90
 -12  12  -2   24.80    7.30
  12 -12   2   18.60    8.50
  12 -12   2   11.80    6.20
 -13  12  -2   20.50    5.70
 -13  12  -2   13.80    6.60
  13 -12   2   14.30    5.70
 -14  12  -2   19.90    6.00
 -14  12  -2   13.00   12.30
 -14  12  -2   19.80    5.50
  14 -12   2    5.00    5.00
 -15  12  -2    0.80   11.50
 -15  12  -2   34.00    6.20
  15 -12   2   27.70    5.70
 -16  12  -2   54.79   10.90
 -16  12  -2   43.30    6.20
  16 -12   2   60.69    7.00
   5  11  -2   55.49    6.80
   5  11  -2   52.09    8.00
  -5 -11   2   54.89    7.20
   4  11  -2   21.20    5.70
  -4 -11   2   13.80    4.80
   3  11  -2   36.40    7.70
   2  11  -2  178.48   16.20
   2  11  -2  174.08   13.00
  -2 -11   2  172.58   14.70
   1  11  -2    5.40    5.20
   1  11  -2   17.80    7.50
  -1 -11   2    6.00    6.30
   0  11  -2   27.40    8.50
   0  11  -2   29.10    6.60
   0 -11   2   24.60    7.50
   0 -11   2   24.60    9.80
  -1  11  -2  131.69   16.00
   1 -11   2  110.99   13.10
   1 -11   2  137.89   12.00
   1 -11   2  148.59   14.50
  -2  11  -2   15.40    8.60
   2 -11   2   19.10   10.10
   2 -11   2   14.50    5.90
   2 -11   2    6.70    7.10
   2 -11   2   12.40    5.10
  -3  11  -2   24.50    9.40
  -3  11  -2   16.50    7.00
   3 -11   2   25.00    6.10
   3 -11   2   11.30    9.60
   3 -11   2   18.60    7.50
   3 -11   2   15.60    5.60
  -4  11  -2  142.89   17.00
  -4  11  -2  114.39   13.20
   4 -11   2   91.09   15.50
   4 -11   2  113.99   14.10
   4 -11   2  127.39   10.40
   4 -11   2  125.19   10.90
  -5  11  -2  246.88   18.10
  -5  11  -2  226.48   20.60
   5 -11   2  250.67   15.60
   5 -11   2  253.97   19.00
   5 -11   2  243.38   15.80
  -6  11  -2  257.87   20.70
  -6  11  -2  227.98   17.70
   6 -11   2  245.08   18.50
   6 -11   2  238.28   15.60
   6 -11   2  253.77   15.80
  -7  11  -2  100.59   13.30
  -7  11  -2  120.69   13.30
   7 -11   2  126.89   11.00
   7 -11   2  142.99   14.50
  -8  11  -2   23.20    8.90
  -8  11  -2   28.00    7.40
   8 -11   2   10.60    5.60
   8 -11   2   24.20    7.70
  -9  11  -2   13.20    7.90
  -9  11  -2   13.70    6.40
   9 -11   2   16.40    7.60
   9 -11   2   12.20    6.40
 -10  11  -2  134.59   13.00
 -10  11  -2  122.69   15.40
  10 -11   2  133.89   14.20
  10 -11   2  106.39   14.40
  10 -11   2  137.99   15.40
 -11  11  -2   20.90    6.40
 -11  11  -2   28.50    8.10
  11 -11   2    8.40    8.80
  11 -11   2   28.00    7.70
  11 -11   2   25.30   11.50
 -12  11  -2   19.30    6.30
 -12  11  -2   10.30    6.90
  12 -11   2   -8.40   14.90
  12 -11   2   19.00    6.80
  12 -11   2    5.60    9.70
 -13  11  -2  189.28   13.80
 -13  11  -2  192.88   16.50
  13 -11   2  162.78   15.00
 -14  11  -2   55.39    7.20
 -14  11  -2   79.19   11.10
 -14  11  -2   67.59   13.20
  14 -11   2   39.60    7.40
 -15  11  -2   11.30    5.60
 -15  11  -2   18.40    9.90
  15 -11   2   18.10    5.80
 -16  11  -2   61.99    9.80
 -16  11  -2   58.99    8.20
  16 -11   2   42.00    6.20
   6  10  -2    7.80    4.70
   6  10  -2   14.20    4.20
  -6 -10   2   12.40    4.40
   5  10  -2   32.70    4.90
   5  10  -2   27.60    6.40
  -5 -10   2   35.00    6.00
   4  10  -2   64.99    8.00
   4  10  -2   34.80    7.50
  -4 -10   2   49.10    7.60
   3  10  -2   25.50    7.40
   3  10  -2   37.70    6.00
  -3 -10   2   35.80    7.40
   2  10  -2   12.80   11.70
   2  10  -2   20.90    5.80
   2  10  -2   16.60    7.30
  -2 -10   2   21.20    6.80
   1  10  -2  130.79   18.30
   1  10  -2  121.39   15.10
   1  10  -2  124.89   12.00
  -1 -10   2  106.59   12.10
  -1 -10   2  141.49   13.90
   0  10  -2  717.13   37.20
   0  10  -2  730.43   39.80
   0 -10   2  716.53   36.60
   0 -10   2  749.33   36.20
   0 -10   2  731.33   39.00
  -1  10  -2  310.07   23.80
  -1  10  -2  341.37   21.20
   1 -10   2  325.57   22.90
   1 -10   2  377.26   20.00
   1 -10   2  381.36   20.30
  -2  10  -2  308.97   23.70
  -2  10  -2  321.47   20.20
   2 -10   2  312.07   18.10
   2 -10   2  261.77   23.30
   2 -10   2  335.47   21.70
   2 -10   2  349.87   18.50
  -3  10  -2   13.30    9.30
   3 -10   2   10.80    4.10
   3 -10   2   -0.50    9.50
   3 -10   2   -7.00    9.70
   3 -10   2    9.70    4.10
   3 -10   2    3.30    7.60
  -4  10  -2   98.59   13.00
  -4  10  -2   68.79    9.60
   4 -10   2   90.89    8.70
   4 -10   2  100.89   15.40
   4 -10   2  115.79    9.00
   4 -10   2   96.49   13.40
  -5  10  -2   23.30    7.80
  -5  10  -2   36.00   10.10
   5 -10   2   33.30    5.30
   5 -10   2   22.30    4.90
   5 -10   2   12.60    7.90
   5 -10   2   21.10    7.90
  -6  10  -2   80.69   11.60
  -6  10  -2  107.79   13.00
   6 -10   2   86.29    8.30
   6 -10   2   94.99    8.40
   6 -10   2   83.79   13.10
  -7  10  -2   16.40    7.00
  -7  10  -2    2.10    8.20
   7 -10   2   -1.20    7.10
   7 -10   2    8.00    7.90
   7 -10   2   14.40    4.80
  -8  10  -2  332.77   21.70
  -8  10  -2  356.16   24.40
   8 -10   2  349.67   20.10
   8 -10   2  383.56   23.70
  -9  10  -2  326.47   23.00
  -9  10  -2  327.37   20.80
   9 -10   2  361.66   22.60
   9 -10   2  300.97   19.40
 -10  10  -2  705.13   38.40
 -10  10  -2  720.93   36.20
  10 -10   2  634.94   35.70
  10 -10   2  700.93   38.40
  10 -10   2  711.83   37.90
 -11  10  -2  114.79   15.50
 -11  10  -2  139.39   13.30
  11 -10   2  117.99   18.50
  11 -10   2  139.99   14.90
  11 -10   2  138.19   17.50
 -12  10  -2   14.10    6.20
 -12  10  -2   21.60    7.70
  12 -10   2   50.69   15.80
  12 -10   2    3.40    6.50
 -13  10  -2   39.00    7.10
 -13  10  -2   25.50    7.50
  13 -10   2   31.50    7.50
 -14  10  -2   64.89   12.00
 -14  10  -2   55.79    7.20
 -14  10  -2   45.60    8.20
  14 -10   2   69.69   10.90
 -15  10  -2   28.90    6.50
 -15  10  -2   49.00   10.40
  15 -10   2   40.40    7.50
 -16  10  -2   13.80    4.90
 -16  10  -2   22.10    8.30
  16 -10   2   14.40    5.30
   7   9  -2   22.00    5.40
  -7  -9   2   19.30    5.00
   6   9  -2    6.00    5.30
   6   9  -2    4.30    3.80
  -6  -9   2   10.10    5.00
   5   9  -2   31.70    7.50
   5   9  -2   36.00    5.90
  -5  -9   2   32.00    6.70
   4   9  -2  115.39   14.50
  -4  -9   2  113.49   13.20
   3   9  -2  142.69   12.20
   3   9  -2  150.58   15.70
   3   9  -2  130.19   18.60
  -3  -9   2  129.99   14.40
   2   9  -2   12.90    5.90
   2   9  -2    1.00    8.50
   2   9  -2    5.20    7.50
  -2  -9   2   -4.80    7.10
  -2  -9   2   19.90    7.60
   1   9  -2  337.97   20.30
   1   9  -2  307.27   22.90
   1   9  -2  365.16   23.70
  -1  -9   2  355.36   22.90
  -1  -9   2  322.17   19.10
  -1  -9   2  330.57   19.00
   0   9  -2   -0.60    6.20
   0   9  -2    0.50    5.90
   0   9  -2   -0.90    8.00
   0  -9   2  -11.90   15.30
   0  -9   2    5.80    4.40
   0  -9   2   -6.80    7.10
   0  -9   2    2.00    4.20
  -1   9  -2  128.29   16.00
  -1   9  -2  137.99   13.10
   1  -9   2  124.59   13.90
   1  -9   2  105.39    9.30
  -2   9  -2   83.99   12.70
   2  -9   2   63.39    9.90
   2  -9   2   77.79    7.40
   3  -9   2   37.20    7.30
   3  -9   2   32.40    4.90
   4  -9   2   86.09    9.90
   4  -9   2   78.19    7.20
   5  -9   2   73.89    7.20
   5  -9   2   86.79    6.90
   5  -9   2   54.29    9.30
   6  -9   2   38.00    5.10
   6  -9   2   28.30    5.20
   6  -9   2   29.80    6.10
  -7   9  -2   62.29   10.30
  -7   9  -2   68.89    9.50
   7  -9   2   87.29    8.10
   7  -9   2   86.49   14.10
   7  -9   2   86.89    9.90
   7  -9   2   81.99    7.40
  -8   9  -2  101.49   12.80
  -8   9  -2  143.29   13.40
   8  -9   2  116.79    9.50
   8  -9   2  105.59   11.30
   8  -9   2   99.49   14.90
  -9   9  -2    4.70    6.10
  -9   9  -2   -0.10    7.20
   9  -9   2    5.40    6.60
   9  -9   2    7.30    7.00
   9  -9   2   -1.70    4.70
 -10   9  -2  330.47   22.00
 -10   9  -2  309.27   20.10
  10  -9   2  303.27   21.30
  10  -9   2  310.27   19.60
  10  -9   2  331.37   23.70
  10  -9   2  325.97   22.00
 -11   9  -2   20.80    6.70
 -11   9  -2    4.50    7.40
  11  -9   2    6.60    7.90
  11  -9   2    6.90   10.20
  11  -9   2   16.30   10.10
 -12   9  -2  132.99   12.90
 -12   9  -2  139.69   15.40
  12  -9   2  140.79   18.30
  12  -9   2  150.98   15.40
  12  -9   2  151.18   24.30
 -13   9  -2  113.39   13.90
 -13   9  -2  121.19   12.00
 -13   9  -2  127.99   19.10
  13  -9   2   94.39   13.50
  13  -9   2   96.39   21.50
 -14   9  -2   39.80    7.90
 -14   9  -2   53.19   11.40
 -14   9  -2   36.80    7.20
  14  -9   2   31.30    7.80
 -15   9  -2    1.70    5.20
 -15   9  -2   -5.60    7.90
  15  -9   2    4.10    5.60
 -16   9  -2   13.50    5.30
 -16   9  -2   23.80    7.90
  16  -9   2   19.70    5.90
   8   8  -2   18.90    5.10
  -8  -8   2   21.10    5.10
   7   8  -2    2.00    3.90
   7   8  -2   -6.70    4.90
  -7  -8   2   -1.80    4.90
   6   8  -2   55.19    8.20
   6   8  -2   40.30    7.90
  -6  -8   2   71.99   10.80
   5   8  -2   44.30   15.40
   5   8  -2   41.10    6.30
   5   8  -2   39.60    7.90
  -5  -8   2   61.29    9.20
   4   8  -2   57.59   12.30
   4   8  -2   45.90    7.10
   4   8  -2   37.60    8.60
   4   8  -2   41.80    6.40
  -4  -8   2   48.30    9.00
   3   8  -2   18.00    4.70
   3   8  -2   20.30    5.90
   3   8  -2   22.80    8.20
   3   8  -2   28.00    8.80
  -3  -8   2   20.40    7.40
   2   8  -2  334.87   22.70
   2   8  -2  329.47   19.90
   2   8  -2  335.27   22.50
   2   8  -2  326.57   18.50
  -2  -8   2  333.37   22.20
  -2  -8   2  340.87   18.50
  -2  -8   2  326.27   18.50
   1   8  -2  140.99   13.20
   1   8  -2  107.39    9.10
   1   8  -2  114.19   15.20
   1   8  -2   96.99   11.90
  -1  -8   2  103.49   10.50
  -1  -8   2   98.99   13.70
  -1  -8   2  110.99    9.30
   0   8  -2   29.50    7.00
   0  -8   2   25.40   11.50
   0  -8   2   27.60    7.20
   0  -8   2   26.80    4.90
   0  -8   2   33.00    5.10
  -1   8  -2   52.79    8.70
   1  -8   2   68.89    9.50
   1  -8   2   56.39    6.50
   2  -8   2   -4.50    4.70
   2  -8   2    0.50    3.10
   3  -8   2  103.49    9.30
   3  -8   2   99.89    7.90
   4  -8   2  195.68   13.10
   4  -8   2  214.18   12.30
   5  -8   2   97.29    8.70
   5  -8   2   96.89    7.80
   6  -8   2    3.30    3.20
   6  -8   2    1.30    2.70
   6  -8   2   -2.60    3.70
   7  -8   2   70.09    6.50
   7  -8   2   66.69    8.00
   8  -8   2   31.20    6.10
   8  -8   2   30.20    4.60
  -9   8  -2  115.49   12.80
  -9   8  -2  117.99   14.50
   9  -8   2  110.19   11.10
   9  -8   2  118.39   13.80
   9  -8   2  112.69    9.70
 -10   8  -2  321.87   20.50
 -10   8  -2  336.37   22.80
  10  -8   2  355.36   23.10
  10  -8   2  324.47   20.00
  10  -8   2  329.37   20.90
 -11   8  -2   25.00    6.80
 -11   8  -2   15.00    7.70
  11  -8   2   24.80    8.60
  11  -8   2   21.20   11.00
  11  -8   2   23.30    8.60
 -12   8  -2   43.70    7.60
 -12   8  -2   41.90    8.90
  12  -8   2   34.30   12.90
  12  -8   2   39.90   15.10
  12  -8   2   34.30    8.70
 -13   8  -2   45.40    7.50
 -13   8  -2   49.70    9.00
 -13   8  -2   49.20   11.10
  13  -8   2    8.50   35.40
  13  -8   2   39.30    8.60
 -14   8  -2   10.70   13.30
 -14   8  -2   58.29    8.80
 -14   8  -2   44.10   10.50
  14  -8   2   47.90    8.30
 -15   8  -2    6.80    7.90
 -15   8  -2    7.90    5.50
  15  -8   2    2.60    6.20
 -16   8  -2   16.00    7.00
 -16   8  -2    5.70    5.40
  16  -8   2   18.90    5.90
   9   7  -2   15.00    4.90
  -9  -7   2   14.70    4.70
   8   7  -2    1.90    4.00
   8   7  -2    5.30    5.20
  -8  -7   2    3.80    5.00
   7   7  -2  136.29   31.90
   7   7  -2  163.28   12.10
   7   7  -2  183.48   15.50
  -7  -7   2  178.48   15.20
   6   7  -2    2.30    6.40
   6   7  -2    5.10    4.80
   6   7  -2   11.70    4.90
   6   7  -2    1.70   11.40
  -6  -7   2   18.70    7.50
   5   7  -2   29.20   11.10
   5   7  -2   22.20    8.20
   5   7  -2   32.70    5.80
   5   7  -2   37.70    6.60
  -5  -7   2   33.70    8.10
   4   7  -2  128.29   14.80
   4   7  -2  111.79   11.40
   4   7  -2  120.19    9.90
   4   7  -2  107.99   14.60
  -4  -7   2  118.99   14.60
   3   7  -2   14.00    4.10
   3   7  -2   13.50    7.00
   3   7  -2   16.40    5.80
   3   7  -2    2.20    7.70
  -3  -7   2    5.00    7.90
  -3  -7   2    5.10    8.80
  -3  -7   2    0.70    4.40
  -3  -7   2    2.40    6.30
  -3  -7   2    8.80    5.50
   2   7  -2   65.39    7.60
   2   7  -2   71.39   10.30
   2   7  -2   63.89   10.50
   2   7  -2   70.79   10.70
  -2  -7   2   77.69    8.80
  -2  -7   2   78.39    7.70
  -2  -7   2   87.89   11.80
  -2  -7   2   68.89   10.70
   1   7  -2   69.59    9.00
   1   7  -2   54.89    7.00
  -1  -7   2   71.59    9.80
  -1  -7   2   56.19    6.90
  -1  -7   2   62.49    6.60
   0   7  -2    8.40    3.90
   0   7  -2    8.10    4.20
   0  -7   2    7.30    4.40
   0  -7   2    4.40    3.30
   0  -7   2    9.20    3.50
  -1   7  -2   54.79    7.20
   1  -7   2   62.59    5.90
   1  -7   2   70.19    6.20
   1  -7   2   64.49    7.60
   2  -7   2  741.53   34.60
   2  -7   2  721.53   35.50
   3  -7   2 1235.78   55.79
   3  -7   2 1188.88   56.39
   4  -7   2 1317.67   58.49
   4  -7   2 1227.18   58.99
   5  -7   2  664.23   32.70
   5  -7   2  681.73   32.30
   6  -7   2   63.19    5.50
   6  -7   2   69.39    6.30
   6  -7   2   65.49    6.80
   7  -7   2    6.40    2.50
   7  -7   2    3.00    3.70
   8  -7   2   62.49    7.70
   8  -7   2   66.39    6.40
  -9   7  -2   69.39   10.20
  -9   7  -2   66.79    8.80
   9  -7   2   64.29    7.50
   9  -7   2   57.19    9.80
   9  -7   2   56.39    8.50
 -10   7  -2    8.20    6.50
 -10   7  -2   -7.10    6.90
  10  -7   2    6.80    5.80
  10  -7   2    4.20    5.60
  10  -7   2    7.90    6.00
  10  -7   2   16.20    8.60
 -11   7  -2   97.09   15.00
 -11   7  -2  113.09   12.30
  11  -7   2  115.19   15.00
  11  -7   2  109.39   14.20
  11  -7   2  106.99   17.40
 -12   7  -2   28.70   10.40
 -12   7  -2   45.00    8.60
 -12   7  -2   49.80    7.90
  12  -7   2   62.89   16.70
  12  -7   2   19.20    8.60
  12  -7   2   28.80   11.80
 -13   7  -2   14.70    9.60
 -13   7  -2    2.40    6.90
 -13   7  -2   -5.70    6.70
  13  -7   2   25.40   16.30
  13  -7   2   -4.00    7.20
 -14   7  -2  181.38   15.40
 -14   7  -2  196.08   18.70
  14  -7   2  162.18   16.80
 -15   7  -2    4.20    7.20
 -15   7  -2    6.00    5.60
  15  -7   2   -2.10    6.40
 -16   7  -2    5.10    6.50
 -16   7  -2   14.90    5.70
  16  -7   2   23.50    6.40
  10   6  -2    8.00    4.40
 -10  -6   2   14.50    4.70
   9   6  -2   -0.10    4.10
   9   6  -2    3.50    5.20
   9   6  -2  -24.10   14.50
  -9  -6   2    1.60    5.10
   8   6  -2   66.89   16.90
   8   6  -2   61.69    9.10
   8   6  -2   67.39    8.20
  -8  -6   2   47.30    8.10
   7   6  -2   13.80    4.90
   7   6  -2   -0.20    6.60
   7   6  -2   -6.10   15.70
   7   6  -2    0.20   10.70
   7   6  -2    4.80    4.50
  -7  -6   2   -1.10    6.30
   6   6  -2  155.68   15.60
   6   6  -2  129.69   10.50
   6   6  -2  119.69   17.00
   6   6  -2  142.89   11.50
   6   6  -2  108.19   20.60
  -6  -6   2  135.59   15.60
   5   6  -2  247.38   15.50
   5   6  -2  212.58   18.80
   5   6  -2  231.78   14.10
   5   6  -2  241.08   18.50
  -5  -6   2  210.28   19.10
   4   6  -2   86.59   10.50
   4   6  -2   92.69   13.30
   4   6  -2  100.89    8.40
   4   6  -2   96.79   11.80
  -4  -6   2   70.49   10.60
  -4  -6   2   88.29   14.20
  -4  -6   2   88.19   10.70
   3   6  -2   34.00    6.40
   3   6  -2   34.80    5.10
  -3  -6   2   28.00    7.10
  -3  -6   2   33.10    5.50
  -3  -6   2   32.20    5.20
   2   6  -2    6.20    3.50
   2   6  -2    7.60    4.30
  -2  -6   2   -1.80    3.60
  -2  -6   2    0.00    4.50
  -2  -6   2    2.60    3.50
   1   6  -2   58.49    6.50
   1   6  -2   59.49    7.50
  -1  -6   2   59.99    7.30
  -1  -6   2   56.29    5.90
  -1  -6   2   57.69    5.70
   0   6  -2    3.00    3.20
   0   6  -2   -5.80    7.00
   0  -6   2    4.10    2.90
   0  -6   2    9.80    3.80
   0  -6   2    0.70    2.40
  -1   6  -2  510.75   24.60
   1  -6   2  446.46   23.50
   1  -6   2  465.05   22.80
   1  -6   2  464.25   22.80
   2  -6   2 2903.61  129.49
   2  -6   2 2888.21  130.19
   3  -6   2  210.58   11.20
   3  -6   2  197.48   11.70
   4  -6   2 2902.01  128.99
   4  -6   2 2858.21  129.39
   5  -6   2  485.75   24.70
   5  -6   2  517.85   24.50
   6  -6   2    1.00    2.80
   6  -6   2    4.10    2.00
   6  -6   2    3.70    2.60
   7  -6   2   70.49    5.50
   7  -6   2   58.99    6.40
   8  -6   2    2.70    3.20
   8  -6   2    1.50    2.90
   9  -6   2   26.40    4.90
   9  -6   2   33.60    5.90
 -10   6  -2   64.29   10.10
 -10   6  -2   91.49   12.00
  10  -6   2   89.29   13.80
  10  -6   2   77.89   10.20
  10  -6   2  100.19    9.00
  10  -6   2   96.99   12.90
 -11   6  -2  240.98   19.40
 -11   6  -2  229.68   16.60
  11  -6   2  219.28   17.70
  11  -6   2  262.97   24.30
  11  -6   2  221.08   13.90
  11  -6   2  215.78   19.80
 -12   6  -2  131.99   17.20
 -12   6  -2  145.39   15.90
 -12   6  -2  160.58   13.70
  12  -6   2  149.79   17.20
  12  -6   2  140.59   16.90
  12  -6   2  126.29   11.30
  12  -6   2   91.19   19.00
 -13   6  -2   -8.40    8.30
 -13   6  -2   12.70    7.00
 -13   6  -2   -0.90    7.30
  13  -6   2   24.90   13.80
  13  -6   2   12.00    8.60
 -14   6  -2   64.99   10.40
 -14   6  -2   62.89    9.10
  14  -6   2   74.89   11.30
 -15   6  -2   -1.00    6.50
 -15   6  -2    2.80    5.80
  15  -6   2    4.80    6.50
 -16   6  -2   15.40    6.20
 -16   6  -2   23.30    6.70
 -16   6  -2   12.10    5.80
  16  -6   2   17.20    6.10
  16  -6   2   11.10    5.10
  11   5  -2   54.89    7.80
  11   5  -2   39.70   14.40
 -11  -5   2   65.59    8.10
  10   5  -2   36.60    6.50
  10   5  -2   26.30   13.80
  10   5  -2   40.40    5.50
 -10  -5   2   55.29    7.80
   9   5  -2   35.80   14.90
   9   5  -2   40.30    5.70
   9   5  -2   55.59    8.40
  -9  -5   2   24.10    6.80
   8   5  -2   47.30    6.70
   8   5  -2   57.39   15.80
   8   5  -2   60.69    9.20
   8   5  -2   53.09   19.40
   8   5  -2   49.70    6.80
  -8  -5   2   54.49    9.60
   7   5  -2   46.60    8.60
   7   5  -2   27.50   16.40
   7   5  -2   45.40    6.50
   7   5  -2   51.99    7.50
   7   5  -2   29.40    9.50
  -7  -5   2   36.10    9.40
  -7  -5   2   13.70    9.60
   6   5  -2  209.08   29.00
   6   5  -2  215.48   13.70
   6   5  -2  225.98   15.00
   6   5  -2  225.48   18.40
   6   5  -2  228.18   17.80
  -6  -5   2  239.88   19.40
  -6  -5   2  229.68   19.30
   5   5  -2   29.80    6.00
   5   5  -2   17.80    6.40
   5   5  -2   29.10    4.90
   5   5  -2   27.80    7.30
  -5  -5   2   15.30    7.90
  -5  -5   2   22.70    6.80
  -5  -5   2   24.20    9.20
  -5  -5   2   21.80    9.40
   4   5  -2   58.59    8.60
   4   5  -2   71.09    7.10
  -4  -5   2   81.79    8.30
  -4  -5   2   60.49   10.10
  -4  -5   2   70.49    8.00
   3   5  -2   97.29    7.60
   3   5  -2   98.39    8.70
   3   5  -2   87.59   13.90
  -3  -5   2   83.99    9.10
  -3  -5   2   85.69    7.50
  -3  -5   2   73.39    7.50
   2   5  -2  708.53   33.10
   2   5  -2  718.03   34.40
   2   5  -2  683.13   31.20
  -2  -5   2  610.44   32.30
  -2  -5   2  622.24   30.90
  -2  -5   2  597.44   31.00
   1   5  -2  456.05   24.00
   1   5  -2  403.96   25.10
  -1  -5   2  486.25   22.70
  -1  -5   2  489.35   22.70
  -1  -5   2  494.25   23.90
   0   5  -2   11.40    3.20
   0   5  -2   12.70    5.10
   0  -5   2   14.40    2.40
   0  -5   2   10.90    3.10
   0  -5   2   15.10    3.10
  -1   5  -2 1185.38   58.99
  -1   5  -2 1376.56   59.19
   1  -5   2 1290.37   57.79
   1  -5   2 1258.47   58.39
   1  -5   2 1266.67   57.79
   2  -5   2 1962.40   87.69
   2  -5   2 1922.61   87.19
   3  -5   2 1914.31   84.49
   3  -5   2 1824.22   83.99
   4  -5   2 1359.56   61.79
   4  -5   2 1347.97   61.39
   5  -5   2   19.50    3.20
   5  -5   2   14.20    2.90
   6  -5   2  487.35   22.90
   6  -5   2  478.15   23.90
   7  -5   2  732.03   34.20
   7  -5   2  743.03   35.60
   8  -5   2   93.69    7.90
   8  -5   2   83.79    6.50
   9  -5   2   81.89    8.00
   9  -5   2   71.29   10.50
   9  -5   2   59.19    7.40
 -10   5  -2   20.00    8.10
 -10   5  -2   37.20    7.50
  10  -5   2   32.80   10.20
  10  -5   2   23.30    4.90
  10  -5   2   24.30   10.00
  10  -5   2   30.00    6.30
 -11   5  -2  223.78   16.70
 -11   5  -2  199.38   20.40
 -11   5  -2  244.28   19.50
  11  -5   2  243.58   14.10
  11  -5   2  234.68   18.00
  11  -5   2  238.48   20.90
  11  -5   2  215.28   24.90
 -12   5  -2   29.40    7.90
 -12   5  -2   22.00    9.50
 -12   5  -2   29.10    8.50
  12  -5   2   42.30    9.90
  12  -5   2   17.80    9.40
 -13   5  -2   66.59   10.90
 -13   5  -2   14.20   15.60
 -13   5  -2   46.70    8.30
  13  -5   2   47.10   10.90
 -14   5  -2   45.40    9.00
 -14   5  -2   34.40    7.60
  14  -5   2   44.30   10.20
 -15   5  -2   28.20    7.70
 -15   5  -2   36.90    6.80
 -15   5  -2   34.90    7.60
  15  -5   2   26.50    7.70
 -16   5  -2   35.80   11.10
 -16   5  -2   67.39    8.90
  16  -5   2   43.00    7.30
  16  -5   2   56.59    7.70
  12   4  -2   35.30    5.30
  12   4  -2   34.70   17.30
 -12  -4   2   57.19    7.50
  11   4  -2   26.20    5.80
  11   4  -2   22.80   11.50
 -11  -4   2   26.70    6.20
  10   4  -2   64.89   13.90
  10   4  -2   44.90    6.00
  10   4  -2   49.50    7.80
 -10  -4   2   60.29    9.00
   9   4  -2  102.49   12.70
   9   4  -2  108.59    9.80
   9   4  -2   89.69   15.30
   9   4  -2   94.29   10.40
  -9  -4   2   76.79   11.30
  -9  -4   2  107.59   14.00
   8   4  -2   34.70    7.30
   8   4  -2   40.50    6.30
   8   4  -2   55.59    7.90
   8   4  -2   33.70   10.00
   8   4  -2   13.20   15.00
  -8  -4   2   34.80    8.70
  -8  -4   2   33.50    9.40
   7   4  -2  110.49    9.30
   7   4  -2  101.09   13.00
   7   4  -2  103.19   10.20
   7   4  -2  117.99   14.00
   7   4  -2  134.59   18.60
  -7  -4   2   97.59   14.40
  -7  -4   2   98.19   14.70
  -7  -4   2  100.59   14.80
   6   4  -2   78.29    7.70
   6   4  -2   78.99   10.10
   6   4  -2   83.99    9.50
   6   4  -2   74.59   10.80
  -6  -4   2   94.09   11.20
  -6  -4   2  115.79   14.60
  -6  -4   2   90.79   10.90
  -6  -4   2   99.39   13.40
   5   4  -2   72.69    8.60
   5   4  -2   70.49    7.00
  -5  -4   2   77.29    9.00
  -5  -4   2   76.09    9.90
  -5  -4   2   66.49    8.20
   4   4  -2  139.49   15.50
   4   4  -2  176.18   10.80
   4   4  -2  193.98   12.40
  -4  -4   2  185.08   11.30
  -4  -4   2  195.08   12.80
  -4  -4   2  173.28   11.00
   3   4  -2 1085.19   55.69
   3   4  -2 1178.68   54.99
  -3  -4   2 1169.98   53.29
  -3  -4   2 1202.08   54.89
  -3  -4   2 1181.48   53.59
   2   4  -2 2870.11  122.59
   2   4  -2 2640.54  122.89
  -2  -4   2 2644.34  122.09
  -2  -4   2 2680.53  121.19
   1   4  -2 1149.58   58.39
   1   4  -2 1300.07   58.29
  -1  -4   2 1320.07   57.19
  -1  -4   2 1275.17   57.99
   0   4  -2  935.81   44.60
   0   4  -2  999.70   44.50
   0  -4   2  937.31   44.10
   0  -4   2  946.91   43.40
  -1   4  -2  114.29    7.50
  -1   4  -2  103.39    7.10
   1  -4   2  115.09    6.90
   1  -4   2  111.09    6.20
   2  -4   2 2551.54  114.09
   3  -4   2  123.79    7.30
   4  -4   2  944.71   43.40
   5  -4   2 1229.58   59.39
   5  -4   2 1379.96   58.79
   6  -4   2 2816.62  125.69
   6  -4   2 2834.12  126.89
   7  -4   2 1158.68   51.99
   7  -4   2 1068.79   50.39
   8  -4   2  189.18   13.60
   8  -4   2  202.68   12.20
   8  -4   2  180.58   10.50
   9  -4   2   60.69    9.50
   9  -4   2   59.09    7.80
 -10   4  -2  119.79   16.10
 -10   4  -2   93.29   12.50
 -10   4  -2   96.89   14.40
  10  -4   2   72.89   13.50
  10  -4   2  102.69    8.70
  10  -4   2   92.39   10.30
  10  -4   2  110.99   16.10
 -11   4  -2  107.19   13.70
 -11   4  -2  117.89   16.30
 -11   4  -2   93.29   14.30
  11  -4   2  113.59   13.60
  11  -4   2  129.49    9.80
  11  -4   2  117.99    9.60
  11  -4   2   86.59   13.40
 -12   4  -2   37.50    8.60
 -12   4  -2   37.10   10.80
  12  -4   2   54.89    8.00
  12  -4   2   49.10   11.40
  12  -4   2   58.99   11.60
 -13   4  -2  118.09   14.10
 -13   4  -2  120.89   15.00
  13  -4   2  124.19   17.60
  13  -4   2  119.59   10.50
 -14   4  -2   43.50    8.10
 -14   4  -2   74.09   10.40
  14  -4   2   61.59   10.80
 -15   4  -2   25.20    8.30
 -15   4  -2   22.40    7.00
 -15   4  -2    9.30    5.70
  15  -4   2   12.60    7.50
 -16   4  -2   52.59    8.20
  16  -4   2   41.30    6.80
  16  -4   2   41.50    5.50
  12   3  -2   28.60    5.60
  12   3  -2   39.50   10.60
 -12  -3   2   16.90    5.40
  11   3  -2   47.70    7.30
  11   3  -2   74.59   13.00
 -11  -3   2   44.40    8.00
  10   3  -2   43.10    7.50
  10   3  -2   35.40    7.10
  10   3  -2   35.90    5.80
  10   3  -2   33.10   12.40
 -10  -3   2   25.50    7.50
 -10  -3   2   54.69    9.60
   9   3  -2  133.59   13.60
   9   3  -2  140.19   18.40
   9   3  -2  134.09   10.90
   9   3  -2  107.09   15.50
   9   3  -2  127.69   10.80
  -9  -3   2  149.79   15.50
  -9  -3   2  148.69   15.50
   8   3  -2   24.70   14.40
   8   3  -2   19.80    6.90
   8   3  -2   12.80    4.70
   8   3  -2   14.70    7.90
   8   3  -2   16.30    5.20
  -8  -3   2   10.10   10.30
  -8  -3   2   12.70    7.90
  -8  -3   2    8.90   10.30
  -8  -3   2   37.50    9.40
   7   3  -2   11.00    4.70
   7   3  -2    6.40    6.00
   7   3  -2    8.80    4.00
   7   3  -2    8.90   14.50
  -7  -3   2   14.60    6.90
  -7  -3   2   23.30    8.30
  -7  -3   2   11.00    7.70
  -7  -3   2    0.20    6.90
   6   3  -2   21.60   11.60
   6   3  -2   28.40    6.20
   6   3  -2   28.60    4.50
  -6  -3   2   34.10    5.80
  -6  -3   2   32.70    7.20
   5   3  -2   88.29    7.30
   5   3  -2   77.09   12.50
   5   3  -2   79.69    8.30
  -5  -3   2   94.79    8.60
  -5  -3   2   92.79    9.10
  -5  -3   2   90.79    7.80
   4   3  -2 1118.79   55.69
   4   3  -2 1233.08   55.09
  -4  -3   2 1190.88   53.79
  -4  -3   2 1120.39   53.39
  -4  -3   2 1159.68   54.79
   3   3  -2  186.28   11.10
   3   3  -2  171.98   12.20
  -3  -3   2  191.98   11.40
  -3  -3   2  183.18   10.20
   2   3  -2 1885.41   81.89
   2   3  -2 1698.03   81.99
  -2  -3   2 1840.82   80.89
  -2  -3   2 1785.32   81.69
   1   3  -2  112.19    7.00
   1   3  -2  110.49    7.50
  -1  -3   2  110.99    6.10
  -1  -3   2  100.89    6.80
   0   3  -2  494.75   23.90
   0   3  -2  493.75   23.70
   0  -3   2  518.75   22.90
   0  -3   2  486.35   23.50
  -1   3  -2    8.00    2.20
  -1   3  -2    5.50    1.80
   1  -3   2    7.10    1.30
   1  -3   2    6.40    1.80
   2  -3   2    6.70    1.80
   3  -3   2  499.35   23.40
   4  -3   2  114.79    6.80
   5  -3   2 1878.01   83.69
   5  -3   2 1837.72   82.69
   6  -3   2  199.58   10.80
   6  -3   2  179.58    9.40
   7  -3   2 1162.18   52.69
   7  -3   2 1155.28   53.59
   7  -3   2 1074.59   50.79
   8  -3   2   77.09    7.50
   8  -3   2   77.99   10.10
   9  -3   2   27.10    5.30
   9  -3   2   10.80    8.20
 -10   3  -2    9.40    9.20
 -10   3  -2   15.10    7.70
 -10   3  -2    4.30    7.80
  10  -3   2   11.30    6.20
  10  -3   2   21.70   12.00
  10  -3   2    5.90    4.20
  10  -3   2   22.10   12.10
 -11   3  -2   15.90    8.50
 -11   3  -2   27.40    9.00
 -11   3  -2   17.90    8.20
  11  -3   2   14.60    8.10
  11  -3   2   22.70    5.00
  11  -3   2   15.50   11.20
  11  -3   2   14.80    4.60
 -12   3  -2  132.79   14.90
 -12   3  -2  146.69   15.50
 -12   3  -2  110.69   16.90
  12  -3   2  127.29   11.30
  12  -3   2  122.89   19.30
  12  -3   2  108.29   17.50
  12  -3   2  128.99   10.20
 -13   3  -2   40.60    8.20
 -13   3  -2   30.00    8.30
  13  -3   2   42.70    5.90
  13  -3   2   52.59   11.40
 -14   3  -2   45.70    8.20
 -14   3  -2   39.30    7.70
 -14   3  -2   54.29    9.90
  14  -3   2   71.29   11.60
 -15   3  -2   20.90    6.10
  15  -3   2   28.10    8.10
  15  -3   2   25.50    5.10
  13   2  -2   51.79    6.80
  13   2  -2   54.59    9.40
 -13  -2   2   39.70    6.40
  12   2  -2   12.40    9.60
  12   2  -2   21.00    5.60
 -12  -2   2   15.60    6.10
  11   2  -2  190.98   14.60
  11   2  -2  182.68   12.50
  11   2  -2  147.79   19.60
 -11  -2   2  171.58   15.70
 -11  -2   2  163.38   15.40
  10   2  -2   15.80    6.20
  10   2  -2   18.40    6.10
  10   2  -2   31.90   12.20
  10   2  -2   16.40    5.10
  10   2  -2    6.90   10.50
 -10  -2   2    5.80    7.10
 -10  -2   2   14.70    7.60
   9   2  -2    2.10    8.50
   9   2  -2   24.70   12.70
   9   2  -2   16.10    5.00
   9   2  -2   18.00    5.10
  -9  -2   2   23.20    8.30
  -9  -2   2    8.80    7.50
  -9  -2   2  -10.20   11.50
  -9  -2   2   18.90   10.70
   8   2  -2  294.37   17.80
   8   2  -2  304.77   21.20
   8   2  -2  317.37   17.30
   8   2  -2  321.87   28.40
  -8  -2   2  305.57   22.10
  -8  -2   2  306.67   21.30
  -8  -2   2  331.37   23.10
  -8  -2   2  336.27   20.80
   7   2  -2   65.49    9.10
   7   2  -2   48.40   12.30
   7   2  -2   63.79    8.60
   7   2  -2   80.09    7.00
  -7  -2   2   58.69    9.10
  -7  -2   2   49.10   15.30
  -7  -2   2   62.19   11.30
  -7  -2   2   50.99    8.30
   6   2  -2    4.10    3.70
   6   2  -2    2.40    3.00
   6   2  -2   -4.10    8.40
  -6  -2   2   -1.70    4.40
  -6  -2   2   -3.30    3.50
  -6  -2   2    3.50    5.20
   5   2  -2  625.24   32.40
   5   2  -2  606.24   31.30
  -5  -2   2  695.13   33.00
  -5  -2   2  709.03   31.80
   4   2  -2 2506.25  121.79
   4   2  -2 2659.43  121.39
  -4  -2   2 2804.02  120.69
  -4  -2   2 2797.62  121.79
   3   2  -2 1770.22   80.99
   3   2  -2 1751.62   81.49
  -3  -2   2 1828.82   80.29
  -3  -2   2 1798.72   81.19
   2   2  -2 2398.46  109.69
   2   2  -2 2410.36  109.39
  -2  -2   2 2472.65  108.69
  -2  -2   2 2485.85  109.49
   1   2  -2    5.80    2.20
   1   2  -2    6.80    1.80
  -1  -2   2    8.40    2.00
  -1  -2   2    9.40    1.40
   0   2  -2  492.15   22.60
   0   2  -2  489.05   22.50
   0  -2   2  473.35   22.40
   0  -2   2  479.85   21.80
   1  -2   2 1869.21   83.29
   2  -2   2  466.25   21.50
   3  -2   2    4.90    1.40
   4  -2   2 2405.06  106.79
   4  -2   2 2378.46  105.89
   5  -2   2 1649.44   75.09
   5  -2   2 1734.03   76.39
   6  -2   2 2451.45  114.79
   6  -2   2 2472.15  112.39
   6  -2   2 2691.83  114.29
   7  -2   2  572.14   30.20
   7  -2   2  606.24   29.10
   8  -2   2    2.50    3.30
   8  -2   2    4.40    7.70
  -9   2  -2   97.59   12.80
  -9   2  -2   66.39   12.20
   9  -2   2   71.19   12.90
   9  -2   2   77.49    8.20
   9  -2   2   88.99    9.20
 -10   2  -2  322.67   22.30
 -10   2  -2  323.07   20.90
 -10   2  -2  314.67   22.40
  10  -2   2  326.37   17.60
  10  -2   2  324.17   20.50
  10  -2   2  284.97   26.40
 -11   2  -2    9.80    7.30
 -11   2  -2   10.10    7.90
 -11   2  -2   17.30    8.70
  11  -2   2   -2.80   11.80
  11  -2   2   13.80    8.40
  11  -2   2   13.20    4.50
  11  -2   2   14.00    4.50
 -12   2  -2   12.70   11.30
 -12   2  -2   12.50    6.90
 -12   2  -2   16.70    7.90
  12  -2   2   14.40    5.70
  12  -2   2    7.30   11.30
  12  -2   2   22.50   11.50
  12  -2   2    8.00    4.50
 -13   2  -2  182.88   15.90
 -13   2  -2  157.08   15.60
 -13   2  -2  149.29   16.10
  13  -2   2  176.08   11.90
  13  -2   2  194.38   20.90
 -14   2  -2   15.40    5.90
 -14   2  -2   18.30    9.50
  14  -2   2   -9.50    8.50
 -15   2  -2   52.69    8.10
  15  -2   2   59.69    7.30
  15  -2   2   41.60    8.80
  14   1  -2    7.10    7.20
  14   1  -2    5.20    4.20
 -14  -1   2    6.70    4.30
  13   1  -2   26.00    5.60
  13   1  -2   22.30    8.50
 -13  -1   2   20.50    6.00
  12   1  -2   20.60    9.80
  12   1  -2   16.50    5.50
  12   1  -2   -0.50    5.90
 -12  -1   2   17.10    6.50
 -12  -1   2    7.80    7.10
  11   1  -2    6.20   10.00
  11   1  -2   14.10    5.20
  11   1  -2    0.80    5.70
  11   1  -2   20.90    7.80
 -11  -1   2    6.30    7.00
 -11  -1   2    4.80    7.00
  10   1  -2  120.69   17.20
  10   1  -2  129.59   20.00
  10   1  -2  133.99   11.40
  10   1  -2  127.99   10.70
 -10  -1   2  115.29   14.70
 -10  -1   2  110.99   16.70
 -10  -1   2  122.19   15.90
   9   1  -2  289.67   25.80
   9   1  -2  303.67   17.80
   9   1  -2  299.67   21.50
   9   1  -2  309.97   17.40
  -9  -1   2  340.57   23.10
  -9  -1   2  316.17   22.10
  -9  -1   2  326.27   23.10
  -9  -1   2  318.07   21.50
   8   1  -2  110.09   11.40
   8   1  -2  110.19    8.50
   8   1  -2  107.99    9.70
   8   1  -2   99.09   14.40
   8   1  -2  108.89   17.20
  -8  -1   2  109.89   11.30
  -8  -1   2   97.19   15.80
  -8  -1   2   87.49   12.10
  -8  -1   2  116.19   13.90
   7   1  -2   54.59    6.40
   7   1  -2   62.89    8.00
   7   1  -2   59.29    9.90
  -7  -1   2   68.09    7.80
  -7  -1   2   61.59    8.80
   6   1  -2   45.90    7.70
   6   1  -2   53.19    5.90
   6   1  -2   64.89    6.70
  -6  -1   2   60.49    6.30
   5   1  -2  494.35   23.70
   5   1  -2  455.85   24.30
  -5  -1   2  450.85   22.90
   4   1  -2 1209.38   56.89
   4   1  -2 1253.77   56.59
  -4  -1   2 1228.98   55.99
   3   1  -2  119.29    6.90
   3   1  -2  104.89    7.20
  -3  -1   2  108.69    6.30
   2   1  -2    8.60    1.90
   2   1  -2    8.30    2.20
  -2  -1   2    7.10    1.50
   1   1  -2 1879.31   82.39
   1   1  -2 1825.62   82.29
  -1  -1   2 1808.72   82.29
  -1  -1   2 1869.21   81.79
   0   1  -2 1030.40   45.80
   0   1  -2 1070.99   46.30
   0   1  -2  993.50   46.30
   0  -1   2 1044.90   46.20
   1  -1   2 1121.69   49.99
   2  -1   2 1875.41   83.39
   3  -1   2    7.10    0.90
   3  -1   2    9.50    1.60
   4  -1   2  100.89    6.10
   4  -1   2  103.99    5.00
   4  -1   2  114.79    7.10
   5  -1   2 1122.59   53.49
   5  -1   2 1224.48   54.39
   6  -1   2  486.15   23.40
   6  -1   2  453.85   24.20
   7  -1   2   65.39    6.40
   7  -1   2   50.49    7.90
  -8   1  -2   62.29    7.60
   8  -1   2   61.89    7.30
   8  -1   2   65.49   10.50
  -9   1  -2   99.39   10.90
  -9   1  -2  107.89   15.20
  -9   1  -2  102.39   14.30
   9  -1   2  101.39   10.80
   9  -1   2  113.29    9.10
 -10   1  -2  309.97   22.30
 -10   1  -2  323.77   22.50
 -10   1  -2  329.77   21.80
  10  -1   2  324.87   21.60
  10  -1   2  316.37   17.80
  10  -1   2  336.57   17.60
  10  -1   2  299.67   27.40
 -11   1  -2  113.29   14.60
 -11   1  -2  125.09   15.20
 -11   1  -2  132.09   15.20
  11  -1   2  125.49   10.20
  11  -1   2  125.09   16.40
  11  -1   2  124.39   10.10
  11  -1   2  142.89   21.50
 -12   1  -2    5.40    7.80
 -12   1  -2   15.10    9.40
 -12   1  -2    6.00    7.20
  12  -1   2   -7.70   11.40
  12  -1   2   15.30    5.80
  12  -1   2   11.80    4.60
 -13   1  -2    9.50    8.60
 -13   1  -2   16.60    9.70
 -13   1  -2    7.00    6.30
  13  -1   2    8.90    4.50
  13  -1   2   11.30   10.30
 -14   1  -2   33.20    6.50
  14  -1   2   17.00    4.90
  14  -1   2   27.10    9.90
 -15   1  -2    5.10    4.00
  15  -1   2    0.90    3.90
  15  -1   2   -7.20    8.90
  14   0  -2   17.70    6.70
  14   0  -2   19.60    5.00
 -14   0   2   12.60    5.50
  13   0  -2    5.90    7.80
  13   0  -2    2.10    4.90
 -13   0   2   -2.70    5.50
 -13   0   2   -2.60    6.60
  12   0  -2    8.10    5.70
  12   0  -2   24.20   10.30
  12   0  -2   13.20    5.70
 -12   0   2   16.90    7.50
 -12   0   2   19.80    7.10
  11   0  -2   21.40   10.00
  11   0  -2   32.00   11.90
  11   0  -2   23.40    5.60
 -11   0   2   26.10    8.20
 -11   0   2    7.40   13.50
 -11   0   2   18.80    7.30
  10   0  -2  680.13   33.80
  10   0  -2  671.83   40.00
  10   0  -2  679.43   33.80
  10   0  -2  716.03   38.60
 -10   0   2  669.23   39.60
 -10   0   2  686.03   37.70
 -10   0   2  690.63   38.30
 -10   0   2  706.83   37.10
   9   0  -2    7.80   11.40
   9   0  -2    4.20    4.60
   9   0  -2   -3.90   13.60
   9   0  -2   -0.70    5.80
   9   0  -2    4.00    4.30
  -9   0   2   15.10    7.30
  -9   0   2   -0.30    8.10
  -9   0   2    5.40    6.50
  -9   0   2    6.70    6.70
   8   0  -2   41.70    5.90
   8   0  -2   24.70    9.80
   8   0  -2   28.50    5.80
  -8   0   2   33.60    6.10
   7   0  -2    0.60    6.00
   7   0  -2    5.90    3.60
   7   0  -2    7.70    3.30
  -7   0   2    9.00    3.80
   6   0  -2    4.60    4.30
   6   0  -2    5.60    3.00
   5   0  -2   11.30    3.70
   5   0  -2    9.00    2.60
   4   0  -2  896.61   42.50
   4   0  -2  932.61   42.20
   3   0  -2  505.35   22.60
   3   0  -2  498.55   23.50
   3   0  -2  479.75   23.20
   2   0  -2  485.65   21.10
   2   0  -2  443.06   21.40
   2   0  -2  464.55   21.50
   1   0  -2 1032.30   46.10
   1   0  -2 1007.90   46.10
   1   0  -2 1060.39   46.00
   0   0  -2    0.70    0.30
   0   0  -2   -0.20    0.40
   0   0   2    0.30    0.20
   0   0   2    0.10    0.30
  -1   0  -2 1105.59   46.70
   1   0   2 1001.80   46.80
   2   0   2  453.15   21.20
   2   0   2  476.85   21.50
   3   0   2  491.65   23.20
   3   0   2  507.85   23.70
   4   0   2  910.51   42.90
   4   0   2  937.21   42.40
   5   0   2   16.00    4.50
   5   0   2   14.80    2.80
  -6   0  -2    1.90    2.90
   6   0   2    1.40    2.50
   6   0   2    7.80    5.70
  -7   0  -2    5.00    4.00
   7   0   2    7.00    3.50
   7   0   2   -2.40    8.80
  -8   0  -2   17.30    5.40
   8   0   2   31.50    5.90
  -9   0  -2    2.40    8.30
  -9   0  -2    9.30    6.20
  -9   0  -2   -6.20    7.50
   9   0   2    3.90    4.10
   9   0   2    7.10   15.50
   9   0   2    4.80    3.10
   9   0   2   -0.80    5.50
 -10   0  -2  601.04   40.00
 -10   0  -2  692.73   36.80
 -10   0  -2  710.13   37.80
 -10   0  -2  653.23   37.30
 -10   0  -2  621.44   38.60
  10   0   2  724.03   33.30
  10   0   2  728.43   38.30
  10   0   2  697.83   33.60
  10   0   2  687.13   42.60
 -11   0  -2   21.00   10.30
 -11   0  -2   33.20    8.80
 -11   0  -2   34.70   12.10
 -11   0  -2   22.40    8.00
  11   0   2   21.20    4.80
  11   0   2   15.50    4.80
  11   0   2   24.00   10.90
  11   0   2   14.60   12.90
 -12   0  -2    1.20    8.70
 -12   0  -2    7.40    6.60
 -12   0  -2   14.80    9.50
  12   0   2   15.60    4.40
  12   0   2   12.90   11.80
  12   0   2   11.00    6.00
 -13   0  -2    5.10    5.60
  13   0   2    7.90   11.30
  13   0   2   10.70    4.60
  13   0   2    9.50    4.90
 -14   0  -2    9.30    4.60
  14   0   2   16.10   10.00
  14   0   2   15.70    4.70
  15  -1  -2   12.50    6.10
  15  -1  -2    3.00    4.90
 -15   1   2    5.00    4.50
  14  -1  -2   29.00    5.80
  14  -1  -2   37.30    7.90
 -14   1   2   15.90    7.00
 -14   1   2   32.10    6.70
  13  -1  -2   12.10    8.80
  13  -1  -2   14.90    5.60
 -13   1   2   15.30    7.20
 -13   1   2   16.80    6.70
  12  -1  -2   12.10    9.50
  12  -1  -2    7.00    6.00
 -12   1   2    5.00    6.30
 -12   1   2    6.30    7.30
  11  -1  -2  113.19   17.50
  11  -1  -2  126.89   10.90
  11  -1  -2  142.69   17.70
 -11   1   2  134.29   19.70
 -11   1   2  107.69   14.50
 -11   1   2  122.49   16.10
 -11   1   2   89.49   13.80
  10  -1  -2  331.17   24.80
  10  -1  -2  319.77   17.80
  10  -1  -2  325.97   18.00
  10  -1  -2  314.07   22.00
 -10   1   2  317.97   19.10
 -10   1   2  284.67   20.80
 -10   1   2  308.07   21.70
 -10   1   2  298.17   23.00
   9  -1  -2  109.49   17.90
   9  -1  -2  107.49    9.70
   9  -1  -2  107.89    9.10
   9  -1  -2  120.39   15.20
   9  -1  -2  111.99   11.30
  -9   1   2  136.29   12.30
  -9   1   2  121.79   14.40
  -9   1   2  115.29   11.40
  -9   1   2   80.39   12.60
   8  -1  -2   61.59    7.90
   8  -1  -2   65.89    9.20
   8  -1  -2   62.09    6.60
   7  -1  -2   64.79    6.70
   7  -1  -2   59.79    8.20
   6  -1  -2  412.46   21.90
   6  -1  -2  428.36   21.30
   5  -1  -2 1197.48   52.69
   5  -1  -2 1136.29   53.59
   5  -1  -2 1180.38   54.09
   4  -1  -2  108.89    6.80
   4  -1  -2  110.69    5.90
   4  -1  -2  107.49    6.40
   3  -1  -2    4.70    1.40
   3  -1  -2    4.80    1.70
   3  -1  -2    7.30    1.20
   2  -1  -2 1790.52   79.69
   2  -1  -2 1802.82   79.79
   1  -1  -2  880.11   43.30
   1  -1  -2 1007.60   43.50
   1  -1  -2 1035.90   43.50
  -1   1   2  981.60   43.30
   0  -1  -2 1033.90   45.40
   0  -1  -2 1021.40   45.70
   0  -1  -2 1029.30   45.50
   0   1   2  994.80   45.30
   0   1   2 1038.40   45.40
  -1  -1  -2 1819.82   82.19
  -1  -1  -2 1739.93   82.09
  -1  -1  -2 1864.91   82.39
  -1  -1  -2 1952.80   81.79
   1   1   2 1871.21   82.09
  -2  -1  -2    7.90    0.80
  -2  -1  -2    6.10    1.70
   2   1   2    5.20    1.30
  -3  -1  -2  110.99    6.80
   3   1   2  110.29    7.40
   3   1   2  111.29    6.50
  -4  -1  -2 1286.57   56.79
   4   1   2 1155.28   57.19
   4   1   2 1271.17   56.59
  -5  -1  -2  497.05   23.20
   5   1   2  473.25   22.90
   5   1   2  398.86   23.90
  -6  -1  -2   57.59    6.40
   6   1   2   48.40    9.30
   6   1   2   72.19    6.50
  -7  -1  -2   54.79    7.60
   7   1   2   58.89    7.50
  -8  -1  -2   97.19   10.70
  -8  -1  -2  109.69   14.50
  -8  -1  -2   86.29   13.10
  -8  -1  -2   89.49   11.60
   8   1   2  109.89   10.60
   8   1   2  121.59    9.40
   8   1   2  111.19    8.00
  -9  -1  -2  298.57   21.60
  -9  -1  -2  317.77   22.20
  -9  -1  -2  273.77   24.70
  -9  -1  -2  282.37   21.00
   9   1   2  293.97   21.20
   9   1   2  340.47   17.70
   9   1   2  277.87   31.20
   9   1   2  334.57   17.00
 -10  -1  -2  123.09   16.90
 -10  -1  -2  135.69   14.70
 -10  -1  -2  135.49   19.20
 -10  -1  -2  103.19   14.10
  10   1   2  124.59   19.10
  10   1   2  126.79   10.10
  10   1   2  113.99    9.40
  10   1   2  106.69   15.40
 -11  -1  -2    3.60   10.10
 -11  -1  -2   14.20    7.10
 -11  -1  -2    6.90    9.50
  11   1   2   -1.10   13.90
  11   1   2    7.70    4.10
  11   1   2    4.80    4.80
 -12  -1  -2   16.70    6.20
  12   1   2   18.10    5.70
  12   1   2   11.40    4.30
  12   1   2   21.00   12.90
  12   1   2    9.90    6.30
 -13  -1  -2   18.80    5.40
  13   1   2    6.20    4.90
  13   1   2   19.50    5.10
  13   1   2   12.60   11.80
 -14  -1  -2    5.40    4.10
  14   1   2    6.60    3.80
  15  -2  -2   58.19    8.20
  15  -2  -2   61.49    8.90
 -15   2   2   60.89    8.80
  14  -2  -2   23.00    5.60
  14  -2  -2   12.80    7.40
 -14   2   2   21.10    7.10
 -14   2   2   10.90    6.20
  13  -2  -2  173.58   18.10
 -13   2   2  149.88   14.20
 -13   2   2  175.08   16.50
  12  -2  -2   18.00   13.60
  12  -2  -2   18.10    9.30
  12  -2  -2   -8.00    6.10
 -12   2   2    5.90    6.70
 -12   2   2   12.90   13.00
 -12   2   2   13.90   13.50
 -12   2   2    6.90    8.00
  11  -2  -2    4.80    8.70
  11  -2  -2    7.40    5.40
  11  -2  -2   -3.10    9.40
 -11   2   2   15.50    6.60
 -11   2   2   17.50    9.40
 -11   2   2   10.30    7.20
 -11   2   2   25.70    9.20
  10  -2  -2  318.87   17.60
  10  -2  -2  303.47   20.70
  10  -2  -2  313.57   24.30
  10  -2  -2  311.47   17.60
  10  -2  -2  333.17   24.10
 -10   2   2  299.67   23.50
 -10   2   2  311.97   21.40
 -10   2   2  313.07   19.40
   9  -2  -2   58.69    8.80
   9  -2  -2   75.79   11.60
   9  -2  -2   68.39    7.70
  -9   2   2   92.49   13.00
  -9   2   2   75.19    9.10
   8  -2  -2   -1.70    3.80
   8  -2  -2    0.10    3.30
   8  -2  -2    3.70    5.90
   7  -2  -2  662.53   32.10
   7  -2  -2  672.23   32.90
   7  -2  -2  647.04   30.50
   6  -2  -2 2625.04  119.59
   6  -2  -2 2760.12  121.29
   6  -2  -2 2671.63  120.69
   5  -2  -2 1797.12   80.49
   5  -2  -2 1760.12   79.39
   5  -2  -2 1769.92   80.09
   4  -2  -2 2318.87  104.79
   4  -2  -2 2379.16  104.49
   3  -2  -2    6.70    1.30
   3  -2  -2    5.60    1.40
   2  -2  -2  420.96   19.50
   2  -2  -2  433.36   19.50
   1  -2  -2 1905.31   82.69
   1  -2  -2 1803.92   82.29
   1  -2  -2 1824.42   82.39
   1  -2  -2 1943.91   82.49
  -1   2   2 1808.02   82.49
   0  -2  -2  472.25   21.80
   0  -2  -2  481.35   21.60
   0  -2  -2  483.65   21.60
   0  -2  -2  473.85   21.90
   0   2   2  466.75   21.70
  -1  -2  -2    3.30    1.50
  -1  -2  -2    6.60    1.60
  -1  -2  -2    3.20    1.60
  -2  -2  -2 2492.75  111.39
  -2  -2  -2 2290.67  111.19
  -2  -2  -2 2707.93  110.39
   2   2   2 2477.15  111.29
  -3  -2  -2 1829.82   81.89
  -3  -2  -2 1738.43   81.79
  -3  -2  -2 1903.01   80.29
   3   2   2 1881.01   81.79
   3   2   2 1702.83   82.29
  -4  -2  -2 2698.33  123.59
  -4  -2  -2 2660.13  123.69
   4   2   2 2773.12  124.49
   4   2   2 2863.61  123.69
  -5  -2  -2  615.84   30.30
  -5  -2  -2  581.24   30.60
   5   2   2  654.53   32.80
  -6  -2  -2   -1.60    4.90
  -6  -2  -2    4.10    3.70
   6   2   2    7.80    3.60
  -7  -2  -2   82.29   13.30
  -7  -2  -2   73.29   11.50
  -7  -2  -2   54.89    8.70
   7   2   2   57.89    8.10
   7   2   2   67.39    8.80
   7   2   2   61.49    6.20
  -8  -2  -2  304.77   20.60
  -8  -2  -2  318.77   21.90
  -8  -2  -2  282.57   25.50
  -8  -2  -2  322.27   22.80
   8   2   2  331.47   17.90
   8   2   2  325.97   21.00
   8   2   2  323.97   17.20
  -9  -2  -2   20.90    8.00
  -9  -2  -2   23.80    9.80
  -9  -2  -2   12.30   11.70
  -9  -2  -2   12.70    8.70
   9   2   2   19.80   17.30
   9   2   2   10.70    8.40
   9   2   2   10.50    3.90
   9   2   2    9.70    4.50
 -10  -2  -2   10.10    6.50
 -10  -2  -2    8.70   12.00
 -10  -2  -2    5.00   13.80
 -10  -2  -2   11.30   11.00
  10   2   2   -7.00   10.00
  10   2   2   14.40    4.60
  10   2   2    9.60    4.50
  10   2   2   -0.50   15.70
 -11  -2  -2  186.18   15.10
  11   2   2  161.78   11.40
  11   2   2  116.69   17.90
  11   2   2  187.68   14.60
  11   2   2  172.38   12.30
 -12  -2  -2    8.90    5.50
  12   2   2   16.90    5.30
  12   2   2   22.80   14.20
  12   2   2   14.00    4.20
 -13  -2  -2   50.59    8.00
  13   2   2   53.79    7.50
  15  -3  -2   19.30    5.70
  15  -3  -2   21.80    6.70
 -15   3   2   21.60    5.80
 -15   3   2   24.10    6.70
  14  -3  -2   55.59   10.00
  14  -3  -2   58.39    7.70
 -14   3   2   64.39    9.90
 -14   3   2   77.59   12.50
  13  -3  -2   38.10    9.40
 -13   3   2   30.50    7.40
 -13   3   2   39.60    9.90
  12  -3  -2  147.49   20.40
  12  -3  -2  116.49   16.70
 -12   3   2   87.39   13.30
 -12   3   2  122.29   12.40
 -12   3   2  125.49   14.10
 -12   3   2  104.09   16.70
  11  -3  -2   20.70    8.80
  11  -3  -2   18.30   10.00
  11  -3  -2   23.90    6.10
  11  -3  -2   36.00   13.90
 -11   3   2    9.70    9.20
 -11   3   2   17.00    6.50
 -11   3   2   13.00    7.50
  10  -3  -2   12.10    5.50
  10  -3  -2   12.90    6.40
  10  -3  -2   13.60    6.20
  10  -3  -2   17.00    9.30
  10  -3  -2   -2.40    9.00
 -10   3   2    6.20    6.70
 -10   3   2    4.50    7.30
 -10   3   2   -0.10   10.60
   9  -3  -2   36.60    5.50
   9  -3  -2   25.80    7.10
   9  -3  -2   21.20    5.30
   8  -3  -2   82.69    7.00
   8  -3  -2   91.99    8.30
   8  -3  -2  101.29    9.10
   7  -3  -2 1127.39   52.29
   7  -3  -2 1184.48   53.19
   7  -3  -2 1062.09   51.09
   6  -3  -2  182.08    9.90
   6  -3  -2  192.58   10.70
   6  -3  -2  187.68   11.10
   5  -3  -2 1763.02   78.49
   5  -3  -2 1721.23   77.99
   4  -3  -2  104.19    6.10
   4  -3  -2  108.69    5.90
   3  -3  -2  482.25   22.40
   3  -3  -2  485.45   22.30
   2  -3  -2    7.60    1.30
   2  -3  -2    4.00    1.40
   2  -3  -2    6.30    1.30
   1  -3  -2    7.00    1.40
   1  -3  -2    7.50    1.40
   1  -3  -2    7.00    1.60
   1  -3  -2    5.40    1.90
  -1   3   2    4.90    1.40
   0  -3  -2  498.85   23.50
   0  -3  -2  494.15   23.20
   0  -3  -2  497.75   23.50
   0   3   2  514.95   23.40
  -1  -3  -2  111.69    6.60
  -1  -3  -2  109.89    6.60
  -1  -3  -2  113.39    7.10
   1   3   2  112.29    6.60
  -2  -3  -2 1775.52   84.59
  -2  -3  -2 1826.52   84.69
  -2  -3  -2 2089.59   83.69
   2   3   2 1818.22   84.69
  -3  -3  -2  195.08   11.40
  -3  -3  -2  219.28    9.90
  -3  -3  -2  182.68   11.50
   3   3   2  201.28   11.60
  -4  -3  -2 1207.78   55.79
  -4  -3  -2 1197.58   53.29
  -4  -3  -2 1180.78   55.89
   4   3   2 1205.38   55.99
  -5  -3  -2   98.29    9.90
  -5  -3  -2  100.29    8.70
   5   3   2  112.19    9.00
  -6  -3  -2   19.50    6.50
  -6  -3  -2   16.50    5.20
   6   3   2   29.40    5.60
  -7  -3  -2    4.40   12.40
  -7  -3  -2   -8.60    9.10
  -7  -3  -2    4.00    7.70
  -7  -3  -2    7.10    6.30
  -7  -3  -2    3.80   10.00
   7   3   2   11.30    3.50
   7   3   2    8.30    6.00
   7   3   2   10.10    4.50
  -8  -3  -2   14.30   10.60
  -8  -3  -2   10.00    8.00
  -8  -3  -2   15.90    8.10
  -8  -3  -2   12.20   11.60
   8   3   2   19.60    7.90
   8   3   2   13.60    4.10
   8   3   2   21.80    5.20
  -9  -3  -2  150.58   14.50
  -9  -3  -2  104.99   16.00
  -9  -3  -2  105.39   14.80
   9   3   2  143.39   17.20
   9   3   2  135.89   10.20
   9   3   2  137.19   10.70
 -10  -3  -2   29.70    7.50
  10   3   2   50.49    7.40
  10   3   2   51.79    8.00
  10   3   2   45.20    6.10
  10   3   2   76.09   29.60
 -11  -3  -2   66.99   10.40
  11   3   2   42.50    7.00
  11   3   2   63.89    7.40
  11   3   2   65.39    9.40
 -12  -3  -2   20.40    5.30
  12   3   2   12.40    4.90
  12   3   2   25.70    4.50
  16  -4  -2   60.99    8.70
 -16   4   2   42.50    6.90
 -16   4   2   34.80   10.30
  15  -4  -2   13.70    5.80
  15  -4  -2    6.80    6.00
 -15   4   2    7.70    7.10
 -15   4   2   25.50    5.70
  14  -4  -2   42.80    8.60
 -14   4   2   51.79   10.50
 -14   4   2   45.30    7.50
  13  -4  -2  130.79   15.30
 -13   4   2  106.39   13.10
 -13   4   2  110.89   16.80
 -13   4   2   85.99   11.90
  12  -4  -2   51.59   10.50
  12  -4  -2   65.59   17.10
  12  -4  -2   30.90   11.60
 -12   4   2   47.90    7.60
 -12   4   2   44.20    8.80
 -12   4   2   42.20   10.20
  11  -4  -2  131.19   16.10
  11  -4  -2   89.69   11.90
  11  -4  -2  113.39   17.30
  11  -4  -2   84.69   14.00
 -11   4   2  103.69   14.10
 -11   4   2  124.59   12.20
 -11   4   2   91.99   14.20
  10  -4  -2   84.29   10.90
  10  -4  -2   88.29   12.50
  10  -4  -2   99.39   15.30
 -10   4   2   57.29   14.50
 -10   4   2   79.59   11.80
 -10   4   2   89.89   11.30
   9  -4  -2   60.89    7.70
   9  -4  -2   76.09    9.40
   9  -4  -2   68.29    8.70
   8  -4  -2  184.68   10.80
   8  -4  -2  188.08   11.90
   8  -4  -2  180.78   12.70
   7  -4  -2 1113.79   52.69
   7  -4  -2 1190.68   54.29
   7  -4  -2 1159.38   53.59
   6  -4  -2 2585.44  114.79
   6  -4  -2 2548.25  115.19
   5  -4  -2 1201.38   56.29
   5  -4  -2 1279.37   56.09
   4  -4  -2  984.20   43.70
   4  -4  -2  940.91   43.80
   3  -4  -2  113.39    6.50
   3  -4  -2  119.29    6.40
   2  -4  -2 2522.45  110.39
   2  -4  -2 2274.57  110.39
   2  -4  -2 2492.35  110.09
   2  -4  -2 2598.84  110.19
   1  -4  -2  121.19    6.80
   1  -4  -2  107.89    7.30
   1  -4  -2  116.09    6.70
  -1   4   2  115.69    6.90
   0  -4  -2  976.30   44.00
   0  -4  -2  976.70   44.20
   0  -4  -2  929.21   44.30
   0   4   2  964.90   44.30
  -1  -4  -2 1263.07   56.69
  -1  -4  -2 1217.58   56.49
  -1  -4  -2 1187.68   57.09
   1   4   2 1288.37   56.89
  -2  -4  -2 2765.42  129.29
  -2  -4  -2 3162.68  128.29
  -2  -4  -2 2820.82  129.29
   2   4   2 2775.82  129.59
  -3  -4  -2 1133.09   55.79
  -3  -4  -2 1178.08   55.79
  -3  -4  -2 1256.37   54.19
   3   4   2 1235.38   56.29
  -4  -4  -2  189.28   13.30
  -4  -4  -2  204.78   12.40
   4   4   2  207.48   13.10
   4   4   2  183.88   11.00
  -5  -4  -2   69.39   10.70
  -5  -4  -2   64.89    8.40
   5   4   2   80.79    8.90
   5   4   2   69.69    6.40
  -6  -4  -2   75.99   10.60
  -6  -4  -2   90.49   11.40
   6   4   2  115.79   11.30
   6   4   2   83.99    9.70
   6   4   2   94.59    7.60
  -7  -4  -2  108.69   14.00
  -7  -4  -2  121.69   13.60
  -7  -4  -2   89.69   14.90
   7   4   2  115.79    8.70
   7   4   2  107.29    9.90
   7   4   2  111.19   13.40
  -8  -4  -2   46.30    9.00
  -8  -4  -2   42.50   19.50
  -8  -4  -2   22.20   11.40
   8   4   2   42.10   10.90
   8   4   2   29.30    7.60
   8   4   2   32.30    5.40
  -9  -4  -2   98.19   12.90
   9   4   2  116.59    9.60
   9   4   2  100.59   12.40
   9   4   2  123.09    9.80
 -10  -4  -2   40.80    7.20
  10   4   2   45.80    7.40
  10   4   2   52.19    7.20
  10   4   2   53.39    6.40
 -11  -4  -2   11.70    5.00
  11   4   2   25.30    4.30
  11   4   2   18.40    5.50
 -12  -4  -2   46.80    7.20
  12   4   2   63.09    7.70
  16  -5  -2   61.79    9.00
 -16   5   2   50.29    6.40
 -16   5   2   53.09    8.10
  15  -5  -2   39.20    6.70
  15  -5  -2   26.20    7.20
 -15   5   2   26.50   11.50
 -15   5   2   24.50    8.10
 -15   5   2   44.60    6.70
  14  -5  -2   30.00    8.10
 -14   5   2   30.40    9.50
 -14   5   2   41.00    7.60
  13  -5  -2   48.60    9.80
 -13   5   2   48.40    7.30
 -13   5   2   55.79   11.70
 -13   5   2   61.49    9.20
  12  -5  -2   25.10   14.00
  12  -5  -2   20.30    8.30
  12  -5  -2   25.90   12.10
 -12   5   2   37.70   11.40
 -12   5   2   53.19    7.70
 -12   5   2   37.30    8.70
  11  -5  -2  205.58   20.10
  11  -5  -2  226.18   18.70
  11  -5  -2  225.78   19.50
 -11   5   2  191.08   23.10
 -11   5   2  235.88   18.90
 -11   5   2  245.58   16.60
  10  -5  -2   38.20    8.80
  10  -5  -2   14.10    6.40
  10  -5  -2   38.00    9.50
 -10   5   2   11.40   20.30
 -10   5   2   28.80    7.20
 -10   5   2   17.00    7.70
   9  -5  -2   69.09    8.40
   9  -5  -2   60.79    8.90
   9  -5  -2   59.29    7.50
   8  -5  -2   86.19    8.10
   8  -5  -2   91.49    8.50
   8  -5  -2   78.19    6.90
   7  -5  -2  588.84   28.90
   7  -5  -2  597.94   28.30
   6  -5  -2  491.05   24.00
   6  -5  -2  492.45   23.60
   5  -5  -2   16.20    2.70
   5  -5  -2   19.00    2.70
   4  -5  -2 1189.68   56.39
   4  -5  -2 1177.48   56.09
   4  -5  -2 1346.07   56.19
   3  -5  -2 1734.33   84.29
   3  -5  -2 1877.01   83.59
   3  -5  -2 1849.21   83.79
   3  -5  -2 1990.80   83.69
   2  -5  -2 1870.41   82.99
   2  -5  -2 1889.41   82.79
   2  -5  -2 1950.30   82.79
   2  -5  -2 1657.33   83.19
   1  -5  -2 1287.27   57.79
   1  -5  -2 1198.08   58.09
   1  -5  -2 1307.17   57.59
  -1   5   2 1274.47   58.19
   0  -5  -2   15.20    3.10
   0  -5  -2   14.30    4.90
   0  -5  -2   13.10    2.60
   0   5   2   14.10    3.00
  -1  -5  -2  447.56   24.00
  -1  -5  -2  513.55   23.30
  -1  -5  -2  464.65   24.00
   1   5   2  532.45   24.80
  -2  -5  -2  769.52   32.40
  -2  -5  -2  718.23   33.60
  -2  -5  -2  653.23   33.60
   2   5   2  635.64   33.90
  -3  -5  -2   93.89    8.10
  -3  -5  -2   93.59    9.90
  -3  -5  -2   97.49    6.40
   3   5   2   82.49    8.30
   3   5   2   87.99    7.00
  -4  -5  -2   76.69    8.20
   4   5   2   70.49    6.50
   4   5   2   65.29    8.50
  -5  -5  -2   31.10    6.90
  -5  -5  -2   28.90    8.30
   5   5   2   32.00    8.30
   5   5   2   26.10    5.80
   5   5   2   28.10    6.50
   5   5   2   24.90    4.50
  -6  -5  -2  211.18   17.50
  -6  -5  -2  170.28   22.80
  -6  -5  -2  247.68   18.70
   6   5   2  228.88   18.00
   6   5   2  232.38   13.40
   6   5   2  217.18   14.50
   6   5   2  231.28   17.50
  -7  -5  -2   43.70    8.50
  -7  -5  -2   37.40   11.70
   7   5   2   27.90    5.10
   7   5   2   25.00    7.70
   7   5   2   35.30    6.10
   7   5   2   26.60    8.80
  -8  -5  -2   47.50    8.10
   8   5   2   38.70    5.90
   8   5   2   48.00    8.30
   8   5   2   49.80    7.30
   8   5   2   24.20   11.70
  -9  -5  -2   36.30    7.30
   9   5   2   29.10    5.40
   9   5   2   40.30    7.80
   9   5   2   41.10    5.80
 -10  -5  -2   38.90    6.40
  10   5   2   49.00    6.60
  10   5   2   34.00    6.80
  10   5   2   35.90    5.90
 -11  -5  -2   62.49    7.60
  11   5   2   64.49    8.40
  11   5   2   55.09    6.80
  16  -6  -2    7.80    5.10
 -16   6   2   15.20    7.20
 -16   6   2   18.80    5.70
  15  -6  -2    5.80    6.00
 -15   6   2   -1.40    8.30
 -15   6   2    7.40    5.20
  14  -6  -2   80.99   12.80
 -14   6   2   42.20    8.00
 -14   6   2   65.99   12.10
 -14   6   2   71.29   10.00
  13  -6  -2    3.10    7.50
  13  -6  -2  -16.70   18.70
 -13   6   2    2.20    9.90
 -13   6   2   -5.60    6.30
 -13   6   2   12.40    5.90
  12  -6  -2  167.78   16.30
  12  -6  -2  107.19   16.00
  12  -6  -2   88.99   14.50
 -12   6   2  132.99   20.80
 -12   6   2  132.59   14.90
 -12   6   2  133.89   12.70
  11  -6  -2  214.88   18.10
  11  -6  -2  200.18   18.30
  11  -6  -2  259.67   19.30
 -11   6   2  207.58   25.20
 -11   6   2  227.88   19.00
 -11   6   2  217.58   16.00
  10  -6  -2   81.49   11.30
  10  -6  -2   88.39   13.20
  10  -6  -2   99.49   12.50
  10  -6  -2   66.39    8.50
 -10   6   2   83.59   11.70
 -10   6   2   80.29   10.80
   9  -6  -2   35.30    7.10
   9  -6  -2   39.20    6.50
   9  -6  -2   26.20    4.90
   8  -6  -2    3.40    3.00
   8  -6  -2    6.90    3.70
   7  -6  -2   52.99    5.40
   7  -6  -2   55.69    6.20
   6  -6  -2   -0.20    2.10
   6  -6  -2    2.90    2.80
   5  -6  -2  480.55   22.40
   5  -6  -2  440.16   22.40
   4  -6  -2 2870.81  127.79
   4  -6  -2 2962.20  127.69
   4  -6  -2 2724.43  127.49
   3  -6  -2  199.58   11.00
   3  -6  -2  184.38   12.50
   3  -6  -2  198.08   11.20
   3  -6  -2  212.68   10.90
   2  -6  -2 2798.92  122.59
   2  -6  -2 2758.02  122.89
   2  -6  -2 2763.02  122.59
   2  -6  -2 2907.71  122.69
   2  -6  -2 2462.95  123.29
   1  -6  -2  465.25   25.90
   1  -6  -2  511.05   24.60
   1  -6  -2  549.54   24.30
   1  -6  -2  511.85   24.30
   1  -6  -2  503.15   24.60
  -1   6   2  474.35   25.20
   0  -6  -2    0.50    2.40
   0  -6  -2    6.30    3.50
   0  -6  -2   -1.40    3.10
   0  -6  -2    7.40    2.40
   0  -6  -2   19.50    6.80
   0   6   2    3.30    3.00
  -1  -6  -2   64.99    7.90
  -1  -6  -2   60.59    6.30
  -1  -6  -2   65.29    5.30
  -1  -6  -2   66.79    6.70
   1   6   2   66.49    7.10
   1   6   2   63.29    6.40
  -2  -6  -2    5.80    5.50
  -2  -6  -2   -2.20    4.70
  -2  -6  -2    1.30    3.60
  -2  -6  -2   -2.10    2.60
   2   6   2   10.00    3.50
   2   6   2   -5.30    3.50
  -3  -6  -2    3.50    7.40
   3   6   2   32.10    5.90
   3   6   2   32.70    4.40
  -4  -6  -2  100.99   13.40
  -4  -6  -2   94.49   10.60
   4   6   2   80.79   10.40
   4   6   2  103.39   11.30
   4   6   2   67.99   10.20
   4   6   2   91.09    7.80
  -5  -6  -2  211.98   18.10
  -5  -6  -2  168.48   22.30
  -5  -6  -2  264.07   18.60
   5   6   2  185.78   18.10
   5   6   2  236.48   18.20
   5   6   2  255.97   15.20
   5   6   2  234.98   13.80
  -6  -6  -2  150.48   15.20
  -6  -6  -2  130.79   18.80
   6   6   2  132.59   10.20
   6   6   2  135.09   11.40
   6   6   2  139.89   15.40
   6   6   2  125.69   16.50
  -7  -6  -2    2.80    6.00
   7   6   2    1.40    4.00
   7   6   2    8.50    4.60
   7   6   2   22.10   11.40
   7   6   2    0.80    6.50
  -8  -6  -2   63.19    9.20
   8   6   2   54.29    8.40
   8   6   2   64.59    7.90
   8   6   2   68.89    8.20
  -9  -6  -2    4.20    5.00
   9   6   2    4.90    5.40
   9   6   2   -1.20    4.50
   9   6   2   -1.50    3.40
 -10  -6  -2   15.40    4.70
  10   6   2   10.00    4.80
  10   6   2   17.40    3.90
  16  -7  -2   11.20    5.30
 -16   7   2   13.00    4.90
 -16   7   2   17.80    8.10
  15  -7  -2    2.60    5.60
 -15   7   2   -2.10    9.20
 -15   7   2    5.60    5.20
  14  -7  -2  165.98   15.80
 -14   7   2  159.58   12.80
 -14   7   2  140.99   20.50
 -14   7   2  197.48   15.70
  13  -7  -2    2.50   16.70
  13  -7  -2   14.10    7.30
 -13   7   2   11.40    5.70
 -13   7   2   -4.80   12.10
 -13   7   2    9.80    7.00
  12  -7  -2   44.60   11.80
  12  -7  -2   46.00    9.60
  12  -7  -2    3.50   13.10
 -12   7   2   24.00    7.90
 -12   7   2   31.00   13.80
 -12   7   2   39.80    7.30
  11  -7  -2  137.59   14.50
  11  -7  -2  127.69   16.30
  11  -7  -2  126.79   16.00
 -11   7   2  133.09   18.60
 -11   7   2  118.19   14.70
 -11   7   2  101.19   12.40
  10  -7  -2    5.70    7.00
  10  -7  -2   11.40    6.00
  10  -7  -2   10.40    6.60
  10  -7  -2    6.60    7.20
 -10   7   2    9.00    7.50
 -10   7   2   10.40    6.70
   9  -7  -2   80.29   11.60
   9  -7  -2   63.99    9.60
   9  -7  -2   70.49    8.10
  -9   7   2   44.90    8.20
  -9   7   2   60.69    9.70
   8  -7  -2   61.29    6.60
   8  -7  -2   63.49    7.90
   7  -7  -2    5.40    2.90
   7  -7  -2    7.30    4.00
   6  -7  -2   64.89    5.50
   6  -7  -2   59.69    6.60
   5  -7  -2  775.22   35.10
   5  -7  -2  702.23   34.90
   4  -7  -2 1213.08   55.79
   4  -7  -2 1159.58   55.59
   4  -7  -2 1256.17   55.69
   3  -7  -2 1203.08   57.19
   3  -7  -2 1151.88   58.69
   3  -7  -2 1279.77   57.39
   3  -7  -2 1346.37   57.39
   2  -7  -2  670.93   30.60
   2  -7  -2  584.44   33.00
   2  -7  -2  633.04   30.80
   2  -7  -2  654.83   31.00
   2  -7  -2  638.54   30.50
   1  -7  -2   64.09    6.00
   1  -7  -2   51.99    7.60
   1  -7  -2   65.19    6.40
   1  -7  -2   60.49    5.50
  -1   7   2   67.09    9.40
  -1   7   2   65.99    7.30
   0  -7  -2    6.20    3.30
   0  -7  -2    3.90    3.90
   0  -7  -2    6.30    2.70
   0  -7  -2   10.00    5.10
   0   7   2    1.60    3.50
   0   7   2    9.80    4.40
  -1  -7  -2   63.29    6.20
  -1  -7  -2   62.69    7.30
  -1  -7  -2   62.09    7.80
   1   7   2   57.69    8.40
   1   7   2   58.59    6.70
  -2  -7  -2   67.79    8.20
  -2  -7  -2   57.99    9.20
  -2  -7  -2   71.99    7.40
   2   7   2   80.69    7.40
   2   7   2   75.09    9.60
  -3  -7  -2    1.80    5.50
  -3  -7  -2   -4.60   11.80
  -3  -7  -2   10.50    7.20
   3   7   2    8.40    6.10
   3   7   2    0.10    5.80
   3   7   2    6.70    8.70
   3   7   2   10.10    4.00
  -4  -7  -2   97.39   14.20
  -4  -7  -2  100.59   13.90
  -4  -7  -2  125.59   13.40
   4   7   2  132.59   14.30
   4   7   2  114.79    9.50
   4   7   2  108.99   11.30
   4   7   2  141.29   15.50
  -5  -7  -2   37.10   11.70
  -5  -7  -2   31.40    8.20
   5   7   2   50.79    7.10
   5   7   2   51.89    9.80
   5   7   2   54.89    7.40
   5   7   2   59.89   11.70
  -6  -7  -2   -6.30    5.90
   6   7   2    8.80    7.30
   6   7   2    4.20    3.70
   6   7   2    6.40    4.90
   6   7   2   10.00   10.50
  -7  -7  -2  179.48   14.70
   7   7   2  158.18   12.00
   7   7   2  176.58   12.70
   7   7   2  186.88   16.00
  -8  -7  -2   -2.10    4.50
   8   7   2    5.00    5.40
   8   7   2    3.70    3.70
  -9  -7  -2   16.30    4.60
   9   7   2   29.80    5.40
   9   7   2   15.70    3.80
  16  -8  -2   12.90    5.20
 -16   8   2   15.60    5.10
 -16   8   2   27.80    9.70
  15  -8  -2    4.80    5.80
 -15   8   2   -9.30    5.30
 -15   8   2    4.00   10.00
 -15   8   2    4.20    5.20
  14  -8  -2   44.60    8.20
 -14   8   2   68.39    9.30
 -14   8   2   44.30   12.50
 -14   8   2   64.19    9.40
  13  -8  -2   48.30    9.40
  13  -8  -2   52.39   15.10
 -13   8   2   22.30   14.00
 -13   8   2   54.69    9.80
 -13   8   2   72.19    9.90
  12  -8  -2   57.39   10.20
  12  -8  -2   41.90   12.10
 -12   8   2   41.00    8.80
 -12   8   2   41.50    7.30
 -12   8   2   36.30   15.80
  11  -8  -2   14.70    7.10
  11  -8  -2   15.00    9.80
  11  -8  -2   14.90    9.10
  11  -8  -2    1.40   13.00
 -11   8   2   30.80    7.40
 -11   8   2   15.90    8.00
  10  -8  -2  319.47   21.30
  10  -8  -2  320.17   20.20
  10  -8  -2  236.48   24.10
  10  -8  -2  272.47   18.40
 -10   8   2  296.17   21.80
 -10   8   2  313.27   19.40
   9  -8  -2  118.09   10.20
   9  -8  -2   96.89   13.40
  -9   8   2  112.69   12.90
  -9   8   2  106.69   15.00
   8  -8  -2   18.90   13.30
   8  -8  -2   28.10    5.90
   8  -8  -2   19.20    4.50
   7  -8  -2   56.29    6.10
   7  -8  -2   62.29    8.30
   6  -8  -2    4.60    2.80
   6  -8  -2    1.40    4.00
   5  -8  -2   98.19    8.10
   5  -8  -2  104.79    7.50
   5  -8  -2   95.19    8.80
   4  -8  -2  199.98   11.60
   4  -8  -2  201.28   12.70
   4  -8  -2  196.68   12.10
   3  -8  -2   91.59    7.10
   3  -8  -2   88.09    9.10
   3  -8  -2   97.39    7.70
   2  -8  -2    2.60    2.70
   2  -8  -2   -2.10    5.10
   2  -8  -2    0.00    3.20
   2  -8  -2    2.80    3.50
   1  -8  -2   60.89    7.10
   1  -8  -2   66.09    7.30
   1  -8  -2   74.79    6.50
  -1   8   2   58.29    7.20
  -1   8   2   81.59    9.00
   0  -8  -2   26.20    5.30
   0  -8  -2   36.90    5.60
   0  -8  -2   38.00    5.10
   0   8   2   28.40    4.80
   0   8   2   30.60    6.70
  -1  -8  -2  115.39   10.40
  -1  -8  -2  104.09   10.70
  -1  -8  -2  111.59    9.30
  -1  -8  -2  101.99   13.40
   1   8   2  114.29   13.50
   1   8   2  108.29    8.90
   1   8   2  120.49   17.70
   1   8   2  105.39   11.90
  -2  -8  -2  326.67   20.10
  -2  -8  -2  334.67   21.50
   2   8   2  321.27   18.10
   2   8   2  320.07   23.70
   2   8   2  378.56   22.60
   2   8   2  302.27   20.20
  -3  -8  -2   27.30    8.80
  -3  -8  -2   33.90    7.80
  -3  -8  -2   25.60   10.70
   3   8   2   17.10    9.20
   3   8   2   28.10    6.40
   3   8   2   26.90    5.10
   3   8   2    7.70    8.50
  -4  -8  -2   31.40    7.50
   4   8   2   42.00    9.20
   4   8   2   45.20   11.20
   4   8   2   34.20    6.60
   4   8   2   54.49    7.40
  -5  -8  -2   34.30    7.30
   5   8   2   43.40    6.50
   5   8   2   36.20   15.70
   5   8   2   37.30    8.30
   5   8   2   50.69    6.50
  -6  -8  -2   72.89   10.30
   6   8   2   75.99    8.80
   6   8   2   67.89    9.80
  -7  -8  -2    3.30    4.90
   7   8   2    1.80    5.50
   7   8   2   -0.60    3.70
  -8  -8  -2   17.10    4.70
   8   8   2   22.00    4.00
   8   8   2    8.90    5.00
  16  -9  -2   18.60    5.20
 -16   9   2   13.90    4.90
 -16   9   2   39.30   11.00
  15  -9  -2    4.80    5.30
 -15   9   2   12.80   11.90
 -15   9   2   -0.20    5.00
 -15   9   2   -1.90    5.00
  14  -9  -2   38.30    7.70
 -14   9   2   40.10   14.40
 -14   9   2   34.50    7.70
 -14   9   2   39.80    6.40
  13  -9  -2  118.79   13.80
 -13   9   2  123.19   14.40
 -13   9   2  122.99   12.30
 -13   9   2  157.28   19.30
  12  -9  -2  132.69   18.70
  12  -9  -2  117.89   13.80
 -12   9   2   81.69   18.30
 -12   9   2  142.39   12.50
 -12   9   2  140.59   15.50
  11  -9  -2   12.90   11.30
  11  -9  -2    9.80    7.40
  11  -9  -2    8.90    9.40
  11  -9  -2   16.30    9.20
 -11   9   2   12.20    6.60
 -11   9   2    3.50    7.10
  10  -9  -2  326.47   21.30
  10  -9  -2  273.47   19.50
  10  -9  -2  301.57   23.80
 -10   9   2  340.17   22.80
 -10   9   2  335.37   20.40
   9  -9  -2    2.20    8.10
   9  -9  -2    4.50    6.90
   9  -9  -2    1.10    4.90
  -9   9   2    1.30    6.50
  -9   9   2    5.60    8.40
   8  -9  -2  124.09   10.10
   8  -9  -2   96.79   13.50
  -8   9   2  106.29   16.60
  -8   9   2  135.29   14.10
   7  -9  -2   81.29    7.80
   7  -9  -2   78.99   10.60
   6  -9  -2    9.90    6.10
   6  -9  -2   41.30    5.70
   4  -9  -2   86.49    7.20
   4  -9  -2   67.09    7.30
   3  -9  -2   36.10    5.60
   3  -9  -2   39.10    5.30
   2  -9  -2   88.59    8.00
   2  -9  -2   73.69   11.70
   2  -9  -2   71.09    7.50
   1  -9  -2  123.59    9.50
   1  -9  -2  109.29   12.90
   1  -9  -2   93.29   15.50
   1  -9  -2  105.89    9.90
   1  -9  -2  103.99   10.10
  -1   9   2  123.19   17.20
  -1   9   2  109.49   14.20
   0  -9  -2    5.10    6.60
   0  -9  -2    0.50    5.70
   0  -9  -2   -7.70    5.30
   0  -9  -2    2.40    4.70
   0  -9  -2  -12.80    8.40
   0   9   2    4.50    6.80
   0   9   2    0.80    9.20
   0   9   2   -2.30    6.00
   0   9   2    7.20    4.00
  -1  -9  -2  314.27   20.50
  -1  -9  -2  370.26   20.10
  -1  -9  -2  337.27   21.90
  -1  -9  -2  318.87   23.40
   1   9   2  334.87   23.50
   1   9   2  350.76   23.50
   1   9   2  318.27   18.50
   1   9   2  332.87   20.60
  -2  -9  -2    4.30    8.50
  -2  -9  -2   12.60    6.90
  -2  -9  -2   15.80    9.10
   2   9   2   18.70    8.60
   2   9   2   16.10    4.30
   2   9   2   22.80    9.60
   2   9   2    7.30    5.80
  -3  -9  -2  136.99   13.50
  -3  -9  -2   99.69   16.20
   3   9   2  128.09   10.50
   3   9   2  123.09   11.80
   3   9   2  135.19   18.00
   3   9   2  140.59   16.30
  -4  -9  -2  116.99   12.40
   4   9   2  122.39   11.10
   4   9   2   95.29   14.40
   4   9   2  113.79   10.00
  -5  -9  -2   33.80    6.70
   5   9   2   31.20    7.40
   5   9   2   48.00    6.50
  -6  -9  -2    0.30    4.60
   6   9   2   -1.70    3.70
   6   9   2    0.10    5.60
  -7  -9  -2   11.70    4.40
   7   9   2   18.50    3.90
   7   9   2   12.10    5.20
  16 -10  -2   16.10    4.80
 -16  10   2   27.30   13.40
 -16  10   2   17.60    5.10
  15 -10  -2   24.70    6.10
 -15  10   2   25.50   13.60
 -15  10   2   27.30    6.40
 -15  10   2   41.60    5.80
  14 -10  -2   58.19    8.70
 -14  10   2   69.19   16.40
 -14  10   2   47.50    6.80
 -14  10   2   58.99    9.30
  13 -10  -2   41.30    8.20
 -13  10   2   56.39    7.80
 -13  10   2   37.50    8.20
 -13  10   2   46.70   17.20
  12 -10  -2    6.60   11.00
  12 -10  -2   15.90    6.70
  12 -10  -2   16.90   11.30
 -12  10   2   14.40    5.90
 -12  10   2   10.00    7.50
  11 -10  -2  122.69   18.00
  11 -10  -2  131.59   16.90
  11 -10  -2  152.98   14.10
  11 -10  -2  115.19   17.20
 -11  10   2  119.29   13.10
 -11  10   2  129.99   15.80
  10 -10  -2  732.13   37.80
  10 -10  -2  639.04   36.70
  10 -10  -2  708.93   39.10
 -10  10   2  739.53   39.30
 -10  10   2  719.43   37.00
   9 -10  -2  332.97   20.60
   9 -10  -2  360.86   24.00
   9 -10  -2  366.16   22.50
  -9  10   2  334.87   21.80
  -9  10   2  320.07   23.90
   8 -10  -2  335.37   20.00
   8 -10  -2  374.16   22.30
  -8  10   2  312.27   21.70
  -8  10   2  334.37   24.00
   7 -10  -2    5.80    4.50
   7 -10  -2   19.60    7.20
  -7  10   2    6.20    7.40
  -7  10   2    7.20    9.60
   6 -10  -2   95.19    9.00
   6 -10  -2  120.69   13.30
   6 -10  -2   94.79   13.40
  -6  10   2   78.69   11.10
  -6  10   2   87.89   13.00
   5 -10  -2   24.00    5.00
   5 -10  -2   27.80    7.90
   5 -10  -2   37.80    8.70
  -5  10   2   24.10   11.00
  -5  10   2   20.00    9.10
   4 -10  -2   74.09    8.80
   4 -10  -2  103.19    8.60
   4 -10  -2   95.79   12.80
   4 -10  -2   98.49   12.70
  -4  10   2   76.39   13.50
   3 -10  -2    3.20    6.90
   3 -10  -2    3.70    4.20
   3 -10  -2    8.90    4.50
   3 -10  -2   17.10    7.40
  -3  10   2   12.90    7.90
  -3  10   2   -3.00   10.20
   2 -10  -2  322.47   18.40
   2 -10  -2  320.47   20.80
   2 -10  -2  273.27   21.10
   2 -10  -2  341.07   18.60
  -2  10   2  301.97   20.80
  -2  10   2  310.37   24.30
   1 -10  -2  317.27   19.30
   1 -10  -2  326.27   19.10
   1 -10  -2  304.37   21.00
   1 -10  -2  303.97   22.00
  -1  10   2  339.57   23.90
  -1  10   2  332.27   20.60
   0 -10  -2  698.53   35.80
   0 -10  -2  661.93   37.40
   0 -10  -2  715.73   37.00
   0  10   2  699.63   38.70
   0  10   2  695.53   36.00
  -1 -10  -2  117.69   13.40
  -1 -10  -2  107.79   13.10
   1  10   2  132.99   16.30
   1  10   2  147.89   17.60
   1  10   2  133.49   12.60
  -2 -10  -2   -1.90    9.20
  -2 -10  -2    9.10    6.40
   2  10   2    9.80    6.00
   2  10   2   22.60    8.40
   2  10   2    6.80   12.00
   3  10   2   37.40    6.20
   3  10   2   30.80    8.40
  -4 -10  -2   60.89    9.40
   4  10   2   56.89    7.90
   4  10   2   44.80    8.30
  -5 -10  -2   37.70    6.00
   5  10   2   27.90    7.30
   5  10   2   44.90    6.60
  -6 -10  -2   16.10    4.50
   6  10   2   16.10    3.90
   6  10   2   12.60    5.00
  16 -11  -2   68.99    8.50
 -16  11   2   65.99    8.40
  15 -11  -2   19.00    5.40
 -15  11   2   22.00    6.20
 -15  11   2   18.20    5.00
  14 -11  -2   76.99   10.30
 -14  11   2   59.19    8.70
 -14  11   2   42.80    8.10
  13 -11  -2  178.98   15.00
 -13  11   2  179.48   16.40
 -13  11   2  157.78   13.40
  12 -11  -2   19.80    9.30
  12 -11  -2   23.10    6.70
  12 -11  -2    0.70   11.60
 -12  11   2   16.30    7.60
  11 -11  -2   18.80   10.50
  11 -11  -2   22.80    7.30
  11 -11  -2   25.10   11.20
  11 -11  -2   30.60    9.40
 -11  11   2   16.30    6.20
 -11  11   2   27.70    8.40
  10 -11  -2  108.89   14.60
  10 -11  -2  132.09   13.80
  10 -11  -2  151.48   16.00
 -10  11   2  148.79   16.60
 -10  11   2  124.99   13.40
   9 -11  -2    0.90    6.30
   9 -11  -2    6.30    7.20
   9 -11  -2   13.20    6.80
  -9  11   2   20.20    8.70
  -9  11   2   20.10    7.00
   8 -11  -2   37.90    8.20
  -8  11   2   36.50    8.20
  -8  11   2   21.70    9.20
   7 -11  -2  123.49   14.00
   7 -11  -2  119.19   11.40
  -7  11   2  121.29   13.90
  -7  11   2  115.69   17.70
   6 -11  -2  252.67   18.30
   6 -11  -2  228.38   15.90
   6 -11  -2  232.58   18.00
  -6  11   2  228.58   18.40
  -6  11   2  245.18   21.00
   5 -11  -2  245.98   17.70
   5 -11  -2  218.58   17.70
   5 -11  -2  221.58   15.20
  -5  11   2  240.18   21.10
  -5  11   2  221.68   18.20
   4 -11  -2  120.69   14.40
   4 -11  -2  114.49   13.60
   4 -11  -2  121.09   11.30
  -4  11   2  113.39   13.70
  -4  11   2   99.89   13.80
   3 -11  -2   24.40    8.40
   3 -11  -2   23.90    6.20
   3 -11  -2   26.80    7.40
  -3  11   2   23.40   10.10
   2 -11  -2   18.10    7.00
   2 -11  -2   13.20    7.70
   2 -11  -2   18.60    7.10
  -2  11   2   11.70    6.60
  -2  11   2   10.90    9.30
   1 -11  -2  107.69   14.50
   1 -11  -2   97.19   14.20
   1 -11  -2  138.79   13.50
  -1  11   2  132.59   17.30
  -1  11   2  137.19   13.00
   0 -11  -2   16.90    6.60
   0 -11  -2    1.10    9.10
   0 -11  -2   16.10    7.60
   0  11   2   26.80    6.30
   0  11   2   23.10    9.00
  -1 -11  -2    0.70    8.30
  -1 -11  -2   14.90    6.20
   1  11   2    1.30    5.30
   1  11   2    7.00    7.70
  -2 -11  -2  175.98   14.20
   2  11   2  207.08   17.20
   2  11   2  166.78   13.40
  -3 -11  -2   67.89    9.30
   3  11   2   39.20    7.80
   3  11   2   56.59    8.30
  -4 -11  -2   16.10    5.10
   4  11   2   18.80    4.40
   4  11   2   14.50    6.10
  -5 -11  -2   53.79    7.00
   5  11   2   62.19    8.90
  16 -12  -2   50.99    6.90
 -16  12   2   65.29    8.00
  15 -12  -2   26.80    5.50
 -15  12   2   13.90    5.50
 -15  12   2   26.10    4.90
  14 -12  -2    9.60    5.10
 -14  12   2   18.70    5.10
 -14  12   2   18.00    6.30
  13 -12  -2   28.20    6.60
  13 -12  -2   16.70    9.20
 -13  12   2   11.80    6.60
 -13  12   2   18.10    5.50
  12 -12  -2   21.60    6.50
  12 -12  -2   10.80    7.70
 -12  12   2   25.10    6.10
 -12  12   2   12.10    7.10
  11 -12  -2   17.60    7.50
  11 -12  -2   14.50    6.40
  11 -12  -2    6.50   10.40
 -11  12   2   13.80    6.00
 -11  12   2   14.40    7.40
  10 -12  -2   -4.40    9.50
  10 -12  -2    6.00    7.20
  10 -12  -2   13.20    6.40
 -10  12   2    9.00    7.40
 -10  12   2   20.80    6.80
   9 -12  -2  130.09   14.20
   9 -12  -2  144.49   15.20
   9 -12  -2  153.28   14.00
  -9  12   2  149.79   16.80
  -9  12   2  128.49   13.70
   8 -12  -2   46.40    9.10
   8 -12  -2   42.30    7.80
   8 -12  -2   41.20    8.70
  -8  12   2   48.90    8.40
  -8  12   2   41.00   10.30
   7 -12  -2   34.60    7.70
   7 -12  -2   25.60    7.00
  -7  12   2   45.40    8.60
  -7  12   2   60.89   11.10
   6 -12  -2  137.89   13.30
   6 -12  -2  134.49   14.10
  -6  12   2  136.89   14.60
  -6  12   2  139.29   18.70
   5 -12  -2   42.60    8.10
   5 -12  -2   31.30    8.00
   5 -12  -2   49.30    8.60
  -5  12   2   46.80    8.60
  -5  12   2   37.90   10.60
   4 -12  -2   64.69    9.80
   4 -12  -2   58.09    9.00
   4 -12  -2   42.80    8.10
  -4  12   2   45.20   10.80
  -4  12   2   50.39    8.80
   3 -12  -2  133.99   14.00
   3 -12  -2  134.69   14.60
   3 -12  -2  123.19   14.80
  -3  12   2  153.98   14.10
  -3  12   2  147.99   18.40
   2 -12  -2   15.70    8.70
   2 -12  -2   16.20    6.60
   2 -12  -2   14.30    7.90
  -2  12   2    3.40    8.90
   1 -12  -2   18.80    8.30
   1 -12  -2   10.30    6.20
   1 -12  -2   12.50    8.20
  -1  12   2    0.60    8.30
   0 -12  -2   19.80    8.60
   0 -12  -2   -9.20    9.00
   0 -12  -2    8.70    5.90
   0  12   2   11.70    5.70
   0  12   2   13.00    8.00
  -1 -12  -2   13.80    5.50
   1  12   2   14.60    5.20
   1  12   2   22.50    7.60
  -2 -12  -2   28.60    5.50
   2  12   2   23.90    7.10
  -3 -12  -2   22.90    5.00
   3  12   2   26.20    6.30
   4  12   2   43.60    6.30
   4  12   2   45.20    6.50
  15 -13  -2   61.59    7.70
 -15  13   2   56.79    7.30
 -15  13   2   55.79    8.60
  14 -13  -2   25.00    5.40
 -14  13   2   26.80    5.20
 -14  13   2   31.10    6.40
  13 -13  -2    4.60    4.80
  13 -13  -2    4.90    7.90
 -13  13   2    4.00    5.90
 -13  13   2    6.00    4.60
  12 -13  -2   10.70    5.20
  12 -13  -2    9.50    7.00
 -12  13   2   13.70    6.70
 -12  13   2    9.50    5.10
  11 -13  -2  168.28   14.30
  11 -13  -2  167.58   15.90
 -11  13   2  202.88   14.60
 -11  13   2  185.48   16.80
  10 -13  -2   64.19    9.60
  10 -13  -2   51.89    8.00
 -10  13   2   42.40    8.90
 -10  13   2   31.60    6.70
   9 -13  -2  127.89   14.20
   9 -13  -2  116.99   12.20
  -9  13   2  115.79   12.80
  -9  13   2  100.19   15.70
   8 -13  -2   22.20    9.40
   8 -13  -2   87.99   12.10
   8 -13  -2   51.99    8.10
  -8  13   2   52.59    8.50
  -8  13   2   55.89   10.10
   7 -13  -2    2.90    5.90
   7 -13  -2   -0.70    7.60
   7 -13  -2   -1.90    6.30
  -7  13   2    5.40    8.40
  -7  13   2   -5.50    6.10
   6 -13  -2    5.20    6.00
   6 -13  -2   19.60    7.10
   6 -13  -2   10.90    7.60
  -6  13   2   10.30    8.60
  -6  13   2   -2.60    6.00
   5 -13  -2   72.09   10.90
   5 -13  -2   59.19    9.50
   5 -13  -2   51.69   11.90
  -5  13   2   40.30   10.10
  -5  13   2   44.60    7.90
   4 -13  -2  103.99   11.80
   4 -13  -2   92.89   13.10
   4 -13  -2  115.29   13.10
  -4  13   2  117.49   13.00
  -4  13   2   83.09   12.30
   3 -13  -2   39.50    8.30
   3 -13  -2   47.40    7.70
   3 -13  -2   26.00    7.20
  -3  13   2   27.10    9.30
  -3  13   2   51.29    8.20
   2 -13  -2  164.18   15.80
   2 -13  -2  185.88   13.90
   2 -13  -2  158.58   15.10
  -2  13   2  186.88   14.40
  -2  13   2  191.08   17.90
   1 -13  -2   -8.20    7.40
   1 -13  -2   14.70    5.70
  -1  13   2   14.40    5.60
  -1  13   2    7.60    7.40
   0 -13  -2    6.50    5.30
   0  13   2    0.80    4.50
   0  13   2    6.50    6.70
  -1 -13  -2   32.90    5.40
   1  13   2   27.80    7.00
   1  13   2   20.70    4.80
   2  13   2   66.09    7.40
   2  13   2   58.69    7.90
  15 -14  -2    1.30    3.60
 -15  14   2    2.40    8.60
 -15  14   2    5.10    4.50
  14 -14  -2   16.70    4.40
 -14  14   2   14.20    5.50
 -14  14   2   15.50    4.40
  13 -14  -2   26.60    7.00
  13 -14  -2   30.60    5.40
 -13  14   2   26.70    5.20
 -13  14   2   24.50    6.10
  12 -14  -2   16.50    4.90
  12 -14  -2   11.60    6.10
 -12  14   2    1.20    5.90
 -12  14   2   11.90    5.10
  11 -14  -2   61.39    8.90
  11 -14  -2   41.20    7.10
 -11  14   2   35.70    7.80
  10 -14  -2   55.29    8.90
  10 -14  -2   54.89    8.80
 -10  14   2   63.59    9.60
 -10  14   2   60.79    9.50
   9 -14  -2   32.00    7.40
   9 -14  -2   37.50    6.40
  -9  14   2   37.40    6.70
  -9  14   2   34.10    8.40
   8 -14  -2   48.70    8.10
   8 -14  -2   65.69    9.60
  -8  14   2   41.80    7.10
  -8  14   2   53.49    9.70
   7 -14  -2  187.38   14.10
   7 -14  -2  196.18   16.00
  -7  14   2  181.58   14.60
  -7  14   2  183.98   17.60
   6 -14  -2   58.59    7.90
   6 -14  -2   30.20    6.90
  -6  14   2   43.00    7.30
  -6  14   2   58.69   10.20
   5 -14  -2   45.70    7.80
   5 -14  -2   48.10    7.00
  -5  14   2   36.00    9.10
  -5  14   2   28.90    6.70
   4 -14  -2   36.60    7.40
   4 -14  -2   59.79    7.50
  -4  14   2   73.69   10.30
  -4  14   2   59.49    9.80
   3 -14  -2   56.99    8.40
   3 -14  -2   58.79    9.10
  -3  14   2   72.99   10.10
  -3  14   2   79.19   10.00
   2 -14  -2   22.30    7.20
   2 -14  -2   14.40    5.00
  -2  14   2   35.30    7.70
  -2  14   2   15.70    5.60
   1 -14  -2   26.20    5.20
  -1  14   2   28.10    6.90
  -1  14   2   26.70    5.30
   0  14   2   17.50    6.00
   0  14   2   15.40    4.50
   1  14   2    5.00    3.50
   1  14   2    7.50    4.90
  14 -15  -2    1.70    3.50
 -14  15   2    4.80    4.50
 -14  15   2    8.10    3.80
  13 -15  -2   44.60    7.10
  13 -15  -2   65.29    7.10
 -13  15   2   51.99    7.10
 -13  15   2   56.59    7.10
  12 -15  -2   10.90    5.50
  12 -15  -2   25.20    5.00
 -12  15   2   39.70    6.50
 -12  15   2   29.20    5.20
  11 -15  -2   26.20    6.20
  11 -15  -2   24.50    5.10
 -11  15   2   14.60    4.70
 -11  15   2   19.60    6.20
  10 -15  -2   42.20    6.90
  10 -15  -2   34.20    5.50
 -10  15   2   42.20    7.80
 -10  15   2   23.10    5.50
   9 -15  -2    6.70    4.60
   9 -15  -2   -3.80    4.10
  -9  15   2    1.50    4.60
  -9  15   2   11.70    6.40
   8 -15  -2   -0.60    4.50
   8 -15  -2    1.90    4.30
  -8  15   2    9.60    5.10
  -8  15   2    9.50    6.60
   7 -15  -2    7.50    4.70
   7 -15  -2    8.00    5.00
  -7  15   2   -1.60    6.40
  -7  15   2   -1.90    4.60
   6 -15  -2   -0.80    4.70
   6 -15  -2    7.40    5.20
  -6  15   2    7.40    6.50
  -6  15   2    4.20    4.60
   5 -15  -2   54.99    8.10
   5 -15  -2   40.50    5.70
  -5  15   2   37.40    7.90
  -5  15   2   39.80    6.40
   4 -15  -2   20.00    5.00
   4 -15  -2   11.90    5.40
  -4  15   2   13.70    4.70
  -4  15   2   24.80    6.90
   3 -15  -2   29.30    6.80
  -3  15   2   27.50    5.20
  -3  15   2   41.80    7.40
  -2  15   2   57.09    7.20
  -2  15   2   70.09    7.90
  -1  15   2    4.70    4.90
  -1  15   2    6.00    3.60
  12 -16  -2   52.59    7.40
 -12  16   2   45.20    6.30
 -12  16   2   46.20    6.60
  11 -16  -2   52.89    8.10
  11 -16  -2   49.30    6.70
 -11  16   2   63.39    7.30
 -11  16   2   51.69    7.10
  10 -16  -2    7.30    4.30
  10 -16  -2    9.20    4.20
 -10  16   2   21.50    4.60
 -10  16   2   10.50    5.40
   9 -16  -2   10.70    4.30
   9 -16  -2   17.80    5.10
  -9  16   2   27.20    6.30
  -9  16   2   11.20    4.20
   8 -16  -2   16.30    5.10
   8 -16  -2   16.00    4.30
  -8  16   2   14.50    4.40
  -8  16   2   20.40    6.30
   7 -16  -2   25.20    5.50
  -7  16   2   22.60    6.20
  -7  16   2   25.30    5.00
   6 -16  -2   17.20    5.20
  -6  16   2   14.80    4.30
  -6  16   2   16.10    6.00
   5 -16  -2   47.40    6.60
  -5  16   2   51.59    7.20
  -5  16   2   63.29    7.30
   4 -16  -2   44.30    6.70
  -4  16   2   57.09    8.80
  -4  16   2   65.99    7.10
  -4  16  -3    6.20    3.80
  -4  16  -3    1.50    4.50
   4 -16   3    4.80    4.70
   4 -16   3    7.90    3.60
  -5  16  -3   19.40    5.40
  -5  16  -3   14.60    4.40
   5 -16   3   19.10    4.90
   5 -16   3   20.80    4.30
  -6  16  -3    4.00    4.90
  -6  16  -3    5.00    3.90
   6 -16   3    5.30    4.20
   6 -16   3    8.70    4.10
  -7  16  -3   -2.00    4.90
  -7  16  -3   -1.70    3.70
   7 -16   3    0.70    3.40
   7 -16   3    1.00    3.90
  -8  16  -3   11.80    5.10
  -8  16  -3    8.90    4.20
   8 -16   3   10.90    4.20
   8 -16   3   17.50    4.90
  -9  16  -3   -4.50    4.50
  -9  16  -3   -2.50    3.90
   9 -16   3    0.70    3.40
   9 -16   3    1.70    3.70
 -10  16  -3    5.00    4.50
 -10  16  -3    8.50    4.20
  10 -16   3    1.50    3.70
  10 -16   3    4.90    3.90
 -11  16  -3   15.80    4.70
 -11  16  -3   17.30    4.60
  11 -16   3   11.40    4.40
  11 -16   3   19.00    4.20
 -12  16  -3    3.20    4.40
  12 -16   3    0.50    3.30
  12 -16   3   -0.70    4.30
  -1  15  -3   34.80    5.40
  -1  15  -3   40.40    6.00
   1 -15   3   33.70    4.50
  -2  15  -3   11.70    3.90
  -2  15  -3   12.50    4.90
   2 -15   3    4.70    4.00
   2 -15   3    9.30    7.00
  -3  15  -3  119.39    9.20
  -3  15  -3  101.49   10.80
   3 -15   3   96.19    9.00
   3 -15   3   95.29   10.20
  -4  15  -3   16.90    4.80
  -4  15  -3   20.20    6.30
   4 -15   3   19.30    4.90
   4 -15   3   18.10    5.80
  -5  15  -3   11.40    4.70
  -5  15  -3    9.70    6.10
   5 -15   3   15.20    5.30
   5 -15   3   15.40    5.00
  -6  15  -3   57.89    8.50
  -6  15  -3   59.19    8.90
   6 -15   3   71.89    9.00
   6 -15   3   73.49    9.70
  -7  15  -3   37.60    7.50
  -7  15  -3   36.60    6.10
   7 -15   3   58.99    9.00
  -8  15  -3   67.09    8.80
  -8  15  -3   54.69    8.30
   8 -15   3   59.69    9.00
   8 -15   3   39.80    6.70
  -9  15  -3   60.19    8.50
  -9  15  -3   76.49   11.00
   9 -15   3   67.59    9.60
   9 -15   3   59.39    8.70
 -10  15  -3   13.70    5.60
 -10  15  -3   16.20    5.00
  10 -15   3    8.00    4.70
  10 -15   3    9.10    4.60
 -11  15  -3   10.80    4.80
 -11  15  -3   19.70    5.70
  11 -15   3   14.10    5.40
 -12  15  -3  112.19   10.70
 -12  15  -3   88.99    8.90
  12 -15   3  102.09   10.70
  12 -15   3  106.99    9.30
 -13  15  -3    3.00    4.50
 -13  15  -3    8.00    6.70
  13 -15   3   20.20    6.60
 -14  15  -3   35.90    5.40
  14 -15   3   31.80    4.80
   1  14  -3   28.10    5.20
   1  14  -3   38.00    4.70
  -1 -14   3   33.60    4.40
   0  14  -3   -1.60    4.70
   0  14  -3    1.40    3.80
   0 -14   3   -7.00    3.90
  -1  14  -3   77.79   10.60
  -1  14  -3   82.59    8.80
   1 -14   3   77.59    9.00
  -2  14  -3   31.80    5.60
  -2  14  -3   14.50    6.30
   2 -14   3   25.70    5.70
   2 -14   3   27.60    7.00
  -3  14  -3   16.30    5.40
  -3  14  -3   24.00    7.30
   3 -14   3   21.90    6.00
  -4  14  -3   15.70    5.20
  -4  14  -3   12.40    6.70
   4 -14   3   12.50    5.60
  -5  14  -3    9.90    5.20
  -5  14  -3    5.60    6.90
   5 -14   3    7.70    5.40
  -6  14  -3   65.39   10.10
  -6  14  -3   63.49    9.90
   6 -14   3   81.09   10.80
  -7  14  -3   67.29   10.50
  -7  14  -3   67.59    9.90
   7 -14   3   68.19   10.40
  -8  14  -3   81.99   10.30
   8 -14   3   73.39   10.70
  -9  14  -3   10.00    5.40
  -9  14  -3    8.00    6.40
   9 -14   3   11.50    5.40
   9 -14   3   13.20    5.30
 -10  14  -3   11.30    6.20
 -10  14  -3   16.00    5.20
  10 -14   3   15.50    6.40
  10 -14   3   15.80    5.60
 -11  14  -3   12.30    5.30
 -11  14  -3   23.10    6.70
  11 -14   3   14.20    5.30
  11 -14   3   20.40    6.70
 -12  14  -3   30.00    5.70
 -12  14  -3   24.10    6.60
  12 -14   3   24.80    5.60
  12 -14   3   16.40    6.40
 -13  14  -3   75.09   10.30
 -13  14  -3   84.49    9.00
  13 -14   3   81.09   12.70
  13 -14   3   72.09    8.90
 -14  14  -3    0.20    4.60
  14 -14   3    3.90    3.90
 -15  14  -3   33.00    5.50
  15 -14   3   40.60    6.40
   2  13  -3    9.00    4.10
   2  13  -3    1.80    4.40
  -2 -13   3   16.90    4.40
   1  13  -3   69.39   10.60
   1  13  -3   86.39    8.60
  -1 -13   3   71.59    8.80
   0  13  -3    0.00    5.90
   0  13  -3    8.00    4.60
   0 -13   3    3.00    9.20
   0 -13   3    7.10    5.00
  -1  13  -3   13.40    5.50
  -1  13  -3   17.00    6.80
   1 -13   3   11.30    5.70
  -2  13  -3    1.70    6.60
  -2  13  -3    4.50    5.30
   2 -13   3    3.20    5.60
  -3  13  -3   17.10    6.10
  -3  13  -3   13.80    7.80
   3 -13   3    5.20    6.00
  -4  13  -3   37.50    7.30
  -4  13  -3   29.30    9.00
   4 -13   3   51.29    8.50
  -5  13  -3   36.50    7.30
  -5  13  -3   41.30    9.40
   5 -13   3   44.10    8.20
  -6  13  -3   95.59   11.80
  -6  13  -3   83.69   11.60
   6 -13   3   94.29   12.10
  -7  13  -3  103.19   15.20
  -7  13  -3  101.69   12.00
   7 -13   3  110.09   12.70
   7 -13   3   89.29   13.40
  -8  13  -3   30.00    8.40
  -8  13  -3   24.90    6.30
   8 -13   3   48.70    8.10
  -9  13  -3   40.20    7.60
  -9  13  -3   50.29    9.20
   9 -13   3   29.80    7.40
 -10  13  -3   15.90    6.00
 -10  13  -3   18.60    7.00
  10 -13   3   10.50    6.10
  10 -13   3    8.10    6.00
 -11  13  -3    5.20    5.90
 -11  13  -3    6.40    5.40
  11 -13   3    8.00    5.60
  11 -13   3    2.80    6.80
 -12  13  -3   15.90    6.70
 -12  13  -3   15.70    5.50
  12 -13   3   14.80    7.20
  12 -13   3   12.60    5.70
 -13  13  -3   14.40    5.90
 -13  13  -3   12.50    5.30
  13 -13   3    7.90    5.10
  13 -13   3    2.30    9.00
 -14  13  -3   83.89   14.20
 -14  13  -3   67.39    9.90
  14 -13   3   78.29    9.30
 -15  13  -3   14.00   11.00
 -15  13  -3   12.10    5.00
  15 -13   3    8.10    4.20
   4  12  -3    2.70    4.10
   4  12  -3    2.00    4.10
  -4 -12   3   -1.30    3.50
   3  12  -3  100.99   10.70
   3  12  -3  100.29    8.70
  -3 -12   3  107.79    9.70
   2  12  -3   28.10    6.60
   2  12  -3   23.60    5.10
  -2 -12   3   22.80    5.70
   1  12  -3   18.00    5.00
   1  12  -3   17.20    6.90
  -1 -12   3   12.90    5.70
   0  12  -3   22.20    7.80
   0  12  -3   18.60    5.90
   0 -12   3   18.20    6.70
  -1  12  -3  230.78   16.00
  -1  12  -3  227.98   19.20
   1 -12   3  225.18   17.30
   1 -12   3  221.98   16.50
  -2  12  -3   72.29   10.10
  -2  12  -3   57.29   10.00
   2 -12   3   44.10    7.20
   2 -12   3   39.90    8.20
   2 -12   3   44.30    8.70
  -3  12  -3  126.09   13.00
  -3  12  -3  126.09   16.10
   3 -12   3  120.19   11.60
   3 -12   3  123.79   13.80
   3 -12   3  109.69   12.50
  -4  12  -3   12.40    6.60
  -4  12  -3   -3.30    7.90
   4 -12   3   19.90    6.10
   4 -12   3   20.30    7.90
   4 -12   3   22.10    6.70
  -5  12  -3   67.29    9.20
  -5  12  -3   71.59   11.10
   5 -12   3   75.29    8.80
   5 -12   3   73.99   10.30
   5 -12   3   86.49   12.00
  -6  12  -3   41.80    8.20
  -6  12  -3   53.79   10.50
   6 -12   3   40.20    8.60
   6 -12   3   37.90    6.50
   6 -12   3   38.20    7.00
  -7  12  -3   78.99   11.70
  -7  12  -3   74.19   11.30
   7 -12   3   61.59    8.60
   7 -12   3   78.09   12.30
  -8  12  -3   27.00    8.80
  -8  12  -3   21.40    6.60
   8 -12   3   13.00    7.10
   8 -12   3    8.70    6.50
  -9  12  -3  119.29   15.00
  -9  12  -3  126.49   12.60
   9 -12   3  134.59   14.00
   9 -12   3  114.09   13.70
 -10  12  -3   55.79    9.70
 -10  12  -3   65.29   10.10
  10 -12   3   58.79    9.40
  10 -12   3   33.80    7.60
  10 -12   3   44.70   10.50
 -11  12  -3  224.28   18.00
 -11  12  -3  215.08   15.60
  11 -12   3  212.88   16.80
  11 -12   3  215.88   18.30
 -12  12  -3   20.10    6.00
 -12  12  -3   15.70    7.00
  12 -12   3   19.80    8.50
  12 -12   3    6.90    6.10
 -13  12  -3    7.00    5.60
 -13  12  -3    4.10    6.10
  13 -12   3   14.20    5.70
 -14  12  -3   23.70   11.40
 -14  12  -3   23.50    6.20
 -14  12  -3   23.50    6.20
  14 -12   3   25.50    6.10
 -15  12  -3  127.89   18.40
 -15  12  -3   98.09   10.40
  15 -12   3   96.99   10.00
 -16  12  -3    9.50    8.80
 -16  12  -3   -1.00    4.30
  16 -12   3   -5.00    3.60
   5  11  -3   14.60    4.80
   5  11  -3   23.80    4.50
  -5 -11   3   19.70    4.50
   4  11  -3   17.50    4.50
   4  11  -3   16.30    5.70
  -4 -11   3   20.50    5.40
   3  11  -3   14.20    6.10
  -3 -11   3   17.10    5.80
   2  11  -3    7.30    6.60
  -2 -11   3    6.40    5.60
   1  11  -3  246.78   19.30
  -1 -11   3  215.38   17.50
   0  11  -3   59.59   10.30
   0 -11   3   57.29   10.50
   0 -11   3   72.29   10.30
   0 -11   3   47.90    8.50
  -1  11  -3  207.38   19.00
   1 -11   3  210.28   15.60
   1 -11   3  211.28   14.60
   1 -11   3  188.18   17.00
  -2  11  -3    0.40    8.20
  -2  11  -3    4.20    5.90
   2 -11   3    5.50    6.60
   2 -11   3   -3.90    5.30
   2 -11   3    0.90    4.70
  -3  11  -3   24.40    9.00
  -3  11  -3   27.40    7.20
   3 -11   3   31.10    8.30
   3 -11   3   20.30    5.70
   3 -11   3   36.20    6.30
  -4  11  -3   13.70    8.80
  -4  11  -3    2.00    6.70
   4 -11   3    3.70    4.30
   4 -11   3    0.10    4.60
   4 -11   3    1.50    7.20
  -5  11  -3   34.50    7.90
  -5  11  -3   23.40    9.50
   5 -11   3   31.90    8.20
   5 -11   3   28.00    5.60
   5 -11   3   44.20    6.50
  -6  11  -3   32.30    7.70
  -6  11  -3   51.49   10.40
   6 -11   3   31.40    5.90
   6 -11   3   32.70    5.70
   6 -11   3   20.40    7.70
  -7  11  -3  -10.80    8.40
  -7  11  -3   -3.70    6.30
   7 -11   3    3.70    4.80
   7 -11   3    4.20    7.40
   7 -11   3   -5.20    3.90
  -8  11  -3   24.60    8.80
  -8  11  -3   31.70    7.10
   8 -11   3    8.40    7.10
   8 -11   3   16.90    6.00
  -9  11  -3   -0.20    6.00
  -9  11  -3    4.10    7.40
   9 -11   3    8.20    6.70
   9 -11   3    0.20    6.00
 -10  11  -3  191.48   15.60
 -10  11  -3  200.48   18.10
  10 -11   3  178.08   16.50
  10 -11   3  223.28   17.20
 -11  11  -3   73.99   10.60
 -11  11  -3   59.09    8.40
  11 -11   3   53.59    9.20
  11 -11   3   42.10   10.20
  11 -11   3   42.30   11.70
 -12  11  -3  236.28   16.10
 -12  11  -3  239.88   18.30
  12 -11   3  204.28   27.90
  12 -11   3  229.68   17.70
  12 -11   3  179.18   20.70
 -13  11  -3    6.20    5.80
 -13  11  -3    7.80    6.20
  13 -11   3   11.00    6.20
 -14  11  -3   10.90    6.30
 -14  11  -3   10.70    6.10
 -14  11  -3   14.90   10.00
  14 -11   3   14.70    6.00
 -15  11  -3   19.90    9.40
 -15  11  -3   11.60    5.60
  15 -11   3   22.80    5.80
 -16  11  -3   15.80    8.00
 -16  11  -3   16.40    5.30
  16 -11   3   15.30    4.50
   6  10  -3    5.80    4.10
   6  10  -3    3.00    4.60
  -6 -10   3    1.10    4.30
   5  10  -3    9.40    5.30
  -5 -10   3   17.70    5.40
   4  10  -3    1.40    5.80
   4  10  -3   12.40    4.50
  -4 -10   3   16.80    5.70
   3  10  -3    6.00    6.50
   3  10  -3    5.00    4.70
  -3 -10   3   -2.10    5.50
   2  10  -3   34.80    8.40
   2  10  -3   34.30   13.40
  -2 -10   3   44.50    7.80
   1  10  -3  197.48   17.70
   1  10  -3  208.88   15.10
  -1 -10   3  202.38   16.70
  -1 -10   3  190.08   17.10
   0  10  -3   21.20    8.80
   0  10  -3   25.60    6.60
   0 -10   3   20.90    6.00
   0 -10   3   27.20    6.00
   0 -10   3   22.50    8.10
  -1  10  -3 1049.00   53.39
  -1  10  -3  949.60   50.49
   1 -10   3 1106.29   50.09
   1 -10   3 1021.40   52.49
   1 -10   3 1076.79   49.80
  -2  10  -3   21.40    9.00
   2 -10   3  -22.60   15.00
   2 -10   3   13.30    7.60
   2 -10   3   35.00    5.70
   2 -10   3   36.10    5.70
   2 -10   3   25.70   11.80
  -3  10  -3   53.99   10.40
  -3  10  -3   67.69    8.80
   3 -10   3   74.79    7.90
   3 -10   3   67.59   12.40
   3 -10   3   54.59    9.30
   3 -10   3   87.49    8.10
  -4  10  -3   31.50    7.80
  -4  10  -3   22.70    9.70
   4 -10   3   29.10   10.60
   4 -10   3   43.60    8.40
   4 -10   3   38.20    5.50
   4 -10   3   41.30    6.20
  -5  10  -3  452.45   28.80
  -5  10  -3  453.75   26.60
   5 -10   3  482.25   24.70
   5 -10   3  492.25   24.60
   5 -10   3  443.96   27.70
  -6  10  -3   41.90   10.10
  -6  10  -3   37.70    8.40
   6 -10   3   56.99    9.60
   6 -10   3   48.50    6.50
   6 -10   3   36.80    8.40
   6 -10   3   45.80    6.60
  -7  10  -3   59.89   10.60
  -7  10  -3   72.79    9.40
   7 -10   3   82.19   11.00
   7 -10   3   58.69    9.30
   7 -10   3   66.39    7.90
   7 -10   3   78.09    8.40
  -8  10  -3   20.40    8.40
  -8  10  -3   38.20    8.00
   8 -10   3   41.20    9.10
   8 -10   3   25.60    5.70
   8 -10   3   24.30    7.50
  -9  10  -3 1043.90   51.19
  -9  10  -3 1043.20   49.10
   9 -10   3  993.10   50.49
   9 -10   3  939.61   47.90
   9 -10   3  934.91   49.70
 -10  10  -3    6.70    7.10
 -10  10  -3   25.90    6.90
  10 -10   3   16.90    7.30
  10 -10   3    9.80   10.20
  10 -10   3   16.20    7.00
 -11  10  -3  230.88   18.70
 -11  10  -3  205.88   15.50
  11 -10   3  175.78   20.70
  11 -10   3  204.78   19.40
  11 -10   3  205.28   17.70
 -12  10  -3   43.80    8.50
 -12  10  -3   54.39    7.80
  12 -10   3   71.19   17.10
  12 -10   3   38.80    8.20
 -13  10  -3    4.00    6.40
 -13  10  -3    4.40    6.00
  13 -10   3    7.40    6.30
 -14  10  -3   11.80    9.40
 -14  10  -3    8.60    6.60
 -14  10  -3   -7.90    6.50
  14 -10   3   19.00    6.50
 -15  10  -3   25.70    8.90
 -15  10  -3   13.20    5.80
  15 -10   3    7.80    5.60
 -16  10  -3   11.70    7.30
 -16  10  -3    9.30    5.00
  16 -10   3    1.30    4.60
   7   9  -3   -2.40    4.20
   7   9  -3    1.80    4.30
  -7  -9   3    3.10    4.10
   6   9  -3   63.39    7.80
   6   9  -3   78.19   10.40
  -6  -9   3   55.49    9.20
   5   9  -3    2.40    5.70
   5   9  -3   -2.10    4.20
  -5  -9   3    6.00    5.40
   4   9  -3   15.10    7.10
   4   9  -3   29.20    5.70
  -4  -9   3   22.00    6.80
   3   9  -3  117.79   11.10
   3   9  -3   78.29   13.60
   3   9  -3  123.29   14.70
  -3  -9   3  115.49   13.60
   2   9  -3   -7.90    8.90
   2   9  -3   -4.60    7.00
   2   9  -3   -0.70    5.20
  -2  -9   3   -6.90    6.30
  -2  -9   3   -2.70    7.90
  -2  -9   3    9.90    7.10
   1   9  -3 1048.20   53.19
   1   9  -3 1062.09   54.19
   1   9  -3 1060.59   50.49
  -1  -9   3 1028.90   52.79
  -1  -9   3  995.50   49.10
  -1  -9   3 1038.80   49.40
   0   9  -3  708.83   39.60
   0   9  -3  767.72   39.30
   0   9  -3  717.03   36.70
   0  -9   3  702.93   38.40
   0  -9   3  713.73   35.20
  -1   9  -3  288.87   20.50
  -1   9  -3  235.38   17.70
   1  -9   3  262.17   15.30
   1  -9   3  287.87   19.80
  -2   9  -3  238.08   17.60
  -2   9  -3  271.67   20.30
   2  -9   3  241.58   17.20
   2  -9   3  259.97   14.70
   2  -9   3  235.98   19.20
   3  -9   3  450.35   22.60
   3  -9   3  409.46   24.00
   4  -9   3   29.90    6.40
   4  -9   3   38.40    5.20
   5  -9   3   36.10    5.20
   5  -9   3   34.90    7.00
   6  -9   3  431.46   23.10
   6  -9   3  474.95   22.80
   6  -9   3  403.36   23.90
  -7   9  -3  239.68   17.80
  -7   9  -3  244.08   19.80
   7  -9   3  274.07   15.70
   7  -9   3  273.07   15.20
   7  -9   3  255.77   16.80
   7  -9   3  262.47   19.90
  -8   9  -3  270.47   18.30
  -8   9  -3  262.87   20.30
   8  -9   3  276.67   15.80
   8  -9   3  258.67   20.30
   8  -9   3  276.97   17.70
  -9   9  -3  721.53   36.40
  -9   9  -3  702.33   38.30
   9  -9   3  689.63   36.80
   9  -9   3  716.63   35.40
   9  -9   3  718.33   38.50
 -10   9  -3  967.60   48.80
 -10   9  -3  951.90   50.59
  10  -9   3 1068.79   51.59
  10  -9   3  998.40   48.70
  10  -9   3  998.00   50.89
 -11   9  -3    6.60    7.40
 -11   9  -3    2.40    6.00
  11  -9   3   -1.60    9.10
  11  -9   3   14.20    8.00
 -12   9  -3  133.79   12.90
 -12   9  -3  124.19   15.00
  12  -9   3  134.49   15.10
  12  -9   3  128.49   20.20
 -13   9  -3   37.60    7.10
 -13   9  -3   27.00    9.90
 -13   9  -3   38.50    8.20
  13  -9   3   39.20    8.60
 -14   9  -3   24.30    9.90
 -14   9  -3    9.00    6.30
  14  -9   3    3.80    6.30
 -15   9  -3   52.59    7.80
 -15   9  -3   53.79   10.10
  15  -9   3   60.69    9.00
 -16   9  -3   -1.00    5.20
 -16   9  -3    8.60    6.70
  16  -9   3   -4.50    5.00
   8   8  -3    7.60    4.60
   8   8  -3    4.80    4.30
  -8  -8   3   12.40    4.60
   7   8  -3   68.99    9.80
   7   8  -3   69.99    7.90
  -7  -8   3   47.70    7.50
   6   8  -3   70.49    9.60
   6   8  -3   65.39    8.40
   6   8  -3   70.19   19.20
  -6  -8   3   73.69   10.80
   5   8  -3   28.20    7.90
   5   8  -3   30.80   18.20
   5   8  -3   21.40    5.60
  -5  -8   3   33.50    8.30
   4   8  -3   20.60    5.60
   4   8  -3   39.70   12.40
   4   8  -3   13.90    7.80
  -4  -8   3   16.50    6.90
   3   8  -3   11.50    5.80
   3   8  -3   29.90    8.60
   3   8  -3   33.60    9.60
  -3  -8   3    2.30    6.50
  -3  -8   3   20.10    7.70
   2   8  -3   41.30    9.30
   2   8  -3   31.90    8.00
   2   8  -3   16.40    6.10
  -2  -8   3   28.40    5.60
  -2  -8   3   33.20    8.90
  -2  -8   3   36.40    6.00
   1   8  -3  276.07   20.20
   1   8  -3  282.57   19.40
   1   8  -3  245.98   17.30
  -1  -8   3  275.17   15.50
  -1  -8   3  263.77   19.90
  -1  -8   3  260.17   19.20
   0   8  -3  204.38   15.10
   0  -8   3  182.18   17.60
   0  -8   3  186.88   12.10
   0  -8   3  207.28   15.20
  -1   8  -3  102.89   10.10
   1  -8   3   88.29    7.70
   1  -8   3   79.79   10.00
   2  -8   3  346.17   20.30
   2  -8   3  376.36   19.00
   3  -8   3   57.79    5.80
   3  -8   3   62.49    7.80
   4  -8   3   91.79    7.10
   4  -8   3   78.29    8.40
   5  -8   3   72.79    7.90
   5  -8   3   74.29    6.60
   6  -8   3  318.27   18.90
   6  -8   3  367.06   18.00
   6  -8   3  336.77   18.30
   7  -8   3  108.29    8.50
   7  -8   3  102.99    7.70
   7  -8   3   90.99    9.10
  -8   8  -3  189.58   18.70
  -8   8  -3  184.28   16.10
   8  -8   3  205.18   14.20
   8  -8   3  222.88   12.70
  -9   8  -3  279.57   17.90
  -9   8  -3  258.57   19.70
   9  -8   3  239.38   19.20
   9  -8   3  271.37   15.70
   9  -8   3  270.47   17.10
 -10   8  -3   26.00    6.90
 -10   8  -3   13.70    8.20
  10  -8   3   21.60    6.70
  10  -8   3   30.10    9.30
  10  -8   3   30.80    6.90
 -11   8  -3   24.10    6.80
 -11   8  -3   17.80    7.60
  11  -8   3   16.90   11.80
  11  -8   3   31.60    8.80
  11  -8   3   18.20    8.10
 -12   8  -3    9.00    7.20
 -12   8  -3   14.80    6.70
  12  -8   3   36.60   15.90
  12  -8   3   12.80    8.00
  12  -8   3    7.20   10.40
 -13   8  -3   51.29    7.90
 -13   8  -3   40.10   10.00
 -13   8  -3   45.40    8.80
  13  -8   3   36.70    8.80
 -14   8  -3   57.89   10.80
 -14   8  -3   51.39    8.60
  14  -8   3   80.49   11.00
 -15   8  -3   41.20    7.30
 -15   8  -3   63.29    9.90
  15  -8   3   40.00    7.60
 -16   8  -3   11.50    6.30
 -16   8  -3    5.40    5.50
  16  -8   3   10.90    5.80
   9   7  -3    6.50    4.20
  -9  -7   3   -0.20    4.10
   8   7  -3   41.50   15.20
   8   7  -3   50.39    7.60
   8   7  -3   55.29    8.00
  -8  -7   3   61.89    9.10
   7   7  -3   40.80    7.80
   7   7  -3   54.69   16.70
   7   7  -3   57.19    8.10
  -7  -7   3   41.90    7.70
   6   7  -3   98.69   18.70
   6   7  -3   80.29    9.50
   6   7  -3   75.49   14.00
   6   7  -3   95.19   12.50
  -6  -7   3   63.49    9.90
   5   7  -3   62.59    9.80
   5   7  -3   76.39    9.60
   5   7  -3   59.19   18.70
   5   7  -3   67.79    8.30
   5   7  -3   91.29   14.30
  -5  -7   3   77.89   11.10
   4   7  -3   10.80    7.40
   4   7  -3   -3.20    7.30
   4   7  -3    2.80    5.10
   4   7  -3   -8.00   18.70
   4   7  -3    6.20    4.20
  -4  -7   3    2.30    7.30
  -4  -7   3    5.30   12.30
   3   7  -3   61.19   10.20
   3   7  -3   81.59   10.90
   3   7  -3   73.39    9.80
   3   7  -3   61.19    7.60
  -3  -7   3   59.69   10.10
  -3  -7   3   70.69    8.40
  -3  -7   3   57.29    9.90
   2   7  -3  259.87   16.50
   2   7  -3  243.28   17.80
   2   7  -3  227.98   14.50
   2   7  -3  252.37   19.10
  -2  -7   3  261.07   15.20
  -2  -7   3  251.97   14.40
  -2  -7   3  265.07   20.00
  -2  -7   3  239.98   17.70
   1   7  -3   83.69    8.10
   1   7  -3  109.09   10.60
  -1  -7   3   88.29    7.90
  -1  -7   3   95.99    7.80
  -1  -7   3   99.29   10.60
   0   7  -3  552.84   29.60
   0  -7   3  564.44   28.90
   0  -7   3  543.75   27.10
   0  -7   3  571.44   27.20
  -1   7  -3   52.79    7.10
   1  -7   3   59.69    5.80
   1  -7   3   48.60    7.20
   2  -7   3  368.36   18.60
   2  -7   3  360.16   19.70
   3  -7   3 1254.47   57.69
   3  -7   3 1218.58   56.79
   4  -7   3 1243.98   58.49
   4  -7   3 1267.67   57.79
   5  -7   3  345.17   19.40
   5  -7   3  386.66   19.00
   6  -7   3   45.40    6.30
   6  -7   3   53.49    5.90
   7  -7   3  578.74   29.10
   7  -7   3  603.24   27.90
   7  -7   3  546.25   28.40
   8  -7   3   79.09    8.20
   8  -7   3   88.19    7.20
  -9   7  -3  232.68   17.00
  -9   7  -3  257.17   19.00
   9  -7   3  238.48   19.60
   9  -7   3  262.87   16.00
   9  -7   3  230.38   14.40
 -10   7  -3   56.99    9.30
 -10   7  -3   64.69    8.80
  10  -7   3   65.89   11.00
  10  -7   3   76.59   10.00
  10  -7   3   78.79    8.50
  10  -7   3   57.79    8.00
 -11   7  -3    0.70    6.50
 -11   7  -3   -3.90    7.50
  11  -7   3    3.40    7.00
  11  -7   3   -1.20    5.00
  11  -7   3   -1.40    7.90
  11  -7   3   -3.50   12.90
 -12   7  -3   70.29   10.30
 -12   7  -3   66.19   12.30
 -12   7  -3   88.69   11.70
  12  -7   3   75.39   11.30
  12  -7   3   17.40   18.40
  12  -7   3   61.59   11.70
 -13   7  -3   90.69   13.10
 -13   7  -3   83.29   12.70
  13  -7   3   88.99   22.60
  13  -7   3   84.29   11.90
 -14   7  -3   43.70    8.20
 -14   7  -3   53.99   10.30
  14  -7   3   80.79   11.10
 -15   7  -3   46.60    8.70
 -15   7  -3   49.60    7.50
  15  -7   3   35.80    7.90
 -16   7  -3    5.20    6.00
 -16   7  -3   -5.40    5.70
  16  -7   3    4.00    5.80
  10   6  -3    3.90    4.40
  10   6  -3  -12.50   12.50
 -10  -6   3    5.70    4.40
   9   6  -3   51.19   14.30
   9   6  -3   53.99    7.80
   9   6  -3   63.39    8.10
  -9  -6   3   70.89   10.00
   8   6  -3   68.19   15.20
   8   6  -3   55.99    8.00
   8   6  -3   81.29   11.70
  -8  -6   3   74.79   10.10
   7   6  -3  112.09   13.50
   7   6  -3   89.89   17.00
   7   6  -3   87.49    9.40
   7   6  -3   74.19    9.50
  -7  -6   3   84.19   13.00
   6   6  -3   20.40   16.10
   6   6  -3   38.60    6.70
   6   6  -3   38.60    8.50
   6   6  -3   24.10    9.80
   6   6  -3   32.60    5.50
  -6  -6   3   41.50    9.50
   5   6  -3   26.00   17.70
   5   6  -3   40.20    6.80
   5   6  -3   30.30    8.30
   5   6  -3   32.20    5.50
   5   6  -3   28.70    8.60
  -5  -6   3    1.40   11.00
  -5  -6   3   36.60    9.70
   4   6  -3   35.20    7.70
   4   6  -3   38.40    8.40
   4   6  -3   33.70    5.30
   4   6  -3   39.30    6.70
  -4  -6   3   27.10    7.10
  -4  -6   3   45.10   10.00
  -4  -6   3   39.60    9.80
   3   6  -3  395.76   21.20
   3   6  -3  445.46   24.50
  -3  -6   3  396.36   23.70
  -3  -6   3  413.16   21.50
  -3  -6   3  405.36   21.10
   2   6  -3  358.26   19.60
   2   6  -3  342.77   17.20
  -2  -6   3  314.47   16.90
  -2  -6   3  278.37   16.60
  -2  -6   3  310.77   18.90
   1   6  -3   48.60   10.40
   1   6  -3   48.30    6.40
   1   6  -3   56.59    7.30
  -1  -6   3   43.80    5.20
  -1  -6   3   42.00    6.90
  -1  -6   3   52.49    5.80
   0   6  -3    2.30    6.60
   0   6  -3   -2.00    3.00
   0  -6   3    0.70    3.20
   0  -6   3    1.70    2.30
   0  -6   3    5.00    2.90
  -1   6  -3   24.30    4.40
   1  -6   3   24.90    4.20
   1  -6   3   27.00    3.80
   2  -6   3  422.56   20.50
   2  -6   3  411.76   21.20
   3  -6   3 9950.50  438.46
   3  -6   3 9830.52  437.66
   4  -6   3  387.36   19.40
   4  -6   3  395.06   20.10
   5  -6   3   17.90    3.40
   5  -6   3   26.40    4.30
   6  -6   3   -1.80    2.60
   6  -6   3   -0.40    2.90
   7  -6   3   49.99    4.80
   7  -6   3   55.09    6.30
   8  -6   3  370.36   19.60
   8  -6   3  338.67   17.90
   9  -6   3  386.96   20.90
   9  -6   3  439.96   22.90
 -10   6  -3   53.39    8.00
 -10   6  -3   32.30    8.60
  10  -6   3   39.20    7.40
  10  -6   3   40.00    5.40
  10  -6   3   45.40   10.30
  10  -6   3   28.40   10.10
 -11   6  -3   23.10    8.30
 -11   6  -3   27.60    7.60
  11  -6   3   32.70    8.50
  11  -6   3    2.60   14.30
  11  -6   3   41.60    5.50
  11  -6   3   37.70    9.50
 -12   6  -3   23.60    8.90
 -12   6  -3   41.70    8.20
 -12   6  -3   38.60    9.00
  12  -6   3   24.30    9.30
  12  -6   3   38.70   10.50
  12  -6   3   37.00    5.60
  13  -6   3   25.50   14.80
  13  -6   3    2.90   10.70
 -14   6  -3   53.69    9.40
 -14   6  -3   60.09    8.90
  14  -6   3   63.39   10.10
 -15   6  -3   69.69   11.10
 -15   6  -3   65.29    8.40
  15  -6   3   62.89    9.80
 -16   6  -3   -0.50    6.30
 -16   6  -3   12.90    5.60
 -16   6  -3  -16.20    9.40
  16  -6   3    2.80    5.60
  11   5  -3   33.70   11.60
  11   5  -3   11.70    4.40
 -11  -5   3   14.80    4.60
  10   5  -3   11.10   12.00
  10   5  -3   18.10    5.40
  10   5  -3   11.00    5.20
 -10  -5   3   14.30    5.40
   9   5  -3   14.00   13.20
   9   5  -3    9.70    5.80
   9   5  -3   16.80    4.70
  -9  -5   3    8.60    6.20
   8   5  -3   23.30    6.10
   8   5  -3   45.20    6.10
   8   5  -3   51.09    8.80
   8   5  -3   63.99   14.80
   8   5  -3   26.10   22.00
  -8  -5   3   27.60    7.70
   7   5  -3   49.10   11.20
   7   5  -3   86.79   12.10
   7   5  -3   69.99    8.80
   7   5  -3   60.79    8.90
   7   5  -3   58.89   16.10
  -7  -5   3   87.19   13.50
  -7  -5   3   71.89   10.50
   6   5  -3   34.60    8.00
   6   5  -3   30.60    5.10
   6   5  -3   33.90    6.30
   6   5  -3   31.50   15.50
   6   5  -3   30.20    9.00
  -6  -5   3   33.40    9.20
  -6  -5   3   42.50   10.60
  -6  -5   3   41.90   10.80
   5   5  -3  420.56   25.30
   5   5  -3  416.56   21.60
   5   5  -3  425.56   22.70
   5   5  -3  420.96   25.30
  -5  -5   3  427.26   25.80
  -5  -5   3  443.76   27.00
  -5  -5   3  384.36   25.10
  -5  -5   3  366.36   22.90
   4   5  -3   37.10    6.80
   4   5  -3   35.40    5.10
  -4  -5   3   36.10    5.80
  -4  -5   3   31.10    5.40
  -4  -5   3   40.20    7.40
   3   5  -3   67.19    8.00
   3   5  -3   48.40   10.00
   3   5  -3   56.59    6.80
  -3  -5   3   75.09    7.00
  -3  -5   3   72.09    6.80
  -3  -5   3   81.19    8.80
   2   5  -3  317.37   21.30
   2   5  -3  359.26   19.60
   2   5  -3  348.57   18.00
  -2  -5   3  360.06   19.20
  -2  -5   3  364.96   17.90
  -2  -5   3  331.37   17.50
   1   5  -3   23.00    4.20
   1   5  -3   10.10    5.80
  -1  -5   3   21.70    3.60
  -1  -5   3   20.10    3.00
  -1  -5   3   22.90    4.20
   0   5  -3  348.17   18.40
   0   5  -3  332.97   18.90
   0  -5   3  337.97   17.00
   0  -5   3  357.96   18.00
   0  -5   3  335.07   16.70
  -1   5  -3   45.50    5.00
  -1   5  -3   36.20    5.40
   1  -5   3   35.10    4.60
   1  -5   3   43.30    4.50
   2  -5   3  155.78    9.40
   2  -5   3  159.98    8.90
   3  -5   3  169.78    9.50
   3  -5   3  170.48    9.90
   4  -5   3   46.90    4.40
   4  -5   3   44.10    4.60
   5  -5   3  380.26   18.10
   5  -5   3  340.37   18.20
   6  -5   3   22.40    3.60
   6  -5   3   22.30    3.00
   6  -5   3   26.80    4.00
   7  -5   3  352.56   17.30
   7  -5   3  353.46   18.70
   8  -5   3   55.09    6.40
   8  -5   3   45.40    5.30
   9  -5   3   24.20    4.90
   9  -5   3   34.50    5.70
   9  -5   3   37.50    8.70
 -10   5  -3  426.96   24.70
 -10   5  -3  441.76   26.60
  10  -5   3  428.76   28.70
  10  -5   3  426.96   22.00
  10  -5   3  439.76   28.30
  10  -5   3  452.35   24.70
 -11   5  -3   44.10    9.10
 -11   5  -3   38.60    8.00
 -11   5  -3   17.60    8.90
  11  -5   3   33.70    8.10
  11  -5   3   -8.90   15.40
  11  -5   3   39.20   11.60
  11  -5   3   30.60    5.20
 -12   5  -3   53.99   10.30
 -12   5  -3   50.89    9.30
  12  -5   3   82.29   12.80
  12  -5   3   71.59   12.40
  12  -5   3   67.39    8.40
 -13   5  -3   42.40    9.20
 -13   5  -3   21.60    8.00
  13  -5   3   39.10    5.80
  13  -5   3   31.10   10.10
 -14   5  -3   12.50    7.20
 -14   5  -3   13.50    6.70
  14  -5   3   13.90    8.70
 -15   5  -3   10.50    6.20
 -15   5  -3   16.00    6.80
 -15   5  -3   17.90    7.00
  15  -5   3    5.80    7.40
 -16   5  -3   23.20    7.10
 -16   5  -3   21.30    5.60
  16  -5   3   11.60    5.90
  16  -5   3   17.00    4.70
  12   4  -3   -0.90    4.10
  12   4  -3   17.00    9.30
 -12  -4   3    7.30    4.40
  11   4  -3   23.80   10.60
  11   4  -3    9.40    5.00
 -11  -4   3   12.70    5.20
  10   4  -3   13.10    4.90
  10   4  -3   12.90    5.60
  10   4  -3   20.50   11.40
 -10  -4   3   13.60    6.40
   9   4  -3   31.50    7.30
   9   4  -3   28.60   13.00
   9   4  -3   33.60    6.70
   9   4  -3   27.70    5.50
  -9  -4   3   18.70    7.60
  -9  -4   3   36.60    8.90
   8   4  -3   21.10    5.50
   8   4  -3   10.30    9.50
   8   4  -3   26.60    7.20
   8   4  -3   38.30   13.30
   8   4  -3   15.90    5.20
  -8  -4   3   12.80    8.10
  -8  -4   3  -22.70   16.80
  -8  -4   3   15.20    8.10
   7   4  -3   -4.30    5.80
   7   4  -3   -3.00    7.60
   7   4  -3   13.10    4.50
   7   4  -3   -0.50    4.60
   7   4  -3  -15.30   13.30
  -7  -4   3   -8.20    7.70
  -7  -4   3   -1.90   10.50
  -7  -4   3    0.00    7.50
   6   4  -3   22.10   16.90
   6   4  -3   45.80    5.80
   6   4  -3   44.60    8.10
   6   4  -3   41.70    7.70
   6   4  -3   41.60    6.00
  -6  -4   3   45.90    9.80
  -6  -4   3   44.50    8.70
  -6  -4   3   26.00    7.30
  -6  -4   3   33.40    8.50
   5   4  -3   41.70    6.70
   5   4  -3   38.90    5.20
   5   4  -3   20.10   11.40
  -5  -4   3   27.40    5.60
  -5  -4   3   34.70    6.90
  -5  -4   3   45.50    6.30
   4   4  -3   88.29   12.70
   4   4  -3   86.09    7.50
   4   4  -3   87.29    8.50
  -4  -4   3   79.89    8.70
  -4  -4   3   76.09    7.80
  -4  -4   3   84.49    7.20
   3   4  -3 1212.08   54.29
   3   4  -3 1071.69   54.89
  -3  -4   3 1147.89   52.49
  -3  -4   3 1114.89   52.39
  -3  -4   3 1166.68   53.99
   2   4  -3  391.66   20.50
   2   4  -3  410.76   20.00
  -2  -4   3  350.06   18.00
  -2  -4   3  368.16   19.40
  -2  -4   3  342.07   18.40
   1   4  -3   47.20    6.10
   1   4  -3   45.50    5.00
  -1  -4   3   39.40    4.60
  -1  -4   3   39.30    3.60
   0   4  -3   12.70    3.60
   0   4  -3   11.20    2.80
   0  -4   3   12.80    2.70
   0  -4   3   12.40    1.90
  -1   4  -3  523.85   25.30
  -1   4  -3  552.24   25.20
   1  -4   3  481.55   24.70
   2  -4   3  413.46   20.10
   3  -4   3  560.84   26.50
   4  -4   3    9.50    2.20
   5  -4   3   40.10    4.10
   6  -4   3  408.16   20.60
   6  -4   3  413.66   19.40
   7  -4   3 1139.79   51.79
   7  -4   3 1082.09   50.29
   8  -4   3   89.89    7.50
   8  -4   3   84.69    6.30
   8  -4   3   71.99    9.60
   9  -4   3   43.40    7.00
   9  -4   3   43.20    9.10
 -10   4  -3   31.00    8.90
 -10   4  -3   23.10    8.80
 -10   4  -3   46.70    8.40
  10  -4   3   51.49    8.70
  10  -4   3   52.49   11.70
  10  -4   3   36.80    5.10
  10  -4   3   17.70   11.60
 -11   4  -3    9.90    8.10
 -11   4  -3   -3.00    8.20
 -11   4  -3    2.20    8.30
  11  -4   3    4.90    4.20
  11  -4   3   10.50   10.90
  11  -4   3    6.80    6.60
 -12   4  -3   15.10    8.10
 -12   4  -3   28.00    8.30
 -12   4  -3   27.10   10.00
  12  -4   3    5.00    9.80
  12  -4   3   11.80    4.60
  12  -4   3   24.70    5.60
  12  -4   3   20.80    9.70
 -13   4  -3   25.80    8.00
 -13   4  -3   29.00    8.20
  13  -4   3   24.20    5.30
  13  -4   3   37.90   10.50
 -14   4  -3   21.80    7.40
 -14   4  -3    4.50    6.60
  14  -4   3    7.10    8.50
 -15   4  -3   25.90    6.30
 -15   4  -3    4.30   10.60
 -15   4  -3   15.70    7.20
  15  -4   3   12.90    7.70
 -16   4  -3    3.50    4.50
  16  -4   3    1.30    4.00
  16  -4   3    3.20    6.00
  12   3  -3   92.89   10.00
  12   3  -3   98.09   15.90
 -12  -3   3  107.39   10.20
  11   3  -3   18.70    5.80
  11   3  -3   20.50   10.00
 -11  -3   3   22.30    6.90
  10   3  -3   13.60    6.30
  10   3  -3    1.10   10.60
  10   3  -3   10.50    5.00
 -10  -3   3   16.30    7.20
 -10  -3   3   10.10    8.00
   9   3  -3  130.99   13.20
   9   3  -3  113.49   16.00
   9   3  -3  121.29   11.50
   9   3  -3  124.49   17.90
   9   3  -3  121.69   10.70
  -9  -3   3  114.59   14.60
  -9  -3   3   72.79   16.90
   8   3  -3   25.10   12.80
   8   3  -3   19.30    4.90
   8   3  -3   20.60    8.80
   8   3  -3   28.30    5.70
   8   3  -3   20.10    6.80
  -8  -3   3   29.50    8.40
  -8  -3   3   13.50    9.90
  -8  -3   3   46.00    9.60
   7   3  -3   67.89   15.80
   7   3  -3   66.39    9.00
   7   3  -3   69.99    9.60
   7   3  -3   64.99   10.20
   7   3  -3   74.99    7.80
  -7  -3   3   72.09    9.40
  -7  -3   3   51.09    9.30
  -7  -3   3   62.39   10.60
  -7  -3   3   83.29   12.90
   6   3  -3  405.36   23.40
   6   3  -3  361.56   27.90
   6   3  -3  416.36   21.00
  -6  -3   3  390.56   23.60
  -6  -3   3  433.86   22.50
  -6  -3   3  421.96   21.90
   5   3  -3   62.39    6.50
   5   3  -3   61.99    7.30
   5   3  -3   60.69    9.40
  -5  -3   3   64.29    7.70
  -5  -3   3   48.00    6.60
  -5  -3   3   59.89    8.00
   4   3  -3 1134.99   53.79
   4   3  -3 1104.59   54.79
  -4  -3   3 1152.58   52.39
  -4  -3   3 1131.59   52.29
  -4  -3   3 1163.08   53.89
   3   3  -3 9498.95  418.76
   3   3  -3 9187.38  419.06
  -3  -3   3 9749.92  418.76
  -3  -3   3 9302.37  417.46
   2   3  -3  167.48    9.90
   2   3  -3  162.18   10.50
  -2  -3   3  161.68    8.70
  -2  -3   3  170.98    9.90
   1   3  -3  487.05   24.20
   1   3  -3  448.46   24.30
  -1  -3   3  525.95   24.20
  -1  -3   3  540.15   23.20
   0   3  -3    4.90    2.40
   0   3  -3    0.30    1.80
   0  -3   3    1.80    1.00
   0  -3   3    2.80    1.80
  -1   3  -3 1585.54   68.49
  -1   3  -3 1392.36   68.19
   1  -3   3 1559.24   68.09
   2  -3   3 1515.45   68.19
   3  -3   3    2.50    1.60
   4  -3   3  487.55   23.20
   5  -3   3  163.38    8.10
   5  -3   3  161.58    9.20
   6  -3   3 8773.92  394.56
   6  -3   3 9094.59  395.96
   7  -3   3 1166.28   51.79
   7  -3   3 1078.79   52.69
   7  -3   3 1079.09   49.70
   8  -3   3   66.59   10.30
   8  -3   3   66.89    6.90
   9  -3   3  395.76   25.50
   9  -3   3  409.86   22.50
 -10   3  -3   87.09   11.80
 -10   3  -3   67.09    9.80
 -10   3  -3   72.29   10.60
  10  -3   3   73.39   13.90
  10  -3   3   56.89    9.70
  10  -3   3   66.19    7.80
 -11   3  -3   39.80    9.20
 -11   3  -3    8.50    8.20
 -11   3  -3   22.20    8.30
  11  -3   3   20.60    7.70
  11  -3   3   14.20   11.10
  11  -3   3   26.30    5.00
 -12   3  -3   98.19   14.10
 -12   3  -3   89.49   14.50
 -12   3  -3   80.99   13.10
  12  -3   3  135.99    9.90
  12  -3   3  102.29   17.10
  12  -3   3  131.89   10.70
  12  -3   3  135.49   19.70
 -13   3  -3    6.60    6.80
 -13   3  -3    8.20    7.40
  13  -3   3   14.00    4.60
  13  -3   3   10.20    9.90
 -14   3  -3    7.30    7.50
 -14   3  -3   15.30    7.90
 -14   3  -3   14.10    6.60
  14  -3   3   16.60    9.30
 -15   3  -3  106.99   10.30
 -15   3  -3   81.89   10.30
  15  -3   3   98.29   13.90
  13   2  -3   12.40    4.70
  13   2  -3    2.80    7.20
 -13  -2   3   15.50    5.10
  12   2  -3   37.00    6.20
  12   2  -3   27.10    9.20
 -12  -2   3   19.00    6.30
  11   2  -3   -0.40    5.30
  11   2  -3    8.20    5.50
  11   2  -3  -17.40    9.00
 -11  -2   3    6.00    7.10
 -11  -2   3   11.70    7.20
  10   2  -3   44.40   12.00
  10   2  -3   39.00    7.50
  10   2  -3   42.60    7.40
  10   2  -3   44.30    6.30
  10   2  -3   55.89   14.30
 -10  -2   3   32.50    8.40
 -10  -2   3   33.90    8.30
 -10  -2   3   24.30   16.90
   9   2  -3    4.40    9.40
   9   2  -3    1.80    5.80
   9   2  -3   -0.20   11.40
   9   2  -3    5.30    5.00
   9   2  -3    1.40    4.80
  -9  -2   3   -5.90    7.00
  -9  -2   3    2.50   11.70
  -9  -2   3    4.80    7.90
   8   2  -3   26.20   12.60
   8   2  -3   24.10    7.60
   8   2  -3   24.50    5.80
   8   2  -3   25.30    5.00
  -8  -2   3   32.40    8.00
  -8  -2   3   36.10   10.10
  -8  -2   3   29.10    7.80
  -8  -2   3   34.20    8.20
  -8  -2   3   34.70    9.10
   7   2  -3  246.78   16.70
   7   2  -3  244.68   13.90
   7   2  -3  237.78   14.90
  -7  -2   3  245.78   19.50
  -7  -2   3  227.28   15.50
  -7  -2   3  250.07   17.50
  -7  -2   3  246.18   18.60
   6   2  -3  310.77   18.20
   6   2  -3  289.57   20.20
   6   2  -3  294.47   16.30
  -6  -2   3  325.17   18.70
  -6  -2   3  319.77   17.30
   5   2  -3  350.56   18.10
   5   2  -3  344.97   18.80
   5   2  -3  329.47   20.10
  -5  -2   3  366.06   19.40
  -5  -2   3  332.97   17.80
   4   2  -3  352.56   19.40
   4   2  -3  331.97   20.00
  -4  -2   3  405.76   18.70
  -4  -2   3  406.36   20.00
   3   2  -3  165.08   10.20
   3   2  -3  164.78    9.60
  -3  -2   3  159.88    8.60
  -3  -2   3  150.38    9.60
   2   2  -3  412.46   19.60
   2   2  -3  389.06   19.20
  -2  -2   3  384.86   18.20
  -2  -2   3  375.46   19.10
   1   2  -3 1569.34   67.39
   1   2  -3 1529.15   67.19
  -1  -2   3 1490.65   66.19
  -1  -2   3 1368.16   66.99
   0   2  -3  829.32   38.60
   0   2  -3  873.11   38.70
   0  -2   3  854.41   37.70
   0  -2   3  828.72   38.50
   1  -2   3  205.68   10.20
   2  -2   3  901.31   40.80
   3  -2   3 1541.85   69.19
   4  -2   3  391.06   18.80
   5  -2   3  169.88    9.10
   5  -2   3  154.28    7.70
   6  -2   3  328.77   15.20
   6  -2   3  324.17   18.50
   6  -2   3  353.06   17.30
   7  -2   3  347.27   18.20
   7  -2   3  338.07   19.80
   8  -2   3  305.47   20.00
   8  -2   3  302.97   17.30
  -9   2  -3  222.58   19.20
  -9   2  -3  191.58   25.10
   9  -2   3  257.77   15.40
   9  -2   3  167.78   27.90
   9  -2   3  238.38   13.60
 -10   2  -3   31.40    7.30
 -10   2  -3   35.20    8.80
 -10   2  -3   34.70    9.40
  10  -2   3   28.00    6.80
  10  -2   3    4.90   11.70
  10  -2   3   29.50    5.00
 -11   2  -3   -4.60    6.80
 -11   2  -3   -0.90    8.90
 -11   2  -3   -3.80    7.80
  11  -2   3    2.00    4.00
  11  -2   3   -2.50   11.80
  11  -2   3   -7.80    7.10
  11  -2   3    4.90    4.20
 -12   2  -3   52.49   12.60
 -12   2  -3   52.59    9.60
 -12   2  -3   57.59    9.20
  12  -2   3   44.70    6.30
  12  -2   3   50.79    7.40
  12  -2   3   40.70   12.20
  12  -2   3   22.70   10.60
 -13   2  -3   13.10    6.80
 -13   2  -3    5.30    8.10
 -13   2  -3    5.20    8.10
  13  -2   3   10.40   10.60
  13  -2   3    7.80    4.20
  13  -2   3    4.00    9.90
 -14   2  -3   35.50    7.00
 -14   2  -3   20.00    8.60
  14  -2   3   24.50    9.60
 -15   2  -3   10.80    4.50
  15  -2   3    5.40    4.10
  15  -2   3   -2.40    8.30
  14   1  -3   27.50    5.40
  14   1  -3   30.70    7.30
 -14  -1   3   20.80    5.10
  13   1  -3   68.09    9.00
  13   1  -3   79.19   10.50
 -13  -1   3   76.79   10.70
  12   1  -3    9.90    8.60
  12   1  -3    5.50    5.40
 -12  -1   3   16.20    7.00
 -12  -1   3    9.80    6.60
  11   1  -3  222.48   14.80
  11   1  -3  206.48   21.70
  11   1  -3  229.68   16.60
 -11  -1   3  230.38   18.50
  10   1  -3  198.78   20.40
  10   1  -3  210.78   13.90
  10   1  -3  225.28   22.00
  10   1  -3  199.38   14.70
 -10  -1   3  202.28   17.30
 -10  -1   3  195.58   18.60
 -10  -1   3  183.38   22.00
   9   1  -3  891.61   51.59
   9   1  -3  939.91   45.50
   9   1  -3  925.91   45.80
   9   1  -3  936.01   49.40
  -9  -1   3  992.80   50.49
  -9  -1   3 1035.90   46.00
  -9  -1   3  998.60   49.00
  -9  -1   3  968.40   50.19
  -9  -1   3  964.80   48.70
   8   1  -3  242.68   14.90
   8   1  -3  263.27   24.10
   8   1  -3  252.77   14.40
   8   1  -3  244.58   17.20
   8   1  -3  246.58   23.30
  -8  -1   3  237.58   17.90
  -8  -1   3  230.68   16.20
  -8  -1   3  271.97   20.90
  -8  -1   3  222.48   18.30
  -8  -1   3  244.78   16.40
   7   1  -3   77.79    9.10
   7   1  -3   79.49   12.30
   7   1  -3  106.39    7.80
  -7  -1   3   86.49    9.70
  -7  -1   3   83.49    8.60
   6   1  -3   55.49    8.60
   6   1  -3   53.49    6.50
   6   1  -3   53.59    6.00
  -6  -1   3   43.60    6.00
   5   1  -3   16.90    4.70
   5   1  -3   21.70    3.90
  -5  -1   3   26.70    4.00
   4   1  -3   29.30    4.60
   4   1  -3   35.60    4.30
  -4  -1   3   40.70    3.80
   3   1  -3  521.45   25.00
   3   1  -3  527.85   25.30
   2   1  -3 1482.95   66.89
   2   1  -3 1488.45   67.09
   1   1  -3  229.78   11.00
   1   1  -3  220.88   10.90
  -1  -1   3  216.48   10.80
  -1  -1   3  217.58   10.10
   0   1  -3 1268.77   55.69
   0   1  -3 1229.48   56.29
   0   1  -3 1282.77   56.39
   1  -1   3 1274.67   56.89
   2  -1   3  235.08   11.20
   3  -1   3 1471.15   65.89
   4  -1   3  522.95   24.10
   4  -1   3  504.15   22.80
   5  -1   3   37.80    3.80
   5  -1   3   32.60    5.30
   6  -1   3   16.20    3.00
   6  -1   3   13.90    5.30
   7  -1   3   49.99    8.40
   7  -1   3   50.39    5.80
  -8   1  -3  107.19    9.60
   8  -1   3   86.09    8.40
   8  -1   3   88.69   14.80
  -9   1  -3  267.27   19.90
  -9   1  -3  252.77   19.40
  -9   1  -3  258.47   17.70
   9  -1   3  273.57   17.20
   9  -1   3  253.27   15.00
 -10   1  -3 1031.00   50.59
 -10   1  -3 1029.80   49.90
 -10   1  -3  992.00   50.29
  10  -1   3  911.01   49.60
  10  -1   3  975.20   46.50
  10  -1   3  978.30   54.49
 -11   1  -3  189.88   18.20
 -11   1  -3  180.78   18.50
 -11   1  -3  188.38   17.40
  11  -1   3  200.98   18.20
  11  -1   3  202.98   12.80
  11  -1   3  187.58   24.80
  11  -1   3  206.78   12.60
 -12   1  -3  195.38   17.20
 -12   1  -3  181.48   18.50
 -12   1  -3  216.48   19.70
  12  -1   3  221.58   14.10
  12  -1   3  239.18   25.00
  12  -1   3  222.08   13.50
 -13   1  -3   -3.80    8.40
 -13   1  -3   15.80    6.20
  13  -1   3    0.70   11.40
 -14   1  -3   74.59    9.50
  14  -1   3   82.89    8.80
  14  -1   3   78.49   13.00
 -15   1  -3   34.40    5.30
  15  -1   3   37.60    5.30
  14   0  -3    1.10    4.90
  14   0  -3    6.10    6.60
 -14   0   3    7.00    5.20
  13   0  -3   14.70    5.50
  13   0  -3   16.60    7.70
 -13   0   3    9.30    6.40
 -13   0   3    9.50    6.20
  12   0  -3    9.20    8.80
  12   0  -3   14.90    6.00
 -12   0   3   14.10    7.50
 -12   0   3   12.20    6.50
  11   0  -3   36.30   10.50
  11   0  -3   40.00   12.30
  11   0  -3   63.59    9.60
 -11   0   3   61.09    9.00
 -11   0   3   57.19   10.40
 -11   0   3   28.70   14.70
  10   0  -3   22.70    5.70
  10   0  -3   24.90    9.10
  10   0  -3   10.40   10.30
  10   0  -3   25.00    6.30
 -10   0   3   22.10    7.80
 -10   0   3   27.80    9.70
 -10   0   3   16.30    9.90
 -10   0   3   18.80    6.80
 -10   0   3   17.50    9.70
   9   0  -3  654.33   39.10
   9   0  -3  679.13   39.80
   9   0  -3  666.23   32.90
   9   0  -3  679.33   33.20
   9   0  -3  677.63   36.30
  -9   0   3  690.33   38.40
  -9   0   3  663.53   37.00
  -9   0   3  687.33   35.40
  -9   0   3  701.73   36.50
  -9   0   3  682.03   34.00
   8   0  -3  202.88   14.00
   8   0  -3  146.69   16.00
   8   0  -3  173.88   11.60
  -8   0   3  195.58   13.30
  -8   0   3  216.28   21.80
   7   0  -3  458.95   27.20
   7   0  -3  495.05   25.80
   7   0  -3  490.75   24.10
  -7   0   3  524.15   25.40
   6   0  -3    3.20    2.80
   6   0  -3    2.30    4.00
   5   0  -3  328.67   17.40
   5   0  -3  344.77   18.10
   4   0  -3    9.50    2.80
   4   0  -3    7.90    2.20
   3   0  -3    1.10    1.20
   3   0  -3    1.00    1.80
   3   0  -3    3.00    1.60
   2   0  -3  887.11   37.80
   2   0  -3  822.12   38.10
   2   0  -3  807.62   38.00
   1   0  -3 1307.07   55.79
   1   0  -3 1235.68   55.79
   1   0  -3 1211.58   55.69
   0   0  -3    1.60    0.70
   0   0  -3    0.00    0.40
   0   0  -3   -0.50    0.40
   0   0   3    1.10    0.50
   0   0   3    0.60    0.40
  -1   0  -3 1302.47   56.19
  -1   0  -3 1273.57   56.49
   1   0   3 1223.18   56.19
   2   0   3  833.62   37.50
   3   0   3    2.10    1.20
   3   0   3    5.00    2.40
   4   0   3   11.70    3.70
   4   0   3   13.10    2.20
   5   0   3  330.27   18.50
   5   0   3  351.26   17.30
  -6   0  -3   -0.20    2.60
   6   0   3    0.00    2.40
   6   0   3   -1.40    6.00
  -7   0  -3  549.95   28.50
   7   0   3  560.24   28.30
  -8   0  -3  196.38   13.70
  -8   0  -3  195.08   20.40
   8   0   3  173.38   12.40
   8   0   3  195.68   13.40
  -9   0  -3  705.43   37.10
  -9   0  -3  705.93   37.50
  -9   0  -3  701.93   36.80
   9   0   3  582.94   43.60
   9   0   3  706.03   33.60
   9   0   3  700.83   36.50
 -10   0  -3   35.30   10.90
 -10   0  -3   -7.80   12.70
 -10   0  -3   35.60    9.60
 -10   0  -3   20.10    9.70
 -10   0  -3   31.80    8.60
  10   0   3   31.40   15.70
  10   0   3   21.30    4.50
  10   0   3    8.00    7.50
  10   0   3   19.80    4.70
 -11   0  -3   51.99    8.60
 -11   0  -3   38.00   10.00
 -11   0  -3   39.30   12.40
 -11   0  -3   46.90   10.60
  11   0   3   37.70    5.50
  11   0   3   46.10   15.00
  11   0   3   39.00   11.80
 -12   0  -3   12.10    9.00
 -12   0  -3   21.00    6.90
  12   0   3   19.70   12.70
  12   0   3   14.00    4.20
  12   0   3    7.30    5.40
 -13   0  -3    9.90    5.30
  13   0   3    2.70    4.50
  13   0   3    9.70    4.20
  13   0   3  -15.30   11.70
 -14   0  -3   -1.80    4.20
  14   0   3   -3.90    3.80
  14   0   3    1.10   11.00
  15  -1  -3   26.90    6.20
  15  -1  -3   27.20    5.90
 -15   1   3   27.70    5.70
  14  -1  -3   54.79    8.60
  14  -1  -3   92.49    9.60
 -14   1   3   85.09   10.70
 -14   1   3   79.69   10.40
  13  -1  -3   11.90    5.40
  13  -1  -3    8.40    8.20
 -13   1   3   14.70    6.30
 -13   1   3   16.60    7.00
  12  -1  -3  215.28   20.30
 -12   1   3  226.68   18.80
 -12   1   3  221.18   16.90
  11  -1  -3  189.88   13.80
  11  -1  -3  203.78   19.60
  11  -1  -3  187.38   20.40
 -11   1   3  188.58   14.50
 -11   1   3  145.19   21.00
 -11   1   3  181.38   21.00
 -11   1   3  214.18   17.00
 -11   1   3  232.28   19.50
  10  -1  -3  969.40   44.50
  10  -1  -3  832.22   52.19
  10  -1  -3  969.00   49.90
  10  -1  -3  977.30   44.60
  10  -1  -3  982.20   48.70
 -10   1   3  958.80   47.80
 -10   1   3  884.11   49.20
 -10   1   3  883.51   47.10
 -10   1   3  927.91   45.20
   9  -1  -3  249.38   16.80
   9  -1  -3  229.98   20.10
   9  -1  -3  247.98   14.60
   9  -1  -3  231.68   22.00
   9  -1  -3  246.58   15.00
  -9   1   3  241.98   21.70
  -9   1   3  254.07   18.60
  -9   1   3  251.27   16.70
  -9   1   3  260.37   16.80
   8  -1  -3   86.29    8.60
   8  -1  -3   83.59    7.80
   8  -1  -3   69.09   10.40
   7  -1  -3   53.49    7.60
   7  -1  -3   46.00    5.80
   6  -1  -3   16.60    4.10
   6  -1  -3   20.90    3.70
   5  -1  -3   34.10    4.00
   5  -1  -3   37.00    4.50
   5  -1  -3   39.90    3.50
   4  -1  -3  471.15   21.70
   4  -1  -3  473.15   22.40
   4  -1  -3  453.95   22.10
   3  -1  -3 1528.35   67.19
   3  -1  -3 1481.35   67.49
   3  -1  -3 1499.15   67.39
   2  -1  -3  215.88   10.40
   2  -1  -3  218.28   10.40
   2  -1  -3  223.08   10.50
   1  -1  -3 1224.78   54.79
   1  -1  -3 1279.77   54.79
  -1   1   3 1183.18   54.39
   0  -1  -3 1240.78   54.59
   0  -1  -3 1212.58   54.39
   0  -1  -3 1207.88   53.99
   0   1   3 1194.58   53.99
   0   1   3 1257.47   53.99
  -1  -1  -3  223.58   10.60
  -1  -1  -3  215.98    9.90
  -1  -1  -3  209.28   10.10
  -1  -1  -3  215.38   10.20
   1   1   3  213.88   10.00
  -2  -1  -3 1401.96   64.29
  -2  -1  -3 1447.86   65.39
   2   1   3 1511.95   64.99
  -3  -1  -3  543.25   24.30
   3   1   3  472.05   23.70
  -4  -1  -3   40.10    4.20
   4   1   3   34.20    5.90
   4   1   3   37.30    3.90
  -5  -1  -3   22.50    3.90
   5   1   3   15.40    6.90
   5   1   3   22.10    3.60
  -6  -1  -3   43.10    6.00
   6   1   3   58.39    6.10
   6   1   3   27.00    9.20
  -7  -1  -3   96.19    8.90
   7   1   3   90.79    8.70
  -8  -1  -3  217.08   29.20
  -8  -1  -3  224.58   18.60
  -8  -1  -3  254.07   18.90
  -8  -1  -3  226.58   22.80
  -8  -1  -3  259.77   17.10
   8   1   3  269.87   14.90
   8   1   3  256.67   17.00
  -9  -1  -3  901.11   49.99
  -9  -1  -3  937.11   48.60
  -9  -1  -3  951.40   48.20
  -9  -1  -3  890.41   48.10
   9   1   3 1007.60   44.80
   9   1   3  897.81   55.29
   9   1   3 1019.40   45.30
 -10  -1  -3  210.88   17.50
 -10  -1  -3  164.88   19.80
 -10  -1  -3  195.68   20.40
 -10  -1  -3  228.68   20.40
  10   1   3  157.88   21.90
  10   1   3  197.38   13.10
  10   1   3  215.58   18.60
  10   1   3  211.88   12.80
 -11  -1  -3  238.98   17.90
 -11  -1  -3  198.08   19.70
  11   1   3  207.98   13.70
  11   1   3  192.08   22.10
  11   1   3  218.48   13.50
 -12  -1  -3   14.00    5.90
 -12  -1  -3   11.60   16.10
  12   1   3    6.40   14.00
  12   1   3   11.10    5.40
  12   1   3    9.10    3.90
  12   1   3   20.40    5.70
 -13  -1  -3   72.09    9.40
  13   1   3   73.19   14.80
  13   1   3   79.79    8.90
  13   1   3   80.09    8.00
 -14  -1  -3   33.60    5.10
  14   1   3   30.00    4.90
  15  -2  -3    4.80    5.70
  15  -2  -3   12.60    5.70
 -15   2   3   15.10    6.00
 -15   2   3   15.50    6.40
  14  -2  -3   28.90    7.80
  14  -2  -3   26.90    6.10
 -14   2   3   40.40    8.30
 -14   2   3   23.00    6.30
  13  -2  -3    3.30    7.50
  13  -2  -3    8.20    5.60
 -13   2   3    2.00    5.80
 -13   2   3    6.20    7.60
  12  -2  -3   52.29   14.90
  12  -2  -3   39.40   10.50
 -12   2   3   27.70   15.10
 -12   2   3   72.39   15.90
 -12   2   3   49.00    8.70
 -12   2   3   65.49   11.50
  11  -2  -3  -10.00    5.90
  11  -2  -3    6.40    9.00
  11  -2  -3   16.70    9.20
  11  -2  -3   -6.90   15.00
 -11   2   3    0.90    8.70
 -11   2   3    9.60    6.70
 -11   2   3   -6.00    5.80
 -11   2   3    4.60    9.40
  10  -2  -3   30.20   11.40
  10  -2  -3    3.90    6.90
  10  -2  -3   23.70    7.20
  10  -2  -3   23.90   10.10
  10  -2  -3   24.90    5.90
 -10   2   3   43.00    7.30
 -10   2   3   12.00    9.50
 -10   2   3   37.70    8.50
   9  -2  -3  217.18   17.60
   9  -2  -3  228.68   15.80
   9  -2  -3  241.48   21.90
   9  -2  -3  210.08   14.20
  -9   2   3  265.67   18.50
  -9   2   3  259.67   16.60
   8  -2  -3  328.87   18.90
   8  -2  -3  335.27   19.80
   7  -2  -3  327.47   16.50
   7  -2  -3  332.67   18.50
   7  -2  -3  339.17   18.00
   6  -2  -3  347.57   18.80
   6  -2  -3  381.96   18.00
   6  -2  -3  384.86   19.40
   5  -2  -3  158.48    9.00
   5  -2  -3  154.28    8.40
   5  -2  -3  161.38    9.30
   4  -2  -3  377.76   17.70
   4  -2  -3  376.76   18.30
   4  -2  -3  373.76   18.00
   3  -2  -3 1404.66   62.49
   3  -2  -3 1387.36   62.39
   2  -2  -3  845.82   37.10
   2  -2  -3  802.42   36.90
   1  -2  -3  231.68   10.60
   1  -2  -3  206.68   10.30
   1  -2  -3  209.08   10.10
  -1   2   3  224.68   10.10
  -1   2   3  213.98   10.20
   0  -2  -3  856.31   37.90
   0  -2  -3  863.61   37.90
   0  -2  -3  836.52   38.30
   0   2   3  826.92   37.90
  -1  -2  -3 1606.54   66.59
  -1  -2  -3 1505.45   67.29
  -1  -2  -3 1492.95   66.99
  -1  -2  -3 1452.45   66.79
   1   2   3 1423.46   66.79
  -2  -2  -3  362.46   18.60
  -2  -2  -3  398.46   18.70
  -2  -2  -3  365.56   18.30
  -2  -2  -3  403.56   17.50
   2   2   3  381.36   18.20
  -3  -2  -3  170.58    7.90
  -3  -2  -3  184.18    9.80
  -3  -2  -3  154.38    9.50
   3   2   3  160.28    9.20
  -4  -2  -3  350.46   18.50
  -4  -2  -3  338.47   18.30
   4   2   3  400.06   18.50
   4   2   3  328.47   19.80
  -5  -2  -3  348.67   18.20
  -5  -2  -3  339.67   18.40
   5   2   3  342.27   18.00
   5   2   3  267.07   23.60
  -6  -2  -3  317.47   18.20
  -6  -2  -3  293.57   18.60
   6   2   3  332.67   18.10
  -7  -2  -3  241.88   17.40
  -7  -2  -3  247.18   16.10
  -7  -2  -3  253.27   18.90
   7   2   3  239.08   14.40
   7   2   3  221.58   15.80
  -8  -2  -3    4.00    9.60
  -8  -2  -3   14.00   10.50
  -8  -2  -3   22.70    7.80
  -8  -2  -3   31.60   11.20
  -8  -2  -3   19.80    7.60
   8   2   3   27.10    4.30
   8   2   3   24.20    5.30
   8   2   3   37.80    7.80
  -9  -2  -3   -0.30    8.30
  -9  -2  -3    3.60    6.90
  -9  -2  -3   -6.70   10.60
  -9  -2  -3   28.00   10.60
   9   2   3   -0.10    4.00
   9   2   3    0.30    8.20
   9   2   3   -0.30    3.30
 -10  -2  -3   38.70    8.70
 -10  -2  -3   39.60   13.40
 -10  -2  -3   34.50   10.70
  10   2   3   38.00   11.60
  10   2   3   54.39    7.50
  10   2   3   48.80    7.00
 -11  -2  -3    6.50    5.50
 -11  -2  -3    1.80   12.40
  11   2   3    4.20    3.90
  11   2   3   11.40    4.90
  11   2   3   15.70   17.30
  11   2   3    6.90    5.40
 -12  -2  -3   19.60    5.70
  12   2   3   23.70    5.70
  12   2   3   27.00    4.50
  12   2   3   27.60    6.60
 -13  -2  -3    4.60    4.30
  13   2   3    6.90    4.30
  15  -3  -3   98.29   11.70
  15  -3  -3   82.89   10.50
 -15   3   3   85.99    9.90
 -15   3   3  114.49   12.10
  14  -3  -3   15.60    5.90
  14  -3  -3    0.80    7.00
 -14   3   3   16.70    5.80
 -14   3   3   17.90    7.60
  13  -3  -3   15.10    7.90
 -13   3   3   21.60    9.00
 -13   3   3   17.20    6.70
  12  -3  -3  131.59   15.90
  12  -3  -3   97.19   15.80
 -12   3   3  130.29   12.00
 -12   3   3  129.09   14.00
 -12   3   3  103.79   14.70
 -12   3   3   84.39   12.40
  11  -3  -3   19.50    8.70
  11  -3  -3   39.70   10.00
  11  -3  -3    3.40   13.20
  11  -3  -3   20.00    7.60
 -11   3   3   29.60    6.90
 -11   3   3   17.90   10.80
 -11   3   3   32.30    7.90
  10  -3  -3   75.39   11.20
  10  -3  -3   61.49    9.30
  10  -3  -3   68.89   10.10
  10  -3  -3   61.49   10.80
 -10   3   3   65.29   12.10
 -10   3   3   65.09    9.90
 -10   3   3   77.09   11.10
   9  -3  -3  403.66   24.20
   9  -3  -3  408.16   22.90
   8  -3  -3   56.89    6.00
   8  -3  -3   50.79    7.40
   8  -3  -3   51.39    6.80
   7  -3  -3 1172.48   53.09
   7  -3  -3 1079.09   51.39
   7  -3  -3 1129.69   52.59
   6  -3  -3 9427.56  406.46
   6  -3  -3 8819.52  405.26
   6  -3  -3 9242.67  405.96
   5  -3  -3  166.88    9.10
   5  -3  -3  161.88    8.80
   4  -3  -3  508.55   24.00
   4  -3  -3  523.25   24.00
   3  -3  -3    1.00    1.10
   3  -3  -3    2.30    1.20
   2  -3  -3 1564.24   67.09
   2  -3  -3 1520.45   66.79
   2  -3  -3 1399.76   66.49
   1  -3  -3 1446.36   65.29
   1  -3  -3 1434.06   65.59
   1  -3  -3 1482.45   65.99
   1  -3  -3 1451.85   65.59
  -1   3   3 1527.15   65.79
   0  -3  -3    0.40    1.30
   0  -3  -3   -1.80    1.80
   0  -3  -3    1.20    1.00
   0  -3  -3    2.10    1.50
   0   3   3    1.30    1.20
  -1  -3  -3  463.75   22.80
  -1  -3  -3  471.55   23.20
  -1  -3  -3  492.85   22.40
  -1  -3  -3  472.55   23.10
   1   3   3  533.85   23.10
  -2  -3  -3  147.79   10.20
  -2  -3  -3  164.88    9.40
  -2  -3  -3  173.78    8.40
  -2  -3  -3  163.38    9.50
   2   3   3  176.48    9.50
  -3  -3  -3 9383.46  421.26
  -3  -3  -3 9219.48  422.76
  -3  -3  -3 9574.34  423.06
   3   3   3 9999.00  423.06
  -4  -3  -3 1194.18   55.49
  -4  -3  -3 1140.49   55.29
   4   3   3 1226.98   55.59
  -5  -3  -3   85.49    9.00
  -5  -3  -3   70.89    7.60
   5   3   3   51.79    7.00
  -6  -3  -3  408.66   23.40
   6   3   3  441.96   24.00
  -7  -3  -3   60.79   12.60
  -7  -3  -3   86.59   12.60
  -7  -3  -3   71.39   10.60
   7   3   3   76.89    8.70
   7   3   3   68.99   10.40
   7   3   3   61.99    6.60
  -8  -3  -3   15.00   10.90
  -8  -3  -3    5.80    8.20
  -8  -3  -3   19.10    8.10
   8   3   3   27.40    5.20
   8   3   3   25.70    4.60
   8   3   3    9.80    7.40
  -9  -3  -3  123.99   14.00
  -9  -3  -3   91.49   14.50
  -9  -3  -3  109.49   14.10
   9   3   3  107.19   16.50
   9   3   3  118.99    9.20
   9   3   3  120.69    9.90
 -10  -3  -3    9.20    6.10
  10   3   3    1.50    4.20
  10   3   3   11.80    6.00
  10   3   3   16.80    4.50
 -11  -3  -3   18.50    6.00
  11   3   3   22.10    4.40
  11   3   3   17.00    5.40
  11   3   3   10.90    5.20
 -12  -3  -3  116.49   10.40
  12   3   3  116.69    8.70
  12   3   3  106.29   10.30
  16  -4  -3   -4.80    4.40
 -16   4   3    0.60    5.20
 -16   4   3   -0.30    5.70
  15  -4  -3   17.60    6.40
  15  -4  -3   22.70    6.60
 -15   4   3    4.50    7.30
 -15   4   3   20.80    5.50
  14  -4  -3   10.50    7.00
 -14   4   3    6.00    5.80
 -14   4   3   -0.50    7.90
  13  -4  -3   34.10    9.40
 -13   4   3   29.40    7.30
 -13   4   3   25.70    6.40
 -13   4   3   31.60   10.70
  12  -4  -3   16.70    8.60
  12  -4  -3   16.50   11.40
  12  -4  -3    7.10   16.20
 -12   4   3   11.90    6.70
 -12   4   3   17.60   10.20
 -12   4   3   17.10    6.10
  11  -4  -3    0.60    8.20
  11  -4  -3   -2.70   11.30
  11  -4  -3   -0.40    8.00
 -11   4   3    8.70   10.40
 -11   4   3   -4.20    6.00
 -11   4   3   -2.80    6.90
  10  -4  -3   22.90    8.80
  10  -4  -3   37.70    8.50
  10  -4  -3   26.00    7.20
 -10   4   3   43.10   14.20
 -10   4   3   33.80    8.30
 -10   4   3   48.90    8.00
   9  -4  -3   33.00    5.30
   9  -4  -3   42.80    6.70
   9  -4  -3   38.10    7.00
   8  -4  -3   86.69    8.50
   8  -4  -3   75.79    6.90
   8  -4  -3   93.39    8.00
   7  -4  -3 1170.88   53.99
   7  -4  -3 1128.49   53.29
   7  -4  -3 1146.89   52.69
   6  -4  -3  332.47   17.50
   6  -4  -3  363.56   17.20
   5  -4  -3   40.60    3.60
   5  -4  -3   34.90    3.90
   4  -4  -3   12.30    1.90
   4  -4  -3    8.50    2.00
   3  -4  -3  479.65   21.80
   3  -4  -3  449.06   21.50
   2  -4  -3  372.16   18.00
   2  -4  -3  394.26   18.30
   2  -4  -3  402.86   18.60
   2  -4  -3  377.66   18.60
   1  -4  -3  544.95   24.80
   1  -4  -3  513.05   24.60
   1  -4  -3  537.35   24.20
   1  -4  -3  537.05   24.30
  -1   4   3  481.35   24.50
   0  -4  -3   13.00    2.40
   0  -4  -3   13.60    3.00
   0  -4  -3    8.00    1.60
   0  -4  -3   12.60    2.30
   0   4   3   10.50    2.30
  -1  -4  -3   43.90    4.50
  -1  -4  -3   37.70    4.20
  -1  -4  -3   33.10    5.00
  -1  -4  -3   44.60    3.40
   1   4   3   40.80    4.20
  -2  -4  -3  400.46   20.00
  -2  -4  -3  378.66   21.00
  -2  -4  -3  400.46   20.00
  -2  -4  -3  436.86   18.80
   2   4   3  353.46   19.80
  -3  -4  -3 1178.28   56.19
  -3  -4  -3 1226.58   54.49
  -3  -4  -3 1212.78   56.39
   3   4   3 1222.98   56.59
  -4  -4  -3   92.39    8.40
  -4  -4  -3   93.39    9.80
   4   4   3   85.59    8.20
  -5  -4  -3   34.70    6.00
   5   4   3   30.20    5.80
   5   4   3   35.60    5.20
  -6  -4  -3   46.10    8.70
  -6  -4  -3   31.30    6.90
  -6  -4  -3   35.80   13.60
   6   4   3   35.70    4.90
   6   4   3   35.80    5.70
   6   4   3   53.99    8.90
  -7  -4  -3   -2.00   10.90
  -7  -4  -3   -7.10    6.70
  -7  -4  -3   -8.20    7.70
   7   4   3    1.80    6.90
   7   4   3    0.80    3.30
   7   4   3    7.80    4.50
  -8  -4  -3   17.10   11.00
  -8  -4  -3   19.30   11.10
  -8  -4  -3   24.60    7.80
   8   4   3   14.90    8.80
   8   4   3   24.60    4.80
   8   4   3   23.60    7.40
   8   4   3   24.00    5.30
  -9  -4  -3   37.70    8.30
   9   4   3   30.00    6.70
   9   4   3   22.20    4.90
   9   4   3   29.50    5.10
 -10  -4  -3   17.20    6.00
  10   4   3   21.20    4.60
  10   4   3   14.20    5.70
  10   4   3   14.90    4.70
 -11  -4  -3   15.50    5.00
  11   4   3   22.10    4.10
  11   4   3   21.00    5.80
  11   4   3   16.50    5.40
 -12  -4  -3    8.00    4.10
  12   4   3    3.20    4.00
  16  -5  -3   20.10    5.50
 -16   5   3   15.60    7.10
 -16   5   3   18.90    5.00
  15  -5  -3   17.20    6.70
  15  -5  -3    8.20    6.00
 -15   5   3   27.00    8.50
 -15   5   3   26.10    5.80
  14  -5  -3    8.40    6.80
 -14   5   3   25.90   10.20
 -14   5   3    5.80    5.90
 -14   5   3    5.10    6.00
  13  -5  -3   39.70    9.70
  13  -5  -3   31.20   20.60
 -13   5   3   19.90   10.30
 -13   5   3   50.19    8.60
 -13   5   3   47.90    7.00
  12  -5  -3   61.49   12.80
  12  -5  -3   57.09   10.10
  12  -5  -3   55.89   15.80
 -12   5   3   56.29    8.00
 -12   5   3   46.50   11.90
 -12   5   3   60.39    9.50
  11  -5  -3   22.80    8.80
  11  -5  -3   31.70   10.40
  11  -5  -3   24.60    8.60
 -11   5   3   26.20    7.00
 -11   5   3   27.90    8.30
 -11   5   3   52.99   13.30
  10  -5  -3  408.36   25.10
  10  -5  -3  407.36   24.20
  10  -5  -3  416.46   25.30
 -10   5   3  424.76   24.00
 -10   5   3  424.76   25.90
   9  -5  -3   28.90    6.00
   9  -5  -3   26.10    5.10
   9  -5  -3   23.90    6.20
   8  -5  -3   55.19    6.20
   8  -5  -3   64.29    7.90
   8  -5  -3   61.49    7.10
   7  -5  -3  343.47   17.80
   7  -5  -3  331.67   17.20
   6  -5  -3   23.90    3.40
   6  -5  -3   17.80    3.20
   5  -5  -3  343.17   16.80
   5  -5  -3  336.67   16.90
   4  -5  -3   42.40    3.60
   4  -5  -3   41.00    4.00
   3  -5  -3  155.08    9.70
   3  -5  -3  156.78    9.20
   3  -5  -3  161.28    9.00
   3  -5  -3  168.38    8.80
   3  -5  -3  159.78    8.70
   2  -5  -3  167.38   10.00
   2  -5  -3  165.38    9.10
   2  -5  -3  173.08    9.50
   2  -5  -3  175.48    9.20
   1  -5  -3   45.40    4.40
   1  -5  -3   47.50    4.20
   1  -5  -3   34.20    5.50
   1  -5  -3   43.50    3.80
  -1   5   3   44.50    4.50
   0  -5  -3  342.57   17.50
   0  -5  -3  327.17   18.10
   0  -5  -3  347.97   17.30
   0  -5  -3  350.46   16.90
   0   5   3  354.86   17.80
  -1  -5  -3   29.00    6.20
  -1  -5  -3   31.90    3.40
  -1  -5  -3   27.40    4.20
  -1  -5  -3   21.00    3.70
   1   5   3   18.30    3.70
  -2  -5  -3  341.57   19.20
  -2  -5  -3  368.56   17.80
  -2  -5  -3  377.26   19.30
   2   5   3  366.96   19.50
  -3  -5  -3   57.59    5.50
  -3  -5  -3   58.39    6.90
  -3  -5  -3   58.59    9.20
   3   5   3   66.49    7.40
   3   5   3   74.79    6.30
  -4  -5  -3   41.20    6.30
   4   5   3   35.70    5.40
   4   5   3   37.00    6.10
  -5  -5  -3  431.66   25.80
  -5  -5  -3  399.76   23.90
   5   5   3  443.86   21.80
   5   5   3  413.56   22.80
   5   5   3  451.55   25.20
  -6  -5  -3   26.10   11.40
  -6  -5  -3   43.30    8.70
  -6  -5  -3   34.60    8.80
   6   5   3   34.90    5.00
   6   5   3   22.50    7.20
   6   5   3   21.40    7.60
   6   5   3   37.00    6.10
  -7  -5  -3   47.60   12.70
  -7  -5  -3   55.39   11.60
  -7  -5  -3   84.89   12.90
   7   5   3   63.79    9.50
   7   5   3   63.49    7.20
   7   5   3   53.99    8.50
   7   5   3   68.09   11.30
  -8  -5  -3   39.30    7.70
   8   5   3   18.20   17.30
   8   5   3   23.70    7.30
   8   5   3   34.20    5.40
   8   5   3   25.80    5.50
  -9  -5  -3    3.80    5.60
   9   5   3    7.10    6.00
   9   5   3    4.90    4.00
   9   5   3   11.80    4.40
 -10  -5  -3   12.60    5.40
  10   5   3    8.40    5.20
  10   5   3    9.50    5.00
  10   5   3   15.30    3.90
 -11  -5  -3   17.50    4.60
  11   5   3   16.50    3.80
  11   5   3   17.20    5.00
  16  -6  -3    9.20    5.00
 -16   6   3    1.80    4.40
 -16   6   3   10.40    7.80
  15  -6  -3   66.29   10.90
 -15   6   3   52.99   10.70
 -15   6   3   66.19    9.60
  14  -6  -3   65.79    9.90
 -14   6   3   56.89    6.90
 -14   6   3   57.39   12.10
 -14   6   3   56.69    8.70
  13  -6  -3   87.29   13.50
  13  -6  -3   38.30   16.20
 -13   6   3   86.89   10.70
 -13   6   3   90.39   13.50
 -13   6   3   82.59   12.30
  12  -6  -3   15.10   13.70
  12  -6  -3   30.30   12.40
  12  -6  -3   54.09   10.10
 -12   6   3   31.90    7.00
 -12   6   3   51.19   14.60
 -12   6   3   27.20    8.00
  11  -6  -3   22.50    7.90
  11  -6  -3   32.30   10.20
  11  -6  -3   29.30    9.80
 -11   6   3   51.79    9.40
 -11   6   3   26.50   14.80
 -11   6   3   24.10    7.00
  10  -6  -3   38.10    7.00
  10  -6  -3   44.10    8.60
  10  -6  -3   41.60    9.10
  10  -6  -3   46.20    8.00
 -10   6   3   38.50    7.70
 -10   6   3   36.40    8.40
   9  -6  -3  393.06   21.10
   9  -6  -3  428.46   23.20
   9  -6  -3  375.96   22.20
   8  -6  -3  319.87   17.90
   8  -6  -3  313.57   17.00
   7  -6  -3   44.10    5.10
   7  -6  -3   49.80    6.10
   6  -6  -3    2.90    2.70
   6  -6  -3    4.70    2.20
   5  -6  -3   21.30    3.30
   5  -6  -3   27.30    3.70
   4  -6  -3  380.06   21.00
   4  -6  -3  425.86   19.80
   4  -6  -3  396.96   19.90
   4  -6  -3  393.66   19.50
   3  -6  -3 8910.11  407.16
   3  -6  -3 9238.08  406.66
   3  -6  -3 9100.59  406.26
   3  -6  -3 9485.05  407.06
   2  -6  -3  342.97   19.00
   2  -6  -3  356.26   18.00
   2  -6  -3  371.76   18.40
   2  -6  -3  372.36   18.00
   2  -6  -3  364.76   18.20
   1  -6  -3   26.10    3.50
   1  -6  -3   19.00    3.70
   1  -6  -3   15.90    5.60
   1  -6  -3   23.00    3.50
   1  -6  -3   27.60    3.80
  -1   6   3   22.30    3.70
   0  -6  -3    3.90    2.60
   0  -6  -3   -2.80    3.40
   0  -6  -3    0.10    3.40
   0  -6  -3    2.60    2.00
   0  -6  -3    0.70    6.30
   0   6   3   -1.60    2.60
  -1  -6  -3   52.19    5.00
  -1  -6  -3   50.19    5.80
  -1  -6  -3   45.70    5.70
  -1  -6  -3   43.00    6.00
   1   6   3   52.29    6.50
  -2  -6  -3  364.06   17.30
  -2  -6  -3  335.87   18.70
   2   6   3  318.57   19.20
   2   6   3  320.07   17.20
  -3  -6  -3  410.26   22.70
   3   6   3  395.96   20.80
   3   6   3  437.46   23.70
  -4  -6  -3   33.20    6.90
  -4  -6  -3   44.20    8.80
  -4  -6  -3   17.00   13.60
   4   6   3   36.50    7.10
   4   6   3   32.00    9.00
   4   6   3   36.80    4.90
   4   6   3   37.10    6.40
  -5  -6  -3   37.90   11.20
  -5  -6  -3   32.40    8.40
  -5  -6  -3   32.00    8.10
   5   6   3   29.10    8.10
   5   6   3   34.90    5.00
   5   6   3   37.30    8.70
   5   6   3   25.20    5.70
  -6  -6  -3   19.70   11.00
  -6  -6  -3   22.60    7.70
  -6  -6  -3   30.90   10.90
   6   6   3   24.00    8.70
   6   6   3   38.70    5.40
   6   6   3   31.50    6.00
   6   6   3   37.50    8.30
  -7  -6  -3   99.99   12.30
   7   6   3   83.89    9.10
   7   6   3   85.59    8.60
   7   6   3  119.19   13.80
   7   6   3   60.79   12.90
  -8  -6  -3   65.49   10.50
   8   6   3   74.39    8.40
   8   6   3   59.59    7.90
   8   6   3   82.09   12.30
  -9  -6  -3   66.49    9.20
   9   6   3   77.19   10.60
   9   6   3   53.19    8.20
   9   6   3   67.29    7.50
 -10  -6  -3    4.60    4.10
  10   6   3    8.60    3.30
  10   6   3    5.00    4.60
  16  -7  -3    1.50    4.30
 -16   7   3    2.00    4.40
 -16   7   3   -0.70    8.40
  15  -7  -3   67.09   10.60
 -15   7   3   56.09    8.00
 -15   7   3   61.19   12.30
  14  -7  -3   76.99   12.10
 -14   7   3   41.20    7.80
 -14   7   3   66.69   12.80
 -14   7   3   64.39    9.30
  13  -7  -3   77.79   16.10
  13  -7  -3  114.39   13.80
 -13   7   3   90.19   13.20
 -13   7   3   74.09    9.00
 -13   7   3   71.49   14.10
  12  -7  -3   48.20    8.90
  12  -7  -3   65.89   13.40
 -12   7   3   68.39   16.30
 -12   7   3   73.09   10.80
 -12   7   3   87.39   11.40
  11  -7  -3    6.00   10.60
  11  -7  -3   -4.30    7.40
  11  -7  -3   -6.20    7.90
 -11   7   3   11.10   16.10
 -11   7   3    5.40    6.30
 -11   7   3    0.90    7.40
  10  -7  -3   44.80    8.80
  10  -7  -3   74.69   10.60
  10  -7  -3   64.69    9.60
 -10   7   3   54.89    8.60
 -10   7   3   32.00    8.70
   9  -7  -3  231.38   16.30
   9  -7  -3  252.87   16.10
   9  -7  -3  258.67   18.40
   9  -7  -3  253.97   15.10
  -9   7   3  218.38   17.70
  -9   7   3  246.08   19.20
   8  -7  -3   94.09    8.10
   8  -7  -3   86.79    9.20
   7  -7  -3  541.85   26.60
   7  -7  -3  529.15   26.80
   6  -7  -3   44.80    5.20
   6  -7  -3   45.50    6.20
   5  -7  -3  343.67   18.30
   5  -7  -3  372.86   18.40
   4  -7  -3 1221.28   54.39
   4  -7  -3 1140.69   53.79
   4  -7  -3 1096.39   55.29
   4  -7  -3 1233.68   54.29
   3  -7  -3 1086.29   55.89
   3  -7  -3 1219.48   54.89
   3  -7  -3 1220.08   55.19
   3  -7  -3 1256.17   54.89
   3  -7  -3 1151.68   54.39
   2  -7  -3  336.27   18.20
   2  -7  -3  350.16   18.40
   2  -7  -3  366.76   18.20
   2  -7  -3  328.37   20.30
   2  -7  -3  364.96   18.00
   1  -7  -3   44.10    6.00
   1  -7  -3   45.20    7.40
   1  -7  -3   43.40    5.40
   1  -7  -3   30.30    8.50
   1  -7  -3   45.60    4.90
  -1   7   3   61.39    6.80
   0  -7  -3  545.95   27.40
   0  -7  -3  564.84   28.20
   0  -7  -3  595.04   27.50
   0   7   3  543.05   27.20
   0   7   3  566.04   29.20
  -1  -7  -3   63.99    9.00
  -1  -7  -3   96.19    8.50
  -1  -7  -3   94.09    7.50
   1   7   3  102.29    9.70
   1   7   3   88.89    7.60
  -2  -7  -3  248.68   18.50
  -2  -7  -3  230.78   15.50
  -2  -7  -3  250.97   14.40
   2   7   3  271.57   17.30
   2   7   3  256.17   14.30
  -3  -7  -3   70.89   10.00
  -3  -7  -3   59.49    8.50
  -3  -7  -3   40.10   11.40
   3   7   3   65.49   10.60
   3   7   3   68.09    7.10
   3   7   3   77.39   10.80
   3   7   3   86.59   11.60
  -4  -7  -3    2.60    6.70
  -4  -7  -3    6.20   10.40
  -4  -7  -3   -0.50    7.50
   4   7   3    4.00    3.60
   4   7   3   -1.00    5.30
   4   7   3    5.10    8.00
   4   7   3   12.20    7.20
  -5  -7  -3   60.09   11.40
  -5  -7  -3   55.79   11.80
  -5  -7  -3   89.49   12.10
   5   7   3   66.39    7.80
   5   7   3   67.49   10.70
   5   7   3   62.49    9.20
   5   7   3   47.80   10.10
  -6  -7  -3   94.59   12.00
   6   7   3   78.59   14.20
   6   7   3   87.99    8.90
   6   7   3   97.89   10.00
   6   7   3   99.49   14.10
  -7  -7  -3   75.19   10.50
   7   7   3   58.89    9.30
   7   7   3   57.19    8.40
   7   7   3   63.19    8.20
  -8  -7  -3   61.19    9.00
   8   7   3   54.99    8.20
   8   7   3   58.79    7.30
   8   7   3   53.89    7.80
  -9  -7  -3    3.80    4.20
   9   7   3    1.60    4.40
   9   7   3    7.30    3.40
  16  -8  -3   17.30    5.20
 -16   8   3   25.80    9.90
 -16   8   3    9.40    4.60
  15  -8  -3   44.00    8.10
 -15   8   3   63.69   13.20
 -15   8   3   63.09    9.70
 -15   8   3   65.79    8.60
  14  -8  -3   71.79    9.80
 -14   8   3   61.89    9.30
 -14   8   3   52.99    8.40
 -14   8   3   62.79   13.60
  13  -8  -3   39.60    8.40
  13  -8  -3   40.00   14.70
 -13   8   3   28.40    8.40
 -13   8   3   30.30   14.90
 -13   8   3   22.50    6.20
  12  -8  -3   22.60    7.90
  12  -8  -3   26.40   10.20
 -12   8   3   31.00    7.00
 -12   8   3   -0.60   16.40
 -12   8   3   12.10    8.10
  11  -8  -3   19.40    9.60
  11  -8  -3   32.00    8.20
  11  -8  -3   10.80    9.10
 -11   8   3   24.40    8.10
 -11   8   3   13.80    6.60
  10  -8  -3   20.40    7.70
  10  -8  -3   19.40    7.00
  10  -8  -3   26.90   11.00
  10  -8  -3   33.70    7.00
 -10   8   3   33.70    7.30
 -10   8   3   30.30    8.50
   9  -8  -3  247.48   21.90
   9  -8  -3  259.47   18.90
   9  -8  -3  257.67   16.30
  -9   8   3  275.77   20.50
  -9   8   3  278.17   18.60
   8  -8  -3  204.48   12.90
   8  -8  -3  185.78   16.50
   5  -8  -3   49.90    5.30
   4  -8  -3  104.79    7.40
   4  -8  -3   79.29    7.40
   3  -8  -3   72.99    7.00
   3  -8  -3   70.49    6.20
   2  -8  -3  323.27   16.90
   2  -8  -3  301.67   17.30
   2  -8  -3  316.67   17.20
  -2   8   3  312.07   16.90
   1  -8  -3   90.69    8.40
   1  -8  -3   91.29    8.50
   1  -8  -3   95.59    7.60
  -1   8   3   97.19    9.70
  -1   8   3   90.39    8.30
   0  -8  -3  192.18   13.10
   0  -8  -3  211.58   12.50
   0  -8  -3  203.68   13.00
   0   8   3  203.28   14.70
   0   8   3  179.78   12.10
  -1  -8  -3  242.18   18.50
  -1  -8  -3  206.38   25.10
  -1  -8  -3  245.98   16.20
  -1  -8  -3  273.67   15.60
   1   8   3  238.18   21.40
   1   8   3  231.98   18.30
   1   8   3  306.17   18.70
   1   8   3  274.27   15.00
  -2  -8  -3   32.00    7.60
  -2  -8  -3   19.30    6.50
  -2  -8  -3   35.00    9.80
   2   8   3   19.90    9.70
   2   8   3   26.30    7.40
   2   8   3   25.10    6.90
   2   8   3   26.10    4.70
  -3  -8  -3   25.10    7.10
  -3  -8  -3   25.30   10.00
  -3  -8  -3   23.00    8.30
   3   8   3   23.20    8.90
   3   8   3   24.90    6.90
   3   8   3   31.80    5.40
   3   8   3   20.00    8.90
  -4  -8  -3   23.00    6.60
  -4  -8  -3   23.90   10.90
  -4  -8  -3   19.30    9.60
   4   8   3   16.00    8.50
   4   8   3   13.50    5.50
   4   8   3   17.50    4.80
   4   8   3    9.40    9.10
  -5  -8  -3   33.40    7.40
   5   8   3   43.30    6.10
   5   8   3   39.00    6.20
   5   8   3   56.09    9.70
  -6  -8  -3   54.99    7.90
   6   8   3   69.29    9.70
   6   8   3   54.59    8.40
   6   8   3   56.69    8.00
  -7  -8  -3   63.29    8.90
   7   8   3   54.69    7.30
   7   8   3   38.10    7.50
  -8  -8  -3   11.60    4.50
   8   8   3   14.60    3.60
   8   8   3    7.80    5.00
  16  -9  -3    2.10    4.40
 -16   9   3   -9.40   11.40
 -16   9   3    1.60    4.40
  15  -9  -3   69.29   10.10
 -15   9   3   68.29   14.80
 -15   9   3   54.69    6.60
 -15   9   3   67.09   10.10
  14  -9  -3    8.10    6.30
 -14   9   3    4.60    4.80
 -14   9   3    5.80   14.20
 -14   9   3    1.10    5.90
  13  -9  -3   30.50    7.70
  13  -9  -3   18.70   13.40
 -13   9   3   27.50    6.60
 -13   9   3   20.10    7.40
 -13   9   3   31.10   16.80
  12  -9  -3  107.29   17.10
  12  -9  -3  139.29   14.60
 -12   9   3  123.49   12.80
 -12   9   3  124.89   15.30
  11  -9  -3    3.70   10.90
  11  -9  -3    1.50    9.50
  11  -9  -3   -6.10    6.60
  11  -9  -3   -2.70    8.50
 -11   9   3   12.40    7.60
 -11   9   3    2.20    6.20
  10  -9  -3 1004.70   49.99
  10  -9  -3 1009.50   50.19
  10  -9  -3  895.81   48.60
  10  -9  -3  962.40   51.29
 -10   9   3 1020.60   49.30
 -10   9   3 1069.69   51.69
   9  -9  -3  697.53   38.70
   9  -9  -3  669.53   35.60
   9  -9  -3  718.83   37.30
  -9   9   3  701.73   38.30
  -9   9   3  715.33   36.70
   8  -9  -3  285.97   19.20
   8  -9  -3  300.37   21.60
   8  -9  -3  250.17   16.30
  -8   9   3  271.47   21.70
  -8   9   3  274.27   19.50
   7  -9  -3  240.08   14.90
   7  -9  -3  239.28   18.00
   6  -9  -3  436.86   23.10
   5  -9  -3   35.50    5.40
   4  -9  -3   38.20    5.70
   3  -9  -3  411.56   22.20
   3  -9  -3  431.76   22.30
   2  -9  -3  240.68   18.20
   2  -9  -3  251.37   15.20
   2  -9  -3  245.28   15.50
   2  -9  -3  271.87   15.10
   1  -9  -3  267.77   16.10
   1  -9  -3  276.27   15.90
   1  -9  -3  273.07   16.60
   1  -9  -3  241.68   18.40
   1  -9  -3  256.07   19.90
  -1   9   3  227.58   26.70
  -1   9   3  262.87   15.30
   0  -9  -3  692.13   35.80
   0  -9  -3  703.03   35.00
   0  -9  -3  634.64   36.40
   0  -9  -3  636.24   33.80
   0  -9  -3  723.23   34.40
   0   9   3  740.43   37.50
   0   9   3  650.63   35.30
   0   9   3  664.83   33.50
   0   9   3  699.93   38.80
  -1  -9  -3 1022.00   48.30
  -1  -9  -3  921.91   47.10
  -1  -9  -3  890.41   48.40
   1   9   3  939.21   46.80
   1   9   3  972.80   45.80
   1   9   3  972.30   49.70
   1   9   3  965.30   49.80
  -2  -9  -3   -0.50    8.50
  -2  -9  -3   -1.60    8.00
  -2  -9  -3    2.30    6.30
   2   9   3    2.90    3.90
   2   9   3   -7.60    8.00
   2   9   3   11.40    8.70
   2   9   3    1.20    5.60
  -3  -9  -3  128.39   16.20
  -3  -9  -3  117.19   13.10
   3   9   3  124.09   15.70
   3   9   3  132.29   10.60
   3   9   3  108.59   17.70
   3   9   3  138.39   12.20
  -4  -9  -3   29.40    6.90
   4   9   3   29.60    8.20
   4   9   3   15.00    5.50
   4   9   3   29.80    5.40
  -5  -9  -3    4.20    5.30
   5   9   3    1.40    4.40
   5   9   3   14.40    6.50
  -6  -9  -3   62.29    8.70
   6   9   3   81.09   11.30
   6   9   3   66.39    8.00
  -7  -9  -3    3.10    4.30
   7   9   3    1.30    4.50
   7   9   3    1.10    3.10
  16 -10  -3    3.70    4.20
 -16  10   3    4.20   21.50
 -16  10   3    9.90    4.70
  15 -10  -3   14.60    5.50
 -15  10   3    2.50   15.50
 -15  10   3   10.30    4.80
 -15  10   3   21.00    6.10
  14 -10  -3   16.50    6.10
 -14  10   3   20.60    5.40
 -14  10   3   25.20    7.20
  13 -10  -3   13.30    6.60
 -13  10   3    6.20    5.40
 -13  10   3    4.00    6.90
  12 -10  -3   43.60   11.10
  12 -10  -3   54.89    9.00
  12 -10  -3   26.70   10.70
 -12  10   3   56.39    9.70
 -12  10   3   65.99   10.00
  11 -10  -3  233.48   17.30
  11 -10  -3  192.78   19.30
  11 -10  -3  204.08   18.60
  11 -10  -3  187.28   19.50
 -11  10   3  192.98   18.60
 -11  10   3  174.98   15.40
  10 -10  -3   14.00    7.30
  10 -10  -3    5.90    8.20
  10 -10  -3   37.80    8.00
 -10  10   3   31.40    8.80
 -10  10   3   18.10    6.70
   9 -10  -3 1112.99   51.99
   9 -10  -3  950.70   50.39
   9 -10  -3 1133.19   53.09
  -9  10   3  990.50   50.99
  -9  10   3  970.30   52.69
   8 -10  -3   27.80    6.50
   8 -10  -3   27.90    7.90
   8 -10  -3   31.20    9.10
  -8  10   3   36.80    9.90
  -8  10   3   18.80    7.60
   7 -10  -3   60.99    9.10
   7 -10  -3   70.29    8.70
  -7  10   3   66.89    9.60
  -7  10   3   64.09   11.90
   6 -10  -3   37.00    5.90
   6 -10  -3   53.89    8.70
   6 -10  -3   33.00    8.40
  -6  10   3   46.30    9.90
  -6  10   3   46.40   11.60
   5 -10  -3  446.76   25.50
   5 -10  -3  437.36   23.60
   5 -10  -3  447.06   26.20
  -5  10   3  412.86   29.60
  -5  10   3  433.96   26.70
   4 -10  -3   51.19    8.70
   4 -10  -3   56.49    8.80
   4 -10  -3   38.80    6.00
  -4  10   3   16.70   12.20
   3 -10  -3   76.39    9.70
   3 -10  -3   63.19    8.10
   3 -10  -3   63.49    9.50
  -3  10   3   62.89    9.70
  -3  10   3   90.59   13.30
   2 -10  -3   23.10    8.30
   2 -10  -3   25.70    5.70
   2 -10  -3   34.30    7.90
  -2  10   3   29.70   11.30
  -2  10   3   17.00    8.10
   1 -10  -3 1010.90   48.60
   1 -10  -3  918.51   48.80
   1 -10  -3  970.40   47.30
  -1  10   3  928.61   47.80
  -1  10   3 1016.60   50.79
   0 -10  -3   31.00    7.40
   0 -10  -3   43.60    9.20
   0 -10  -3   17.00    7.40
   0 -10  -3   14.40    7.30
   0  10   3   19.30    9.40
   0  10   3   28.10    7.50
  -1 -10  -3  161.88   17.00
  -1 -10  -3  159.98   18.30
  -1 -10  -3  189.78   15.50
   1  10   3  193.58   18.70
   1  10   3  206.78   15.20
   1  10   3  173.08   19.50
  -2 -10  -3   45.50    9.50
  -2 -10  -3   54.59    8.20
   2  10   3   35.30    9.30
   2  10   3   38.80   13.10
   2  10   3   44.40    7.00
  -3 -10  -3    5.50    5.50
   3  10   3   10.10    5.50
   3  10   3   10.20    7.40
  -4 -10  -3    9.80    5.50
   4  10   3   14.90    4.80
   4  10   3   16.40    6.80
  -5 -10  -3   12.80    5.00
   5  10   3   11.50    4.10
   5  10   3   11.80    6.00
  -6 -10  -3    4.70    4.30
   6  10   3    3.50    3.30
   6  10   3    2.10    4.80
  16 -11  -3   20.70    4.80
 -16  11   3   10.70    4.60
  15 -11  -3   12.70    4.90
 -15  11   3   22.60    4.80
 -15  11   3    7.80    5.30
  14 -11  -3   19.60    6.00
 -14  11   3   12.60    5.10
 -14  11   3   18.20    6.70
  13 -11  -3   13.20   11.10
  13 -11  -3    9.60    5.70
 -13  11   3   15.10    6.80
 -13  11   3   10.00    5.50
  12 -11  -3  176.78   19.20
  12 -11  -3  189.78   21.50
  12 -11  -3  251.07   17.10
 -12  11   3  227.48   16.20
 -12  11   3  205.18   18.40
  11 -11  -3   60.49    9.30
  11 -11  -3   58.59   12.50
  11 -11  -3   55.09   10.80
  11 -11  -3   48.00   10.90
 -11  11   3   73.59   10.90
 -11  11   3   51.89    8.40
  10 -11  -3  188.98   17.50
  10 -11  -3  211.78   18.30
  10 -11  -3  182.98   16.40
 -10  11   3  238.38   16.90
 -10  11   3  218.28   19.50
   9 -11  -3    6.70    7.30
   9 -11  -3    8.30    6.50
   9 -11  -3    5.80    6.70
  -9  11   3    1.40    6.40
  -9  11   3    2.30    8.50
   8 -11  -3   33.00    7.70
   8 -11  -3   30.80    8.30
   8 -11  -3   20.90    6.80
  -8  11   3   21.10    9.60
  -8  11   3   19.70    7.70
   7 -11  -3    1.30    5.20
   7 -11  -3   -0.80    6.80
  -7  11   3    3.70    9.50
  -7  11   3    2.80    7.30
   6 -11  -3   26.00    6.20
   6 -11  -3   47.90    8.50
   6 -11  -3   29.10    8.80
  -6  11   3   30.80   10.90
  -6  11   3   38.70    8.80
   5 -11  -3   29.10    6.60
   5 -11  -3   36.80    7.90
   5 -11  -3   37.00    8.10
  -5  11   3   26.20   10.70
  -5  11   3   43.70    9.30
   4 -11  -3   -2.10    7.30
   4 -11  -3   -7.20    6.50
   4 -11  -3    3.10    5.10
  -4  11   3    3.70   10.50
  -4  11   3   -5.10    7.60
   3 -11  -3   25.30    7.60
   3 -11  -3   25.50    6.90
   3 -11  -3   26.80    8.40
  -3  11   3   30.10   10.50
  -3  11   3   17.30    8.00
   2 -11  -3   -0.70    6.70
   2 -11  -3   -1.10    6.40
   2 -11  -3    6.10    7.00
  -2  11   3   11.60    9.50
  -2  11   3    8.10    6.70
   1 -11  -3  192.18   17.30
   1 -11  -3  214.78   16.70
   1 -11  -3  198.18   17.10
   1 -11  -3  227.48   19.40
  -1  11   3  228.18   16.10
  -1  11   3  209.08   20.30
   0 -11  -3   59.49    9.30
   0 -11  -3   60.09    8.70
   0  11   3   74.29   10.40
   0  11   3   50.29   10.60
  -1 -11  -3  199.18   15.90
  -1 -11  -3  186.38   16.70
   1  11   3  233.88   15.70
   1  11   3  236.48   19.30
  -2 -11  -3   12.20    5.70
   2  11   3    4.80    5.00
   2  11   3   12.10    7.40
  -3 -11  -3   20.50    5.60
   3  11   3   11.50    4.70
   3  11   3   16.00    7.10
  -4 -11  -3   14.60    5.00
   4  11   3   13.20    6.20
   4  11   3   15.60    4.20
   5  11   3   16.40    5.40
  16 -12  -3    7.40    4.00
 -16  12   3    1.10    4.10
  15 -12  -3  110.19    9.80
 -15  12   3   89.89   10.80
 -15  12   3  104.19    8.90
  14 -12  -3   21.10    5.80
 -14  12   3   28.40    5.60
 -14  12   3   38.50    7.50
  13 -12  -3   15.70    5.80
  13 -12  -3   25.50    9.30
 -13  12   3   12.10    6.70
 -13  12   3   15.00    5.30
  12 -12  -3    9.40    8.00
  12 -12  -3   21.90    6.40
 -12  12   3   12.80    5.90
 -12  12   3   19.30    7.40
  11 -12  -3  197.68   19.60
  11 -12  -3  207.38   18.50
  11 -12  -3  238.68   16.90
 -11  12   3  240.28   16.60
 -11  12   3  233.78   19.50
  10 -12  -3   41.10   11.20
  10 -12  -3   51.89    8.30
  10 -12  -3   43.70    8.80
 -10  12   3   39.80    7.40
 -10  12   3   40.00    9.50
   9 -12  -3   90.19   13.90
   9 -12  -3  131.99   13.00
   9 -12  -3  110.19   14.30
  -9  12   3  130.19   16.20
  -9  12   3  113.49   13.40
   8 -12  -3   17.30    7.60
   8 -12  -3   15.40    7.80
   8 -12  -3   13.40    6.50
  -8  12   3   23.00    7.60
  -8  12   3   22.40    9.50
   7 -12  -3   60.69    9.20
   7 -12  -3   81.79   11.90
   7 -12  -3   61.29    9.70
  -7  12   3   98.89   12.80
  -7  12   3   74.59   11.80
   6 -12  -3   36.00    7.70
   6 -12  -3   33.50    8.00
   6 -12  -3   39.70    7.80
  -6  12   3   44.70    8.40
  -6  12   3   35.10   10.80
   5 -12  -3   81.59   11.00
   5 -12  -3   80.69   12.00
   5 -12  -3   78.89   11.10
  -5  12   3   75.69   12.20
  -5  12   3   74.39   10.40
   4 -12  -3   24.20    7.90
   4 -12  -3   19.90    7.00
   4 -12  -3    8.60    6.70
  -4  12   3   20.00    9.90
  -4  12   3   16.70    7.40
   3 -12  -3  122.89   14.40
   3 -12  -3  115.89   13.40
   3 -12  -3  133.39   14.40
  -3  12   3  118.29   17.60
  -3  12   3  124.09   13.60
   2 -12  -3   30.50   10.50
   2 -12  -3   49.00    8.90
   2 -12  -3   43.30    7.90
   2 -12  -3   62.69   10.40
  -2  12   3   47.40   11.30
   1 -12  -3  234.88   16.50
   1 -12  -3  237.18   19.40
   1 -12  -3  209.68   18.00
  -1  12   3  246.68   16.40
  -1  12   3  211.08   19.80
   0 -12  -3    9.70   14.60
   0 -12  -3   15.40    5.90
   0 -12  -3    6.00    7.90
   0  12   3   13.80    8.20
   0  12   3   13.80    5.60
  -1 -12  -3   20.60    5.80
   1  12   3   19.80    5.40
   1  12   3   12.70    7.10
  -2 -12  -3   33.60    5.80
   2  12   3   37.20    5.60
   2  12   3   26.50    7.40
  -3 -12  -3  101.39    9.30
   3  12   3  102.59   11.20
   4  12   3    2.10    4.80
   4  12   3    8.20    3.50
  15 -13  -3   10.90    4.20
 -15  13   3    8.60    5.10
 -15  13   3   13.90    4.30
  14 -13  -3   75.39    8.80
 -14  13   3   76.79    8.50
 -14  13   3   82.99   10.90
  13 -13  -3    4.90    4.70
  13 -13  -3   10.30    7.40
 -13  13   3    7.70    4.70
 -13  13   3   11.00    6.20
  12 -13  -3    8.60    5.30
  12 -13  -3   10.00    7.60
 -12  13   3   14.20    5.50
 -12  13   3    9.20    6.70
  11 -13  -3   14.10    6.70
  11 -13  -3    1.50    5.40
 -11  13   3   13.40    5.70
 -11  13   3    8.20    7.20
  10 -13  -3   -4.90    6.60
  10 -13  -3   11.30    5.50
 -10  13   3   17.20    6.10
 -10  13   3   18.10    7.90
   9 -13  -3   32.70    6.60
   9 -13  -3   31.30    8.30
  -9  13   3   25.60    8.90
  -9  13   3   28.80    7.10
   8 -13  -3   20.60    7.30
   8 -13  -3   27.60    6.80
  -8  13   3   30.00    7.00
  -8  13   3   35.50    9.30
   7 -13  -3  107.49   12.10
   7 -13  -3   86.19   12.50
  -7  13   3  108.79   12.70
  -7  13   3   95.69   13.30
   6 -13  -3   93.09   12.70
   6 -13  -3   72.99   11.60
  -6  13   3   81.39   12.50
  -6  13   3   92.99   12.60
   5 -13  -3   37.40    7.50
   5 -13  -3   56.59    9.40
   5 -13  -3   46.00    8.40
  -5  13   3   24.90    9.80
  -5  13   3   28.20    7.90
   4 -13  -3   28.70    8.30
   4 -13  -3   29.20    7.70
   4 -13  -3   34.70    6.80
  -4  13   3   34.30    7.80
  -4  13   3   26.90    9.50
   3 -13  -3   14.00    7.20
   3 -13  -3   13.60    7.30
   3 -13  -3    6.90    5.90
  -3  13   3    6.30    8.50
  -3  13   3   15.30    6.40
   2 -13  -3   -3.40    6.60
   2 -13  -3   10.90    5.70
   2 -13  -3   -0.50    6.70
  -2  13   3   12.20    6.00
  -2  13   3    2.30    8.00
   1 -13  -3   13.50    5.50
   1 -13  -3   14.20    7.60
   1 -13  -3   -4.50    7.80
  -1  13   3   14.80    7.80
  -1  13   3   17.50    5.60
   0 -13  -3   11.00    5.20
   0  13   3   11.80    4.70
   0  13   3   10.80    6.90
  -1 -13  -3   85.29    8.80
   1  13   3   88.69   11.60
   1  13   3   75.99    8.70
   2  13   3    5.30    5.60
   2  13   3   13.40    4.10
  15 -14  -3   31.60    4.60
 -15  14   3   26.60    5.20
 -15  14   3   28.00    4.50
  14 -14  -3   -2.50    4.10
 -14  14   3    4.30    4.10
 -14  14   3   -0.30    4.50
  13 -14  -3   53.29    8.20
  13 -14  -3   83.39    8.70
 -13  14   3   76.79   11.00
 -13  14   3   86.79    8.70
  12 -14  -3   28.00    5.60
  12 -14  -3   26.10    7.10
 -12  14   3   21.10    5.50
 -12  14   3   24.20    6.90
  11 -14  -3   18.70    6.20
  11 -14  -3   11.90    5.30
 -11  14   3    9.90    6.50
 -11  14   3   13.70    5.20
  10 -14  -3   11.80    6.30
  10 -14  -3   21.40    5.60
 -10  14   3   12.50    5.30
 -10  14   3   23.40    7.80
   9 -14  -3   12.50    5.80
   9 -14  -3    0.40    5.10
  -9  14   3    4.90    5.60
  -9  14   3    8.40    7.50
   8 -14  -3   75.99   11.20
   8 -14  -3   71.79    9.90
  -8  14   3   54.09    9.90
  -8  14   3   82.99   10.80
   7 -14  -3   62.49    9.60
   7 -14  -3   74.59   11.40
  -7  14   3   75.59   10.80
  -7  14   3   49.99    9.90
   6 -14  -3   64.99    9.70
   6 -14  -3   62.59   10.40
  -6  14   3   71.09   10.70
  -6  14   3   73.99   10.70
   5 -14  -3   16.30    5.80
   5 -14  -3    9.60    6.20
  -5  14   3   17.90    6.20
  -5  14   3    1.30    7.70
   4 -14  -3   28.40    5.80
   4 -14  -3   15.70    6.00
  -4  14   3   17.10    6.10
  -4  14   3   22.10    8.20
   3 -14  -3   23.80    5.50
   3 -14  -3   21.00    6.60
  -3  14   3   14.90    5.80
  -3  14   3   15.80    7.80
   2 -14  -3   30.80    5.50
   2 -14  -3   22.30    7.80
  -2  14   3   27.50    6.00
  -2  14   3   25.40    7.80
  -1  14   3   88.69   11.80
  -1  14   3   94.89    9.60
   0  14   3    0.40    3.80
   0  14   3    2.20    5.40
   1  14   3   30.70    6.10
   1  14   3   32.20    4.70
  14 -15  -3   30.70    4.10
 -14  15   3   35.60    4.60
 -14  15   3   28.30    5.60
  13 -15  -3    7.00    5.40
  13 -15  -3    8.80    4.10
 -13  15   3   12.30    5.10
 -13  15   3   15.40    4.40
  12 -15  -3   94.59    8.60
  12 -15  -3   99.39   10.60
 -12  15   3   93.49   11.00
 -12  15   3  106.89    9.30
  11 -15  -3   17.80    6.10
  11 -15  -3   26.60    5.20
 -11  15   3   21.50    6.50
 -11  15   3   15.30    4.80
  10 -15  -3    9.10    4.60
  10 -15  -3   18.20    6.20
 -10  15   3    9.30    6.10
 -10  15   3   12.80    4.90
   9 -15  -3   49.50    7.70
   9 -15  -3   64.39    8.50
  -9  15   3   76.59    9.10
  -9  15   3   83.89   11.40
   8 -15  -3   55.39    8.20
  -8  15   3   67.09    9.30
  -8  15   3   41.20    8.40
   7 -15  -3   54.29    8.20
   7 -15  -3   41.40    6.90
  -7  15   3   44.70    8.50
  -7  15   3   70.89    9.10
   6 -15  -3   65.29    9.90
   6 -15  -3   75.59    8.60
  -6  15   3   74.89    9.80
  -6  15   3   65.69    9.10
   5 -15  -3   11.30    5.50
   5 -15  -3   12.00    4.80
  -5  15   3   21.20    7.00
  -5  15   3   11.80    5.00
   4 -15  -3   17.00    6.30
  -4  15   3   27.00    5.20
  -4  15   3   19.80    7.20
   3 -15  -3  106.79   12.10
  -3  15   3  118.29   10.10
  -3  15   3  111.69   11.80
  -2  15   3    5.00    4.10
  -2  15   3    3.30    6.00
  -1  15   3   36.30    4.90
  -1  15   3   38.30    6.30
  12 -16  -3    3.40    4.40
 -12  16   3    5.70    3.70
 -12  16   3    4.70    4.90
  11 -16  -3   13.70    5.00
 -11  16   3   16.60    5.70
 -11  16   3   22.30    4.40
  10 -16  -3    6.20    4.00
 -10  16   3    8.40    4.00
 -10  16   3    3.80    5.10
   9 -16  -3    0.50    4.20
  -9  16   3   -0.40    3.70
  -9  16   3    1.20    5.20
   8 -16  -3    8.30    4.50
  -8  16   3   10.60    5.80
  -8  16   3    7.30    4.20
   7 -16  -3   -2.70    4.10
  -7  16   3   -4.60    5.50
  -7  16   3    2.00    4.00
   6 -16  -3    6.00    4.70
  -6  16   3    3.40    5.60
  -6  16   3    1.40    3.80
   5 -16  -3   17.50    5.10
  -5  16   3   16.90    5.90
  -5  16   3   14.10    4.30
   4 -16  -3    0.50    5.80
  -4  16   3   -0.90    5.00
  -4  16   3    1.80    3.50
  -4  16  -4    8.30    4.00
  -4  16  -4   12.70    4.70
   4 -16   4   11.30    3.60
   4 -16   4    9.10    4.60
  -5  16  -4    5.60    4.00
  -5  16  -4   12.70    4.90
   5 -16   4    4.20    4.10
   5 -16   4    7.00    3.90
  -6  16  -4    3.40    4.80
  -6  16  -4    3.50    4.10
   6 -16   4    4.90    3.80
   6 -16   4    2.30    3.90
  -7  16  -4    3.20    4.00
  -7  16  -4    3.50    4.60
   7 -16   4    4.90    3.80
   7 -16   4    3.20    4.10
  -8  16  -4   14.40    4.30
  -8  16  -4    5.10    5.10
   8 -16   4    7.20    4.00
   8 -16   4    1.90    4.00
  -9  16  -4    6.50    4.80
  -9  16  -4    3.40    4.20
   9 -16   4   -4.70    3.30
   9 -16   4    2.50    3.80
 -10  16  -4    7.20    4.40
 -10  16  -4    3.30    4.20
  10 -16   4    2.00    3.60
  10 -16   4    7.30    4.00
 -11  16  -4    7.70    4.70
 -11  16  -4    5.10    4.40
  11 -16   4   11.90    3.80
  11 -16   4   13.10    4.50
 -12  16  -4    6.90    4.20
  12 -16   4   11.70    3.70
  12 -16   4    6.30    4.40
  -2  15  -4   57.49    7.00
  -2  15  -4   42.90    6.80
   2 -15   4   58.49    7.10
   2 -15   4   53.29    7.40
  -3  15  -4   42.20    6.60
  -3  15  -4   38.00    5.30
   3 -15   4   34.70    6.40
   3 -15   4   40.20    5.60
  -4  15  -4   15.80    4.60
  -4  15  -4   16.80    6.00
   4 -15   4    9.10    4.40
   4 -15   4   10.10    4.60
  -5  15  -4   -0.20    4.40
  -5  15  -4    9.20    5.90
   5 -15   4    5.30    4.70
   5 -15   4    2.70    4.50
  -6  15  -4   15.90    4.90
  -6  15  -4   17.90    6.40
   6 -15   4   21.50    5.60
  -7  15  -4   59.19    8.60
  -7  15  -4   80.19   10.80
   7 -15   4   58.39    8.80
   7 -15   4   54.09    9.00
  -8  15  -4   80.79    9.00
  -8  15  -4   48.30    8.10
   8 -15   4   63.89    9.10
   8 -15   4   72.69    9.70
  -9  15  -4   27.90    5.40
  -9  15  -4   32.50    6.80
   9 -15   4   17.20    5.20
   9 -15   4   21.80    6.00
 -10  15  -4    6.70    5.30
 -10  15  -4    9.10    4.60
  10 -15   4    4.00    4.60
  10 -15   4    3.00    4.30
 -11  15  -4   17.10    4.90
 -11  15  -4   15.50    5.60
  11 -15   4   15.70    5.50
  11 -15   4   15.70    4.60
 -12  15  -4   38.50    5.80
 -12  15  -4   35.90    5.90
  12 -15   4   35.70    6.70
  12 -15   4   36.90    5.60
 -13  15  -4   64.99    8.20
  13 -15   4   61.19    7.10
  13 -15   4   65.39   10.80
   0  14  -4  100.89    8.50
   0  14  -4  101.49   10.10
   0 -14   4   87.59    8.70
  -1  14  -4   28.60    4.90
  -1  14  -4   24.10    6.10
   1 -14   4   21.20    5.40
  -2  14  -4   22.20    6.50
  -2  14  -4   16.10    4.90
   2 -14   4   16.20    5.30
   2 -14   4   29.30    6.70
  -3  14  -4   -1.40    4.40
  -3  14  -4    1.20    6.00
   3 -14   4    1.80    4.90
  -4  14  -4   -1.00    6.10
  -4  14  -4    0.70    4.80
   4 -14   4    5.50    5.10
  -5  14  -4   15.70    7.10
  -5  14  -4   13.90    5.60
   5 -14   4   12.50    5.60
  -6  14  -4   49.30    8.80
  -6  14  -4   75.39   10.00
   6 -14   4   57.69    8.30
  -7  14  -4  102.99   13.70
  -7  14  -4  105.89   10.90
   7 -14   4   99.49   11.50
  -8  14  -4   65.59    9.90
  -8  14  -4   85.59   13.00
   8 -14   4   63.69   10.00
  -9  14  -4    8.60    5.10
  -9  14  -4   13.10    6.90
   9 -14   4   10.30    5.70
 -10  14  -4    5.80    6.10
 -10  14  -4    4.20    5.00
  10 -14   4   -0.90    5.20
  10 -14   4    6.60    5.00
 -11  14  -4    5.90    5.10
 -11  14  -4    6.80    5.80
  11 -14   4   -2.20    5.40
  11 -14   4    2.70    4.90
 -12  14  -4   24.50    6.30
 -12  14  -4   23.70    5.50
  12 -14   4   24.50    5.70
  12 -14   4   10.30    6.10
 -13  14  -4   19.00    5.60
 -13  14  -4   26.80    5.90
  13 -14   4   16.90    4.90
  13 -14   4   32.20    8.30
 -14  14  -4   81.29   13.60
 -14  14  -4   90.29    9.20
  14 -14   4   81.59    8.40
   2  13  -4   64.29    8.40
   2  13  -4   71.39    7.50
  -2 -13   4   66.19    7.70
   1  13  -4   33.10    5.20
   1  13  -4   25.70    6.10
  -1 -13   4   22.30    5.30
   0  13  -4    1.90    5.60
   0  13  -4    0.00    4.40
   0 -13   4    2.00    8.00
   0 -13   4    0.80    4.70
  -1  13  -4   30.60    6.00
  -1  13  -4   24.80    7.40
   1 -13   4   36.50    7.00
  -2  13  -4  122.79   11.70
  -2  13  -4  104.09   14.20
   2 -13   4  147.09   13.20
  -3  13  -4  199.48   17.50
  -3  13  -4  212.18   15.30
   3 -13   4  185.18   14.70
   3 -13   4  200.28   16.10
  -4  13  -4   33.10    7.00
  -4  13  -4   20.10    8.20
   4 -13   4   18.00    6.10
   4 -13   4   27.30    6.90
  -5  13  -4   32.90    8.70
  -5  13  -4   33.50    6.80
   5 -13   4   49.50    7.20
   5 -13   4   41.00    7.60
  -6  13  -4   14.30    7.80
  -6  13  -4    4.10    5.70
   6 -13   4   23.10    6.80
   6 -13   4   15.70    8.50
  -7  13  -4   13.50    6.10
  -7  13  -4   21.30    8.40
   7 -13   4   24.30    7.10
   7 -13   4   17.80    8.20
  -8  13  -4   45.50    7.60
  -8  13  -4   52.19    9.60
   8 -13   4   25.70    7.30
  -9  13  -4   20.10    7.60
  -9  13  -4   26.40    6.40
   9 -13   4   29.60    7.40
 -10  13  -4  193.98   14.40
 -10  13  -4  185.88   16.60
  10 -13   4  196.58   16.20
  10 -13   4  167.78   15.00
 -11  13  -4  128.59   13.60
 -11  13  -4  131.79   11.90
  11 -13   4  138.09   14.20
  11 -13   4  110.29   12.20
 -12  13  -4   25.10    6.10
 -12  13  -4   32.00    7.50
  12 -13   4   43.90    8.70
  12 -13   4   32.50    7.00
 -13  13  -4   -0.40    5.40
 -13  13  -4    2.20    5.60
  13 -13   4    2.60    4.90
  13 -13   4   -0.50    9.20
 -14  13  -4   36.70   11.70
 -14  13  -4   28.10    6.10
  14 -13   4   15.00    5.10
 -15  13  -4   63.79    8.50
 -15  13  -4   71.89   11.60
  15 -13   4   63.79    7.80
   4  12  -4    6.80    4.10
  -4 -12   4   11.00    4.00
   3  12  -4   61.59    8.70
   3  12  -4   35.40    5.20
  -3 -12   4   34.90    5.70
   2  12  -4   21.20    5.00
   2  12  -4   21.00    6.40
  -2 -12   4   23.00    5.70
   1  12  -4   37.50    7.70
   1  12  -4   29.00    5.60
  -1 -12   4   31.30    6.70
   0  12  -4    7.80    6.60
   0  12  -4    6.00    5.10
   0 -12   4   -3.20    8.70
   0 -12   4    8.20    5.90
  -1  12  -4   86.39   10.40
  -1  12  -4  105.19   14.50
   1 -12   4   94.59   12.10
   1 -12   4   79.49   11.30
  -2  12  -4   19.90    8.50
  -2  12  -4   28.50    6.80
   2 -12   4   24.00    7.30
   2 -12   4   17.80    6.10
   2 -12   4    6.30    7.50
  -3  12  -4   72.69   11.10
  -3  12  -4   49.50    9.90
   3 -12   4   56.79    8.90
   3 -12   4   77.59    9.20
   3 -12   4   47.70    8.10
  -4  12  -4  203.58   16.30
  -4  12  -4  226.08   19.00
   4 -12   4  188.98   17.20
   4 -12   4  222.48   15.60
   4 -12   4  201.48   14.50
  -5  12  -4   58.99   10.80
  -5  12  -4   45.40    8.00
   5 -12   4   50.69    7.50
   5 -12   4   52.29    9.20
   5 -12   4   35.90    6.30
  -6  12  -4    6.00    6.40
  -6  12  -4   -0.10    7.70
   6 -12   4   -2.30    6.40
   6 -12   4    8.10    5.70
   6 -12   4    3.00    5.00
  -7  12  -4   44.80    7.90
  -7  12  -4   44.70    9.80
   7 -12   4   45.70    7.20
   7 -12   4   55.69    9.40
  -8  12  -4  194.78   15.70
  -8  12  -4  227.18   19.00
   8 -12   4  211.28   17.20
   8 -12   4  197.68   15.00
  -9  12  -4   74.39   10.60
   9 -12   4   46.10    8.50
   9 -12   4   40.70    8.30
 -10  12  -4   19.80    6.40
 -10  12  -4   19.00    7.70
  10 -12   4   15.30    7.00
  10 -12   4   11.60    8.70
 -11  12  -4   87.49   13.10
 -11  12  -4   96.49   11.20
  11 -12   4   71.79   11.80
  11 -12   4  100.99   14.10
 -12  12  -4    7.10    6.20
 -12  12  -4    0.20    5.60
  12 -12   4    3.30    8.40
  12 -12   4   -2.80    5.80
 -13  12  -4   23.20    6.20
 -13  12  -4   41.90    7.70
  13 -12   4   33.50    7.00
 -14  12  -4   23.40    9.70
 -14  12  -4   16.40    6.00
  14 -12   4   17.60    5.70
 -15  12  -4   40.80    6.50
 -15  12  -4   28.70    9.50
  15 -12   4   30.10    5.60
 -16  12  -4    8.50    7.60
 -16  12  -4   11.70    4.80
  16 -12   4   14.00    4.40
   5  11  -4   10.00    4.30
   5  11  -4   -0.30    4.30
  -5 -11   4    4.90    3.90
   4  11  -4    8.50    4.30
   4  11  -4    6.40    5.20
  -4 -11   4   19.10    5.10
   3  11  -4    0.30    5.60
   3  11  -4    1.40    4.20
  -3 -11   4    0.20    4.80
   2  11  -4  148.19   14.40
  -2 -11   4  111.59   12.70
   1  11  -4   93.09   13.90
  -1 -11   4   87.29   11.90
   0  11  -4    0.30    7.30
   0 -11   4    5.20    6.10
   0 -11   4    0.50    8.60
   0 -11   4   -1.30    6.40
  -1  11  -4   26.40    8.40
  -1  11  -4   47.90    7.90
   1 -11   4   49.40    9.30
   1 -11   4   61.39    9.10
   1 -11   4   35.50    7.30
  -2  11  -4  184.48   14.90
  -2  11  -4  164.78   17.90
   2 -11   4  225.48   17.50
   2 -11   4  200.48   14.50
   2 -11   4  194.88   13.70
  -3  11  -4    3.30    8.30
  -3  11  -4    2.70    6.70
   3 -11   4    6.10    4.60
   3 -11   4    4.50    5.10
   3 -11   4    8.70    7.00
  -4  11  -4   90.79   12.00
  -4  11  -4   94.29   12.40
   4 -11   4   75.59    8.30
   4 -11   4   86.69    9.40
   4 -11   4   56.29    9.80
  -5  11  -4  268.17   21.00
  -5  11  -4  255.77   18.10
   5 -11   4  260.07   19.40
   5 -11   4  251.17   16.00
   5 -11   4  241.28   16.00
  -6  11  -4  235.38   20.60
  -6  11  -4  249.97   18.00
   6 -11   4  272.17   19.20
   6 -11   4  245.58   15.70
   6 -11   4  246.78   16.00
  -7  11  -4   90.29   12.00
  -7  11  -4   70.79   11.10
   7 -11   4   90.49   13.30
   7 -11   4  100.79    9.80
   7 -11   4   88.99    9.70
  -8  11  -4    4.40    6.40
  -8  11  -4   -0.50    7.50
   8 -11   4   -5.20    7.10
   8 -11   4   -8.80    9.70
   8 -11   4   11.40    5.80
  -9  11  -4  199.58   14.70
   9 -11   4  156.68   15.80
   9 -11   4  151.68   13.70
 -10  11  -4   42.20    8.60
 -10  11  -4   54.99    8.20
  10 -11   4   26.40    8.10
  10 -11   4   35.00    8.10
 -11  11  -4    1.70    6.80
 -11  11  -4  -13.80    5.60
  11 -11   4   -1.00   11.60
  11 -11   4  -15.70    7.90
  11 -11   4    0.20    6.70
 -12  11  -4  102.99   12.80
 -12  11  -4   89.89   11.10
  12 -11   4   68.19   11.80
  12 -11   4   81.99   12.20
 -13  11  -4  120.09   13.90
 -13  11  -4  123.09   12.30
  13 -11   4  132.09   13.10
 -14  11  -4    7.30    5.90
 -14  11  -4   -8.70    8.90
  14 -11   4    8.50    5.80
 -15  11  -4   -3.00    8.10
 -15  11  -4   10.20    5.50
  15 -11   4   20.40    5.60
 -16  11  -4    6.20    7.10
 -16  11  -4   11.50    4.90
  16 -11   4    4.20    4.40
   6  10  -4   11.70    4.70
   6  10  -4    4.70    4.50
  -6 -10   4    5.90    4.00
   5  10  -4   10.10    4.30
   5  10  -4    2.60    5.00
  -5 -10   4    2.80    4.70
   4  10  -4    3.30    5.40
  -4 -10   4    1.50    5.10
   3  10  -4  192.08   14.00
   3  10  -4  194.78   16.50
  -3 -10   4  201.38   16.30
   2  10  -4   19.60    5.70
   2  10  -4   26.80   13.60
   2  10  -4   20.50    7.30
  -2 -10   4    7.50    6.50
   1  10  -4   56.69    7.90
   1  10  -4   61.29    9.90
  -1 -10   4   48.10    7.60
  -1 -10   4   43.10    8.80
   0  10  -4   27.00    8.60
   0  10  -4   19.40    5.90
   0 -10   4   23.10    5.80
   0 -10   4   13.40    7.60
   0 -10   4   22.50    6.50
  -1  10  -4  442.96   25.90
  -1  10  -4  427.66   28.40
   1 -10   4  508.05   25.20
   1 -10   4  472.95   24.70
   1 -10   4  468.05   28.20
  -2  10  -4   18.50    8.50
   2 -10   4    3.30    9.00
   2 -10   4   19.00    7.70
   2 -10   4   16.00    4.70
  -3  10  -4  126.19   16.70
  -3  10  -4  128.49   13.40
   3 -10   4  124.59   10.10
   3 -10   4  114.69   14.60
  -4  10  -4  150.38   17.60
  -4  10  -4  149.49   14.50
   4 -10   4  148.59   15.80
   4 -10   4  155.38   14.90
   4 -10   4  182.08   11.40
  -5  10  -4   45.10   10.60
  -5  10  -4   64.69    9.40
   5 -10   4   55.19    9.30
   5 -10   4   70.49    9.70
   5 -10   4   66.39    7.40
   5 -10   4   69.79    7.60
  -6  10  -4  174.58   18.10
  -6  10  -4  182.18   14.80
   6 -10   4  158.58   14.40
   6 -10   4  159.38   16.10
   6 -10   4  156.18   11.40
   6 -10   4  165.88   11.50
  -7  10  -4  135.49   14.00
  -7  10  -4  142.59   16.30
   7 -10   4  144.09   10.70
   7 -10   4  144.79   14.00
   7 -10   4  141.09   11.00
   7 -10   4  119.19   15.00
  -8  10  -4   11.40    8.40
  -8  10  -4   18.30    7.30
   8 -10   4   13.90    7.60
   8 -10   4   27.60    5.70
   8 -10   4   11.40    7.20
  -9  10  -4  460.75   27.40
  -9  10  -4  484.35   25.30
   9 -10   4  394.36   26.20
   9 -10   4  451.35   26.70
   9 -10   4  384.26   23.60
 -10  10  -4   17.50    7.60
 -10  10  -4    8.10    6.50
  10 -10   4    4.30    6.90
  10 -10   4   16.60    7.70
  10 -10   4   15.90   10.20
 -11  10  -4   41.50    7.70
 -11  10  -4   41.20    8.90
  11 -10   4   28.10   11.10
  11 -10   4   40.00   11.40
  11 -10   4   42.50   12.40
  11 -10   4   51.39    9.30
 -12  10  -4   27.90    6.70
 -12  10  -4   14.20    7.30
  12 -10   4   16.20   18.30
  12 -10   4   17.20    7.90
 -13  10  -4  165.48   16.40
 -13  10  -4  199.78   14.80
  13 -10   4  218.88   16.70
 -14  10  -4    8.20    8.60
 -14  10  -4    0.90    6.10
  14 -10   4    3.20    6.20
 -15  10  -4    3.80    5.40
 -15  10  -4    6.80    7.90
  15 -10   4   10.90    5.80
 -16  10  -4   -0.90    5.10
 -16  10  -4    9.90    6.70
  16 -10   4    3.00    4.70
   7   9  -4   -2.00    4.90
   7   9  -4    6.60    4.30
  -7  -9   4    3.20    4.40
   6   9  -4   31.10    6.50
  -6  -9   4   27.70    6.10
   5   9  -4   12.70    6.30
   5   9  -4    8.70   16.40
   5   9  -4    6.40    4.40
   4   9  -4   31.00    6.00
   4   9  -4    4.50   16.70
   4   9  -4   30.80    7.80
  -4  -9   4   23.60    7.40
   3   9  -4   63.79    9.00
   3   9  -4   53.69    9.10
   3   9  -4   52.09   12.60
   3   9  -4   24.40   17.60
  -3  -9   4   49.20    8.60
   2   9  -4  194.28   19.70
   2   9  -4  176.28   24.90
   2   9  -4  189.58   14.40
   2   9  -4  204.08   17.70
  -2  -9   4  181.28   17.10
   1   9  -4  481.85   27.90
   1   9  -4  473.35   29.20
   1   9  -4  451.95   25.00
  -1  -9   4  449.86   24.10
  -1  -9   4  424.56   27.50
  -1  -9   4  422.36   23.60
   0   9  -4  112.99   14.70
   0   9  -4  140.99   12.50
   0   9  -4  131.39   15.60
   0  -9   4  132.99   10.20
   0  -9   4  123.59   14.80
  -1   9  -4  535.75   28.80
  -1   9  -4  539.15   30.80
   1  -9   4  504.65   29.70
   1  -9   4  537.45   27.00
   1  -9   4  559.74   31.00
  -2   9  -4   55.89    9.60
   2  -9   4   54.69    6.50
   2  -9   4   57.29   10.20
   2  -9   4   48.90    8.20
  -3   9  -4   43.00   10.10
   3  -9   4   41.10    6.10
   3  -9   4   30.00    6.80
   3  -9   4   55.29   10.20
   4  -9   4  181.68   13.80
   4  -9   4  189.58   12.00
   5  -9   4  198.98   14.50
   5  -9   4  220.38   13.10
  -6   9  -4   30.80    9.60
  -6   9  -4   34.80    8.10
   6  -9   4   39.80    5.30
   6  -9   4   34.90   13.40
   6  -9   4   38.80    6.70
   6  -9   4   41.00    6.30
  -7   9  -4   49.40    8.70
  -7   9  -4   46.30   10.00
   7  -9   4   61.39    6.80
   7  -9   4   43.70    6.90
   7  -9   4   47.90    9.90
   7  -9   4   51.89    6.60
  -8   9  -4  555.64   32.20
  -8   9  -4  536.35   30.10
   8  -9   4  590.94   28.40
   8  -9   4  517.25   29.60
   8  -9   4  591.64   32.40
  -9   9  -4  123.39   13.10
  -9   9  -4  120.09   15.30
   9  -9   4  125.29   15.20
   9  -9   4  120.49   10.70
   9  -9   4  125.59   13.20
 -10   9  -4  419.66   25.10
 -10   9  -4  430.66   27.10
  10  -9   4  438.36   26.70
  10  -9   4  479.05   25.20
  10  -9   4  456.05   27.90
 -11   9  -4  177.28   14.80
 -11   9  -4  160.68   16.40
  11  -9   4  164.98   18.70
  11  -9   4  213.28   17.40
 -12   9  -4   56.39    9.60
 -12   9  -4   61.19    8.50
  12  -9   4   55.49    9.60
  12  -9   4   40.90   18.60
  12  -9   4   70.79   14.10
 -13   9  -4   23.90    7.60
 -13   9  -4   37.40    7.30
  13  -9   4   32.40    8.40
 -14   9  -4   20.60    6.80
 -14   9  -4   14.30    8.70
  14  -9   4   21.10    7.50
 -15   9  -4   25.60    6.60
 -15   9  -4   16.90    7.70
  15  -9   4   16.60    6.70
 -16   9  -4   -4.00    6.30
 -16   9  -4    4.00    5.40
  16  -9   4   -1.50    5.10
   8   8  -4   13.60    4.70
  -8  -8   4    6.20    4.30
   7   8  -4   64.29    7.90
   7   8  -4   65.49    9.80
   7   8  -4   41.80   15.30
  -7  -8   4   60.99    8.50
   6   8  -4   88.19   12.10
   6   8  -4   88.99   16.50
   6   8  -4   58.59    8.40
  -6  -8   4   73.59   11.30
   5   8  -4   31.50   15.40
   5   8  -4   39.90    8.20
   5   8  -4   39.00    6.20
  -5  -8   4   24.50    7.50
   4   8  -4  203.18   14.30
   4   8  -4  210.28   17.50
   4   8  -4  150.88   21.50
   4   8  -4  197.08   21.20
  -4  -8   4  188.38   16.70
   3   8  -4  -27.50   17.60
   3   8  -4    2.80    6.90
   3   8  -4    3.20    5.50
   3   8  -4   -2.80    8.30
  -3  -8   4    5.80    7.20
  -3  -8   4   18.40    6.20
   2   8  -4   19.10    6.10
   2   8  -4   22.20    7.80
   2   8  -4   27.60   18.80
   2   8  -4   11.30    7.30
  -2  -8   4    2.10    9.10
  -2  -8   4   15.20    7.60
  -2  -8   4   21.90    5.60
   1   8  -4  526.15   28.60
   1   8  -4  531.15   31.00
   1   8  -4  557.44   31.20
  -1  -8   4  556.44   27.10
  -1  -8   4  493.15   29.90
  -1  -8   4  561.44   31.50
   0   8  -4  201.08   17.60
   0   8  -4  189.28   14.70
   0   8  -4  185.98   14.70
   0  -8   4  189.58   14.90
   0  -8   4  200.68   17.50
   0  -8   4  183.58   11.70
  -1   8  -4   98.19   10.30
   1  -8   4   64.79    9.50
   1  -8   4   68.89    6.90
   2  -8   4  208.48   14.50
   2  -8   4  233.68   13.10
   3  -8   4  198.68   13.30
   3  -8   4  206.08   12.20
   4  -8   4   82.59    8.50
   4  -8   4   92.19    7.30
   5  -8   4  237.18   13.50
   5  -8   4  231.78   14.40
   6  -8   4  236.38   14.00
   6  -8   4  241.68   14.80
   7  -8   4   98.69    8.30
   7  -8   4   89.29    7.40
   7  -8   4   93.89    9.00
  -8   8  -4  161.48   14.90
  -8   8  -4  165.88   16.90
   8  -8   4  156.18   25.80
   8  -8   4  184.48   13.30
   8  -8   4  192.28   11.40
  -9   8  -4  510.25   29.30
  -9   8  -4  532.65   31.10
   9  -8   4  596.24   32.40
   9  -8   4  558.54   29.40
   9  -8   4  549.85   27.70
 -10   8  -4   18.80    6.90
 -10   8  -4   10.20    7.70
  10  -8   4   26.30    6.90
  10  -8   4    3.10    8.20
  10  -8   4   36.80    7.70
  10  -8   4   22.70    5.30
 -11   8  -4    1.70    6.40
 -11   8  -4    7.30    7.20
  11  -8   4   -2.20    5.40
  11  -8   4    1.80    8.40
  11  -8   4    2.30    8.20
  11  -8   4   -9.20   12.20
 -12   8  -4  206.98   17.70
 -12   8  -4  190.28   15.30
  12  -8   4  171.98   20.20
  12  -8   4  166.58   26.00
  12  -8   4  201.38   18.40
 -13   8  -4   35.80    8.70
 -13   8  -4   36.30    9.50
  13  -8   4   44.70    9.40
 -14   8  -4   84.09   11.90
 -14   8  -4   75.99   11.90
 -15   8  -4   65.49   10.00
 -15   8  -4   43.50    8.70
  15  -8   4   65.89    9.50
 -16   8  -4    7.10    5.90
 -16   8  -4    7.20    5.90
  16  -8   4    5.80    5.70
   9   7  -4    2.50    4.20
   9   7  -4    2.30   13.40
  -9  -7   4    1.90    4.30
   8   7  -4   57.69   13.90
   8   7  -4   63.79    7.90
   8   7  -4   40.70    6.80
  -8  -7   4   40.60    7.00
   7   7  -4  103.39   12.20
   7   7  -4   87.19    9.10
   7   7  -4   76.69   15.50
  -7  -7   4   80.69   11.70
   6   7  -4   18.10   13.70
   6   7  -4   12.10    6.40
   6   7  -4   16.40    5.30
   6   7  -4   16.30   14.90
  -6  -7   4   12.50    7.40
   5   7  -4   48.60    9.00
   5   7  -4   46.10    7.00
   5   7  -4   41.70   16.50
   5   7  -4   50.79   12.20
  -5  -7   4   46.80    9.10
   4   7  -4   86.99   14.80
   4   7  -4  108.39   18.50
   4   7  -4   68.29   10.10
   4   7  -4   65.39   10.10
   4   7  -4   81.79    8.50
  -4  -7   4   75.39   11.00
   3   7  -4  138.09   15.10
   3   7  -4  123.19   13.90
   3   7  -4  139.89   12.00
   3   7  -4  112.09    9.90
   3   7  -4  103.29   19.50
  -3  -7   4  126.19   10.20
  -3  -7   4  130.09   15.30
  -3  -7   4  140.79   16.00
   2   7  -4   51.29    8.70
   2   7  -4   34.40    9.00
   2   7  -4   50.39    7.20
   2   7  -4   41.50    6.90
  -2  -7   4   65.09   10.70
  -2  -7   4   44.10    6.70
  -2  -7   4   34.60    5.90
  -2  -7   4   46.90    8.10
   1   7  -4   81.59   10.00
  -1  -7   4   85.69    7.70
  -1  -7   4   79.39    7.40
  -1  -7   4   94.79   10.50
   0   7  -4  123.09   10.80
   0   7  -4  100.29   14.60
   0  -7   4  127.89   10.60
   0  -7   4  122.89    8.70
  -1   7  -4  264.97   15.70
   1  -7   4  241.18   13.40
   1  -7   4  228.58   14.70
   2  -7   4 1252.77   57.39
   2  -7   4 1242.48   58.39
   3  -7   4  515.15   24.50
   3  -7   4  480.75   25.20
   4  -7   4  528.15   27.10
   4  -7   4  553.94   26.40
   5  -7   4 1324.87   61.89
   5  -7   4 1334.67   61.19
   6  -7   4  246.28   14.90
   6  -7   4  263.87   14.20
   7  -7   4  109.49    9.30
   7  -7   4  134.39    8.50
   7  -7   4  138.69    9.30
   8  -7   4   78.89    8.20
   8  -7   4   81.89    6.90
  -9   7  -4   54.59    8.10
  -9   7  -4   65.49   10.00
   9  -7   4   40.50    6.50
   9  -7   4   53.09    6.20
   9  -7   4   51.89   10.80
 -10   7  -4  133.79   14.50
 -10   7  -4  138.49   13.30
  10  -7   4   95.49   12.20
  10  -7   4  141.99   12.40
  10  -7   4  135.99   15.50
  10  -7   4  126.19    9.80
 -11   7  -4  111.89   14.40
 -11   7  -4   89.69   12.20
  11  -7   4   71.09   12.20
  11  -7   4   68.49   15.20
  11  -7   4   80.69   12.80
  11  -7   4   69.79    8.30
 -12   7  -4   54.89    8.40
 -12   7  -4   55.19    9.60
  12  -7   4   42.90    6.00
  12  -7   4   36.10   11.20
  12  -7   4   45.40   10.50
 -13   7  -4   17.30    7.40
 -13   7  -4   16.90    8.50
  13  -7   4   25.30    9.20
 -14   7  -4   91.49   12.20
 -14   7  -4  100.49   14.40
  14  -7   4   61.79   10.00
 -15   7  -4   68.29    9.50
 -15   7  -4   52.29    7.90
  15  -7   4   60.29    9.50
 -16   7  -4    3.90    5.50
 -16   7  -4    0.80    6.70
  16  -7   4    3.70    5.80
  10   6  -4    2.40    4.10
  10   6  -4  -10.90   10.60
 -10  -6   4    3.70    4.40
   9   6  -4   26.30   12.40
   9   6  -4   28.90    5.50
   9   6  -4   31.00    6.20
  -9  -6   4   14.10    5.60
   8   6  -4   68.09    8.40
   8   6  -4   80.69   14.30
   8   6  -4   73.59   11.00
  -8  -6   4   43.70    8.10
   7   6  -4   40.90   13.60
   7   6  -4   11.80   15.70
   7   6  -4   16.60    5.30
   7   6  -4   21.80    7.10
  -7  -6   4   26.30    7.90
   6   6  -4    5.60    4.90
   6   6  -4   10.70    7.30
   6   6  -4    3.30    5.00
   6   6  -4   -3.70   14.50
   6   6  -4    0.50   10.00
  -6  -6   4    3.40    7.40
   5   6  -4  212.88   14.10
   5   6  -4  204.38   17.90
   5   6  -4  301.47   28.00
   5   6  -4  214.58   15.10
   5   6  -4  229.38   19.30
  -5  -6   4  211.78   21.60
  -5  -6   4  239.78   19.40
   4   6  -4  154.28   11.00
   4   6  -4  154.08   12.80
   4   6  -4  126.89   25.90
   4   6  -4  159.68   14.70
   4   6  -4  142.29   15.10
  -4  -6   4  182.58   17.30
  -4  -6   4  149.49   11.50
  -4  -6   4  134.49   15.30
   3   6  -4   32.30    5.20
   3   6  -4   30.60    6.70
   3   6  -4   30.00    6.70
   3   6  -4   29.60    9.60
  -3  -6   4   19.70   15.50
  -3  -6   4   23.80    5.10
  -3  -6   4   34.10    5.40
  -3  -6   4   32.80    7.10
   2   6  -4  232.98   15.30
   2   6  -4  174.58   18.20
   2   6  -4  214.78   13.00
  -2  -6   4  216.48   14.70
  -2  -6   4  224.28   12.50
  -2  -6   4  219.08   12.70
   1   6  -4  223.48   13.90
   1   6  -4  235.48   15.40
  -1  -6   4  248.28   13.10
  -1  -6   4  254.07   15.30
  -1  -6   4  258.17   13.60
   0   6  -4   71.89    7.60
   0   6  -4   75.19   10.00
   0  -6   4   69.99    7.20
   0  -6   4   62.19    5.40
   0  -6   4   71.29    6.20
  -1   6  -4   84.79    7.80
   1  -6   4   82.79    7.30
   1  -6   4   86.89    6.60
   2  -6   4  929.01   43.80
   2  -6   4  926.81   42.90
   3  -6   4 1134.69   51.59
   3  -6   4 1077.39   50.69
   4  -6   4  923.81   43.70
   4  -6   4  933.91   43.10
   5  -6   4   71.29    6.20
   5  -6   4   76.19    6.50
   6  -6   4   68.49    6.20
   6  -6   4   70.19    6.60
   7  -6   4  238.78   14.30
   7  -6   4  246.58   12.90
   8  -6   4  220.98   13.70
   8  -6   4  209.58   12.00
  -9   6  -4   22.40    8.20
   9  -6   4   42.50    6.50
   9  -6   4   33.50    5.10
 -10   6  -4  142.39   14.10
 -10   6  -4  146.49   16.10
  10  -6   4  165.58   13.10
  10  -6   4  170.98   10.90
  10  -6   4  147.29   17.60
  10  -6   4  180.88   17.10
 -11   6  -4  240.28   19.30
 -11   6  -4  231.48   17.40
  11  -6   4  256.17   18.00
  11  -6   4  242.58   14.20
  11  -6   4  240.88   21.10
 -12   6  -4    6.40    8.20
 -12   6  -4    3.00    7.60
 -12   6  -4    7.90    7.60
  12  -6   4    3.70    4.40
  12  -6   4    4.60    8.40
  12  -6   4    1.70    9.50
 -13   6  -4   13.10    7.40
 -13   6  -4   18.00    8.00
  13  -6   4   15.20    5.00
  13  -6   4   24.40    9.60
 -14   6  -4   46.10    8.70
 -14   6  -4   79.79   11.90
  14  -6   4   54.19   10.30
 -15   6  -4   30.60    7.00
 -15   6  -4   38.00    7.80
  15  -6   4   42.90    9.00
 -16   6  -4    4.30    5.30
 -16   6  -4    6.00    5.80
  16  -6   4    4.70    5.90
  11   5  -4   13.40   10.00
  11   5  -4    8.90    4.40
 -11  -5   4    7.30    4.40
  10   5  -4    4.50    4.90
  10   5  -4   -4.70   10.10
 -10  -5   4    0.50    4.90
   9   5  -4   16.50   11.70
   9   5  -4   13.80    6.10
   9   5  -4   12.10    4.90
  -9  -5   4    8.20    6.20
   8   5  -4   28.60    5.70
   8   5  -4   18.20   12.50
   8   5  -4   32.40    7.10
  -8  -5   4   41.60    8.70
   7   5  -4   41.50    6.50
   7   5  -4   47.90    6.50
   7   5  -4   51.99   14.70
   7   5  -4   59.79   11.90
   7   5  -4   43.90    8.50
  -7  -5   4   27.30   15.00
  -7  -5   4   61.69    9.40
  -7  -5   4   41.90    9.40
   6   5  -4  215.28   18.90
   6   5  -4  229.48   15.50
   6   5  -4  247.28   17.90
   6   5  -4  241.28   26.60
   6   5  -4  221.58   14.30
  -6  -5   4  224.28   18.40
  -6  -5   4  242.38   20.20
  -6  -5   4  237.18   21.20
   5   5  -4   54.29    7.50
   5   5  -4   47.30    8.50
   5   5  -4   45.00    8.40
   5   5  -4   61.19    7.90
   5   5  -4   39.90   15.90
  -5  -5   4   73.69   12.40
  -5  -5   4   57.89    9.30
  -5  -5   4   72.99   11.70
  -5  -5   4   58.29    7.30
   4   5  -4  178.68   11.50
   4   5  -4  177.08   13.70
   4   5  -4  151.28   18.90
  -4  -5   4  195.18   14.50
  -4  -5   4  178.58   11.70
  -4  -5   4  166.28   11.70
   3   5  -4  203.08   12.50
   3   5  -4  191.58   14.10
   3   5  -4  172.58   18.00
  -3  -5   4  235.68   12.60
  -3  -5   4  211.88   12.10
  -3  -5   4  223.18   14.50
   2   5  -4 1194.48   55.19
   2   5  -4 1091.39   57.49
   2   5  -4 1224.58   57.09
  -2  -5   4 1263.07   56.79
  -2  -5   4 1220.28   55.09
  -2  -5   4 1191.38   54.69
   1   5  -4   61.79    8.90
   1   5  -4   91.09    7.70
  -1  -5   4   85.09    7.30
  -1  -5   4   81.99    6.20
  -1  -5   4   72.69    5.50
   0   5  -4   77.49    7.00
   0   5  -4   68.39    7.80
   0  -5   4   67.59    4.90
   0  -5   4   79.39    5.70
   0  -5   4   60.99    6.20
  -1   5  -4  215.98   14.00
  -1   5  -4  230.68   13.60
   1  -5   4  247.58   13.20
   1  -5   4  260.77   12.80
   2  -5   4 1076.39   50.49
   2  -5   4 1108.89   49.90
   3  -5   4 1182.78   53.29
   3  -5   4 1128.09   52.59
   4  -5   4  243.88   12.60
   4  -5   4  238.68   13.10
   5  -5   4   64.29    5.70
   5  -5   4   71.09    5.80
   6  -5   4   87.49    6.80
   6  -5   4   82.79    6.70
   7  -5   4 1213.58   54.99
   7  -5   4 1208.18   56.49
   8  -5   4  193.38   12.20
   8  -5   4  182.18   10.50
   9  -5   4  180.38   12.60
 -10   5  -4   54.49    8.90
 -10   5  -4   72.09   10.70
  10  -5   4   70.89    9.40
  10  -5   4   48.40   11.30
  10  -5   4   33.30   12.00
  10  -5   4   66.69    7.40
 -11   5  -4  218.28   17.90
 -11   5  -4  237.48   19.50
 -11   5  -4  228.58   19.00
  11  -5   4  230.88   21.60
  11  -5   4  233.18   18.00
  11  -5   4  236.58   13.80
 -12   5  -4   43.10    8.80
 -12   5  -4   38.80    9.30
  12  -5   4   44.30   11.30
  12  -5   4   46.10    6.50
  12  -5   4   47.90    7.50
  12  -5   4   39.30    9.80
 -13   5  -4   40.80    8.80
 -13   5  -4   36.60    8.40
  13  -5   4   29.50   10.20
  13  -5   4   38.60    5.40
 -14   5  -4   10.50    7.30
 -14   5  -4   12.60    6.70
  14  -5   4   21.80    9.10
 -15   5  -4   -0.80    6.00
 -15   5  -4    4.00    5.90
 -15   5  -4    3.50    7.10
  15  -5   4    8.40    7.70
 -16   5  -4    4.90    4.60
 -16   5  -4    8.30    6.30
  16  -5   4   -0.30    6.20
  12   4  -4   15.50    8.30
  12   4  -4    0.50    4.00
 -12  -4   4    3.70    4.10
  11   4  -4   10.00    4.80
  11   4  -4   14.00    8.90
 -11  -4   4    3.00    5.00
  10   4  -4    2.90    5.20
  10   4  -4    5.20   10.00
  10   4  -4    4.10    5.20
 -10  -4   4    6.10    6.00
   9   4  -4   22.40   11.90
   9   4  -4   31.60    5.60
   9   4  -4   28.30    7.30
  -9  -4   4   22.50    8.10
  -9  -4   4   21.80    7.90
   8   4  -4  193.88   13.90
   8   4  -4  185.48   13.60
   8   4  -4  186.78   16.30
   8   4  -4  210.08   22.90
   8   4  -4  202.68   20.60
  -8  -4   4  173.28   26.70
  -8  -4   4  197.68   17.10
  -8  -4   4  207.88   18.50
   7   4  -4   84.59    9.20
   7   4  -4   94.29   14.80
   7   4  -4   77.69    9.70
   7   4  -4   94.29   12.80
   7   4  -4   85.29   13.90
  -7  -4   4   73.19   13.50
  -7  -4   4   84.39   12.20
  -7  -4   4   63.39    9.80
   6   4  -4  149.49   14.40
   6   4  -4  148.19   23.40
   6   4  -4  140.99   11.90
   6   4  -4  141.39   10.60
   6   4  -4  154.28   14.40
  -6  -4   4  147.99   15.00
  -6  -4   4  168.38   17.60
  -6  -4   4  146.29   17.90
  -6  -4   4  146.59   15.30
   5   4  -4  197.08   11.70
   5   4  -4  196.28   14.10
   5   4  -4  172.68   18.70
  -5  -4   4  150.98   11.80
  -5  -4   4  172.88   13.90
  -5  -4   4  165.88   11.80
   4   4  -4   68.49   10.20
   4   4  -4   67.39    7.10
   4   4  -4   74.39    8.00
  -4  -4   4   77.09    7.40
  -4  -4   4   67.29    6.80
  -4  -4   4   67.19    8.40
   3   4  -4  469.75   24.30
   3   4  -4  475.45   25.00
   3   4  -4  431.86   25.80
  -3  -4   4  493.75   23.50
  -3  -4   4  475.05   23.00
  -3  -4   4  505.75   25.10
   2   4  -4  900.61   41.50
   2   4  -4  836.82   41.80
  -2  -4   4  848.42   39.50
  -2  -4   4  847.52   40.10
  -2  -4   4  882.11   41.30
   1   4  -4  260.47   13.70
   1   4  -4  244.38   14.00
  -1  -4   4  225.98   12.50
  -1  -4   4  228.98   13.10
  -1  -4   4  226.38   11.70
   0   4  -4  550.94   25.90
   0   4  -4  503.55   25.80
   0  -4   4  525.95   24.20
   0  -4   4  516.95   25.40
  -1   4  -4  146.09    9.10
  -1   4  -4  154.88    8.90
   1  -4   4  133.69    8.40
   2  -4   4   18.20    3.10
   3  -4   4  162.08    9.20
   4  -4   4  566.54   27.00
   5  -4   4  253.47   13.50
   6  -4   4  890.71   42.60
   6  -4   4  928.81   41.40
   7  -4   4  435.96   21.40
   7  -4   4  477.45   23.20
   8  -4   4   64.79    5.90
   8  -4   4   81.79    7.20
   9  -4   4  192.98   13.00
   9  -4   4  179.08   16.60
 -10   4  -4  153.68   16.50
 -10   4  -4  156.78   16.20
 -10   4  -4  151.48   15.90
  10  -4   4  138.49   12.50
  10  -4   4  134.39   20.30
  10  -4   4  148.29   10.30
 -11   4  -4   90.69   13.90
 -11   4  -4   68.29   10.60
  11  -4   4   88.79    8.40
  11  -4   4   91.79   12.90
 -12   4  -4  193.68   18.70
 -12   4  -4  201.28   17.60
 -12   4  -4  224.58   18.00
  12  -4   4  182.58   13.00
  12  -4   4  189.88   21.20
  12  -4   4  191.18   12.50
  12  -4   4  189.28   18.10
 -13   4  -4   29.00    8.40
 -13   4  -4   27.90    7.50
  13  -4   4   20.70   11.10
  13  -4   4   19.10    4.70
  13  -4   4    9.50    7.50
 -14   4  -4   -3.60    7.20
 -14   4  -4   -2.20    5.90
  14  -4   4   -2.60    5.40
  14  -4   4    6.40    9.20
 -15   4  -4   14.00    6.80
 -15   4  -4    6.20    5.30
  15  -4   4   15.40    8.10
 -16   4  -4    6.00    4.40
  16  -4   4    8.90    3.90
  16  -4   4   13.90    7.30
  12   3  -4   39.60    9.40
  12   3  -4   38.20    6.20
 -12  -3   4   38.70    6.50
  11   3  -4    7.30    5.40
  11   3  -4   -4.20    9.10
 -11  -3   4    3.30    6.30
  10   3  -4  179.88   13.00
  10   3  -4  178.68   15.30
  10   3  -4  167.38   19.90
 -10  -3   4  198.98   16.10
 -10  -3   4  187.28   16.90
   9   3  -4   41.70    7.80
   9   3  -4   61.99    7.90
   9   3  -4   58.59   13.30
   9   3  -4   47.40   12.50
   9   3  -4   55.99    7.00
  -9  -3   4   72.09    9.60
  -9  -3   4   45.10    9.20
  -9  -3   4   29.00   14.80
   8   3  -4    2.90    5.00
   8   3  -4   -0.30    8.10
   8   3  -4    1.10    5.00
   8   3  -4   12.00   11.20
   8   3  -4   13.10    6.40
  -8  -3   4   -2.50    7.90
  -8  -3   4    9.60    7.30
  -8  -3   4    5.90    9.90
   7   3  -4  168.68   22.10
   7   3  -4  134.59   13.50
   7   3  -4  128.19   10.20
   7   3  -4  142.59   11.20
   7   3  -4  113.49   13.10
  -7  -3   4  129.39   13.20
  -7  -3   4  120.79   14.30
  -7  -3   4  138.49   17.10
  -7  -3   4  125.29   14.60
   6   3  -4   27.70    7.30
   6   3  -4   25.10   10.90
   6   3  -4   29.50    6.40
   6   3  -4   36.90    5.10
   6   3  -4   26.40    6.40
  -6  -3   4   33.10    6.30
  -6  -3   4   38.70    6.20
  -6  -3   4   36.00    6.90
   5   3  -4  211.48   13.70
   5   3  -4  208.48   16.00
   5   3  -4  226.18   12.20
  -5  -3   4  183.28   12.00
  -5  -3   4  190.48   12.30
  -5  -3   4  183.68   13.40
   4   3  -4  470.95   25.70
   4   3  -4  506.85   25.00
  -4  -3   4  449.26   23.10
  -4  -3   4  485.15   24.90
  -4  -3   4  465.15   23.50
   3   3  -4  959.80   48.00
   3   3  -4 1037.50   47.70
  -3  -3   4 1007.40   46.20
  -3  -3   4 1074.79   47.80
  -3  -3   4  975.10   46.60
   2   3  -4 1102.69   50.89
   2   3  -4 1112.39   51.39
  -2  -3   4 1063.79   49.40
  -2  -3   4 1105.99   50.89
   1   3  -4  129.59    8.70
   1   3  -4  137.19    8.60
  -1  -3   4  137.89    8.40
  -1  -3   4  147.69    7.10
   0   3  -4 2005.10   86.89
   0   3  -4 1871.31   86.79
   0  -3   4 1906.01   86.49
   0  -3   4 1915.11   85.39
  -1   3  -4 1405.56   63.69
  -1   3  -4 1452.35   63.79
   1  -3   4 1358.36   63.39
   2  -3   4 1559.94   70.29
   3  -3   4 2014.10   90.29
   4  -3   4  146.39    8.30
   5  -3   4 1171.78   53.69
   6  -3   4 1090.89   48.60
   6  -3   4 1000.70   46.90
   7  -3   4  529.15   24.90
   7  -3   4  463.35   22.60
   8  -3   4  229.28   13.70
   8  -3   4  215.48   16.40
   9  -3   4   29.70    5.80
   9  -3   4   38.90   10.60
   9  -3   4   38.10    5.10
 -10   3  -4  122.69   15.20
 -10   3  -4  135.89   16.20
  10  -3   4  129.09    9.80
  10  -3   4  128.89   16.50
  10  -3   4  143.49   12.70
 -11   3  -4    8.80    8.20
 -11   3  -4   10.40    7.40
 -11   3  -4    5.90    7.20
  11  -3   4    2.40    4.00
  11  -3   4    1.60    6.70
  11  -3   4   14.60   11.90
 -12   3  -4   55.39    9.80
 -12   3  -4   78.69   12.50
 -12   3  -4   36.40   11.20
  12  -3   4   60.79    7.80
  12  -3   4   51.99   11.30
  12  -3   4   55.79   12.70
  12  -3   4   71.59    8.40
 -13   3  -4  171.48   15.90
 -13   3  -4  188.38   17.00
  13  -3   4  150.48   21.70
  13  -3   4  188.78   11.80
 -14   3  -4    0.50    7.10
 -14   3  -4    8.60    5.60
 -14   3  -4   -4.10    9.60
  14  -3   4   11.30    9.50
  14  -3   4    1.20    4.80
 -15   3  -4   21.30    7.90
 -15   3  -4   45.20    6.50
  15  -3   4   45.30    9.70
  13   2  -4   53.89    9.00
  13   2  -4   42.90    6.30
 -13  -2   4   57.59    8.30
  12   2  -4   21.50    8.30
  12   2  -4   23.90    5.90
 -12  -2   4   23.90    6.50
  11   2  -4   98.19   12.10
  11   2  -4  120.09   16.90
 -11  -2   4  113.99   13.70
 -11  -2   4  114.09   12.90
  10   2  -4   14.70    5.50
  10   2  -4    1.80    7.90
  10   2  -4   24.40   12.10
  10   2  -4    2.50    9.50
  10   2  -4   17.00    6.40
 -10  -2   4   10.70    7.00
 -10  -2   4    6.50   16.80
 -10  -2   4   11.40    7.40
   9   2  -4  177.08   13.40
   9   2  -4  166.08   12.80
   9   2  -4  161.18   15.10
   9   2  -4  157.18   20.30
   9   2  -4  162.48   18.20
  -9  -2   4  166.28   20.10
  -9  -2   4  197.28   17.70
  -9  -2   4  188.48   16.40
   8   2  -4   23.50    5.70
   8   2  -4   21.90    5.30
   8   2  -4   14.70    7.40
   8   2  -4   28.70   11.70
  -8  -2   4   19.50    8.80
  -8  -2   4   19.20    8.40
  -8  -2   4   11.90    7.40
  -8  -2   4    7.50    7.90
  -8  -2   4   16.50    6.60
   7   2  -4   60.49    9.40
   7   2  -4   48.10    6.70
   7   2  -4   59.19    7.30
   7   2  -4   55.69   11.40
  -7  -2   4   45.50    7.10
  -7  -2   4   45.80    8.00
  -7  -2   4   54.39   11.70
  -7  -2   4   39.00    8.40
  -7  -2   4   63.29    9.30
   6   2  -4  226.18   12.70
   6   2  -4  213.88   16.50
   6   2  -4  236.38   14.70
  -6  -2   4  205.38   14.60
  -6  -2   4  194.18   13.00
   5   2  -4 1197.38   55.39
   5   2  -4 1213.98   56.29
  -5  -2   4 1167.18   55.49
  -5  -2   4 1107.89   53.79
   4   2  -4  843.22   41.10
   4   2  -4  845.22   40.50
  -4  -2   4  835.52   39.30
  -4  -2   4  880.21   40.90
   3   2  -4 1039.10   49.60
   3   2  -4 1093.69   49.40
  -3  -2   4 1045.00   48.10
  -3  -2   4 1069.59   49.40
   2   2  -4   10.60    3.00
   2   2  -4   11.40    2.60
  -2  -2   4   11.90    1.60
  -2  -2   4    8.50    2.30
   1   2  -4 1378.36   65.19
   1   2  -4 1418.86   65.39
  -1  -2   4 1495.85   64.09
  -1  -2   4 1479.15   65.29
   0   2  -4  468.15   21.90
   0   2  -4  470.15   21.90
   0  -2   4  452.45   21.70
   2  -2   4  490.85   22.80
   3  -2   4 1366.06   61.49
   4  -2   4   11.50    2.00
   5  -2   4 1051.89   46.10
   5  -2   4 1012.80   47.40
   6  -2   4  789.42   39.80
   6  -2   4  865.81   39.00
   7  -2   4 1253.97   56.29
   7  -2   4 1155.18   57.39
   8  -2   4  233.38   13.70
   8  -2   4  186.98   18.20
  -9   2  -4   43.80   16.40
  -9   2  -4   54.29   10.00
   9  -2   4   59.39    7.40
   9  -2   4   63.79    8.30
 -10   2  -4   17.80    7.10
 -10   2  -4   20.40    8.90
 -10   2  -4   23.40    8.50
  10  -2   4   18.20    6.80
  10  -2   4   24.10    4.90
  10  -2   4   22.80   14.30
 -11   2  -4  170.08   17.60
 -11   2  -4  186.78   16.60
 -11   2  -4  178.18   17.70
  11  -2   4  161.78   19.90
  11  -2   4  184.18   11.70
  11  -2   4  181.38   16.80
  11  -2   4  179.48   12.00
 -12   2  -4    9.30   12.10
 -12   2  -4   27.70    8.10
 -12   2  -4   19.20    8.70
  12  -2   4    3.40    9.90
  12  -2   4   15.80    5.00
  12  -2   4   14.30    4.20
  12  -2   4   17.40   12.40
 -13   2  -4  134.99   13.60
 -13   2  -4  100.29   15.10
  13  -2   4  137.19   20.60
  13  -2   4  134.79    9.90
 -14   2  -4   10.20    5.60
 -14   2  -4   22.00    7.90
  14  -2   4    0.40    4.90
  14  -2   4   16.60   10.70
 -15   2  -4   56.29    7.80
  15  -2   4   54.19    7.20
  15  -2   4   42.50   10.10
  13   1  -4   23.60    7.60
  13   1  -4   20.40    5.50
 -13  -1   4   23.20    6.50
  12   1  -4   12.30    8.00
  12   1  -4   17.70    5.90
 -12  -1   4   39.90    7.30
 -12  -1   4   22.00    7.10
  11   1  -4   54.69    7.40
  11   1  -4   78.19   12.80
  11   1  -4   84.19   11.00
 -11  -1   4   86.99   12.70
 -11  -1   4   66.79   10.10
  10   1  -4   44.20   11.10
  10   1  -4   31.80    6.40
  10   1  -4   38.10   10.40
  10   1  -4   40.90    7.90
 -10  -1   4   45.40   13.40
 -10  -1   4   62.79   11.20
 -10  -1   4   48.90    9.10
   9   1  -4  403.16   28.80
   9   1  -4  404.66   22.40
   9   1  -4  405.06   26.40
   9   1  -4  391.96   22.40
  -9  -1   4  390.76   26.70
  -9  -1   4  445.66   23.10
  -9  -1   4  469.65   26.70
  -9  -1   4  395.86   25.50
  -9  -1   4  482.75   28.30
   8   1  -4  508.65   26.50
   8   1  -4  493.05   33.30
   8   1  -4  481.05   28.60
   8   1  -4  506.95   25.90
   8   1  -4  522.65   32.50
  -8  -1   4  526.45   31.60
  -8  -1   4  514.65   27.10
  -8  -1   4  539.55   28.10
  -8  -1   4  563.24   29.60
  -8  -1   4  518.65   29.30
   7   1  -4   80.39   11.70
   7   1  -4   92.29    7.90
   7   1  -4   95.29    9.00
  -7  -1   4   73.49    9.60
  -7  -1   4   65.99    8.20
   6   1  -4  249.97   16.40
   6   1  -4  234.48   14.50
   6   1  -4  246.48   13.40
  -6  -1   4  225.08   13.50
   5   1  -4   69.39    6.70
   5   1  -4   74.89    7.80
  -5  -1   4   81.59    6.00
   4   1  -4  231.68   13.00
   4   1  -4  222.38   13.30
  -4  -1   4  249.28   12.10
   3   1  -4  148.79    9.10
   3   1  -4  153.68    8.80
   2   1  -4 1471.95   64.79
   2   1  -4 1393.66   64.59
   0   1  -4 2044.90   87.19
   0   1  -4 1870.11   87.09
   0   1  -4 1988.30   86.39
   0  -1   4 1922.21   86.99
   1  -1   4 2068.99   91.89
   3  -1   4 1457.95   65.39
   4  -1   4  140.29    6.50
   4  -1   4  144.99    7.90
   5  -1   4  217.28   11.30
   5  -1   4  198.98   12.50
   6  -1   4   72.19    8.70
   6  -1   4   73.69    6.00
   7  -1   4  200.48   16.90
   7  -1   4  272.47   14.40
  -8   1  -4   74.19    8.90
   8  -1   4   96.59    8.70
  -9   1  -4  506.45   30.90
  -9   1  -4  536.85   29.70
  -9   1  -4  555.94   30.60
   9  -1   4  557.54   29.30
   9  -1   4  522.75   26.70
 -10   1  -4  470.45   27.00
 -10   1  -4  409.76   26.60
 -10   1  -4  446.36   27.40
  10  -1   4  421.06   25.90
  10  -1   4  438.36   34.00
  10  -1   4  421.46   22.50
 -11   1  -4   78.59   12.20
 -11   1  -4   35.50   10.60
 -11   1  -4   43.40   10.10
  11  -1   4   45.00    6.60
  11  -1   4   36.30   14.30
  11  -1   4   40.10    5.70
  11  -1   4   19.70    8.90
 -12   1  -4  113.09   12.70
 -12   1  -4   60.59   10.90
  12  -1   4   94.89    8.40
  12  -1   4   59.19   14.40
  12  -1   4   86.09    9.20
 -13   1  -4   29.10    6.80
 -13   1  -4   38.10    9.40
  13  -1   4   33.30   13.10
  13  -1   4   31.60    5.00
 -14   1  -4   20.00    5.40
  14  -1   4   17.50    5.00
  14  -1   4    9.20   11.30
  14   0  -4   91.29   11.50
  14   0  -4  111.69   10.00
 -14   0   4  100.19   10.40
  13   0  -4    5.70    6.90
  13   0  -4    1.10    5.00
 -13   0   4    6.10    6.00
 -13   0   4    5.70    5.90
  12   0  -4   -1.60    7.70
  12   0  -4    8.50    5.30
 -12   0   4    3.90    7.10
 -12   0   4   -1.00    6.00
  11   0  -4    3.00    5.60
  11   0  -4    6.40    6.20
  11   0  -4    6.70    8.80
  11   0  -4   -6.10   12.60
 -11   0   4    5.50    8.50
 -11   0   4   13.20   13.20
 -11   0   4   -3.10    6.10
  10   0  -4    2.30    7.10
  10   0  -4   24.40    9.60
  10   0  -4    4.00    9.80
  10   0  -4   12.40    5.70
 -10   0   4    1.30   10.60
 -10   0   4   18.60   10.00
 -10   0   4   14.30    7.20
 -10   0   4    4.60    6.20
 -10   0   4   13.00    8.80
   9   0  -4  128.39   11.20
   9   0  -4  113.99   13.20
   9   0  -4  107.59   16.20
   9   0  -4  126.39   10.90
   9   0  -4  105.39   16.80
  -9   0   4  129.69   12.20
  -9   0   4  114.69   13.50
  -9   0   4  107.09   13.80
  -9   0   4  130.19   17.20
  -9   0   4  106.39   13.20
   8   0  -4  166.68   13.50
   8   0  -4  169.08   15.50
   8   0  -4  173.88   11.40
  -8   0   4  171.38   16.10
  -8   0   4  169.78   12.50
   7   0  -4  116.99   11.20
   7   0  -4  128.99   10.20
   7   0  -4  113.09    9.00
  -7   0   4  115.29    9.20
   6   0  -4   59.59    6.30
   6   0  -4   61.59    7.40
   5   0  -4   58.09    6.20
   5   0  -4   65.49    5.70
   4   0  -4  541.85   26.90
   4   0  -4  544.15   26.60
   4   0  -4  586.24   25.90
   3   0  -4 1900.31   87.79
   3   0  -4 2064.19   87.39
   3   0  -4 1909.71   87.99
   2   0  -4  474.25   22.20
   2   0  -4  465.35   22.20
   2   0  -4  492.25   22.00
   1   0  -4 1926.91   88.59
   1   0  -4 1993.40   88.69
   1   0  -4 2067.49   88.79
   0   0  -4    1.00    0.60
   0   0  -4    0.80    0.80
   0   0  -4    1.00    0.60
   0   0   4    0.20    0.50
   0   0   4    1.20    0.70
  -1   0  -4 2010.80   91.19
  -1   0  -4 2091.69   90.89
   1   0   4 2048.00   90.79
   2   0   4  468.15   21.40
   3   0   4 1831.02   81.79
   4   0   4  548.75   25.00
   4   0   4  508.85   25.80
  -5   0  -4   69.19    6.00
   5   0   4   73.19    5.50
   5   0   4   55.29    8.70
  -6   0  -4   77.89    6.90
   6   0   4   60.19    8.80
   6   0   4   66.99    6.20
  -7   0  -4  133.29   10.00
   7   0   4  130.79    9.60
  -8   0  -4  179.48   16.40
  -8   0  -4  189.38   13.30
   8   0   4  171.28   11.70
   8   0   4  176.98   12.90
  -9   0  -4  132.09   14.60
  -9   0  -4  145.69   17.40
  -9   0  -4  128.29   13.40
   9   0   4   85.89   23.50
   9   0   4  122.09    9.80
   9   0   4  132.49   12.90
 -10   0  -4   12.20    9.10
 -10   0  -4   11.70    7.30
 -10   0  -4    9.90   10.30
 -10   0  -4    7.00    8.30
  10   0   4   -1.50   16.80
  10   0   4   13.50    4.60
  10   0   4   11.40    3.90
  10   0   4   16.30    7.60
 -11   0  -4   -0.70    6.70
 -11   0  -4    6.10   10.40
 -11   0  -4    0.50   12.30
 -11   0  -4    4.00    8.80
  11   0   4    8.90   10.20
  11   0   4    4.00    4.10
  11   0   4    3.80   15.10
  11   0   4    4.20    4.00
 -12   0  -4    5.20    6.20
 -12   0  -4  -10.60    8.10
  12   0   4    6.40   13.70
  12   0   4    6.90    5.10
  12   0   4    9.20    3.90
 -13   0  -4    2.80    4.90
 -13   0  -4   -2.20    8.70
  13   0   4    3.50    7.60
  13   0   4  -23.50   12.90
  13   0   4   -0.60    3.80
 -14   0  -4   88.39    9.40
  14   0   4  105.19    8.90
  14  -1  -4   20.50    6.60
  14  -1  -4   26.60    5.80
 -14   1   4   30.90    6.80
 -14   1   4   17.90    5.80
  13  -1  -4   27.30    8.60
  13  -1  -4   27.20    6.20
 -13   1   4   28.20    6.60
 -13   1   4   33.30    8.10
  12  -1  -4   85.99   11.50
  12  -1  -4   89.29   12.80
 -12   1   4   99.99   15.00
 -12   1   4   92.19   12.10
  11  -1  -4   35.80   12.60
  11  -1  -4   54.09   11.20
  11  -1  -4   40.50    7.40
 -11   1   4   33.90    6.80
 -11   1   4   33.90   13.00
 -11   1   4   28.50    7.60
 -11   1   4   27.30   10.30
 -11   1   4   33.00   12.40
  10  -1  -4  431.86   30.50
  10  -1  -4  427.96   26.80
  10  -1  -4  453.85   28.40
  10  -1  -4  444.66   22.80
 -10   1   4  376.66   27.70
 -10   1   4  415.36   25.60
 -10   1   4  380.76   25.50
 -10   1   4  422.56   23.40
   9  -1  -4  495.95   26.10
   9  -1  -4  506.85   28.70
   9  -1  -4  504.25   31.40
   9  -1  -4  564.74   31.40
   9  -1  -4  506.45   26.30
  -9   1   4  521.65   32.50
  -9   1   4  513.75   27.50
  -9   1   4  541.95   28.10
  -9   1   4  506.15   29.50
   8  -1  -4   72.29    8.70
   8  -1  -4   77.49   11.30
   8  -1  -4   76.59    8.40
   7  -1  -4  219.48   13.50
   7  -1  -4  222.18   14.40
   6  -1  -4   83.19    5.90
   6  -1  -4   92.19    7.70
   6  -1  -4   82.29    6.80
   5  -1  -4  251.07   12.30
   5  -1  -4  233.98   13.00
   5  -1  -4  246.88   13.40
   4  -1  -4  131.39    7.90
[truncated: 1,533,302 more chars]
